# Supplementary material for: Gas transport in firn: multiple-tracer characterisation and model intercomparison for NEEM, Northern Greenland
Source: Copernicus journal article supplement (doi:10.5194/acp-12-4259-2012), 2012-05-14
Supplement: Supplementary file 1 [file DATA_NEEM08_META_DEC_2010.xls]

## Sheet: Sheet1
Gas	borehole	filename	unit	laboratory
CO2	EU	DATA_NEEM08_EU_CO2_v2.txt	ppm	CSIRO, IUP, NOAA
CO2	US	DATA_NEEM08_US_CO2_v2.txt	ppm	IUP, NOAA
CO2	EU + US	DATA_NEEM08_ALL_CO2_v2.txt	ppm	CSIRO, IUP, NOAA
CH4	EU	DATA_NEEM08_EU_CH4.txt	ppb	CSIRO, NOAA
CH4	US	DATA_NEEM08_US_CH4.txt	ppb	IUP, NOAA
CH4	EU + US	DATA_NEEM08_ALL_CH4.txt	ppb	CSIRO, IUP, NOAA
SF6	EU	DATA_NEEM08_EU_SF6_v2.txt	ppt	IUP, NOAA, UEA
SF6	US	DATA_NEEM08_US_SF6.txt	ppt	IUP, NOAA
SF6	EU + US	DATA_NEEM08_ALL_SF6_v2.txt	ppt	IUP, NOAA, UEA
14CO2	EU	DATA_NEEM08_EU_14CO2_v2.txt	1E-12 ppm	CSIRO
CFC-11	EU	DATA_NEEM08_EU_CFC11_v2.txt	ppt	UEA
CFC-12	EU	DATA_NEEM08_EU_CFC12_v3.txt	ppt	UEA
CFC-113	EU	DATA_NEEM08_EU_CFC113_v2.txt	ppt	UEA
CH3CCL3	EU	DATA_NEEM08_EU_CH3CCL3_v3.txt	ppt	UEA
HFC-134a	EU	DATA_NEEM08_EU_HFC134a_v2.txt	ppt	UEA
d15N2	EU/US	DATA_NEEM08_EU_d15N2.txt	arb. units	SIO
