# Supplementary material for: Gas transport in firn: multiple-tracer characterisation and model intercomparison for NEEM, Northern Greenland
Source: Copernicus journal article supplement (doi:10.5194/acp-12-4259-2012), 2012-05-14
Supplement: Supplementary file 2 [file NEEM08_Total_uncertainty_estimates_dec.xls]

## Sheet: CO2
EU only													US only													EU + US
DATA MEANS			DATA UNCERTAINTIES			IN SITU	SEASONAL	CONTAMINATION	RECONSTRUCTION	TOTAL			DATA MEANS			DATA UNCERTAINTIES			IN SITU	SEASONAL	CONTAMINATION	RECONSTRUCTION	TOTAL			DATA MEANS			DATA UNCERTAINTIES			IN SITU	SEASONAL	CONTAMINATION	RECONSTRUCTION	TOTAL
			sampling	analytical	data total											sampling	analytical	data total											sampling	analytical	data total
Depth	CO2	grav corr	u(CO2)	u(CO2)	u(CO2)	u(CO2)	u(CO2)	u(CO2)	u(CO2)	u(CO2)			Depth	CO2	grav corr	u(CO2)	u(CO2)	u(CO2)	u(CO2)	u(CO2)	u(CO2)	u(CO2)	u(CO2)			Depth	CO2	grav corr	u(CO2)	u(CO2)	u(CO2)	u(CO2)	u(CO2)	u(CO2)	u(CO2)	u(CO2)
0	381.693	381.693	0.318128	0.13	0.343665	0	2.7512	0	0.4542	2.80954			0	381.555	381.555	0.185133	0.13	0.226218	0	2.7512	0	0.4542	2.7976			0	381.624	381.624	0.25165	0.13	0.283245	0	2.7512	0	0.4542	2.80279
4.9	386.879	386.797	0.410122	0.13	0.430232	0	2.3846	0	0.569	2.48901			2.85	386.82	386.791	0.185133	0.13	0.226218	0	2.5892	0	0.5146	2.64952			2.85	386.82	386.791	0.1851	0.13	0.22619	0	2.5892	0	0.5146	2.64952
10.1	388.181	387.97	0.318128	0.13	0.343665	0	1.6458	0	0.6621	1.80697			5.23	387.67	387.582	0.185133	0.13	0.226218	0	2.3454	0	0.5774	2.426			4.9	386.879	386.797	0.4101	0.13	0.430212	0	2.3846	0	0.569	2.48901
14.8	387.486	387.147	0.318128	0.13	0.343665	0	0.8792	0	0.6352	1.13779			9.83	388.428	388.222	0.56215	0.13	0.576986	0	1.688	0	0.6602	1.90214			5.23	387.67	387.582	0.1851	0.13	0.22619	0	2.3454	0	0.5774	2.426
19.75	386.732	386.265	0.370045	0.13	0.392216	0	0.2298	0	0.5467	0.711001			19.3	386.03	385.576	0.185133	0.13	0.226218	0	0.276	0	0.5546	0.659493			9.83	388.428	388.222	0.5621	0.13	0.576937	0	1.688	0	0.6602	1.90212
27.54	384.091	383.419	0.318128	0.13	0.343665	0	0.191	0	0.4597	0.604906			34.7	382.245	381.369	0.185133	0.13	0.226218	0	0.2042	0	0.4505	0.543895			10.1	388.181	387.97	0.3182	0.13	0.343731	0	1.6458	0	0.6621	1.80698
34.72	382.348	381.472	0.390683	0.13	0.411744	0	0.204	0	0.4505	0.643506			49.7	378.98	377.69	0.185133	0.13	0.226218	0	0.0788	0	0.4665	0.52441			14.8	387.486	387.147	0.3182	0.13	0.343731	0	0.8792	0	0.6352	1.13781
50	379.148	377.852	0.375011	0.13	0.396905	0	0.0779	0	0.4667	0.617585			57.47	376.75	375.264	0.185133	0.13	0.226218	0	0.0785	0	0.4675	0.525255			19.3	386.03	385.576	0.1851	0.13	0.22619	0	0.276	0	0.5546	0.659484
54.9	377.697	376.276	0.318128	0.13	0.343665	0	0.0746	0	0.4676	0.585082			59.9	375.3	373.758	0.185133	0.13	0.226218	0	0.082	0	0.4688	0.526946			19.75	386.732	386.265	0.37	0.13	0.392173	0	0.2298	0	0.5467	0.710977
57.4	376.71	375.225	0.318128	0.13	0.343665	0	0.0784	0	0.4675	0.585498			62	374.49	372.901	0.185133	0.13	0.226218	0	0.0808	0	0.4799	0.536663			27.54	384.091	383.419	0.3182	0.13	0.343731	0	0.191	0	0.4597	0.604943
59.9	375.356	373.814	0.318128	0.13	0.343665	0	0.082	0	0.4688	0.587029			64.03	367.663	366.086	0.251023	0.13	0.282688	0	0.0732	0	0.5135	0.590722			34.7	382.245	381.369	0.1851	0.13	0.22619	0	0.2042	0	0.4505	0.543884
61.95	373.891	372.305	0.318128	0.13	0.343665	0	0.0809	0	0.4794	0.595378			65.5	360.487	358.942	0.185133	0.13	0.226218	0	0.0646	0	0.5657	0.61267			34.72	382.348	381.472	0.3907	0.13	0.41176	0	0.204	0	0.4505	0.643516
63.85	367.245	365.671	0.318128	0.13	0.343665	0	0.0743	0	0.5094	0.618962			66.9	349.75	348.25	0.185133	0.13	0.226218	0	0.0591	0	0.6588	0.69906			49.7	378.98	377.69	0.1851	0.13	0.22619	0	0.0788	0	0.4665	0.524398
65.75	357.31	355.778	0.318128	0.13	0.343665	0	0.0634	0	0.5784	0.675775			68.3	338.712	337.26	0.185133	0.13	0.226218	0.15	0.0552	0	0.8405	0.884964			50	379.148	377.852	0.375	0.13	0.396894	0	0.0779	0	0.4667	0.617578
68.05	341.885	340.419	0.318128	0.13	0.343665	0.025	0.056	0	0.7994	0.8723			69.8	329.61	328.197	0.185133	0.13	0.226218	0.9	0.0484	0	1.0744	1.42051			54.9	377.697	376.276	0.3182	0.13	0.343731	0	0.0746	0	0.4676	0.585121
70.05	332.037	330.613	0.362261	0.13	0.384881	1.025	0.047	0.0049656	1.106	1.55699			71.4	326.023	324.625	0.185133	0.13	0.226218	1.7	0.0388	0.155491	1.3029	2.15972			57.4	376.71	375.225	0.3182	0.13	0.343731	0	0.0784	0	0.4675	0.585537
72	325.478	324.082	0.318128	0.13	0.343665	2	0.0352	0.224861	1.4255	2.49037			72.85	321.543	320.164	0.4278	0.13	0.447116	2.425	0.0303	0.342071	1.6647	2.99494			57.47	376.75	375.264	0.1851	0.13	0.22619	0	0.0785	0	0.4675	0.525243
74.08	320.496	319.122	0.324846	0.13	0.349893	3.04	0.024	0.499368	2.1837	3.79243			73.8	320.56	319.185	0.185133	0.13	0.226218	2.9	0.0254	0.463562	2.0451	3.58596			59.9	375.328	373.786	0.25165	0.13	0.283245	0	0.082	0	0.4688	0.553828
75.9	319.415	318.045	0.576043	0.13	0.590529	3.95	0.0167	0.734886	3.1614	5.14646			75.6	318.8	317.433	0.185133	0.13	0.226218	3.8	0.0177	0.702856	3.0557	4.93181			61.95	373.891	372.305	0.3182	0.13	0.343731	0	0.0809	0	0.4794	0.595416
77.75	316.96	315.601	0.318128	0.13	0.343665	4.875	0.0125	1.00336	3.3524	6.01076																62	374.49	372.901	0.1851	0.13	0.22619	0	0.0808	0	0.4799	0.536651
																										63.85	367.245	365.671	0.3182	0.13	0.343731	0	0.0743	0	0.5094	0.618999
																										64.03	367.663	366.086	0.251	0.13	0.282668	0	0.0732	0	0.5135	0.590713
																										65.5	360.487	358.942	0.1851	0.13	0.22619	0	0.0646	0	0.5657	0.612659
																										65.75	357.31	355.778	0.3182	0.13	0.343731	0	0.0634	0	0.5784	0.675809
																										66.9	349.75	348.25	0.1851	0.13	0.22619	0	0.0591	0	0.6588	0.699051
																										68.05	341.885	340.419	0.3182	0.13	0.343731	0.025	0.056	0	0.7994	0.872326
																										68.3	338.712	337.26	0.1851	0.13	0.22619	0.15	0.0552	0	0.8405	0.884957
																										69.8	329.61	328.197	0.1851	0.13	0.22619	0.9	0.0484	0	1.0744	1.42051
																										70.05	332.037	330.613	0.3623	0.13	0.384917	1.025	0.047	0.0049587	1.106	1.557
																										71.4	326.023	324.625	0.1851	0.13	0.22619	1.7	0.0388	0.155684	1.3029	2.15973
																										72	325.478	324.082	0.3182	0.13	0.343731	2	0.0352	0.224585	1.4255	2.49036
																										72.85	321.543	320.164	0.4278	0.13	0.447116	2.425	0.0303	0.342465	1.6647	2.99499
																										73.8	320.56	319.185	0.1851	0.13	0.22619	2.9	0.0254	0.464086	2.0451	3.58603
																										74.08	320.496	319.122	0.3248	0.13	0.34985	3.04	0.024	0.498804	2.1837	3.79235
																										75.6	318.8	317.433	0.1851	0.13	0.22619	3.8	0.0177	0.703629	3.0557	4.93192
																										75.9	319.415	318.045	0.576	0.13	0.590488	3.95	0.0167	0.734072	3.1614	5.14634
																										77.75	316.96	315.601	0.3182	0.13	0.343731	4.875	0.0125	1.00229	3.3524	6.01058

## Sheet: CH4
EU only											US only											EU + US
DATA MEANS			DATA UNCERTAINTIES			CONTAMINATION	RECONSTRUCTION	TOTAL			DATA MEANS			DATA UNCERTAINTIES			CONTAMINATION	RECONSTRUCTION	TOTAL			DATA MEANS			DATA UNCERTAINTIES			CONTAMINATION	RECONSTRUCTION	TOTAL
			sampling	analytical	data total									sampling	analytical	data total									sampling	analytical	data total
Depth	CH4	grav	u(CH4)	u(CH4)	u(CH4)	u(CH4)	u(CH4)	u(CH4)			Depth	CH4	grav	u(CH4)	u(CH4)	u(CH4)	u(CH4)	u(CH4)	u(CH4)			Depth	CH4	grav	u(CH4)	u(CH4)	u(CH4)	u(CH4)	u(CH4)	u(CH4)
0	1841.85	1841.85	1.81373	2.5	3.08863	0	4.6942	5.61917			0	1838.3	1838.3	2.74345	2.5	3.71167	0	4.6942	5.98431			0	1840.07	1840.07	1.81373	2.5	3.08863	0	4.6942	5.61917
4.9	1842.1	1842.43	1.81373	2.5	3.08863	0	5.0734	5.93961			2.85	1837.52	1837.63	2.74345	2.5	3.71167	0	4.8571	6.11293			2.85	1837.52	1837.63	2.74345	2.5	3.71167	0	4.8571	6.11293
10.1	1850.9	1851.76	1.81373	2.5	3.08863	0	5.8195	6.58834			5.23	1853.53	1853.89	2.74345	2.5	3.71167	0	5.1136	6.31866			4.9	1842.1	1842.43	1.81373	2.5	3.08863	0	5.0734	5.93961
14.8	1853.9	1855.28	1.81373	2.5	3.08863	0	6.5906	7.27844			9.83	1852.7	1853.53	2.74345	2.5	3.71167	0	5.7767	6.86635			5.23	1853.53	1853.89	2.74345	2.5	3.71167	0	5.1136	6.31866
19.75	1857.95	1859.86	1.81373	2.5	3.08863	0	7.3556	7.97775			19.3	1857.2	1859.06	3.32432	2.5	4.15946	0	7.2934	8.39612			9.83	1852.7	1853.53	2.74345	2.5	3.71167	0	5.7767	6.86635
27.54	1855.2	1857.97	1.81373	2.5	3.08863	0	8.0572	8.62891			34.7	1850.25	1853.87	3.38037	2.5	4.20439	0	7.9318	8.97721			10.1	1850.9	1851.76	1.81373	2.5	3.08863	0	5.8195	6.58834
34.72	1862.1	1865.75	1.81373	2.5	3.08863	0	7.9305	8.51073			49.7	1841.3	1846.67	7.42092	2.5	7.83072	0	6.8212	10.385			14.8	1853.9	1855.28	1.81373	2.5	3.08863	0	6.5906	7.27844
50	1845.05	1850.45	3.46482	2.5	4.27259	0	6.8098	8.03918			57.47	1833.88	1840.08	2.74345	2.5	3.71167	0	6.6804	7.64227			19.3	1857.2	1859.06	3.32432	2.5	4.15946	0	7.2934	8.39612
54.9	1837.7	1843.63	1.81373	2.5	3.08863	0	6.7023	7.37973			59.9	1834.1	1840.56	2.74345	2.5	3.71167	0	6.6768	7.63912			19.75	1857.95	1859.86	1.81373	2.5	3.08863	0	7.3556	7.97775
57.4	1838.3	1844.51	1.81373	2.5	3.08863	0	6.6811	7.36048			62	1838.13	1844.82	2.74345	2.5	3.71167	0	6.9789	7.90453			27.54	1855.2	1857.97	1.81373	2.5	3.08863	0	8.0572	8.62891
59.9	1835.6	1842.07	1.81373	2.5	3.08863	0	6.6768	7.35658			64.03	1820.6	1827.3	2.74345	2.5	3.71167	0	8.0855	8.89673			34.7	1850.25	1853.87	3.38037	2.5	4.20439	0	7.9318	8.97721
61.95	1832.5	1839.17	1.81373	2.5	3.08863	0	6.9653	7.61938			65.5	1795.6	1802.21	2.74345	2.5	3.71167	0	9.6479	10.3372			34.72	1862.1	1865.75	1.81373	2.5	3.08863	0	7.9305	8.51073
63.85	1817.7	1824.39	1.83848	2.5	3.10322	0	7.9525	8.53652			66.9	1727.75	1734.11	2.74345	2.5	3.71167	0	13.0653	13.5823			49.7	1841.3	1846.67	7.42092	2.5	7.83072	0	6.8212	10.385
65.75	1778.82	1785.37	2.08597	2.5	3.25596	0	10.1015	10.6133			68.3	1612.1	1618.03	3.15296	2.5	4.02382	0	18.865	19.2894			50	1845.05	1850.45	3.46482	2.5	4.27259	0	6.8098	8.03918
68.05	1644.95	1651	3.88909	2.5	4.62331	0	17.6676	18.2625			69.8	1480.9	1486.35	3.04831	2.5	3.94236	0	26.5089	26.8004			54.9	1837.7	1843.63	1.81373	2.5	3.08863	0	6.7023	7.37973
70.05	1512.35	1517.91	1.81373	2.5	3.08863	0.03295	27.4606	27.6338			71.4	1408.25	1413.43	2.94197	2.5	3.86072	1.20414	27.0026	27.3038			57.4	1838.3	1844.51	1.81373	2.5	3.08863	0	6.6811	7.36048
72	1400.3	1405.45	1.81373	2.5	3.08863	1.7662	26.1538	26.3947			72.85	1330.65	1335.54	3.45861	2.5	4.26755	2.8936	25.4425	25.9597			57.47	1833.88	1840.08	2.74345	2.5	3.71167	0	6.6804	7.64227
74.08	1293.62	1298.38	1.81373	2.5	3.08863	4.47352	24.3407	24.9404			73.8	1305.85	1310.65	2.75517	2.5	3.72034	4.04662	24.7948	25.3968			59.9	1834.85	1841.31	1.81373	2.5	3.08863	0	6.6768	7.35658
75.9	1236.78	1241.32	2.43952	2.5	3.49303	7.13989	23.2841	24.6034			75.6	1235.95	1240.5	2.74345	2.5	3.71167	6.74632	23.1322	24.3801			61.95	1832.5	1839.17	1.81373	2.5	3.08863	0	6.9653	7.61938
77.75	1186.3	1190.66	1.81373	2.5	3.08863	10.161	22.2641	24.6673														62	1838.13	1844.82	2.74345	2.5	3.71167	0	6.9789	7.90453
																						63.85	1817.7	1824.39	1.83848	2.5	3.10322	0	7.9525	8.53652
																						64.03	1820.6	1827.3	2.74345	2.5	3.71167	0	8.0855	8.89673
																						65.5	1795.6	1802.21	2.74345	2.5	3.71167	0	9.6479	10.3372
																						65.75	1778.82	1785.37	2.08597	2.5	3.25596	0	10.1015	10.6133
																						66.9	1727.75	1734.11	2.74345	2.5	3.71167	0	13.0653	13.5823
																						68.05	1644.95	1651	3.88909	2.5	4.62331	0	17.6676	18.2625
																						68.3	1612.1	1618.03	3.15296	2.5	4.02382	0	18.865	19.2894
																						69.8	1480.9	1486.35	3.04831	2.5	3.94236	0	26.5089	26.8004
																						70.05	1512.35	1517.91	1.81373	2.5	3.08863	0.0327725	27.4606	27.6338
																						71.4	1408.25	1413.43	2.94197	2.5	3.86072	1.20911	27.0026	27.304
																						72	1400.3	1405.45	1.81373	2.5	3.08863	1.7591	26.1538	26.3942
																						72.85	1330.65	1335.54	3.45861	2.5	4.26755	2.90372	25.4425	25.9608
																						73.8	1305.85	1310.65	2.75517	2.5	3.72034	4.06011	24.7948	25.399
																						74.08	1293.62	1298.38	1.81373	2.5	3.08863	4.45903	24.3407	24.9378
																						75.6	1235.95	1240.5	2.74345	2.5	3.71167	6.7662	23.1322	24.3856
																						75.9	1236.78	1241.32	2.43952	2.5	3.49303	7.11894	23.2841	24.5974
																						77.75	1186.3	1190.66	1.81373	2.5	3.08863	10.1335	22.2641	24.656

## Sheet: SF6
EU only												US only												EU + US
DATA MEANS			DATA UNCERTAINTIES			CONTAMINATION	EU-US offset	RECONSTRUCTION	TOTAL			DATA MEANS			DATA UNCERTAINTIES			CONTAMINATION	EU-US offset	RECONSTRUCTION	TOTAL			DATA MEANS			DATA UNCERTAINTIES			CONTAMINATION	EU-US offset	RECONSTRUCTION	TOTAL
			sampling	analytical	data total										sampling	analytical	data total										sampling	analytical	data total
Depth	SF6	grav corr	u(SF6)	u(SF6)	u(SF6)	u(SF6)	u(SF6)	u(SF6)	u(SF6)			Depth	SF6	grav corr	u(SF6)	u(SF6)	u(SF6)	u(SF6)	u(SF6)	u(SF6)	u(SF6)			Depth	SF6	grav corr	u(SF6)	u(SF6)	u(SF6)	u(SF6)	u(SF6)	u(SF6)	u(SF6)
0	6.60984	6.60984	0.0353658	0.04	0.0533923	0	0	0.0997	0.113097			0	6.61797	6.61797	0.029225	0.04	0.0495389	0	0	0.0997	0.111329			0	6.61391	6.61391	0.0353658	0.04	0.0533923	0	0	0.0997	0.113097
2.5	6.63156	6.62814	0.0353658	0.04	0.0533923	0	0.05	0.0996	0.123575			2.85	6.62689	6.62301	0.029225	0.04	0.0495389	0	0.05	0.0996	0.12196			2.5	6.63156	6.62814	0.0353658	0.04	0.0533923	0	0.05	0.0996	0.123575
4.9	6.60948	6.59865	0.0504616	0.04	0.0643923	0	0.1	0.0994	0.155006			5.23	6.49507	6.48367	0.029225	0.04	0.0495389	0	0.15	0.0994	0.18664			2.85	6.62689	6.62301	0.029225	0.04	0.0495389	0	0.05	0.0996	0.12196
7.55	6.55942	6.54019	0.0353658	0.04	0.0533923	0	0.2	0.0992	0.229546			9.83	6.34802	6.3221	0.0537692	0.04	0.0670159	0	0.2	0.099	0.233007			4.9	6.60948	6.59865	0.0504616	0.04	0.0643923	0	0.1	0.0994	0.155006
10.1	6.47654	6.44934	0.0353658	0.04	0.0533923	0	0.2	0.0989	0.229417			19.3	6.00209	5.94774	0.0453817	0.04	0.0604938	0	0.2	0.0982	0.230874			5.23	6.49507	6.48367	0.029225	0.04	0.0495389	0	0.15	0.0994	0.18664
14.8	6.31944	6.27679	0.0353658	0.04	0.0533923	0	0.2	0.0985	0.229244			34.7	5.46995	5.37424	0.0494269	0.04	0.0635848	0	0.2	0.0997	0.232343			7.55	6.55942	6.54019	0.0353658	0.04	0.0533923	0	0.2	0.0992	0.229546
19.75	6.1934	6.13589	0.0363582	0.04	0.0540548	0	0.2	0.0981	0.229228			49.7	4.94954	4.82187	0.0360054	0.04	0.0538181	0	0.1	0.1067	0.155825			9.83	6.34802	6.3221	0.0537692	0.04	0.0670159	0	0.2	0.099	0.233007
27.54	5.86255	5.78394	0.0353658	0.04	0.0533923	0	0.2	0.0984	0.229201			57.47	4.52762	4.39278	0.029225	0.04	0.0495389	0	0	0.1141	0.12439			10.1	6.47654	6.44934	0.0353658	0.04	0.0533923	0	0.2	0.0989	0.229417
34.72	5.66519	5.56606	0.0353658	0.04	0.0533923	0	0.2	0.0997	0.229763			59.9	4.29172	4.15871	0.029225	0.04	0.0495389	0	0	0.1175	0.127516			14.8	6.31944	6.27679	0.0353658	0.04	0.0533923	0	0.2	0.0985	0.229244
42.42	5.30112	5.18593	0.0353658	0.04	0.0533923	0	0.15	0.1026	0.189414			62	4.11827	3.98656	0.029225	0.04	0.0495389	0	0	0.1217	0.131396			19.3	6.00209	5.94774	0.0453817	0.04	0.0604938	0	0.2	0.0982	0.230874
50	5.01231	4.88246	0.0353658	0.04	0.0533923	0	0.1	0.1069	0.155815			64.03	3.25843	3.15315	0.029225	0.04	0.0495389	0	0	0.1292	0.138372			19.75	6.1934	6.13589	0.0363582	0.04	0.0540548	0	0.2	0.0981	0.229228
54.9	4.69897	4.56525	0.0353658	0.04	0.0533923	0	0.05	0.1106	0.132601			65.5	2.38489	2.30783	0.029225	0.04	0.0495389	0	0	0.1357	0.14446			27.54	5.86255	5.78394	0.0353658	0.04	0.0533923	0	0.2	0.0984	0.229201
57.4	4.54507	4.40971	0.0353658	0.04	0.0533923	0	0	0.114	0.125884			66.9	1.26328	1.22247	0.029225	0.04	0.0495389	0	0	0.1205	0.130286			34.7	5.46995	5.37424	0.0494269	0.04	0.0635848	0	0.2	0.0997	0.232343
59.9	4.27103	4.13866	0.0353658	0.04	0.0533923	0	0	0.1175	0.129062			68.3	0.56397	0.545747	0.029225	0.04	0.0495389	0	0	0.1158	0.125951			34.72	5.66519	5.56606	0.0353658	0.04	0.0533923	0	0.2	0.0997	0.229763
61.95	4.06531	3.9353	0.0353658	0.04	0.0533923	0	0	0.1216	0.132805			69.8	0.204179	0.197582	0.029225	0.04	0.0495389	0	0	0.1168	0.126871			42.42	5.30112	5.18593	0.0353658	0.04	0.0533923	0	0.15	0.1026	0.189414
63.85	3.13592	3.03459	0.0757841	0.04	0.0856927	0	0	0.1282	0.154203			71.4	0.103081	0.0997499	0.029225	0.04	0.0495389	0.0182417	0	0.1095	0.121561			49.7	4.94954	4.82187	0.0360054	0.04	0.0538181	0	0.1	0.1067	0.155825
65.75	2.00583	1.94102	0.0353658	0.04	0.0533923	0	0	0.1335	0.143781			72.85	0.0287436	0.0278149	0.029225	0.04	0.0495389	0.0375586	0	0.1045	0.121594			50	5.01231	4.88246	0.0353658	0.04	0.0533923	0	0.1	0.1069	0.155815
68.05	0.731592	0.707953	0.0359189	0.04	0.0537602	0	0	0.1156	0.127489			73.8	0.0307259	0.0297331	0.029225	0.04	0.0495389	0.0500631	0	0.1044	0.125936			54.9	4.69897	4.56525	0.0353658	0.04	0.0533923	0	0.05	0.1106	0.132601
70.05	0.273105	0.26428	0.0353658	0.04	0.0533923	0.000633674	0	0.1168	0.128427															57.4	4.54507	4.40971	0.0353658	0.04	0.0533923	0	0	0.114	0.125884
72	0.135939	0.131546	0.0385471	0.04	0.0555507	0.0258956	0	0.1058	0.122271															57.47	4.52762	4.39278	0.029225	0.04	0.0495389	0	0	0.1141	0.12439
74.08	0.0527561	0.0510514	0.0353658	0.04	0.0533923	0.0535058	0	0.1044	0.128891															59.9	4.28138	4.14868	0.0353658	0.04	0.0533923	0	0	0.1175	0.129062
75.9	0.114346	0.110651	0.103026	0.04	0.110518	0.0766469	0	0.1044	0.17026															61.95	4.06531	3.9353	0.0353658	0.04	0.0533923	0	0	0.1216	0.132805
77.75	0.0780299	0.0755086	0.0353658	0.04	0.0533923	0.101243	0	0.1044	0.15492															62	4.11827	3.98656	0.029225	0.04	0.0495389	0	0	0.1217	0.131396
																								63.85	3.13592	3.03459	0.0757841	0.04	0.0856927	0	0	0.1282	0.154203
																								64.03	3.25843	3.15315	0.029225	0.04	0.0495389	0	0	0.1292	0.138372
																								65.5	2.38489	2.30783	0.029225	0.04	0.0495389	0	0	0.1357	0.14446
																								65.75	2.00583	1.94102	0.0353658	0.04	0.0533923	0	0	0.1335	0.143781
																								66.9	1.26328	1.22247	0.029225	0.04	0.0495389	0	0	0.1205	0.130286
																								68.05	0.731592	0.707953	0.0359189	0.04	0.0537602	0	0	0.1156	0.127489
																								68.3	0.56397	0.545747	0.029225	0.04	0.0495389	0	0	0.1158	0.125951
																								69.8	0.204179	0.197582	0.029225	0.04	0.0495389	0	0	0.1168	0.126871
																								70.05	0.273105	0.26428	0.0353658	0.04	0.0533923	0.00063408	0	0.1168	0.128427
																								71.4	0.103081	0.0997499	0.029225	0.04	0.0495389	0.0182303	0	0.1095	0.121559
																								72	0.135939	0.131546	0.0385471	0.04	0.0555507	0.0259119	0	0.1058	0.122274
																								72.85	0.0287436	0.0278149	0.029225	0.04	0.0495389	0.0375354	0	0.1045	0.121586
																								73.8	0.0307259	0.0297331	0.029225	0.04	0.0495389	0.0500322	0	0.1044	0.125923
																								74.08	0.0527561	0.0510514	0.0353658	0.04	0.0533923	0.053539	0	0.1044	0.128905
																								75.9	0.114346	0.110651	0.103026	0.04	0.110518	0.0766948	0	0.1044	0.170281
																								77.75	0.0780299	0.0755086	0.0353658	0.04	0.0533923	0.101306	0	0.1044	0.154961

## Sheet: CFC-11
EU
DATA MEANS			DATA UNCERTAINTIES			CONTAMINATION	RECONSTRUCTION	TOTAL
			sampling	analytical	data total
Depth	CFC-11	grav	u(CFC-11)	u(CFC-11)	u(CFC-11)	u(CFC-11)	u(CFC-11)	u(CFC-11)
0	249.383	249.383	0.982563	1.48	1.77647	0	3.6861	4.09184
2.5	262.868	262.743	0.982563	2.95571	3.11474	0	3.6964	4.83374
4.9	252.238	251.855	0.982563	1.48	1.77647	0	3.7093	4.11275
7.55	255.634	254.94	0.982563	1.48	1.77647	0	3.7277	4.12936
10.1	250.452	249.478	0.982563	1.48	1.77647	0	3.7494	4.14896
14.8	252.088	250.512	0.982563	2.0598	2.28215	0	3.8003	4.43289
19.75	252.563	250.39	0.982563	1.48	1.77647	0	3.8682	4.25662
27.54	255.204	252.033	0.982563	1.48	1.77647	0	3.9979	4.37482
34.72	256.7	252.536	0.982563	1.48	1.77647	0	4.146	4.51056
42.42	257.793	252.598	0.982563	1.48	1.77647	0	4.3391	4.68867
50	261.583	255.296	0.982563	1.6214	1.89588	0	4.5569	4.93555
54.9	258.921	252.085	0.982563	1.48	1.77647	0	4.7177	5.04108
57.4	260.202	253.011	0.982563	1.48	1.77647	0	4.8517	5.1667
59.9	258.231	250.804	0.982563	1.48	1.77647	0	5.0511	5.35439
61.95	255.199	247.625	0.982563	1.69148	1.95615	0	5.4759	5.81481
63.85	234.723	227.685	0.982563	1.48	1.77647	0	6.3836	6.62617
65.75	199.908	193.913	0.982563	1.88558	2.12623	0	8.1725	8.44456
68.05	106.931	103.725	0.982563	1.48	1.77647	0	9.7432	9.90383
70.05	50.3765	48.8659	0.982563	1.48	1.77647	0.0199006	10.2338	10.3869
72	17.4792	16.955	0.982563	1.48	1.77647	0.927614	5.7177	6.05875
74.08	4.25224	4.12472	0.982563	1.48	1.77647	2.00027	3.8185	4.66239
75.9	2.73144	2.64953	0.982563	1.48	1.77647	2.91049	3.7847	5.09418
77.75	3.74197	3.62976	0.982563	1.48	1.77647	3.80743	3.7847	5.65476

## Sheet: CFC-12
EU
DATA MEANS			DATA UNCERTAINTIES			CONTAMINATION	RECONSTRUCTION	TOTAL
			sampling	analytical	data total
Depth	CFC-12	grav corr	u(CFC-12)	u(CFC-12)	u(CFC-12)	u(CFC-12)	u(CFC-12)	u(CFC-12)
0	538.221	538.221	2.11682	3.43	4.03061	0	2.6837	4.84232
2.5	542.488	542.268	2.11682	4.63155	5.09237	0	2.6945	5.76129
4.9	541.654	540.957	2.11682	3.43	4.03061	0	2.709	4.85639
7.55	540.713	539.467	2.11682	5.56493	5.95394	0	2.7302	6.55007
10.1	542.427	540.636	2.11682	3.43	4.03061	0	2.7564	4.88299
14.8	544.461	541.57	2.11682	3.43	4.03061	0	2.8215	4.92003
19.75	541.222	537.267	2.11682	3.43	4.03061	0	2.9143	4.97383
27.54	544.862	539.108	2.11682	3.43	4.03061	0	3.1033	5.08688
34.72	543.118	535.627	2.11682	3.43	4.03061	0	3.3335	5.23049
42.42	543.589	534.268	2.11682	3.43	4.03061	0	3.6495	5.43734
50	541.745	530.662	2.11682	5.9397	6.30563	0	4.022	7.47913
54.9	536.391	524.33	2.11682	3.43	4.03061	0	4.3064	5.89838
57.4	533.254	520.701	2.11682	3.43	4.03061	0	4.5536	6.08121
59.9	527.62	514.692	2.11682	3.43	4.03061	0	4.9217	6.36152
61.95	520.555	507.389	2.11682	4.27363	4.76915	0	5.6657	7.40574
63.85	466.938	455.007	2.11682	3.43	4.03061	0	7.1364	8.19598
65.75	393.576	383.519	2.11682	3.43	4.03061	0	10.0552	10.833
68.05	219.463	213.855	2.11682	3.43	4.03061	0	11.6065	12.2864
70.05	111.88	109.021	2.11682	3.43	4.03061	0.0426341	11.2129	11.9154
72	47.5628	46.3475	2.11682	3.43	4.03061	1.96263	6.6025	7.98065
74.08	15.9	15.4937	2.11682	3.43	4.03061	4.26214	5.5013	8.04214
75.9	9.16782	8.93356	2.11682	3.43	4.03061	6.24283	5.4945	9.24166
77.75	9.01528	8.78491	2.11682	3.43	4.03061	8.20269	5.4945	10.6639

## Sheet: CFC-113
EU
DATA MEANS			DATA UNCERTAINTIES			CONTAMINATION	RECONSTRUCTION	TOTAL
			sampling	analytical	data total
Depth	CFC-113	grav	u(CFC-113)	u(CFC-113)	u(CFC-113)	u(CFC-113)	u(CFC-113)	u(CFC-113)
0	78.446	78.446	0.310105	1.18	1.22007	0	0.781	1.44863
2.5	80.1431	80.0872	0.310105	1.18	1.22007	0	0.7842	1.45036
4.9	79.5048	79.3288	0.310105	3.04339	3.05915	0	0.7885	3.15913
7.55	81.0527	80.7316	0.310105	1.28906	1.32583	0	0.7948	1.54581
10.1	80.2838	79.8284	0.310105	1.224	1.26267	0	0.8024	1.49606
14.8	79.746	79.0197	0.310105	1.35552	1.39054	0	0.821	1.61482
19.75	80.6557	79.6459	0.310105	1.18	1.22007	0	0.8467	1.48508
27.54	80.7813	79.3231	0.310105	1.18	1.22007	0	0.8975	1.51462
34.72	80.0476	78.1647	0.310105	1.18	1.22007	0	0.9574	1.55086
42.42	80.8517	78.4932	0.310105	1.18	1.22007	0	1.037	1.60123
50	80.7562	77.952	0.310105	1.18	1.22007	0	1.1279	1.66154
54.9	80.7009	77.6255	0.310105	1.18	1.22007	0	1.1956	1.70822
57.4	78.1126	74.9986	0.310105	1.18	1.22007	0	1.2516	1.74788
59.9	75.5996	72.4645	0.310105	1.18	1.22007	0	1.3159	1.79448
61.95	74.3985	71.2158	0.310105	1.18	1.22007	0	1.409	1.86383
63.85	60.9994	58.3634	0.310105	1.18	1.22007	0	1.554	1.97572
65.75	41.4511	39.6599	0.310105	1.31783	1.35382	0	1.7887	2.24327
68.05	13.8363	13.2384	0.310105	1.18	1.22007	0	1.5192	1.94847
70.05	4.33735	4.14992	0.310105	1.18	1.22007	0.00741086	0.9383	1.53916
72	1.33689	1.27912	0.310105	1.18	1.22007	0.308436	0.8137	1.4986
74.08	0.412124	0.394315	0.310105	1.18	1.22007	0.636756	0.813	1.59843
75.9	0.577979	0.553002	0.310105	1.18	1.22007	0.918842	0.813	1.73026
77.75	0.91974	0.879995	0.310105	1.18	1.22007	1.20166	0.813	1.89566

## Sheet: CH3CCl3
EU
DATA MEANS			DATA UNCERTAINTIES			CONTAMINATION	RECONSTRUCTION	TOTAL
			sampling	analytical	data total
Depth	CH3CCl3	grav corr	u(CH3CCl3)	u(CH3CCl3)	u(CH3CCl3)	u(CH3CCl3)	u(CH3CCl3)	u(CH3CCl3)
0	11.388	11.388	0.425503	0.32	0.532403	0	0.4499	0.697039
2.5	12.0576	12.052	0.425503	0.32	0.532403	0	0.4744	0.713098
4.9	12.0774	12.0597	0.425503	0.32	0.532403	0	0.5064	0.734775
7.55	13.1708	13.1363	0.425503	0.32	0.532403	0	0.5536	0.768066
10.1	13.5023	13.4517	0.425503	0.32	0.532403	0	0.6123	0.811396
14.8	15.9168	15.8209	0.425503	0.32	0.532403	0	0.759	0.92711
19.75	19.6573	19.4943	0.425503	0.400222	0.58415	0	0.9666	1.1294
27.54	28.0684	27.7322	0.425503	0.398808	0.583182	0	1.3773	1.49568
34.72	37.0039	36.4253	0.425503	0.671044	0.794577	0	1.853	2.01618
42.42	47.0131	46.0998	0.425503	0.408161	0.589617	0	2.4678	2.53726
50	59.9959	58.6057	0.425503	0.32	0.532403	0	3.1443	3.18906
54.9	67.368	65.6528	0.425503	0.484368	0.644721	0	3.6286	3.68543
57.4	77.4663	75.4019	0.425503	0.626497	0.757331	0	4.0223	4.09298
59.9	83.4679	81.1527	0.425503	0.577706	0.717494	0	4.4137	4.47164
61.95	91.9779	89.345	0.425503	0.578306	0.717977	0	4.8964	4.94876
63.85	106.465	103.386	0.425503	0.878227	0.975876	0	5.6074	5.69168
65.75	106.537	103.455	0.425503	0.843957	0.945155	0	6.4261	6.49524
68.05	57.0125	55.3636	0.425503	0.32	0.532403	0	4.2211	4.25454
70.05	24.2487	23.5474	0.425503	0.32	0.532403	-0.00128607	1.737	1.81676
72	6.44192	6.25561	0.425503	0.32	0.532403	0.0197842	0.5779	0.786011
74.08	0.925222	0.898463	0.425503	0.32	0.532403	0.0853761	0.4188	0.682741
75.9	0.294389	0.285875	0.425503	0.32	0.532403	0.130904	0.4182	0.689551
77.75	0.160801	0.15615	0.425503	0.32	0.532403	0.174021	0.4182	0.699019

## Sheet: R134a
EU
DATA MEANS			DATA UNCERTAINTIES			CONTAMINATION	RECONSTRUCTION	TOTAL
			sampling	analytical	data total
Depth	R134a	grav	u(R134a)	u(R134a)	u(R134a)	u(R134a)	u(R134a)	u(R134a)
0	51.3207	51.3207	0.205283	0.55	0.587061	0	1.5871	1.6922
2.5	52.0997	52.0829	0.205283	0.55	0.587061	0	1.5757	1.68151
7.55	50.9487	50.8553	0.205283	0.55	0.587061	0	1.5401	1.6482
10.1	49.8929	49.7619	0.205283	0.55	0.587061	0	1.5157	1.62542
19.75	44.795	44.5344	0.205283	0.55	0.587061	0	1.3923	1.51101
27.54	40.03	39.6933	0.205283	0.55	0.587061	0	1.272	1.40094
34.72	36.84	36.435	0.205283	0.55	0.587061	0	1.1509	1.29198
50	25.0699	24.6605	0.205283	0.55	0.587061	0	0.8962	1.07136
57.4	19.0652	18.7068	0.205283	0.55	0.587061	0	0.7657	0.964851
61.95	13.8916	13.6109	0.205283	0.55	0.587061	0	0.6623	0.885032
65.75	3.87659	3.79744	0.205283	0.55	0.587061	0	0.4654	0.749158
68.05	0	0	0.205283	0.55	0.587061	0	0.4793	0.757872
70.05	0	0	0.205283	0.55	0.587061	0.00513207	0.4793	0.757889
72	0.403063	0.394834	0.205283	0.55	0.587061	0.203671	0.4793	0.784762
74.08	0.683142	0.669195	0.205283	0.55	0.587061	0.413203	0.4793	0.863195
75.9	0.843525	0.826303	0.205283	0.55	0.587061	0.595631	0.4793	0.963922

## Sheet: CCl4
EU
DATA MEANS			DATA UNCERTAINTIES			CONTAMINATION	RECONSTRUCTION	TOTAL
			sampling	analytical	data total
Depth	CCl4	grav corr	u(CCl4)	u(CCl4)	u(CCl4)	u(CCl4)	u(CCl4)	u(CCl4)
0	93.25	93.25	0.30684	5.4	5.40871	0	1.3744	5.5806
2.5	93.9	93.8484	0.30684	5.4	5.40871	0	1.3825	5.5826
4.9	92.83	92.668	0.30684	5.4	5.40871	0	1.3935	5.58534
7.55	93.535	93.2427	0.30684	5.4	5.40871	0	1.4098	5.58943
10.1	92.565	92.1507	0.30684	5.4	5.40871	0	1.4301	5.59458
14.8	94.685	94.004	0.30684	5.4	5.40871	0	1.4813	5.60789
19.75	93.6425	92.7161	0.30684	5.4	5.40871	0	1.5546	5.62769
27.54	98.96	97.5467	0.30684	5.4	5.40871	0	1.703	5.67048
34.72	90.765	89.0739	0.30684	5.4	5.40871	0	1.8809	5.72642
42.42	103.153	100.766	0.30684	5.4	5.40871	0	2.1216	5.80993
50	99.25	96.5136	0.30684	5.4	5.40871	0	2.4019	5.91805
54.9	97.495	94.5429	0.30684	5.4	5.40871	0	2.6141	6.0073
57.4	102.993	99.729	0.30684	6.95627	6.96303	0	2.7933	7.50242
59.9	105.86	102.369	0.30684	5.4	5.40871	0	3.0472	6.20803
61.95	103.675	100.148	0.30684	5.4	5.40871	0	3.6653	6.53365
63.85	106.095	102.448	0.30684	5.4	5.40871	0	5.1534	7.47072
65.75	97.18	93.8396	0.30684	5.4	5.40871	0	8.3315	9.93318
68.05	77.97	75.2899	0.30684	5.4	5.40871	0	13.645	14.6779
70.05	59.185	57.1506	0.30684	5.4	5.40871	0.0034065	18.2411	19.0261
72	45.1575	43.6053	0.30684	5.4	5.40871	0.19237	15.0949	16.0358
74.08	33.1525	32.013	0.30684	5.4	5.40871	0.490396	10.9341	12.2086
75.9	25.68	24.7973	0.30684	5.4	5.40871	0.797326	7.269	9.09551
77.75	16.54	15.9715	0.30684	5.4	5.40871	1.18901	3.6872	6.65307

## Sheet: 14CO2
EU
DATA MEANS			DATA UNCERTAINTIES			IN SITU	CONTAMINATION	RECONSTRUCTION	TOTAL
			sampling	analytical	data total
Depth	14CO2 (*1E-12 ppm)	grav	u(14CO2)	u(14CO2)	u(14CO2)	u(14CO2)	u(14CO2)	u(14CO2)	u(14CO2)
0	485.451	485.451	0.556585	3.51156	3.5554	0	0	8.3733	9.09687
14.8	490.274	489.788	0.556585	3.55902	3.60228	0	0	8.5289	9.25843
34.72	491.305	490.031	0.556585	3.52119	3.5649	0	0	8.4007	9.1258
50	491.431	489.529	0.556585	3.4866	3.53074	0	0	8.33	9.04738
59.9	490.981	488.698	0.556585	3.44143	3.48614	0	0	8.2617	8.9671
61.95	489.891	487.539	0.556585	3.42741	3.47231	0	0	8.2047	8.90921
65.75	503.087	500.645	0.556585	3.28407	3.33091	0	0	7.8645	8.5408
68.05	531.448	528.869	0.556585	3.15582	3.20453	0.0388418	0	7.631	8.27663
70.05	546.524	543.872	0.556585	3.07497	3.12494	1.68629	-0.00610739	7.4977	8.29604
72	519.559	517.038	0.556585	3.01498	3.06593	3.19115	-0.136434	7.455	8.67058
74.08	455.794	453.582	0.556585	2.96025	3.01212	4.32135	0.241996	7.5792	9.23308
75.9	407.378	405.401	0.695731	2.94221	3.02335	5.03555	0.921254	7.8381	9.83778

[truncated: 1 more sheets: d15N2]
