# Supplementary material for: Gas transport in firn: multiple-tracer characterisation and model intercomparison for NEEM, Northern Greenland
Source: Copernicus journal article supplement (doi:10.5194/acp-12-4259-2012), 2012-05-14
Supplement: Supplementary file 3 [file NEEM08_dgrav.xls]

## Sheet: d_grav
NEEM 2008 firn air campaign
Gravitational correction
EU borehole (S2)			US borehole (S3)
Depth (m)	d_grav (permil)		Depth(m)	d_grav (permil)
0	0		0	0
2.5	0.0044		2.85	0.005
4.9	0.014		5.23	0.015
7.55	0.0251		9.83	0.035
10.1	0.036		19.3	0.078
14.8	0.058		34.7	0.152
19.75	0.08		49.7	0.226
27.54	0.116		57.47	0.262
34.72	0.152		59.9	0.273
42.42	0.1896		62	0.282
50	0.227		64.03	0.285
54.9	0.25		65.5	0.285
57.4	0.262		66.9	0.285
59.9	0.273		68.3	0.285
61.95	0.282		69.8	0.285
63.85	0.285		71.4	0.285
65.75	0.285		72.85	0.285
68.05	0.285		73.8	0.285
70.05	0.285		75.6	0.285
72	0.285
74.08	0.285
75.9	0.285
77.75	0.285

## Sheet: sampling depths
NEEM 2008 firn air campaign
Sampling depths
S-2 borehole (EU)			S-3 borehole (US)
level	depth (m)		level	depth (m)
0	surface		0	surface
1	2.5		1	2.85
2	4.9		2	5.23
3	7.55		3	9.83
4	10.1		4	19.3
5	14.8		5	34.7
6	19.75		6	49.7
7	27.54		7	57.47
8	34.72		8	59.9
9	42.42		9	62
10	50		10	64.03
11	54.9		11	65.5
12	57.4		12	66.9
13	59.9		13	68.3
14	61.95		14	69.8
15	63.85		15	71.4
16	65.75		16	72.85
17	68.05		17	73.8
18	70.05		18	75.6
19	72
20	74.08
21	75.9
22	77.75
