# Supplementary material for: Gas transport in firn: multiple-tracer characterisation and model intercomparison for NEEM, Northern Greenland
Source: Copernicus journal article supplement (doi:10.5194/acp-12-4259-2012), 2012-05-14
Supplement: Supplementary file 4 [file NEEM_main_core_density.xls]

## Sheet: Sheet1
NEEM main core density
Contact Sigfus Johnsen (sigfus@gfy.ku.dk) for more information
Depth (m)	Density (g cm^-3)
7.7	0.452494
8.25	0.465584
8.8	0.475096
9.35	0.477151
9.9	0.500057
10.45	0.486854
11	0.504509
11.55	0.509075
12.1	0.504737
12.65	0.5125
13.2	0.523078
13.75	0.526122
14.3	0.538945
14.85	0.543929
15.4	0.547582
15.95	0.553137
16.5	0.555002
17.05	0.560747
17.6	0.562954
18.15	0.558388
18.7	0.577185
19.25	0.580686
19.8	0.573761
20.35	0.570793
20.9	0.585176
21.45	0.601347
22	0.596363
22.55	0.601537
23.1	0.597694
23.65	0.591431
24.2	0.609604
24.75	0.611887
25.3	0.611621
25.85	0.621285
26.4	0.601728
26.95	0.626042
27.5	0.627944
28.05	0.630608
28.6	0.625509
29.15	0.644002
29.7	0.634946
30.25	0.649481
30.8	0.640197
31.35	0.651345
31.9	0.653172
32.45	0.656748
33	0.647076
33.55	0.671352
34.1	0.65616
34.65	0.665388
35.2	0.670827
35.75	0.669685
36.3	0.652753
36.85	0.685286
37.4	0.677105
37.95	0.690119
38.5	0.671255
39.05	0.690765
39.6	0.691772
40.15	0.687531
40.7	0.697995
41.25	0.708383
41.8	0.713405
42.35	0.705491
42.9	0.721091
43.45	0.711427
44	0.717401
44.55	0.72482
45.1	0.718656
45.65	0.725886
46.2	0.712112
46.75	0.735322
47.3	0.732507
47.85	0.738861
48.4	0.733458
48.95	0.743503
49.5	0.738557
50.05	0.738062
50.6	0.744492
51.15	0.755565
51.7	0.757353
52.25	0.754195
52.8	0.749401
53.35	0.758533
53.9	0.769225
54.45	0.76367
55	0.77577
55.55	0.778738
56.1	0.767665
56.65	0.771889
57.2	0.772041
57.75	0.773829
58.3	0.778053
58.85	0.777292
59.4	0.78475
59.95	0.781591
60.5	0.798884
61.05	0.780565
61.6	0.792512
62.15	0.782885
62.7	0.793844
63.25	0.806324
63.8	0.794224
64.35	0.796279
64.9	0.798524
65.45	0.809596
66	0.80621
66.55	0.803432
67.1	0.814695
67.65	0.820167
68.2	0.817795
68.75	0.808379
69.3	0.807161
69.85	0.820517
70.4	0.812032
70.95	0.828469
71.5	0.819261
72.05	0.81675
72.6	0.824284
73.15	0.814467
73.7	0.823219
74.25	0.830448
74.8	0.83159
75.35	0.836536
75.9	0.839923
76.45	0.844413
77	0.84875
77.55	0.843081
78.1	0.828774
78.65	0.806058
79.2	0.845174
79.75	0.840569
80.3	0.836917
80.85	0.854077
81.4	0.850082
81.95	0.842282
82.5	0.840341
83.05	0.852784
83.6	0.844793
84.15	0.8634
84.7	0.860013
85.25	0.857616
85.8	0.828393
86.35	0.869602
86.9	0.852289
87.45	0.855143
88	0.816217
88.55	0.840836
89.1	0.856132
89.65	0.861954
90.2	0.850767
90.75	0.862106
91.3	0.86241
91.85	0.856931
92.4	0.86671
92.95	0.864541
93.5	0.86846
94.05	0.867852
94.6	0.87238
95.15	0.858834
95.7	0.875576
96.25	0.857121
96.8	0.864155
97.35	0.853886
97.9	0.874891
98.45	0.863209
99	0.888931
99.55	0.87432
100.1	0.866368
100.65	0.878468
101.2	0.871733
101.75	0.881892
102.3	0.84856
102.85	0.865416
103.4	0.880903
103.95	0.868993
104.5	0.878125
105.05	0.874548
105.6	0.877579
