# Supplementary material for: Gas transport in firn: multiple-tracer characterisation and model intercomparison for NEEM, Northern Greenland
Source: Copernicus journal article supplement (doi:10.5194/acp-12-4259-2012), 2012-05-14
Supplement: Supplementary file 5 [file NEEM08_EU_CIC.xls]

## Sheet: Diffusivity
depth	Molec diff	Dispersive mixing	Convective mixing
0	1.63895e-05	0	2.30453e-05
0.2	1.63895e-05	0	2.20435e-05
0.4	1.63895e-05	0	2.10852e-05
0.6	1.63895e-05	0	2.01686e-05
0.8	1.63895e-05	0	1.92919e-05
1	1.63895e-05	0	1.84532e-05
1.2	1.63895e-05	0	1.7651e-05
1.4	1.63895e-05	0	1.68837e-05
1.6	1.63895e-05	0	1.61498e-05
1.8	1.63895e-05	0	1.54477e-05
2	1.63895e-05	0	1.47762e-05
2.2	1.63895e-05	0	1.41339e-05
2.4	1.63895e-05	0	1.35194e-05
2.6	1.63895e-05	0	1.29317e-05
2.8	1.63895e-05	0	1.23696e-05
3	1.63895e-05	0	1.18319e-05
3.2	1.63895e-05	0	1.13175e-05
3.4	1.63895e-05	0	1.08255e-05
3.6	1.63895e-05	0	1.03549e-05
3.8	1.63895e-05	0	9.90478e-06
4	1.63895e-05	0	9.47421e-06
4.2	1.63895e-05	0	9.06235e-06
4.4	1.63895e-05	0	8.6684e-06
4.6	1.63895e-05	0	8.29157e-06
4.8	1.63895e-05	0	7.93113e-06
5	1.63895e-05	0	7.58635e-06
5.2	1.63895e-05	0	7.25656e-06
5.4	1.63895e-05	0	6.94111e-06
5.6	1.63895e-05	0	6.63937e-06
5.8	1.63895e-05	0	6.35075e-06
6	1.63895e-05	0	6.07468e-06
6.2	1.63895e-05	0	5.8106e-06
6.4	1.63895e-05	0	5.55801e-06
6.6	1.63895e-05	0	5.31639e-06
6.8	1.63895e-05	0	5.08528e-06
7	1.63895e-05	0	4.86422e-06
7.2	1.63895e-05	0	4.65277e-06
7.4	1.63895e-05	0	4.4505e-06
7.6	1.63895e-05	0	4.25704e-06
7.8	1.63895e-05	0	4.07198e-06
8	1.63895e-05	0	3.89496e-06
8.2	1.63895e-05	0	3.72564e-06
8.4	1.63895e-05	0	3.56369e-06
8.6	1.63895e-05	0	3.40877e-06
8.8	1.63895e-05	0	3.26058e-06
9	1.63895e-05	0	3.11884e-06
9.2	1.63895e-05	0	2.98326e-06
9.4	1.62878e-05	0	2.85358e-06
9.6	1.60594e-05	0	2.72953e-06
9.8	1.58329e-05	0	2.61087e-06
10	1.56084e-05	0	2.49737e-06
10.2	1.53859e-05	0	2.38881e-06
10.4	1.51654e-05	0	2.28497e-06
10.6	1.4947e-05	0	2.18563e-06
10.8	1.47306e-05	0	2.09062e-06
11	1.45165e-05	0	1.99974e-06
11.2	1.43045e-05	0	1.91281e-06
11.4	1.40949e-05	0	1.82966e-06
11.6	1.38876e-05	0	1.75012e-06
11.8	1.36829e-05	0	1.67404e-06
12	1.34806e-05	0	1.60127e-06
12.2	1.32811e-05	0	1.53166e-06
12.4	1.30844e-05	0	1.46507e-06
12.6	1.28906e-05	0	1.40139e-06
12.8	1.26998e-05	0	1.34047e-06
13	1.25122e-05	0	1.28219e-06
13.2	1.23279e-05	0	1.22646e-06
13.4	1.2147e-05	0	1.17314e-06
13.6	1.19697e-05	0	1.12214e-06
13.8	1.1796e-05	0	1.07336e-06
14	1.16261e-05	0	1.0267e-06
14.2	1.146e-05	0	9.82069e-07
14.4	1.12979e-05	0	9.39377e-07
14.6	1.11398e-05	0	8.98541e-07
14.8	1.09857e-05	0	8.59481e-07
15	1.08356e-05	0	8.22118e-07
15.2	1.06896e-05	0	7.86379e-07
15.4	1.05476e-05	0	7.52194e-07
15.6	1.04096e-05	0	7.19496e-07
15.8	1.02755e-05	0	6.88218e-07
16	1.01453e-05	0	6.58301e-07
16.2	1.00189e-05	0	6.29683e-07
16.4	9.89615e-06	0	6.0231e-07
16.6	9.77702e-06	0	5.76127e-07
16.8	9.66139e-06	0	5.51082e-07
17	9.54916e-06	0	5.27126e-07
17.2	9.44022e-06	0	5.04211e-07
17.4	9.33447e-06	0	4.82292e-07
17.6	9.23183e-06	0	4.61326e-07
17.8	9.1322e-06	0	4.41272e-07
18	9.03552e-06	0	4.22089e-07
18.2	8.94173e-06	0	4.03741e-07
18.4	8.85076e-06	0	3.8619e-07
18.6	8.76259e-06	0	3.69401e-07
18.8	8.67718e-06	0	3.53343e-07
19	8.59451e-06	0	3.37983e-07
19.2	8.51456e-06	0	3.2329e-07
19.4	8.43733e-06	0	3.09236e-07
19.6	8.36281e-06	0	2.95793e-07
19.8	8.291e-06	0	2.82935e-07
20	8.22192e-06	0	2.70635e-07
20.2	8.15557e-06	0	2.58871e-07
20.4	8.09196e-06	0	2.47617e-07
20.6	8.03111e-06	0	2.36853e-07
20.8	7.97302e-06	0	2.26557e-07
21	7.91769e-06	0	2.16708e-07
21.2	7.86513e-06	0	2.07287e-07
21.4	7.81533e-06	0	1.98276e-07
21.6	7.76828e-06	0	1.89657e-07
21.8	7.72397e-06	0	1.81412e-07
22	7.68236e-06	0	1.73526e-07
22.2	7.64343e-06	0	1.65983e-07
22.4	7.60713e-06	0	1.58767e-07
22.6	7.57342e-06	0	1.51865e-07
22.8	7.54223e-06	0	1.45264e-07
23	7.51349e-06	0	1.38949e-07
23.2	7.48713e-06	0	1.32909e-07
23.4	7.46305e-06	0	1.27131e-07
23.6	7.44115e-06	0	1.21604e-07
23.8	7.42133e-06	0	1.16318e-07
24	7.40345e-06	0	1.11262e-07
24.2	7.3874e-06	0	1.06425e-07
24.4	7.37304e-06	0	1.01798e-07
24.6	7.36022e-06	0	9.73731e-08
24.8	7.34879e-06	0	9.31402e-08
25	7.33859e-06	0	8.90913e-08
25.2	7.32946e-06	0	8.52184e-08
25.4	7.32125e-06	0	8.15138e-08
25.6	7.31377e-06	0	7.79703e-08
25.8	7.30686e-06	0	7.45809e-08
26	7.30036e-06	0	7.13387e-08
26.2	7.29409e-06	0	6.82375e-08
26.4	7.2879e-06	0	6.52712e-08
26.6	7.28161e-06	0	6.24338e-08
26.8	7.27508e-06	0	5.97197e-08
27	7.26816e-06	0	5.71236e-08
27.2	7.26069e-06	0	5.46404e-08
27.4	7.25255e-06	0	5.22651e-08
27.6	7.24359e-06	0	4.9993e-08
27.8	7.23369e-06	0	4.78198e-08
28	7.22274e-06	0	4.5741e-08
28.2	7.21063e-06	0	4.37526e-08
28.4	7.19726e-06	0	4.18506e-08
28.6	7.18252e-06	0	4.00313e-08
28.8	7.16634e-06	0	3.82911e-08
29	7.14864e-06	0	3.66265e-08
29.2	7.12933e-06	0	3.50343e-08
29.4	7.10835e-06	0	3.35113e-08
29.6	7.08564e-06	0	3.20546e-08
29.8	7.06113e-06	0	3.06611e-08
30	7.03479e-06	0	2.93282e-08
30.2	7.00656e-06	0	2.80533e-08
30.4	6.9764e-06	0	2.68338e-08
30.6	6.94427e-06	0	2.56673e-08
30.8	6.91016e-06	0	2.45515e-08
31	6.87403e-06	0	2.34842e-08
31.2	6.83587e-06	0	2.24633e-08
31.4	6.79569e-06	0	2.14868e-08
31.6	6.75348e-06	0	2.05528e-08
31.8	6.70927e-06	0	1.96593e-08
32	6.66307e-06	0	1.88047e-08
32.2	6.61495e-06	0	1.79872e-08
32.4	6.56494e-06	0	1.72053e-08
32.6	6.51313e-06	0	1.64574e-08
32.8	6.45959e-06	0	1.57419e-08
33	6.40445e-06	0	1.50576e-08
33.2	6.3478e-06	0	1.4403e-08
33.4	6.28978e-06	0	1.37769e-08
33.6	6.23055e-06	0	1.3178e-08
33.8	6.17026e-06	0	1.26052e-08
34	6.10908e-06	0	1.20572e-08
34.2	6.04719e-06	0	1.15331e-08
34.4	5.98477e-06	0	1.10317e-08
34.6	5.92201e-06	0	1.05521e-08
34.8	5.85909e-06	0	1.00934e-08
35	5.7962e-06	0	9.65465e-09
35.2	5.73352e-06	0	9.23495e-09
35.4	5.67121e-06	0	8.83349e-09
35.6	5.60942e-06	0	8.44949e-09
35.8	5.54829e-06	0	8.08218e-09
36	5.48794e-06	0	7.73084e-09
36.2	5.42846e-06	0	7.39477e-09
36.4	5.36995e-06	0	7.07331e-09
36.6	5.31245e-06	0	6.76582e-09
36.8	5.256e-06	0	6.4717e-09
37	5.20062e-06	0	6.19037e-09
37.2	5.14629e-06	0	5.92127e-09
37.4	5.093e-06	0	5.66386e-09
37.6	5.0407e-06	0	5.41765e-09
37.8	4.98934e-06	0	5.18213e-09
38	4.93886e-06	0	4.95686e-09
38.2	4.8892e-06	0	4.74138e-09
38.4	4.84028e-06	0	4.53527e-09
38.6	4.79204e-06	0	4.33811e-09
38.8	4.7444e-06	0	4.14953e-09
39	4.69733e-06	0	3.96914e-09
39.2	4.65076e-06	0	3.7966e-09
39.4	4.60468e-06	0	3.63156e-09
39.6	4.55907e-06	0	3.47369e-09
39.8	4.51392e-06	0	3.32268e-09
40	4.46927e-06	0	3.17824e-09
40.2	4.42514e-06	0	3.04008e-09
40.4	4.38158e-06	0	2.90792e-09
40.6	4.33867e-06	0	2.78151e-09
40.8	4.29648e-06	0	2.6606e-09
41	4.25509e-06	0	2.54494e-09
41.2	4.2146e-06	0	2.43431e-09
41.4	4.1751e-06	0	2.32848e-09
41.6	4.13667e-06	0	2.22726e-09
41.8	4.0994e-06	0	2.13044e-09
42	4.06336e-06	0	2.03783e-09
42.2	4.02861e-06	0	1.94924e-09
42.4	3.99518e-06	0	1.8645e-09
42.6	3.96309e-06	0	1.78345e-09
42.8	3.93234e-06	0	1.70592e-09
43	3.90288e-06	0	1.63176e-09
43.2	3.87467e-06	0	1.56083e-09
43.4	3.84761e-06	0	1.49298e-09
43.6	3.8216e-06	0	1.42808e-09
43.8	3.79651e-06	0	1.366e-09
44	3.77217e-06	0	1.30661e-09
44.2	3.74842e-06	0	1.24981e-09
44.4	3.72506e-06	0	1.19548e-09
44.6	3.7019e-06	0	1.14351e-09
44.8	3.67872e-06	0	1.0938e-09
45	3.65531e-06	0	1.04626e-09
45.2	3.63148e-06	0	1.00077e-09
45.4	3.60701e-06	0	9.57268e-10
45.6	3.58171e-06	0	9.15654e-10
45.8	3.5554e-06	0	8.7585e-10
46	3.52793e-06	0	8.37776e-10
46.2	3.49915e-06	0	8.01356e-10
46.4	3.46894e-06	0	7.6652e-10
46.6	3.43721e-06	0	7.33199e-10
46.8	3.4039e-06	0	7.01326e-10
47	3.36895e-06	0	6.70838e-10
47.2	3.33234e-06	0	6.41676e-10
47.4	3.29408e-06	0	6.13782e-10
47.6	3.25419e-06	0	5.871e-10
47.8	3.21271e-06	0	5.61578e-10
48	3.16971e-06	0	5.37165e-10
48.2	3.12526e-06	0	5.13814e-10
48.4	3.07944e-06	0	4.91478e-10
48.6	3.03237e-06	0	4.70113e-10
48.8	2.98413e-06	0	4.49676e-10
49	2.93484e-06	0	4.30128e-10
49.2	2.88462e-06	0	4.1143e-10
49.4	2.83357e-06	0	3.93545e-10
49.6	2.78182e-06	0	3.76437e-10
49.8	2.72946e-06	0	3.60073e-10
50	2.67663e-06	0	3.4442e-10
50.2	2.62342e-06	0	3.29447e-10
50.4	2.56993e-06	0	3.15126e-10
50.6	2.51628e-06	0	3.01427e-10
50.8	2.46256e-06	0	2.88324e-10
51	2.40887e-06	0	2.7579e-10
51.2	2.35531e-06	0	2.63801e-10
51.4	2.30197e-06	0	2.52333e-10
51.6	2.24892e-06	0	2.41364e-10
51.8	2.19627e-06	0	2.30872e-10
52	2.14409e-06	0	2.20835e-10
52.2	2.09245e-06	0	2.11235e-10
52.4	2.04142e-06	0	2.02053e-10
52.6	1.99105e-06	0	1.93269e-10
52.8	1.9414e-06	0	1.84867e-10
53	1.89251e-06	0	1.76831e-10
53.2	1.84439e-06	0	1.69144e-10
53.4	1.79707e-06	0	1.61791e-10
53.6	1.75054e-06	0	1.54758e-10
53.8	1.70479e-06	0	1.4803e-10
54	1.65977e-06	0	1.41595e-10
54.2	1.61546e-06	0	1.3544e-10
54.4	1.57179e-06	0	1.29552e-10
54.6	1.52868e-06	0	1.2392e-10
54.8	1.48605e-06	0	1.18533e-10
55	1.44381e-06	0	0
55.2	1.40185e-06	0	0
55.4	1.36006e-06	0	0
55.6	1.31833e-06	0	0
55.8	1.27654e-06	0	0
56	1.23458e-06	0	0
56.2	1.19235e-06	0	0
56.4	1.14975e-06	0	0
56.6	1.10669e-06	0	0
56.8	1.06309e-06	0	0
57	1.01891e-06	0	0
57.2	9.74107e-07	0	0
57.4	9.28666e-07	0	0
57.6	8.82608e-07	0	0
57.8	8.35989e-07	0	0
58	7.88899e-07	0	0
58.2	7.41465e-07	0	0
58.4	6.93846e-07	9.78306e-19	0
58.6	6.46231e-07	7.29061e-17	0
58.8	5.98838e-07	2.25441e-15	0
59	5.51906e-07	3.79084e-14	0
59.2	5.05692e-07	3.8547e-13	0
59.4	4.60466e-07	2.52815e-12	0
59.6	4.16505e-07	1.12948e-11	0
59.8	3.74085e-07	3.63509e-11	0
60	3.33476e-07	8.93819e-11	0
60.2	2.94938e-07	1.77611e-10	0
60.4	2.58712e-07	2.99657e-10	0
60.6	2.25034e-07	4.48704e-10	0
60.8	1.94121e-07	6.1899e-10	0
61	1.6606e-07	8.0806e-10	0
61.2	1.40922e-07	1.01504e-09	0
61.4	1.18583e-07	1.23772e-09	0
61.6	9.89533e-08	1.47211e-09	0
61.8	8.19085e-08	1.71322e-09	0
62	6.72884e-08	1.95565e-09	0
62.2	5.50911e-08	2.19347e-09	0
62.4	4.51047e-08	2.42067e-09	0
62.6	3.69286e-08	2.63095e-09	0
62.8	3.02346e-08	2.81759e-09	0
63	2.4754e-08	2.97451e-09	0
63.2	2.02669e-08	3.09716e-09	0
63.4	1.65931e-08	3.18235e-09	0
63.6	1.35853e-08	3.22832e-09	0
63.8	1.11227e-08	3.23525e-09	0
64	9.10649e-09	3.2058e-09	0
64.2	7.45576e-09	3.14458e-09	0
64.4	6.10426e-09	3.05719e-09	0
64.6	4.99775e-09	2.94962e-09	0
64.8	4.09181e-09	2.82748e-09	0
65	3.35009e-09	2.6963e-09	0
65.2	2.74282e-09	2.56152e-09	0
65.4	2.24563e-09	2.4279e-09	0
65.6	1.83857e-09	2.29941e-09	0
65.8	1.50529e-09	2.17916e-09	0
66	1.23243e-09	2.06941e-09	0
66.2	1.00903e-09	1.9716e-09	0
66.4	8.26122e-10	1.88646e-09	0
66.6	6.76372e-10	1.81413e-09	0
66.8	5.53766e-10	1.75424e-09	0
67	4.53386e-10	1.70605e-09	0
67.2	3.71201e-10	1.66851e-09	0
67.4	3.03913e-10	1.64036e-09	0
67.6	2.48823e-10	1.62018e-09	0
67.8	2.03719e-10	1.60646e-09	0
68	1.66791e-10	1.59763e-09	0
68.2	1.36557e-10	1.59217e-09	0
68.4	1.11803e-10	1.58862e-09	0
68.6	9.1537e-11	1.58566e-09	0
68.8	7.49441e-11	1.5822e-09	0
69	6.13591e-11	1.57739e-09	0
69.2	5.02365e-11	1.57068e-09	0
69.4	4.11302e-11	1.56185e-09	0
69.6	3.36746e-11	1.55102e-09	0
69.8	2.75704e-11	1.53863e-09	0
70	2.25727e-11	1.52539e-09	0
70.2	1.85927e-11	1.51228e-09	0
70.4	1.53294e-11	1.50045e-09	0
70.6	1.26391e-11	1.49118e-09	0
70.8	1.04204e-11	1.48578e-09	0
71	8.59004e-12	1.48559e-09	0
71.2	7.07996e-12	1.49185e-09	0
71.4	6.03429e-12	1.50565e-09	0
71.6	5.2319e-12	1.52791e-09	0
71.8	4.54716e-12	1.55925e-09	0
72	3.95896e-12	1.59993e-09	0
72.2	3.45083e-12	1.64977e-09	0
72.4	3.00979e-12	1.70804e-09	0
72.6	2.62554e-12	1.77336e-09	0
72.8	2.28981e-12	1.84366e-09	0
73	1.99586e-12	1.91615e-09	0
73.2	1.73815e-12	1.98735e-09	0
73.4	1.51206e-12	2.05329e-09	0
73.6	1.31368e-12	2.10973e-09	0
73.8	1.13968e-12	2.15251e-09	0
74	9.87152e-13	2.17792e-09	0
74.2	8.53591e-13	2.18311e-09	0
74.4	7.36783e-13	2.16635e-09	0
74.6	6.34773e-13	2.12718e-09	0
74.8	5.45832e-13	2.06642e-09	0
75	4.6842e-13	1.98596e-09	0
75.2	4.01168e-13	1.88851e-09	0
75.4	3.42857e-13	1.77725e-09	0
75.6	2.92402e-13	1.65561e-09	0
75.8	2.48839e-13	1.52707e-09	0
76	2.11308e-13	1.39508e-09	0
76.2	1.79049e-13	1.26296e-09	0
76.4	1.51385e-13	1.13383e-09	0
76.6	1.27719e-13	1.01056e-09	0
76.8	1.07523e-13	8.95611e-10	0
77	9.03302e-14	7.90933e-10	0
77.2	7.57304e-14	6.97805e-10	0
77.4	6.33633e-14	6.16783e-10	0
77.6	5.29134e-14	5.47752e-10	0
77.8	4.41049e-14	4.90044e-10	0
78	3.66979e-14	4.42611e-10	0
78.2	3.04836e-14	4.04189e-10	0
78.4	2.52818e-14	4e-10	0
78.6	2.09368e-14	4e-10	0
78.8	1.7315e-14	4e-10	0
79	1.43017e-14	4e-10	0

## Sheet: profiles
depth	CO2	CH4	SF6	CFC_11	CFC_12	CFC_113	HFC_134a	CH3CCl3	14CO2	d15N2	CCl4
0	382.39	1837.16	6.647	245.83	536.85	78.122	52.82	11.3318	487.221	1	91.67
0.2	382.602	1837.62	6.64489	245.853	536.874	78.1304	52.7691	11.3632	487.507	1	91.6836
0.4	382.766	1837.94	6.64341	245.869	536.889	78.1359	52.7297	11.3894	487.729	1	91.6935
0.6	382.894	1838.2	6.64183	245.884	536.901	78.1409	52.6923	11.4158	487.908	1	91.7032
0.8	383.005	1838.43	6.64015	245.899	536.914	78.1458	52.6565	11.4427	488.063	1	91.7126
1	383.108	1838.66	6.6384	245.915	536.927	78.1508	52.6212	11.4703	488.209	1	91.7222
1.2	383.211	1838.9	6.63659	245.931	536.941	78.1559	52.5855	11.4988	488.351	1	91.7319
1.4	383.314	1839.13	6.63473	245.948	536.954	78.1611	52.5492	11.5282	488.493	1	91.7418
1.6	383.418	1839.37	6.63282	245.965	536.968	78.1664	52.5119	11.5584	488.636	1	91.752
1.8	383.522	1839.61	6.63085	245.982	536.982	78.1718	52.4738	11.5896	488.779	1	91.7625
2	383.627	1839.86	6.62882	246	536.996	78.1773	52.4349	11.6217	488.924	1.00001	91.7732
2.2	383.733	1840.1	6.62674	246.018	537.011	78.1829	52.3952	11.6547	489.069	1.00001	91.7841
2.4	383.838	1840.35	6.62461	246.036	537.025	78.1885	52.3549	11.6887	489.214	1.00001	91.7953
2.6	383.943	1840.59	6.62241	246.055	537.04	78.1943	52.3138	11.7236	489.36	1.00001	91.8067
2.8	384.048	1840.84	6.62015	246.074	537.055	78.2001	52.2721	11.7594	489.505	1.00001	91.8184
3	384.152	1841.09	6.61784	246.093	537.07	78.206	52.2297	11.7962	489.65	1.00001	91.8303
3.2	384.255	1841.34	6.61546	246.113	537.085	78.212	52.1866	11.8341	489.793	1.00001	91.8424
3.4	384.358	1841.58	6.61303	246.134	537.101	78.2181	52.1429	11.8729	489.936	1.00001	91.8547
3.6	384.46	1841.83	6.61053	246.154	537.116	78.2243	52.0985	11.9126	490.078	1.00001	91.8673
3.8	384.561	1842.08	6.60798	246.175	537.132	78.2305	52.0536	11.9534	490.219	1.00001	91.88
4	384.662	1842.33	6.60536	246.196	537.147	78.2368	52.008	11.9952	490.359	1.00001	91.893
4.2	384.761	1842.58	6.60268	246.218	537.163	78.2431	51.9618	12.0381	490.497	1.00001	91.9063
4.4	384.859	1842.82	6.59994	246.24	537.179	78.2496	51.915	12.0819	490.634	1.00001	91.9197
4.6	384.956	1843.07	6.59714	246.262	537.195	78.256	51.8676	12.1268	490.769	1.00001	91.9334
4.8	385.051	1843.31	6.59428	246.285	537.211	78.2626	51.8196	12.1727	490.903	1.00001	91.9473
5	385.145	1843.56	6.59136	246.308	537.227	78.2691	51.7711	12.2196	491.035	1.00001	91.9614
5.2	385.238	1843.8	6.58837	246.331	537.243	78.2758	51.722	12.2676	491.165	1.00002	91.9757
5.4	385.329	1844.05	6.58533	246.355	537.259	78.2824	51.6724	12.3166	491.294	1.00002	91.9902
5.6	385.419	1844.29	6.58223	246.379	537.275	78.2891	51.6223	12.3666	491.42	1.00002	92.0049
5.8	385.507	1844.53	6.57907	246.403	537.291	78.2959	51.5717	12.4177	491.545	1.00002	92.0198
6	385.593	1844.77	6.57585	246.427	537.307	78.3027	51.5205	12.4698	491.667	1.00002	92.0349
6.2	385.678	1845	6.57257	246.452	537.323	78.3095	51.4689	12.523	491.787	1.00002	92.0502
6.4	385.761	1845.24	6.56923	246.477	537.338	78.3163	51.4168	12.5771	491.905	1.00002	92.0657
6.6	385.842	1845.47	6.56584	246.502	537.354	78.3231	51.3643	12.6323	492.021	1.00002	92.0814
6.8	385.921	1845.7	6.56239	246.528	537.37	78.33	51.3113	12.6886	492.134	1.00002	92.0972
7	385.998	1845.93	6.55889	246.553	537.386	78.3369	51.2579	12.7458	492.245	1.00002	92.1133
7.2	386.073	1846.16	6.55533	246.579	537.401	78.3437	51.2041	12.8041	492.353	1.00002	92.1295
7.4	386.147	1846.38	6.55171	246.605	537.417	78.3506	51.1499	12.8633	492.459	1.00002	92.1458
7.6	386.218	1846.6	6.54805	246.632	537.432	78.3575	51.0953	12.9236	492.562	1.00002	92.1624
7.8	386.287	1846.83	6.54433	246.658	537.447	78.3644	51.0403	12.9848	492.663	1.00003	92.179
8	386.353	1847.04	6.54056	246.685	537.462	78.3712	50.9849	13.047	492.761	1.00003	92.1959
8.2	386.418	1847.26	6.53674	246.712	537.477	78.3781	50.9292	13.1102	492.856	1.00003	92.2129
8.4	386.481	1847.47	6.53287	246.739	537.492	78.3849	50.8731	13.1744	492.949	1.00003	92.23
8.6	386.541	1847.68	6.52895	246.766	537.506	78.3917	50.8167	13.2395	493.039	1.00003	92.2473
8.8	386.599	1847.89	6.52499	246.793	537.521	78.3985	50.76	13.3055	493.126	1.00003	92.2647
9	386.655	1848.09	6.52098	246.821	537.535	78.4053	50.703	13.3725	493.211	1.00003	92.2822
9.2	386.708	1848.29	6.51692	246.848	537.549	78.412	50.6456	13.4404	493.292	1.00003	92.2999
9.4	386.76	1848.49	6.51282	246.876	537.562	78.4187	50.5878	13.5094	493.372	1.00003	92.3178
9.6	386.81	1848.69	6.50863	246.904	537.576	78.4254	50.5293	13.5798	493.449	1.00003	92.3358
9.8	386.858	1848.88	6.50436	246.932	537.589	78.4321	50.4699	13.6518	493.524	1.00003	92.3542
10	386.904	1849.08	6.5	246.961	537.603	78.4389	50.4094	13.7256	493.597	1.00003	92.373
10.2	386.948	1849.28	6.49555	246.99	537.616	78.4457	50.348	13.8011	493.668	1.00004	92.392
10.4	386.991	1849.47	6.49101	247.02	537.629	78.4525	50.2856	13.8783	493.738	1.00004	92.4113
10.6	387.031	1849.66	6.48637	247.05	537.642	78.4593	50.2221	13.9574	493.805	1.00004	92.431
10.8	387.07	1849.86	6.48164	247.08	537.655	78.4662	50.1576	14.0382	493.87	1.00004	92.451
11	387.107	1850.05	6.47681	247.111	537.667	78.473	50.092	14.121	493.933	1.00004	92.4714
11.2	387.142	1850.24	6.47189	247.142	537.68	78.4799	50.0253	14.2056	493.994	1.00004	92.4921
11.4	387.174	1850.43	6.46686	247.174	537.692	78.4868	49.9575	14.2922	494.053	1.00004	92.5132
11.6	387.205	1850.62	6.46174	247.206	537.704	78.4937	49.8885	14.3808	494.11	1.00004	92.5346
11.8	387.234	1850.8	6.45651	247.238	537.716	78.5006	49.8184	14.4714	494.164	1.00004	92.5564
12	387.26	1850.99	6.45119	247.271	537.727	78.5076	49.7471	14.5641	494.216	1.00004	92.5785
12.2	387.284	1851.17	6.44576	247.304	537.738	78.5145	49.6745	14.6588	494.266	1.00004	92.6011
12.4	387.306	1851.36	6.44022	247.338	537.749	78.5214	49.6007	14.7557	494.314	1.00004	92.624
12.6	387.326	1851.54	6.43458	247.372	537.76	78.5283	49.5257	14.8548	494.359	1.00005	92.6473
12.8	387.344	1851.72	6.42883	247.406	537.771	78.5353	49.4494	14.956	494.402	1.00005	92.671
13	387.359	1851.9	6.42298	247.441	537.781	78.5422	49.3718	15.0595	494.442	1.00005	92.695
13.2	387.372	1852.07	6.41701	247.476	537.791	78.5491	49.2928	15.1653	494.481	1.00005	92.7195
13.4	387.382	1852.24	6.41094	247.512	537.8	78.556	49.2125	15.2733	494.517	1.00005	92.7444
13.6	387.391	1852.42	6.40477	247.548	537.809	78.5629	49.1309	15.3836	494.55	1.00005	92.7697
13.8	387.396	1852.59	6.39848	247.585	537.818	78.5698	49.0478	15.4963	494.581	1.00005	92.7953
14	387.4	1852.75	6.39208	247.622	537.827	78.5767	48.9634	15.6114	494.61	1.00005	92.8214
14.2	387.401	1852.92	6.38558	247.659	537.835	78.5835	48.8776	15.7288	494.636	1.00005	92.8479
14.4	387.399	1853.08	6.37897	247.697	537.842	78.5903	48.7904	15.8485	494.66	1.00005	92.8748
14.6	387.395	1853.24	6.37225	247.735	537.85	78.5971	48.7018	15.9707	494.682	1.00005	92.9021
14.8	387.389	1853.4	6.36542	247.773	537.856	78.6038	48.6118	16.0953	494.701	1.00006	92.9298
15	387.38	1853.55	6.35849	247.812	537.863	78.6105	48.5204	16.2222	494.718	1.00006	92.9579
15.2	387.369	1853.7	6.35146	247.851	537.868	78.6172	48.4276	16.3515	494.732	1.00006	92.9864
15.4	387.356	1853.85	6.34433	247.891	537.874	78.6238	48.3334	16.4832	494.745	1.00006	93.0153
15.6	387.339	1854	6.3371	247.93	537.878	78.6304	48.2379	16.6171	494.754	1.00006	93.0445
15.8	387.321	1854.14	6.32977	247.97	537.883	78.6369	48.141	16.7534	494.762	1.00006	93.0741
16	387.3	1854.28	6.32236	248.011	537.887	78.6433	48.0428	16.892	494.767	1.00006	93.1041
16.2	387.277	1854.42	6.31485	248.051	537.89	78.6497	47.9433	17.0328	494.77	1.00006	93.1344
16.4	387.251	1854.55	6.30725	248.092	537.892	78.656	47.8426	17.1758	494.771	1.00006	93.165
16.6	387.224	1854.68	6.29957	248.133	537.894	78.6623	47.7405	17.321	494.77	1.00006	93.196
16.8	387.194	1854.8	6.29181	248.174	537.896	78.6684	47.6372	17.4684	494.767	1.00006	93.2273
17	387.161	1854.92	6.28396	248.216	537.897	78.6745	47.5327	17.618	494.761	1.00007	93.2589
17.2	387.127	1855.04	6.27602	248.258	537.897	78.6805	47.4268	17.7697	494.754	1.00007	93.2909
17.4	387.09	1855.15	6.26801	248.299	537.897	78.6864	47.3198	17.9237	494.744	1.00007	93.3231
17.6	387.051	1855.26	6.25992	248.341	537.896	78.6922	47.2115	18.0797	494.733	1.00007	93.3557
17.8	387.01	1855.37	6.25176	248.384	537.894	78.698	47.102	18.2379	494.72	1.00007	93.3886
18	386.967	1855.47	6.24352	248.426	537.892	78.7036	46.9913	18.3982	494.705	1.00007	93.4217
18.2	386.923	1855.57	6.23521	248.468	537.889	78.7091	46.8794	18.5606	494.688	1.00007	93.4551
18.4	386.876	1855.66	6.22682	248.511	537.886	78.7145	46.7663	18.7251	494.67	1.00007	93.4888
18.6	386.827	1855.75	6.21837	248.554	537.882	78.7199	46.652	18.8916	494.65	1.00007	93.5228
18.8	386.776	1855.84	6.20985	248.597	537.877	78.7251	46.5366	19.0601	494.628	1.00007	93.557
19	386.724	1855.92	6.20126	248.64	537.871	78.7302	46.4201	19.2306	494.605	1.00007	93.5915
19.2	386.67	1856	6.19262	248.683	537.865	78.7352	46.3025	19.4031	494.58	1.00008	93.6262
19.4	386.614	1856.07	6.18391	248.726	537.858	78.7401	46.1838	19.5775	494.554	1.00008	93.6612
19.6	386.557	1856.14	6.17514	248.769	537.851	78.7448	46.0641	19.7538	494.527	1.00008	93.6964
19.8	386.498	1856.2	6.16632	248.812	537.842	78.7495	45.9433	19.932	494.498	1.00008	93.7318
20	386.437	1856.27	6.15744	248.855	537.833	78.754	45.8216	20.112	494.469	1.00008	93.7674
20.2	386.375	1856.32	6.14852	248.899	537.824	78.7584	45.6989	20.2937	494.438	1.00008	93.8032
20.4	386.312	1856.38	6.13955	248.942	537.813	78.7626	45.5752	20.4772	494.406	1.00008	93.8391
20.6	386.247	1856.43	6.13053	248.985	537.802	78.7667	45.4507	20.6624	494.372	1.00008	93.8753
20.8	386.182	1856.47	6.12147	249.029	537.791	78.7707	45.3253	20.8491	494.338	1.00008	93.9115
21	386.115	1856.52	6.11237	249.072	537.778	78.7746	45.1992	21.0375	494.304	1.00008	93.9479
21.2	386.047	1856.55	6.10324	249.115	537.765	78.7783	45.0722	21.2273	494.268	1.00009	93.9845
21.4	385.978	1856.59	6.09407	249.158	537.751	78.7819	44.9445	21.4187	494.231	1.00009	94.0211
21.6	385.908	1856.62	6.08488	249.201	537.737	78.7853	44.8162	21.6113	494.194	1.00009	94.0579
21.8	385.837	1856.65	6.07566	249.244	537.722	78.7886	44.6873	21.8053	494.156	1.00009	94.0947
22	385.765	1856.67	6.06642	249.287	537.706	78.7917	44.5577	22.0006	494.118	1.00009	94.1316
22.2	385.692	1856.69	6.05716	249.33	537.689	78.7947	44.4277	22.197	494.079	1.00009	94.1686
22.4	385.619	1856.71	6.04788	249.372	537.672	78.7975	44.2972	22.3945	494.039	1.00009	94.2055
22.6	385.545	1856.72	6.0386	249.415	537.654	78.8002	44.1662	22.5931	493.999	1.00009	94.2425
22.8	385.471	1856.73	6.0293	249.457	537.636	78.8028	44.0349	22.7926	493.959	1.00009	94.2795
23	385.396	1856.74	6.02	249.499	537.617	78.8051	43.9033	22.993	493.919	1.00009	94.3165
23.2	385.321	1856.74	6.0107	249.541	537.597	78.8073	43.7714	23.1942	493.878	1.00009	94.3535
23.4	385.246	1856.74	6.00141	249.582	537.577	78.8094	43.6393	23.3962	493.837	1.0001	94.3904
23.6	385.17	1856.74	5.99211	249.624	537.556	78.8113	43.5071	23.5988	493.796	1.0001	94.4273
23.8	385.094	1856.73	5.98283	249.665	537.534	78.813	43.3747	23.802	493.754	1.0001	94.4641
24	385.017	1856.72	5.97356	249.706	537.512	78.8146	43.2423	24.0057	493.713	1.0001	94.5008
24.2	384.941	1856.71	5.9643	249.746	537.489	78.816	43.1099	24.2099	493.672	1.0001	94.5375
24.4	384.865	1856.69	5.95506	249.787	537.466	78.8173	42.9775	24.4145	493.63	1.0001	94.574
24.6	384.789	1856.68	5.94583	249.827	537.442	78.8184	42.8452	24.6194	493.589	1.0001	94.6104
24.8	384.712	1856.66	5.93663	249.867	537.418	78.8193	42.713	24.8246	493.548	1.0001	94.6467
25	384.636	1856.63	5.92746	249.906	537.393	78.8201	42.5809	25.03	493.507	1.0001	94.6828
25.2	384.56	1856.61	5.9183	249.945	537.367	78.8207	42.449	25.2356	493.466	1.0001	94.7188
25.4	384.484	1856.58	5.90918	249.984	537.341	78.8211	42.3174	25.4414	493.425	1.00011	94.7547
25.6	384.409	1856.55	5.90008	250.022	537.314	78.8214	42.1859	25.6472	493.385	1.00011	94.7904
25.8	384.333	1856.52	5.89102	250.06	537.287	78.8215	42.0548	25.8531	493.345	1.00011	94.8259
26	384.258	1856.49	5.88198	250.098	537.26	78.8215	41.9239	26.0591	493.305	1.00011	94.8613
26.2	384.183	1856.45	5.87297	250.136	537.232	78.8213	41.7933	26.2651	493.265	1.00011	94.8965
26.4	384.109	1856.41	5.864	250.173	537.203	78.8209	41.663	26.471	493.226	1.00011	94.9315
26.6	384.035	1856.37	5.85506	250.21	537.174	78.8204	41.5331	26.6769	493.186	1.00011	94.9664
26.8	383.961	1856.33	5.84615	250.246	537.144	78.8197	41.4035	26.8829	493.148	1.00011	95.001
27	383.888	1856.29	5.83728	250.282	537.114	78.8188	41.2743	27.0887	493.109	1.00011	95.0355
27.2	383.815	1856.24	5.82843	250.318	537.084	78.8178	41.1454	27.2945	493.071	1.00011	95.0699
27.4	383.743	1856.2	5.81962	250.354	537.053	78.8166	41.0168	27.5003	493.034	1.00011	95.104
27.6	383.671	1856.15	5.81084	250.389	537.022	78.8153	40.8886	27.7061	492.996	1.00012	95.138
27.8	383.599	1856.1	5.80208	250.423	536.99	78.8138	40.7607	27.9119	492.96	1.00012	95.1718
28	383.528	1856.05	5.79336	250.458	536.957	78.8121	40.6331	28.1176	492.923	1.00012	95.2054
28.2	383.457	1856	5.78467	250.492	536.924	78.8103	40.5059	28.3234	492.887	1.00012	95.2388
28.4	383.387	1855.94	5.776	250.526	536.891	78.8083	40.379	28.5292	492.851	1.00012	95.2721
28.6	383.317	1855.89	5.76735	250.559	536.857	78.8061	40.2523	28.735	492.816	1.00012	95.3053
28.8	383.248	1855.83	5.75874	250.593	536.823	78.8038	40.126	28.941	492.781	1.00012	95.3383
29	383.179	1855.78	5.75014	250.626	536.788	78.8013	39.9999	29.147	492.747	1.00012	95.3711
29.2	383.11	1855.72	5.74157	250.658	536.753	78.7987	39.874	29.3533	492.713	1.00012	95.4038
29.4	383.042	1855.66	5.73301	250.691	536.717	78.7958	39.7484	29.5597	492.679	1.00012	95.4364
29.6	382.975	1855.6	5.72447	250.723	536.681	78.7928	39.623	29.7663	492.646	1.00013	95.4688
29.8	382.907	1855.54	5.71595	250.754	536.644	78.7897	39.4978	29.9732	492.613	1.00013	95.5011
30	382.841	1855.47	5.70744	250.786	536.607	78.7863	39.3727	30.1804	492.58	1.00013	95.5333
30.2	382.774	1855.41	5.69894	250.817	536.569	78.7828	39.2477	30.388	492.548	1.00013	95.5654
30.4	382.708	1855.35	5.69045	250.848	536.531	78.7791	39.1229	30.596	492.517	1.00013	95.5974
30.6	382.643	1855.28	5.68197	250.879	536.492	78.7752	38.9981	30.8044	492.485	1.00013	95.6293
30.8	382.577	1855.21	5.6735	250.91	536.452	78.7712	38.8734	31.0134	492.454	1.00013	95.6611
31	382.513	1855.15	5.66502	250.94	536.412	78.7669	38.7487	31.2229	492.424	1.00013	95.6928
31.2	382.448	1855.08	5.65655	250.97	536.371	78.7625	38.624	31.433	492.394	1.00013	95.7245
31.4	382.384	1855.01	5.64807	251	536.33	78.7579	38.4992	31.6438	492.364	1.00013	95.7561
31.6	382.32	1854.94	5.63959	251.029	536.288	78.7531	38.3744	31.8554	492.335	1.00013	95.7876
31.8	382.257	1854.87	5.63111	251.059	536.246	78.7481	38.2494	32.0677	492.306	1.00014	95.8191
32	382.193	1854.8	5.62261	251.088	536.203	78.7429	38.1243	32.281	492.277	1.00014	95.8506
32.2	382.13	1854.72	5.6141	251.117	536.159	78.7374	37.9991	32.4951	492.249	1.00014	95.8821
32.4	382.068	1854.65	5.60558	251.146	536.114	78.7318	37.8736	32.7102	492.221	1.00014	95.9135
32.6	382.005	1854.58	5.59704	251.174	536.069	78.726	37.7479	32.9264	492.194	1.00014	95.9449
32.8	381.943	1854.5	5.58848	251.203	536.023	78.7199	37.6218	33.1437	492.166	1.00014	95.9763
33	381.881	1854.43	5.57989	251.231	535.977	78.7137	37.4955	33.3622	492.14	1.00014	96.0077
33.2	381.819	1854.35	5.57128	251.259	535.929	78.7072	37.3689	33.582	492.113	1.00014	96.0392
33.4	381.758	1854.27	5.56265	251.287	535.881	78.7004	37.2418	33.8031	492.087	1.00014	96.0706
33.6	381.696	1854.19	5.55398	251.315	535.832	78.6935	37.1144	34.0255	492.061	1.00014	96.1021
33.8	381.635	1854.12	5.54529	251.343	535.782	78.6863	36.9865	34.2494	492.036	1.00015	96.1337
34	381.574	1854.04	5.53656	251.37	535.732	78.6788	36.8581	34.4747	492.011	1.00015	96.1652
34.2	381.513	1853.96	5.52779	251.397	535.68	78.6711	36.7293	34.7016	491.986	1.00015	96.1968
34.4	381.453	1853.87	5.51899	251.424	535.628	78.6631	36.6	34.93	491.962	1.00015	96.2285
34.6	381.392	1853.79	5.51015	251.451	535.574	78.6549	36.4702	35.1601	491.938	1.00015	96.2602
34.8	381.332	1853.71	5.50127	251.478	535.52	78.6464	36.3398	35.3918	491.914	1.00015	96.292
35	381.271	1853.63	5.49235	251.505	535.465	78.6377	36.2089	35.6251	491.891	1.00015	96.3239
35.2	381.211	1853.54	5.48338	251.531	535.409	78.6286	36.0774	35.8602	491.868	1.00015	96.3558
35.4	381.151	1853.46	5.47438	251.558	535.352	78.6193	35.9454	36.097	491.845	1.00015	96.3877
35.6	381.091	1853.37	5.46534	251.584	535.294	78.6097	35.8128	36.3355	491.823	1.00015	96.4198
35.8	381.032	1853.29	5.45625	251.61	535.235	78.5998	35.6797	36.5757	491.801	1.00015	96.4519
36	380.972	1853.2	5.44712	251.635	535.175	78.5896	35.546	36.8176	491.779	1.00016	96.484
36.2	380.913	1853.11	5.43795	251.661	535.114	78.5791	35.4119	37.0612	491.758	1.00016	96.5162
36.4	380.853	1853.02	5.42875	251.686	535.052	78.5684	35.2772	37.3065	491.737	1.00016	96.5485
36.6	380.794	1852.94	5.4195	251.711	534.989	78.5573	35.142	37.5535	491.717	1.00016	96.5808
36.8	380.735	1852.85	5.41021	251.736	534.925	78.5459	35.0063	37.8021	491.697	1.00016	96.6131
37	380.677	1852.76	5.40089	251.761	534.86	78.5342	34.8701	38.0523	491.677	1.00016	96.6455
37.2	380.618	1852.67	5.39153	251.786	534.794	78.5222	34.7336	38.3041	491.658	1.00016	96.6779
37.4	380.56	1852.58	5.38214	251.81	534.727	78.5098	34.5965	38.5574	491.639	1.00016	96.7103
37.6	380.501	1852.49	5.37271	251.834	534.659	78.4972	34.4591	38.8123	491.621	1.00016	96.7427
37.8	380.443	1852.4	5.36325	251.857	534.59	78.4842	34.3213	39.0687	491.603	1.00016	96.7752
38	380.386	1852.31	5.35376	251.881	534.52	78.4709	34.1831	39.3265	491.585	1.00017	96.8077
38.2	380.328	1852.22	5.34424	251.904	534.449	78.4573	34.0446	39.5858	491.568	1.00017	96.8402
38.4	380.271	1852.13	5.33469	251.927	534.377	78.4434	33.9058	39.8465	491.551	1.00017	96.8726
38.6	380.213	1852.04	5.32511	251.949	534.304	78.4291	33.7666	40.1085	491.535	1.00017	96.9051
38.8	380.156	1851.94	5.3155	251.971	534.229	78.4145	33.6271	40.372	491.519	1.00017	96.9376
39	380.1	1851.85	5.30587	251.993	534.154	78.3996	33.4874	40.6368	491.504	1.00017	96.97
39.2	380.043	1851.76	5.29621	252.015	534.078	78.3844	33.3473	40.9029	491.488	1.00017	97.0025
39.4	379.987	1851.67	5.28652	252.036	534.001	78.3688	33.207	41.1703	491.474	1.00017	97.0349
39.6	379.931	1851.58	5.27681	252.057	533.923	78.3528	33.0665	41.439	491.459	1.00017	97.0673
39.8	379.875	1851.49	5.26707	252.078	533.843	78.3365	32.9256	41.709	491.445	1.00017	97.0997
40	379.819	1851.4	5.25731	252.098	533.763	78.3199	32.7846	41.9803	491.432	1.00017	97.132
40.2	379.764	1851.31	5.24753	252.118	533.681	78.3029	32.6433	42.2528	491.419	1.00018	97.1644
40.4	379.708	1851.22	5.23772	252.137	533.599	78.2856	32.5018	42.5265	491.406	1.00018	97.1967
40.6	379.653	1851.12	5.22789	252.156	533.515	78.2679	32.3601	42.8014	491.394	1.00018	97.2289
40.8	379.598	1851.03	5.21804	252.175	533.431	78.2499	32.2182	43.0775	491.382	1.00018	97.2611
41	379.544	1850.94	5.20817	252.194	533.345	78.2315	32.0761	43.3547	491.37	1.00018	97.2933
41.2	379.489	1850.85	5.19828	252.212	533.258	78.2128	31.934	43.633	491.359	1.00018	97.3254
41.4	379.435	1850.76	5.18838	252.229	533.171	78.1937	31.7917	43.9122	491.348	1.00018	97.3574
41.6	379.381	1850.67	5.17847	252.246	533.082	78.1742	31.6493	44.1924	491.338	1.00018	97.3894
41.8	379.327	1850.59	5.16854	252.263	532.992	78.1544	31.507	44.4735	491.328	1.00018	97.4213
42	379.273	1850.5	5.15861	252.279	532.901	78.1343	31.3646	44.7553	491.318	1.00018	97.4531
42.2	379.22	1850.41	5.14867	252.295	532.809	78.1138	31.2223	45.0379	491.309	1.00019	97.4848
42.4	379.167	1850.32	5.13873	252.311	532.717	78.093	31.0801	45.321	491.3	1.00019	97.5164
42.6	379.114	1850.23	5.12879	252.326	532.623	78.0718	30.9381	45.6046	491.291	1.00019	97.5479
42.8	379.061	1850.15	5.11885	252.34	532.529	78.0503	30.7963	45.8886	491.283	1.00019	97.5792
43	379.009	1850.06	5.10893	252.354	532.433	78.0285	30.6547	46.1729	491.275	1.00019	97.6104
43.2	378.956	1849.98	5.09902	252.368	532.337	78.0064	30.5134	46.4573	491.267	1.00019	97.6414
43.4	378.905	1849.89	5.08912	252.381	532.24	77.9839	30.3725	46.7419	491.26	1.00019	97.6723
43.6	378.853	1849.81	5.07924	252.393	532.142	77.9612	30.232	47.0263	491.253	1.00019	97.703
43.8	378.802	1849.72	5.06938	252.405	532.044	77.9382	30.0919	47.3107	491.247	1.00019	97.7335
44	378.751	1849.64	5.05955	252.417	531.944	77.9148	29.9524	47.5949	491.24	1.00019	97.7637
44.2	378.7	1849.56	5.04974	252.428	531.844	77.8912	29.8133	47.8788	491.234	1.00019	97.7938
44.4	378.65	1849.48	5.03997	252.439	531.744	77.8673	29.6748	48.1623	491.229	1.0002	97.8237
44.6	378.6	1849.4	5.03022	252.449	531.642	77.8432	29.5369	48.4455	491.223	1.0002	97.8534
44.8	378.55	1849.32	5.0205	252.458	531.54	77.8187	29.3995	48.7282	491.218	1.0002	97.8828
45	378.501	1849.24	5.01081	252.467	531.438	77.794	29.2627	49.0105	491.213	1.0002	97.912
45.2	378.451	1849.17	5.00115	252.475	531.335	77.769	29.1264	49.2924	491.208	1.0002	97.9411
45.4	378.402	1849.09	4.99153	252.483	531.231	77.7437	28.9908	49.5739	491.204	1.0002	97.9699
45.6	378.354	1849.02	4.98193	252.491	531.126	77.7181	28.8556	49.855	491.2	1.0002	97.9984
45.8	378.305	1848.94	4.97235	252.497	531.02	77.6922	28.721	50.1357	491.196	1.0002	98.0268
46	378.257	1848.87	4.9628	252.504	530.914	77.6661	28.5869	50.4162	491.192	1.0002	98.055
46.2	378.209	1848.79	4.95327	252.509	530.807	77.6396	28.4532	50.6965	491.189	1.0002	98.083
46.4	378.161	1848.72	4.94376	252.515	530.7	77.6128	28.3199	50.9767	491.186	1.00021	98.1108
46.6	378.113	1848.65	4.93426	252.519	530.591	77.5857	28.187	51.2569	491.182	1.00021	98.1384
46.8	378.066	1848.58	4.92477	252.523	530.481	77.5582	28.0544	51.5371	491.18	1.00021	98.1659
47	378.018	1848.51	4.91529	252.527	530.371	77.5304	27.922	51.8176	491.177	1.00021	98.1932
47.2	377.971	1848.44	4.90581	252.53	530.259	77.5022	27.7898	52.0983	491.174	1.00021	98.2203
47.4	377.923	1848.37	4.89633	252.532	530.147	77.4736	27.6577	52.3796	491.172	1.00021	98.2474
47.6	377.876	1848.3	4.88684	252.534	530.033	77.4446	27.5257	52.6614	491.169	1.00021	98.2743
47.8	377.828	1848.24	4.87734	252.536	529.918	77.4152	27.3937	52.9439	491.167	1.00021	98.3011
48	377.78	1848.17	4.86782	252.536	529.802	77.3853	27.2617	53.2273	491.165	1.00021	98.3278
48.2	377.733	1848.1	4.85828	252.537	529.684	77.355	27.1295	53.5117	491.163	1.00021	98.3544
48.4	377.685	1848.04	4.84872	252.536	529.565	77.3241	26.9971	53.7972	491.162	1.00021	98.381
48.6	377.637	1847.97	4.83912	252.535	529.444	77.2928	26.8645	54.0839	491.16	1.00022	98.4075
48.8	377.589	1847.91	4.82949	252.534	529.322	77.2609	26.7316	54.372	491.159	1.00022	98.4339
49	377.54	1847.84	4.81982	252.531	529.198	77.2285	26.5984	54.6617	491.157	1.00022	98.4603
49.2	377.491	1847.78	4.8101	252.528	529.072	77.1955	26.4647	54.9529	491.156	1.00022	98.4866
49.4	377.442	1847.72	4.80034	252.525	528.945	77.1619	26.3305	55.246	491.155	1.00022	98.5129
49.6	377.393	1847.65	4.79052	252.52	528.815	77.1277	26.1959	55.5409	491.153	1.00022	98.5392
49.8	377.344	1847.59	4.78065	252.515	528.684	77.0928	26.0606	55.8378	491.152	1.00022	98.5655
50	377.294	1847.53	4.77071	252.51	528.55	77.0573	25.9248	56.1368	491.151	1.00022	98.5917
50.2	377.243	1847.46	4.76071	252.503	528.415	77.021	25.7882	56.4381	491.15	1.00022	98.618
50.4	377.192	1847.4	4.75065	252.496	528.277	76.9841	25.651	56.7416	491.15	1.00022	98.6442
50.6	377.141	1847.34	4.74051	252.488	528.136	76.9464	25.513	57.0476	491.149	1.00023	98.6705
50.8	377.09	1847.28	4.7303	252.479	527.993	76.9079	25.3743	57.356	491.148	1.00023	98.6967
51	377.037	1847.21	4.72001	252.469	527.848	76.8686	25.2347	57.6671	491.148	1.00023	98.723
51.2	376.985	1847.15	4.70964	252.459	527.7	76.8285	25.0943	57.9808	491.147	1.00023	98.7493
51.4	376.932	1847.09	4.69919	252.447	527.55	76.7875	24.953	58.2972	491.146	1.00023	98.7756
51.6	376.878	1847.03	4.68865	252.435	527.397	76.7457	24.8108	58.6164	491.146	1.00023	98.8018
51.8	376.824	1846.97	4.67802	252.421	527.241	76.703	24.6678	58.9385	491.145	1.00023	98.8281
52	376.769	1846.91	4.66731	252.407	527.082	76.6593	24.5237	59.2634	491.145	1.00023	98.8544
52.2	376.713	1846.85	4.6565	252.392	526.92	76.6147	24.3788	59.5913	491.145	1.00023	98.8807
52.4	376.657	1846.78	4.6456	252.375	526.755	76.5691	24.2329	59.9221	491.144	1.00023	98.907
52.6	376.6	1846.72	4.63461	252.358	526.587	76.5226	24.0861	60.2559	491.144	1.00023	98.9332
52.8	376.543	1846.66	4.62353	252.339	526.416	76.475	23.9383	60.5925	491.144	1.00024	98.9595
53	376.485	1846.6	4.61235	252.319	526.242	76.4264	23.7896	60.9321	491.144	1.00024	98.9857
53.2	376.427	1846.54	4.60108	252.298	526.064	76.3767	23.64	61.2746	491.144	1.00024	99.0119
53.4	376.367	1846.48	4.58972	252.276	525.883	76.326	23.4896	61.62	491.144	1.00024	99.038
53.6	376.307	1846.42	4.57826	252.252	525.698	76.2741	23.3382	61.9682	491.144	1.00024	99.064
53.8	376.247	1846.36	4.56672	252.227	525.51	76.2212	23.186	62.3192	491.144	1.00024	99.09
54	376.186	1846.3	4.55508	252.201	525.319	76.1671	23.033	62.6729	491.144	1.00024	99.1159
54.2	376.124	1846.24	4.54335	252.173	525.124	76.1119	22.8792	63.0293	491.144	1.00024	99.1417
54.4	376.061	1846.18	4.53154	252.144	524.926	76.0554	22.7246	63.3883	491.144	1.00024	99.1673
54.6	375.998	1846.12	4.51963	252.114	524.723	75.9978	22.5693	63.7499	491.144	1.00024	99.1929
54.8	375.934	1846.05	4.50764	252.082	524.517	75.939	22.4133	64.1141	491.144	1.00025	99.2183
55	375.87	1845.99	4.49555	252.048	524.307	75.8788	22.2564	64.4809	491.145	1.00025	99.2435
55.2	375.804	1845.93	4.48338	252.012	524.093	75.8174	22.0989	64.8502	491.145	1.00025	99.2686
55.4	375.738	1845.87	4.4711	251.975	523.874	75.7546	21.9406	65.2222	491.146	1.00025	99.2935
55.6	375.672	1845.81	4.45873	251.936	523.652	75.6904	21.7815	65.5969	491.146	1.00025	99.3183
55.8	375.604	1845.75	4.44625	251.895	523.424	75.6247	21.6215	65.9745	491.147	1.00025	99.3428
56	375.535	1845.69	4.43366	251.852	523.192	75.5575	21.4607	66.355	491.148	1.00025	99.3672
56.2	375.466	1845.62	4.42095	251.807	522.955	75.4886	21.2989	66.7387	491.148	1.00025	99.3913
56.4	375.396	1845.56	4.40811	251.76	522.712	75.4179	21.1359	67.1259	491.149	1.00025	99.4153
56.6	375.324	1845.5	4.39512	251.71	522.463	75.3454	20.9717	67.5169	491.151	1.00025	99.439
56.8	375.252	1845.43	4.38196	251.658	522.208	75.2708	20.8061	67.9121	491.152	1.00025	99.4626
57	375.178	1845.37	4.36862	251.603	521.946	75.194	20.6388	68.3122	491.154	1.00026	99.486
57.2	375.103	1845.3	4.35508	251.545	521.676	75.1148	20.4696	68.7175	491.155	1.00026	99.5091
57.4	375.026	1845.23	4.3413	251.484	521.397	75.0329	20.2983	69.129	491.157	1.00026	99.5321
57.6	374.947	1845.16	4.32726	251.419	521.109	74.948	20.1244	69.5473	491.16	1.00026	99.5549
57.8	374.867	1845.09	4.31291	251.35	520.811	74.8598	19.9476	69.9735	491.162	1.00026	99.5776
58	374.784	1845.02	4.29821	251.276	520.5	74.768	19.7674	70.4087	491.165	1.00026	99.6
58.2	374.698	1844.94	4.28312	251.198	520.176	74.672	19.5834	70.854	491.169	1.00026	99.6223
58.4	374.61	1844.87	4.26758	251.114	519.837	74.5714	19.3949	71.3111	491.173	1.00026	99.6445
58.6	374.518	1844.78	4.25151	251.024	519.481	74.4654	19.2011	71.7815	491.177	1.00026	99.6665
58.8	374.422	1844.7	4.23486	250.926	519.105	74.3535	19.0015	72.2671	491.182	1.00026	99.6883
59	374.322	1844.61	4.21752	250.821	518.706	74.2346	18.795	72.7701	491.188	1.00027	99.7099
59.2	374.217	1844.51	4.19939	250.706	518.282	74.1079	18.5807	73.293	491.195	1.00027	99.7313
59.4	374.107	1844.41	4.18036	250.58	517.828	73.972	18.3573	73.8387	491.203	1.00027	99.7524
59.6	373.989	1844.3	4.16029	250.441	517.339	73.8256	18.1236	74.4103	491.212	1.00027	99.7731
59.8	373.864	1844.18	4.13902	250.287	516.81	73.667	17.8779	75.0118	491.223	1.00027	99.7934
60	373.731	1844.06	4.11635	250.116	516.234	73.494	17.6186	75.6472	491.236	1.00027	99.8131
60.2	373.587	1843.91	4.09208	249.924	515.602	73.3042	17.3435	76.3215	491.251	1.00027	99.8319
60.4	373.431	1843.76	4.06593	249.708	514.906	73.0947	17.0503	77.04	491.269	1.00027	99.8496
60.6	373.261	1843.59	4.03762	249.461	514.132	72.8619	16.7364	77.8089	491.291	1.00027	99.8657
60.8	373.075	1843.39	4.00681	249.18	513.266	72.6015	16.399	78.6348	491.317	1.00027	99.8796
61	372.87	1843.17	3.97309	248.855	512.293	72.3086	16.0347	79.5247	491.349	1.00027	99.8906
61.2	372.643	1842.92	3.93605	248.479	511.19	71.9771	15.6403	80.4855	491.387	1.00028	99.8976
61.4	372.39	1842.63	3.89518	248.041	509.935	71.6	15.2122	81.5246	491.434	1.00028	99.8992
61.6	372.108	1842.29	3.84993	247.528	508.498	71.1691	14.7463	82.6488	491.492	1.00028	99.8935
61.8	371.792	1841.9	3.79967	246.923	506.844	70.6745	14.239	83.8643	491.563	1.00028	99.8782
62	371.436	1841.44	3.74377	246.209	504.935	70.1051	13.6864	85.175	491.65	1.00028	99.8502
62.2	371.036	1840.89	3.68162	245.365	502.726	69.4495	13.0865	86.5798	491.758	1.00028	99.8056
62.4	370.586	1840.24	3.61291	244.37	500.179	68.698	12.4401	88.0679	491.891	1.00028	99.7402
62.6	370.085	1839.48	3.53754	243.204	497.259	67.8424	11.7509	89.6202	492.053	1.00028	99.649
62.8	369.529	1838.58	3.45554	241.849	493.932	66.876	11.0244	91.2114	492.25	1.00028	99.5268
63	368.918	1837.53	3.3671	240.285	490.167	65.793	10.2676	92.8103	492.486	1.00028	99.3681
63.2	368.25	1836.3	3.27257	238.492	485.934	64.5899	9.48897	94.3808	492.768	1.00028	99.1671
63.4	367.524	1834.87	3.17242	236.456	481.21	63.2646	8.69813	95.883	493.101	1.00028	98.9183
63.6	366.743	1833.22	3.0672	234.159	475.974	61.817	7.90521	97.2747	493.491	1.00028	98.6161
63.8	365.906	1831.31	2.95757	231.589	470.207	60.2483	7.12042	98.5132	493.945	1.00028	98.2551
64	365.017	1829.13	2.84419	228.731	463.897	58.5612	6.35356	99.5565	494.47	1.00029	97.8303
64.2	364.078	1826.64	2.72773	225.576	457.029	56.7594	5.6137	100.364	495.072	1.00029	97.3365
64.4	363.091	1823.81	2.60888	222.112	449.596	54.8479	4.90888	100.899	495.758	1.00029	96.7693
64.6	362.061	1820.63	2.4883	218.331	441.59	52.8331	4.246	101.127	496.536	1.00029	96.1241
64.8	360.99	1817.05	2.36664	214.226	433.007	50.7222	3.63059	101.017	497.414	1.00029	95.3969
65	359.882	1813.05	2.24451	209.792	423.845	48.5243	3.06679	100.545	498.399	1.00029	94.5837
65.2	358.74	1808.61	2.12251	205.025	414.106	46.2494	2.55733	99.6919	499.5	1.00029	93.6812
65.4	357.568	1803.68	2.00124	199.925	403.797	43.9096	2.10359	98.4443	500.724	1.00029	92.6865
65.6	356.368	1798.25	1.88124	194.498	392.932	41.519	1.70558	96.7968	502.078	1.00029	91.5973
65.8	355.144	1792.28	1.7631	188.751	381.531	39.0934	1.36207	94.7523	503.568	1.00029	90.4124
66	353.899	1785.73	1.64736	182.7	369.625	36.6505	1.07063	92.3226	505.199	1.00029	89.1317
66.2	352.636	1778.59	1.53454	176.365	357.252	34.2097	0.827811	89.5284	506.972	1.00029	87.7562
66.4	351.357	1770.81	1.42512	169.775	344.464	31.7911	0.6293	86.3999	508.887	1.00029	86.2884
66.6	350.066	1762.38	1.31958	162.961	331.318	29.4151	0.470184	82.9749	510.937	1.00029	84.7322
66.8	348.764	1753.28	1.21829	155.965	317.884	27.1018	0.345206	79.2982	513.115	1.00029	83.0931
67	347.457	1743.51	1.12159	148.83	304.235	24.8697	0.249048	75.4196	515.405	1.00029	81.3779
67.2	346.145	1733.06	1.02976	141.602	290.454	22.7349	0.176579	71.3914	517.789	1.00029	79.5946
67.4	344.834	1721.96	0.942969	134.331	276.621	20.7109	0.123077	67.2667	520.242	1.00029	77.7522
67.6	343.526	1710.23	0.861346	127.066	262.819	18.8078	0.0843662	63.0967	522.737	1.00029	75.8607
67.8	342.225	1697.92	0.784932	119.854	249.127	17.0322	0.0569017	58.9295	525.239	1.00029	73.9303
68	340.936	1685.07	0.713701	112.738	235.62	15.3872	0.0377811	54.8085	527.713	1.00029	71.9716
68.2	339.663	1671.76	0.647567	105.76	222.363	13.8728	0.0247082	50.7714	530.121	1.00029	69.9948
68.4	338.408	1658.04	0.586389	98.9519	209.413	12.4862	0.0159232	46.85	532.421	1.00029	68.0098
68.6	337.175	1644	0.529983	92.3445	196.82	11.2225	0.0101162	43.0698	534.572	1.00029	66.0255
68.8	335.968	1629.7	0.47813	85.9607	184.621	10.0753	0.00633779	39.4508	536.532	1.00029	64.0503
69	334.789	1615.22	0.430588	79.8187	172.845	9.03711	0.00391638	36.0074	538.261	1.00029	62.0912
69.2	333.639	1600.61	0.387099	73.9315	161.514	8.09972	0.0023873	32.7497	539.717	1.00029	60.1544
69.4	332.52	1585.94	0.3474	68.3082	150.641	7.25492	0.00143555	29.6834	540.862	1.00029	58.2448
69.6	331.433	1571.25	0.311226	62.9541	140.235	6.49457	0.00085153	26.8112	541.658	1.00029	56.3663
69.8	330.377	1556.59	0.278321	57.8719	130.297	5.81085	0.000498226	24.1329	542.069	1.00029	54.5222
70	329.353	1541.99	0.248437	53.0617	120.829	5.19643	0.00028752	21.6463	542.059	1.00029	52.7146
70.2	328.36	1527.48	0.221339	48.5224	111.828	4.64455	0.000163652	19.3475	541.597	1.00029	50.9451
70.4	327.398	1513.08	0.196807	44.2512	103.289	4.14902	9.18792e-05	17.2316	540.653	1.00029	49.2148
70.6	326.466	1498.8	0.174636	40.2445	95.2058	3.70424	5.08907e-05	15.2923	539.199	1.00029	47.5241
70.8	325.564	1484.66	0.154635	36.4981	87.5735	3.30513	2.78188e-05	13.5227	537.214	1.00029	45.8732
71	324.691	1470.68	0.136626	33.0069	80.3846	2.94718	1.50159e-05	11.9154	534.681	1.00029	44.2617
71.2	323.846	1456.85	0.120446	29.7651	73.632	2.6263	8.00942e-06	10.4623	531.588	1.00029	42.6892
71.4	323.03	1443.2	0.105943	26.7666	67.308	2.33887	4.22578e-06	9.15494	527.936	1.00029	41.1551
71.6	322.242	1429.73	0.0929792	24.0047	61.4048	2.08164	2.20792e-06	7.98466	523.732	1.00029	39.6585
71.8	321.483	1416.47	0.0814236	21.4716	55.9134	1.85168	1.14394e-06	6.94241	519.001	1.00029	38.1988
72	320.751	1403.44	0.0711552	19.1589	50.8239	1.64635	5.88568e-07	6.01896	513.777	1.00029	36.7755
72.2	320.048	1390.65	0.0620604	17.0571	46.1251	1.46328	3.01171e-07	5.20497	508.111	1.00029	35.3882
72.4	319.374	1378.13	0.0540326	15.1561	41.8042	1.3003	1.53496e-07	4.49106	502.067	1.00029	34.037
72.6	318.73	1365.93	0.0469712	13.4446	37.8467	1.15545	7.80256e-08	3.86794	495.723	1.00029	32.7224
72.8	318.115	1354.05	0.0407807	11.9105	34.2359	1.02691	3.96042e-08	3.32646	489.162	1.00029	31.4452
73	317.53	1342.55	0.0353705	10.541	30.9532	0.913005	2.00904e-08	2.85778	482.471	1.00029	30.2064
73.2	316.974	1331.44	0.0306551	9.32259	27.978	0.812176	1.01906e-08	2.45343	475.737	1.00029	29.0069
73.4	316.447	1320.74	0.026554	8.24173	25.2882	0.722977	5.16917e-09	2.10547	469.036	1.00029	27.8475
73.6	315.949	1310.46	0.0229926	7.28476	22.8606	0.644071	2.62116e-09	1.80652	462.436	1.00029	26.7281
73.8	315.477	1300.6	0.0199023	6.43845	20.6716	0.574231	1.3276e-09	1.5499	455.99	1.00029	25.6484
74	315.031	1291.15	0.0172211	5.69024	18.6978	0.512342	6.70798e-10	1.32962	449.74	1.00029	24.6073
74.2	314.609	1282.09	0.0148937	5.02849	16.917	0.457401	3.37556e-10	1.14043	443.713	1.00029	23.6029
74.4	314.208	1273.4	0.0128717	4.44266	15.3083	0.408523	1.68829e-10	0.977757	437.926	1.00029	22.6332
74.6	313.826	1265.05	0.0111129	3.92332	13.8526	0.364932	8.37309e-11	0.837696	432.389	1.00029	21.6957
74.8	313.463	1257.02	0.00958133	3.46223	12.5327	0.325955	4.10721e-11	0.716931	427.105	1.00029	20.7878
75	313.115	1249.27	0.00824621	3.05224	11.3336	0.291019	1.9872e-11	0.61267	422.074	1.00029	19.9069
75.2	312.782	1241.79	0.00708156	2.68721	10.2423	0.259634	9.45629e-12	0.522571	417.292	1.00029	19.0507
75.4	312.461	1234.54	0.00606537	2.36189	9.24729	0.231386	4.41265e-12	0.444668	412.757	1.00029	18.2171
75.6	312.151	1227.5	0.00517898	2.07178	8.33899	0.205923	2.01307e-12	0.37731	408.464	1.00029	17.4043
75.8	311.851	1220.66	0.00440647	1.81303	7.50898	0.182947	8.95082e-13	0.319102	404.411	1.00029	16.6106
76	311.56	1213.99	0.00373422	1.58231	6.75003	0.162202	3.86694e-13	0.26886	400.593	1.00029	15.835
76.2	311.277	1207.48	0.00315045	1.37677	6.0559	0.143469	1.61827e-13	0.22557	397.007	1.00029	15.0763
76.4	311	1201.12	0.00264497	1.19389	5.42118	0.12656	6.54114e-14	0.188363	393.651	1.00029	14.334
76.6	310.73	1194.89	0.00220882	1.03149	4.84119	0.111313	2.54709e-14	0.156486	390.522	1.00029	13.6076
76.8	310.465	1188.79	0.00183412	0.887651	4.31181	0.0975849	9.5345e-15	0.129283	387.616	1.00029	12.897
77	310.203	1182.8	0.00151324	0.760388	3.82844	0.0852259	3.42171e-15	0.106133	384.926	1.00029	12.2008
77.2	309.945	1176.9	0.00124009	0.648233	3.38807	0.0741309	1.17615e-15	0.0865437	382.449	1.00029	11.5197
77.4	309.69	1171.11	0.00100932	0.54991	2.9883	0.0642122	3.87353e-16	0.0700847	380.184	1.00029	10.8548
77.6	309.438	1165.41	0.00081596	0.464234	2.62694	0.0553892	1.22413e-16	0.0563656	378.129	1.00029	10.208
77.8	309.189	1159.83	0.000655428	0.390098	2.30207	0.0475886	3.72254e-17	0.0450309	376.279	1.00029	9.58204
78	308.942	1154.36	0.000523472	0.326416	2.01141	0.040733	1.09415e-17	0.0357573	374.628	1.00029	8.97718
78.2	308.703	1149.13	0.000416348	0.272439	1.75535	0.0347941	3.11851e-18	0.0282612	373.179	1.00029	8.40698
78.4	308.452	1143.71	0.000328307	0.225571	1.52122	0.0294878	8.84209e-19	0.0221325	371.864	1.00029	7.83419
78.6	308.266	1139.74	0.000269436	0.193339	1.35641	0.0257897	2.65916e-19	0.0180454	370.943	1.00029	7.41639
78.8	308.002	1134.2	0.000206319	0.156489	1.15644	0.0214213	6.75759e-20	0.013691	369.835	1.00029	6.85576
79	307.737	1128.78	0.000157035	0.12604	0.982366	0.0177077	1.68734e-20	0.0103118	368.877	1.00029	6.32449

## Sheet: scenarios
depth	SCEN1	SCEN2	SCEN3	SCEN4
0	0	1	0	0
0.2	-2.34999e-05	0.999362	1.58745e-05	5.00607
0.4	-4.81953e-05	0.998742	3.24502e-05	9.99546
0.6	-7.41467e-05	0.998134	4.97573e-05	14.9602
0.8	-0.000101387	0.997483	6.78274e-05	19.9012
1	-0.000129951	0.996816	8.66934e-05	24.8184
1.2	-0.000159874	0.996133	0.000106389	29.7118
1.4	-0.000191187	0.995435	0.000126951	34.5814
1.6	-0.000223924	0.99472	0.000148415	39.4273
1.8	-0.000258113	0.993989	0.000170819	44.2493
2	-0.000293784	0.993241	0.000194205	49.0476
2.2	-0.000330964	0.992478	0.000218614	53.8221
2.4	-0.000369677	0.991698	0.000244088	58.5728
2.6	-0.000409949	0.990902	0.000270674	63.2997
2.8	-0.000451799	0.99009	0.000298417	68.0029
3	-0.000495248	0.989261	0.000327366	72.6823
3.2	-0.000540313	0.988417	0.000357572	77.3379
3.4	-0.00058701	0.987557	0.000389086	81.9697
3.6	-0.000635351	0.986681	0.000421964	86.5778
3.8	-0.000685347	0.985789	0.000456262	91.1621
4	-0.000737007	0.984882	0.000492038	95.7227
4.2	-0.000790336	0.98396	0.000529354	100.259
4.4	-0.000845339	0.983022	0.000568271	104.773
4.6	-0.000902017	0.98207	0.000608855	109.262
4.8	-0.000960369	0.981102	0.000651174	113.727
5	-0.00102039	0.980121	0.000695297	118.169
5.2	-0.00108209	0.979125	0.000741298	122.587
5.4	-0.00114544	0.978114	0.00078925	126.982
5.6	-0.00121044	0.97709	0.000839233	131.352
5.8	-0.00127708	0.976053	0.000891325	135.699
6	-0.00134535	0.975001	0.00094561	140.023
6.2	-0.00141523	0.973937	0.00100217	144.322
6.4	-0.00148671	0.97286	0.0010611	148.599
6.6	-0.00155976	0.97177	0.00112249	152.85
6.8	-0.00163437	0.970668	0.00118643	157.08
7	-0.00171052	0.969553	0.00125302	161.283
7.2	-0.00178819	0.968426	0.00132235	165.467
7.4	-0.00186734	0.967288	0.00139454	169.622
7.6	-0.00194797	0.966138	0.00146969	173.761
7.8	-0.00203003	0.964978	0.0015479	177.865
8	-0.00211351	0.963806	0.00162929	181.962
8.2	-0.00219838	0.962623	0.00171397	186.012
8.4	-0.0022846	0.96143	0.00180206	190.071
8.6	-0.00237216	0.960227	0.00189368	194.063
8.8	-0.00246102	0.959014	0.00198895	198.09
9	-0.00255115	0.95779	0.00208801	202.017
9.2	-0.00264252	0.956557	0.00219097	206.02
9.4	-0.0027353	0.955309	0.00229765	209.873
9.6	-0.00282994	0.954042	0.00240739	213.863
9.8	-0.00292672	0.952753	0.00251981	217.63
10	-0.00302568	0.951438	0.00263494	221.619
10.2	-0.00312685	0.950098	0.00275284	225.29
10.4	-0.00323027	0.948733	0.00287353	229.287
10.6	-0.00333597	0.947341	0.00299706	232.856
10.8	-0.00344398	0.945923	0.00312345	236.866
11	-0.00355435	0.944479	0.00325276	240.332
11.2	-0.0036671	0.943008	0.003385	244.35
11.4	-0.00378227	0.941509	0.00352022	247.724
11.6	-0.00389989	0.939983	0.00365846	251.735
11.8	-0.00402001	0.938428	0.00379974	255.039
12	-0.00414265	0.936846	0.00394411	259.02
12.2	-0.00426785	0.935235	0.0040916	262.279
12.4	-0.00439564	0.933595	0.00424224	266.206
12.6	-0.00452605	0.931926	0.00439608	269.445
12.8	-0.00465911	0.930228	0.00455315	273.297
13	-0.00479483	0.928501	0.00471348	276.53
13.2	-0.00493326	0.926745	0.00487713	280.305
13.4	-0.00507439	0.924959	0.00504414	283.529
13.6	-0.00521826	0.923144	0.00521454	287.24
13.8	-0.00536487	0.921299	0.00538839	290.438
14	-0.00551423	0.919426	0.00556573	294.107
14.2	-0.00566634	0.917524	0.00574663	297.258
14.4	-0.0058212	0.915593	0.00593113	300.909
14.6	-0.00597879	0.913634	0.00611929	303.998
14.8	-0.00613911	0.911647	0.00631118	307.642
15	-0.00630212	0.909633	0.00650686	310.671
15.2	-0.0064678	0.907593	0.0067064	314.302
15.4	-0.0066361	0.905527	0.00690988	317.288
15.6	-0.00680699	0.903436	0.00711736	320.89
15.8	-0.00698041	0.90132	0.00732893	323.857
16	-0.00715629	0.899182	0.00754467	327.414
16.2	-0.00733458	0.897022	0.00776466	330.379
16.4	-0.00751523	0.89484	0.00798897	333.889
16.6	-0.00769822	0.892638	0.00821768	336.848
16.8	-0.00788352	0.890415	0.00845086	340.323
17	-0.00807111	0.888172	0.00868858	343.261
17.2	-0.00826094	0.885911	0.0089309	346.718
17.4	-0.008453	0.88363	0.0091779	349.619
17.6	-0.00864724	0.881332	0.00942965	353.071
17.8	-0.00884363	0.879017	0.00968621	355.928
18	-0.00904213	0.876685	0.00994764	359.373
18.2	-0.00924271	0.874337	0.010214	362.198
18.4	-0.00944532	0.871974	0.0104854	365.62
18.6	-0.00964993	0.869597	0.0107618	368.428
18.8	-0.00985649	0.867205	0.0110434	371.814
19	-0.0100649	0.8648	0.0113302	374.615
19.2	-0.0102753	0.862383	0.0116222	377.962
19.4	-0.0104874	0.859955	0.0119196	380.752
19.6	-0.0107013	0.857515	0.0122223	384.069
19.8	-0.0109168	0.855066	0.0125304	386.835
20	-0.011134	0.852608	0.0128441	390.138
20.2	-0.0113528	0.850141	0.0131633	392.867
20.4	-0.0115731	0.847667	0.0134882	396.162
20.6	-0.0117948	0.845187	0.0138188	398.855
20.8	-0.0120179	0.842701	0.0141551	402.135
21	-0.0122423	0.840211	0.0144973	404.804
21.2	-0.0124679	0.837717	0.0148453	408.056
21.4	-0.0126947	0.835221	0.0151993	410.713
21.6	-0.0129225	0.832723	0.0155594	413.929
21.8	-0.0131512	0.830225	0.0159255	416.576
22	-0.0133809	0.827727	0.0162978	419.761
22.2	-0.0136113	0.825231	0.0166763	422.388
22.4	-0.0138425	0.822737	0.0170611	425.553
22.6	-0.0140742	0.820247	0.0174522	428.15
22.8	-0.0143066	0.817761	0.0178497	431.304
23	-0.0145393	0.815281	0.0182537	433.867
23.2	-0.0147724	0.812807	0.0186641	437.008
23.4	-0.0150058	0.810341	0.0190811	439.544
23.6	-0.0152394	0.807882	0.0195046	442.661
23.8	-0.0154731	0.805432	0.0199347	445.182
24	-0.0157068	0.802992	0.0203714	448.267
24.2	-0.0159404	0.800562	0.0208147	450.776
24.4	-0.016174	0.798143	0.0212646	453.831
24.6	-0.0164074	0.795735	0.0217211	456.323
24.8	-0.0166405	0.793339	0.0221842	459.356
25	-0.0168734	0.790956	0.0226538	461.821
25.2	-0.0171059	0.788585	0.02313	464.84
25.4	-0.017338	0.786228	0.0236127	467.275
25.6	-0.0175697	0.783884	0.0241017	470.28
25.8	-0.0178009	0.781553	0.0245972	472.688
26	-0.0180316	0.779236	0.0250989	475.673
26.2	-0.0182618	0.776932	0.0256068	478.062
26.4	-0.0184915	0.774643	0.0261207	481.02
26.6	-0.0187206	0.772367	0.0266407	483.395
26.8	-0.0189492	0.770104	0.0271665	486.323
27	-0.0191772	0.767855	0.027698	488.683
27.2	-0.0194047	0.76562	0.0282352	491.588
27.4	-0.0196316	0.763397	0.0287779	493.925
27.6	-0.019858	0.761187	0.0293258	496.813
27.8	-0.0200839	0.758989	0.029879	499.122
28	-0.0203093	0.756803	0.0304372	501.996
28.2	-0.0205342	0.754629	0.0310003	504.278
28.4	-0.0207586	0.752466	0.031568	507.135
28.6	-0.0209827	0.750314	0.0321403	509.396
28.8	-0.0212063	0.748172	0.032717	512.229
29	-0.0214297	0.746041	0.0332979	514.474
29.2	-0.0216527	0.743918	0.0338828	517.28
29.4	-0.0218754	0.741805	0.0344716	519.511
29.6	-0.022098	0.739699	0.035064	522.291
29.8	-0.0223203	0.737602	0.0356599	524.503
30	-0.0225426	0.735512	0.0362592	527.264
30.2	-0.0227647	0.733428	0.0368616	529.451
30.4	-0.0229869	0.731351	0.037467	532.197
30.6	-0.0232091	0.729279	0.0380751	534.358
30.8	-0.0234313	0.727212	0.0386859	537.089
31	-0.0236538	0.72515	0.0392991	539.227
31.2	-0.0238764	0.723091	0.0399146	541.937
31.4	-0.0240993	0.721035	0.0405321	544.057
31.6	-0.0243226	0.718982	0.0411515	546.743
31.8	-0.0245463	0.716931	0.0417726	548.848
32	-0.0247704	0.714882	0.0423953	551.509
32.2	-0.0249951	0.712833	0.0430194	553.597
32.4	-0.0252204	0.710784	0.0436446	556.236
32.6	-0.0254464	0.708735	0.0442709	558.304
32.8	-0.0256731	0.706685	0.0448981	560.926
33	-0.0259006	0.704633	0.0455259	562.97
33.2	-0.026129	0.70258	0.0461543	565.577
33.4	-0.0263583	0.700524	0.0467831	567.597
33.6	-0.0265887	0.698465	0.0474122	570.187
33.8	-0.02682	0.696403	0.0480413	572.186
34	-0.0270525	0.694337	0.0486705	574.756
34.2	-0.0272862	0.692267	0.0492995	576.738
34.4	-0.027521	0.690193	0.0499282	579.284
34.6	-0.027757	0.688115	0.0505566	581.251
34.8	-0.0279944	0.686033	0.0511845	583.774
35	-0.028233	0.683945	0.0518118	585.724
35.2	-0.0284729	0.681854	0.0524385	588.226
35.4	-0.0287142	0.679758	0.0530645	590.156
35.6	-0.0289567	0.677658	0.0536898	592.642
35.8	-0.0292006	0.675553	0.0543142	594.549
36	-0.0294458	0.673445	0.0549378	597.02
36.2	-0.0296923	0.671333	0.0555606	598.905
36.4	-0.0299401	0.669219	0.0561824	601.359
36.6	-0.0301892	0.667101	0.0568033	603.224
36.8	-0.0304395	0.664981	0.0574234	605.659
37	-0.030691	0.662859	0.0580425	607.507
37.2	-0.0309437	0.660736	0.0586606	609.92
37.4	-0.0311976	0.658612	0.0592779	611.752
37.6	-0.0314525	0.656487	0.0598943	614.143
37.8	-0.0317086	0.654362	0.0605097	615.959
38	-0.0319657	0.652238	0.0611242	618.33
38.2	-0.0322238	0.650114	0.0617379	620.127
38.4	-0.0324829	0.647991	0.0623506	622.481
38.6	-0.032743	0.64587	0.0629624	624.257
38.8	-0.0330041	0.643751	0.0635733	626.596
39	-0.0332661	0.641634	0.0641833	628.352
39.2	-0.033529	0.639519	0.0647924	630.674
39.4	-0.0337928	0.637407	0.0654005	632.41
39.6	-0.0340575	0.635299	0.0660077	634.715
39.8	-0.0343231	0.633193	0.066614	636.433
40	-0.0345896	0.631092	0.0672193	638.718
40.2	-0.0348569	0.628994	0.0678236	640.42
40.4	-0.035125	0.626901	0.068427	642.684
40.6	-0.0353939	0.624813	0.0690295	644.371
40.8	-0.0356635	0.622729	0.069631	646.615
41	-0.0359339	0.620652	0.0702317	648.285
41.2	-0.036205	0.61858	0.0708316	650.511
41.4	-0.0364766	0.616515	0.0714306	652.163
41.6	-0.0367488	0.614458	0.072029	654.373
41.8	-0.0370215	0.612408	0.0726267	656.005
42	-0.0372946	0.610367	0.0732239	658.2
42.2	-0.037568	0.608335	0.0738206	659.813
42.4	-0.0378417	0.606314	0.074417	661.992
42.6	-0.0381154	0.604303	0.0750131	663.586
42.8	-0.0383892	0.602303	0.0756092	665.748
43	-0.038663	0.600316	0.0762053	667.325
43.2	-0.0389366	0.598342	0.0768015	669.468
43.4	-0.0392099	0.596381	0.0773981	671.029
43.6	-0.0394829	0.594434	0.077995	673.154
43.8	-0.0397554	0.592502	0.0785924	674.699
44	-0.0400274	0.590585	0.0791905	676.805
44.2	-0.0402989	0.588683	0.0797893	678.334
44.4	-0.0405697	0.586796	0.0803889	680.422
44.6	-0.0408399	0.584925	0.0809893	681.935
44.8	-0.0411094	0.58307	0.0815906	684.007
45	-0.0413782	0.58123	0.0821929	685.502
45.2	-0.0416463	0.579404	0.082796	687.559
45.4	-0.0419137	0.577594	0.0834001	689.036
45.6	-0.0421805	0.575798	0.0840051	691.078
45.8	-0.0424467	0.574016	0.0846109	692.537
46	-0.0427124	0.572247	0.0852175	694.563
46.2	-0.0429777	0.57049	0.0858247	696.005
46.4	-0.0432426	0.568745	0.0864325	698.015
46.6	-0.0435072	0.567011	0.0870408	699.441
46.8	-0.0437717	0.565287	0.0876495	701.432
47	-0.0440362	0.563572	0.0882583	702.843
47.2	-0.0443007	0.561866	0.0888673	704.817
47.4	-0.0445654	0.560167	0.0894762	706.213
47.6	-0.0448304	0.558474	0.0900848	708.169
47.8	-0.0450959	0.556787	0.0906931	709.55
48	-0.045362	0.555105	0.0913009	711.49
48.2	-0.0456288	0.553427	0.091908	712.855
48.4	-0.0458964	0.551751	0.0925143	714.78
48.6	-0.046165	0.550078	0.0931197	716.128
48.8	-0.0464347	0.548406	0.0937239	718.039
49	-0.0467056	0.546735	0.0943268	719.37
49.2	-0.0469779	0.545064	0.0949283	721.267
49.4	-0.0472516	0.543393	0.0955283	722.582
49.6	-0.047527	0.54172	0.0961267	724.463
49.8	-0.047804	0.540045	0.0967232	725.762
50	-0.0480828	0.538368	0.0973179	727.627
50.2	-0.0483635	0.536688	0.0979106	728.911
50.4	-0.0486462	0.535005	0.0985011	730.76
50.6	-0.048931	0.533318	0.0990895	732.029
50.8	-0.049218	0.531627	0.0996755	733.861
51	-0.0495073	0.529931	0.100259	735.116
51.2	-0.0497989	0.528231	0.10084	736.932
51.4	-0.0500929	0.526526	0.101419	738.172
51.6	-0.0503894	0.524816	0.101995	739.973
51.8	-0.0506885	0.5231	0.102569	741.198
52	-0.0509901	0.521379	0.10314	742.985
52.2	-0.0512944	0.519653	0.103709	744.195
52.4	-0.0516014	0.517921	0.104274	745.968
52.6	-0.051911	0.516184	0.104838	747.163
52.8	-0.0522232	0.514442	0.105398	748.922
53	-0.0525382	0.512695	0.105957	750.102
53.2	-0.0528559	0.510943	0.106513	751.847
53.4	-0.0531762	0.509186	0.107066	753.012
53.6	-0.0534991	0.507425	0.107618	754.743
53.8	-0.0538246	0.505659	0.108167	755.892
54	-0.0541528	0.503889	0.108715	757.609
54.2	-0.0544835	0.502115	0.109261	758.744
54.4	-0.0548167	0.500337	0.109805	760.446
54.6	-0.0551524	0.498554	0.110348	761.567
54.8	-0.0554906	0.496767	0.110889	763.254
55	-0.0558315	0.494975	0.11143	764.361
55.2	-0.0561749	0.493177	0.11197	766.033
55.4	-0.056521	0.491372	0.11251	767.127
55.6	-0.0568698	0.489561	0.113049	768.785
55.8	-0.0572215	0.48774	0.113587	769.866
56	-0.0575764	0.48591	0.114124	771.509
56.2	-0.0579346	0.484067	0.11466	772.577
56.4	-0.0582964	0.482209	0.115195	774.207
56.6	-0.0586622	0.480334	0.115729	775.261
56.8	-0.0590325	0.478439	0.116263	776.878
57	-0.0594078	0.476519	0.116794	777.919
57.2	-0.0597888	0.47457	0.117325	779.523
57.4	-0.0601761	0.472588	0.117853	780.55
57.6	-0.0605707	0.470566	0.11838	782.142
57.8	-0.0609735	0.468497	0.118903	783.155
58	-0.0613858	0.466375	0.119424	784.735
58.2	-0.0618088	0.46419	0.11994	785.734
58.4	-0.0622441	0.461932	0.120453	787.3
58.6	-0.0626936	0.459591	0.120961	788.286
58.8	-0.0631592	0.457151	0.121463	789.839
59	-0.0636433	0.454599	0.121959	790.812
59.2	-0.0641486	0.451916	0.122448	792.352
59.4	-0.0646783	0.449082	0.122929	793.312
59.6	-0.0652362	0.446072	0.123402	794.838
59.8	-0.0658264	0.442858	0.123865	795.787
60	-0.066454	0.439407	0.124317	797.3
60.2	-0.0671247	0.43568	0.124755	798.236
60.4	-0.0678453	0.431632	0.125177	799.736
60.6	-0.0686234	0.427211	0.125579	800.661
60.8	-0.0694677	0.422355	0.125959	802.149
61	-0.0703881	0.416998	0.126314	803.061
61.2	-0.0713952	0.411061	0.12664	804.538
61.4	-0.0725009	0.404459	0.126936	805.439
61.6	-0.0737182	0.397097	0.1272	806.903
61.8	-0.075061	0.388871	0.127431	807.792
62	-0.0765429	0.379681	0.127628	809.246
62.2	-0.0781741	0.369451	0.127792	810.123
62.4	-0.0799564	0.358142	0.127928	811.566
62.6	-0.0818838	0.345759	0.128039	812.431
62.8	-0.0839448	0.332348	0.12813	813.863
63	-0.0861214	0.317989	0.128203	814.716
63.2	-0.0883903	0.302794	0.128263	816.136
63.4	-0.0907235	0.286907	0.128311	816.978
63.6	-0.09309	0.270497	0.12835	818.386
63.8	-0.0954575	0.253748	0.128382	819.216
64	-0.0977949	0.236853	0.128408	820.614
64.2	-0.100074	0.220003	0.12843	821.432
64.4	-0.102268	0.20338	0.128447	822.818
64.6	-0.104359	0.187152	0.128462	823.626
64.8	-0.106328	0.171468	0.128474	825
65	-0.108166	0.156451	0.128484	825.798
65.2	-0.109864	0.1422	0.128492	827.161
65.4	-0.111421	0.128788	0.128499	827.948
65.6	-0.112837	0.116264	0.128505	829.3
65.8	-0.114113	0.104654	0.128509	830.077
66	-0.115255	0.0939623	0.128513	831.419
66.2	-0.116269	0.0841769	0.128517	832.186
66.4	-0.117163	0.0752696	0.12852	833.518
66.6	-0.117944	0.067201	0.128522	834.276
66.8	-0.118622	0.059923	0.128524	835.598
67	-0.119206	0.0533822	0.128525	836.346
67.2	-0.119705	0.0475223	0.128527	837.659
67.4	-0.120129	0.0422866	0.128528	838.397
67.6	-0.120486	0.0376194	0.128528	839.701
67.8	-0.120786	0.0334672	0.128529	840.429
68	-0.121035	0.0297795	0.12853	841.724
68.2	-0.121242	0.026509	0.12853	842.443
68.4	-0.121412	0.0236117	0.128531	843.729
68.6	-0.121552	0.0210474	0.128531	844.438
68.8	-0.121667	0.0187787	0.128531	845.715
69	-0.12176	0.016772	0.128531	846.415
69.2	-0.121836	0.0149966	0.128532	847.683
69.4	-0.121898	0.013425	0.128532	848.373
69.6	-0.121949	0.0120322	0.128532	849.632
69.8	-0.12199	0.0107963	0.128532	850.313
70	-0.122023	0.00969763	0.128532	851.563
70.2	-0.12205	0.00871904	0.128532	852.235
70.4	-0.122071	0.00784539	0.128532	853.476
70.6	-0.122089	0.00706347	0.128532	854.14
70.8	-0.122104	0.00636183	0.128532	855.372
71	-0.122116	0.00573056	0.128532	856.028
71.2	-0.122125	0.00516123	0.128532	857.251
71.4	-0.122132	0.0046467	0.128532	857.899
71.6	-0.122138	0.00418103	0.128532	859.114
71.8	-0.122143	0.00375927	0.128532	859.754
72	-0.122147	0.00337732	0.128532	860.961
72.2	-0.122151	0.00303177	0.128532	861.595
72.4	-0.122154	0.00271975	0.128532	862.794
72.6	-0.122157	0.0024388	0.128532	863.42
72.8	-0.12216	0.00218667	0.128532	864.613
73	-0.122162	0.00196124	0.128532	865.232
73.2	-0.122164	0.00176046	0.128532	866.418
73.4	-0.122166	0.00158227	0.128532	867.03
73.6	-0.122167	0.0014246	0.128532	868.209
73.8	-0.122169	0.00128543	0.128532	868.814
74	-0.12217	0.00116279	0.128532	869.987
74.2	-0.122171	0.0010548	0.128532	870.586
74.4	-0.122171	0.000959732	0.128532	871.752
74.6	-0.122172	0.000876012	0.128532	872.344
74.8	-0.122172	0.000802236	0.128532	873.505
75	-0.122173	0.000737177	0.128532	874.09
75.2	-0.122173	0.00067977	0.128532	875.245
75.4	-0.122174	0.0006291	0.128532	875.824
75.6	-0.122174	0.000584381	0.128532	876.972
75.8	-0.122174	0.000544937	0.128532	877.545
76	-0.122174	0.000510179	0.128532	878.687
76.2	-0.122175	0.00047959	0.128532	879.253
76.4	-0.122175	0.000452711	0.128532	880.389
76.6	-0.122175	0.000429127	0.128532	880.95
76.8	-0.122175	0.000408421	0.128532	882.08
77	-0.122175	0.000390211	0.128532	882.637
77.2	-0.122175	0.00037415	0.128532	883.765
77.4	-0.122175	0.000359977	0.128532	884.322
77.6	-0.122175	0.000347432	0.128532	885.45
77.8	-0.122176	0.000336256	0.128532	886.008
78	-0.122176	0.000326895	0.128532	887.138
78.2	-0.122176	0.000316777	0.128532	887.697
78.4	-0.122176	0.000310525	0.128532	888.826
78.6	-0.122176	0.000303058	0.128532	889.387
78.8	-0.122176	0.000296613	0.128532	890.517
79	-0.122176	0.000286315	0.128532	891.079
