# Supplementary material for: Gas transport in firn: multiple-tracer characterisation and model intercomparison for NEEM, Northern Greenland
Source: Copernicus journal article supplement (doi:10.5194/acp-12-4259-2012), 2012-05-14
Supplement: Supplementary file 6 [file NEEM08_EU_CSIRO.xls]

## Sheet: Diffusivity
depth	Molec_diff	Eddy_diff
0	1.5844e-05	7.86204e-06
0.2	1.5844e-05	7.61602e-06
0.4	1.5844e-05	7.37e-06
0.6	1.5844e-05	7.12805e-06
0.8	1.5844e-05	6.90345e-06
1	1.5844e-05	6.67885e-06
1.2	1.5844e-05	6.46265e-06
1.4	1.5844e-05	6.25723e-06
1.6	1.5844e-05	6.0518e-06
1.8	1.5844e-05	5.85914e-06
2	1.5844e-05	5.67092e-06
2.2	1.5844e-05	5.48422e-06
2.4	1.5844e-05	5.31148e-06
2.6	1.5844e-05	5.13873e-06
2.8	1.5844e-05	4.97301e-06
3	1.5844e-05	4.81423e-06
3.2	1.5844e-05	4.65544e-06
3.4	1.5844e-05	4.5087e-06
3.6	1.5844e-05	4.36252e-06
3.8	1.5844e-05	4.22149e-06
4	1.5844e-05	4.08674e-06
4.2	1.5844e-05	3.95199e-06
4.4	1.5844e-05	3.82747e-06
4.6	1.5844e-05	3.70308e-06
4.8	1.58342e-05	3.58401e-06
5	1.58168e-05	3.46904e-06
5.2	1.57987e-05	3.35561e-06
5.4	1.57775e-05	3.24922e-06
5.6	1.57563e-05	3.14283e-06
5.8	1.57334e-05	3.04293e-06
6	1.57101e-05	2.94437e-06
6.2	1.56853e-05	2.84948e-06
6.4	1.56591e-05	2.75807e-06
6.6	1.56319e-05	2.66818e-06
6.8	1.56017e-05	2.5833e-06
7	1.55715e-05	2.49842e-06
7.2	1.55365e-05	2.41944e-06
7.4	1.55014e-05	2.34055e-06
7.6	1.5462e-05	2.26586e-06
7.8	1.54212e-05	2.19247e-06
8	1.53768e-05	2.12198e-06
8.2	1.53295e-05	2.05364e-06
8.4	1.52793e-05	1.98721e-06
8.6	1.52249e-05	1.92352e-06
8.8	1.51683e-05	1.861e-06
9	1.5106e-05	1.80159e-06
9.2	1.50423e-05	1.74282e-06
9.4	1.49716e-05	1.68735e-06
9.6	1.49002e-05	1.63217e-06
9.8	1.48206e-05	1.58035e-06
10	1.47408e-05	1.52857e-06
10.2	1.46519e-05	1.48012e-06
10.4	1.4563e-05	1.43167e-06
10.6	1.44647e-05	1.38625e-06
10.8	1.43662e-05	1.34091e-06
11	1.42583e-05	1.29833e-06
11.2	1.415e-05	1.25588e-06
11.4	1.40323e-05	1.21599e-06
11.6	1.39142e-05	1.17622e-06
11.8	1.37867e-05	1.13888e-06
12	1.36587e-05	1.10164e-06
12.2	1.35216e-05	1.06665e-06
12.4	1.33838e-05	1.03184e-06
12.6	1.3238e-05	9.99001e-07
12.8	1.30909e-05	9.66481e-07
13	1.29371e-05	9.35633e-07
13.2	1.27816e-05	9.05263e-07
13.4	1.2621e-05	8.76273e-07
13.6	1.24589e-05	8.47921e-07
13.8	1.22944e-05	8.20665e-07
14	1.21298e-05	7.94207e-07
14.2	1.19653e-05	7.68567e-07
14.4	1.18032e-05	7.43885e-07
14.6	1.16425e-05	7.19755e-07
14.8	1.14876e-05	6.96737e-07
15	1.13343e-05	6.74019e-07
15.2	1.1191e-05	6.5256e-07
15.4	1.10501e-05	6.31324e-07
15.6	1.09208e-05	6.11164e-07
15.8	1.07964e-05	5.91372e-07
16	1.06827e-05	5.72371e-07
16.2	1.0572e-05	5.53929e-07
16.4	1.04642e-05	5.36015e-07
16.6	1.03581e-05	5.18836e-07
16.8	1.02526e-05	5.01943e-07
17	1.01495e-05	4.85943e-07
17.2	1.00471e-05	4.70146e-07
17.4	9.94738e-06	4.55112e-07
17.6	9.84894e-06	4.404e-07
17.8	9.75268e-06	4.26213e-07
18	9.65879e-06	4.12514e-07
18.2	9.56641e-06	3.99122e-07
18.4	9.47765e-06	3.8637e-07
18.6	9.38994e-06	3.73801e-07
18.8	9.30596e-06	3.6186e-07
19	9.22341e-06	3.50159e-07
19.2	9.14334e-06	3.38879e-07
19.4	9.06558e-06	3.2799e-07
19.6	8.98917e-06	3.17332e-07
19.8	8.91583e-06	3.07201e-07
20	8.84339e-06	2.97226e-07
20.2	8.77356e-06	2.87706e-07
20.4	8.70507e-06	2.78424e-07
20.6	8.63817e-06	2.69423e-07
20.8	8.57329e-06	2.6079e-07
21	8.50921e-06	2.523e-07
21.2	8.44749e-06	2.44249e-07
21.4	8.38656e-06	2.36351e-07
21.6	8.3271e-06	2.28734e-07
21.8	8.269e-06	2.21389e-07
22	8.2116e-06	2.14182e-07
22.2	8.15601e-06	2.07352e-07
22.4	8.10096e-06	2.0064e-07
22.6	8.04706e-06	1.94183e-07
22.8	7.99409e-06	1.87942e-07
23	7.94167e-06	1.81828e-07
23.2	7.89048e-06	1.76027e-07
23.4	7.83968e-06	1.70331e-07
23.6	7.78964e-06	1.64847e-07
23.8	7.74021e-06	1.59551e-07
24	7.6911e-06	1.54356e-07
24.2	7.64276e-06	1.49433e-07
24.4	7.59463e-06	1.44603e-07
24.6	7.54689e-06	1.39938e-07
24.8	7.49947e-06	1.35449e-07
25	7.4522e-06	1.31048e-07
25.2	7.4052e-06	1.26855e-07
25.4	7.35826e-06	1.22764e-07
25.6	7.31139e-06	1.18789e-07
25.8	7.26453e-06	1.14987e-07
26	7.21763e-06	1.11261e-07
26.2	7.17063e-06	1.07685e-07
26.4	7.12346e-06	1.04223e-07
26.6	7.07618e-06	1.00833e-07
26.8	7.0285e-06	9.76136e-08
27	6.98061e-06	9.44624e-08
27.2	6.9324e-06	9.14074e-08
27.4	6.88366e-06	8.84796e-08
27.6	6.83463e-06	8.56135e-08
27.8	6.78501e-06	8.28607e-08
28	6.73482e-06	8.01974e-08
28.2	6.68425e-06	7.75921e-08
28.4	6.63276e-06	7.511e-08
28.6	6.58072e-06	7.26888e-08
28.8	6.52813e-06	7.03314e-08
29	6.47444e-06	6.80823e-08
29.2	6.42019e-06	6.58821e-08
29.4	6.36509e-06	6.37547e-08
29.6	6.30892e-06	6.17108e-08
29.8	6.25218e-06	5.97124e-08
30	6.1945e-06	5.77913e-08
30.2	6.13616e-06	5.59347e-08
30.4	6.07739e-06	5.41204e-08
30.6	6.01796e-06	5.23847e-08
30.8	5.95821e-06	5.06989e-08
31	5.89821e-06	4.90523e-08
31.2	5.8379e-06	4.74831e-08
31.4	5.77751e-06	4.5953e-08
31.6	5.71706e-06	4.44608e-08
31.8	5.65668e-06	4.30397e-08
32	5.59642e-06	4.16514e-08
32.2	5.5363e-06	4.03013e-08
32.4	5.47659e-06	3.90119e-08
32.6	5.41717e-06	3.77526e-08
32.8	5.35812e-06	3.65304e-08
33	5.29979e-06	3.53608e-08
33.2	5.24192e-06	3.42189e-08
33.4	5.18465e-06	3.31119e-08
33.6	5.12837e-06	3.20513e-08
33.8	5.07272e-06	3.10162e-08
34	5.01789e-06	3.0013e-08
34.2	4.96432e-06	2.90516e-08
34.4	4.91154e-06	2.81134e-08
34.6	4.85976e-06	2.72039e-08
34.8	4.80952e-06	2.63325e-08
35	4.76023e-06	2.54824e-08
35.2	4.71208e-06	2.46574e-08
35.4	4.6656e-06	2.38679e-08
35.6	4.62003e-06	2.30978e-08
35.8	4.57544e-06	2.23491e-08
36	4.53235e-06	2.16338e-08
36.2	4.49004e-06	2.09363e-08
36.4	4.44849e-06	2.02566e-08
36.6	4.40828e-06	1.96088e-08
36.8	4.36871e-06	1.89771e-08
37	4.32978e-06	1.83617e-08
37.2	4.29187e-06	1.77731e-08
37.4	4.25456e-06	1.72013e-08
37.6	4.21776e-06	1.66441e-08
37.8	4.1817e-06	1.61091e-08
38	4.14617e-06	1.55915e-08
38.2	4.11103e-06	1.50872e-08
38.4	4.07638e-06	1.46007e-08
38.6	4.04218e-06	1.41322e-08
38.8	4.00825e-06	1.36758e-08
39	3.97461e-06	1.32333e-08
39.2	3.94129e-06	1.28093e-08
39.4	3.90813e-06	1.23964e-08
39.6	3.87512e-06	1.19944e-08
39.8	3.84227e-06	1.16101e-08
40	3.80947e-06	1.12365e-08
40.2	3.77671e-06	1.08728e-08
40.4	3.74397e-06	1.05228e-08
40.6	3.71124e-06	1.01849e-08
40.8	3.6785e-06	9.85592e-09
41	3.64576e-06	9.5371e-09
41.2	3.61298e-06	9.23148e-09
41.4	3.58018e-06	8.93395e-09
41.6	3.54736e-06	8.64446e-09
41.8	3.51447e-06	8.36704e-09
42	3.48153e-06	8.09801e-09
42.2	3.44854e-06	7.83622e-09
42.4	3.41547e-06	7.58326e-09
42.6	3.38232e-06	7.34002e-09
42.8	3.34908e-06	7.10333e-09
43	3.31578e-06	6.87311e-09
43.2	3.28234e-06	6.65269e-09
43.4	3.2488e-06	6.43873e-09
43.6	3.21516e-06	6.2306e-09
43.8	3.1814e-06	6.02943e-09
44	3.14748e-06	5.83603e-09
44.2	3.11344e-06	5.64791e-09
44.4	3.07929e-06	5.46498e-09
44.6	3.04494e-06	5.28946e-09
44.8	3.01045e-06	5.11944e-09
45	2.97581e-06	4.95411e-09
45.2	2.94103e-06	4.79378e-09
45.4	2.90601e-06	4.64014e-09
45.6	2.87084e-06	4.49074e-09
45.8	2.83551e-06	4.34549e-09
46	2.79997e-06	4.20543e-09
46.2	2.76421e-06	4.07043e-09
46.4	2.72827e-06	3.93919e-09
46.6	2.69215e-06	3.81164e-09
46.8	2.65576e-06	3.68919e-09
47	2.61916e-06	3.57061e-09
47.2	2.58237e-06	3.45536e-09
47.4	2.54538e-06	3.34338e-09
47.6	2.50807e-06	3.23626e-09
47.8	2.47061e-06	3.13214e-09
48	2.43302e-06	3.03097e-09
48.2	2.39531e-06	2.93294e-09
48.4	2.35754e-06	2.8389e-09
48.6	2.31977e-06	2.7475e-09
48.8	2.28202e-06	2.65871e-09
49	2.24435e-06	2.57286e-09
49.2	2.20683e-06	2.49031e-09
49.4	2.16947e-06	2.4101e-09
49.6	2.13229e-06	2.33219e-09
49.8	2.09536e-06	2.25695e-09
50	2.05879e-06	2.18451e-09
50.2	2.02251e-06	2.11414e-09
50.4	1.98656e-06	2.04578e-09
50.6	1.95105e-06	1.9798e-09
50.8	1.91606e-06	1.91625e-09
51	1.8815e-06	1.85452e-09
51.2	1.84742e-06	1.79457e-09
51.4	1.81392e-06	1.73667e-09
51.6	1.78111e-06	1.68093e-09
51.8	1.74888e-06	1.62679e-09
52	1.71725e-06	1.57422e-09
52.2	1.68632e-06	1.52338e-09
52.4	1.65627e-06	1.4745e-09
52.6	1.62692e-06	1.42703e-09
52.8	1.59829e-06	1.38093e-09
53	1.57045e-06	1.33627e-09
53.2	1.54357e-06	1.29341e-09
53.4	1.51725e-06	1.25179e-09
53.6	1.49142e-06	1.21138e-09
53.8	1.46599e-06	1.17217e-09
54	1.44094e-06	1.13455e-09
54.2	1.41601e-06	1.09807e-09
54.4	1.39112e-06	1.06265e-09
54.6	1.3662e-06	1.02828e-09
54.8	1.34108e-06	9.95191e-10
55	1.31564e-06	9.63217e-10
55.2	1.28981e-06	9.32178e-10
55.4	1.26353e-06	9.02055e-10
55.6	1.23662e-06	8.72933e-10
55.8	1.20884e-06	8.44914e-10
56	1.18028e-06	8.17716e-10
56.2	1.15084e-06	7.91321e-10
56.4	1.12047e-06	7.65711e-10
56.6	1.08866e-06	7.41126e-10
56.8	1.05561e-06	7.17298e-10
57	1.0213e-06	6.94173e-10
57.2	9.85663e-07	6.71736e-10
57.4	9.48365e-07	6.50071e-10
57.6	9.09151e-07	6.29197e-10
57.8	8.68285e-07	6.0894e-10
58	8.25693e-07	5.89286e-10
58.2	7.81297e-07	5.70219e-10
58.4	7.34361e-07	5.51902e-10
58.6	6.85265e-07	5.34159e-10
58.8	6.34075e-07	5.16944e-10
59	5.80914e-07	5.00243e-10
59.2	5.26019e-07	4.84084e-10
59.4	4.70304e-07	4.68545e-10
59.6	4.14855e-07	4.53469e-10
59.8	3.60288e-07	4.38843e-10
60	3.0722e-07	4.24657e-10
60.2	2.56874e-07	4.10974e-10
60.4	2.10393e-07	3.97772e-10
60.6	1.67991e-07	3.84965e-10
60.8	1.30303e-07	3.72542e-10
61	9.79466e-08	3.60494e-10
61.2	7.31351e-08	3.48899e-10
61.4	5.43441e-08	3.37685e-10
61.6	4.02333e-08	3.26808e-10
61.8	3.01189e-08	3.16259e-10
62	2.33101e-08	3.0603e-10
62.2	1.94592e-08	2.96196e-10
62.4	1.68938e-08	2.86674e-10
62.6	1.48978e-08	2.77438e-10
62.8	1.31389e-08	2.68482e-10
63	1.14985e-08	2.59798e-10
63.2	1.0006e-08	2.51452e-10
63.4	8.62802e-09	2.43367e-10
63.6	7.35726e-09	2.35527e-10
63.8	6.19107e-09	2.27924e-10
64	5.12678e-09	2.20553e-10
64.2	4.18693e-09	2.13465e-10
64.4	3.34604e-09	2.06602e-10
64.6	2.59615e-09	1.99947e-10
64.8	1.93459e-09	1.93494e-10
65	1.35862e-09	1.87239e-10
65.2	8.82404e-10	1.81214e-10
65.4	4.91347e-10	1.7539e-10
65.6	1.76062e-10	1.69742e-10
65.8	0	1.64266e-10
66	0	1.58958e-10
66.2	0	1.53834e-10
66.4	0	1.48892e-10
66.6	0	1.441e-10
66.8	0	1.39454e-10
67	3.86861e-12	1.3495e-10
67.2	2.32744e-11	1.30589e-10
67.4	2.41982e-10	1.26396e-10
67.6	4.9922e-10	1.2233e-10
67.8	7.85992e-10	1.18388e-10
68	1.09758e-09	1.14568e-10
68.2	1.42902e-09	1.10864e-10
68.4	1.77602e-09	1.07297e-10
68.6	2.12819e-09	1.03848e-10
68.8	2.47789e-09	1.00504e-10
69	2.81819e-09	9.72635e-11
69.2	3.14194e-09	9.41223e-11
69.4	3.44037e-09	9.10821e-11
69.6	3.70462e-09	8.81567e-11
69.8	3.94102e-09	8.53208e-11
70	4.14946e-09	8.25719e-11
70.2	4.32982e-09	7.99077e-11
70.4	4.48198e-09	7.73258e-11
70.6	4.60191e-09	7.48344e-11
70.8	4.68975e-09	7.24293e-11
71	4.74919e-09	7.00982e-11
71.2	4.78025e-09	6.78388e-11
71.4	4.78296e-09	6.56492e-11
71.6	4.75742e-09	6.35273e-11
71.8	4.69832e-09	6.14838e-11
72	4.60988e-09	5.95071e-11
72.2	4.49434e-09	5.75912e-11
72.4	4.35226e-09	5.57345e-11
72.6	4.18433e-09	5.39353e-11
72.8	3.99141e-09	5.21919e-11
73	3.76965e-09	5.05143e-11
73.2	3.52565e-09	4.88899e-11
73.4	3.26193e-09	4.73157e-11
73.6	2.98063e-09	4.57901e-11
73.8	2.68423e-09	4.43119e-11
74	2.37561e-09	4.28797e-11
74.2	2.05762e-09	4.15014e-11
74.4	1.73759e-09	4.01668e-11
74.6	1.42097e-09	3.88735e-11
74.8	1.11377e-09	3.76203e-11
75	8.22791e-10	3.6406e-11
75.2	5.55781e-10	3.52295e-11
75.4	3.30754e-10	3.40963e-11
75.6	1.5797e-10	3.29999e-11
75.8	4.87068e-11	3.19376e-11
76	3.32504e-12	3.09082e-11
76.2	0	2.99108e-11
76.4	0	2.89445e-11
76.6	0	2.80121e-11
76.8	0	2.71116e-11
77	0	2.62391e-11
77.2	0	2.53936e-11
77.4	0	2.45745e-11
77.6	0	2.3781e-11
77.8	0	2.30132e-11
78	0	2.22737e-11
78.2	0	2.15572e-11
78.4	0	2.08629e-11
78.6	0	2.01903e-11
78.8	0	1.95387e-11
79	0	1.89075e-11
79.2	0	1.82988e-11
79.4	0	1.77105e-11
79.6	0	1.71404e-11
79.8	0	1.65881e-11
80	0	1.60531e-11
80.2	0	0
80.4	0	0
80.6	0	0
80.8	0	0
81	0	0
81.2	0	0
81.4	0	0
81.6	0	0
81.8	0	0
82	0	0
82.2	0	0
82.4	0	0
82.6	0	0
82.8	0	0
83	0	0
83.2	0	0
83.4	0	0
83.6	0	0
83.8	0	0
84	0	0
84.2	0	0
84.4	0	0
84.6	0	0
84.8	0	0

## Sheet: profiles
depth	CO2	CH4	SF6	CFC_11	CFC_12	CFC_113	HFC_134a	CH3CCl3	14CO2	15NJeff	CCl4
0	382.39	1837.16	6.647	245.83	536.85	78.122	52.82	11.332	487.221	1	91.67
0.2	382.538	1837.49	6.64432	245.856	536.872	78.1306	52.765	11.3751	487.426	1	91.6854
0.4	382.687	1837.82	6.64164	245.881	536.894	78.1393	52.71	11.4182	487.632	1	91.7008
0.6	382.829	1838.14	6.63882	245.908	536.916	78.148	52.654	11.4636	487.828	1	91.7165
0.8	382.969	1838.46	6.63597	245.935	536.938	78.1567	52.5979	11.5095	488.022	1	91.7324
1	383.109	1838.79	6.63312	245.961	536.96	78.1655	52.5419	11.5553	488.217	1	91.7483
1.2	383.248	1839.11	6.63023	245.988	536.982	78.1743	52.4856	11.6018	488.409	1	91.7642
1.4	383.383	1839.42	6.62728	246.015	537.004	78.1831	52.4289	11.6494	488.596	1	91.7803
1.6	383.517	1839.74	6.62432	246.042	537.026	78.1919	52.3722	11.6969	488.783	1.00001	91.7965
1.8	383.648	1840.05	6.6213	246.07	537.048	78.2007	52.3152	11.7456	488.965	1.00001	91.8128
2	383.777	1840.36	6.61824	246.097	537.07	78.2095	52.258	11.7949	489.145	1.00001	91.8292
2.2	383.906	1840.67	6.61518	246.125	537.092	78.2183	52.2008	11.8441	489.324	1.00001	91.8456
2.4	384.029	1840.98	6.61202	246.153	537.114	78.2272	52.1432	11.895	489.496	1.00001	91.8622
2.6	384.152	1841.28	6.60887	246.181	537.135	78.236	52.0856	11.9459	489.667	1.00001	91.8788
2.8	384.273	1841.58	6.60567	246.209	537.157	78.2449	52.0278	11.9975	489.836	1.00001	91.8955
3	384.39	1841.88	6.60242	246.237	537.178	78.2537	51.9699	12.05	489.999	1.00001	91.9123
3.2	384.507	1842.18	6.59917	246.266	537.2	78.2625	51.9119	12.1025	490.163	1.00001	91.9292
3.4	384.618	1842.47	6.59585	246.294	537.221	78.2713	51.8536	12.1563	490.319	1.00001	91.9462
3.6	384.729	1842.76	6.59251	246.323	537.243	78.2801	51.7953	12.2103	490.474	1.00001	91.9632
3.8	384.837	1843.05	6.58914	246.352	537.264	78.2889	51.7369	12.2649	490.627	1.00001	91.9802
4	384.942	1843.33	6.58572	246.381	537.285	78.2976	51.6783	12.3204	490.774	1.00001	91.9974
4.2	385.046	1843.62	6.5823	246.41	537.306	78.3064	51.6198	12.3759	490.921	1.00002	92.0146
4.4	385.145	1843.89	6.57881	246.439	537.326	78.3151	51.561	12.4327	491.062	1.00002	92.0319
4.6	385.244	1844.17	6.57531	246.468	537.347	78.3238	51.5022	12.4897	491.201	1.00002	92.0492
4.8	385.339	1844.44	6.57177	246.497	537.367	78.3325	51.4433	12.5473	491.336	1.00002	92.0666
5	385.431	1844.71	6.5682	246.526	537.388	78.3411	51.3842	12.6057	491.468	1.00002	92.0841
5.2	385.523	1844.98	6.56461	246.556	537.408	78.3497	51.3251	12.6643	491.598	1.00002	92.1016
5.4	385.609	1845.24	6.56096	246.585	537.427	78.3583	51.2657	12.7242	491.722	1.00002	92.1193
5.6	385.696	1845.5	6.5573	246.615	537.447	78.3668	51.2063	12.7841	491.846	1.00002	92.1369
5.8	385.778	1845.75	6.55359	246.645	537.467	78.3754	51.1467	12.8451	491.965	1.00002	92.1547
6	385.858	1846.01	6.54986	246.674	537.486	78.3838	51.0869	12.9064	492.081	1.00002	92.1725
6.2	385.936	1846.26	6.54609	246.704	537.505	78.3923	51.0271	12.9684	492.195	1.00002	92.1903
6.4	386.011	1846.51	6.54229	246.734	537.524	78.4007	50.967	13.0312	492.304	1.00002	92.2083
6.6	386.085	1846.75	6.53848	246.764	537.543	78.4091	50.9069	13.0943	492.412	1.00003	92.2262
6.8	386.154	1846.99	6.5346	246.794	537.562	78.4174	50.8465	13.1586	492.515	1.00003	92.2443
7	386.223	1847.23	6.53073	246.824	537.58	78.4258	50.7861	13.2228	492.617	1.00003	92.2624
7.2	386.288	1847.46	6.52679	246.854	537.598	78.434	50.7253	13.2884	492.713	1.00003	92.2807
7.4	386.352	1847.7	6.52285	246.884	537.616	78.4423	50.6645	13.3542	492.809	1.00003	92.2989
7.6	386.412	1847.92	6.51886	246.914	537.634	78.4505	50.6034	13.4209	492.9	1.00003	92.3173
7.8	386.47	1848.15	6.51484	246.945	537.651	78.4586	50.5422	13.4881	492.989	1.00003	92.3357
8	386.526	1848.37	6.5108	246.975	537.668	78.4667	50.4807	13.5561	493.075	1.00003	92.3542
8.2	386.58	1848.59	6.50672	247.005	537.685	78.4748	50.419	13.6248	493.158	1.00003	92.3728
8.4	386.632	1848.81	6.50261	247.036	537.702	78.4828	50.3571	13.694	493.239	1.00003	92.3914
8.6	386.68	1849.02	6.49846	247.066	537.718	78.4908	50.2948	13.7643	493.316	1.00003	92.4102
8.8	386.728	1849.23	6.4943	247.097	537.734	78.4988	50.2324	13.8348	493.392	1.00003	92.429
9	386.771	1849.43	6.49007	247.127	537.75	78.5067	50.1695	13.9067	493.463	1.00004	92.4479
9.2	386.814	1849.64	6.48585	247.158	537.766	78.5146	50.1066	13.9787	493.534	1.00004	92.4669
9.4	386.853	1849.84	6.48155	247.189	537.781	78.5224	50.043	14.0522	493.599	1.00004	92.486
9.6	386.892	1850.04	6.47726	247.22	537.797	78.5303	49.9794	14.1257	493.665	1.00004	92.5052
9.8	386.927	1850.23	6.47288	247.251	537.812	78.538	49.915	14.201	493.725	1.00004	92.5246
10	386.961	1850.42	6.46851	247.282	537.826	78.5458	49.8506	14.2763	493.785	1.00004	92.544
10.2	386.992	1850.61	6.46407	247.313	537.841	78.5535	49.7854	14.3532	493.841	1.00004	92.5636
10.4	387.022	1850.8	6.45962	247.344	537.855	78.5612	49.7201	14.4303	493.896	1.00004	92.5833
10.6	387.048	1850.98	6.45509	247.376	537.869	78.5688	49.654	14.5092	493.947	1.00004	92.6032
10.8	387.074	1851.16	6.45056	247.407	537.882	78.5764	49.5877	14.5882	493.998	1.00004	92.6231
11	387.096	1851.34	6.44594	247.439	537.896	78.584	49.5205	14.669	494.044	1.00004	92.6433
11.2	387.117	1851.51	6.44132	247.471	537.909	78.5916	49.4531	14.7501	494.09	1.00005	92.6635
11.4	387.136	1851.68	6.43662	247.503	537.921	78.5991	49.3847	14.833	494.132	1.00005	92.684
11.6	387.153	1851.85	6.4319	247.535	537.934	78.6066	49.3161	14.9163	494.174	1.00005	92.7046
11.8	387.167	1852.02	6.42709	247.567	537.946	78.6141	49.2463	15.0016	494.211	1.00005	92.7255
12	387.181	1852.18	6.42228	247.599	537.958	78.6216	49.1763	15.0871	494.249	1.00005	92.7464
12.2	387.191	1852.34	6.41736	247.632	537.97	78.6291	49.105	15.175	494.282	1.00005	92.7677
12.4	387.201	1852.5	6.41243	247.665	537.981	78.6365	49.0335	15.263	494.315	1.00005	92.789
12.6	387.206	1852.66	6.4074	247.698	537.992	78.644	48.9605	15.3536	494.344	1.00005	92.8108
12.8	387.212	1852.81	6.40235	247.731	538.003	78.6514	48.8873	15.4445	494.373	1.00005	92.8326
13	387.214	1852.96	6.3972	247.765	538.014	78.6588	48.8125	15.5379	494.398	1.00005	92.8548
13.2	387.216	1853.11	6.39202	247.799	538.024	78.6662	48.7374	15.6318	494.423	1.00005	92.8771
13.4	387.214	1853.26	6.38673	247.833	538.034	78.6736	48.6607	15.7281	494.445	1.00006	92.8998
13.6	387.211	1853.41	6.38141	247.867	538.043	78.681	48.5834	15.8254	494.465	1.00006	92.9227
13.8	387.206	1853.55	6.37599	247.902	538.053	78.6884	48.5047	15.9248	494.483	1.00006	92.946
14	387.199	1853.69	6.37051	247.937	538.062	78.6958	48.4251	16.0256	494.5	1.00006	92.9695
14.2	387.19	1853.82	6.36496	247.972	538.07	78.7032	48.3443	16.1283	494.514	1.00006	92.9933
14.4	387.179	1853.96	6.35933	248.008	538.079	78.7106	48.2622	16.2328	494.527	1.00006	93.0174
14.6	387.167	1854.09	6.35363	248.044	538.087	78.718	48.1792	16.3387	494.538	1.00006	93.0417
14.8	387.151	1854.22	6.34784	248.08	538.094	78.7254	48.0947	16.447	494.547	1.00006	93.0665
15	387.135	1854.34	6.34201	248.116	538.102	78.7328	48.0095	16.5562	494.554	1.00006	93.0914
15.2	387.116	1854.47	6.33607	248.153	538.108	78.7401	47.9225	16.6682	494.559	1.00006	93.1168
15.4	387.096	1854.59	6.3301	248.19	538.115	78.7475	47.8352	16.7808	494.564	1.00006	93.1422
15.6	387.073	1854.71	6.32402	248.227	538.121	78.7548	47.746	16.8962	494.565	1.00007	93.1682
15.8	387.049	1854.82	6.31792	248.265	538.126	78.7621	47.6564	17.0123	494.565	1.00007	93.1942
16	387.022	1854.93	6.31174	248.303	538.132	78.7693	47.5654	17.1305	494.563	1.00007	93.2205
16.2	386.994	1855.04	6.30552	248.34	538.136	78.7765	47.4737	17.2499	494.56	1.00007	93.247
16.4	386.965	1855.14	6.29925	248.378	538.141	78.7836	47.3812	17.3707	494.556	1.00007	93.2737
16.6	386.933	1855.24	6.29293	248.416	538.144	78.7907	47.2876	17.4931	494.549	1.00007	93.3006
16.8	386.9	1855.34	6.28657	248.454	538.148	78.7978	47.1934	17.6165	494.541	1.00007	93.3277
17	386.865	1855.43	6.28014	248.493	538.151	78.8048	47.0979	17.7421	494.532	1.00007	93.355
17.2	386.829	1855.53	6.27369	248.531	538.153	78.8118	47.002	17.8682	494.521	1.00007	93.3825
17.4	386.79	1855.61	6.26716	248.57	538.155	78.8186	46.9046	17.9968	494.508	1.00007	93.4102
17.6	386.751	1855.7	6.2606	248.609	538.157	78.8255	46.8068	18.1261	494.495	1.00007	93.4381
17.8	386.71	1855.78	6.25399	248.647	538.158	78.8323	46.7078	18.2572	494.48	1.00008	93.4662
18	386.667	1855.85	6.24734	248.686	538.158	78.839	46.608	18.3897	494.463	1.00008	93.4945
18.2	386.623	1855.93	6.24064	248.725	538.158	78.8457	46.5075	18.5233	494.446	1.00008	93.5229
18.4	386.578	1856	6.23389	248.765	538.157	78.8523	46.4058	18.659	494.427	1.00008	93.5516
18.6	386.531	1856.06	6.22712	248.804	538.157	78.8588	46.3038	18.7952	494.407	1.00008	93.5804
18.8	386.482	1856.12	6.22028	248.843	538.155	78.8653	46.2003	18.9339	494.385	1.00008	93.6094
19	386.433	1856.18	6.21341	248.883	538.153	78.8717	46.0964	19.0732	494.363	1.00008	93.6386
19.2	386.382	1856.24	6.2065	248.922	538.15	78.878	45.9914	19.2142	494.34	1.00008	93.6679
19.4	386.33	1856.29	6.19956	248.962	538.147	78.8843	45.8858	19.3566	494.316	1.00008	93.6974
19.6	386.277	1856.34	6.19258	249.001	538.143	78.8905	45.7795	19.5	494.29	1.00008	93.727
19.8	386.223	1856.39	6.18556	249.041	538.139	78.8966	45.6721	19.6453	494.264	1.00008	93.7568
20	386.168	1856.43	6.17851	249.081	538.134	78.9026	45.5644	19.7912	494.237	1.00009	93.7867
20.2	386.111	1856.47	6.17142	249.12	538.129	78.9085	45.4555	19.9391	494.209	1.00009	93.8168
20.4	386.054	1856.5	6.1643	249.16	538.123	78.9144	45.3462	20.0879	494.18	1.00009	93.8469
20.6	385.995	1856.54	6.15716	249.2	538.117	78.9202	45.2361	20.238	494.151	1.00009	93.8772
20.8	385.936	1856.57	6.14997	249.24	538.11	78.9259	45.1252	20.3896	494.121	1.00009	93.9077
21	385.876	1856.59	6.14278	249.28	538.102	78.9315	45.014	20.5418	494.09	1.00009	93.9381
21.2	385.815	1856.61	6.13553	249.32	538.094	78.937	44.9017	20.6961	494.059	1.00009	93.9688
21.4	385.753	1856.63	6.12828	249.359	538.086	78.9424	44.7891	20.851	494.027	1.00009	93.9995
21.6	385.691	1856.65	6.12099	249.399	538.076	78.9477	44.6757	21.0074	493.994	1.00009	94.0304
21.8	385.628	1856.66	6.11367	249.439	538.067	78.953	44.5618	21.1649	493.961	1.00009	94.0613
22	385.564	1856.68	6.10634	249.479	538.057	78.9581	44.4474	21.3232	493.927	1.00009	94.0923
22.2	385.499	1856.68	6.09898	249.519	538.046	78.9631	44.3321	21.4833	493.893	1.0001	94.1235
22.4	385.434	1856.69	6.0916	249.558	538.034	78.9681	44.2166	21.644	493.859	1.0001	94.1546
22.6	385.368	1856.69	6.0842	249.598	538.022	78.9729	44.1004	21.8061	493.824	1.0001	94.1859
22.8	385.302	1856.69	6.07677	249.638	538.01	78.9776	43.9837	21.9693	493.789	1.0001	94.2172
23	385.236	1856.68	6.06934	249.677	537.997	78.9823	43.8666	22.1333	493.754	1.0001	94.2486
23.2	385.169	1856.68	6.06187	249.717	537.983	78.9868	43.7488	22.2989	493.718	1.0001	94.2801
23.4	385.101	1856.67	6.05439	249.757	537.969	78.9912	43.6307	22.4651	493.682	1.0001	94.3116
23.6	385.033	1856.65	6.04689	249.796	537.954	78.9955	43.512	22.6327	493.646	1.0001	94.3432
23.8	384.965	1856.64	6.03938	249.836	537.938	78.9997	43.3929	22.8013	493.61	1.0001	94.3749
24	384.897	1856.62	6.03185	249.875	537.922	79.0038	43.2735	22.9706	493.573	1.0001	94.4065
24.2	384.828	1856.6	6.0243	249.914	537.906	79.0077	43.1534	23.1416	493.537	1.0001	94.4383
24.4	384.759	1856.58	6.01674	249.954	537.889	79.0116	43.0331	23.3131	493.5	1.00011	94.4701
24.6	384.69	1856.56	6.00916	249.993	537.871	79.0153	42.9123	23.4858	493.463	1.00011	94.5019
24.8	384.62	1856.53	6.00156	250.032	537.853	79.0189	42.7911	23.6597	493.426	1.00011	94.5337
25	384.551	1856.5	5.99396	250.071	537.834	79.0224	42.6696	23.8342	493.39	1.00011	94.5656
25.2	384.481	1856.47	5.98633	250.11	537.814	79.0257	42.5476	24.0103	493.353	1.00011	94.5976
25.4	384.411	1856.43	5.97869	250.149	537.794	79.029	42.4253	24.187	493.316	1.00011	94.6295
25.6	384.341	1856.4	5.97104	250.188	537.774	79.0321	42.3026	24.3648	493.279	1.00011	94.6616
25.8	384.271	1856.36	5.96337	250.226	537.752	79.0351	42.1794	24.5439	493.242	1.00011	94.6936
26	384.201	1856.32	5.95569	250.265	537.731	79.0379	42.0561	24.7236	493.206	1.00011	94.7257
26.2	384.13	1856.28	5.94799	250.304	537.708	79.0407	41.9322	24.9048	493.169	1.00011	94.7578
26.4	384.06	1856.23	5.94028	250.342	537.685	79.0432	41.808	25.0868	493.133	1.00011	94.7899
26.6	383.99	1856.19	5.93255	250.381	537.662	79.0457	41.6836	25.2696	493.096	1.00012	94.8221
26.8	383.92	1856.14	5.9248	250.419	537.637	79.048	41.5586	25.4541	493.06	1.00012	94.8543
27	383.85	1856.09	5.91705	250.457	537.612	79.0502	41.4334	25.6392	493.024	1.00012	94.8865
27.2	383.779	1856.04	5.90927	250.496	537.587	79.0523	41.3078	25.8255	492.988	1.00012	94.9188
27.4	383.709	1855.99	5.90147	250.534	537.561	79.0542	41.1818	26.0131	492.953	1.00012	94.9511
27.6	383.639	1855.93	5.89367	250.572	537.534	79.056	41.0555	26.2015	492.917	1.00012	94.9834
27.8	383.569	1855.87	5.88583	250.61	537.507	79.0576	40.9288	26.3913	492.882	1.00012	95.0158
28	383.499	1855.82	5.87799	250.647	537.479	79.0591	40.8017	26.5823	492.847	1.00012	95.0482
28.2	383.429	1855.76	5.87012	250.685	537.45	79.0604	40.6743	26.774	492.812	1.00012	95.0807
28.4	383.36	1855.69	5.86223	250.723	537.421	79.0616	40.5463	26.9676	492.777	1.00012	95.1132
28.6	383.29	1855.63	5.85432	250.761	537.391	79.0626	40.418	27.1621	492.743	1.00013	95.1458
28.8	383.22	1855.57	5.84639	250.798	537.36	79.0635	40.2893	27.3577	492.708	1.00013	95.1784
29	383.151	1855.5	5.83843	250.836	537.328	79.0642	40.16	27.555	492.675	1.00013	95.2111
29.2	383.082	1855.43	5.83045	250.873	537.296	79.0648	40.0305	27.7533	492.641	1.00013	95.2438
29.4	383.012	1855.37	5.82244	250.911	537.264	79.0652	39.9004	27.9531	492.608	1.00013	95.2766
29.6	382.943	1855.3	5.81439	250.948	537.23	79.0654	39.7697	28.1545	492.574	1.00013	95.3094
29.8	382.874	1855.22	5.80633	250.986	537.196	79.0655	39.6387	28.3569	492.542	1.00013	95.3424
30	382.805	1855.15	5.79823	251.023	537.161	79.0653	39.507	28.5613	492.509	1.00013	95.3754
30.2	382.736	1855.08	5.7901	251.06	537.125	79.065	39.3747	28.7671	492.477	1.00013	95.4085
30.4	382.667	1855	5.78194	251.097	537.089	79.0646	39.2421	28.9741	492.445	1.00013	95.4417
30.6	382.599	1854.92	5.77373	251.135	537.051	79.064	39.1086	29.1833	492.413	1.00013	95.475
30.8	382.53	1854.85	5.7655	251.172	537.013	79.0631	38.9747	29.394	492.382	1.00014	95.5084
31	382.461	1854.77	5.75723	251.209	536.974	79.0622	38.8403	29.6058	492.35	1.00014	95.5419
31.2	382.393	1854.69	5.74891	251.246	536.934	79.0609	38.7049	29.8203	492.32	1.00014	95.5755
31.4	382.325	1854.61	5.74056	251.283	536.894	79.0595	38.5691	30.036	492.289	1.00014	95.6092
31.6	382.256	1854.52	5.73217	251.32	536.852	79.058	38.4327	30.2533	492.259	1.00014	95.643
31.8	382.188	1854.44	5.72373	251.357	536.81	79.0561	38.2954	30.4731	492.229	1.00014	95.677
32	382.12	1854.35	5.71525	251.394	536.766	79.0542	38.1576	30.6942	492.2	1.00014	95.711
32.2	382.052	1854.27	5.70674	251.431	536.722	79.052	38.0192	30.917	492.171	1.00014	95.7452
32.4	381.984	1854.18	5.69816	251.468	536.677	79.0495	37.8799	31.1423	492.142	1.00014	95.7795
32.6	381.917	1854.09	5.68956	251.505	536.631	79.0469	37.7401	31.3691	492.114	1.00014	95.8138
32.8	381.849	1854	5.68091	251.542	536.584	79.044	37.5996	31.5977	492.085	1.00014	95.8484
33	381.781	1853.91	5.67221	251.578	536.536	79.0409	37.4583	31.8287	492.058	1.00015	95.883
33.2	381.714	1853.82	5.66348	251.615	536.487	79.0376	37.3165	32.0612	492.03	1.00015	95.9178
33.4	381.647	1853.73	5.6547	251.652	536.438	79.0341	37.174	32.2956	492.004	1.00015	95.9526
33.6	381.58	1853.64	5.64586	251.688	536.387	79.0303	37.0307	32.5324	491.977	1.00015	95.9876
33.8	381.513	1853.55	5.637	251.725	536.335	79.0262	36.8869	32.7706	491.951	1.00015	96.0227
34	381.446	1853.45	5.62808	251.762	536.282	79.022	36.7424	33.0109	491.925	1.00015	96.0579
34.2	381.379	1853.36	5.61912	251.798	536.228	79.0174	36.5972	33.2534	491.9	1.00015	96.0932
34.4	381.313	1853.26	5.61013	251.834	536.174	79.0126	36.4515	33.4974	491.875	1.00015	96.1286
34.6	381.246	1853.17	5.6011	251.871	536.118	79.0076	36.3053	33.7432	491.85	1.00015	96.1641
34.8	381.18	1853.07	5.59201	251.907	536.061	79.0023	36.1583	33.9913	491.826	1.00015	96.1997
35	381.114	1852.97	5.58291	251.943	536.003	78.9967	36.011	34.2408	491.803	1.00015	96.2353
35.2	381.048	1852.88	5.57376	251.979	535.944	78.9909	35.8632	34.492	491.78	1.00016	96.271
35.4	380.983	1852.78	5.56457	252.014	535.884	78.9848	35.7147	34.7454	491.757	1.00016	96.3068
35.6	380.918	1852.68	5.55536	252.05	535.824	78.9785	35.566	35	491.735	1.00016	96.3427
35.8	380.853	1852.58	5.54612	252.085	535.762	78.9718	35.4169	35.2561	491.713	1.00016	96.3786
36	380.788	1852.48	5.53684	252.121	535.699	78.9649	35.2672	35.5144	491.692	1.00016	96.4145
36.2	380.723	1852.38	5.52754	252.156	535.635	78.9577	35.1174	35.7737	491.671	1.00016	96.4505
36.4	380.659	1852.28	5.51822	252.19	535.57	78.9503	34.9672	36.0344	491.65	1.00016	96.4865
36.6	380.595	1852.19	5.50887	252.225	535.504	78.9425	34.8167	36.2971	491.63	1.00016	96.5225
36.8	380.532	1852.09	5.49949	252.26	535.437	78.9344	34.6659	36.5609	491.611	1.00016	96.5586
37	380.468	1851.99	5.49011	252.294	535.37	78.9262	34.515	36.8257	491.592	1.00016	96.5946
37.2	380.405	1851.89	5.48069	252.328	535.301	78.9175	34.3637	37.0925	491.574	1.00017	96.6307
37.4	380.343	1851.79	5.47126	252.361	535.231	78.9086	34.2124	37.3603	491.556	1.00017	96.6667
37.6	380.28	1851.69	5.46181	252.395	535.16	78.8994	34.0608	37.6291	491.538	1.00017	96.7028
37.8	380.218	1851.59	5.45235	252.428	535.089	78.8899	33.9091	37.8995	491.521	1.00017	96.7388
38	380.156	1851.49	5.44287	252.461	535.016	78.8801	33.7573	38.171	491.504	1.00017	96.7748
38.2	380.095	1851.4	5.43338	252.494	534.942	78.8701	33.6054	38.4435	491.488	1.00017	96.8108
38.4	380.034	1851.3	5.42387	252.526	534.867	78.8597	33.4534	38.7173	491.473	1.00017	96.8468
38.6	379.973	1851.2	5.41435	252.558	534.792	78.849	33.3013	38.9923	491.458	1.00017	96.8827
38.8	379.912	1851.1	5.40482	252.59	534.715	78.838	33.1492	39.2681	491.443	1.00017	96.9186
39	379.852	1851.01	5.39528	252.622	534.638	78.8268	32.997	39.5451	491.428	1.00017	96.9545
39.2	379.792	1850.91	5.38573	252.653	534.559	78.8151	32.8448	39.8233	491.415	1.00017	96.9903
39.4	379.732	1850.82	5.37617	252.684	534.479	78.8033	32.6925	40.1024	491.401	1.00018	97.0261
39.6	379.673	1850.72	5.3666	252.714	534.399	78.7911	32.5403	40.3824	491.388	1.00018	97.0618
39.8	379.614	1850.63	5.35702	252.744	534.317	78.7786	32.388	40.6637	491.376	1.00018	97.0975
40	379.555	1850.53	5.34743	252.774	534.235	78.7657	32.2357	40.9459	491.363	1.00018	97.1332
40.2	379.496	1850.44	5.33784	252.804	534.151	78.7526	32.0834	41.2289	491.352	1.00018	97.1688
40.4	379.438	1850.34	5.32823	252.833	534.067	78.7392	31.9311	41.5132	491.34	1.00018	97.2043
40.6	379.379	1850.25	5.31862	252.862	533.981	78.7254	31.7788	41.7985	491.329	1.00018	97.2398
40.8	379.322	1850.16	5.309	252.891	533.895	78.7113	31.6266	42.0845	491.319	1.00018	97.2753
41	379.264	1850.07	5.29937	252.919	533.807	78.6969	31.4743	42.3716	491.309	1.00018	97.3107
41.2	379.206	1849.98	5.28972	252.947	533.719	78.6822	31.322	42.66	491.299	1.00018	97.3461
41.4	379.149	1849.89	5.28008	252.974	533.629	78.6671	31.1697	42.9491	491.289	1.00018	97.3814
41.6	379.092	1849.8	5.27042	253.002	533.539	78.6518	31.0174	43.2391	491.28	1.00019	97.4166
41.8	379.035	1849.71	5.26075	253.028	533.447	78.636	30.8651	43.5305	491.271	1.00019	97.4519
42	378.978	1849.62	5.25107	253.055	533.354	78.6199	30.7128	43.8227	491.263	1.00019	97.487
42.2	378.922	1849.53	5.24138	253.081	533.261	78.6036	30.5605	44.1158	491.255	1.00019	97.5221
42.4	378.865	1849.45	5.23169	253.107	533.166	78.5868	30.4082	44.41	491.247	1.00019	97.5572
42.6	378.809	1849.36	5.22198	253.132	533.07	78.5697	30.2559	44.7054	491.239	1.00019	97.5922
42.8	378.753	1849.27	5.21226	253.157	532.973	78.5523	30.1036	45.0016	491.232	1.00019	97.6272
43	378.697	1849.19	5.20253	253.182	532.875	78.5346	29.9512	45.2987	491.225	1.00019	97.6621
43.2	378.641	1849.1	5.19279	253.206	532.776	78.5164	29.7989	45.5973	491.218	1.00019	97.697
43.4	378.585	1849.02	5.18303	253.23	532.675	78.4979	29.6465	45.8967	491.212	1.00019	97.7319
43.6	378.529	1848.94	5.17327	253.253	532.574	78.4791	29.4941	46.1971	491.205	1.0002	97.7666
43.8	378.473	1848.86	5.16349	253.276	532.471	78.4599	29.3417	46.4987	491.2	1.0002	97.8014
44	378.418	1848.78	5.1537	253.299	532.368	78.4403	29.1892	46.8015	491.194	1.0002	97.8361
44.2	378.362	1848.69	5.1439	253.321	532.263	78.4204	29.0367	47.1052	491.188	1.0002	97.8708
44.4	378.306	1848.61	5.13408	253.343	532.157	78.4002	28.8841	47.4099	491.183	1.0002	97.9054
44.6	378.251	1848.54	5.12425	253.364	532.05	78.3794	28.7315	47.7161	491.178	1.0002	97.94
44.8	378.195	1848.46	5.1144	253.385	531.941	78.3583	28.5788	48.0234	491.173	1.0002	97.9745
45	378.14	1848.38	5.10454	253.406	531.832	78.3369	28.4261	48.3316	491.168	1.0002	98.009
45.2	378.084	1848.3	5.09466	253.426	531.721	78.3151	28.2732	48.6411	491.164	1.0002	98.0435
45.4	378.028	1848.23	5.08475	253.446	531.609	78.2928	28.1203	48.952	491.16	1.0002	98.078
45.6	377.973	1848.15	5.07484	253.466	531.496	78.2702	27.9672	49.2641	491.155	1.0002	98.1124
45.8	377.917	1848.08	5.0649	253.485	531.381	78.2472	27.8141	49.5772	491.151	1.00021	98.1468
46	377.861	1848	5.05494	253.503	531.265	78.2238	27.6608	49.8918	491.148	1.00021	98.1811
46.2	377.805	1847.93	5.04496	253.521	531.148	78.1999	27.5073	50.2079	491.144	1.00021	98.2155
46.4	377.749	1847.86	5.03496	253.539	531.029	78.1756	27.3537	50.5251	491.14	1.00021	98.2498
46.6	377.693	1847.78	5.02494	253.556	530.91	78.151	27.2	50.8435	491.137	1.00021	98.2841
46.8	377.636	1847.71	5.01489	253.573	530.788	78.1258	27.0461	51.1638	491.133	1.00021	98.3184
47	377.58	1847.64	5.00481	253.59	530.665	78.1001	26.8919	51.4855	491.13	1.00021	98.3526
47.2	377.523	1847.57	4.99471	253.606	530.541	78.0741	26.7376	51.8084	491.127	1.00021	98.3869
47.4	377.467	1847.5	4.98459	253.621	530.416	78.0477	26.583	52.1328	491.124	1.00021	98.4212
47.6	377.41	1847.43	4.97442	253.636	530.288	78.0207	26.4282	52.4592	491.121	1.00021	98.4554
47.8	377.352	1847.37	4.96423	253.651	530.16	77.9933	26.2731	52.7871	491.118	1.00021	98.4897
48	377.295	1847.3	4.954	253.665	530.03	77.9654	26.1177	53.1165	491.115	1.00022	98.524
48.2	377.237	1847.23	4.94375	253.679	529.898	77.937	25.962	53.4476	491.113	1.00022	98.5582
48.4	377.179	1847.16	4.93344	253.692	529.764	77.9081	25.8059	53.7809	491.11	1.00022	98.5925
48.6	377.121	1847.1	4.92311	253.704	529.629	77.8787	25.6495	54.1157	491.107	1.00022	98.6268
48.8	377.063	1847.03	4.91274	253.716	529.493	77.8488	25.4929	54.4521	491.105	1.00022	98.6612
49	377.004	1846.97	4.90233	253.728	529.354	77.8184	25.3358	54.7905	491.102	1.00022	98.6955
49.2	376.945	1846.9	4.89188	253.739	529.214	77.7874	25.1784	55.131	491.1	1.00022	98.7299
49.4	376.886	1846.84	4.8814	253.75	529.072	77.7559	25.0206	55.4731	491.097	1.00022	98.7642
49.6	376.826	1846.78	4.87087	253.76	528.929	77.724	24.8626	55.8169	491.095	1.00022	98.7986
49.8	376.766	1846.71	4.86031	253.77	528.783	77.6914	24.7041	56.1627	491.092	1.00022	98.833
50	376.706	1846.65	4.8497	253.779	528.636	77.6583	24.5453	56.5106	491.09	1.00023	98.8674
50.2	376.645	1846.59	4.83906	253.787	528.487	77.6246	24.3862	56.86	491.087	1.00023	98.9018
50.4	376.585	1846.53	4.82838	253.795	528.337	77.5905	24.2269	57.211	491.085	1.00023	98.9362
50.6	376.523	1846.46	4.81767	253.803	528.184	77.5557	24.0672	57.564	491.083	1.00023	98.9706
50.8	376.462	1846.4	4.80691	253.809	528.03	77.5203	23.9073	57.9188	491.08	1.00023	99.005
51	376.4	1846.34	4.79613	253.816	527.874	77.4845	23.7471	58.275	491.078	1.00023	99.0393
51.2	376.338	1846.28	4.78532	253.821	527.716	77.4481	23.5868	58.6326	491.076	1.00023	99.0737
51.4	376.275	1846.22	4.77448	253.826	527.557	77.4111	23.4264	58.9918	491.073	1.00023	99.108
51.6	376.213	1846.17	4.76361	253.831	527.396	77.3736	23.2658	59.3524	491.071	1.00023	99.1422
51.8	376.15	1846.11	4.75272	253.834	527.233	77.3355	23.1053	59.7141	491.068	1.00023	99.1764
52	376.087	1846.05	4.74182	253.837	527.069	77.297	22.9447	60.0768	491.066	1.00023	99.2105
52.2	376.023	1845.99	4.7309	253.84	526.903	77.258	22.7843	60.4405	491.064	1.00024	99.2445
52.4	375.959	1845.94	4.71997	253.842	526.735	77.2183	22.624	60.8049	491.061	1.00024	99.2784
52.6	375.896	1845.88	4.70903	253.843	526.566	77.1783	22.464	61.1699	491.059	1.00024	99.3122
52.8	375.832	1845.82	4.6981	253.843	526.396	77.1378	22.3043	61.5352	491.057	1.00024	99.3458
53	375.768	1845.77	4.68718	253.843	526.225	77.0968	22.145	61.9006	491.054	1.00024	99.3793
53.2	375.704	1845.71	4.67627	253.842	526.052	77.0554	21.9863	62.2659	491.052	1.00024	99.4126
53.4	375.64	1845.66	4.66539	253.84	525.879	77.0136	21.8283	62.6308	491.05	1.00024	99.4456
53.6	375.576	1845.6	4.65453	253.838	525.704	76.9714	21.6709	62.9952	491.047	1.00024	99.4785
53.8	375.511	1845.55	4.6437	253.835	525.529	76.9289	21.5142	63.3589	491.045	1.00024	99.5111
54	375.448	1845.5	4.63291	253.831	525.353	76.886	21.3587	63.7214	491.043	1.00024	99.5434
54.2	375.384	1845.44	4.62217	253.827	525.175	76.8428	21.204	64.0829	491.041	1.00024	99.5754
54.4	375.32	1845.39	4.61146	253.822	524.998	76.7992	21.0502	64.4432	491.038	1.00025	99.6072
54.6	375.256	1845.34	4.6008	253.816	524.819	76.7554	20.8974	64.8024	491.036	1.00025	99.6387
54.8	375.193	1845.29	4.59019	253.81	524.64	76.7113	20.7458	65.1599	491.034	1.00025	99.6699
55	375.129	1845.24	4.57964	253.802	524.461	76.6668	20.5953	65.5158	491.032	1.00025	99.7007
55.2	375.066	1845.19	4.56913	253.794	524.28	76.6221	20.4458	65.8704	491.03	1.00025	99.7313
55.4	375.003	1845.14	4.55866	253.785	524.099	76.5771	20.2972	66.2237	491.028	1.00025	99.7615
55.6	374.94	1845.09	4.54825	253.776	523.917	76.5317	20.1499	66.5752	491.026	1.00025	99.7914
55.8	374.877	1845.04	4.53789	253.766	523.735	76.486	20.0036	66.9252	491.024	1.00025	99.821
56	374.814	1844.99	4.52756	253.754	523.551	76.44	19.8583	67.274	491.023	1.00025	99.8504
56.2	374.752	1844.94	4.51727	253.743	523.367	76.3936	19.7138	67.6217	491.021	1.00025	99.8794
56.4	374.689	1844.89	4.50701	253.73	523.182	76.3469	19.5702	67.9683	491.019	1.00025	99.9082
56.6	374.626	1844.84	4.49678	253.716	522.995	76.2996	19.4275	68.3139	491.018	1.00026	99.9366
56.8	374.564	1844.79	4.48656	253.702	522.807	76.2518	19.2855	68.659	491.017	1.00026	99.9649
57	374.501	1844.74	4.47634	253.686	522.617	76.2035	19.1439	69.0039	491.016	1.00026	99.9929
57.2	374.438	1844.69	4.46612	253.67	522.425	76.1546	19.0026	69.3487	491.014	1.00026	100.021
57.4	374.374	1844.65	4.45588	253.653	522.231	76.1049	18.8617	69.6942	491.013	1.00026	100.048
57.6	374.31	1844.59	4.44558	253.634	522.033	76.0543	18.7206	70.041	491.013	1.00026	100.076
57.8	374.246	1844.54	4.43523	253.614	521.833	76.0027	18.5792	70.3895	491.012	1.00026	100.103
58	374.18	1844.49	4.42479	253.593	521.629	75.9501	18.4373	70.7405	491.012	1.00026	100.131
58.2	374.114	1844.44	4.41425	253.57	521.42	75.8963	18.2945	71.0946	491.011	1.00026	100.158
58.4	374.046	1844.39	4.4035	253.545	521.204	75.8404	18.1498	71.455	491.012	1.00026	100.186
58.6	373.977	1844.33	4.39254	253.519	520.982	75.7826	18.0029	71.8219	491.012	1.00027	100.213
58.8	373.906	1844.27	4.38131	253.49	520.751	75.7226	17.8531	72.1971	491.013	1.00027	100.241
59	373.832	1844.21	4.36974	253.459	520.51	75.6598	17.6997	72.5826	491.014	1.00027	100.27
59.2	373.754	1844.15	4.35768	253.424	520.255	75.5932	17.5408	72.9833	491.015	1.00027	100.299
59.4	373.672	1844.08	4.3449	253.385	519.98	75.5212	17.3738	73.4064	491.017	1.00027	100.33
59.6	373.584	1844	4.33136	253.34	519.684	75.4436	17.1981	73.853	491.02	1.00027	100.361
59.8	373.49	1843.92	4.31689	253.29	519.362	75.3591	17.0118	74.3281	491.024	1.00027	100.394
60	373.388	1843.83	4.30131	253.233	519.01	75.2663	16.8128	74.8376	491.029	1.00027	100.429
60.2	373.272	1843.72	4.28389	253.163	518.606	75.1599	16.5929	75.4034	491.035	1.00027	100.467
60.4	373.141	1843.59	4.26418	253.079	518.138	75.0363	16.3472	76.0384	491.044	1.00027	100.508
60.6	372.99	1843.45	4.24175	252.975	517.593	74.8921	16.0712	76.7551	491.057	1.00027	100.553
60.8	372.814	1843.27	4.21586	252.847	516.947	74.721	15.757	77.5747	491.073	1.00028	100.602
61	372.607	1843.05	4.18561	252.686	516.172	74.5157	15.3954	78.5223	491.095	1.00028	100.658
61.2	372.341	1842.76	4.14733	252.459	515.151	74.2444	14.9487	79.7015	491.129	1.00028	100.723
61.4	372.012	1842.38	4.10061	252.156	513.857	73.8996	14.4167	81.1153	491.178	1.00028	100.795
61.6	371.612	1841.89	4.04427	251.755	512.232	73.4659	13.792	82.7871	491.246	1.00028	100.874
61.8	371.132	1841.27	3.97731	251.234	510.223	72.9276	13.0702	84.7326	491.338	1.00028	100.958
62	370.565	1840.5	3.89895	250.568	507.772	72.2682	12.2511	86.9572	491.461	1.00028	101.043
62.2	369.903	1839.53	3.80823	249.694	504.755	71.4494	11.3482	89.4366	491.627	1.00028	101.118
62.4	369.205	1838.44	3.71274	248.684	501.421	70.5377	10.4362	91.9592	491.823	1.00028	101.176
62.6	368.483	1837.25	3.61437	247.546	497.822	69.5462	9.53596	94.4604	492.045	1.00028	101.213
62.8	367.746	1835.96	3.51419	246.282	493.978	68.4808	8.6602	96.8978	492.295	1.00028	101.228
63	366.992	1834.56	3.41226	244.882	489.874	67.3369	7.81266	99.2512	492.573	1.00028	101.216
63.2	366.217	1833	3.30816	243.291	485.41	66.0865	7.00537	101.464	492.892	1.00028	101.166
63.4	365.425	1831.31	3.20248	241.538	480.65	64.7499	6.232	103.541	493.246	1.00028	101.084
63.6	364.617	1829.49	3.09524	239.613	475.578	63.3237	5.49461	105.461	493.637	1.00028	100.966
63.8	363.791	1827.52	2.98651	237.504	470.175	61.8046	4.79525	107.204	494.067	1.00028	100.809
64	362.947	1825.39	2.87632	235.196	464.421	60.1883	4.1364	108.742	494.543	1.00028	100.61
64.2	362.08	1823.02	2.76439	232.605	458.173	58.4409	3.53368	109.966	495.084	1.00028	100.348
64.4	361.193	1820.47	2.65128	229.778	451.521	56.5907	2.97618	110.914	495.682	1.00029	100.034
64.6	360.287	1817.71	2.53712	226.699	444.443	54.6366	2.46534	111.556	496.344	1.00029	99.6637
64.8	359.362	1814.71	2.42206	223.353	436.918	52.5782	2.00241	111.866	497.076	1.00029	99.2319
65	358.416	1811.48	2.30625	219.724	428.924	50.4157	1.5884	111.816	497.886	1.00029	98.7346
65.2	357.442	1807.88	2.18983	215.702	420.29	48.1236	1.23791	111.257	498.813	1.00029	98.1447
65.4	356.444	1803.94	2.0732	211.338	411.104	45.7331	0.937953	110.255	499.851	1.00029	97.473
65.6	355.409	1799.54	1.95572	206.585	401.275	43.2381	0.684508	108.787	501.029	1.00029	96.7101
65.8	354.312	1794.45	1.83627	201.357	390.631	40.6221	0.475166	106.801	502.401	1.00029	95.8379
66	353.137	1788.47	1.71436	195.583	379.044	37.8805	0.308217	104.255	504.018	1.00029	94.8406
66.2	351.966	1781.89	1.59712	189.427	366.929	35.1401	0.196233	101.151	505.838	1.00029	93.7302
66.4	350.804	1774.77	1.48499	182.991	354.46	32.4509	0.121082	97.638	507.831	1.00029	92.5254
66.6	349.644	1767.13	1.37758	176.337	341.722	29.8342	0.070695	93.8188	509.978	1.00029	91.2384
66.8	348.483	1758.92	1.27488	169.497	328.765	27.3104	0.0386968	89.7498	512.276	1.00029	89.8729
67	347.309	1750.03	1.17661	162.485	315.597	24.8928	0.0196632	85.4728	514.735	1.00029	88.428
67.2	346.09	1739.97	1.08196	155.233	302.076	22.5889	0.00956219	80.9736	517.439	1.00029	86.8807
67.4	344.714	1726.99	0.987736	147.461	287.627	20.3681	0.00463388	76.1115	520.693	1.00029	85.1537
67.6	343.288	1712.19	0.897761	139.531	272.952	18.2994	0.00210066	71.1243	524.28	1.00029	83.3204
67.8	341.841	1695.97	0.812958	131.536	258.224	16.3991	0.000924505	66.0808	528.127	1.00029	81.3939
68	340.396	1678.77	0.733753	123.54	243.563	14.6701	0.000405215	61.0359	532.138	1.00029	79.3843
68.2	338.976	1661.04	0.660392	115.599	229.072	13.1084	0.000179286	56.042	536.185	1.00029	77.3025
68.4	337.61	1643.31	0.594587	107.835	214.977	11.7437	9.13307e-05	51.2124	540.025	1.00029	75.1579
68.6	336.302	1625.96	0.534775	100.297	201.338	10.5233	4.55813e-05	46.5902	543.522	1.00028	72.9903
68.8	335.054	1609.11	0.48055	93.03	188.216	9.43178	2.24663e-05	42.2098	546.601	1.00028	70.8206
69	333.868	1592.86	0.431593	86.0727	175.666	8.4577	1.10521e-05	38.0987	549.206	1.00028	68.6668
69.2	332.743	1577.25	0.387532	79.4547	163.724	7.58967	5.45129e-06	34.2745	551.302	1.00028	66.545
69.4	331.681	1562.34	0.34835	73.2312	152.472	6.82485	2.82048e-06	30.7742	552.817	1.00028	64.4738
69.6	330.681	1548.1	0.313637	67.4251	141.932	6.15264	1.53236e-06	27.6049	553.723	1.00028	62.4674
69.8	329.729	1534.4	0.282273	61.9681	131.98	5.54881	8.14013e-07	24.7034	554.12	1.00028	60.5214
70	328.821	1521.2	0.253935	56.8526	122.597	5.00606	4.26191e-07	22.0561	554.023	1.00028	58.6388
70.2	327.955	1508.46	0.228327	52.069	113.764	4.5179	2.20752e-07	19.6486	553.448	1.00028	56.8213
70.4	327.128	1496.16	0.205182	47.6068	105.461	4.07849	1.13304e-07	17.466	552.412	1.00028	55.0698
70.6	326.344	1484.35	0.184638	43.5112	97.7631	3.68997	6.19731e-08	15.5299	550.855	1.00028	53.3971
70.8	325.595	1472.94	0.166118	39.723	90.5716	3.34065	3.37857e-08	13.7915	548.865	1.00028	51.7926
71	324.878	1461.88	0.149304	36.2068	83.8302	3.02406	1.79716e-08	12.2225	546.494	1.00028	50.2497
71.2	324.189	1451.15	0.134041	32.949	77.5175	2.73705	9.36642e-09	10.8094	543.764	1.00028	48.7658
71.4	323.529	1440.72	0.120189	29.9357	71.6125	2.47675	4.7923e-09	9.53937	540.697	1.00028	47.3383
71.6	322.894	1430.59	0.10762	27.1532	66.0941	2.24058	2.40858e-09	8.40024	537.315	1.00028	45.9639
71.8	322.29	1420.81	0.0964775	24.6383	61.0277	2.03096	1.31114e-09	7.40688	533.572	1.00028	44.6509
72	321.708	1411.27	0.0863388	22.3188	56.2947	1.83989	6.88588e-10	6.5159	529.57	1.00028	43.382
72.2	321.147	1401.97	0.0771169	20.1819	51.8754	1.66566	3.50177e-10	5.71796	525.329	1.00028	42.1536
72.4	320.607	1392.89	0.0687345	18.2159	47.7519	1.50674	1.72797e-10	5.00467	520.868	1.00029	40.9623
72.6	320.085	1384.01	0.061121	16.4095	43.9068	1.36178	8.27527e-11	4.36825	516.205	1.00029	39.8044
72.8	319.581	1375.34	0.0542305	14.7559	40.331	1.22987	3.90291e-11	3.80334	511.351	1.00029	38.6776
73	319.098	1366.88	0.0481045	13.2672	37.0487	1.11165	1.97178e-11	3.3128	506.299	1.00029	37.5821
73.2	318.629	1358.59	0.0425377	11.901	33.9873	1.00338	9.44672e-12	2.87566	501.102	1.00029	36.508
73.4	318.175	1350.43	0.0374859	10.6487	31.133	0.904239	4.30267e-12	2.48696	495.774	1.00029	35.4525
73.6	317.733	1342.41	0.0329082	9.5024	28.4728	0.81346	1.86098e-12	2.14208	490.327	1.00029	34.4125
73.8	317.304	1334.51	0.0287666	8.45428	25.9944	0.730343	7.61346e-13	1.8368	484.772	1.00029	33.3852
74	316.886	1326.71	0.0250384	7.49992	23.6912	0.654459	3.00645e-13	1.56827	479.116	1.00029	32.3681
74.2	316.481	1319.01	0.0217454	6.64502	21.5759	0.586156	1.29163e-13	1.3374	473.356	1.00029	31.3585
74.4	316.084	1311.37	0.0187756	5.86442	19.6026	0.523465	5.02467e-14	1.13374	467.518	1.00029	30.3518
74.6	315.695	1303.77	0.0161048	5.15274	17.7621	0.465951	1.7625e-14	0.954664	461.607	1.00029	29.3453
74.8	315.313	1296.18	0.0137104	4.50499	16.0457	0.413215	5.50229e-15	0.797788	455.628	1.00029	28.3363
75	314.936	1288.58	0.0115715	3.91649	14.4452	0.36489	1.49525e-15	0.660923	449.583	1.00029	27.322
75.2	314.564	1280.94	0.00967043	3.38324	12.9535	0.320664	3.46952e-16	0.542183	443.473	1.00029	26.2996
75.4	314.194	1273.18	0.00803288	2.91139	11.5838	0.280982	1.02243e-16	0.442814	437.282	1.00029	25.262
75.6	313.825	1265.26	0.00658958	2.4849	10.3048	0.244651	2.23518e-17	0.357184	431.021	1.00029	24.2074
75.8	313.454	1257.11	0.00532782	2.10093	9.11131	0.211461	3.51252e-18	0.284001	424.689	1.00029	23.1319
76	313.083	1248.75	0.00424133	1.75858	8.00477	0.181354	3.7458e-19	0.222334	418.351	1.00029	22.0373
76.2	312.716	1240.32	0.00332698	1.45824	6.99223	0.154386	2.81841e-20	0.171437	412.144	1.00029	20.9326
76.4	312.362	1232.07	0.00258054	1.20055	6.08349	0.130654	1.82328e-21	0.130545	406.269	1.00029	19.8332
76.6	312.024	1224.09	0.00200055	0.987168	5.28779	0.11037	3.18525e-22	0.0992972	400.871	1.00029	18.7463
76.8	311.7	1216.34	0.00153875	0.807046	4.58093	0.0927552	2.94186e-23	0.0747597	395.929	1.00029	17.6742
77	311.388	1208.81	0.00117066	0.65468	3.95124	0.0774258	1.93682e-24	0.0554771	391.435	1.00029	16.6192
77.2	311.088	1201.49	0.000880516	0.526668	3.39206	0.0641556	1.04116e-25	0.0405196	387.396	1.00029	15.5844
77.4	310.798	1194.38	0.000654451	0.419915	2.89726	0.0527347	4.78765e-27	0.0290834	383.805	1.00029	14.5729
77.6	310.518	1187.48	0.000480429	0.331611	2.46111	0.0429687	1.92531e-28	0.0204791	380.654	1.00029	13.5877
77.8	310.247	1180.79	0.000351106	0.260469	2.08289	0.0347992	2.01839e-29	0.0142777	377.959	1.00029	12.6349
78	309.985	1174.31	0.000256049	0.203787	1.75715	0.0280351	1.57238e-30	0.00988666	375.692	1.00029	11.7191
78.2	309.729	1168.01	0.000184145	0.157758	1.47289	0.0223497	7.07857e-32	0.00669333	373.765	1.00029	10.8387
78.4	309.479	1161.87	0.000130538	0.120809	1.22649	0.0176189	2.52069e-33	0.00442321	372.146	1.00029	9.99666
78.6	309.234	1155.94	9.12671e-05	0.0915888	1.01506	0.0137362	7.88581e-35	0.00285257	370.805	1.00029	9.19831
78.8	308.994	1150.21	6.29994e-05	0.0688185	0.835311	0.0105925	2.67201e-36	0.00179696	369.707	1.00029	8.44644
79	308.756	1144.63	4.27171e-05	0.051095	0.681962	0.00804962	6.74363e-38	0.00109813	368.803	1.00029	7.73458
79.2	308.513	1139.09	2.89625e-05	0.0378552	0.553699	0.0060653	1.07069e-38	0.000672464	368.074	1.00029	7.05811
79.4	308.27	1133.68	1.92656e-05	0.0277506	0.44603	0.00450043	3.51168e-40	0.000399419	367.471	1.00029	6.4249
79.6	308.025	1128.39	1.25262e-05	0.0201086	0.356164	0.00328035	7.73177e-42	0.000228822	366.969	1.00029	5.83399
79.8	307.777	1123.2	7.94328e-06	0.0144072	0.281814	0.00234475	1.37948e-43	0.000126113	366.546	1.00029	5.28465
80	307.526	1118.11	4.90046e-06	0.010212	0.22087	0.0016404	2.09879e-45	6.67019e-05	366.181	1.00029	4.77589

## Sheet: scenarios
depth	diag1	diag2	diag3	diag4
0	0	1	0	0
0.2	-5.81403e-05	0.999038	3.65175e-05	0.0148209
0.4	-0.000116281	0.998077	7.3035e-05	0.0296417
0.6	-0.000178801	0.997074	0.000113931	0.0460362
0.8	-0.000242082	0.996065	0.000155587	0.0627038
1	-0.000305362	0.995055	0.000197243	0.0793714
1.2	-0.000369737	0.994038	0.000240113	0.0964718
1.4	-0.000436201	0.993007	0.000285304	0.1144
1.6	-0.000502666	0.991976	0.000330496	0.132327
1.8	-0.000571121	0.990931	0.000378126	0.15112
2	-0.000640654	0.989878	0.000427078	0.17038
2.2	-0.000710205	0.988825	0.000476052	0.189648
2.4	-0.000782678	0.987751	0.000528973	0.210308
2.6	-0.000855151	0.986677	0.000581893	0.230967
2.8	-0.000928781	0.985595	0.000636538	0.252232
3	-0.00100406	0.984501	0.000693642	0.27436
3.2	-0.00107934	0.983408	0.000750747	0.296488
3.4	-0.00115694	0.982298	0.00081166	0.319948
3.6	-0.00123489	0.981187	0.000873169	0.343616
3.8	-0.00131376	0.980069	0.00093635	0.367867
4	-0.00139426	0.97894	0.00100249	0.393149
4.2	-0.00147475	0.977811	0.00106863	0.418431
4.4	-0.00155742	0.976667	0.00113913	0.445233
4.6	-0.00164032	0.975522	0.00121013	0.472204
4.8	-0.00172435	0.974369	0.0012835	0.500021
5	-0.00180959	0.973208	0.00135948	0.528761
5.2	-0.00189506	0.972045	0.00143593	0.557673
5.4	-0.00198265	0.970867	0.00151693	0.588262
5.6	-0.00207023	0.969688	0.00159793	0.618851
5.8	-0.00215949	0.968497	0.00168281	0.650881
6	-0.00224932	0.967302	0.00176901	0.683403
6.2	-0.00234009	0.9661	0.00185754	0.716795
6.4	-0.00243209	0.964888	0.00194911	0.751335
6.6	-0.00252441	0.963674	0.00204151	0.786193
6.8	-0.00261853	0.962446	0.00213859	0.82284
7	-0.00271264	0.961218	0.00223568	0.859487
7.2	-0.00280863	0.959975	0.00233783	0.898116
7.4	-0.00290482	0.958731	0.00244053	0.93696
7.6	-0.0030024	0.957475	0.00254714	0.977369
7.8	-0.00310064	0.956214	0.00265556	1.0185
8	-0.00319988	0.954944	0.00276682	1.06082
8.2	-0.00330016	0.953666	0.002881	1.10434
8.4	-0.00340112	0.952382	0.0029971	1.14868
8.6	-0.00350345	0.951085	0.00311709	1.19469
8.8	-0.0036062	0.949785	0.00323819	1.24121
9	-0.00371062	0.94847	0.00336396	1.2898
9.2	-0.00381523	0.947153	0.00349021	1.33863
9.4	-0.00392179	0.945818	0.00362171	1.38991
9.6	-0.00402836	0.944482	0.00375321	1.4412
9.8	-0.00413712	0.943126	0.00389036	1.49528
10	-0.0042459	0.941769	0.00402751	1.54937
10.2	-0.00435682	0.940392	0.00416983	1.60617
10.4	-0.00446789	0.939012	0.0043125	1.66316
10.6	-0.00458112	0.937611	0.00445997	1.72285
10.8	-0.00469459	0.936208	0.00460799	1.78286
11	-0.00481028	0.934781	0.00476054	1.84561
11.2	-0.00492628	0.933352	0.00491371	1.90874
11.4	-0.00504463	0.931898	0.0050712	1.97474
11.6	-0.0051633	0.93044	0.00522926	2.04111
11.8	-0.00528452	0.928955	0.0053915	2.11052
12	-0.00540601	0.927468	0.00555417	2.18025
12.2	-0.00553034	0.92595	0.00572091	2.25327
12.4	-0.00565486	0.92443	0.00588791	2.3265
12.6	-0.00578252	0.922876	0.0060588	2.40327
12.8	-0.00591049	0.921318	0.00623002	2.48038
13	-0.00604152	0.919728	0.00640448	2.56085
13.2	-0.00617321	0.91813	0.00657953	2.64203
13.4	-0.0063078	0.916501	0.00675717	2.7263
13.6	-0.0064435	0.91486	0.00693565	2.81174
13.8	-0.00658183	0.91319	0.00711612	2.89993
14	-0.00672179	0.911502	0.00729765	2.98981
14.2	-0.00686399	0.909791	0.00748066	3.08201
14.4	-0.00700837	0.908056	0.00766502	3.17652
14.6	-0.00715447	0.906303	0.00785042	3.27282
14.8	-0.00730332	0.904521	0.00803753	3.37212
15	-0.00745326	0.902728	0.00822531	3.47261
15.2	-0.00760648	0.900901	0.00841531	3.57685
15.4	-0.00776033	0.899067	0.00860577	3.68185
15.6	-0.00791741	0.897201	0.00879888	3.79089
15.8	-0.00807525	0.895328	0.0089928	3.90101
16	-0.00823539	0.893434	0.00918918	4.01438
16.2	-0.00839677	0.891528	0.00938716	4.1297
16.4	-0.0085597	0.889607	0.00958714	4.24746
16.6	-0.0087244	0.887672	0.00978949	4.36812
16.8	-0.00889005	0.885727	0.00999311	4.49036
17	-0.00905803	0.883762	0.0101998	4.61654
17.2	-0.00922661	0.881792	0.0104074	4.74375
17.4	-0.00939765	0.8798	0.0106182	4.87526
17.6	-0.00956951	0.877801	0.0108302	5.00826
17.8	-0.00974319	0.875787	0.0110446	5.14458
18	-0.00991827	0.873761	0.011261	5.28357
18.2	-0.0100945	0.871725	0.0114791	5.4248
18.4	-0.0102727	0.869674	0.0117001	5.56997
18.6	-0.0104516	0.867617	0.0119221	5.7164
18.8	-0.0106327	0.865542	0.0121477	5.86776
19	-0.0108146	0.863462	0.0123744	6.02066
19.2	-0.010998	0.86137	0.0126038	6.17724
19.4	-0.0111827	0.859268	0.0128355	6.33681
19.6	-0.0113684	0.85716	0.0130689	6.49872
19.8	-0.0115558	0.855039	0.0133057	6.66513
20	-0.0117438	0.852913	0.0135436	6.83307
20.2	-0.0119336	0.850776	0.0137852	7.00594
20.4	-0.0121242	0.848634	0.0140284	7.18102
20.6	-0.0123159	0.846484	0.0142742	7.35952
20.8	-0.0125089	0.844327	0.0145229	7.54194
21	-0.0127025	0.842165	0.0147729	7.72616
21.2	-0.0128978	0.839994	0.0150271	7.9161
21.4	-0.0130936	0.83782	0.0152827	8.10784
21.6	-0.0132906	0.835639	0.0155414	8.3038
21.8	-0.0134886	0.833453	0.0158028	8.50334
22	-0.0136872	0.831264	0.0160659	8.70531
22.2	-0.0138872	0.829067	0.0163331	8.91284
22.4	-0.0140877	0.826869	0.0166017	9.12235
22.6	-0.0142893	0.824666	0.0168738	9.33659
22.8	-0.0144917	0.822459	0.0171484	9.55436
23	-0.0146947	0.820249	0.0174249	9.77486
23.2	-0.0148989	0.818035	0.0177056	10.0011
23.4	-0.0151036	0.815818	0.0179877	10.2294
23.6	-0.0153092	0.813599	0.0182734	10.4627
23.8	-0.0155156	0.811376	0.0185616	10.6998
24	-0.0157225	0.809152	0.0188517	10.9395
24.2	-0.0159305	0.806924	0.0191461	11.1854
24.4	-0.0161389	0.804695	0.019442	11.4337
24.6	-0.0163482	0.802463	0.019741	11.6866
24.8	-0.0165582	0.80023	0.020043	11.944
25	-0.0167686	0.797994	0.0203466	12.2038
25.2	-0.0169801	0.795756	0.0206544	12.4702
25.4	-0.0171921	0.793517	0.020964	12.7393
25.6	-0.0174047	0.791275	0.0212761	13.0125
25.8	-0.0176182	0.789032	0.0215915	13.2911
26	-0.0178322	0.786787	0.0219085	13.5723
26.2	-0.018047	0.784539	0.0222289	13.8592
26.4	-0.0182625	0.78229	0.0225515	14.15
26.6	-0.0184785	0.780039	0.0228759	14.4439
26.8	-0.0186955	0.777785	0.0232039	14.7445
27	-0.018913	0.77553	0.0235335	15.0478
27.2	-0.0191313	0.773272	0.0238655	15.3558
27.4	-0.0193504	0.771011	0.0242001	15.669
27.6	-0.0195701	0.768748	0.0245362	15.9852
27.8	-0.0197907	0.766482	0.0248751	16.3072
28	-0.0200122	0.764212	0.0252158	16.6334
28.2	-0.0202341	0.761941	0.0255579	16.9625
28.4	-0.0204574	0.759664	0.025903	17.2988
28.6	-0.0206813	0.757385	0.0262492	17.6381
28.8	-0.020906	0.755102	0.0265971	17.9815
29	-0.0211319	0.752813	0.026947	18.331
29.2	-0.0213586	0.750521	0.027298	18.6836
29.4	-0.0215863	0.748223	0.0276506	19.0413
29.6	-0.0218153	0.745919	0.0280046	19.4042
29.8	-0.022045	0.743612	0.0283594	19.7703
30	-0.0222761	0.741297	0.0287156	20.1423
30.2	-0.0225084	0.738975	0.0290727	20.5186
30.4	-0.0227416	0.736649	0.0294303	20.8982
30.6	-0.0229765	0.734313	0.029789	21.2845
30.8	-0.0232126	0.73197	0.0301482	21.6744
31	-0.0234496	0.729623	0.0305077	22.0678
31.2	-0.0236886	0.727264	0.0308679	22.4681
31.4	-0.0239286	0.724899	0.0312282	22.8716
31.6	-0.0241699	0.722528	0.0315888	23.2791
31.8	-0.0244131	0.720146	0.0319496	23.693
32	-0.0246575	0.717757	0.0323103	24.1102
32.2	-0.0249032	0.715362	0.0326711	24.5317
32.4	-0.0251508	0.712955	0.0330318	24.9592
32.6	-0.0253996	0.710543	0.0333923	25.3901
32.8	-0.0256499	0.708123	0.0337526	25.8254
33	-0.0259021	0.705693	0.0341126	26.2665
33.2	-0.0261554	0.703258	0.0344724	26.7109
33.4	-0.0264103	0.700815	0.0348318	27.1599
33.6	-0.026667	0.698364	0.0351907	27.6145
33.8	-0.0269249	0.695908	0.0355494	28.0723
34	-0.0271843	0.693444	0.0359076	28.5348
34.2	-0.0274455	0.690974	0.0362653	29.0027
34.4	-0.0277078	0.6885	0.0366228	29.474
34.6	-0.0279715	0.68602	0.0369798	29.9497
34.8	-0.0282369	0.683535	0.0373364	30.4308
35	-0.0285034	0.681047	0.0376927	30.9152
35.2	-0.0287711	0.678556	0.0380488	31.404
35.4	-0.0290403	0.676062	0.0384046	31.8981
35.6	-0.0293105	0.673567	0.0387602	32.3956
35.8	-0.0295817	0.67107	0.0391158	32.897
36	-0.0298543	0.668573	0.0394713	33.404
36.2	-0.0301277	0.666075	0.0398269	33.9142
36.4	-0.030402	0.663579	0.0401825	34.4281
36.6	-0.0306776	0.661084	0.0405382	34.9476
36.8	-0.0309538	0.65859	0.0408942	35.4704
37	-0.0312308	0.656099	0.0412502	35.9965
37.2	-0.0315089	0.653611	0.0416067	36.5283
37.4	-0.0317876	0.651126	0.0419634	37.0634
37.6	-0.0320669	0.648645	0.0423204	37.6017
37.8	-0.0323471	0.646169	0.0426779	38.1451
38	-0.0326279	0.643697	0.0430358	38.6922
38.2	-0.0329092	0.641229	0.0433941	39.2424
38.4	-0.0331913	0.638768	0.043753	39.7972
38.6	-0.0334739	0.636312	0.0441124	40.356
38.8	-0.033757	0.633862	0.0444723	40.9178
39	-0.0340407	0.631418	0.0448327	41.4834
39.2	-0.0343249	0.628982	0.0451939	42.0536
39.4	-0.0346096	0.626552	0.0455555	42.6268
39.6	-0.0348947	0.624127	0.0459176	43.203
39.8	-0.0351804	0.621713	0.0462806	43.7843
40	-0.0354665	0.619304	0.0466441	44.3684
40.2	-0.035753	0.616902	0.0470081	44.9554
40.4	-0.03604	0.614509	0.0473728	45.5468
40.6	-0.0363275	0.612123	0.0477381	46.1415
40.8	-0.0366154	0.609744	0.0481038	46.7391
41	-0.0369037	0.607373	0.0484701	47.3401
41.2	-0.0371926	0.605012	0.0488371	47.9452
41.4	-0.0374819	0.602657	0.0492045	48.5529
41.6	-0.0377715	0.600309	0.0495723	49.1634
41.8	-0.0380618	0.597972	0.0499408	49.7782
42	-0.0383525	0.595642	0.0503098	50.3958
42.2	-0.0386435	0.593319	0.0506791	51.016
42.4	-0.0389351	0.591005	0.0510489	51.6397
42.6	-0.0392272	0.588701	0.0514193	52.2667
42.8	-0.0395197	0.586404	0.0517899	52.8963
43	-0.0398127	0.584113	0.0521609	53.5284
43.2	-0.0401063	0.581835	0.0525324	54.1646
43.4	-0.0404003	0.579564	0.0529042	54.8032
43.6	-0.0406948	0.5773	0.0532762	55.4442
43.8	-0.0409899	0.575045	0.0536486	56.0883
44	-0.0412855	0.5728	0.0540213	56.7356
44.2	-0.0415817	0.570563	0.0543941	57.3852
44.4	-0.0418783	0.568333	0.0547672	58.0371
44.6	-0.0421757	0.566114	0.0551404	58.6926
44.8	-0.0424737	0.563903	0.0555138	59.3504
45	-0.0427721	0.5617	0.0558872	60.0105
45.2	-0.0430712	0.559505	0.0562607	60.6731
45.4	-0.0433711	0.557321	0.0566342	61.3388
45.6	-0.0436716	0.555144	0.0570077	62.0067
45.8	-0.0439727	0.552975	0.0573811	62.6767
46	-0.0442747	0.550816	0.0577543	63.3495
46.2	-0.0445774	0.548666	0.0581273	64.0248
46.4	-0.0448808	0.546523	0.0585001	64.7022
46.6	-0.045185	0.544388	0.0588726	65.3815
46.8	-0.0454902	0.542264	0.0592445	66.0639
47	-0.0457962	0.540147	0.0596161	66.7484
47.2	-0.0461031	0.538039	0.0599871	67.4347
47.4	-0.0464108	0.535938	0.0603576	68.1232
47.6	-0.0467198	0.533848	0.0607271	68.8144
47.8	-0.0470298	0.531765	0.0610958	69.5074
48	-0.0473406	0.529689	0.0614637	70.2023
48.2	-0.0476527	0.527623	0.0618307	70.8993
48.4	-0.047966	0.525566	0.0621963	71.5988
48.6	-0.0482805	0.523518	0.0625608	72.3
48.8	-0.0485959	0.521477	0.0629243	73.003
49	-0.0489127	0.519446	0.0632863	73.7081
49.2	-0.0492309	0.517426	0.0636468	74.4153
49.4	-0.0495501	0.515415	0.064006	75.1243
49.6	-0.0498704	0.513412	0.0643639	75.8348
49.8	-0.0501921	0.511422	0.0647202	76.5475
50	-0.0505151	0.509444	0.0650748	77.2622
50.2	-0.0508391	0.507476	0.065428	77.9784
50.4	-0.0511641	0.505519	0.0657799	78.6962
50.6	-0.0514903	0.503576	0.06613	79.416
50.8	-0.0518177	0.501649	0.0664786	80.1377
51	-0.0521459	0.499733	0.0668259	80.8609
51.2	-0.0524749	0.497832	0.067172	81.5855
51.4	-0.0528048	0.495947	0.0675167	82.312
51.6	-0.0531355	0.494081	0.0678601	83.0403
51.8	-0.0534667	0.49223	0.0682026	83.77
52	-0.0537984	0.490396	0.0685443	84.5012
52.2	-0.0541304	0.488582	0.0688852	85.234
52.4	-0.0544626	0.486791	0.0692257	85.9686
52.6	-0.0547947	0.48502	0.0695661	86.7045
52.8	-0.0551267	0.483267	0.0699065	87.4418
53	-0.0554583	0.481538	0.0702474	88.1806
53.2	-0.0557892	0.479838	0.0705892	88.9211
53.4	-0.0561192	0.478159	0.0709323	89.663
53.6	-0.0564484	0.476503	0.0712767	90.4061
53.8	-0.0567764	0.474871	0.0716229	91.1505
54	-0.0571027	0.473272	0.0719719	91.8967
54.2	-0.0574276	0.471696	0.0723234	92.6442
54.4	-0.057751	0.470142	0.0726774	93.3928
54.6	-0.0580729	0.468612	0.0730343	94.1427
54.8	-0.0583925	0.467112	0.0733953	94.8942
55	-0.0587104	0.465634	0.0737599	95.647
55.2	-0.0590265	0.464178	0.0741281	96.4009
55.4	-0.0593409	0.462741	0.0744999	97.156
55.6	-0.0596532	0.461328	0.0748763	97.9125
55.8	-0.0599634	0.459935	0.0752575	98.6704
56	-0.0602721	0.458558	0.0756429	99.4294
56.2	-0.0605792	0.457195	0.0760324	100.189
56.4	-0.0608848	0.455845	0.0764262	100.951
56.6	-0.0611887	0.45451	0.076826	101.713
56.8	-0.0614915	0.453182	0.0772301	102.477
57	-0.0617935	0.451859	0.0776384	103.242
57.2	-0.0620949	0.450539	0.0780509	104.008
57.4	-0.0623959	0.449218	0.0784685	104.775
57.6	-0.0626972	0.447891	0.0788906	105.543
57.8	-0.0629992	0.446553	0.0793164	106.313
58	-0.0633025	0.4452	0.0797457	107.083
58.2	-0.0636076	0.443828	0.0801781	107.855
58.4	-0.0639167	0.442417	0.0806138	108.627
58.6	-0.0642304	0.440964	0.0810508	109.401
58.8	-0.0645499	0.439459	0.0814883	110.176
59	-0.0648768	0.43789	0.0819249	110.952
59.2	-0.065215	0.436228	0.0823586	111.728
59.4	-0.0655697	0.434429	0.0827861	112.506
59.6	-0.065942	0.432484	0.0832061	113.285
59.8	-0.0663357	0.430361	0.0836167	114.065
60	-0.066755	0.42802	0.0840158	114.846
60.2	-0.0672161	0.425317	0.0843962	115.627
60.4	-0.0677283	0.422158	0.0847549	116.41
60.6	-0.0683001	0.418448	0.0850897	117.194
60.8	-0.0689465	0.414028	0.0853962	117.979
61	-0.0696849	0.40871	0.0856701	118.764
61.2	-0.0705866	0.401708	0.0858934	119.551
61.4	-0.0716501	0.392927	0.0860764	120.338
61.6	-0.0728901	0.382145	0.0862218	121.127
61.8	-0.0743177	0.369221	0.086332	121.916
62	-0.0759392	0.354106	0.0864098	122.706
62.2	-0.0777583	0.337078	0.0864568	123.497
62.4	-0.0796423	0.319813	0.0864919	124.289
62.6	-0.0815536	0.302764	0.0865209	125.082
62.8	-0.0834698	0.286195	0.0865473	125.876
63	-0.0853855	0.270176	0.0865719	126.67
63.2	-0.0872923	0.254935	0.0865943	127.466
63.4	-0.089186	0.240349	0.0866151	128.262
63.6	-0.0910624	0.226464	0.0866343	129.059
63.8	-0.0929172	0.213329	0.086652	129.857
64	-0.094745	0.201003	0.0866681	130.656
64.2	-0.0965259	0.189842	0.0866822	131.455
64.4	-0.0982596	0.179659	0.086695	132.256
64.6	-0.0999368	0.170523	0.0867063	133.057
64.8	-0.101547	0.162497	0.0867163	133.859
65	-0.103081	0.155645	0.086725	134.661
65.2	-0.10449	0.150396	0.0867321	135.465
65.4	-0.105771	0.146461	0.086738	136.27
65.6	-0.106824	0.143656	0.0867424	137.075
65.8	-0.107468	0.141658	0.0867448	137.88
66	-0.107556	0.140042	0.0867451	138.687
66.2	-0.107576	0.138492	0.0867451	139.495
66.4	-0.107606	0.137006	0.0867451	140.303
66.6	-0.107638	0.135575	0.0867451	141.112
66.8	-0.107664	0.134188	0.0867451	141.921
67	-0.107623	0.132749	0.0867449	142.732
67.2	-0.107251	0.130849	0.0867441	143.543
67.4	-0.105531	0.126363	0.086741	144.355
67.6	-0.10328	0.11913	0.0867371	145.167
67.8	-0.100712	0.109861	0.0867327	145.98
68	-0.098004	0.0994801	0.086728	146.794
68.2	-0.095345	0.0889258	0.0867231	147.609
68.4	-0.0930004	0.0791103	0.0867179	148.424
68.6	-0.0910211	0.0702109	0.0867128	149.24
68.8	-0.0894169	0.0622437	0.0867078	150.057
69	-0.0881814	0.0551905	0.086703	150.875
69.2	-0.0872904	0.0489922	0.0866985	151.693
69.4	-0.0867331	0.0436298	0.0866945	152.511
69.6	-0.0864709	0.0390054	0.0866911	153.331
69.8	-0.0864256	0.0349158	0.0866882	154.151
70	-0.0865736	0.0312964	0.0866858	154.972
70.2	-0.0868942	0.0280901	0.0866839	155.793
70.4	-0.087369	0.0252465	0.0866825	156.615
70.6	-0.0880046	0.0227736	0.0866817	157.438
70.8	-0.0887638	0.0205802	0.0866814	158.261
71	-0.0896261	0.0186169	0.0866816	159.085
71.2	-0.0905811	0.0168587	0.0866823	159.91
71.4	-0.0916192	0.0152832	0.0866835	160.735
71.6	-0.0927316	0.0138709	0.0866852	161.561
71.8	-0.0939243	0.0126355	0.0866874	162.388
72	-0.0951713	0.0115222	0.0866901	163.215
72.2	-0.0964661	0.0105189	0.0866933	164.042
72.4	-0.0978026	0.00961498	0.0866969	164.871
72.6	-0.0991749	0.00880117	0.0867008	165.7
72.8	-0.100578	0.00807125	0.0867052	166.529
73	-0.10201	0.00742933	0.0867101	167.359
73.2	-0.103457	0.00685162	0.0867152	168.19
73.4	-0.104915	0.00633317	0.0867206	169.021
73.6	-0.106378	0.00586961	0.0867263	169.853
73.8	-0.107841	0.00545707	0.0867321	170.685
74	-0.109297	0.00509367	0.086738	171.518
74.2	-0.110733	0.00478355	0.086744	172.352
74.4	-0.112141	0.00451455	0.08675	173.186
74.6	-0.113512	0.0042849	0.0867557	174.02
74.8	-0.114832	0.00409301	0.0867613	174.856
75	-0.116085	0.00393738	0.0867664	175.691
75.2	-0.11725	0.00381676	0.086771	176.527
75.4	-0.118258	0.00373595	0.0867748	177.364
75.6	-0.119077	0.00368344	0.0867777	178.202
75.8	-0.119623	0.00365322	0.0867795	179.039
76	-0.119873	0.00363719	0.0867802	179.878
76.2	-0.119903	0.00362754	0.0867803	180.716
76.4	-0.1199	0.00361892	0.0867803	181.556
76.6	-0.119898	0.00361063	0.0867803	182.395
76.8	-0.119899	0.0036026	0.0867803	183.235
77	-0.119901	0.00359483	0.0867803	184.076
77.2	-0.119907	0.00358731	0.0867803	184.917
77.4	-0.119916	0.00358003	0.0867803	185.758
77.6	-0.11993	0.00357298	0.0867803	186.6
77.8	-0.119951	0.00356619	0.0867803	187.441
78	-0.119972	0.00355964	0.0867803	188.283
78.2	-0.11998	0.00355331	0.0867803	189.125
78.4	-0.119982	0.00354721	0.0867803	189.965
78.6	-0.119982	0.00354138	0.0867803	190.801
78.8	-0.119982	0.00353585	0.0867803	191.629
79	-0.119982	0.00353061	0.0867803	192.458
79.2	-0.119982	0.00352518	0.0867803	193.306
79.4	-0.119982	0.00351991	0.0867803	194.154
79.6	-0.119982	0.0035148	0.0867803	195.002
79.8	-0.119982	0.00350986	0.0867803	195.851
80	-0.119982	0.00350506	0.0867803	196.7
