# Supplementary material for: Gas transport in firn: multiple-tracer characterisation and model intercomparison for NEEM, Northern Greenland
Source: Copernicus journal article supplement (doi:10.5194/acp-12-4259-2012), 2012-05-14
Supplement: Supplementary file 7 [file NEEM08_EU_INSTAAR.xls]

## Sheet: Diffusivity
depth	Molec diff	D eddy
0	1.27688e-05	1.7e-05
1	1.26483e-05	1.53e-05
2	1.26483e-05	1.19e-05
3	1.24074e-05	9.3e-06
4	1.22869e-05	7.24e-06
5	1.22869e-05	5.64e-06
6	1.2046e-05	4.4e-06
7	1.19737e-05	3.42e-06
8	1.18533e-05	2.67e-06
9	1.1769e-05	2.08e-06
10	1.16485e-05	1.62e-06
11	1.09378e-05	1.2e-06
12	1.08053e-05	9.33e-07
13	1.06487e-05	7.26e-07
14	1.05162e-05	5.67e-07
15	1.03355e-05	4.4e-07
16	1.02271e-05	3.43e-07
17	1.00705e-05	2.68e-07
18	9.99819e-06	2.08e-07
19	9.86569e-06	1.62e-07
20	9.26339e-06	1.26e-07
21	8.34789e-06	8.93e-08
22	8.22743e-06	6.95e-08
23	8.03469e-06	5.41e-08
24	7.90219e-06	4.21e-08
25	7.79377e-06	3.29e-08
26	7.73354e-06	2.56e-08
27	7.60104e-06	1.99e-08
28	7.52876e-06	1.55e-08
29	7.81786e-06	1e-08
30	7.73354e-06	1e-08
31	7.99855e-06	1e-08
32	7.82991e-06	1e-08
33	7.64922e-06	1e-08
34	6.91441e-06	1e-08
35	6.55303e-06	1e-08
36	6.07119e-06	1e-08
37	5.67367e-06	1e-08
38	5.24002e-06	1e-08
39	4.92682e-06	1e-08
40	4.27634e-06	1e-08
41	3.97519e-06	1e-08
42	3.78245e-06	1e-08
43	3.58971e-06	1e-08
44	3.51744e-06	1e-08
45	3.27652e-06	1e-08
46	3.07173e-06	1e-08
47	3.0115e-06	1e-08
48	2.95127e-06	1e-08
49	3.18015e-06	1e-08
50	2.36102e-06	1e-08
51	2.31284e-06	1e-08
52	1.98759e-06	1e-08
53	1.56598e-06	1e-08
54	1.38529e-06	1e-08
55	1.25279e-06	1e-08
56	1.0745e-06	1e-08
57	7.19147e-07	1e-08
58	4.90273e-07	1e-08
59	3.91496e-07	1e-08
59.62	4.09565e-07	1e-08
59.88	3.97519e-07	9.9e-09
60.12	3.4813e-07	9.8e-09
60.38	3.31265e-07	9.7e-09
60.62	2.73445e-07	9.6e-09
60.88	2.31284e-07	9.5e-09
61.12	2.2767e-07	9.5e-09
61.38	2.16828e-07	9.5e-09
61.62	1.79486e-07	9.39e-09
61.88	1.52984e-07	8.2e-09
62.12	9.55249e-08	4.05e-09
62.38	4.40884e-08	4.44e-09
62.62	2.26465e-08	3.77e-09
62.88	1.22869e-08	3.22e-09
63.12	1.00825e-08	4.09e-09
63.38	5.83027e-09	4.91e-09
63.62	5.30025e-09	5.3e-09
63.88	6.43257e-09	6.43e-09
64.12	5.45685e-09	5.46e-09
64.38	4.78227e-09	4.78e-09
64.62	3.67403e-09	3.67e-09
64.88	2.77058e-09	2.77e-09
65.12	1.28892e-09	1.29e-09
65.38	7.45648e-10	7.45e-10
65.62	9.62477e-10	9.62e-10
65.88	7.66127e-10	7.66e-10
66.12	6.13142e-10	6.13e-10
66.38	6.11938e-10	6.12e-10
66.62	5.10751e-10	5.11e-10
66.88	5.70981e-10	5.7e-10
67.12	6.45666e-10	6.45e-10
67.38	5.85436e-10	5.85e-10
67.62	7.34807e-10	7.35e-10
67.88	8.39607e-10	8.4e-10
68.12	1.15039e-09	1.15e-09
68.38	8.39607e-10	8.4e-10
68.62	4.93887e-10	4.94e-10
68.88	7.95037e-10	7.95e-10
69.12	8.20334e-10	8.2e-10
69.38	9.04656e-10	9.05e-10
69.62	1.01548e-09	1.02e-09
69.88	1.2046e-09	1.21e-09
70.12	7.2517e-10	7.25e-10
70.38	6.39643e-10	6.4e-10
70.62	5.09546e-10	5.1e-10
70.88	4.81841e-10	4.82e-10
71.12	7.44444e-10	7.45e-10
71.38	6.85418e-10	6.85e-10
71.62	9.60067e-10	9.6e-10
71.88	1.24074e-09	1.24e-09
72.12	2.77058e-09	2.77e-09
72.38	2.77058e-09	2.77e-09
72.62	2.77058e-09	2.77e-09
72.88	2.77058e-09	2.77e-09
73.12	2.77058e-09	2.77e-09
73.38	2.77058e-09	2.77e-09
73.62	2.79468e-09	2.79e-09
73.88	3.39698e-09	3.4e-09
74.12	3.36084e-09	3.36e-09
74.38	3.72222e-09	3.73e-09
74.62	3.72222e-09	3.73e-09
74.88	3.72222e-09	3.73e-09
75.12	3.72222e-09	3.73e-09
75.38	3.72222e-09	3.73e-09
75.62	4.14383e-09	4.14e-09
75.88	4.14383e-09	4.14e-09
76.12	4.9991e-09	5e-09
76.38	4.9991e-09	5e-09
76.62	4.9991e-09	5e-09
76.88	4.9991e-09	5e-09
77.12	4.9991e-09	5e-09
77.38	4.9991e-09	5e-09
77.62	4.9991e-09	5e-09
77.88	4.9991e-09	5e-09
78.12	4.9991e-09	5e-09
78.38	4.9991e-09	5e-09
78.62	4.9991e-09	5e-09

## Sheet: profiles
depth	CO2	CH4	SF6	CFC_11	CFC_12	CFC_113	HFC_134a	CH3CCl3	14CO2	d15N2	CCl4
0	382.416	1837.19	6.647	245.831	536.851	78.1224	52.8177	11.3327	487.243	1	91.6705
1	382.951	1838.4	6.6372	245.917	536.922	78.1496	52.6217	11.4891	487.987	1	91.7232
2	383.493	1839.67	6.6265	246.01	536.996	78.1782	52.4129	11.6609	488.744	1	91.7796
3	384.043	1841	6.6137	246.116	537.078	78.2101	52.1766	11.8661	489.515	1.00001	91.8445
4	384.588	1842.39	6.5986	246.238	537.166	78.2454	51.9118	12.1087	490.285	1.00001	91.9186
5	385.108	1843.79	6.5811	246.373	537.259	78.2836	51.6201	12.3911	491.028	1.00001	92.0017
6	385.584	1845.17	6.5614	246.52	537.354	78.3238	51.3053	12.7131	491.718	1.00002	92.0931
7	386.009	1846.52	6.5392	246.68	537.45	78.3659	50.9663	13.0782	492.348	1.00002	92.1932
8	386.369	1847.81	6.5148	246.85	537.543	78.4088	50.6075	13.4842	492.9	1.00003	92.3008
9	386.661	1849.02	6.4883	247.029	537.631	78.452	50.2304	13.9305	493.37	1.00003	92.4153
10	386.881	1850.15	6.46	247.213	537.712	78.4946	49.8373	14.4149	493.754	1.00003	92.5359
11	387.031	1851.18	6.43	247.402	537.786	78.5363	49.4285	14.9368	494.055	1.00004	92.6621
12	387.116	1852.16	6.3968	247.605	537.852	78.5787	48.9823	15.524	494.29	1.00004	92.8003
13	387.134	1853.04	6.3622	247.81	537.907	78.6192	48.5206	16.1473	494.449	1.00005	92.9435
14	387.09	1853.81	6.3263	248.017	537.95	78.6577	48.0435	16.8054	494.541	1.00005	93.0911
15	386.991	1854.48	6.2895	248.224	537.98	78.6938	47.5534	17.4933	494.574	1.00006	93.2421
16	386.844	1855.05	6.2519	248.43	537.996	78.7273	47.0502	18.2102	494.556	1.00006	93.3961
17	386.657	1855.52	6.214	248.632	537.999	78.7578	46.5399	18.9463	494.498	1.00006	93.5509
18	386.437	1855.89	6.1758	248.831	537.989	78.7854	46.022	19.7016	494.407	1.00007	93.7065
19	386.192	1856.17	6.1379	249.024	537.966	78.8097	45.5015	20.4684	494.291	1.00007	93.8612
20	385.926	1856.37	6.0999	249.213	537.93	78.8311	44.9762	21.2495	494.156	1.00008	94.0154
21	385.63	1856.5	6.0602	249.406	537.88	78.8502	44.421	22.0824	494	1.00008	94.1764
22	385.294	1856.56	6.017	249.612	537.811	78.8676	43.8099	23.0077	493.818	1.00009	94.3512
23	384.949	1856.54	5.9739	249.812	537.729	78.8815	43.1962	23.9456	493.631	1.00009	94.5246
24	384.597	1856.47	5.9307	250.009	537.634	78.8919	42.5756	24.9034	493.44	1.0001	94.6977
25	384.244	1856.34	5.8878	250.2	537.525	78.8987	41.9536	25.8731	493.25	1.0001	94.869
26	383.894	1856.16	5.8451	250.384	537.404	78.9018	41.3334	26.8507	493.063	1.00011	95.0377
27	383.552	1855.94	5.8032	250.562	537.272	78.9012	40.7196	27.8291	492.884	1.00011	95.2026
28	383.215	1855.69	5.7615	250.733	537.129	78.8967	40.1077	28.8161	492.711	1.00012	95.3652
29	382.889	1855.41	5.7205	250.897	536.974	78.8885	39.5035	29.8029	492.547	1.00012	95.5239
30	382.589	1855.12	5.6819	251.047	536.817	78.8769	38.9349	30.7435	492.4	1.00013	95.6717
31	382.3	1854.82	5.644	251.189	536.649	78.8616	38.3749	31.6821	492.263	1.00013	95.8157
32	382.035	1854.52	5.6083	251.318	536.481	78.8433	37.8481	32.577	492.141	1.00014	95.9496
33	381.779	1854.21	5.5729	251.442	536.301	78.8211	37.3254	33.4774	492.029	1.00014	96.0811
34	381.532	1853.9	5.5377	251.559	536.11	78.7948	36.8064	34.3841	491.925	1.00015	96.2103
35	381.275	1853.55	5.5	251.68	535.891	78.7619	36.2505	35.3696	491.823	1.00015	96.3472
36	381.021	1853.19	5.4614	251.797	535.653	78.7231	35.6833	36.39	491.727	1.00016	96.4853
37	380.764	1852.81	5.4211	251.911	535.388	78.677	35.0923	37.4694	491.638	1.00016	96.6276
38	380.507	1852.41	5.3794	252.023	535.097	78.6232	34.4829	38.5997	491.555	1.00016	96.7727
39	380.246	1852.01	5.3358	252.131	534.775	78.5605	33.8479	39.7954	491.479	1.00017	96.9221
40	379.988	1851.59	5.2911	252.233	534.425	78.489	33.1992	41.0358	491.411	1.00017	97.0728
41	379.709	1851.14	5.2416	252.336	534.014	78.4017	32.4829	42.4267	491.347	1.00018	97.2371
42	379.429	1850.69	5.1903	252.431	533.566	78.3027	31.7454	43.8803	491.291	1.00018	97.404
43	379.154	1850.25	5.1387	252.514	533.089	78.1938	31.0052	45.3614	491.245	1.00019	97.5691
44	378.882	1849.81	5.0865	252.586	532.582	78.0744	30.262	46.8704	491.207	1.00019	97.7326
45	378.621	1849.41	5.0357	252.643	532.063	77.9485	29.5409	48.3557	491.177	1.0002	97.8887
46	378.358	1849.01	4.9836	252.687	531.504	77.8097	28.8072	49.8883	491.152	1.0002	98.045
47	378.092	1848.63	4.9309	252.718	530.908	77.6584	28.0678	51.4542	491.134	1.00021	98.1998
48	377.837	1848.27	4.8799	252.732	530.304	77.5016	27.3576	52.9789	491.12	1.00021	98.3457
49	377.592	1847.95	4.8307	252.731	529.694	77.3398	26.678	54.4574	491.109	1.00022	98.4826
50	377.377	1847.68	4.7878	252.715	529.135	77.1888	26.0891	55.7558	491.103	1.00022	98.5985
51	377.105	1847.36	4.7339	252.677	528.396	76.9859	25.3545	57.3965	491.096	1.00023	98.7395
52	376.844	1847.08	4.6826	252.62	527.659	76.7798	24.663	58.9619	491.091	1.00023	98.8686
53	376.561	1846.79	4.6276	252.535	526.825	76.543	23.9276	60.649	491.087	1.00024	99.0014
54	376.227	1846.47	4.5636	252.408	525.804	76.2488	23.0829	62.6124	491.083	1.00024	99.1483
55	375.879	1846.15	4.4979	252.243	524.697	75.9254	22.2268	64.6287	491.081	1.00025	99.2907
56	375.528	1845.85	4.4327	252.042	523.535	75.5811	21.3892	66.6274	491.08	1.00025	99.4229
57	375.161	1845.55	4.3655	251.792	522.263	75.1997	20.5406	68.6783	491.081	1.00025	99.5481
58	374.678	1845.16	4.2789	251.403	520.51	74.6693	19.4683	71.2984	491.088	1.00026	99.6925
59	374.07	1844.67	4.172	250.827	518.187	73.9607	18.177	74.4838	491.108	1.00026	99.846
59.62	373.676	1844.34	4.1041	250.388	516.587	73.4699	17.3792	76.466	491.131	1.00027	99.9249
59.88	373.531	1844.22	4.0791	250.219	515.986	73.2848	17.0886	77.1912	491.14	1.00027	99.952
60.12	373.39	1844.09	4.0548	250.046	515.39	73.1007	16.809	77.8896	491.151	1.00027	99.9763
60.38	373.238	1843.96	4.0289	249.853	514.737	72.8996	16.5135	78.6272	491.164	1.00027	99.9998
60.62	373.089	1843.82	4.0035	249.653	514.08	72.697	16.2267	79.3432	491.179	1.00027	100.02
60.88	372.92	1843.66	3.9751	249.418	513.326	72.465	15.91	80.1316	491.197	1.00027	100.04
61.12	372.736	1843.48	3.9443	249.148	512.483	72.2065	15.571	80.9727	491.22	1.00027	100.057
61.38	372.563	1843.31	3.9155	248.881	511.67	71.9571	15.259	81.7448	491.245	1.00027	100.07
61.62	372.396	1843.13	3.8881	248.608	510.865	71.7107	14.9662	82.4665	491.272	1.00028	100.077
61.88	372.214	1842.93	3.8585	248.293	509.962	71.4358	14.657	83.2216	491.305	1.00028	100.079
62.12	372.021	1842.7	3.8276	247.938	508.972	71.1355	14.3414	83.9855	491.346	1.00028	100.075
62.38	371.742	1842.34	3.7831	247.378	507.472	70.6795	13.9029	85.0389	491.413	1.00028	100.056
62.62	371.237	1841.64	3.7065	246.316	504.705	69.8603	13.1705	86.7318	491.554	1.00028	99.9983
62.88	370.419	1840.39	3.588	244.493	500.092	68.5242	12.0858	89.1352	491.821	1.00028	99.8617
63.12	369.183	1838.27	3.4168	241.558	492.882	66.4807	10.5998	92.2582	492.288	1.00028	99.5885
63.38	367.956	1835.94	3.2536	238.472	485.485	64.4246	9.262	94.9014	492.815	1.00028	99.2561
63.62	366.498	1832.78	3.0768	234.834	476.841	62.1276	7.8827	97.3651	493.518	1.00028	98.825
63.88	365.146	1829.59	2.916	231.253	468.5	59.9357	6.7036	99.2996	494.237	1.00028	98.3661
64.12	364.141	1827.07	2.7964	228.398	461.981	58.2278	5.8795	100.527	494.818	1.00028	97.9769
64.38	363.129	1824.34	2.677	225.345	455.129	56.4481	5.108	101.523	495.455	1.00028	97.5379
64.62	362.164	1821.53	2.5644	222.262	448.321	54.6982	4.429	102.228	496.115	1.00028	97.0731
64.88	361.158	1818.36	2.4493	218.875	440.955	52.8336	3.7874	102.67	496.867	1.00028	96.5386
65.12	360.141	1814.82	2.3363	215.262	433.216	50.9188	3.2141	102.77	497.711	1.00028	95.9418
65.38	358.609	1808.68	2.1761	209.535	421.146	48.0559	2.5103	102.202	499.17	1.00028	94.9442
65.62	356.535	1799.08	1.9713	201.156	403.853	44.1474	1.775	100.284	501.477	1.00028	93.3976
65.88	354.903	1790.81	1.8117	193.886	389.173	40.9204	1.3015	97.9892	503.516	1.00028	91.9903
66.12	353.203	1781.16	1.6538	185.869	373.217	37.5771	0.9231	94.8665	505.893	1.00028	90.3728
66.38	351.376	1769.48	1.4943	176.828	355.453	34.0645	0.6256	90.7868	508.73	1.00028	88.4716
66.62	349.631	1757.12	1.3504	167.788	337.9	30.7923	0.4202	86.293	511.682	1.00028	86.4917
66.88	347.709	1741.87	1.2048	157.607	318.281	27.4071	0.2681	80.8721	515.177	1.00028	84.1665
67.12	345.845	1725.75	1.073	147.453	298.872	24.2954	0.1689	75.2237	518.724	1.00028	81.7461
67.38	344.099	1709.46	0.958	137.769	280.466	21.5596	0.1068	69.6952	522.12	1.00028	79.3395
67.62	342.171	1690.03	0.8424	127.126	260.273	18.8214	0.0641	63.5357	525.857	1.00028	76.5777
67.88	340.401	1671.36	0.7426	117.184	241.491	16.4628	0.0386	57.743	529.206	1.00028	73.8857
68.12	338.753	1653.36	0.6546	107.812	223.845	14.3955	0.023	52.2771	532.185	1.00028	71.2495
68.38	337.535	1639.71	0.5919	100.766	210.626	12.926	0.0148	48.1725	534.25	1.00028	69.2008
68.62	336.224	1624.13	0.5305	93.4586	196.841	11.5118	0.0091	43.9601	536.214	1.00028	67.0054
68.88	334.401	1600.75	0.4559	83.9085	178.62	9.8427	0.0049	38.5647	538.312	1.00028	64.0067
69.12	332.941	1581.69	0.3991	76.1844	163.889	8.5847	0.0028	34.2601	539.478	1.00028	61.4677
69.38	331.514	1562.48	0.3477	68.7775	149.69	7.4623	0.0015	30.2086	540.04	1.00028	58.9264
69.62	330.189	1544.29	0.303	61.9839	136.611	6.4961	0.0009	26.5612	539.999	1.00028	56.4956
69.88	329.024	1528.06	0.2656	56.0484	125.144	5.6955	0.0005	23.4291	539.478	1.00028	54.2877
70.12	328.128	1515.4	0.2381	51.5219	116.371	5.1103	0.0003	21.0779	538.705	1.00028	52.5439
70.38	327.049	1499.43	0.2083	46.3982	106.306	4.4856	0.0002	18.4849	537.138	1.00028	50.4919
70.62	325.996	1483.26	0.1816	41.6303	96.8364	3.9342	0.0001	16.1348	534.851	1.00028	48.4898
70.88	324.856	1464.8	0.1561	36.8425	87.1663	3.4114	0	13.8531	531.264	1.00028	46.3561
71.12	323.595	1443.28	0.1314	31.9782	77.1468	2.9092	0	11.6244	525.761	1.00028	44.0125
71.38	322.529	1424.59	0.1125	28.1019	69.0417	2.5245	0	9.9089	519.858	1.00028	41.9764
71.62	321.27	1401.5	0.0935	24.0162	60.27	2.1371	0	8.183	511.221	1.00028	39.5823
71.88	320.066	1379.11	0.0773	20.3796	52.3006	1.8028	0	6.7098	501.622	1.00028	37.1905
72.12	318.884	1357.13	0.0626	16.9917	44.7521	1.4975	0	5.3858	491.216	1.00028	34.7144
72.38	318.228	1345.07	0.0548	15.1317	40.5793	1.3308	0	4.6743	485.089	1.00028	33.2432
72.62	317.596	1333.3	0.0479	13.4541	36.7549	1.1823	0	4.0496	478.898	1.00028	31.8127
72.88	316.987	1321.79	0.0418	11.9416	33.2481	1.0497	0	3.5016	472.666	1.00028	30.4176
73.12	316.397	1310.5	0.0364	10.5763	30.0262	0.9311	0	3.0206	466.41	1.00028	29.051
73.38	315.821	1299.37	0.0316	9.3394	27.0527	0.8244	0	2.597	460.128	1.00028	27.7032
73.62	315.255	1288.32	0.0272	8.2096	24.2846	0.7273	0	2.2212	453.806	1.00028	26.3598
73.88	314.695	1277.34	0.0233	7.1688	21.6872	0.6382	0	1.8845	447.454	1.00028	25.0102
74.12	314.23	1268.21	0.0204	6.3553	19.6238	0.5685	0	1.628	442.122	1.00028	23.866
74.38	313.774	1259.2	0.0177	5.6102	17.6991	0.5047	0	1.3991	436.852	1.00028	22.7304
74.62	313.37	1251.21	0.0155	4.9929	16.0772	0.4517	0	1.2142	432.181	1.00028	21.7137
74.88	312.981	1243.5	0.0135	4.4401	14.5975	0.4042	0	1.0527	427.696	1.00028	20.7296
75.12	312.607	1236.06	0.0118	3.944	13.2446	0.3615	0	0.9114	423.392	1.00028	19.7751
75.38	312.245	1228.86	0.0103	3.4969	12.0022	0.3228	0	0.7873	419.261	1.00028	18.8459
75.62	311.894	1221.89	0.0089	3.0905	10.8522	0.2875	0	0.6774	415.284	1.00028	17.9355
75.88	311.585	1215.79	0.0078	2.7529	9.881	0.2581	0	0.5881	411.821	1.00028	17.1242
76.12	311.289	1209.95	0.0068	2.4465	8.9851	0.2312	0	0.5088	408.532	1.00028	16.3378
76.38	311.053	1205.32	0.0061	2.2126	8.292	0.2105	0	0.4495	405.934	1.00028	15.7015
76.62	310.834	1201.05	0.0054	2.0065	7.6724	0.1922	0	0.3982	403.555	1.00029	15.1092
76.88	310.633	1197.15	0.0049	1.8259	7.1221	0.1761	0	0.3541	401.397	1.00029	14.563
77.12	310.452	1193.63	0.0044	1.669	6.6381	0.1621	0	0.3165	399.464	1.00029	14.0653
77.38	310.291	1190.51	0.004	1.5345	6.2182	0.15	0	0.2847	397.763	1.00029	13.6195
77.62	310.151	1187.83	0.0036	1.4213	5.8614	0.1397	0	0.2583	396.3	1.00029	13.2295
77.88	310.034	1185.59	0.0033	1.3289	5.5678	0.1313	0	0.237	395.088	1.00029	12.9003
78.12	309.942	1183.85	0.0031	1.2573	5.3389	0.1248	0	0.2207	394.139	1.00029	12.6382
78.38	309.877	1182.62	0.003	1.2071	5.178	0.1202	0	0.2093	393.473	1.00029	12.4508
78.62	309.842	1181.96	0.0029	1.18	5.0907	0.1177	0	0.2032	393.112	1.00029	12.3479

## Sheet: scenarios
depth	SCEN1	SCEN2	SCEN3	SCEN4
0	0	1.00004	1	0.0002
0.2	0	0.999203	1	4.87167
0.4	0	0.99841	1	9.74312
0.6	0	0.997621	1	14.6146
0.8	0	0.996834	1	19.486
1	0	0.996051	1	24.3575
1.2	-0.00026385	0.995185	1	29.1125
1.4	-0.000263855	0.994322	1	33.8675
1.6	-0.00026386	0.993463	1	38.6224
1.8	-0.000263864	0.992608	1	43.3774
2	-0.000527738	0.991757	1	48.1324
2.2	-0.000527748	0.990756	1	52.7701
2.4	-0.000527759	0.98976	1	57.4078
2.6	-0.000527769	0.988769	1	62.0456
2.8	-0.00052778	0.987781	1	66.6833
3	-0.000527791	0.986799	1	71.321
3.2	-0.000527803	0.985657	1	75.8413
3.4	-0.000791722	0.984519	1	80.3615
3.6	-0.000527827	0.983388	1	84.8818
3.8	-0.000791758	0.982262	1	89.4021
4	-0.000791776	0.981142	1	93.9224
4.2	-0.000791796	0.979866	1	98.3252
4.4	-0.00105575	0.978598	1	102.728
4.6	-0.00105578	0.977335	1	107.131
4.8	-0.00131976	0.976081	1	111.534
5	-0.00131979	0.974833	1	115.937
5.2	-0.00131983	0.973442	1	120.222
5.4	-0.00131987	0.972061	1	124.508
5.6	-0.00158388	0.970687	1	128.793
5.8	-0.00158393	0.969323	1	133.079
6	-0.00158397	0.967965	1	137.364
6.2	-0.00158402	0.966455	1	141.532
6.4	-0.00184807	0.964955	1	145.701
6.6	-0.00158411	0.963463	1	149.869
6.8	-0.00184818	0.961982	1	154.038
7	-0.00184824	0.960509	1	158.206
7.2	-0.00211234	0.958905	1	162.258
7.4	-0.00211241	0.957311	1	166.31
7.6	-0.00237653	0.955728	1	170.362
7.8	-0.00237661	0.954156	1	174.413
8	-0.00264076	0.952593	1	178.465
8.2	-0.00290493	0.950903	1	182.401
8.4	-0.00290503	0.949225	1	186.337
8.6	-0.00290512	0.947559	1	190.273
8.8	-0.00290522	0.945903	1	194.209
9	-0.00316944	0.944259	1	198.145
9.2	-0.00343368	0.9425	1	201.966
9.4	-0.00343379	0.940753	1	205.787
9.6	-0.00369806	0.939017	1	209.608
9.8	-0.00369819	0.937295	1	213.43
10	-0.00396248	0.935585	1	217.251
10.2	-0.00396263	0.933762	1	220.959
10.4	-0.00396277	0.931951	1	224.667
10.6	-0.0044913	0.930154	1	228.376
10.8	-0.00449146	0.928369	1	232.084
11	-0.00449163	0.926599	1	235.793
11.2	-0.0044918	0.92462	1	239.391
11.4	-0.00475621	0.922658	1	242.99
11.6	-0.00502064	0.920711	1	246.588
11.8	-0.0052851	0.918779	1	250.187
12	-0.0052853	0.916863	1	253.785
12.2	-0.00554979	0.914838	1	257.278
12.4	-0.00555002	0.91283	1	260.772
12.6	-0.00581454	0.910839	1	264.265
12.8	-0.00581478	0.908863	1	267.758
13	-0.00607933	0.906904	1	271.251
13.2	-0.00607959	0.90484	1	274.646
13.4	-0.00634418	0.902793	1.00001	278.041
13.6	-0.0066088	0.900763	1.00001	281.436
13.8	-0.00687343	0.898751	1.00001	284.831
14	-0.00687372	0.896755	1.00001	288.226
14.2	-0.0071384	0.894668	1.00001	291.534
14.4	-0.0071387	0.892598	1.00001	294.842
14.6	-0.00766782	0.890546	1.00001	298.149
14.8	-0.00766815	0.888512	1.00001	301.457
15	-0.0079329	0.886496	1.00001	304.765
15.2	-0.00793325	0.88439	1.00001	308.002
15.4	-0.00819804	0.882302	1.00001	311.239
15.6	-0.00846286	0.880233	1.00001	314.476
15.8	-0.0087277	0.878182	1.00001	317.713
16	-0.00872808	0.876149	1.00001	320.95
16.2	-0.00899296	0.874053	1.00001	324.128
16.4	-0.00899336	0.871976	1.00001	327.306
16.6	-0.00952279	0.869916	1.00001	330.484
16.8	-0.0095232	0.867875	1.00001	333.662
17	-0.00978817	0.865853	1.00001	336.84
17.2	-0.0100532	0.863764	1.00001	339.96
17.4	-0.0100536	0.861694	1.00001	343.079
17.6	-0.0103186	0.859642	1.00001	346.198
17.8	-0.0103191	0.85761	1.00001	349.318
18	-0.0105841	0.855595	1.00001	352.437
18.2	-0.0108492	0.853535	1.00001	355.499
18.4	-0.0108497	0.851492	1.00001	358.56
18.6	-0.0111148	0.849468	1.00001	361.622
18.8	-0.0111153	0.847462	1.00001	364.683
19	-0.0113804	0.845475	1.00001	367.744
19.2	-0.0113809	0.843431	1.00001	370.749
19.4	-0.0119108	0.841405	1.00001	373.753
19.6	-0.0119113	0.839399	1.00002	376.757
19.8	-0.0124412	0.83741	1.00002	379.761
20	-0.0124418	0.83544	1.00002	382.765
20.2	-0.0127071	0.833314	1.00002	385.712
20.4	-0.0127077	0.831209	1.00002	388.659
20.6	-0.012973	0.829123	1.00002	391.607
20.8	-0.0129736	0.827057	1.00002	394.554
21	-0.013239	0.825013	1.00002	397.501
21.2	-0.0135045	0.822716	1.00002	400.393
21.4	-0.0137699	0.820441	1.00002	403.284
21.6	-0.0140355	0.818192	1.00002	406.175
21.8	-0.014301	0.815966	1.00002	409.066
22	-0.0145666	0.813765	1.00002	411.957
22.2	-0.0148322	0.811506	1.00002	414.793
22.4	-0.0148329	0.809272	1.00002	417.628
22.6	-0.0150985	0.807059	1.00002	420.464
22.8	-0.0150993	0.804873	1.00002	423.299
23	-0.015365	0.80271	1.00002	426.135
23.2	-0.0156307	0.800472	1.00002	428.916
23.4	-0.0158964	0.798257	1.00003	431.696
23.6	-0.0161622	0.796067	1.00003	434.477
23.8	-0.016428	0.793901	1.00003	437.257
24	-0.0166938	0.79176	1.00003	440.038
24.2	-0.0166946	0.789561	1.00003	442.764
24.4	-0.0172255	0.787386	1.00003	445.49
24.6	-0.0172264	0.785235	1.00003	448.217
24.8	-0.0177573	0.783108	1.00003	450.943
25	-0.0177582	0.781006	1.00003	453.669
25.2	-0.0180242	0.778853	1.00003	456.341
25.4	-0.0182902	0.776724	1.00003	459.014
25.6	-0.0182911	0.774619	1.00003	461.686
25.8	-0.0185571	0.772539	1.00003	464.359
26	-0.0188232	0.770482	1.00003	467.031
26.2	-0.0190892	0.768389	1.00003	469.65
26.4	-0.0190902	0.76632	1.00003	472.27
26.6	-0.0196215	0.764274	1.00003	474.889
26.8	-0.0196224	0.762253	1.00004	477.508
27	-0.0198886	0.760254	1.00004	480.128
27.2	-0.0198896	0.758202	1.00004	482.694
27.4	-0.020421	0.756172	1.00004	485.261
27.6	-0.020422	0.754165	1.00004	487.828
27.8	-0.0209535	0.752182	1.00004	490.394
28	-0.0209546	0.750224	1.00004	492.961
28.2	-0.0212209	0.748227	1.00004	495.476
28.4	-0.0212219	0.746253	1.00004	497.991
28.6	-0.0217535	0.744301	1.00004	500.505
28.8	-0.0217546	0.742373	1.00004	503.02
29	-0.022021	0.740468	1.00004	505.535
29.2	-0.0222874	0.738615	1.00004	507.998
29.4	-0.0225537	0.736782	1.00004	510.462
29.6	-0.0225548	0.734969	1.00004	512.925
29.8	-0.0228212	0.733177	1.00005	515.389
30	-0.0230877	0.731405	1.00005	517.852
30.2	-0.0233541	0.729595	1.00005	520.265
30.4	-0.0236206	0.727807	1.00005	522.677
30.6	-0.0236217	0.726037	1.00005	525.09
30.8	-0.0238882	0.724288	1.00005	527.503
31	-0.0241547	0.722558	1.00005	529.915
31.2	-0.0241558	0.720868	1.00005	532.278
31.4	-0.0244223	0.719195	1.00005	534.64
31.6	-0.0246888	0.71754	1.00005	537.003
31.8	-0.0249554	0.715903	1.00005	539.365
32	-0.0249565	0.714283	1.00005	541.728
32.2	-0.0252231	0.71261	1.00005	544.041
32.4	-0.0254897	0.710955	1.00005	546.354
32.6	-0.0254908	0.709317	1.00006	548.667
32.8	-0.0257575	0.707697	1.00006	550.98
33	-0.0260241	0.706094	1.00006	553.293
33.2	-0.0262908	0.704435	1.00006	555.557
33.4	-0.026292	0.702792	1.00006	557.821
33.6	-0.0265587	0.701167	1.00006	560.085
33.8	-0.0265599	0.699559	1.00006	562.349
34	-0.0268266	0.697969	1.00006	564.613
34.2	-0.0270935	0.696189	1.00006	566.829
34.4	-0.0270948	0.69443	1.00006	569.044
34.6	-0.0276274	0.69269	1.00006	571.26
34.8	-0.0276287	0.690971	1.00006	573.476
35	-0.0278956	0.689271	1.00006	575.692
35.2	-0.027897	0.687458	1.00006	577.86
35.4	-0.0284297	0.685667	1.00007	580.028
35.6	-0.0284311	0.683895	1.00007	582.196
35.8	-0.0289639	0.682145	1.00007	584.364
36	-0.0289653	0.680416	1.00007	586.532
36.2	-0.0292325	0.67853	1.00007	588.653
36.4	-0.029234	0.676666	1.00007	590.774
36.6	-0.029767	0.674826	1.00007	592.895
36.8	-0.0297686	0.673007	1.00007	595.016
37	-0.0300359	0.671212	1.00007	597.137
37.2	-0.0303033	0.669272	1.00007	599.211
37.4	-0.0305707	0.667356	1.00007	601.286
37.6	-0.0305723	0.665464	1.00007	603.36
37.8	-0.0308398	0.663597	1.00007	605.435
38	-0.0311073	0.661755	1.00007	607.51
38.2	-0.0313749	0.659741	1.00007	609.538
38.4	-0.0313766	0.657754	1.00007	611.567
38.6	-0.0319102	0.655793	1.00008	613.596
38.8	-0.031912	0.65386	1.00008	615.624
39	-0.0321797	0.651953	1.00008	617.653
39.2	-0.0324475	0.649907	1.00008	619.636
39.4	-0.0327153	0.647889	1.00008	621.62
39.6	-0.0329832	0.645899	1.00008	623.603
39.8	-0.0332511	0.643938	1.00008	625.587
40	-0.033519	0.642006	1.00008	627.57
40.2	-0.0337872	0.639761	1.00008	629.509
40.4	-0.0343214	0.637552	1.00008	631.448
40.6	-0.0343236	0.635378	1.00008	633.387
40.8	-0.034858	0.633239	1.00008	635.326
41	-0.0351263	0.631136	1.00008	637.264
41.2	-0.0353948	0.628858	1.00008	639.159
41.4	-0.0353971	0.626617	1.00008	641.054
41.6	-0.0359318	0.624415	1.00008	642.949
41.8	-0.0359342	0.622251	1.00009	644.844
42	-0.0362027	0.620126	1.00009	646.739
42.2	-0.0364714	0.617878	1.00009	648.59
42.4	-0.0367401	0.61567	1.00009	650.442
42.6	-0.0370088	0.6135	1.00009	652.293
42.8	-0.0372775	0.61137	1.00009	654.145
43	-0.0375463	0.60928	1.00009	655.996
43.2	-0.0380815	0.607066	1.00009	657.805
43.4	-0.0380841	0.604891	1.00009	659.614
43.6	-0.0386193	0.602757	1.00009	661.423
43.8	-0.038622	0.600663	1.00009	663.232
44	-0.0391573	0.598611	1.00009	665.04
44.2	-0.0394263	0.596505	1.00009	666.807
44.4	-0.0396954	0.594438	1.00009	668.574
44.6	-0.0399645	0.592409	1.00009	670.34
44.8	-0.0402336	0.59042	1.00009	672.107
45	-0.0405027	0.58847	1.00009	673.874
45.2	-0.0410385	0.586367	1.00009	675.599
45.4	-0.0410413	0.584304	1.0001	677.324
45.6	-0.0415771	0.582282	1.0001	679.05
45.8	-0.04158	0.580303	1.0001	680.775
46	-0.042116	0.578365	1.0001	682.5
46.2	-0.0423855	0.576289	1.0001	684.185
46.4	-0.0426551	0.574256	1.0001	685.869
46.6	-0.0429246	0.572265	1.0001	687.554
46.8	-0.0431943	0.570318	1.0001	689.238
47	-0.043464	0.568414	1.0001	690.923
47.2	-0.0437336	0.566465	1.0001	692.567
47.4	-0.0440032	0.564555	1.0001	694.211
47.6	-0.0442729	0.562686	1.0001	695.856
47.8	-0.0445427	0.560858	1.0001	697.5
48	-0.0448124	0.55907	1.0001	699.144
48.2	-0.0450821	0.557238	1.0001	700.749
48.4	-0.0453519	0.555443	1.0001	702.354
48.6	-0.0456217	0.553687	1.0001	703.959
48.8	-0.0458915	0.551968	1.0001	705.563
49	-0.0461613	0.550288	1.00011	707.168
49.2	-0.0464308	0.548719	1.00011	708.734
49.4	-0.0467004	0.547177	1.00011	710.3
49.6	-0.0469699	0.545666	1.00011	711.866
49.8	-0.0472396	0.544182	1.00011	713.432
50	-0.0475092	0.542728	1.00011	714.998
50.2	-0.0477796	0.540762	1.00011	716.526
50.4	-0.048317	0.53884	1.00011	718.053
50.6	-0.0483205	0.536964	1.00011	719.581
50.8	-0.048858	0.535133	1.00011	721.109
51	-0.0491286	0.53335	1.00011	722.636
51.2	-0.0493991	0.531522	1.00011	724.127
51.4	-0.0496696	0.529736	1.00011	725.617
51.6	-0.0499401	0.527991	1.00011	727.107
51.8	-0.0502106	0.526287	1.00011	728.597
52	-0.0504813	0.524625	1.00011	730.087
52.2	-0.0510193	0.522686	1.00011	731.541
52.4	-0.0510232	0.520794	1.00012	732.994
52.6	-0.0515613	0.51895	1.00012	734.447
52.8	-0.0515653	0.517153	1.00012	735.901
53	-0.0521036	0.515405	1.00012	737.354
53.2	-0.0523754	0.513187	1.00012	738.771
53.4	-0.0526473	0.511033	1.00012	740.188
53.6	-0.0534538	0.508943	1.00012	741.606
53.8	-0.0537258	0.506918	1.00012	743.023
54	-0.0539979	0.504959	1.00012	744.44
54.2	-0.0545375	0.502751	1.00012	745.822
54.4	-0.0548099	0.500611	1.00012	747.203
54.6	-0.0550823	0.498537	1.00012	748.585
54.8	-0.0553548	0.496533	1.00012	749.966
55	-0.0558947	0.494598	1.00012	751.348
55.2	-0.0561673	0.492466	1.00012	752.695
55.4	-0.05644	0.4904	1.00012	754.042
55.6	-0.0569802	0.488401	1.00012	755.389
55.8	-0.057253	0.48647	1.00012	756.735
56	-0.0575258	0.484606	1.00012	758.082
56.2	-0.057799	0.482443	1.00012	759.395
56.4	-0.0583397	0.480349	1.00012	760.708
56.6	-0.058613	0.478326	1.00012	762.02
56.8	-0.0591539	0.476374	1.00013	763.333
57	-0.0594273	0.474494	1.00013	764.646
57.2	-0.0599702	0.471718	1.00013	765.925
57.4	-0.0605132	0.469055	1.00013	767.204
57.6	-0.0607886	0.46651	1.00013	768.484
57.8	-0.0613319	0.464082	1.00013	769.763
58	-0.0618754	0.461776	1.00013	771.042
58.2	-0.0624209	0.45847	1.00013	772.289
58.4	-0.0632346	0.455338	1.00013	773.535
58.6	-0.0635126	0.452385	1.00013	774.782
58.8	-0.0643267	0.449614	1.00013	776.028
59	-0.064873	0.447027	1.00013	777.275
59.2	-0.0656881	0.443876	1.00013	777.77
59.4	-0.0662353	0.440909	1.00013	778.266
59.6	-0.0670509	0.438128	1.00013	778.761
59.8	-0.067329	0.435678	1.00013	779.867
60	-0.068144	0.433216	1.00013	781.094
60.2	-0.0686911	0.430729	1.00013	782.316
60.4	-0.0689701	0.428267	1.00013	783.484
60.6	-0.0695182	0.425644	1.00013	784.732
60.8	-0.0700669	0.422904	1.00013	785.886
61	-0.0708858	0.419863	1.00013	787.083
61.2	-0.0717051	0.416808	1.00013	788.274
61.4	-0.0722551	0.413985	1.00013	789.413
61.6	-0.0728059	0.410966	1.00013	790.629
61.8	-0.073357	0.407799	1.00013	791.755
62	-0.0741784	0.404238	1.00013	792.922
62.2	-0.0747344	0.39976	1.00013	794.083
62.4	-0.0755652	0.393764	1.00013	795.193
62.6	-0.0774925	0.382562	1.00013	796.379
62.8	-0.0794433	0.365644	1.00013	797.477
63	-0.0819672	0.341554	1.00013	798.615
63.2	-0.0850533	0.315453	1.00013	799.748
63.4	-0.0876052	0.291233	1.00013	800.83
63.6	-0.0896559	0.262276	1.00013	801.987
63.8	-0.0914226	0.23922	1.00013	803.057
64	-0.0926333	0.221924	1.00013	804.167
64.2	-0.0943775	0.207995	1.00013	805.271
64.4	-0.0953052	0.196077	1.00013	806.327
64.6	-0.0967846	0.184651	1.00013	807.455
64.8	-0.0974458	0.174225	1.00013	808.499
65	-0.0983892	0.164251	1.00013	809.582
65.2	-0.0996357	0.152165	1.00013	810.659
65.4	-0.10038	0.138124	1.00013	811.689
65.6	-0.100662	0.118271	1.00013	812.789
65.8	-0.101154	0.105511	1.00013	813.808
66	-0.101382	0.0939632	1.00013	814.864
66.2	-0.101902	0.0833817	1.00013	815.915
66.4	-0.102148	0.074398	1.00013	816.92
66.6	-0.102406	0.0655838	1.00013	817.994
66.8	-0.102113	0.0568232	1.00013	818.988
67	-0.10183	0.049424	1.00013	820.018
67.2	-0.101258	0.0434149	1.00013	821.044
67.4	-0.101229	0.038512	1.00013	822.024
67.6	-0.100683	0.0327597	1.00013	823.072
67.8	-0.100662	0.0282093	1.00013	824.043
68	-0.101208	0.024472	1.00013	825.049
68.2	-0.101441	0.0218868	1.00013	826.05
68.4	-0.102199	0.0201718	1.00013	827.007
68.6	-0.102421	0.0182016	1.00013	828.03
68.8	-0.101566	0.0154702	1.00013	828.978
69	-0.101267	0.0134372	1.00013	829.96
69.2	-0.101234	0.0117853	1.00013	830.938
69.4	-0.101479	0.010402	1.00013	831.873
69.6	-0.101732	0.00906182	1.00013	832.872
69.8	-0.102238	0.00806091	1.00013	833.797
70	-0.103012	0.00736705	1.00013	834.757
70.2	-0.103788	0.00673209	1.00013	835.712
70.4	-0.104003	0.00614409	1.00013	836.625
70.6	-0.103945	0.00553204	1.00013	837.602
70.8	-0.10302	0.00490519	1.00013	838.506
71	-0.101839	0.00427626	1.00013	839.443
71.2	-0.100362	0.00376101	1.00013	840.376
71.4	-0.0985612	0.00335278	1.00013	841.269
71.6	-0.0965382	0.0028244	1.00013	842.223
71.8	-0.0944836	0.00237408	1.00013	843.106
72	-0.0936279	0.00196409	1.00013	844.023
72.2	-0.093015	0.00168387	1.00013	844.935
72.4	-0.093801	0.00152794	1.00013	845.807
72.6	-0.094003	0.00137207	1.00013	846.74
72.8	-0.0944927	0.00123888	1.00013	847.603
73	-0.094691	0.00111597	1.00013	848.498
73.2	-0.0951934	0.00100527	1.00013	849.39
73.4	-0.0956913	0.00090843	1.00013	850.243
73.6	-0.0959056	0.000809164	1.00013	851.154
73.8	-0.0967177	0.000722698	1.00013	851.998
74	-0.0975226	0.000650111	1.00013	852.872
74.2	-0.0986245	0.000589135	1.00013	853.743
74.4	-0.0994163	0.000536889	1.00013	854.576
74.6	-0.100208	0.000488774	1.00013	855.466
74.8	-0.101294	0.000446723	1.00013	856.289
75	-0.102389	0.000407521	1.00013	857.143
75.2	-0.103486	0.000372175	1.00013	857.993
75.4	-0.104578	0.000341317	1.00013	858.804
75.6	-0.105993	0.000308707	1.00013	859.671
75.8	-0.107074	0.00028445	1.00013	860.473
76	-0.10878	0.000260618	1.00013	861.303
76.2	-0.110167	0.000242167	1.00013	862.127
76.4	-0.111222	0.000228758	1.00013	862.914
76.6	-0.112903	0.000216668	1.00013	863.753
76.8	-0.113948	0.000205762	1.00013	864.526
77	-0.114993	0.000196901	1.00013	865.324
77.2	-0.116343	0.000189995	1.00013	866.113
77.4	-0.117371	0.000185607	1.00013	866.862
77.6	-0.118709	0.000180361	1.00013	867.652
77.8	-0.119717	0.000178045	1.00013	868.369
78	-0.120407	0.00017674	1.00013	869.091
78.2	-0.121084	0.000175923	1.00013	869.776
78.4	-0.121748	0.000175231	1.00013	870.377
78.6	-0.122084	0.000175046	1.00013	870.858
