# Supplementary material for: Gas transport in firn: multiple-tracer characterisation and model intercomparison for NEEM, Northern Greenland
Source: Copernicus journal article supplement (doi:10.5194/acp-12-4259-2012), 2012-05-14
Supplement: Supplementary file 8 [file NEEM08_EU_LGGE-GIPSA.xls]

## Sheet: Diffusivity
depth	Molec diff	D eddy
0	1.07563e-05	1.52233e-05
0.2	1.07563e-05	1.50976e-05
0.4	1.07563e-05	1.49717e-05
0.6	1.07563e-05	1.48537e-05
0.8	1.07563e-05	1.47365e-05
1	1.07563e-05	1.46082e-05
1.2	1.07563e-05	1.44796e-05
1.4	1.07563e-05	1.43485e-05
1.6	1.07563e-05	1.42174e-05
1.8	1.07563e-05	1.40879e-05
2	1.07563e-05	1.39583e-05
2.2	1.07563e-05	1.38284e-05
2.4	1.07563e-05	1.3697e-05
2.6	1.07563e-05	1.35599e-05
2.8	1.07563e-05	1.34198e-05
3	1.07563e-05	1.32748e-05
3.2	1.07563e-05	1.31241e-05
3.4	1.07563e-05	1.2973e-05
3.6	1.07563e-05	1.28217e-05
3.8	1.07563e-05	1.26688e-05
4	1.07563e-05	1.25207e-05
4.2	1.07563e-05	1.23686e-05
4.4	1.07563e-05	1.22179e-05
4.6	1.07563e-05	1.20485e-05
4.8	1.07563e-05	1.18795e-05
5	1.07563e-05	1.17113e-05
5.2	1.07563e-05	1.1538e-05
5.4	1.07563e-05	1.13581e-05
5.6	1.07563e-05	1.11757e-05
5.8	1.07563e-05	1.09904e-05
6	1.07563e-05	1.08005e-05
6.2	1.07563e-05	1.06056e-05
6.4	1.07563e-05	1.04154e-05
6.6	1.07563e-05	1.02289e-05
6.8	1.07563e-05	1.00355e-05
7	1.07563e-05	9.83644e-06
7.2	1.07563e-05	9.62957e-06
7.4	1.07563e-05	9.41677e-06
7.6	1.07563e-05	9.18974e-06
7.8	1.07563e-05	8.95301e-06
8	1.07563e-05	8.72438e-06
8.2	1.07563e-05	8.50147e-06
8.4	1.07563e-05	8.27296e-06
8.6	1.07563e-05	8.04203e-06
8.8	1.07563e-05	7.81129e-06
9	1.07563e-05	7.58179e-06
9.2	1.07563e-05	7.35149e-06
9.4	1.07563e-05	7.12019e-06
9.6	1.07563e-05	6.87769e-06
9.8	1.07563e-05	6.63039e-06
10	1.07563e-05	6.38365e-06
10.2	1.07563e-05	6.1371e-06
10.4	1.07563e-05	5.89058e-06
10.6	1.07563e-05	5.6443e-06
10.8	1.07563e-05	5.38111e-06
11	1.07563e-05	5.11317e-06
11.2	1.07563e-05	4.87081e-06
11.4	1.07563e-05	4.63391e-06
11.6	1.07563e-05	4.38319e-06
11.8	1.07563e-05	4.13017e-06
12	1.07563e-05	3.88668e-06
12.2	1.07563e-05	3.6443e-06
12.4	1.07563e-05	3.39845e-06
12.6	1.07563e-05	3.15296e-06
12.8	1.07563e-05	2.91054e-06
13	1.07563e-05	2.6681e-06
13.2	1.07563e-05	2.42397e-06
13.4	1.07563e-05	2.17928e-06
13.6	1.07563e-05	1.94336e-06
13.8	1.07563e-05	1.70694e-06
14	1.07563e-05	1.47535e-06
14.2	1.07563e-05	1.2455e-06
14.4	1.07563e-05	1.04649e-06
14.6	1.07563e-05	8.4884e-07
14.8	1.07563e-05	6.52643e-07
15	1.07563e-05	4.60634e-07
15.2	1.07563e-05	2.9532e-07
15.4	1.07563e-05	1.3312e-07
15.6	1.07382e-05	0
15.8	1.05993e-05	0
16	1.04812e-05	0
16.2	1.03665e-05	0
16.4	1.0266e-05	0
16.6	1.01663e-05	0
16.8	1.00727e-05	0
17	9.97957e-06	0
17.2	9.893e-06	0
17.4	9.81248e-06	0
17.6	9.74578e-06	0
17.8	9.67959e-06	0
18	9.61619e-06	0
18.2	9.55466e-06	0
18.4	9.4998e-06	0
18.6	9.44544e-06	0
18.8	9.38818e-06	0
19	9.33219e-06	0
19.2	9.27598e-06	0
19.4	9.2191e-06	0
19.6	9.1617e-06	0
19.8	9.10456e-06	0
20	9.0472e-06	0
20.2	8.99048e-06	0
20.4	8.9344e-06	0
20.6	8.87488e-06	0
20.8	8.81507e-06	0
21	8.75523e-06	0
21.2	8.69456e-06	0
21.4	8.63576e-06	0
21.6	8.58117e-06	0
21.8	8.52774e-06	0
22	8.47286e-06	0
22.2	8.4208e-06	0
22.4	8.37309e-06	0
22.6	8.32262e-06	0
22.8	8.27225e-06	0
23	8.22246e-06	0
23.2	8.1752e-06	0
23.4	8.12514e-06	0
23.6	8.07433e-06	0
23.8	8.02725e-06	0
24	7.98289e-06	0
24.2	7.93444e-06	0
24.4	7.891e-06	0
24.6	7.86417e-06	0
24.8	7.817e-06	0
25	7.77454e-06	0
25.2	7.73229e-06	0
25.4	7.69431e-06	0
25.6	7.65396e-06	0
25.8	7.61237e-06	0
26	7.57274e-06	0
26.2	7.5318e-06	0
26.4	7.48952e-06	0
26.6	7.45261e-06	0
26.8	7.41275e-06	0
27	7.37624e-06	0
27.2	7.33897e-06	0
27.4	7.30182e-06	0
27.6	7.26469e-06	0
27.8	7.2293e-06	0
28	7.19529e-06	0
28.2	7.15385e-06	0
28.4	7.11951e-06	0
28.6	7.08791e-06	0
28.8	7.05396e-06	0
29	7.01583e-06	0
29.2	6.98049e-06	0
29.4	6.94301e-06	0
29.6	6.90953e-06	0
29.8	6.87687e-06	0
30	6.84062e-06	0
30.2	6.80112e-06	0
30.4	6.76295e-06	0
30.6	6.74151e-06	0
30.8	6.70618e-06	0
31	6.66973e-06	0
31.2	6.63076e-06	0
31.4	6.59496e-06	0
31.6	6.55236e-06	0
31.8	6.5119e-06	0
32	6.47464e-06	0
32.2	6.43404e-06	0
32.4	6.39733e-06	0
32.6	6.35812e-06	0
32.8	6.32011e-06	0
33	6.27475e-06	0
33.2	6.23375e-06	0
33.4	6.1926e-06	0
33.6	6.1492e-06	0
33.8	6.113e-06	0
34	6.07231e-06	0
34.2	6.03394e-06	0
34.4	5.99312e-06	0
34.6	5.94691e-06	0
34.8	5.90104e-06	0
35	5.85954e-06	0
35.2	5.81585e-06	0
35.4	5.76866e-06	0
35.6	5.72473e-06	0
35.8	5.68079e-06	0
36	5.63255e-06	0
36.2	5.58989e-06	0
36.4	5.54059e-06	0
36.6	5.49643e-06	0
36.8	5.45137e-06	0
37	5.40883e-06	0
37.2	5.36595e-06	0
37.4	5.32999e-06	0
37.6	5.2914e-06	0
37.8	5.246e-06	0
38	5.19755e-06	0
38.2	5.15762e-06	0
38.4	5.12344e-06	0
38.6	5.0793e-06	0
38.8	5.03871e-06	0
39	4.99952e-06	0
39.2	4.9574e-06	0
39.4	4.91476e-06	0
39.6	4.8788e-06	0
39.8	4.84112e-06	0
40	4.8105e-06	0
40.2	4.7775e-06	0
40.4	4.74762e-06	0
40.6	4.70721e-06	0
40.8	4.67331e-06	0
41	4.64113e-06	0
41.2	4.60949e-06	0
41.4	4.57301e-06	0
41.6	4.53706e-06	0
41.8	4.49741e-06	0
42	4.46573e-06	0
42.2	4.43049e-06	0
42.4	4.39067e-06	0
42.6	4.3528e-06	0
42.8	4.32007e-06	0
43	4.29322e-06	0
43.2	4.26077e-06	0
43.4	4.22284e-06	0
43.6	4.18631e-06	0
43.8	4.14383e-06	0
44	4.11297e-06	0
44.2	4.07919e-06	0
44.4	4.04374e-06	0
44.6	4.00734e-06	0
44.8	3.97291e-06	0
45	3.93826e-06	0
45.2	3.90572e-06	0
45.4	3.87351e-06	0
45.6	3.84217e-06	0
45.8	3.80004e-06	0
46	3.7589e-06	0
46.2	3.7191e-06	0
46.4	3.67621e-06	0
46.6	3.63421e-06	0
46.8	3.59631e-06	0
47	3.55062e-06	0
47.2	3.51133e-06	0
47.4	3.46817e-06	0
47.6	3.42967e-06	0
47.8	3.38378e-06	0
48	3.33418e-06	0
48.2	3.29282e-06	0
48.4	3.261e-06	0
48.6	3.22453e-06	0
48.8	3.18116e-06	0
49	3.1426e-06	0
49.2	3.09756e-06	0
49.4	3.0487e-06	0
49.6	3.00114e-06	0
49.8	2.95206e-06	0
50	2.90552e-06	0
50.2	2.85561e-06	0
50.4	2.81294e-06	0
50.6	2.76393e-06	0
50.8	2.71162e-06	0
51	2.66325e-06	0
51.2	2.60824e-06	0
51.4	2.55145e-06	0
51.6	2.49595e-06	0
51.8	2.48594e-06	0
52	2.43266e-06	0
52.2	2.37111e-06	0
52.4	2.30737e-06	0
52.6	2.24347e-06	0
52.8	2.18679e-06	0
53	2.12296e-06	0
53.2	2.05821e-06	0
53.4	1.99919e-06	0
53.6	1.93695e-06	0
53.8	1.87603e-06	0
54	1.81148e-06	0
54.2	1.74654e-06	0
54.4	1.68544e-06	0
54.6	1.61989e-06	0
54.8	1.5553e-06	0
55	1.49377e-06	0
55.2	1.4286e-06	0
55.4	1.36904e-06	0
55.6	1.30391e-06	0
55.8	1.25013e-06	0
56	1.19408e-06	0
56.2	1.14278e-06	0
56.4	1.093e-06	0
56.6	1.05287e-06	0
56.8	1.00792e-06	0
57	9.68568e-07	0
57.2	9.31312e-07	0
57.4	8.95864e-07	0
57.6	8.61236e-07	0
57.8	8.294e-07	0
58	7.93299e-07	0
58.2	7.61073e-07	0
58.4	7.2483e-07	0
58.6	6.81613e-07	0
58.8	6.43402e-07	0
59	6.05816e-07	0
59.2	5.66595e-07	0
59.4	5.279e-07	0
59.6	4.90255e-07	0
59.8	4.51137e-07	0
60	4.12747e-07	0
60.2	3.74998e-07	0
60.4	3.39962e-07	0
60.6	3.04806e-07	0
60.8	2.71647e-07	0
61	2.40384e-07	0
61.2	2.08984e-07	0
61.4	1.79185e-07	0
61.6	1.51832e-07	0
61.8	1.26373e-07	0
62	1.03739e-07	0
62.2	8.43031e-08	0
62.4	6.69411e-08	0
62.6	5.22295e-08	0
62.8	4.06964e-08	0
63	3.17743e-08	0
63.2	2.52312e-08	0
63.4	2.10222e-08	0
63.6	1.84287e-08	0
63.8	1.66008e-08	0
64	1.53718e-08	0
64.2	1.39734e-08	0
64.4	1.27005e-08	0
64.6	1.18142e-08	0
64.8	1.13693e-08	0
65	1.06151e-08	0
65.2	9.4077e-09	0
65.4	7.57512e-09	0
65.6	5.3118e-09	0
65.8	5.0164e-09	0
66	3.73e-09	0
66.2	3.38243e-09	0
66.4	3.35415e-09	0
66.6	3.33705e-09	0
66.8	3.33336e-09	0
67	3.33117e-09	0
67.2	3.3308e-09	0
67.4	3.3306e-09	0
67.6	3.3306e-09	0
67.8	3.33059e-09	0
68	3.33059e-09	0
68.2	3.33059e-09	0
68.4	3.33045e-09	0
68.6	3.32812e-09	0
68.8	3.29663e-09	0
69	3.19387e-09	0
69.2	3.07372e-09	0
69.4	2.79778e-09	0
69.6	2.58015e-09	0
69.8	2.3188e-09	0
70	2.11755e-09	0
70.2	2.02097e-09	0
70.4	1.99941e-09	0
70.6	1.95822e-09	0
70.8	1.93228e-09	0
71	1.92454e-09	0
71.2	1.92103e-09	0
71.4	1.91385e-09	0
71.6	1.86037e-09	0
71.8	1.77105e-09	0
72	1.66814e-09	0
72.2	1.59201e-09	0
72.4	1.58408e-09	0
72.6	1.58114e-09	0
72.8	1.58039e-09	0
73	1.57954e-09	0
73.2	1.57858e-09	0
73.4	1.57744e-09	0
73.6	1.5762e-09	0
73.8	1.57475e-09	0
74	1.57315e-09	0
74.2	1.57188e-09	0
74.4	1.56931e-09	0
74.6	1.56272e-09	0
74.8	1.55221e-09	0
75	1.5466e-09	0
75.2	1.52978e-09	0
75.4	1.49185e-09	0
75.6	1.45566e-09	0
75.8	1.40284e-09	0
76	1.35184e-09	0
76.2	1.33693e-09	0
76.4	1.32862e-09	0
76.6	1.28195e-09	0
76.8	1.27768e-09	0
77	1.27256e-09	0
77.2	1.22846e-09	0
77.4	1.22824e-09	0
77.6	1.22824e-09	0
77.8	7.9623e-10	0
78	2.27927e-10	0
78.2	2.0687e-10	0
78.4	1.59207e-10	0
78.6	1.20011e-10	0

## Sheet: profiles
depth	CO2	CH4	SF6	CFC_11	CFC_12	CFC_113	HFC_134a	CH3CCl3	14CO2	d15N2	CCl4
0	382.39	1837.16	6.647	245.83	536.85	78.122	52.82	11.332	487.221	1	91.67
0.2	382.524	1837.46	6.64454	245.851	536.867	78.1287	52.7714	11.3713	487.407	1	91.6831
0.4	382.655	1837.77	6.64206	245.873	536.884	78.1354	52.7228	11.4108	487.59	1	91.6963
0.6	382.784	1838.06	6.63957	245.894	536.901	78.142	52.6744	11.4505	487.77	1	91.7094
0.8	382.911	1838.36	6.63706	245.916	536.917	78.1486	52.6261	11.4905	487.947	1	91.7225
1	383.036	1838.65	6.63453	245.937	536.934	78.1551	52.5778	11.5307	488.121	1	91.7356
1.2	383.158	1838.94	6.63199	245.959	536.95	78.1616	52.5297	11.5711	488.292	1	91.7487
1.4	383.279	1839.23	6.62942	245.98	536.967	78.1681	52.4816	11.6119	488.46	1	91.7618
1.6	383.397	1839.52	6.62684	246.001	536.983	78.1745	52.4335	11.6528	488.626	1	91.7749
1.8	383.513	1839.8	6.62424	246.023	536.999	78.1809	52.3856	11.6941	488.788	1	91.788
2	383.626	1840.08	6.62162	246.044	537.015	78.1873	52.3376	11.7356	488.947	1	91.8011
2.2	383.738	1840.36	6.61899	246.066	537.031	78.1936	52.2898	11.7775	489.104	1	91.8141
2.4	383.847	1840.63	6.61633	246.087	537.046	78.1999	52.242	11.8196	489.258	1	91.8272
2.6	383.955	1840.9	6.61366	246.109	537.062	78.2061	52.1941	11.862	489.409	1	91.8404
2.8	384.06	1841.17	6.61096	246.13	537.077	78.2124	52.1464	11.9047	489.557	1	91.8535
3	384.163	1841.44	6.60824	246.152	537.092	78.2185	52.0985	11.9478	489.702	1	91.8666
3.2	384.264	1841.7	6.6055	246.173	537.107	78.2247	52.0507	11.9912	489.845	1	91.8798
3.4	384.363	1841.96	6.60274	246.195	537.122	78.2308	52.0029	12.035	489.985	1	91.893
3.6	384.459	1842.22	6.59995	246.216	537.137	78.2369	51.955	12.0792	490.122	1	91.9062
3.8	384.554	1842.48	6.59714	246.238	537.152	78.243	51.907	12.1237	490.257	1	91.9194
4	384.647	1842.73	6.59431	246.26	537.167	78.249	51.859	12.1687	490.389	1	91.9327
4.2	384.738	1842.99	6.59145	246.281	537.181	78.255	51.8109	12.214	490.518	1	91.946
4.4	384.826	1843.23	6.58857	246.303	537.196	78.261	51.7628	12.2598	490.645	1	91.9593
4.6	384.913	1843.48	6.58566	246.325	537.21	78.267	51.7146	12.306	490.769	1	91.9727
4.8	384.998	1843.72	6.58272	246.347	537.224	78.2729	51.6662	12.3526	490.891	1.00001	91.9861
5	385.08	1843.97	6.57976	246.369	537.238	78.2788	51.6177	12.3998	491.01	1.00001	91.9996
5.2	385.161	1844.21	6.57676	246.391	537.252	78.2847	51.569	12.4474	491.127	1.00001	92.0132
5.4	385.24	1844.44	6.57373	246.413	537.265	78.2905	51.5202	12.4956	491.241	1.00001	92.0268
5.6	385.317	1844.68	6.57068	246.435	537.279	78.2964	51.4711	12.5444	491.353	1.00001	92.0404
5.8	385.392	1844.91	6.56759	246.457	537.292	78.3022	51.4218	12.5937	491.462	1.00001	92.0542
6	385.465	1845.14	6.56446	246.48	537.306	78.308	51.3723	12.6436	491.569	1.00001	92.068
6.2	385.536	1845.37	6.5613	246.502	537.319	78.3138	51.3225	12.6942	491.674	1.00001	92.082
6.4	385.605	1845.59	6.5581	246.525	537.332	78.3195	51.2725	12.7454	491.777	1.00001	92.096
6.6	385.673	1845.82	6.55487	246.547	537.345	78.3253	51.2222	12.7972	491.877	1.00001	92.1101
6.8	385.738	1846.04	6.55159	246.57	537.358	78.331	51.1716	12.8498	491.975	1.00001	92.1243
7	385.802	1846.26	6.54828	246.593	537.37	78.3368	51.1206	12.903	492.071	1.00002	92.1386
7.2	385.864	1846.47	6.54493	246.616	537.383	78.3425	51.0693	12.957	492.164	1.00002	92.153
7.4	385.924	1846.69	6.54153	246.639	537.395	78.3482	51.0176	13.0119	492.256	1.00002	92.1676
7.6	385.982	1846.9	6.53808	246.663	537.407	78.3539	50.9654	13.0676	492.345	1.00002	92.1823
7.8	386.039	1847.11	6.53458	246.686	537.42	78.3596	50.9127	13.1242	492.432	1.00002	92.1972
8	386.093	1847.32	6.53103	246.71	537.432	78.3654	50.8595	13.1818	492.517	1.00002	92.2122
8.2	386.146	1847.52	6.52743	246.734	537.444	78.3711	50.8058	13.2404	492.6	1.00002	92.2274
8.4	386.197	1847.73	6.52377	246.758	537.455	78.3768	50.7515	13.2999	492.681	1.00002	92.2428
8.6	386.247	1847.93	6.52006	246.783	537.467	78.3825	50.6966	13.3605	492.76	1.00002	92.2583
8.8	386.294	1848.13	6.51629	246.807	537.479	78.3883	50.6412	13.4223	492.837	1.00002	92.2741
9	386.34	1848.33	6.51245	246.832	537.49	78.394	50.5851	13.4851	492.912	1.00002	92.29
9.2	386.384	1848.53	6.50856	246.857	537.501	78.3997	50.5283	13.5491	492.985	1.00003	92.3062
9.4	386.426	1848.72	6.5046	246.883	537.512	78.4055	50.4709	13.6144	493.056	1.00003	92.3225
9.6	386.467	1848.91	6.50057	246.908	537.523	78.4113	50.4127	13.6809	493.125	1.00003	92.3392
9.8	386.505	1849.1	6.49647	246.934	537.534	78.4171	50.3536	13.7489	493.192	1.00003	92.356
10	386.542	1849.29	6.49229	246.961	537.544	78.4229	50.2938	13.8183	493.257	1.00003	92.3732
10.2	386.577	1849.48	6.48804	246.987	537.555	78.4287	50.233	13.8892	493.32	1.00003	92.3906
10.4	386.61	1849.66	6.4837	247.014	537.565	78.4345	50.1713	13.9617	493.381	1.00003	92.4083
10.6	386.641	1849.84	6.47928	247.042	537.575	78.4404	50.1086	14.0358	493.441	1.00003	92.4263
10.8	386.671	1850.02	6.47477	247.069	537.585	78.4463	50.0449	14.1117	493.498	1.00003	92.4447
11	386.699	1850.2	6.47016	247.098	537.595	78.4523	49.9799	14.1896	493.554	1.00003	92.4635
11.2	386.725	1850.38	6.46545	247.126	537.605	78.4582	49.9139	14.2693	493.607	1.00004	92.4826
11.4	386.749	1850.56	6.46065	247.155	537.614	78.4642	49.8468	14.3509	493.659	1.00004	92.502
11.6	386.771	1850.73	6.45575	247.185	537.623	78.4703	49.7784	14.4346	493.709	1.00004	92.5219
11.8	386.791	1850.9	6.45073	247.215	537.633	78.4764	49.7087	14.5206	493.757	1.00004	92.5422
12	386.81	1851.07	6.4456	247.245	537.641	78.4825	49.6377	14.6087	493.803	1.00004	92.5629
12.2	386.826	1851.23	6.44036	247.276	537.65	78.4886	49.5653	14.6993	493.847	1.00004	92.5841
12.4	386.841	1851.4	6.435	247.307	537.658	78.4949	49.4914	14.7923	493.89	1.00004	92.6058
12.6	386.853	1851.56	6.4295	247.34	537.666	78.5011	49.4159	14.888	493.93	1.00004	92.6279
12.8	386.864	1851.72	6.42388	247.372	537.674	78.5074	49.3389	14.9865	493.969	1.00004	92.6507
13	386.873	1851.88	6.41811	247.405	537.682	78.5138	49.2602	15.0879	494.005	1.00004	92.674
13.2	386.879	1852.03	6.4122	247.439	537.689	78.5202	49.1796	15.1923	494.04	1.00005	92.6979
13.4	386.884	1852.19	6.40613	247.474	537.696	78.5267	49.0972	15.3001	494.073	1.00005	92.7224
13.6	386.887	1852.34	6.3999	247.51	537.703	78.5333	49.0129	15.4113	494.104	1.00005	92.7476
13.8	386.887	1852.49	6.39351	247.546	537.71	78.5399	48.9265	15.526	494.134	1.00005	92.7735
14	386.886	1852.64	6.38694	247.583	537.716	78.5466	48.8381	15.6445	494.161	1.00005	92.8002
14.2	386.882	1852.78	6.38019	247.62	537.721	78.5534	48.7475	15.7669	494.186	1.00005	92.8276
14.4	386.876	1852.92	6.37328	247.659	537.727	78.5603	48.6548	15.8931	494.21	1.00005	92.8558
14.6	386.869	1853.06	6.36619	247.698	537.732	78.5672	48.5601	16.0232	494.231	1.00005	92.8847
14.8	386.859	1853.2	6.35893	247.738	537.736	78.5741	48.4632	16.1574	494.251	1.00005	92.9144
15	386.846	1853.33	6.35148	247.779	537.74	78.5811	48.364	16.296	494.268	1.00005	92.945
15.2	386.832	1853.46	6.34386	247.821	537.744	78.5882	48.2629	16.4385	494.284	1.00005	92.9763
15.4	386.816	1853.59	6.33607	247.863	537.747	78.5953	48.1597	16.5851	494.298	1.00006	93.0084
15.6	386.797	1853.71	6.32812	247.906	537.749	78.6024	48.0546	16.7355	494.309	1.00006	93.0412
15.8	386.777	1853.83	6.3201	247.949	537.751	78.6094	47.9484	16.8879	494.319	1.00006	93.0742
16	386.754	1853.95	6.31202	247.993	537.752	78.6163	47.8413	17.042	494.327	1.00006	93.1075
16.2	386.73	1854.06	6.30388	248.036	537.753	78.623	47.7333	17.1976	494.333	1.00006	93.1409
16.4	386.703	1854.17	6.2957	248.079	537.753	78.6296	47.6246	17.3547	494.337	1.00006	93.1745
16.6	386.675	1854.28	6.28747	248.122	537.752	78.6361	47.5151	17.5132	494.339	1.00006	93.2082
16.8	386.645	1854.39	6.27919	248.165	537.751	78.6425	47.4049	17.6731	494.339	1.00006	93.2421
17	386.612	1854.49	6.27088	248.209	537.749	78.6487	47.294	17.8344	494.338	1.00006	93.2761
17.2	386.579	1854.58	6.26252	248.252	537.746	78.6548	47.1823	17.997	494.335	1.00006	93.3102
17.4	386.543	1854.68	6.25414	248.295	537.743	78.6607	47.0701	18.1608	494.33	1.00007	93.3444
17.6	386.506	1854.77	6.24573	248.337	537.739	78.6665	46.9574	18.3257	494.323	1.00007	93.3786
17.8	386.467	1854.85	6.23729	248.38	537.734	78.6722	46.8442	18.4916	494.316	1.00007	93.4129
18	386.427	1854.93	6.22884	248.423	537.729	78.6776	46.7305	18.6584	494.306	1.00007	93.4473
18.2	386.385	1855.01	6.22037	248.465	537.723	78.683	46.6164	18.8263	494.295	1.00007	93.4817
18.4	386.342	1855.09	6.21189	248.507	537.717	78.6882	46.5019	18.995	494.283	1.00007	93.5161
18.6	386.297	1855.16	6.20339	248.549	537.71	78.6932	46.387	19.1645	494.27	1.00007	93.5505
18.8	386.252	1855.23	6.19488	248.591	537.702	78.6981	46.2717	19.335	494.255	1.00007	93.5849
19	386.204	1855.29	6.18636	248.633	537.693	78.7028	46.156	19.5064	494.239	1.00007	93.6194
19.2	386.156	1855.35	6.17782	248.674	537.684	78.7074	46.0399	19.6787	494.222	1.00007	93.6538
19.4	386.107	1855.41	6.16927	248.715	537.675	78.7118	45.9234	19.8519	494.204	1.00008	93.6883
19.6	386.056	1855.46	6.1607	248.757	537.664	78.7161	45.8064	20.0261	494.184	1.00008	93.7229
19.8	386.004	1855.51	6.15212	248.798	537.653	78.7203	45.689	20.2013	494.164	1.00008	93.7574
20	385.951	1855.56	6.14352	248.839	537.642	78.7243	45.5711	20.3774	494.143	1.00008	93.792
20.2	385.897	1855.6	6.1349	248.879	537.629	78.7281	45.4528	20.5545	494.121	1.00008	93.8267
20.4	385.842	1855.64	6.12627	248.92	537.616	78.7318	45.334	20.7326	494.097	1.00008	93.8613
20.6	385.786	1855.68	6.11762	248.96	537.603	78.7353	45.2148	20.9117	494.073	1.00008	93.896
20.8	385.729	1855.72	6.10895	249	537.589	78.7387	45.095	21.0918	494.049	1.00008	93.9307
21	385.672	1855.75	6.10027	249.041	537.574	78.742	44.9748	21.2731	494.023	1.00008	93.9655
21.2	385.613	1855.77	6.09156	249.081	537.558	78.7451	44.854	21.4554	493.997	1.00008	94.0003
21.4	385.553	1855.8	6.08283	249.12	537.542	78.748	44.7328	21.6388	493.97	1.00008	94.0352
21.6	385.493	1855.82	6.07409	249.16	537.525	78.7509	44.6111	21.8232	493.942	1.00009	94.07
21.8	385.432	1855.84	6.06533	249.2	537.508	78.7535	44.489	22.0086	493.914	1.00009	94.1049
22	385.37	1855.86	6.05656	249.239	537.49	78.756	44.3664	22.195	493.885	1.00009	94.1399
22.2	385.308	1855.87	6.04777	249.278	537.471	78.7584	44.2435	22.3823	493.856	1.00009	94.1748
22.4	385.245	1855.88	6.03897	249.318	537.451	78.7606	44.1202	22.5706	493.826	1.00009	94.2097
22.6	385.181	1855.89	6.03017	249.356	537.431	78.7626	43.9965	22.7597	493.795	1.00009	94.2446
22.8	385.117	1855.89	6.02135	249.395	537.411	78.7645	43.8724	22.9498	493.765	1.00009	94.2796
23	385.052	1855.9	6.01252	249.434	537.389	78.7663	43.748	23.1408	493.733	1.00009	94.3145
23.2	384.987	1855.9	6.00368	249.472	537.367	78.7679	43.6232	23.3327	493.702	1.00009	94.3495
23.4	384.921	1855.89	5.99483	249.51	537.345	78.7693	43.498	23.5256	493.67	1.00009	94.3844
23.6	384.855	1855.89	5.98596	249.549	537.322	78.7706	43.3725	23.7194	493.638	1.0001	94.4193
23.8	384.788	1855.88	5.97709	249.586	537.298	78.7717	43.2466	23.9141	493.605	1.0001	94.4543
24	384.721	1855.87	5.96821	249.624	537.273	78.7727	43.1204	24.1097	493.573	1.0001	94.4892
24.2	384.654	1855.86	5.95932	249.662	537.248	78.7735	42.9939	24.3062	493.54	1.0001	94.5241
24.4	384.587	1855.84	5.95042	249.699	537.222	78.7741	42.8672	24.5035	493.507	1.0001	94.559
24.6	384.519	1855.82	5.94153	249.736	537.196	78.7746	42.7404	24.7012	493.473	1.0001	94.5938
24.8	384.451	1855.8	5.93264	249.773	537.169	78.7749	42.6133	24.8998	493.44	1.0001	94.6285
25	384.383	1855.78	5.92374	249.81	537.141	78.7751	42.486	25.0992	493.407	1.0001	94.6633
25.2	384.314	1855.76	5.91483	249.846	537.113	78.7751	42.3585	25.2994	493.373	1.0001	94.698
25.4	384.246	1855.73	5.90593	249.882	537.084	78.7749	42.2307	25.5003	493.339	1.0001	94.7326
25.6	384.177	1855.7	5.89702	249.919	537.054	78.7746	42.1028	25.7019	493.306	1.0001	94.7672
25.8	384.109	1855.67	5.88811	249.954	537.024	78.7741	41.9747	25.9044	493.272	1.00011	94.8018
26	384.04	1855.64	5.8792	249.99	536.994	78.7734	41.8464	26.1075	493.239	1.00011	94.8363
26.2	383.971	1855.6	5.87028	250.026	536.962	78.7726	41.7179	26.3114	493.205	1.00011	94.8708
26.4	383.902	1855.57	5.86135	250.061	536.93	78.7716	41.5892	26.5161	493.171	1.00011	94.9053
26.6	383.833	1855.53	5.85243	250.096	536.898	78.7704	41.4604	26.7215	493.138	1.00011	94.9396
26.8	383.764	1855.49	5.84351	250.131	536.864	78.7691	41.3314	26.9276	493.104	1.00011	94.974
27	383.695	1855.45	5.83458	250.165	536.83	78.7676	41.2023	27.1343	493.071	1.00011	95.0082
27.2	383.626	1855.4	5.82566	250.2	536.796	78.7659	41.0731	27.3418	493.038	1.00011	95.0425
27.4	383.558	1855.36	5.81674	250.234	536.761	78.764	40.9438	27.5498	493.005	1.00011	95.0766
27.6	383.489	1855.31	5.80781	250.268	536.725	78.762	40.8144	27.7586	492.972	1.00011	95.1107
27.8	383.42	1855.26	5.79889	250.301	536.689	78.7598	40.6849	27.9679	492.939	1.00012	95.1447
28	383.352	1855.21	5.78998	250.335	536.652	78.7574	40.5554	28.1779	492.907	1.00012	95.1786
28.2	383.284	1855.16	5.78105	250.368	536.614	78.7549	40.4257	28.3886	492.875	1.00012	95.2125
28.4	383.216	1855.11	5.77213	250.401	536.576	78.7521	40.296	28.5999	492.843	1.00012	95.2463
28.6	383.148	1855.05	5.76322	250.434	536.537	78.7492	40.1663	28.8116	492.811	1.00012	95.28
28.8	383.08	1855	5.75431	250.466	536.498	78.7461	40.0366	29.024	492.779	1.00012	95.3137
29	383.012	1854.94	5.74541	250.498	536.458	78.7428	39.9068	29.237	492.748	1.00012	95.3472
29.2	382.945	1854.88	5.7365	250.53	536.417	78.7393	39.777	29.4506	492.717	1.00012	95.3807
29.4	382.878	1854.82	5.72759	250.562	536.376	78.7357	39.6471	29.6649	492.686	1.00012	95.4141
29.6	382.811	1854.76	5.71869	250.594	536.334	78.7318	39.5173	29.8797	492.656	1.00012	95.4475
29.8	382.744	1854.7	5.70979	250.625	536.291	78.7278	39.3874	30.095	492.625	1.00012	95.4807
30	382.678	1854.64	5.70089	250.656	536.248	78.7236	39.2575	30.311	492.595	1.00013	95.5139
30.2	382.611	1854.57	5.69199	250.686	536.205	78.7192	39.1276	30.5276	492.566	1.00013	95.547
30.4	382.546	1854.51	5.68309	250.717	536.16	78.7145	38.9975	30.745	492.536	1.00013	95.58
30.6	382.48	1854.44	5.67421	250.747	536.115	78.7097	38.8678	30.9624	492.508	1.00013	95.6129
30.8	382.415	1854.37	5.66533	250.777	536.069	78.7048	38.738	31.1805	492.479	1.00013	95.6458
31	382.35	1854.3	5.65645	250.807	536.023	78.6996	38.6082	31.3991	492.451	1.00013	95.6785
31.2	382.285	1854.24	5.64757	250.836	535.976	78.6942	38.4784	31.6185	492.423	1.00013	95.7112
31.4	382.22	1854.17	5.63869	250.865	535.929	78.6886	38.3485	31.8384	492.395	1.00013	95.7438
31.6	382.156	1854.09	5.6298	250.894	535.881	78.6828	38.2186	32.0592	492.368	1.00013	95.7763
31.8	382.092	1854.02	5.62091	250.923	535.832	78.6768	38.0885	32.2807	492.341	1.00013	95.8088
32	382.028	1853.95	5.61201	250.951	535.782	78.6706	37.9584	32.5029	492.315	1.00014	95.8412
32.2	381.965	1853.88	5.60311	250.979	535.732	78.6641	37.8283	32.7257	492.288	1.00014	95.8736
32.4	381.902	1853.8	5.59421	251.007	535.681	78.6575	37.6981	32.9492	492.262	1.00014	95.9059
32.6	381.839	1853.73	5.58531	251.035	535.629	78.6507	37.568	33.1734	492.237	1.00014	95.9381
32.8	381.776	1853.65	5.5764	251.062	535.577	78.6436	37.4377	33.3983	492.212	1.00014	95.9702
33	381.714	1853.57	5.56748	251.09	535.524	78.6363	37.3074	33.6241	492.187	1.00014	96.0023
33.2	381.652	1853.5	5.55856	251.116	535.47	78.6288	37.1769	33.8506	492.163	1.00014	96.0343
33.4	381.59	1853.42	5.54963	251.143	535.415	78.6211	37.0464	34.0779	492.139	1.00014	96.0663
33.6	381.529	1853.34	5.54069	251.169	535.36	78.6131	36.9157	34.3061	492.115	1.00014	96.0983
33.8	381.467	1853.26	5.53174	251.195	535.304	78.6049	36.7851	34.5348	492.092	1.00014	96.1301
34	381.406	1853.18	5.52279	251.221	535.248	78.5965	36.6544	34.7644	492.069	1.00014	96.1619
34.2	381.346	1853.1	5.51384	251.247	535.19	78.5878	36.5237	34.9945	492.047	1.00015	96.1937
34.4	381.286	1853.02	5.50488	251.272	535.132	78.5789	36.3929	35.2255	492.025	1.00015	96.2253
34.6	381.225	1852.94	5.49591	251.297	535.073	78.5698	36.2619	35.4574	492.003	1.00015	96.2569
34.8	381.166	1852.86	5.48692	251.322	535.013	78.5604	36.1308	35.6903	491.981	1.00015	96.2885
35	381.106	1852.78	5.47792	251.346	534.953	78.5508	35.9996	35.9239	491.96	1.00015	96.3201
35.2	381.047	1852.69	5.46891	251.37	534.892	78.541	35.8683	36.1585	491.94	1.00015	96.3516
35.4	380.987	1852.61	5.45989	251.394	534.83	78.5308	35.7367	36.3941	491.92	1.00015	96.383
35.6	380.929	1852.53	5.45085	251.418	534.767	78.5204	35.6051	36.6306	491.9	1.00015	96.4144
35.8	380.87	1852.44	5.4418	251.441	534.703	78.5098	35.4733	36.868	491.88	1.00015	96.4458
36	380.811	1852.36	5.43272	251.464	534.638	78.4989	35.3412	37.1064	491.861	1.00015	96.4772
36.2	380.753	1852.27	5.42364	251.487	534.573	78.4877	35.2091	37.3458	491.843	1.00016	96.5085
36.4	380.695	1852.19	5.41454	251.51	534.506	78.4763	35.0767	37.5863	491.824	1.00016	96.5397
36.6	380.638	1852.1	5.40542	251.532	534.439	78.4646	34.9442	37.8277	491.806	1.00016	96.571
36.8	380.58	1852.02	5.39628	251.554	534.371	78.4526	34.8115	38.0701	491.789	1.00016	96.6022
37	380.523	1851.93	5.38713	251.575	534.302	78.4403	34.6787	38.3134	491.771	1.00016	96.6333
37.2	380.466	1851.85	5.37797	251.597	534.232	78.4278	34.5458	38.5576	491.755	1.00016	96.6644
37.4	380.409	1851.76	5.36881	251.618	534.162	78.415	34.413	38.8023	491.738	1.00016	96.6954
37.6	380.352	1851.67	5.35964	251.638	534.09	78.4019	34.2801	39.0478	491.722	1.00016	96.7263
37.8	380.296	1851.59	5.35046	251.658	534.018	78.3885	34.1471	39.2942	491.707	1.00016	96.7572
38	380.24	1851.5	5.34125	251.678	533.944	78.3749	34.0138	39.5419	491.691	1.00016	96.7881
38.2	380.184	1851.41	5.33203	251.698	533.87	78.3609	33.8805	39.7902	491.676	1.00016	96.8189
38.4	380.128	1851.33	5.32282	251.717	533.795	78.3467	33.7473	40.0391	491.662	1.00017	96.8495
38.6	380.073	1851.24	5.31359	251.736	533.719	78.3322	33.6139	40.289	491.648	1.00017	96.8802
38.8	380.018	1851.15	5.30434	251.755	533.642	78.3174	33.4805	40.5396	491.634	1.00017	96.9108
39	379.963	1851.07	5.2951	251.773	533.565	78.3023	33.3471	40.791	491.621	1.00017	96.9413
39.2	379.908	1850.98	5.28583	251.791	533.486	78.2869	33.2136	41.0432	491.607	1.00017	96.9717
39.4	379.854	1850.89	5.27656	251.808	533.406	78.2712	33.08	41.2964	491.595	1.00017	97.0021
39.6	379.8	1850.81	5.26728	251.826	533.326	78.2552	32.9464	41.5501	491.582	1.00017	97.0323
39.8	379.745	1850.72	5.258	251.842	533.245	78.239	32.8129	41.8044	491.57	1.00017	97.0625
40	379.692	1850.63	5.24872	251.859	533.163	78.2224	32.6796	42.0591	491.559	1.00017	97.0926
40.2	379.638	1850.55	5.23945	251.875	533.08	78.2056	32.5465	42.3141	491.548	1.00017	97.1225
40.4	379.585	1850.46	5.23019	251.89	532.996	78.1884	32.4136	42.5693	491.537	1.00018	97.1523
40.6	379.532	1850.37	5.22092	251.905	532.911	78.171	32.2807	42.8253	491.526	1.00018	97.182
40.8	379.479	1850.29	5.21165	251.92	532.826	78.1533	32.1479	43.0818	491.516	1.00018	97.2116
41	379.427	1850.2	5.20239	251.934	532.74	78.1353	32.0153	43.3385	491.506	1.00018	97.2411
41.2	379.375	1850.12	5.19313	251.948	532.652	78.117	31.883	43.5955	491.497	1.00018	97.2704
41.4	379.323	1850.03	5.18388	251.961	532.565	78.0984	31.7507	43.8531	491.488	1.00018	97.2997
41.6	379.271	1849.95	5.17462	251.974	532.476	78.0795	31.6185	44.1112	491.479	1.00018	97.3288
41.8	379.22	1849.86	5.16535	251.987	532.386	78.0603	31.4863	44.3699	491.471	1.00018	97.3579
42	379.168	1849.78	5.15609	251.999	532.295	78.0408	31.3543	44.6289	491.462	1.00018	97.3868
42.2	379.117	1849.7	5.14683	252.011	532.203	78.0209	31.2224	44.8884	491.455	1.00018	97.4155
42.4	379.066	1849.61	5.13756	252.022	532.111	78.0008	31.0906	45.1486	491.447	1.00019	97.4443
42.6	379.015	1849.53	5.12829	252.033	532.017	77.9803	30.9588	45.4093	491.44	1.00019	97.4729
42.8	378.964	1849.45	5.11902	252.043	531.923	77.9595	30.8272	45.6704	491.433	1.00019	97.5013
43	378.914	1849.36	5.10977	252.053	531.827	77.9384	30.696	45.9313	491.426	1.00019	97.5296
43.2	378.864	1849.28	5.10053	252.062	531.731	77.9171	30.565	46.1925	491.42	1.00019	97.5578
43.4	378.814	1849.2	5.09128	252.071	531.634	77.8954	30.4341	46.4542	491.414	1.00019	97.5858
43.6	378.764	1849.12	5.08203	252.08	531.536	77.8733	30.3032	46.7164	491.408	1.00019	97.6137
43.8	378.714	1849.04	5.07277	252.088	531.437	77.8509	30.1724	46.9794	491.402	1.00019	97.6416
44	378.664	1848.96	5.06352	252.095	531.337	77.8282	30.0417	47.2426	491.397	1.00019	97.6693
44.2	378.614	1848.88	5.05427	252.102	531.236	77.8052	29.9113	47.506	491.392	1.00019	97.6969
44.4	378.565	1848.8	5.04502	252.109	531.134	77.7818	29.7811	47.7697	491.387	1.00019	97.7243
44.6	378.516	1848.72	5.03577	252.115	531.031	77.7581	29.651	48.0339	491.383	1.0002	97.7516
44.8	378.466	1848.64	5.02653	252.12	530.928	77.7341	29.5211	48.2983	491.378	1.0002	97.7788
45	378.417	1848.56	5.01729	252.125	530.823	77.7098	29.3913	48.5631	491.374	1.0002	97.8058
45.2	378.368	1848.48	5.00806	252.13	530.717	77.6851	29.2618	48.8279	491.371	1.0002	97.8327
45.4	378.32	1848.4	4.99883	252.134	530.61	77.6601	29.1327	49.0929	491.367	1.0002	97.8594
45.6	378.271	1848.33	4.98962	252.137	530.503	77.6347	29.0038	49.3578	491.364	1.0002	97.8859
45.8	378.222	1848.25	4.9804	252.14	530.394	77.609	28.8749	49.6235	491.36	1.0002	97.9124
46	378.174	1848.17	4.97116	252.142	530.284	77.5829	28.746	49.8899	491.358	1.0002	97.9387
46.2	378.125	1848.1	4.96192	252.144	530.173	77.5565	28.6171	50.1569	491.355	1.0002	97.965
46.4	378.076	1848.02	4.95266	252.145	530.061	77.5296	28.4881	50.4246	491.352	1.0002	97.9911
46.6	378.028	1847.94	4.94339	252.146	529.947	77.5023	28.3592	50.6931	491.35	1.00021	98.0172
46.8	377.979	1847.87	4.93411	252.146	529.832	77.4746	28.2303	50.962	491.348	1.00021	98.0431
47	377.93	1847.79	4.92481	252.146	529.716	77.4464	28.1013	51.2319	491.346	1.00021	98.0689
47.2	377.881	1847.72	4.9155	252.145	529.599	77.4179	27.9723	51.5024	491.344	1.00021	98.0946
47.4	377.833	1847.64	4.90618	252.143	529.48	77.389	27.8433	51.7736	491.342	1.00021	98.1202
47.6	377.784	1847.57	4.89685	252.141	529.36	77.3596	27.7144	52.0453	491.341	1.00021	98.1457
47.8	377.735	1847.5	4.88749	252.138	529.239	77.3298	27.5853	52.318	491.339	1.00021	98.1711
48	377.686	1847.42	4.8781	252.135	529.116	77.2994	27.4559	52.592	491.338	1.00021	98.1964
48.2	377.636	1847.35	4.8687	252.131	528.991	77.2686	27.3265	52.8667	491.337	1.00021	98.2216
48.4	377.587	1847.28	4.8593	252.126	528.866	77.2374	27.1974	53.1413	491.336	1.00021	98.2466
48.6	377.538	1847.2	4.84991	252.121	528.739	77.2059	27.0686	53.4161	491.336	1.00021	98.2715
48.8	377.489	1847.13	4.8405	252.115	528.611	77.1738	26.9396	53.6918	491.335	1.00022	98.2962
49	377.439	1847.06	4.83109	252.108	528.482	77.1413	26.8108	53.9678	491.335	1.00022	98.3208
49.2	377.39	1846.99	4.82165	252.101	528.351	77.1083	26.6819	54.2448	491.335	1.00022	98.3453
49.4	377.34	1846.91	4.81217	252.093	528.218	77.0748	26.5527	54.523	491.334	1.00022	98.3697
49.6	377.29	1846.84	4.80266	252.084	528.083	77.0407	26.4232	54.8025	491.334	1.00022	98.394
49.8	377.24	1846.77	4.79311	252.074	527.947	77.006	26.2933	55.0834	491.335	1.00022	98.4183
50	377.19	1846.7	4.78353	252.064	527.808	76.9707	26.1633	55.3654	491.335	1.00022	98.4424
50.2	377.139	1846.63	4.7739	252.053	527.668	76.9348	26.0329	55.6489	491.335	1.00022	98.4665
50.4	377.088	1846.56	4.76425	252.041	527.526	76.8984	25.9024	55.9331	491.336	1.00022	98.4904
50.6	377.037	1846.49	4.75456	252.028	527.382	76.8613	25.7716	56.2188	491.336	1.00022	98.5143
50.8	376.985	1846.41	4.74481	252.015	527.235	76.8235	25.6402	56.5063	491.337	1.00023	98.5381
51	376.933	1846.34	4.73502	252	527.087	76.785	25.5085	56.7953	491.338	1.00023	98.5618
51.2	376.881	1846.27	4.72516	251.985	526.935	76.7458	25.3761	57.0864	491.339	1.00023	98.5855
51.4	376.828	1846.2	4.71522	251.969	526.781	76.7058	25.2429	57.38	491.34	1.00023	98.6091
51.6	376.774	1846.13	4.70521	251.951	526.625	76.6649	25.109	57.6759	491.341	1.00023	98.6327
51.8	376.721	1846.06	4.69529	251.933	526.468	76.6239	24.9766	57.9689	491.343	1.00023	98.6559
52	376.668	1845.99	4.68531	251.914	526.309	76.5821	24.8437	58.264	491.344	1.00023	98.6789
52.2	376.614	1845.91	4.67522	251.894	526.146	76.5393	24.7096	58.5622	491.346	1.00023	98.702
52.4	376.559	1845.84	4.66501	251.873	525.979	76.4954	24.5742	58.8641	491.348	1.00023	98.7252
52.6	376.503	1845.77	4.65468	251.85	525.809	76.4504	24.4374	59.1698	491.35	1.00023	98.7484
52.8	376.447	1845.7	4.64424	251.826	525.635	76.4043	24.2996	59.4784	491.352	1.00023	98.7715
53	376.389	1845.62	4.63367	251.801	525.457	76.357	24.1603	59.7912	491.354	1.00024	98.7947
53.2	376.331	1845.55	4.62294	251.774	525.274	76.3084	24.0193	60.1085	491.356	1.00024	98.818
53.4	376.272	1845.47	4.61208	251.746	525.088	76.2585	23.8769	60.4296	491.359	1.00024	98.8413
53.6	376.212	1845.39	4.60106	251.717	524.896	76.2073	23.7328	60.7553	491.361	1.00024	98.8646
53.8	376.15	1845.32	4.58989	251.685	524.699	76.1546	23.587	61.0855	491.364	1.00024	98.888
54	376.088	1845.24	4.57852	251.652	524.497	76.1002	23.4391	61.4213	491.367	1.00024	98.9114
54.2	376.024	1845.16	4.56695	251.617	524.289	76.0442	23.2889	61.7631	491.37	1.00024	98.9349
54.4	375.959	1845.08	4.55518	251.58	524.075	75.9864	23.1366	62.1104	491.374	1.00024	98.9586
54.6	375.892	1844.99	4.54317	251.541	523.854	75.9266	22.9817	62.4646	491.377	1.00024	98.9823
54.8	375.824	1844.91	4.5309	251.5	523.626	75.8647	22.8239	62.8261	491.381	1.00024	99.0062
55	375.754	1844.82	4.51839	251.456	523.39	75.8006	22.6634	63.1945	491.385	1.00025	99.0301
55.2	375.682	1844.73	4.50558	251.41	523.146	75.7341	22.4996	63.5715	491.39	1.00025	99.0543
55.4	375.609	1844.64	4.49249	251.36	522.893	75.6652	22.3327	63.9563	491.394	1.00025	99.0785
55.6	375.533	1844.55	4.47904	251.308	522.631	75.5935	22.1619	64.351	491.399	1.00025	99.1029
55.8	375.455	1844.45	4.46533	251.253	522.359	75.5192	21.9883	64.7532	491.405	1.00025	99.1274
56	375.375	1844.35	4.45129	251.194	522.078	75.4421	21.8112	65.1642	491.41	1.00025	99.1519
56.2	375.294	1844.25	4.43696	251.132	521.788	75.3622	21.631	65.5831	491.416	1.00025	99.1765
56.4	375.21	1844.15	4.42232	251.067	521.487	75.2795	21.4478	66.01	491.423	1.00025	99.2009
56.6	375.124	1844.04	4.4075	250.998	521.178	75.1943	21.2628	66.4419	491.43	1.00025	99.2252
56.8	375.037	1843.94	4.39239	250.926	520.86	75.1063	21.0751	66.881	491.437	1.00025	99.2493
57	374.948	1843.83	4.37706	250.85	520.532	75.0156	20.8855	67.3254	491.445	1.00025	99.2731
57.2	374.858	1843.71	4.36152	250.771	520.195	74.9223	20.6941	67.7746	491.453	1.00026	99.2965
57.4	374.766	1843.6	4.3458	250.688	519.849	74.8264	20.5013	68.228	491.462	1.00026	99.3195
57.6	374.672	1843.48	4.32989	250.6	519.494	74.7278	20.3071	68.6853	491.471	1.00026	99.3421
57.8	374.577	1843.36	4.31383	250.509	519.13	74.6267	20.112	69.1455	491.481	1.00026	99.3641
58	374.481	1843.24	4.29753	250.414	518.755	74.5224	19.915	69.611	491.492	1.00026	99.3856
58.2	374.382	1843.11	4.28103	250.314	518.369	74.4151	19.7167	70.0799	491.503	1.00026	99.4065
58.4	374.281	1842.98	4.26425	250.208	517.971	74.3042	19.516	70.5551	491.515	1.00026	99.4269
58.6	374.177	1842.85	4.24699	250.096	517.555	74.1881	19.3108	71.0416	491.528	1.00026	99.4469
58.8	374.07	1842.71	4.22931	249.977	517.121	74.0672	19.1019	71.5373	491.542	1.00026	99.4663
59	373.96	1842.56	4.21119	249.85	516.669	73.941	18.8891	72.0428	491.557	1.00026	99.4851
59.2	373.845	1842.41	4.19251	249.715	516.194	73.8086	18.6712	72.5606	491.574	1.00026	99.5033
59.4	373.726	1842.24	4.17322	249.571	515.695	73.6694	18.4477	73.0918	491.592	1.00027	99.5208
59.6	373.602	1842.07	4.15327	249.416	515.169	73.5226	18.2182	73.6376	491.611	1.00027	99.5374
59.8	373.473	1841.89	4.13248	249.248	514.611	73.3668	17.981	74.2016	491.633	1.00027	99.5532
60	373.336	1841.7	4.11074	249.066	514.015	73.2006	17.735	74.7864	491.657	1.00027	99.5679
60.2	373.192	1841.49	4.08792	248.867	513.376	73.0224	17.4789	75.3948	491.684	1.00027	99.5815
60.4	373.039	1841.26	4.06394	248.649	512.69	72.8313	17.2123	76.0274	491.714	1.00027	99.5936
60.6	372.876	1841.01	4.03854	248.41	511.947	72.6245	16.933	76.6895	491.748	1.00027	99.604
60.8	372.701	1840.74	4.01157	248.144	511.139	72.3998	16.6394	77.3839	491.786	1.00027	99.6123
61	372.514	1840.45	3.98281	247.849	510.256	72.1546	16.33	78.1139	491.829	1.00027	99.6179
61.2	372.31	1840.12	3.95174	247.516	509.276	71.8831	15.9999	78.89	491.879	1.00027	99.6203
61.4	372.085	1839.74	3.91786	247.135	508.179	71.5794	15.645	79.7211	491.938	1.00027	99.6185
61.6	371.836	1839.31	3.88066	246.697	506.938	71.237	15.2611	80.6153	492.006	1.00028	99.6114
61.8	371.556	1838.82	3.83932	246.186	505.517	70.8456	14.8416	81.5861	492.088	1.00028	99.5972
62	371.24	1838.24	3.79301	245.583	503.873	70.3939	14.3802	82.645	492.187	1.00028	99.5734
62.2	370.88	1837.56	3.74085	244.866	501.955	69.8689	13.8712	83.8005	492.307	1.00028	99.537
62.4	370.463	1836.73	3.6812	243.998	499.678	69.248	13.3025	85.0747	492.455	1.00028	99.4829
62.6	369.975	1835.73	3.6122	242.933	496.939	68.5036	12.6618	86.486	492.641	1.00028	99.4043
62.8	369.403	1834.5	3.53246	241.621	493.637	67.6096	11.9434	88.0339	492.874	1.00028	99.2928
63	368.736	1833	3.44056	240.006	489.654	66.5357	11.1434	89.7093	493.166	1.00028	99.1373
63.2	367.967	1831.17	3.33601	238.036	484.902	65.2588	10.2682	91.4744	493.527	1.00028	98.9258
63.4	367.116	1829.04	3.2216	235.719	479.436	63.7946	9.35249	93.2313	493.958	1.00028	98.6519
63.6	366.214	1826.65	3.10182	233.108	473.41	62.1859	8.44022	94.867	494.448	1.00028	98.3163
63.8	365.283	1824.04	2.9796	230.243	466.934	60.4634	7.55819	96.3097	494.99	1.00028	97.9202
64	364.349	1821.26	2.85849	227.192	460.175	58.6742	6.73308	97.4972	495.572	1.00028	97.4708
64.2	363.398	1818.26	2.73681	223.906	453.028	56.7935	5.95249	98.4349	496.205	1.00028	96.9599
64.4	362.432	1815.03	2.6149	220.386	445.499	54.826	5.21843	99.1066	496.888	1.00028	96.3859
64.6	361.475	1811.64	2.49611	216.724	437.791	52.8278	4.54908	99.4889	497.607	1.00029	95.7632
64.8	360.567	1808.21	2.38562	213.095	430.253	50.8971	3.96831	99.5798	498.332	1.00029	95.1231
65	359.687	1804.66	2.28173	209.464	422.793	49.0201	3.46009	99.4066	499.077	1.00029	94.4623
65.2	358.801	1800.82	2.18102	205.72	415.162	47.1471	3.00385	98.9725	499.874	1.00029	93.7622
65.4	357.831	1796.31	2.07594	201.559	406.731	45.1418	2.56659	98.2193	500.799	1.00029	92.9645
65.6	356.634	1790.33	1.9517	196.3	396.153	42.7024	2.09749	96.9425	502.01	1.00029	91.9304
65.8	355.479	1784.06	1.83813	191.107	385.78	40.406	1.71859	95.3514	503.259	1.00029	90.8814
66	354.083	1775.91	1.70805	184.682	373.026	37.7061	1.33989	93.0201	504.864	1.00029	89.5491
66.2	352.605	1766.63	1.57618	177.582	359.08	34.8783	1.01548	90.0608	506.666	1.00029	88.0291
66.4	351.149	1756.88	1.45143	170.265	344.866	32.1207	0.760592	86.6801	508.535	1.00029	86.4101
66.6	349.717	1746.68	1.33386	162.787	330.471	29.4579	0.563079	82.9566	510.45	1.00029	84.7019
66.8	348.311	1736.09	1.22363	155.215	316.007	26.9157	0.41234	78.9766	512.385	1.00029	82.918
67	346.933	1725.15	1.12054	147.6	301.549	24.5089	0.298688	74.8141	514.32	1.00029	81.0685
67.2	345.583	1713.9	1.02439	139.989	287.169	22.2482	0.214049	70.5378	516.231	1.00029	79.1639
67.4	344.259	1702.39	0.934915	132.427	272.931	20.1396	0.151758	66.2083	518.097	1.00029	77.214
67.6	342.965	1690.66	0.851832	124.953	258.895	18.1857	0.106452	61.8786	519.894	1.00029	75.2287
67.8	341.701	1678.79	0.774862	117.606	245.118	16.3856	0.0738832	57.5948	521.602	1.00029	73.2177
68	340.47	1666.83	0.703736	110.42	231.658	14.7361	0.0507417	53.3972	523.198	1.00029	71.1912
68.2	339.276	1654.87	0.638225	103.435	218.576	13.2328	0.0344909	49.3219	524.662	1.00029	69.1607
68.4	338.125	1643.01	0.578184	96.6942	205.954	11.8712	0.0232191	45.4058	525.976	1.00029	67.1413
68.6	337.024	1631.37	0.523612	90.2611	193.901	10.6491	0.0155113	41.6919	527.121	1.00029	65.1553
68.8	335.976	1619.98	0.474264	84.1698	182.472	9.55916	0.0102941	38.2049	528.092	1.00029	63.219
69	334.968	1608.71	0.429321	78.3747	171.573	8.5808	0.00675766	34.9215	528.894	1.00029	61.3236
69.2	334.005	1597.62	0.388933	72.9468	161.32	7.71574	0.00441083	31.8844	529.514	1.00029	59.499
69.4	333.042	1586.16	0.351132	67.6593	151.272	6.92053	0.0028097	28.9694	529.969	1.00029	57.6734
69.6	332.09	1574.44	0.316401	62.6053	141.597	6.20329	0.00175782	26.2302	530.224	1.00029	55.8801
69.8	331.121	1562.1	0.28374	57.6622	132.043	5.54227	0.00106705	23.6038	530.252	1.00029	54.0765
70	330.132	1549.09	0.252941	52.8094	122.57	4.93073	0.000626075	21.0819	530.002	1.00029	52.2505
70.2	329.147	1535.75	0.224465	48.1342	113.356	4.37406	0.000357702	18.709	529.432	1.00029	50.4286
70.4	328.194	1522.51	0.198895	43.764	104.66	3.88061	0.000201781	16.5454	528.53	1.00029	48.6603
70.6	327.263	1509.25	0.175752	39.6529	96.3861	3.43934	0.000111819	14.5643	527.274	1.00029	46.93
70.8	326.358	1496.05	0.154877	35.8039	88.547	3.04528	6.09255e-05	12.7616	525.653	1.00029	45.2397
71	325.486	1483.08	0.136197	32.2339	81.185	2.69523	3.2742e-05	11.1384	523.679	1.00029	43.5986
71.2	324.653	1470.44	0.119582	28.9491	74.3242	2.38535	1.73872e-05	9.68941	521.378	1.00029	42.0127
71.4	323.865	1458.25	0.104975	25.9682	68.0138	2.11366	9.16718e-06	8.41452	518.793	1.00029	40.4977
71.6	323.111	1446.34	0.0920588	23.2545	62.1813	1.87396	4.77463e-06	7.29034	515.914	1.00029	39.0431
71.8	322.38	1434.49	0.0805484	20.7697	56.748	1.66082	2.44161e-06	6.2948	512.698	1.00029	37.6349
72	321.659	1422.49	0.0701838	18.474	51.6299	1.46924	1.21698e-06	5.40703	509.081	1.00029	36.254
72.2	320.943	1410.32	0.0608023	16.343	46.7812	1.29563	5.88944e-07	4.61283	505.023	1.00029	34.8837
72.4	320.253	1398.34	0.0525282	14.4165	42.3083	1.14168	2.80993e-07	3.92116	500.639	1.00029	33.5505
72.6	319.589	1386.6	0.0452568	12.6834	38.1981	1.00532	1.32319e-07	3.32204	495.962	1.00029	32.2528
72.8	318.951	1375.12	0.0388868	11.1308	34.4337	0.88465	6.15412e-08	2.80557	491.028	1.00029	30.989
73	318.339	1363.88	0.0333202	9.74441	30.9942	0.777873	2.82742e-08	2.36205	485.87	1.00029	29.7562
73.2	317.751	1352.91	0.0284678	8.51041	27.8585	0.683407	1.28336e-08	1.98257	480.525	1.00029	28.552
73.4	317.187	1342.2	0.0242494	7.4153	25.0056	0.599848	5.75549e-09	1.65901	475.032	1.00029	27.3743
73.6	316.646	1331.75	0.0205924	6.44627	22.4151	0.525961	2.55059e-09	1.38407	469.431	1.00029	26.2211
73.8	316.127	1321.56	0.0174315	5.59114	20.067	0.460648	1.11701e-09	1.15122	463.761	1.00029	25.0911
74	315.629	1311.64	0.0147074	4.83845	17.9422	0.402935	4.83434e-10	0.954621	458.065	1.00029	23.983
74.2	315.151	1302	0.0123687	4.17797	16.0236	0.35199	2.06851e-10	0.789237	452.387	1.00029	22.8969
74.4	314.694	1292.64	0.0103688	3.6002	14.2949	0.30708	8.75325e-11	0.650623	446.769	1.00029	21.8332
74.6	314.255	1283.55	0.00866356	3.09576	12.7386	0.267507	3.66156e-11	0.534753	441.242	1.00029	20.7919
74.8	313.834	1274.72	0.00721124	2.65528	11.3359	0.232582	1.5115e-11	0.43796	435.831	1.00029	19.7704
75	313.432	1266.22	0.00598502	2.27346	10.0801	0.201932	6.17726e-12	0.357728	430.6	1.00029	18.7747
75.2	313.048	1258.02	0.00495462	1.9437	8.95865	0.175114	2.49937e-12	0.291509	425.575	1.00029	17.8079
75.4	312.679	1250.05	0.00408506	1.65729	7.9502	0.151502	9.948e-13	0.236609	420.732	1.00029	16.8636
75.6	312.324	1242.33	0.00335785	1.41041	7.04923	0.13085	3.90658e-13	0.191472	416.11	1.00029	15.948
75.8	311.98	1234.76	0.00274799	1.19674	6.23929	0.112719	1.50513e-13	0.15427	411.674	1.00029	15.0571
76	311.643	1227.28	0.00223423	1.01057	5.50482	0.0966819	5.65664e-14	0.123467	407.397	1.00029	14.1822
76.2	311.317	1220.03	0.00180884	0.850728	4.84836	0.0826708	2.09593e-14	0.0983563	403.368	1.00029	13.3332
76.4	311.006	1213.09	0.00146276	0.715777	4.27077	0.0706356	7.72494e-15	0.0782374	399.641	1.00029	12.525
76.6	310.699	1206.24	0.0011746	0.598985	3.74828	0.0600463	2.7755e-15	0.0617611	396.097	1.00029	11.7354
76.8	310.404	1199.66	0.000939987	0.499914	3.28502	0.0508923	9.86891e-16	0.0485461	392.829	1.00029	10.9773
77	310.123	1193.42	0.000751841	0.417118	2.87997	0.0431011	3.49735e-16	0.0381092	389.859	1.00029	10.2622
77.2	309.846	1187.36	0.00059723	0.346134	2.5154	0.0363109	1.20924e-16	0.0296814	387.09	1.00029	9.57053
77.4	309.588	1181.87	0.00047267	0.28622	2.19358	0.0304438	4.14821e-17	0.022982	384.635	1.00029	8.90419
77.6	309.38	1177.56	0.000383339	0.241391	1.94457	0.0259402	1.52198e-17	0.0182117	382.757	1.00029	8.34903
77.8	309.19	1173.57	0.000313652	0.205114	1.73384	0.0222258	5.28329e-18	0.0145526	381.118	1.00029	7.82546
78	308.944	1167.61	0.00024109	0.167046	1.50345	0.018473	1.33184e-18	0.0108974	378.96	1.00029	7.34075
78.2	308.623	1161.02	0.000179142	0.130614	1.25345	0.0146245	3.31409e-19	0.00786764	376.761	1.00029	6.60412
78.4	308.469	1156.95	0.000143294	0.110709	1.12557	0.0126419	7.9848e-20	0.00611705	375.444	1.00029	6.33246
78.6	308.048	1148.3	9.32627e-05	0.0775321	0.86745	0.00899634	1.64575e-20	0.00379796	373.029	1.00029	5.47993

## Sheet: scenarios
depth	SCEN1	SCEN2	SCEN3	SCEN4
0	-5.42101e-17	1	0	0
0.2	0	0.999021	1.80317e-05	5.09601
0.4	-8.05161e-05	0.998037	3.63831e-05	10.1711
0.6	-0.000161035	0.997049	5.51714e-05	15.2221
0.8	-0.000161039	0.996057	7.45713e-05	20.2488
1	-0.000161042	0.995061	9.48421e-05	25.2513
1.2	-0.000241568	0.994059	0.000116369	30.2297
1.4	-0.000322097	0.993053	0.000139725	35.1838
1.6	-0.000322104	0.992042	0.000165754	40.1137
1.8	-0.000402639	0.991026	0.000195704	45.0195
2	-0.000402647	0.990005	0.000231405	49.901
2.2	-0.000402656	0.988979	0.000275519	54.7584
2.4	-0.000483197	0.987947	0.000331872	59.5915
2.6	-0.000563742	0.98691	0.000405869	64.4005
2.8	-0.000563754	0.985866	0.000504943	69.1852
3	-0.000644304	0.984817	0.000638937	73.9458
3.2	-0.000644318	0.983762	0.000820173	78.6822
3.4	-0.000724873	0.982699	0.00106288	83.3944
3.6	-0.000724889	0.98163	0.0013816	88.0824
3.8	-0.000724905	0.980554	0.00178865	92.7463
4	-0.000805468	0.979472	0.00229119	97.3859
4.2	-0.000886034	0.978382	0.00279317	102.001
4.4	-0.000886054	0.977285	0.00338257	106.593
4.6	-0.000966626	0.97618	0.004047	111.16
4.8	-0.0010472	0.975067	0.00477196	115.703
5	-0.00104723	0.973946	0.00554326	120.222
5.2	-0.00112781	0.972816	0.00634857	124.717
5.4	-0.00112783	0.971677	0.00717805	129.187
5.6	-0.00128898	0.970528	0.00802425	133.634
5.8	-0.00120845	0.96937	0.00888177	138.056
6	-0.00128904	0.968201	0.00974677	142.454
6.2	-0.00136964	0.967022	0.0106165	146.829
6.4	-0.00145024	0.965833	0.0114893	151.179
6.6	-0.00145028	0.964633	0.0123637	155.505
6.8	-0.00153089	0.963422	0.013239	159.807
7	-0.0016115	0.962199	0.0141145	164.085
7.2	-0.00169212	0.960965	0.0149898	168.339
7.4	-0.00177274	0.959717	0.0158646	172.569
7.6	-0.00177278	0.958456	0.0167386	176.775
7.8	-0.00185341	0.95718	0.0176116	180.957
8	-0.00185346	0.955889	0.0184836	185.115
8.2	-0.00201468	0.954584	0.0193545	189.249
8.4	-0.00201474	0.953264	0.0202242	193.36
8.6	-0.00209538	0.951928	0.0210927	197.447
8.8	-0.00217603	0.950577	0.0219598	201.509
9	-0.00225669	0.949209	0.0228256	205.549
9.2	-0.00233735	0.947824	0.02369	209.564
9.4	-0.00241801	0.946423	0.024553	213.556
9.6	-0.00249869	0.945003	0.0254145	217.524
9.8	-0.00249876	0.943564	0.0262743	221.469
10	-0.00266005	0.942106	0.0271325	225.39
10.2	-0.00274074	0.940628	0.0279889	229.289
10.4	-0.00282143	0.939129	0.0288436	233.163
10.6	-0.00282152	0.93761	0.0296965	237.015
10.8	-0.00298284	0.936068	0.0305474	240.843
11	-0.00306355	0.934502	0.0313962	244.649
11.2	-0.00314427	0.932915	0.032243	248.431
11.4	-0.003225	0.931304	0.0330879	252.191
11.6	-0.00338636	0.92967	0.0339306	255.928
11.8	-0.0034671	0.928011	0.034771	259.643
12	-0.00354785	0.926327	0.0356092	263.335
12.2	-0.00370924	0.924618	0.0364451	267.006
12.4	-0.00379001	0.922883	0.0372786	270.654
12.6	-0.00395143	0.921121	0.0381097	274.281
12.8	-0.00403222	0.919332	0.0389382	277.886
13	-0.00419366	0.917515	0.039764	281.47
13.2	-0.00427447	0.915669	0.0405872	285.033
13.4	-0.00451659	0.913793	0.0414075	288.575
13.6	-0.00459742	0.911888	0.042225	292.097
13.8	-0.00475892	0.909953	0.0430396	295.6
14	-0.00492043	0.907988	0.0438512	299.082
14.2	-0.0050013	0.905992	0.0446597	302.545
14.4	-0.00516284	0.903969	0.0454656	305.99
14.6	-0.0053244	0.901919	0.0462686	309.416
14.8	-0.00556666	0.899841	0.0470688	312.824
15	-0.00572826	0.897736	0.0478662	316.216
15.2	-0.00588987	0.895608	0.0486611	319.591
15.4	-0.00613219	0.893458	0.0494535	322.951
15.6	-0.00629385	0.891286	0.0502436	326.295
15.8	-0.00645552	0.889097	0.0510315	329.625
16	-0.00669791	0.886893	0.0518175	332.942
16.2	-0.00685962	0.884676	0.0526018	336.248
16.4	-0.00710205	0.882449	0.0533846	339.54
16.6	-0.0072638	0.880212	0.0541658	342.821
16.8	-0.00750628	0.877965	0.0549456	346.089
17	-0.00766806	0.87571	0.0557239	349.346
17.2	-0.00782987	0.873446	0.0565008	352.59
17.4	-0.00807241	0.871177	0.0572764	355.822
17.6	-0.00823425	0.868903	0.0580509	359.042
17.8	-0.00847684	0.866627	0.0588245	362.251
18	-0.00863872	0.864347	0.059597	365.447
18.2	-0.0089621	0.862065	0.0603686	368.632
18.4	-0.00904328	0.859783	0.0611394	371.804
18.6	-0.00936671	0.8575	0.0619093	374.965
18.8	-0.00952867	0.855215	0.0626783	378.113
19	-0.0097714	0.852929	0.0634464	381.25
19.2	-0.00985264	0.850642	0.0642136	384.375
19.4	-0.0100954	0.848354	0.0649799	387.488
19.6	-0.010419	0.846065	0.0657453	390.589
19.8	-0.010581	0.843774	0.0665097	393.679
20	-0.0107431	0.841481	0.0672732	396.757
20.2	-0.0109052	0.839187	0.0680357	399.823
20.4	-0.0112289	0.836892	0.0687973	402.878
20.6	-0.011391	0.834596	0.0695578	405.921
20.8	-0.011634	0.832297	0.0703173	408.952
21	-0.0118769	0.829996	0.0710757	411.972
21.2	-0.0120391	0.827692	0.071833	414.98
21.4	-0.0122822	0.825387	0.0725893	417.976
21.6	-0.0124444	0.823081	0.0733445	420.961
21.8	-0.0126875	0.820775	0.0740989	423.935
22	-0.0129306	0.818468	0.0748522	426.897
22.2	-0.0131737	0.81616	0.0756046	429.848
22.4	-0.013336	0.813854	0.0763561	432.786
22.6	-0.0135792	0.811549	0.0771068	435.715
22.8	-0.0138224	0.809243	0.0778565	438.631
23	-0.0139848	0.806939	0.0786053	441.536
23.2	-0.0142281	0.804635	0.0793533	444.429
23.4	-0.0144713	0.802333	0.0801003	447.312
23.6	-0.0147147	0.80003	0.0808464	450.183
23.8	-0.014958	0.797729	0.0815916	453.043
24	-0.0151205	0.795431	0.082336	455.892
24.2	-0.0153639	0.793133	0.0830795	458.729
24.4	-0.0156073	0.790838	0.0838222	461.555
24.6	-0.0157699	0.78855	0.0845646	464.371
24.8	-0.0160942	0.786263	0.0853062	467.174
25	-0.0161759	0.78398	0.0860469	469.968
25.2	-0.0165003	0.781699	0.0867869	472.749
25.4	-0.016663	0.779422	0.0875263	475.52
25.6	-0.0169066	0.777149	0.0882649	478.28
25.8	-0.0171502	0.774879	0.0890028	481.029
26	-0.0173938	0.772613	0.08974	483.766
26.2	-0.0176374	0.77035	0.0904765	486.493
26.4	-0.0178811	0.768091	0.0912121	489.209
26.6	-0.0180439	0.765835	0.0919472	491.914
26.8	-0.0182876	0.763584	0.0926815	494.608
27	-0.0184505	0.761337	0.0934153	497.292
27.2	-0.0186942	0.759095	0.0941484	499.964
27.4	-0.018938	0.756858	0.0948809	502.626
27.6	-0.0192628	0.754625	0.0956127	505.276
27.8	-0.0194257	0.752397	0.096344	507.917
28	-0.0196696	0.750175	0.0970747	510.546
28.2	-0.0199135	0.747957	0.0978047	513.165
28.4	-0.0200765	0.745744	0.0985341	515.772
28.6	-0.0203205	0.743537	0.0992631	518.37
28.8	-0.0205645	0.741336	0.0999915	520.956
29	-0.0208085	0.739139	0.100719	523.533
29.2	-0.0210526	0.736948	0.101446	526.098
29.4	-0.0212967	0.734762	0.102173	528.653
29.6	-0.0214598	0.732581	0.102899	531.197
29.8	-0.0217039	0.730407	0.103625	533.732
30	-0.0219481	0.728238	0.10435	536.255
30.2	-0.0221923	0.726073	0.105074	538.768
30.4	-0.0224365	0.723912	0.105797	541.27
30.6	-0.0225997	0.721761	0.106521	543.763
30.8	-0.022844	0.719616	0.107244	546.244
31	-0.0230883	0.717476	0.107966	548.716
31.2	-0.0233326	0.71534	0.108688	551.177
31.4	-0.023577	0.71321	0.109409	553.628
31.6	-0.0238213	0.711082	0.110129	556.068
31.8	-0.0240657	0.708959	0.110849	558.499
32	-0.0242292	0.70684	0.111568	560.919
32.2	-0.0244736	0.704726	0.112286	563.329
32.4	-0.0247181	0.702617	0.113003	565.728
32.6	-0.0249626	0.700512	0.11372	568.119
32.8	-0.0252072	0.698412	0.114436	570.497
33	-0.0254518	0.696314	0.115151	572.867
33.2	-0.0256153	0.69422	0.115865	575.226
33.4	-0.025941	0.692131	0.116579	577.576
33.6	-0.0261046	0.690044	0.117292	579.914
33.8	-0.0263493	0.687963	0.118004	582.244
34	-0.0265941	0.685886	0.118715	584.563
34.2	-0.0268388	0.683814	0.119425	586.873
34.4	-0.0270836	0.681746	0.120135	589.171
34.6	-0.0272473	0.679681	0.120844	591.462
34.8	-0.0275733	0.677618	0.121552	593.74
35	-0.0278182	0.675559	0.122258	596.011
35.2	-0.027982	0.673503	0.122964	598.27
35.4	-0.0282269	0.67145	0.123669	600.521
35.6	-0.028553	0.6694	0.124373	602.761
35.8	-0.0287169	0.667353	0.125076	604.992
36	-0.028962	0.665308	0.125778	607.212
36.2	-0.029207	0.663267	0.126478	609.424
36.4	-0.0295333	0.661227	0.127178	611.625
36.6	-0.0296973	0.659191	0.127876	613.818
36.8	-0.0299425	0.657158	0.128574	615.999
37	-0.0301877	0.655129	0.12927	618.173
37.2	-0.0304329	0.653104	0.129966	620.335
37.4	-0.0306782	0.651086	0.130661	622.489
37.6	-0.0309235	0.649073	0.131355	624.633
37.8	-0.0311689	0.647064	0.132048	626.768
38	-0.0314143	0.645057	0.13274	628.892
38.2	-0.0316597	0.643055	0.133431	631.009
38.4	-0.0319051	0.64106	0.134121	633.114
38.6	-0.0321506	0.63907	0.134811	635.212
38.8	-0.0323961	0.637085	0.135499	637.299
39	-0.0326417	0.635105	0.136187	639.378
39.2	-0.0328872	0.63313	0.136874	641.446
39.4	-0.0331329	0.63116	0.13756	643.506
39.6	-0.0333785	0.629197	0.138245	645.555
39.8	-0.0336242	0.627241	0.138929	647.598
40	-0.0338699	0.625293	0.139613	649.628
40.2	-0.0341157	0.623355	0.140297	651.653
40.4	-0.0343614	0.621426	0.140981	653.665
40.6	-0.0346072	0.619502	0.141663	655.671
40.8	-0.0348531	0.617587	0.142346	657.665
41	-0.035099	0.615681	0.143028	659.652
41.2	-0.0354261	0.613783	0.143709	661.628
41.4	-0.0356721	0.611893	0.14439	663.598
41.6	-0.035918	0.61001	0.145071	665.555
41.8	-0.036164	0.608133	0.145751	667.507
42	-0.0363288	0.606265	0.14643	669.447
42.2	-0.0365749	0.604405	0.147109	671.381
42.4	-0.0369023	0.602551	0.147788	673.302
42.6	-0.0371484	0.600703	0.148465	675.219
42.8	-0.0373946	0.598864	0.149143	677.123
43	-0.0376408	0.597037	0.14982	679.021
43.2	-0.037887	0.595218	0.150498	680.908
43.4	-0.038052	0.593406	0.151175	682.789
43.6	-0.0383796	0.5916	0.151851	684.658
43.8	-0.038626	0.5898	0.152527	686.522
44	-0.0388723	0.588009	0.153202	688.373
44.2	-0.0391187	0.586226	0.153878	690.22
44.4	-0.0394465	0.584451	0.154553	692.054
44.6	-0.0396117	0.582683	0.155227	693.883
44.8	-0.0398582	0.580922	0.155902	695.7
45	-0.0401047	0.57917	0.156576	697.512
45.2	-0.0403513	0.577426	0.15725	699.311
45.4	-0.0406792	0.575691	0.157924	701.107
45.6	-0.0408445	0.573965	0.158599	702.889
45.8	-0.0410912	0.572243	0.159272	704.668
46	-0.0414193	0.570526	0.159946	706.433
46.2	-0.0415847	0.568813	0.160618	708.195
46.4	-0.0418314	0.567105	0.16129	709.944
46.6	-0.0420783	0.565401	0.161962	711.689
46.8	-0.0424065	0.563703	0.162633	713.421
47	-0.0426534	0.562007	0.163303	715.15
47.2	-0.042819	0.560316	0.163973	716.865
47.4	-0.043066	0.558628	0.164642	718.578
47.6	-0.0433944	0.556946	0.165311	720.276
47.8	-0.0436415	0.555265	0.165979	721.973
48	-0.0438886	0.553585	0.166646	723.655
48.2	-0.0441357	0.551908	0.167312	725.335
48.4	-0.0444644	0.550239	0.167979	727
48.6	-0.0446302	0.548576	0.168646	728.664
48.8	-0.0448774	0.546916	0.169313	730.314
49	-0.0451248	0.54526	0.169979	731.962
49.2	-0.0453721	0.543605	0.170645	733.595
49.4	-0.0456195	0.541949	0.17131	735.228
49.6	-0.0459484	0.540292	0.171974	736.845
49.8	-0.0461959	0.538634	0.172637	738.462
50	-0.0464435	0.536976	0.173299	740.063
50.2	-0.0466911	0.535314	0.17396	741.664
50.4	-0.0469388	0.533654	0.174621	743.25
50.6	-0.0471865	0.531992	0.175281	744.836
50.8	-0.0475158	0.530324	0.17594	746.406
51	-0.0476821	0.528653	0.176597	747.976
51.2	-0.0480115	0.526976	0.177253	749.53
51.4	-0.0482595	0.525289	0.177907	751.086
51.6	-0.0485075	0.523594	0.17856	752.624
51.8	-0.0487556	0.52192	0.179216	754.165
52	-0.0490852	0.520237	0.179871	755.688
52.2	-0.0493334	0.518541	0.180523	757.213
52.4	-0.0496632	0.516828	0.181173	758.721
52.6	-0.0499116	0.515098	0.181819	760.231
52.8	-0.0502416	0.513354	0.182463	761.723
53	-0.0504087	0.511592	0.183105	763.22
53.2	-0.0508205	0.509807	0.183742	764.696
53.4	-0.0510692	0.508005	0.184377	766.178
53.6	-0.0513181	0.506181	0.185008	767.64
53.8	-0.0516487	0.504335	0.185635	769.108
54	-0.0519794	0.502461	0.186259	770.555
54.2	-0.0522287	0.500558	0.186877	772.008
54.4	-0.0526413	0.498628	0.187491	773.44
54.6	-0.0528909	0.496663	0.188099	774.88
54.8	-0.0532222	0.494663	0.188702	776.297
55	-0.0535537	0.492628	0.189299	777.723
55.2	-0.0538855	0.490551	0.189889	779.125
55.4	-0.0542174	0.488436	0.190473	780.537
55.6	-0.0545495	0.486271	0.191048	781.925
55.8	-0.0549635	0.484071	0.191618	783.323
56	-0.0552961	0.481827	0.19218	784.696
56.2	-0.0557105	0.479545	0.192736	786.081
56.4	-0.0560435	0.477224	0.193287	787.44
56.6	-0.0564584	0.474879	0.193834	788.811
56.8	-0.0568736	0.472498	0.194376	790.155
57	-0.0572889	0.47009	0.194915	791.514
57.2	-0.0577045	0.467655	0.195452	792.843
57.4	-0.0581203	0.465197	0.195987	794.189
57.6	-0.0585363	0.462713	0.196521	795.504
57.8	-0.0588708	0.460208	0.197055	796.837
58	-0.059369	0.457666	0.197587	798.139
58.2	-0.0598675	0.455094	0.19812	799.459
58.4	-0.0602846	0.452475	0.198651	800.747
58.6	-0.060702	0.449778	0.199176	802.055
58.8	-0.0611198	0.447012	0.199697	803.328
59	-0.061538	0.444169	0.200215	804.624
59.2	-0.0620385	0.441232	0.200727	805.884
59.4	-0.0625395	0.438188	0.201234	807.168
59.6	-0.0630411	0.435025	0.201736	808.414
59.8	-0.0635435	0.431717	0.202229	809.686
60	-0.0641284	0.42824	0.202714	810.918
60.2	-0.0646324	0.424569	0.203188	812.179
60.4	-0.0653013	0.420687	0.203654	813.397
60.6	-0.0658894	0.41655	0.204108	814.646
60.8	-0.0664788	0.412121	0.20455	815.85
61	-0.0672337	0.407359	0.204982	817.088
61.2	-0.0679086	0.402171	0.205396	818.279
61.4	-0.06875	0.396467	0.205792	819.506
61.6	-0.0695943	0.39015	0.206167	820.683
61.8	-0.0705243	0.383073	0.206517	821.9
62	-0.0716231	0.375084	0.206839	823.062
62.2	-0.0728097	0.366025	0.207135	824.269
62.4	-0.074168	0.355616	0.207398	825.418
62.6	-0.0757004	0.343564	0.207622	826.615
62.8	-0.0774091	0.329687	0.207808	827.75
63	-0.0794617	0.313859	0.207953	828.938
63.2	-0.0816958	0.296211	0.208056	830.059
63.4	-0.0841111	0.277468	0.208125	831.237
63.6	-0.0865397	0.258574	0.208176	832.346
63.8	-0.0891453	0.240137	0.208211	833.515
64	-0.0916767	0.222713	0.208251	834.609
64.2	-0.0940527	0.206113	0.208287	835.77
64.4	-0.0965221	0.190498	0.208315	836.85
64.6	-0.0988321	0.176313	0.208328	838.003
64.8	-0.100892	0.163917	0.208348	839.069
65	-0.102704	0.152751	0.20838	840.214
65.2	-0.104189	0.14214	0.208415	841.266
65.4	-0.10561	0.131163	0.208501	842.403
65.6	-0.106825	0.118775	0.208491	843.442
65.8	-0.107704	0.107621	0.208535	844.571
66	-0.108296	0.0952697	0.20855	845.595
66.2	-0.108909	0.0835279	0.208551	846.719
66.4	-0.109439	0.0732197	0.208553	847.728
66.6	-0.110056	0.0641879	0.208554	848.845
66.8	-0.110675	0.0562983	0.208555	849.84
67	-0.111379	0.0494041	0.208555	850.952
67.2	-0.111999	0.0433784	0.208556	851.931
67.4	-0.112791	0.0381081	0.208557	853.038
67.6	-0.11367	0.0334956	0.208558	854.003
67.8	-0.11455	0.0294589	0.208558	855.106
68	-0.115689	0.0259306	0.20856	856.054
68.2	-0.116742	0.0228587	0.208559	857.154
68.4	-0.11814	0.0202042	0.208562	858.087
68.6	-0.119536	0.0179339	0.208561	859.184
68.8	-0.121016	0.0159989	0.208566	860.1
69	-0.122495	0.0143348	0.208566	861.195
69.2	-0.123798	0.0129043	0.208576	862.095
69.4	-0.124846	0.011613	0.20858	863.189
69.6	-0.125811	0.0104551	0.208588	864.072
69.8	-0.126526	0.00937807	0.208594	865.166
70	-0.127079	0.00837271	0.208599	866.03
70.2	-0.12764	0.00746012	0.208599	867.125
70.4	-0.128112	0.00665567	0.208601	867.971
70.6	-0.128587	0.00593607	0.208602	869.068
70.8	-0.129063	0.00529478	0.208604	869.894
71	-0.129627	0.00472996	0.208603	870.995
71.2	-0.130368	0.00423832	0.208606	871.8
71.4	-0.131104	0.00381585	0.208605	872.906
71.6	-0.131747	0.00344729	0.20861	873.689
71.8	-0.132393	0.00311824	0.208609	874.801
72	-0.132775	0.00281659	0.208617	875.562
72.2	-0.133076	0.00253791	0.208613	876.681
72.4	-0.133376	0.00228812	0.20862	877.417
72.6	-0.133676	0.00206456	0.208613	878.547
72.8	-0.134066	0.00186448	0.208623	879.257
73	-0.134365	0.00168535	0.208613	880.398
73.2	-0.134662	0.0015248	0.208627	881.081
73.4	-0.135051	0.0013808	0.208612	882.236
73.6	-0.135439	0.0012516	0.208632	882.889
73.8	-0.135826	0.00113558	0.20861	884.061
74	-0.136213	0.0010314	0.208639	884.682
74.2	-0.136691	0.000937852	0.208606	885.873
74.4	-0.137169	0.00085406	0.208648	886.461
74.6	-0.137646	0.000778735	0.2086	887.673
74.8	-0.138309	0.000711168	0.20866	888.224
75	-0.138876	0.000650974	0.208591	889.462
75.2	-0.139629	0.000597628	0.208678	889.974
75.4	-0.140288	0.000549653	0.208579	891.24
75.6	-0.140946	0.000506941	0.208701	891.71
75.8	-0.141513	0.000467974	0.208562	893.009
76	-0.142178	0.000432001	0.208732	893.432
76.2	-0.142844	0.000399527	0.208537	894.768
76.4	-0.1436	0.000370566	0.20877	895.14
76.6	-0.144362	0.000343581	0.208503	896.518
76.8	-0.145123	0.000319345	0.208819	896.835
77	-0.146069	0.000297943	0.208455	898.26
77.2	-0.147305	0.000278508	0.208887	898.517
77.4	-0.149202	0.000262891	0.208391	899.996
77.6	-0.151244	0.000253989	0.208974	900.187
77.8	-0.153371	0.000250146	0.208325	901.726
78	-0.151726	0.00024788	0.209081	901.845
78.2	-0.154982	0.00022839	0.208277	903.453
78.4	-0.152654	0.000254342	0.209138	903.495
78.6	-0.155858	0.000223547	0.20823	905.184
