# Supplementary material for: Gas transport in firn: multiple-tracer characterisation and model intercomparison for NEEM, Northern Greenland
Source: Copernicus journal article supplement (doi:10.5194/acp-12-4259-2012), 2012-05-14
Supplement: Supplementary file 9 [file NEEM08_EU_OSU.xls]

## Sheet: Diffusivity
depth	Molec_diff	Eddy_diff
0	1.95405e-05	2.99795e-05
0.0925177	1.95405e-05	2.9294e-05
0.185035	1.95405e-05	2.86242e-05
0.277553	1.95405e-05	2.79698e-05
0.370071	1.95405e-05	2.73303e-05
0.462588	1.95405e-05	2.67054e-05
0.555106	1.95405e-05	2.60948e-05
0.647624	1.95405e-05	2.54982e-05
0.740142	1.95405e-05	2.49152e-05
0.832659	1.95405e-05	2.43455e-05
0.925177	1.95405e-05	2.37889e-05
1.01769	1.95405e-05	2.3245e-05
1.11021	1.95405e-05	2.27135e-05
1.20273	1.95405e-05	2.21942e-05
1.29525	1.95405e-05	2.16867e-05
1.38777	1.95405e-05	2.11909e-05
1.48028	1.95405e-05	2.07064e-05
1.5728	1.95405e-05	2.0233e-05
1.66532	1.95405e-05	1.97703e-05
1.75784	1.94755e-05	1.93183e-05
1.85035	1.94106e-05	1.88766e-05
1.94287	1.93457e-05	1.8445e-05
2.03539	1.92809e-05	1.80233e-05
2.12791	1.92161e-05	1.76112e-05
2.22042	1.91513e-05	1.72086e-05
2.31294	1.90867e-05	1.68151e-05
2.40546	1.9022e-05	1.64306e-05
2.49798	1.89574e-05	1.6055e-05
2.5905	1.88929e-05	1.56879e-05
2.68301	1.88284e-05	1.53292e-05
2.77553	1.87639e-05	1.49787e-05
2.86805	1.86995e-05	1.46362e-05
2.96057	1.86351e-05	1.43016e-05
3.05308	1.85708e-05	1.39746e-05
3.1456	1.85066e-05	1.36551e-05
3.23812	1.84423e-05	1.33429e-05
3.33064	1.83782e-05	1.30378e-05
3.42315	1.83141e-05	1.27397e-05
3.51567	1.825e-05	1.24484e-05
3.60819	1.8186e-05	1.21638e-05
3.70071	1.8122e-05	1.18857e-05
3.79323	1.80581e-05	1.16139e-05
3.88574	1.79942e-05	1.13484e-05
3.97826	1.79304e-05	1.10889e-05
4.07078	1.78666e-05	1.08354e-05
4.1633	1.78029e-05	1.05877e-05
4.25581	1.77393e-05	1.03456e-05
4.34833	1.76756e-05	1.0109e-05
4.44085	1.76121e-05	9.8779e-06
4.53337	1.75486e-05	9.65206e-06
4.62588	1.74851e-05	9.43137e-06
4.7184	1.74217e-05	9.21573e-06
4.81092	1.73584e-05	9.00502e-06
4.90344	1.72951e-05	8.79913e-06
4.99596	1.72318e-05	8.59795e-06
5.08847	1.71687e-05	8.40137e-06
5.18099	1.71055e-05	8.20928e-06
5.27351	1.70425e-05	8.02158e-06
5.36603	1.69794e-05	7.83818e-06
5.45854	1.69165e-05	7.65896e-06
5.55106	1.68536e-05	7.48385e-06
5.64358	1.67907e-05	7.31274e-06
5.7361	1.67279e-05	7.14554e-06
5.82861	1.66652e-05	6.98216e-06
5.92113	1.66025e-05	6.82252e-06
6.01365	1.65399e-05	6.66653e-06
6.10617	1.64774e-05	6.51411e-06
6.19869	1.64149e-05	6.36517e-06
6.2912	1.63524e-05	6.21964e-06
6.38372	1.62901e-05	6.07743e-06
6.47624	1.62278e-05	5.93848e-06
6.56876	1.61655e-05	5.8027e-06
6.66127	1.61034e-05	5.67003e-06
6.75379	1.60412e-05	5.54039e-06
6.84631	1.59792e-05	5.41371e-06
6.93883	1.59172e-05	5.28993e-06
7.03135	1.58553e-05	5.16899e-06
7.12386	1.57935e-05	5.0508e-06
7.21638	1.57317e-05	4.93532e-06
7.3089	1.567e-05	4.82248e-06
7.40142	1.56084e-05	4.71222e-06
7.49393	1.55468e-05	4.60448e-06
7.58645	1.54854e-05	4.4992e-06
7.67897	1.54239e-05	4.39633e-06
7.77149	1.53626e-05	4.29581e-06
7.864	1.53014e-05	4.19759e-06
7.95652	1.52402e-05	4.10162e-06
8.04904	1.51791e-05	4.00784e-06
8.14156	1.51181e-05	3.91621e-06
8.23408	1.50572e-05	3.82667e-06
8.32659	1.49964e-05	3.73917e-06
8.41911	1.49356e-05	3.65368e-06
8.51163	1.4875e-05	3.57014e-06
8.60415	1.48144e-05	3.48852e-06
8.69666	1.47539e-05	3.40875e-06
8.78918	1.46935e-05	3.33082e-06
8.8817	1.46333e-05	3.25466e-06
8.97422	1.45731e-05	3.18025e-06
9.06673	1.4513e-05	3.10753e-06
9.15925	1.4453e-05	3.03648e-06
9.25177	1.43932e-05	2.96706e-06
9.34429	1.43334e-05	2.89922e-06
9.43681	1.42737e-05	2.83293e-06
9.52932	1.42142e-05	2.76816e-06
9.62184	1.41548e-05	2.70487e-06
9.71436	1.40955e-05	2.64302e-06
9.80688	1.40363e-05	2.58259e-06
9.89939	1.39772e-05	2.52354e-06
9.99191	1.39183e-05	2.46585e-06
10.0844	1.38595e-05	2.40947e-06
10.1769	1.38008e-05	2.35438e-06
10.2695	1.37423e-05	2.30055e-06
10.362	1.36839e-05	2.24795e-06
10.4545	1.36257e-05	2.19655e-06
10.547	1.35676e-05	2.14633e-06
10.6395	1.35097e-05	2.09725e-06
10.7321	1.34519e-05	2.0493e-06
10.8246	1.33943e-05	2.00245e-06
10.9171	1.33369e-05	1.95666e-06
11.0096	1.32796e-05	1.91193e-06
11.1021	1.32226e-05	1.86821e-06
11.1946	1.31657e-05	1.8255e-06
11.2872	1.3109e-05	1.78376e-06
11.3797	1.30525e-05	1.74298e-06
11.4722	1.29961e-05	1.70312e-06
11.5647	1.294e-05	1.66418e-06
11.6572	1.28842e-05	1.62613e-06
11.7497	1.28285e-05	1.58895e-06
11.8423	1.27731e-05	1.55262e-06
11.9348	1.27179e-05	1.51712e-06
12.0273	1.26629e-05	1.48244e-06
12.1198	1.26082e-05	1.44854e-06
12.2123	1.25538e-05	1.41542e-06
12.3049	1.24996e-05	1.38306e-06
12.3974	1.24457e-05	1.35144e-06
12.4899	1.23921e-05	1.32054e-06
12.5824	1.23388e-05	1.29035e-06
12.6749	1.22858e-05	1.26084e-06
12.7674	1.22331e-05	1.23202e-06
12.86	1.21808e-05	1.20385e-06
12.9525	1.21287e-05	1.17632e-06
13.045	1.20771e-05	1.14943e-06
13.1375	1.20258e-05	1.12315e-06
13.23	1.19748e-05	1.09747e-06
13.3225	1.19243e-05	1.07237e-06
13.4151	1.18742e-05	1.04786e-06
13.5076	1.18245e-05	1.0239e-06
13.6001	1.17752e-05	1.00049e-06
13.6926	1.17264e-05	9.77612e-07
13.7851	1.1678e-05	9.5526e-07
13.8777	1.16301e-05	9.33419e-07
13.9702	1.15828e-05	9.12077e-07
14.0627	1.15359e-05	8.91224e-07
14.1552	1.14896e-05	8.70847e-07
14.2477	1.14438e-05	8.50936e-07
14.3402	1.13986e-05	8.3148e-07
14.4328	1.1354e-05	8.12469e-07
14.5253	1.131e-05	7.93893e-07
14.6178	1.12667e-05	7.75741e-07
14.7103	1.12241e-05	7.58005e-07
14.8028	1.11821e-05	7.40674e-07
14.8953	1.11409e-05	7.23739e-07
14.9879	1.11004e-05	7.07191e-07
15.0804	1.10606e-05	6.91022e-07
15.1729	1.10217e-05	6.75223e-07
15.2654	1.09837e-05	6.59784e-07
15.3579	1.09464e-05	6.44699e-07
15.4505	1.09101e-05	6.29959e-07
15.543	1.08748e-05	6.15555e-07
15.6355	1.08404e-05	6.01481e-07
15.728	1.0807e-05	5.87729e-07
15.8205	1.07746e-05	5.74291e-07
15.913	1.07434e-05	5.6116e-07
16.0056	1.07132e-05	5.4833e-07
16.0981	1.06837e-05	5.35793e-07
16.1906	1.06541e-05	5.23543e-07
16.2831	1.06246e-05	5.11572e-07
16.3756	1.05951e-05	4.99876e-07
16.4682	1.05657e-05	4.88447e-07
16.5607	1.05363e-05	4.77279e-07
16.6532	1.05069e-05	4.66366e-07
16.7457	1.04776e-05	4.55703e-07
16.8382	1.04483e-05	4.45284e-07
16.9307	1.04191e-05	4.35103e-07
17.0233	1.03899e-05	4.25155e-07
17.1158	1.03607e-05	4.15434e-07
17.2083	1.03316e-05	4.05936e-07
17.3008	1.03025e-05	3.96654e-07
17.3933	1.02735e-05	3.87585e-07
17.4858	1.02445e-05	3.78724e-07
17.5784	1.02155e-05	3.70064e-07
17.6709	1.01866e-05	3.61603e-07
17.7634	1.01577e-05	3.53336e-07
17.8559	1.01289e-05	3.45257e-07
17.9484	1.01e-05	3.37363e-07
18.041	1.00713e-05	3.2965e-07
18.1335	1.00425e-05	3.22112e-07
18.226	1.00138e-05	3.14748e-07
18.3185	9.98519e-06	3.07551e-07
18.411	9.95658e-06	3.00519e-07
18.5035	9.928e-06	2.93648e-07
18.5961	9.89946e-06	2.86934e-07
18.6886	9.87096e-06	2.80374e-07
18.7811	9.84249e-06	2.73963e-07
18.8736	9.81407e-06	2.677e-07
18.9661	9.78569e-06	2.61579e-07
19.0586	9.75734e-06	2.55598e-07
19.1512	9.72903e-06	2.49754e-07
19.2437	9.70076e-06	2.44044e-07
19.3362	9.67253e-06	2.38464e-07
19.4287	9.64433e-06	2.33012e-07
19.5212	9.61618e-06	2.27684e-07
19.6138	9.58806e-06	2.22478e-07
19.7063	9.55998e-06	2.17392e-07
19.7988	9.53194e-06	2.12421e-07
19.8913	9.50394e-06	2.07564e-07
19.9838	9.47597e-06	2.02819e-07
20.0763	9.44805e-06	1.98181e-07
20.1689	9.42016e-06	1.9365e-07
20.2614	9.39231e-06	1.89223e-07
20.3539	9.36449e-06	1.84896e-07
20.4464	9.33672e-06	1.80669e-07
20.5389	9.30898e-06	1.76538e-07
20.6314	9.28128e-06	1.72502e-07
20.724	9.25362e-06	1.68557e-07
20.8165	9.226e-06	1.64704e-07
20.909	9.19842e-06	1.60938e-07
21.0015	9.17087e-06	1.57258e-07
21.094	9.14336e-06	1.53663e-07
21.1866	9.11589e-06	1.50149e-07
21.2791	9.08845e-06	1.46716e-07
21.3716	9.06105e-06	1.43362e-07
21.4641	9.03369e-06	1.40084e-07
21.5566	9.00637e-06	1.36881e-07
21.6491	8.97909e-06	1.33751e-07
21.7417	8.95184e-06	1.30693e-07
21.8342	8.92463e-06	1.27705e-07
21.9267	8.89746e-06	1.24785e-07
22.0192	8.87033e-06	1.21932e-07
22.1117	8.84323e-06	1.19144e-07
22.2042	8.81617e-06	1.1642e-07
22.2968	8.78915e-06	1.13758e-07
22.3893	8.76216e-06	1.11157e-07
22.4818	8.73522e-06	1.08616e-07
22.5743	8.70831e-06	1.06133e-07
22.6668	8.68143e-06	1.03706e-07
22.7594	8.6546e-06	1.01335e-07
22.8519	8.6278e-06	9.90178e-08
22.9444	8.60104e-06	9.67539e-08
23.0369	8.57431e-06	9.45417e-08
23.1294	8.54762e-06	9.23801e-08
23.2219	8.52097e-06	9.02679e-08
23.3145	8.49436e-06	8.82041e-08
23.407	8.46778e-06	8.61874e-08
23.4995	8.44124e-06	8.42168e-08
23.592	8.41474e-06	8.22912e-08
23.6845	8.38827e-06	8.04097e-08
23.777	8.36184e-06	7.85713e-08
23.8696	8.33545e-06	7.67748e-08
23.9621	8.3091e-06	7.50194e-08
24.0546	8.28278e-06	7.33042e-08
24.1471	8.2565e-06	7.16282e-08
24.2396	8.23025e-06	6.99904e-08
24.3322	8.20404e-06	6.83902e-08
24.4247	8.17787e-06	6.68265e-08
24.5172	8.15174e-06	6.52986e-08
24.6097	8.12564e-06	6.38056e-08
24.7022	8.09957e-06	6.23468e-08
24.7947	8.07355e-06	6.09213e-08
24.8873	8.04756e-06	5.95284e-08
24.9798	8.02161e-06	5.81673e-08
25.0723	7.99569e-06	5.68374e-08
25.1648	7.96981e-06	5.55378e-08
25.2573	7.94397e-06	5.4268e-08
25.3498	7.91816e-06	5.30272e-08
25.4424	7.89239e-06	5.18148e-08
25.5349	7.86665e-06	5.06301e-08
25.6274	7.84096e-06	4.94725e-08
25.7199	7.81529e-06	4.83414e-08
25.8124	7.78967e-06	4.72361e-08
25.905	7.76408e-06	4.61561e-08
25.9975	7.73852e-06	4.51008e-08
26.09	7.71301e-06	4.40696e-08
26.1825	7.68752e-06	4.3062e-08
26.275	7.66208e-06	4.20774e-08
26.3675	7.63667e-06	4.11154e-08
26.4601	7.6113e-06	4.01753e-08
26.5526	7.58596e-06	3.92567e-08
26.6451	7.56066e-06	3.83592e-08
26.7376	7.53539e-06	3.74821e-08
26.8301	7.51016e-06	3.66251e-08
26.9227	7.48497e-06	3.57877e-08
27.0152	7.45981e-06	3.49695e-08
27.1077	7.43469e-06	3.41699e-08
27.2002	7.4096e-06	3.33887e-08
27.2927	7.38455e-06	3.26253e-08
27.3852	7.35953e-06	3.18793e-08
27.4778	7.33455e-06	3.11505e-08
27.5703	7.30961e-06	3.04382e-08
27.6628	7.2847e-06	2.97423e-08
27.7553	7.25983e-06	2.90623e-08
27.8478	7.23499e-06	2.83978e-08
27.9403	7.21019e-06	2.77485e-08
28.0329	7.18542e-06	2.71141e-08
28.1254	7.16069e-06	2.64941e-08
28.2179	7.136e-06	2.58884e-08
28.3104	7.11134e-06	2.52964e-08
28.4029	7.08671e-06	2.47181e-08
28.4955	7.06212e-06	2.41529e-08
28.588	7.03757e-06	2.36007e-08
28.6805	7.01305e-06	2.30611e-08
28.773	6.98857e-06	2.25338e-08
28.8655	6.96412e-06	2.20186e-08
28.958	6.9397e-06	2.15152e-08
29.0506	6.91533e-06	2.10232e-08
29.1431	6.89098e-06	2.05426e-08
29.2356	6.86668e-06	2.00729e-08
29.3281	6.8424e-06	1.96139e-08
29.4206	6.81817e-06	1.91655e-08
29.5131	6.79396e-06	1.87273e-08
29.6057	6.7698e-06	1.82991e-08
29.6982	6.74566e-06	1.78807e-08
29.7907	6.72157e-06	1.74719e-08
29.8832	6.6975e-06	1.70724e-08
29.9757	6.67347e-06	1.66821e-08
30.0683	6.64948e-06	1.63007e-08
30.1608	6.62552e-06	1.5928e-08
30.2533	6.6016e-06	1.55638e-08
30.3458	6.57771e-06	1.52079e-08
30.4383	6.55386e-06	1.48602e-08
30.5308	6.53004e-06	1.45204e-08
30.6234	6.50625e-06	1.41885e-08
30.7159	6.4825e-06	1.3864e-08
30.8084	6.45879e-06	1.35471e-08
30.9009	6.43511e-06	1.32373e-08
30.9934	6.41146e-06	1.29347e-08
31.0859	6.38785e-06	1.26389e-08
31.1785	6.36427e-06	1.23499e-08
31.271	6.34073e-06	1.20676e-08
31.3635	6.31722e-06	1.17917e-08
31.456	6.29375e-06	1.15221e-08
31.5485	6.27031e-06	1.12586e-08
31.6411	6.2469e-06	1.10012e-08
31.7336	6.22353e-06	1.07497e-08
31.8261	6.20019e-06	1.05039e-08
31.9186	6.17689e-06	1.02637e-08
32.0111	6.15362e-06	1.00291e-08
32.1036	6.13039e-06	9.79976e-09
32.1962	6.10719e-06	9.5757e-09
32.2887	6.08402e-06	9.35676e-09
32.3812	6.06089e-06	9.14282e-09
32.4737	6.03779e-06	8.93378e-09
32.5662	6.01473e-06	8.72952e-09
32.6587	5.9917e-06	8.52993e-09
32.7513	5.96871e-06	8.3349e-09
32.8438	5.94574e-06	8.14433e-09
32.9363	5.92282e-06	7.95812e-09
33.0288	5.89992e-06	7.77617e-09
33.1213	5.87706e-06	7.59837e-09
33.2139	5.85424e-06	7.42464e-09
33.3064	5.83144e-06	7.25489e-09
33.3989	5.80869e-06	7.08901e-09
33.4914	5.78596e-06	6.92693e-09
33.5839	5.76327e-06	6.76855e-09
33.6764	5.74061e-06	6.61379e-09
33.769	5.71799e-06	6.46258e-09
33.8615	5.6954e-06	6.31482e-09
33.954	5.67284e-06	6.17043e-09
34.0465	5.65032e-06	6.02935e-09
34.139	5.62783e-06	5.8915e-09
34.2315	5.60538e-06	5.75679e-09
34.3241	5.58296e-06	5.62517e-09
34.4166	5.56057e-06	5.49656e-09
34.5091	5.53821e-06	5.37088e-09
34.6016	5.51589e-06	5.24808e-09
34.6941	5.4936e-06	5.12809e-09
34.7867	5.47135e-06	5.01084e-09
34.8792	5.44912e-06	4.89628e-09
34.9717	5.42694e-06	4.78433e-09
35.0642	5.40478e-06	4.67494e-09
35.1567	5.38266e-06	4.56805e-09
35.2492	5.36057e-06	4.46361e-09
35.3418	5.33851e-06	4.36155e-09
35.4343	5.31649e-06	4.26183e-09
35.5268	5.2945e-06	4.16439e-09
35.6193	5.27255e-06	4.06917e-09
35.7118	5.25062e-06	3.97613e-09
35.8043	5.22873e-06	3.88522e-09
35.8969	5.20688e-06	3.79639e-09
35.9894	5.18505e-06	3.70959e-09
36.0819	5.16326e-06	3.62478e-09
36.1744	5.1415e-06	3.5419e-09
36.2669	5.11978e-06	3.46092e-09
36.3595	5.09808e-06	3.38179e-09
36.452	5.07642e-06	3.30447e-09
36.5445	5.0548e-06	3.22891e-09
36.637	5.0332e-06	3.15509e-09
36.7295	5.01164e-06	3.08295e-09
36.822	4.99011e-06	3.01246e-09
36.9146	4.96861e-06	2.94358e-09
37.0071	4.94715e-06	2.87628e-09
37.0996	4.92572e-06	2.81052e-09
37.1921	4.90432e-06	2.74626e-09
37.2846	4.88296e-06	2.68347e-09
37.3772	4.86162e-06	2.62211e-09
37.4697	4.84032e-06	2.56216e-09
37.5622	4.81905e-06	2.50358e-09
37.6547	4.79782e-06	2.44634e-09
37.7472	4.77661e-06	2.3904e-09
37.8397	4.75544e-06	2.33575e-09
37.9323	4.7343e-06	2.28235e-09
38.0248	4.71319e-06	2.23016e-09
38.1173	4.69212e-06	2.17917e-09
38.2098	4.67108e-06	2.12935e-09
38.3023	4.65007e-06	2.08066e-09
38.3948	4.62909e-06	2.03309e-09
38.4874	4.60814e-06	1.98661e-09
38.5799	4.58723e-06	1.94118e-09
38.6724	4.56635e-06	1.8968e-09
38.7649	4.5455e-06	1.85343e-09
38.8574	4.52468e-06	1.81106e-09
38.95	4.50389e-06	1.76965e-09
39.0425	4.48314e-06	1.72919e-09
39.135	4.46242e-06	1.68965e-09
39.2275	4.44173e-06	1.65102e-09
39.32	4.42107e-06	1.61327e-09
39.4125	4.40044e-06	1.57638e-09
39.5051	4.37985e-06	1.54034e-09
39.5976	4.35928e-06	1.50512e-09
39.6901	4.33875e-06	1.47071e-09
39.7826	4.31825e-06	1.43708e-09
39.8751	4.29778e-06	1.40423e-09
39.9676	4.27735e-06	1.37212e-09
40.0602	4.25694e-06	1.34075e-09
40.1527	4.23657e-06	1.31009e-09
40.2452	4.21623e-06	1.28014e-09
40.3377	4.19592e-06	1.25087e-09
40.4302	4.17564e-06	1.22227e-09
40.5228	4.15539e-06	1.19432e-09
40.6153	4.13517e-06	1.16702e-09
40.7078	4.11499e-06	1.14033e-09
40.8003	4.09483e-06	1.11426e-09
40.8928	4.07471e-06	1.08878e-09
40.9853	4.05462e-06	1.06389e-09
41.0779	4.03456e-06	1.03957e-09
41.1704	4.01453e-06	1.0158e-09
41.2629	3.99453e-06	9.92572e-10
41.3554	3.97457e-06	9.69878e-10
41.4479	3.95463e-06	9.47703e-10
41.5404	3.93473e-06	9.26035e-10
41.633	3.91485e-06	9.04862e-10
41.7255	3.89501e-06	8.84173e-10
41.818	3.8752e-06	8.63957e-10
41.9105	3.85542e-06	8.44204e-10
42.003	3.83566e-06	8.24902e-10
42.0956	3.81595e-06	8.06041e-10
42.1881	3.79626e-06	7.87612e-10
42.2806	3.7766e-06	7.69604e-10
42.3731	3.75697e-06	7.52008e-10
42.4656	3.73737e-06	7.34814e-10
42.5581	3.71781e-06	7.18013e-10
42.6507	3.69827e-06	7.01596e-10
42.7432	3.67877e-06	6.85555e-10
42.8357	3.65929e-06	6.69881e-10
42.9282	3.63985e-06	6.54565e-10
43.0207	3.62043e-06	6.39599e-10
43.1132	3.60105e-06	6.24975e-10
43.2058	3.5817e-06	6.10686e-10
43.2983	3.56238e-06	5.96723e-10
43.3908	3.54308e-06	5.83079e-10
43.4833	3.52382e-06	5.69748e-10
43.5758	3.50459e-06	5.56721e-10
43.6684	3.48539e-06	5.43992e-10
43.7609	3.46621e-06	5.31554e-10
43.8534	3.44707e-06	5.19401e-10
43.9459	3.42796e-06	5.07525e-10
44.0384	3.40888e-06	4.95921e-10
44.1309	3.38983e-06	4.84582e-10
44.2235	3.3708e-06	4.73503e-10
44.316	3.35181e-06	4.62677e-10
44.4085	3.33285e-06	4.52098e-10
44.501	3.31391e-06	4.41761e-10
44.5935	3.29501e-06	4.31661e-10
44.686	3.27614e-06	4.21792e-10
44.7786	3.25729e-06	4.12148e-10
44.8711	3.23848e-06	4.02724e-10
44.9636	3.21969e-06	3.93517e-10
45.0561	3.20094e-06	3.84519e-10
45.1486	3.18221e-06	3.75728e-10
45.2412	3.16351e-06	3.67137e-10
45.3337	3.14485e-06	3.58743e-10
45.4262	3.12621e-06	3.5054e-10
45.5187	3.1076e-06	3.42526e-10
45.6112	3.08902e-06	3.34694e-10
45.7037	3.07047e-06	3.27042e-10
45.7963	3.05195e-06	3.19564e-10
45.8888	3.03345e-06	3.12258e-10
45.9813	3.01499e-06	3.05118e-10
46.0738	2.99656e-06	2.98142e-10
46.1663	2.97815e-06	2.91325e-10
46.2588	2.95977e-06	2.84665e-10
46.3514	2.94143e-06	2.78156e-10
46.4439	2.92311e-06	2.71796e-10
46.5364	2.90481e-06	2.65582e-10
46.6289	2.88655e-06	2.5951e-10
46.7214	2.86832e-06	2.53576e-10
46.814	2.85011e-06	2.47778e-10
46.9065	2.83194e-06	2.42113e-10
46.999	2.81379e-06	2.36578e-10
47.0915	2.79567e-06	2.31168e-10
47.184	2.77758e-06	2.25883e-10
47.2765	2.75951e-06	2.20718e-10
47.3691	2.74148e-06	2.15672e-10
47.4616	2.72347e-06	2.10741e-10
47.5541	2.70549e-06	2.05922e-10
47.6466	2.68754e-06	2.01214e-10
47.7391	2.66962e-06	1.96613e-10
47.8316	2.65172e-06	1.92118e-10
47.9242	2.63385e-06	1.87726e-10
48.0167	2.61601e-06	1.83433e-10
48.1092	2.5982e-06	1.7924e-10
48.2017	2.58042e-06	1.75141e-10
48.2942	2.56266e-06	1.71137e-10
48.3868	2.54493e-06	1.67224e-10
48.4793	2.52723e-06	1.63401e-10
48.5718	2.50955e-06	1.59665e-10
48.6643	2.49191e-06	1.56014e-10
48.7568	2.47429e-06	1.52447e-10
48.8493	2.45669e-06	1.48961e-10
48.9419	2.43913e-06	1.45555e-10
49.0344	2.42159e-06	1.42228e-10
49.1269	2.40408e-06	1.38976e-10
49.2194	2.38659e-06	1.35798e-10
49.3119	2.36913e-06	1.32693e-10
49.4045	2.3517e-06	1.29659e-10
49.497	2.3343e-06	1.26695e-10
49.5895	2.31692e-06	1.23798e-10
49.682	2.29956e-06	1.20968e-10
49.7745	2.28224e-06	1.18202e-10
49.867	2.26494e-06	1.15499e-10
49.9596	2.24767e-06	1.12858e-10
50.0521	2.23042e-06	1.10278e-10
50.1446	2.2132e-06	1.07757e-10
50.2371	2.196e-06	1.05293e-10
50.3296	2.17884e-06	1.02886e-10
50.4221	2.16169e-06	1.00533e-10
50.5147	2.14458e-06	9.82343e-11
50.6072	2.12748e-06	9.59886e-11
50.6997	2.11042e-06	9.37939e-11
50.7922	2.09338e-06	9.16492e-11
50.8847	2.07636e-06	8.95537e-11
50.9773	2.05937e-06	8.75063e-11
51.0698	2.04241e-06	8.55056e-11
51.1623	2.02547e-06	8.35504e-11
51.2548	2.00856e-06	8.16402e-11
51.3473	1.99167e-06	7.97735e-11
51.4398	1.9748e-06	7.79495e-11
51.5324	1.95796e-06	7.61674e-11
51.6249	1.94115e-06	7.44258e-11
51.7174	1.92436e-06	7.27242e-11
51.8099	1.90759e-06	7.10615e-11
51.9024	1.89085e-06	6.94368e-11
51.9949	1.87413e-06	6.78493e-11
52.0875	1.85744e-06	6.62978e-11
52.18	1.84077e-06	6.47819e-11
52.2725	1.82412e-06	6.33008e-11
52.365	1.8075e-06	6.18536e-11
52.4575	1.7909e-06	6.04393e-11
52.5501	1.77433e-06	5.90574e-11
52.6426	1.75778e-06	5.77072e-11
52.7351	1.74125e-06	5.63877e-11
52.8276	1.72474e-06	5.50986e-11
52.9201	1.70826e-06	5.38387e-11
53.0126	1.6918e-06	5.26076e-11
53.1052	1.67537e-06	5.1405e-11
53.1977	1.65895e-06	5.02297e-11
53.2902	1.64256e-06	4.9081e-11
53.3827	1.62619e-06	4.7959e-11
53.4752	1.60985e-06	4.68626e-11
53.5677	1.59352e-06	4.57909e-11
53.6603	1.57722e-06	4.47439e-11
53.7528	1.56094e-06	4.3721e-11
53.8453	1.54468e-06	4.27212e-11
53.9378	1.52845e-06	4.17446e-11
54.0303	1.51223e-06	4.07902e-11
54.1229	1.49604e-06	3.98576e-11
54.2154	1.47987e-06	3.89462e-11
54.3079	1.46371e-06	3.80558e-11
54.4004	1.44758e-06	3.71857e-11
54.4929	1.43147e-06	3.63355e-11
54.5854	1.41538e-06	3.55046e-11
54.678	1.39931e-06	3.46928e-11
54.7705	1.38326e-06	3.38996e-11
54.863	1.36723e-06	3.31245e-11
54.9555	1.35123e-06	3.23672e-11
55.048	1.33524e-06	3.16272e-11
55.1405	1.31927e-06	3.09041e-11
55.2331	1.30331e-06	3.01975e-11
55.3256	1.28738e-06	2.9507e-11
55.4181	1.27147e-06	2.88324e-11
55.5106	1.25557e-06	2.81732e-11
55.6031	1.2397e-06	2.7529e-11
55.6957	1.22384e-06	2.68997e-11
55.7882	1.208e-06	2.62846e-11
55.8807	1.19218e-06	2.56835e-11
55.9732	1.17638e-06	2.50963e-11
56.0657	1.16059e-06	2.45225e-11
56.1582	1.14482e-06	2.39619e-11
56.2508	1.12907e-06	2.3414e-11
56.3433	1.11334e-06	2.28785e-11
56.4358	1.09762e-06	2.23556e-11
56.5283	1.08192e-06	2.18445e-11
56.6208	1.06623e-06	2.13451e-11
56.7133	1.05056e-06	2.08568e-11
56.8059	1.03491e-06	2.03802e-11
56.8984	1.01927e-06	1.99141e-11
56.9909	1.00364e-06	1.94587e-11
57.0834	9.88036e-07	1.90138e-11
57.1759	9.72442e-07	1.8579e-11
57.2685	9.56863e-07	1.81544e-11
57.361	9.41298e-07	1.77393e-11
57.4535	9.25747e-07	1.73337e-11
57.546	9.1021e-07	1.69373e-11
57.6385	8.94686e-07	1.65501e-11
57.731	8.79175e-07	1.61717e-11
57.8236	8.63677e-07	1.58019e-11
57.9161	8.48191e-07	1.54407e-11
58.0086	8.32718e-07	1.50876e-11
58.1011	8.17257e-07	1.47426e-11
58.1936	8.01807e-07	1.44057e-11
58.2861	7.86368e-07	1.40762e-11
58.3787	7.70941e-07	1.37542e-11
58.4712	7.55524e-07	1.34399e-11
58.5637	7.40117e-07	1.31325e-11
58.6562	7.2472e-07	1.28324e-11
58.7487	7.09333e-07	1.2539e-11
58.8413	6.93956e-07	1.22522e-11
58.9338	6.78587e-07	1.19721e-11
59.0263	6.63227e-07	1.16983e-11
59.1188	6.47874e-07	1.14308e-11
59.2113	6.3253e-07	1.11694e-11
59.3038	6.17193e-07	1.09143e-11
59.3964	6.01864e-07	1.06646e-11
59.4889	5.86541e-07	1.04209e-11
59.5814	5.71224e-07	1.01827e-11
59.6739	5.55913e-07	9.94974e-12
59.7664	5.40608e-07	9.72222e-12
59.859	5.25307e-07	9.50009e-12
59.9515	5.10011e-07	9.28271e-12
60.044	4.94719e-07	9.0704e-12
60.1365	4.79431e-07	8.86316e-12
60.229	4.64147e-07	8.66035e-12
60.3215	4.48865e-07	8.4623e-12
60.4141	4.33585e-07	8.26901e-12
60.5066	4.18307e-07	8.07983e-12
60.5991	4.03031e-07	7.89509e-12
60.6916	3.87755e-07	7.71478e-12
60.7841	3.7248e-07	7.53828e-12
60.8766	3.57205e-07	7.3659e-12
60.9692	3.41929e-07	7.19763e-12
61.0617	3.26651e-07	7.03285e-12
61.1542	3.11372e-07	6.8722e-12
61.2467	2.96091e-07	6.71502e-12
61.3392	2.80807e-07	6.56134e-12
61.4318	2.65519e-07	6.41145e-12
61.5243	2.50228e-07	6.26473e-12
61.6168	2.34931e-07	6.1215e-12
61.7093	2.1963e-07	5.98176e-12
61.8018	2.04322e-07	5.84487e-12
61.8943	1.89009e-07	5.71114e-12
61.9869	1.73688e-07	5.58059e-12
62.0794	1.46787e-07	1.00954e-09
62.1719	1.24055e-07	1.01986e-09
62.2644	1.04846e-07	1.0303e-09
62.3569	8.86134e-08	1.04083e-09
62.4494	7.48965e-08	1.05148e-09
62.542	6.33054e-08	1.06224e-09
62.6345	5.35105e-08	1.0731e-09
62.727	4.52335e-08	1.08408e-09
62.8195	3.82392e-08	1.09517e-09
62.912	3.23288e-08	1.10637e-09
63.0046	2.73343e-08	1.11769e-09
63.0971	2.31138e-08	1.12912e-09
63.1896	1.95474e-08	1.14067e-09
63.2821	1.65336e-08	1.15234e-09
63.3746	1.39869e-08	1.16412e-09
63.4671	1.18348e-08	1.17603e-09
63.5597	1.00163e-08	1.18806e-09
63.6522	8.47956e-09	1.20021e-09
63.7447	7.18098e-09	1.21249e-09
63.8372	6.08363e-09	1.22489e-09
63.9297	5.15634e-09	1.23742e-09
64.0222	4.37275e-09	1.25008e-09
64.1148	3.7106e-09	1.26287e-09
64.2073	3.15106e-09	1.27579e-09
64.2998	2.67823e-09	1.28884e-09
64.3923	2.27867e-09	1.30202e-09
64.4848	1.94103e-09	1.31534e-09
64.5774	1.65572e-09	1.32879e-09
64.6699	1.41462e-09	1.34238e-09
64.7624	1.21088e-09	1.35611e-09
64.8549	1.03872e-09	1.36999e-09
64.9474	8.93237e-10	1.384e-09
65.0399	7.70299e-10	1.39816e-09
65.1325	6.66413e-10	1.41246e-09
65.225	5.78625e-10	1.42691e-09
65.3175	5.04443e-10	1.4415e-09
65.41	4.41756e-10	1.45625e-09
65.5025	3.88784e-10	1.47114e-09
65.595	3.4402e-10	1.48619e-09
65.6876	3.06194e-10	1.50139e-09
65.7801	2.7423e-10	1.51675e-09
65.8726	2.47219e-10	1.53227e-09
65.9651	2.24394e-10	1.54794e-09
66.0576	2.05106e-10	1.56377e-09
66.1502	1.88807e-10	1.57977e-09
66.2427	1.75034e-10	1.59593e-09
66.3352	1.63396e-10	1.61225e-09
66.4277	1.53561e-10	1.62874e-09
66.5202	1.4525e-10	1.6454e-09
66.6127	1.38227e-10	1.66223e-09
66.7053	1.32292e-10	1.67924e-09
66.7978	1.27277e-10	1.69641e-09
66.8903	1.2304e-10	1.71377e-09
66.9828	1.19459e-10	1.7313e-09
67.0753	1.16432e-10	1.74901e-09
67.1678	1.13875e-10	1.7669e-09
67.2604	1.11714e-10	1.78497e-09
67.3529	1.09889e-10	1.80323e-09
67.4454	1.08345e-10	1.82167e-09
67.5379	1.07042e-10	1.84031e-09
67.6304	1.0594e-10	1.85913e-09
67.723	1.05009e-10	1.87815e-09
67.8155	1.04222e-10	1.89736e-09
67.908	1.03557e-10	1.91677e-09
68.0005	1.02995e-10	1.93637e-09
68.093	1.0252e-10	1.95618e-09
68.1855	1.02119e-10	1.97619e-09
68.2781	1.0178e-10	1.9964e-09
68.3706	1.01494e-10	2.01683e-09
68.4631	1.01252e-10	2.03746e-09
68.5556	1.01047e-10	2.0583e-09
68.6481	1.00874e-10	2.07935e-09
68.7406	1.00728e-10	2.10062e-09
68.8332	1.00605e-10	2.12211e-09
68.9257	1.005e-10	2.14381e-09
69.0182	1.00412e-10	2.16574e-09
69.1107	1.00338e-10	2.1879e-09
69.2032	1.00275e-10	2.21028e-09
69.2958	1.00221e-10	2.23288e-09
69.3883	1.00177e-10	2.25572e-09
69.4808	1.00139e-10	2.2788e-09
69.5733	1.00106e-10	2.30211e-09
69.6658	1.0008e-10	2.32566e-09
69.7583	1.00056e-10	2.34944e-09
69.8509	1.00037e-10	2.37348e-09
69.9434	1.00021e-10	2.39775e-09
70.0359	1.00007e-10	2.42228e-09
70.1284	9.99952e-11	2.44706e-09
70.2209	9.99854e-11	2.47209e-09
70.3135	9.99772e-11	2.49738e-09
70.406	9.99699e-11	2.52292e-09
70.4985	9.99642e-11	2.54873e-09
70.591	9.99591e-11	2.5748e-09
70.6835	9.99547e-11	2.60114e-09
70.776	9.99512e-11	2.62774e-09
70.8686	9.9948e-11	2.65462e-09
70.9611	9.99455e-11	2.68178e-09
71.0536	9.99433e-11	2.70921e-09
71.1461	9.99417e-11	2.73692e-09
71.2386	9.99401e-11	2.76492e-09
71.3311	9.99388e-11	2.7932e-09
71.4237	9.99376e-11	2.82177e-09
71.5162	9.99366e-11	2.85063e-09
71.6087	9.9936e-11	2.87979e-09
71.7012	9.9935e-11	2.90925e-09
71.7937	9.99347e-11	2.93901e-09
71.8863	9.99341e-11	2.96907e-09
71.9788	9.99338e-11	2.99944e-09
72.0713	9.99335e-11	3.03012e-09
72.1638	9.99331e-11	3.06112e-09
72.2563	9.99328e-11	3.09243e-09
72.3488	9.99328e-11	3.12406e-09
72.4414	9.99325e-11	3.15602e-09
72.5339	9.99325e-11	3.1883e-09
72.6264	9.99322e-11	3.22091e-09
72.7189	9.99322e-11	3.25386e-09
72.8114	9.99322e-11	3.28714e-09
72.9039	9.99319e-11	3.32076e-09
72.9965	9.99319e-11	3.35473e-09
73.089	9.99319e-11	3.38905e-09
73.1815	9.99319e-11	3.42371e-09
73.274	9.99319e-11	3.45873e-09
73.3665	9.99319e-11	3.49411e-09
73.4591	9.99316e-11	3.52985e-09
73.5516	9.99316e-11	3.56596e-09
73.6441	9.99316e-11	3.60244e-09
73.7366	9.99316e-11	3.63929e-09
73.8291	9.99316e-11	3.67651e-09
73.9216	9.99316e-11	3.71412e-09
74.0142	9.99316e-11	3.75211e-09
74.1067	9.99316e-11	3.79049e-09
74.1992	9.99316e-11	3.82926e-09
74.2917	9.99316e-11	3.86843e-09
74.3842	9.99316e-11	3.908e-09
74.4767	9.99316e-11	3.94798e-09
74.5693	9.99316e-11	3.98836e-09
74.6618	9.99316e-11	4.02916e-09
74.7543	9.99316e-11	4.07037e-09
74.8468	9.99316e-11	4.11201e-09
74.9393	9.99316e-11	4.15407e-09
75.0319	9.99316e-11	4.19656e-09
75.1244	9.99316e-11	4.23948e-09
75.2169	9.99316e-11	4.28285e-09
75.3094	9.99316e-11	4.32666e-09
75.4019	9.99316e-11	4.37092e-09
75.4944	9.99316e-11	4.41563e-09
75.587	9.99316e-11	4.46079e-09
75.6795	9.99316e-11	4.50642e-09
75.772	9.99316e-11	4.55252e-09
75.8645	9.99316e-11	4.59908e-09
75.957	9.99316e-11	4.64613e-09
76.0495	9.99316e-11	4.69365e-09
76.1421	9.99316e-11	4.74166e-09
76.2346	9.99316e-11	4.79017e-09
76.3271	9.99316e-11	4.83916e-09
76.4196	9.99316e-11	4.88866e-09
76.5121	9.99316e-11	4.93867e-09
76.6047	9.99316e-11	4.98919e-09
76.6972	9.99316e-11	5.04022e-09
76.7897	9.99316e-11	5.09178e-09
76.8822	9.99316e-11	5.14386e-09
76.9747	9.99316e-11	5.19648e-09
77.0672	9.99316e-11	5.24963e-09
77.1598	9.99316e-11	5.30333e-09
77.2523	9.99316e-11	5.35758e-09
77.3448	9.99316e-11	5.41238e-09
77.4373	9.99316e-11	5.46774e-09
77.5298	9.99316e-11	5.52367e-09
77.6223	9.99316e-11	5.58017e-09
77.7149	9.99316e-11	5.63725e-09
77.8074	9.99316e-11	5.69491e-09
77.8999	9.99316e-11	5.75317e-09
77.9924	9.99316e-11	5.81201e-09
78.0849	9.99316e-11	5.87146e-09
78.1775	9.99316e-11	5.93152e-09
78.27	9.99316e-11	5.9922e-09
78.3625	9.99316e-11	6.05349e-09
78.455	9.99316e-11	6.11541e-09
78.5475	9.99316e-11	6.17796e-09
78.64	9.99316e-11	6.24116e-09
78.7326	9.99316e-11	6.305e-09
78.8251	9.99316e-11	6.36949e-09

## Sheet: profiles
depth	CO2	CH4	SF6	CFC_11	CFC_12	CFC_113	HFC_134a	CH3CCl3	14CO2	15NJeff	CCl4
0	382.39	1837.16	6.647	245.83	536.85	78.122	52.82	11.332	487.221	1	91.67
0.0925177	382.428	1837.24	6.64644	245.835	536.854	78.1237	52.8081	11.341	487.273	1	91.6731
0.185035	382.467	1837.33	6.64586	245.84	536.859	78.1254	52.7961	11.3501	487.325	1	91.6763
0.277553	382.505	1837.41	6.64528	245.846	536.864	78.1272	52.7838	11.3595	487.377	1	91.6795
0.370071	382.544	1837.49	6.64468	245.851	536.868	78.1289	52.7714	11.369	487.43	1	91.6828
0.462588	382.583	1837.58	6.64406	245.857	536.873	78.1308	52.7587	11.3786	487.483	1	91.6861
0.555106	382.623	1837.67	6.64344	245.862	536.878	78.1326	52.7458	11.3884	487.537	1	91.6895
0.647624	382.663	1837.75	6.6428	245.868	536.883	78.1344	52.7327	11.3983	487.591	1	91.693
0.740142	382.704	1837.84	6.64215	245.874	536.888	78.1363	52.7194	11.4085	487.647	1	91.6965
0.832659	382.744	1837.93	6.6415	245.88	536.893	78.1382	52.7059	11.4189	487.703	1	91.7001
0.925177	382.786	1838.02	6.64083	245.886	536.898	78.1401	52.6922	11.4295	487.759	1	91.7038
1.01769	382.827	1838.11	6.64015	245.892	536.903	78.1421	52.6783	11.4403	487.817	1	91.7075
1.11021	382.869	1838.21	6.63947	245.898	536.908	78.1441	52.6643	11.4513	487.874	1	91.7113
1.20273	382.911	1838.3	6.63877	245.905	536.914	78.1461	52.65	11.4624	487.933	1	91.7152
1.29525	382.954	1838.39	6.63806	245.911	536.919	78.1482	52.6355	11.4737	487.991	1	91.7191
1.38777	382.996	1838.49	6.63734	245.918	536.924	78.1503	52.6209	11.4851	488.05	1	91.7231
1.48028	383.039	1838.58	6.63661	245.924	536.93	78.1524	52.606	11.4967	488.109	1	91.7272
1.5728	383.082	1838.67	6.63586	245.931	536.935	78.1545	52.591	11.5084	488.168	1	91.7313
1.66532	383.125	1838.77	6.63511	245.938	536.941	78.1566	52.5758	11.5204	488.228	1	91.7355
1.75784	383.169	1838.87	6.63434	245.944	536.947	78.1588	52.5604	11.5325	488.288	1	91.7397
1.85035	383.212	1838.96	6.63356	245.951	536.952	78.161	52.5449	11.5449	488.348	1	91.744
1.94287	383.256	1839.06	6.63276	245.958	536.958	78.1632	52.5291	11.5575	488.408	1	91.7483
2.03539	383.299	1839.16	6.63196	245.965	536.964	78.1654	52.5132	11.5702	488.469	1.00001	91.7527
2.12791	383.343	1839.26	6.63114	245.973	536.97	78.1677	52.4971	11.5832	488.53	1.00001	91.7572
2.22042	383.387	1839.36	6.63031	245.98	536.975	78.17	52.4809	11.5964	488.591	1.00001	91.7617
2.31294	383.431	1839.46	6.62947	245.987	536.981	78.1723	52.4644	11.6098	488.652	1.00001	91.7663
2.40546	383.475	1839.56	6.62861	245.995	536.987	78.1746	52.4478	11.6234	488.714	1.00001	91.7709
2.49798	383.52	1839.66	6.62775	246.002	536.993	78.1769	52.4311	11.6372	488.776	1.00001	91.7756
2.5905	383.564	1839.76	6.62687	246.01	536.999	78.1793	52.4141	11.6513	488.838	1.00001	91.7803
2.68301	383.609	1839.86	6.62598	246.018	537.005	78.1817	52.3971	11.6655	488.9	1.00001	91.7851
2.77553	383.653	1839.96	6.62507	246.026	537.011	78.1841	52.3798	11.6799	488.962	1.00001	91.7899
2.86805	383.698	1840.07	6.62416	246.033	537.018	78.1865	52.3624	11.6945	489.024	1.00001	91.7949
2.96057	383.742	1840.17	6.62323	246.041	537.024	78.189	52.3448	11.7094	489.087	1.00001	91.7998
3.05308	383.787	1840.27	6.62228	246.049	537.03	78.1914	52.3271	11.7244	489.149	1.00001	91.8048
3.1456	383.832	1840.37	6.62133	246.058	537.036	78.1939	52.3092	11.7397	489.212	1.00001	91.8099
3.23812	383.876	1840.48	6.62036	246.066	537.042	78.1964	52.2912	11.7552	489.274	1.00001	91.815
3.33064	383.921	1840.58	6.61938	246.074	537.049	78.199	52.273	11.7709	489.337	1.00001	91.8202
3.42315	383.965	1840.69	6.61839	246.082	537.055	78.2015	52.2546	11.7868	489.4	1.00001	91.8254
3.51567	384.01	1840.79	6.61738	246.091	537.061	78.2041	52.2361	11.803	489.463	1.00001	91.8307
3.60819	384.054	1840.89	6.61636	246.1	537.068	78.2066	52.2175	11.8194	489.525	1.00001	91.8361
3.70071	384.099	1841	6.61532	246.108	537.074	78.2092	52.1987	11.836	489.588	1.00001	91.8415
3.79323	384.143	1841.1	6.61428	246.117	537.081	78.2118	52.1798	11.8528	489.651	1.00001	91.8469
3.88574	384.188	1841.21	6.61322	246.126	537.087	78.2145	52.1607	11.8699	489.713	1.00001	91.8524
3.97826	384.232	1841.32	6.61214	246.135	537.094	78.2171	52.1414	11.8872	489.776	1.00001	91.858
4.07078	384.276	1841.42	6.61105	246.143	537.1	78.2198	52.122	11.9047	489.839	1.00001	91.8636
4.1633	384.321	1841.53	6.60995	246.152	537.107	78.2225	52.1024	11.9224	489.901	1.00001	91.8692
4.25581	384.365	1841.63	6.60883	246.162	537.113	78.2252	52.0827	11.9404	489.963	1.00001	91.8749
4.34833	384.409	1841.74	6.60771	246.171	537.12	78.2279	52.0627	11.9586	490.026	1.00001	91.8807
4.44085	384.452	1841.85	6.60656	246.18	537.127	78.2306	52.0426	11.977	490.088	1.00001	91.8865
4.53337	384.496	1841.96	6.6054	246.189	537.133	78.2333	52.0223	11.9957	490.15	1.00001	91.8923
4.62588	384.54	1842.06	6.60423	246.199	537.14	78.2361	52.0018	12.0146	490.212	1.00001	91.8983
4.7184	384.583	1842.17	6.60304	246.208	537.147	78.2389	51.9811	12.0338	490.273	1.00001	91.9042
4.81092	384.626	1842.28	6.60183	246.218	537.154	78.2417	51.9603	12.0531	490.335	1.00001	91.9102
4.90344	384.67	1842.38	6.60061	246.228	537.16	78.2445	51.9393	12.0727	490.396	1.00001	91.9163
4.99596	384.713	1842.49	6.59937	246.237	537.167	78.2473	51.9181	12.0926	490.458	1.00001	91.9224
5.08847	384.756	1842.6	6.59812	246.247	537.174	78.2502	51.8967	12.1126	490.519	1.00001	91.9285
5.18099	384.798	1842.71	6.59685	246.257	537.181	78.253	51.8752	12.133	490.58	1.00001	91.9347
5.27351	384.841	1842.82	6.59556	246.267	537.188	78.2559	51.8534	12.1536	490.64	1.00002	91.941
5.36603	384.883	1842.93	6.59425	246.277	537.195	78.2587	51.8315	12.1744	490.701	1.00002	91.9473
5.45854	384.925	1843.03	6.59293	246.288	537.202	78.2616	51.8095	12.1956	490.761	1.00002	91.9537
5.55106	384.967	1843.14	6.59159	246.298	537.209	78.2645	51.7872	12.217	490.821	1.00002	91.9601
5.64358	385.009	1843.25	6.59023	246.308	537.216	78.2675	51.7648	12.2387	490.881	1.00002	91.9666
5.7361	385.051	1843.36	6.58886	246.319	537.223	78.2704	51.7422	12.2607	490.94	1.00002	91.9731
5.82861	385.092	1843.47	6.58747	246.329	537.23	78.2734	51.7194	12.283	490.999	1.00002	91.9798
5.92113	385.133	1843.58	6.58606	246.34	537.237	78.2764	51.6964	12.3056	491.058	1.00002	91.9864
6.01365	385.174	1843.69	6.58464	246.351	537.244	78.2794	51.6733	12.3284	491.117	1.00002	91.9932
6.10617	385.215	1843.8	6.5832	246.362	537.252	78.2824	51.65	12.3516	491.176	1.00002	92
6.19869	385.255	1843.91	6.58174	246.373	537.259	78.2854	51.6265	12.375	491.234	1.00002	92.0068
6.2912	385.296	1844.02	6.58026	246.384	537.266	78.2884	51.6028	12.3988	491.291	1.00002	92.0137
6.38372	385.335	1844.12	6.57876	246.395	537.273	78.2915	51.579	12.4228	491.349	1.00002	92.0207
6.47624	385.375	1844.23	6.57725	246.406	537.28	78.2946	51.555	12.4472	491.406	1.00002	92.0278
6.56876	385.415	1844.34	6.57572	246.418	537.288	78.2976	51.5308	12.4718	491.463	1.00002	92.0349
6.66127	385.454	1844.45	6.57417	246.429	537.295	78.3008	51.5064	12.4967	491.519	1.00002	92.0421
6.75379	385.493	1844.56	6.5726	246.441	537.302	78.3039	51.4818	12.522	491.576	1.00002	92.0493
6.84631	385.531	1844.67	6.57102	246.453	537.309	78.307	51.4571	12.5475	491.631	1.00002	92.0566
6.93883	385.57	1844.78	6.56942	246.464	537.317	78.3101	51.4322	12.5734	491.687	1.00002	92.064
7.03135	385.608	1844.89	6.5678	246.476	537.324	78.3133	51.4071	12.5996	491.742	1.00002	92.0714
7.12386	385.645	1845	6.56616	246.488	537.331	78.3165	51.3819	12.626	491.796	1.00002	92.0789
7.21638	385.683	1845.11	6.5645	246.5	537.339	78.3196	51.3564	12.6528	491.851	1.00002	92.0864
7.3089	385.72	1845.22	6.56282	246.512	537.346	78.3228	51.3308	12.6799	491.905	1.00002	92.0941
7.40142	385.757	1845.33	6.56113	246.524	537.353	78.326	51.305	12.7074	491.958	1.00002	92.1017
7.49393	385.793	1845.44	6.55942	246.537	537.361	78.3292	51.2791	12.7351	492.011	1.00002	92.1095
7.58645	385.829	1845.55	6.55769	246.549	537.368	78.3325	51.2529	12.7632	492.064	1.00002	92.1173
7.67897	385.865	1845.66	6.55594	246.562	537.375	78.3357	51.2266	12.7916	492.116	1.00002	92.1252
7.77149	385.901	1845.77	6.55417	246.574	537.383	78.3389	51.2001	12.8203	492.168	1.00002	92.1331
7.864	385.936	1845.87	6.55238	246.587	537.39	78.3422	51.1734	12.8493	492.219	1.00002	92.1411
7.95652	385.97	1845.98	6.55058	246.6	537.397	78.3455	51.1465	12.8787	492.27	1.00003	92.1492
8.04904	386.005	1846.09	6.54875	246.612	537.405	78.3487	51.1195	12.9084	492.321	1.00003	92.1573
8.14156	386.039	1846.2	6.54691	246.625	537.412	78.352	51.0923	12.9384	492.371	1.00003	92.1655
8.23408	386.072	1846.31	6.54505	246.638	537.419	78.3553	51.0648	12.9688	492.42	1.00003	92.1738
8.32659	386.105	1846.42	6.54317	246.651	537.427	78.3586	51.0373	12.9995	492.469	1.00003	92.1821
8.41911	386.138	1846.53	6.54127	246.665	537.434	78.3619	51.0095	13.0305	492.518	1.00003	92.1905
8.51163	386.171	1846.63	6.53935	246.678	537.441	78.3652	50.9815	13.0619	492.566	1.00003	92.199
8.60415	386.203	1846.74	6.53741	246.691	537.448	78.3685	50.9534	13.0936	492.614	1.00003	92.2075
8.69666	386.234	1846.85	6.53546	246.705	537.456	78.3719	50.9251	13.1256	492.661	1.00003	92.2161
8.78918	386.265	1846.96	6.53348	246.718	537.463	78.3752	50.8966	13.158	492.708	1.00003	92.2248
8.8817	386.296	1847.06	6.53149	246.732	537.47	78.3785	50.8679	13.1908	492.754	1.00003	92.2335
8.97422	386.327	1847.17	6.52947	246.746	537.477	78.3819	50.839	13.2239	492.799	1.00003	92.2423
9.06673	386.356	1847.28	6.52744	246.759	537.484	78.3852	50.8099	13.2573	492.845	1.00003	92.2511
9.15925	386.386	1847.38	6.52539	246.773	537.492	78.3886	50.7807	13.2911	492.889	1.00003	92.26
9.25177	386.415	1847.49	6.52332	246.787	537.499	78.3919	50.7512	13.3252	492.933	1.00003	92.269
9.34429	386.444	1847.6	6.52123	246.801	537.506	78.3953	50.7216	13.3597	492.977	1.00003	92.2781
9.43681	386.472	1847.7	6.51912	246.815	537.513	78.3986	50.6918	13.3946	493.02	1.00003	92.2872
9.52932	386.499	1847.81	6.51699	246.829	537.52	78.402	50.6618	13.4298	493.062	1.00003	92.2964
9.62184	386.527	1847.91	6.51484	246.844	537.527	78.4054	50.6316	13.4653	493.104	1.00003	92.3056
9.71436	386.553	1848.02	6.51268	246.858	537.534	78.4087	50.6012	13.5012	493.146	1.00003	92.3149
9.80688	386.58	1848.12	6.51049	246.873	537.541	78.4121	50.5706	13.5375	493.187	1.00003	92.3243
9.89939	386.606	1848.23	6.50829	246.887	537.548	78.4155	50.5399	13.5742	493.227	1.00003	92.3338
9.99191	386.631	1848.33	6.50606	246.902	537.555	78.4189	50.5089	13.6112	493.267	1.00003	92.3433
10.0844	386.656	1848.44	6.50382	246.916	537.561	78.4223	50.4777	13.6486	493.306	1.00003	92.3528
10.1769	386.68	1848.54	6.50155	246.931	537.568	78.4256	50.4464	13.6863	493.345	1.00003	92.3625
10.2695	386.704	1848.64	6.49927	246.946	537.575	78.429	50.4149	13.7245	493.383	1.00003	92.3722
10.362	386.727	1848.75	6.49697	246.961	537.582	78.4324	50.3831	13.7629	493.42	1.00004	92.382
10.4545	386.75	1848.85	6.49465	246.976	537.588	78.4358	50.3512	13.8018	493.457	1.00004	92.3918
10.547	386.773	1848.95	6.4923	246.991	537.595	78.4392	50.319	13.841	493.494	1.00004	92.4017
10.6395	386.795	1849.05	6.48994	247.006	537.602	78.4426	50.2867	13.8807	493.529	1.00004	92.4117
10.7321	386.816	1849.16	6.48756	247.021	537.608	78.4459	50.2542	13.9207	493.565	1.00004	92.4217
10.8246	386.837	1849.26	6.48516	247.036	537.615	78.4493	50.2214	13.961	493.599	1.00004	92.4319
10.9171	386.857	1849.36	6.48275	247.052	537.621	78.4527	50.1885	14.0018	493.633	1.00004	92.442
11.0096	386.877	1849.46	6.48031	247.067	537.628	78.4561	50.1554	14.0429	493.667	1.00004	92.4523
11.1021	386.897	1849.56	6.47785	247.083	537.634	78.4594	50.122	14.0844	493.7	1.00004	92.4626
11.1946	386.915	1849.66	6.47537	247.098	537.64	78.4628	50.0885	14.1264	493.732	1.00004	92.473
11.2872	386.934	1849.76	6.47288	247.114	537.646	78.4662	50.0547	14.1686	493.764	1.00004	92.4834
11.3797	386.952	1849.85	6.47036	247.13	537.653	78.4696	50.0208	14.2113	493.795	1.00004	92.4939
11.4722	386.969	1849.95	6.46783	247.145	537.659	78.4729	49.9866	14.2544	493.826	1.00004	92.5045
11.5647	386.986	1850.05	6.46527	247.161	537.665	78.4763	49.9522	14.2979	493.856	1.00004	92.5152
11.6572	387.002	1850.15	6.4627	247.177	537.671	78.4796	49.9176	14.3417	493.886	1.00004	92.5259
11.7497	387.018	1850.24	6.46011	247.193	537.677	78.483	49.8829	14.386	493.915	1.00004	92.5367
11.8423	387.033	1850.34	6.45749	247.209	537.683	78.4863	49.8479	14.4306	493.943	1.00004	92.5475
11.9348	387.047	1850.44	6.45486	247.225	537.689	78.4897	49.8127	14.4756	493.971	1.00004	92.5584
12.0273	387.061	1850.53	6.45221	247.241	537.694	78.493	49.7772	14.5211	493.998	1.00004	92.5694
12.1198	387.075	1850.63	6.44954	247.258	537.7	78.4964	49.7416	14.5669	494.024	1.00004	92.5805
12.2123	387.088	1850.72	6.44685	247.274	537.706	78.4997	49.7058	14.6131	494.051	1.00004	92.5916
12.3049	387.101	1850.82	6.44414	247.29	537.711	78.503	49.6697	14.6597	494.076	1.00004	92.6028
12.3974	387.113	1850.91	6.44142	247.307	537.717	78.5063	49.6335	14.7068	494.101	1.00004	92.6141
12.4899	387.124	1851	6.43867	247.323	537.722	78.5096	49.597	14.7542	494.125	1.00004	92.6254
12.5824	387.135	1851.1	6.4359	247.34	537.727	78.5129	49.5603	14.802	494.149	1.00004	92.6368
12.6749	387.145	1851.19	6.43312	247.357	537.733	78.5162	49.5234	14.8503	494.172	1.00005	92.6482
12.7674	387.155	1851.28	6.43032	247.373	537.738	78.5195	49.4862	14.8989	494.195	1.00005	92.6598
12.86	387.165	1851.37	6.42749	247.39	537.743	78.5228	49.4489	14.9479	494.217	1.00005	92.6714
12.9525	387.173	1851.46	6.42465	247.407	537.748	78.5261	49.4113	14.9974	494.238	1.00005	92.683
13.045	387.182	1851.55	6.42179	247.424	537.753	78.5293	49.3736	15.0472	494.259	1.00005	92.6948
13.1375	387.189	1851.64	6.41892	247.441	537.758	78.5326	49.3356	15.0974	494.279	1.00005	92.7066
13.23	387.197	1851.73	6.41602	247.458	537.763	78.5358	49.2974	15.1481	494.299	1.00005	92.7184
13.3225	387.203	1851.81	6.41311	247.475	537.767	78.539	49.2589	15.1991	494.318	1.00005	92.7304
13.4151	387.209	1851.9	6.41017	247.492	537.772	78.5423	49.2203	15.2506	494.337	1.00005	92.7423
13.5076	387.215	1851.99	6.40722	247.509	537.776	78.5455	49.1814	15.3024	494.355	1.00005	92.7544
13.6001	387.22	1852.07	6.40425	247.526	537.781	78.5487	49.1424	15.3547	494.373	1.00005	92.7665
13.6926	387.224	1852.16	6.40127	247.543	537.785	78.5519	49.1031	15.4074	494.39	1.00005	92.7787
13.7851	387.228	1852.25	6.39826	247.561	537.79	78.555	49.0636	15.4604	494.406	1.00005	92.791
13.8777	387.232	1852.33	6.39524	247.578	537.794	78.5582	49.0238	15.5139	494.422	1.00005	92.8033
13.9702	387.235	1852.41	6.3922	247.595	537.798	78.5614	48.9839	15.5677	494.437	1.00005	92.8157
14.0627	387.237	1852.5	6.38914	247.613	537.802	78.5645	48.9438	15.622	494.452	1.00005	92.8281
14.1552	387.239	1852.58	6.38607	247.63	537.806	78.5676	48.9034	15.6766	494.466	1.00005	92.8406
14.2477	387.241	1852.66	6.38298	247.648	537.809	78.5707	48.8628	15.7316	494.48	1.00005	92.8532
14.3402	387.241	1852.74	6.37987	247.665	537.813	78.5738	48.8221	15.787	494.493	1.00005	92.8658
14.4328	387.242	1852.82	6.37675	247.683	537.817	78.5769	48.7811	15.8429	494.506	1.00005	92.8785
14.5253	387.241	1852.9	6.37361	247.701	537.82	78.58	48.7399	15.899	494.518	1.00005	92.8913
14.6178	387.241	1852.98	6.37046	247.718	537.824	78.5831	48.6985	15.9556	494.53	1.00005	92.9041
14.7103	387.24	1853.06	6.36729	247.736	537.827	78.5861	48.6569	16.0126	494.541	1.00005	92.9169
14.8028	387.238	1853.13	6.3641	247.754	537.83	78.5891	48.6151	16.0699	494.551	1.00005	92.9298
14.8953	387.236	1853.21	6.3609	247.771	537.833	78.5921	48.5731	16.1276	494.561	1.00006	92.9428
14.9879	387.233	1853.29	6.35769	247.789	537.836	78.5951	48.5309	16.1856	494.571	1.00006	92.9558
15.0804	387.23	1853.36	6.35446	247.807	537.839	78.5981	48.4886	16.244	494.58	1.00006	92.9689
15.1729	387.226	1853.43	6.35121	247.825	537.842	78.601	48.446	16.3028	494.589	1.00006	92.9821
15.2654	387.222	1853.51	6.34796	247.843	537.844	78.604	48.4033	16.3619	494.597	1.00006	92.9952
15.3579	387.217	1853.58	6.34469	247.861	537.847	78.6069	48.3604	16.4213	494.604	1.00006	93.0085
15.4505	387.212	1853.65	6.3414	247.879	537.849	78.6098	48.3173	16.4811	494.611	1.00006	93.0217
15.543	387.206	1853.72	6.33811	247.897	537.852	78.6127	48.274	16.5413	494.618	1.00006	93.035
15.6355	387.2	1853.79	6.3348	247.915	537.854	78.6155	48.2306	16.6017	494.624	1.00006	93.0484
15.728	387.193	1853.86	6.33149	247.933	537.856	78.6184	48.187	16.6624	494.63	1.00006	93.0618
15.8205	387.186	1853.93	6.32816	247.951	537.858	78.6212	48.1433	16.7235	494.635	1.00006	93.0752
15.913	387.179	1854	6.32482	247.969	537.86	78.624	48.0994	16.7848	494.64	1.00006	93.0887
16.0056	387.171	1854.07	6.32147	247.987	537.861	78.6267	48.0554	16.8465	494.644	1.00006	93.1022
16.0981	387.162	1854.13	6.31812	248.004	537.863	78.6295	48.0112	16.9084	494.648	1.00006	93.1158
16.1906	387.153	1854.2	6.31475	248.022	537.865	78.6322	47.9669	16.9706	494.651	1.00006	93.1293
16.2831	387.144	1854.26	6.31138	248.04	537.866	78.6349	47.9225	17.033	494.654	1.00006	93.1429
16.3756	387.134	1854.32	6.308	248.058	537.867	78.6376	47.878	17.0957	494.656	1.00006	93.1566
16.4682	387.124	1854.39	6.30461	248.076	537.868	78.6402	47.8333	17.1587	494.658	1.00006	93.1702
16.5607	387.113	1854.45	6.30121	248.094	537.869	78.6428	47.7885	17.222	494.66	1.00006	93.1839
16.6532	387.102	1854.51	6.2978	248.112	537.87	78.6454	47.7435	17.2855	494.661	1.00006	93.1977
16.7457	387.091	1854.57	6.29438	248.13	537.871	78.648	47.6984	17.3494	494.662	1.00006	93.2114
16.8382	387.079	1854.63	6.29096	248.148	537.872	78.6506	47.6532	17.4134	494.662	1.00006	93.2252
16.9307	387.067	1854.68	6.28753	248.166	537.872	78.6531	47.6079	17.4778	494.662	1.00006	93.239
17.0233	387.054	1854.74	6.28409	248.184	537.873	78.6556	47.5624	17.5424	494.662	1.00007	93.2529
17.1158	387.041	1854.8	6.28064	248.202	537.873	78.6581	47.5168	17.6073	494.661	1.00007	93.2667
17.2083	387.027	1854.85	6.27719	248.22	537.873	78.6605	47.471	17.6724	494.66	1.00007	93.2806
17.3008	387.013	1854.91	6.27373	248.238	537.873	78.6629	47.4252	17.7378	494.658	1.00007	93.2945
17.3933	386.999	1854.96	6.27026	248.256	537.873	78.6654	47.3792	17.8035	494.656	1.00007	93.3085
17.4858	386.984	1855.01	6.26678	248.274	537.873	78.6677	47.333	17.8694	494.654	1.00007	93.3225
17.5784	386.969	1855.07	6.26329	248.291	537.873	78.6701	47.2867	17.9356	494.651	1.00007	93.3365
17.6709	386.954	1855.12	6.2598	248.309	537.872	78.6724	47.2403	18.0021	494.648	1.00007	93.3505
17.7634	386.938	1855.17	6.2563	248.327	537.872	78.6747	47.1938	18.0688	494.645	1.00007	93.3646
17.8559	386.922	1855.22	6.2528	248.345	537.871	78.677	47.1471	18.1358	494.641	1.00007	93.3787
17.9484	386.906	1855.26	6.24928	248.363	537.87	78.6792	47.1004	18.203	494.637	1.00007	93.3928
18.041	386.889	1855.31	6.24576	248.381	537.869	78.6814	47.0534	18.2705	494.633	1.00007	93.4069
18.1335	386.872	1855.36	6.24223	248.399	537.868	78.6836	47.0064	18.3383	494.628	1.00007	93.4211
18.226	386.854	1855.4	6.2387	248.416	537.867	78.6858	46.9592	18.4063	494.623	1.00007	93.4352
18.3185	386.836	1855.45	6.23516	248.434	537.866	78.688	46.9119	18.4746	494.617	1.00007	93.4495
18.411	386.818	1855.49	6.23161	248.452	537.864	78.6901	46.8644	18.5431	494.612	1.00007	93.4637
18.5035	386.799	1855.54	6.22805	248.47	537.863	78.6922	46.8168	18.6119	494.606	1.00007	93.4779
18.5961	386.78	1855.58	6.22449	248.487	537.861	78.6942	46.7691	18.681	494.6	1.00007	93.4922
18.6886	386.761	1855.62	6.22092	248.505	537.859	78.6963	46.7213	18.7503	494.593	1.00007	93.5065
18.7811	386.742	1855.66	6.21735	248.523	537.857	78.6983	46.6733	18.8199	494.586	1.00007	93.5209
18.8736	386.722	1855.7	6.21377	248.541	537.855	78.7002	46.6252	18.8897	494.579	1.00007	93.5352
18.9661	386.702	1855.74	6.21018	248.558	537.853	78.7022	46.577	18.9598	494.572	1.00007	93.5496
19.0586	386.681	1855.78	6.20659	248.576	537.851	78.7041	46.5287	19.0301	494.564	1.00007	93.564
19.1512	386.661	1855.82	6.20299	248.594	537.848	78.706	46.4802	19.1007	494.556	1.00008	93.5784
19.2437	386.64	1855.85	6.19938	248.611	537.846	78.7079	46.4316	19.1716	494.548	1.00008	93.5928
19.3362	386.618	1855.89	6.19577	248.629	537.843	78.7098	46.3828	19.2427	494.539	1.00008	93.6073
19.4287	386.597	1855.93	6.19215	248.647	537.84	78.7116	46.334	19.314	494.531	1.00008	93.6218
19.5212	386.575	1855.96	6.18852	248.664	537.837	78.7134	46.285	19.3856	494.522	1.00008	93.6363
19.6138	386.553	1855.99	6.18489	248.682	537.834	78.7151	46.2358	19.4575	494.513	1.00008	93.6508
19.7063	386.53	1856.03	6.18125	248.7	537.831	78.7169	46.1866	19.5296	494.503	1.00008	93.6654
19.7988	386.507	1856.06	6.17761	248.717	537.828	78.7186	46.1372	19.602	494.493	1.00008	93.6799
19.8913	386.485	1856.09	6.17396	248.735	537.824	78.7203	46.0877	19.6746	494.484	1.00008	93.6945
19.9838	386.461	1856.12	6.17031	248.752	537.821	78.7219	46.0381	19.7475	494.473	1.00008	93.7091
20.0763	386.438	1856.15	6.16665	248.77	537.817	78.7235	45.9883	19.8206	494.463	1.00008	93.7237
20.1689	386.414	1856.18	6.16298	248.787	537.813	78.7251	45.9384	19.894	494.453	1.00008	93.7384
20.2614	386.39	1856.21	6.15931	248.805	537.809	78.7267	45.8884	19.9676	494.442	1.00008	93.753
20.3539	386.366	1856.23	6.15563	248.822	537.805	78.7282	45.8383	20.0414	494.431	1.00008	93.7677
20.4464	386.341	1856.26	6.15195	248.84	537.801	78.7297	45.788	20.1156	494.42	1.00008	93.7824
20.5389	386.317	1856.29	6.14826	248.857	537.796	78.7312	45.7376	20.1899	494.408	1.00008	93.7971
20.6314	386.292	1856.31	6.14457	248.875	537.792	78.7327	45.6871	20.2646	494.397	1.00008	93.8119
20.724	386.266	1856.34	6.14087	248.892	537.787	78.7341	45.6365	20.3394	494.385	1.00008	93.8266
20.8165	386.241	1856.36	6.13716	248.909	537.782	78.7355	45.5857	20.4146	494.373	1.00008	93.8414
20.909	386.215	1856.38	6.13345	248.927	537.777	78.7369	45.5349	20.4899	494.361	1.00008	93.8562
21.0015	386.19	1856.4	6.12974	248.944	537.772	78.7382	45.4839	20.5656	494.349	1.00008	93.871
21.094	386.164	1856.43	6.12602	248.961	537.767	78.7395	45.4327	20.6414	494.336	1.00008	93.8858
21.1866	386.137	1856.45	6.12229	248.979	537.762	78.7408	45.3815	20.7176	494.324	1.00008	93.9006
21.2791	386.111	1856.47	6.11856	248.996	537.757	78.7421	45.3301	20.7939	494.311	1.00009	93.9155
21.3716	386.084	1856.49	6.11482	249.013	537.751	78.7433	45.2786	20.8705	494.298	1.00009	93.9304
21.4641	386.057	1856.5	6.11108	249.03	537.745	78.7445	45.227	20.9474	494.285	1.00009	93.9453
21.5566	386.03	1856.52	6.10733	249.048	537.74	78.7456	45.1753	21.0245	494.272	1.00009	93.9602
21.6491	386.003	1856.54	6.10358	249.065	537.734	78.7468	45.1234	21.1019	494.259	1.00009	93.9751
21.7417	385.976	1856.56	6.09982	249.082	537.728	78.7479	45.0714	21.1795	494.245	1.00009	93.99
21.8342	385.948	1856.57	6.09606	249.099	537.721	78.7489	45.0193	21.2573	494.231	1.00009	94.0049
21.9267	385.92	1856.59	6.09229	249.116	537.715	78.75	44.9671	21.3354	494.218	1.00009	94.0199
22.0192	385.892	1856.6	6.08852	249.134	537.709	78.751	44.9148	21.4138	494.204	1.00009	94.0349
22.1117	385.864	1856.61	6.08474	249.151	537.702	78.752	44.8623	21.4924	494.19	1.00009	94.0499
22.2042	385.836	1856.63	6.08096	249.168	537.695	78.7529	44.8098	21.5712	494.176	1.00009	94.0649
22.2968	385.807	1856.64	6.07717	249.185	537.688	78.7538	44.7571	21.6503	494.161	1.00009	94.0799
22.3893	385.779	1856.65	6.07338	249.202	537.681	78.7547	44.7043	21.7297	494.147	1.00009	94.0949
22.4818	385.75	1856.66	6.06958	249.219	537.674	78.7556	44.6513	21.8093	494.132	1.00009	94.11
22.5743	385.721	1856.67	6.06578	249.236	537.667	78.7564	44.5983	21.8891	494.118	1.00009	94.125
22.6668	385.692	1856.68	6.06198	249.253	537.66	78.7572	44.5451	21.9692	494.103	1.00009	94.1401
22.7594	385.663	1856.69	6.05816	249.27	537.652	78.758	44.4919	22.0495	494.088	1.00009	94.1552
22.8519	385.633	1856.7	6.05435	249.287	537.644	78.7587	44.4385	22.1301	494.074	1.00009	94.1703
22.9444	385.604	1856.71	6.05053	249.304	537.637	78.7594	44.385	22.2109	494.059	1.00009	94.1854
23.0369	385.574	1856.72	6.0467	249.321	537.629	78.7601	44.3314	22.292	494.043	1.00009	94.2005
23.1294	385.544	1856.72	6.04287	249.338	537.621	78.7607	44.2776	22.3733	494.028	1.00009	94.2156
23.2219	385.514	1856.73	6.03903	249.354	537.612	78.7614	44.2238	22.4549	494.013	1.00009	94.2308
23.3145	385.484	1856.73	6.03519	249.371	537.604	78.7619	44.1698	22.5367	493.998	1.00009	94.2459
23.407	385.454	1856.74	6.03135	249.388	537.596	78.7625	44.1158	22.6188	493.982	1.0001	94.2611
23.4995	385.424	1856.74	6.0275	249.405	537.587	78.763	44.0616	22.7011	493.967	1.0001	94.2763
23.592	385.393	1856.75	6.02364	249.422	537.578	78.7635	44.0073	22.7836	493.951	1.0001	94.2915
23.6845	385.363	1856.75	6.01978	249.438	537.569	78.7639	43.9529	22.8665	493.936	1.0001	94.3067
23.777	385.332	1856.75	6.01592	249.455	537.56	78.7643	43.8984	22.9495	493.92	1.0001	94.3219
23.8696	385.302	1856.75	6.01205	249.472	537.551	78.7647	43.8437	23.0328	493.904	1.0001	94.3371
23.9621	385.271	1856.75	6.00818	249.488	537.542	78.7651	43.789	23.1164	493.888	1.0001	94.3523
24.0546	385.24	1856.75	6.0043	249.505	537.533	78.7654	43.7342	23.2001	493.872	1.0001	94.3676
24.1471	385.209	1856.75	6.00042	249.522	537.523	78.7657	43.6792	23.2842	493.856	1.0001	94.3828
24.2396	385.178	1856.75	5.99653	249.538	537.513	78.7659	43.6241	23.3685	493.84	1.0001	94.3981
24.3322	385.146	1856.75	5.99264	249.555	537.503	78.7662	43.569	23.453	493.824	1.0001	94.4133
24.4247	385.115	1856.75	5.98874	249.571	537.493	78.7663	43.5137	23.5378	493.808	1.0001	94.4286
24.5172	385.084	1856.75	5.98484	249.588	537.483	78.7665	43.4583	23.6228	493.792	1.0001	94.4439
24.6097	385.052	1856.75	5.98094	249.604	537.473	78.7666	43.4028	23.7081	493.776	1.0001	94.4592
24.7022	385.02	1856.74	5.97703	249.621	537.463	78.7667	43.3472	23.7936	493.76	1.0001	94.4745
24.7947	384.989	1856.74	5.97311	249.637	537.452	78.7668	43.2915	23.8794	493.744	1.0001	94.4898
24.8873	384.957	1856.73	5.96919	249.654	537.442	78.7668	43.2357	23.9655	493.727	1.0001	94.5051
24.9798	384.925	1856.73	5.96527	249.67	537.431	78.7667	43.1798	24.0517	493.711	1.0001	94.5205
25.0723	384.893	1856.72	5.96134	249.687	537.42	78.7667	43.1238	24.1383	493.695	1.0001	94.5358
25.1648	384.861	1856.72	5.95741	249.703	537.409	78.7666	43.0677	24.225	493.678	1.0001	94.5511
25.2573	384.829	1856.71	5.95347	249.719	537.398	78.7665	43.0115	24.312	493.662	1.0001	94.5665
25.3498	384.797	1856.7	5.94953	249.736	537.386	78.7663	42.9551	24.3993	493.645	1.0001	94.5818
25.4424	384.765	1856.7	5.94559	249.752	537.375	78.7661	42.8987	24.4868	493.629	1.0001	94.5972
25.5349	384.733	1856.69	5.94164	249.768	537.363	78.7659	42.8422	24.5746	493.612	1.00011	94.6126
25.6274	384.7	1856.68	5.93768	249.784	537.351	78.7656	42.7856	24.6626	493.596	1.00011	94.628
25.7199	384.668	1856.67	5.93372	249.8	537.339	78.7653	42.7288	24.7509	493.579	1.00011	94.6434
25.8124	384.636	1856.66	5.92976	249.817	537.327	78.765	42.672	24.8394	493.563	1.00011	94.6587
25.905	384.603	1856.65	5.92579	249.833	537.315	78.7646	42.6151	24.9282	493.546	1.00011	94.6741
25.9975	384.571	1856.64	5.92182	249.849	537.303	78.7642	42.558	25.0172	493.53	1.00011	94.6896
26.09	384.538	1856.63	5.91784	249.865	537.29	78.7638	42.5009	25.1065	493.513	1.00011	94.705
26.1825	384.506	1856.62	5.91386	249.881	537.278	78.7633	42.4437	25.196	493.497	1.00011	94.7204
26.275	384.473	1856.61	5.90987	249.897	537.265	78.7628	42.3864	25.2858	493.48	1.00011	94.7358
26.3675	384.44	1856.59	5.90588	249.913	537.252	78.7622	42.329	25.3758	493.463	1.00011	94.7512
26.4601	384.408	1856.58	5.90189	249.929	537.239	78.7616	42.2715	25.4661	493.447	1.00011	94.7667
26.5526	384.375	1856.57	5.89789	249.945	537.226	78.761	42.2139	25.5566	493.43	1.00011	94.7821
26.6451	384.342	1856.55	5.89389	249.961	537.212	78.7603	42.1562	25.6474	493.414	1.00011	94.7976
26.7376	384.309	1856.54	5.88988	249.977	537.199	78.7596	42.0984	25.7384	493.397	1.00011	94.813
26.8301	384.277	1856.52	5.88587	249.993	537.185	78.7589	42.0405	25.8297	493.381	1.00011	94.8285
26.9227	384.244	1856.51	5.88185	250.008	537.172	78.7581	41.9825	25.9212	493.364	1.00011	94.8439
27.0152	384.211	1856.49	5.87783	250.024	537.158	78.7573	41.9244	26.013	493.348	1.00011	94.8594
27.1077	384.178	1856.48	5.8738	250.04	537.144	78.7564	41.8662	26.105	493.331	1.00011	94.8749
27.2002	384.145	1856.46	5.86977	250.056	537.129	78.7555	41.808	26.1973	493.315	1.00011	94.8904
27.2927	384.112	1856.44	5.86574	250.071	537.115	78.7546	41.7496	26.2898	493.298	1.00011	94.9058
27.3852	384.079	1856.43	5.8617	250.087	537.1	78.7536	41.6912	26.3826	493.282	1.00011	94.9213
27.4778	384.046	1856.41	5.85766	250.103	537.086	78.7526	41.6326	26.4757	493.265	1.00011	94.9368
27.5703	384.013	1856.39	5.85361	250.118	537.071	78.7515	41.574	26.569	493.249	1.00011	94.9523
27.6628	383.98	1856.37	5.84956	250.134	537.056	78.7504	41.5153	26.6625	493.232	1.00012	94.9678
27.7553	383.947	1856.35	5.8455	250.149	537.041	78.7493	41.4565	26.7563	493.216	1.00012	94.9833
27.8478	383.914	1856.33	5.84144	250.165	537.026	78.7481	41.3976	26.8504	493.199	1.00012	94.9988
27.9403	383.881	1856.31	5.83737	250.18	537.01	78.7469	41.3386	26.9447	493.183	1.00012	95.0143
28.0329	383.848	1856.29	5.8333	250.196	536.995	78.7457	41.2796	27.0393	493.167	1.00012	95.0298
28.1254	383.815	1856.27	5.82923	250.211	536.979	78.7444	41.2204	27.1341	493.151	1.00012	95.0454
28.2179	383.782	1856.25	5.82515	250.227	536.963	78.743	41.1612	27.2292	493.134	1.00012	95.0609
28.3104	383.749	1856.23	5.82107	250.242	536.947	78.7416	41.1018	27.3246	493.118	1.00012	95.0764
28.4029	383.716	1856.21	5.81698	250.257	536.931	78.7402	41.0424	27.4202	493.102	1.00012	95.0919
28.4955	383.683	1856.19	5.81289	250.273	536.915	78.7387	40.9829	27.516	493.086	1.00012	95.1074
28.588	383.65	1856.16	5.80879	250.288	536.898	78.7372	40.9233	27.6121	493.07	1.00012	95.123
28.6805	383.617	1856.14	5.80469	250.303	536.882	78.7357	40.8637	27.7085	493.054	1.00012	95.1385
28.773	383.584	1856.12	5.80058	250.318	536.865	78.7341	40.8039	27.8051	493.038	1.00012	95.154
28.8655	383.551	1856.09	5.79647	250.333	536.848	78.7324	40.7441	27.902	493.022	1.00012	95.1696
28.958	383.518	1856.07	5.79236	250.348	536.831	78.7308	40.6842	27.9991	493.006	1.00012	95.1851
29.0506	383.485	1856.04	5.78824	250.364	536.814	78.729	40.6242	28.0965	492.99	1.00012	95.2007
29.1431	383.452	1856.02	5.78412	250.379	536.796	78.7273	40.5641	28.1942	492.974	1.00012	95.2162
29.2356	383.419	1856	5.77999	250.394	536.779	78.7254	40.5039	28.2921	492.958	1.00012	95.2318
29.3281	383.386	1855.97	5.77586	250.409	536.761	78.7236	40.4437	28.3903	492.942	1.00012	95.2473
29.4206	383.354	1855.94	5.77172	250.424	536.743	78.7217	40.3833	28.4887	492.927	1.00012	95.2629
29.5131	383.321	1855.92	5.76758	250.438	536.725	78.7197	40.3229	28.5874	492.911	1.00012	95.2784
29.6057	383.288	1855.89	5.76343	250.453	536.707	78.7177	40.2624	28.6863	492.895	1.00012	95.294
29.6982	383.255	1855.86	5.75928	250.468	536.689	78.7157	40.2019	28.7855	492.88	1.00013	95.3095
29.7907	383.222	1855.84	5.75513	250.483	536.67	78.7136	40.1412	28.885	492.864	1.00013	95.3251
29.8832	383.189	1855.81	5.75097	250.498	536.652	78.7115	40.0805	28.9847	492.849	1.00013	95.3406
29.9757	383.157	1855.78	5.7468	250.512	536.633	78.7093	40.0197	29.0847	492.833	1.00013	95.3562
30.0683	383.124	1855.75	5.74263	250.527	536.614	78.7071	39.9588	29.185	492.818	1.00013	95.3718
30.1608	383.091	1855.73	5.73846	250.542	536.595	78.7048	39.8978	29.2855	492.803	1.00013	95.3873
30.2533	383.059	1855.7	5.73428	250.556	536.575	78.7025	39.8368	29.3863	492.787	1.00013	95.4029
30.3458	383.026	1855.67	5.7301	250.571	536.556	78.7001	39.7757	29.4873	492.772	1.00013	95.4185
30.4383	382.993	1855.64	5.72591	250.585	536.536	78.6977	39.7145	29.5886	492.757	1.00013	95.434
30.5308	382.961	1855.61	5.72172	250.6	536.517	78.6952	39.6532	29.6902	492.742	1.00013	95.4496
30.6234	382.928	1855.58	5.71752	250.614	536.497	78.6927	39.5919	29.792	492.727	1.00013	95.4651
30.7159	382.896	1855.55	5.71332	250.629	536.476	78.6902	39.5305	29.8941	492.712	1.00013	95.4807
30.8084	382.863	1855.52	5.70912	250.643	536.456	78.6876	39.469	29.9965	492.697	1.00013	95.4963
30.9009	382.831	1855.49	5.70491	250.657	536.436	78.6849	39.4074	30.0991	492.682	1.00013	95.5119
30.9934	382.799	1855.46	5.70069	250.672	536.415	78.6822	39.3458	30.202	492.667	1.00013	95.5274
31.0859	382.766	1855.43	5.69647	250.686	536.394	78.6794	39.2841	30.3051	492.653	1.00013	95.543
31.1785	382.734	1855.4	5.69225	250.7	536.373	78.6766	39.2223	30.4085	492.638	1.00013	95.5586
31.271	382.702	1855.36	5.68802	250.714	536.352	78.6738	39.1604	30.5122	492.624	1.00013	95.5741
31.3635	382.67	1855.33	5.68379	250.729	536.331	78.6709	39.0985	30.6162	492.609	1.00013	95.5897
31.456	382.637	1855.3	5.67955	250.743	536.31	78.6679	39.0365	30.7204	492.595	1.00013	95.6053
31.5485	382.605	1855.27	5.6753	250.757	536.288	78.6649	38.9744	30.8249	492.58	1.00013	95.6208
31.6411	382.573	1855.23	5.67106	250.771	536.266	78.6618	38.9123	30.9296	492.566	1.00013	95.6364
31.7336	382.541	1855.2	5.6668	250.785	536.244	78.6587	38.85	31.0346	492.552	1.00013	95.652
31.8261	382.509	1855.17	5.66255	250.798	536.222	78.6555	38.7878	31.1399	492.538	1.00014	95.6675
31.9186	382.477	1855.13	5.65828	250.812	536.2	78.6523	38.7254	31.2455	492.524	1.00014	95.6831
32.0111	382.445	1855.1	5.65402	250.826	536.177	78.649	38.663	31.3513	492.51	1.00014	95.6987
32.1036	382.413	1855.07	5.64975	250.84	536.155	78.6457	38.6005	31.4574	492.496	1.00014	95.7142
32.1962	382.382	1855.03	5.64547	250.854	536.132	78.6423	38.5379	31.5638	492.482	1.00014	95.7298
32.2887	382.35	1855	5.64119	250.867	536.109	78.6389	38.4753	31.6704	492.468	1.00014	95.7454
32.3812	382.318	1854.96	5.6369	250.881	536.086	78.6354	38.4125	31.7773	492.454	1.00014	95.7609
32.4737	382.287	1854.93	5.63261	250.895	536.062	78.6319	38.3498	31.8845	492.441	1.00014	95.7765
32.5662	382.255	1854.89	5.62832	250.908	536.039	78.6283	38.2869	31.9919	492.427	1.00014	95.7921
32.6587	382.223	1854.86	5.62402	250.922	536.015	78.6246	38.224	32.0996	492.414	1.00014	95.8076
32.7513	382.192	1854.82	5.61971	250.935	535.991	78.6209	38.161	32.2076	492.401	1.00014	95.8232
32.8438	382.16	1854.79	5.6154	250.949	535.967	78.6171	38.098	32.3159	492.387	1.00014	95.8387
32.9363	382.129	1854.75	5.61109	250.962	535.943	78.6133	38.0349	32.4244	492.374	1.00014	95.8543
33.0288	382.098	1854.71	5.60677	250.975	535.918	78.6094	37.9717	32.5332	492.361	1.00014	95.8699
33.1213	382.067	1854.68	5.60244	250.988	535.894	78.6055	37.9084	32.6423	492.348	1.00014	95.8854
33.2139	382.035	1854.64	5.59812	251.002	535.869	78.6015	37.8451	32.7516	492.335	1.00014	95.901
33.3064	382.004	1854.6	5.59378	251.015	535.844	78.5974	37.7817	32.8613	492.322	1.00014	95.9165
33.3989	381.973	1854.57	5.58944	251.028	535.819	78.5933	37.7183	32.9712	492.309	1.00014	95.9321
33.4914	381.942	1854.53	5.5851	251.041	535.793	78.5892	37.6548	33.0814	492.297	1.00014	95.9476
33.5839	381.911	1854.49	5.58075	251.054	535.768	78.5849	37.5912	33.1918	492.284	1.00014	95.9632
33.6764	381.88	1854.45	5.57639	251.067	535.742	78.5807	37.5275	33.3025	492.271	1.00014	95.9787
33.769	381.849	1854.42	5.57204	251.08	535.716	78.5763	37.4638	33.4136	492.259	1.00014	95.9943
33.8615	381.818	1854.38	5.56767	251.093	535.69	78.5719	37.4001	33.5248	492.247	1.00014	96.0098
33.954	381.788	1854.34	5.5633	251.106	535.664	78.5674	37.3362	33.6364	492.234	1.00015	96.0254
34.0465	381.757	1854.3	5.55893	251.118	535.637	78.5629	37.2723	33.7482	492.222	1.00015	96.0409
34.139	381.726	1854.26	5.55455	251.131	535.611	78.5583	37.2084	33.8604	492.21	1.00015	96.0564
34.2315	381.696	1854.22	5.55017	251.144	535.584	78.5537	37.1443	33.9728	492.198	1.00015	96.072
34.3241	381.665	1854.19	5.54578	251.156	535.557	78.549	37.0802	34.0854	492.186	1.00015	96.0875
34.4166	381.635	1854.15	5.54138	251.169	535.53	78.5442	37.0161	34.1984	492.174	1.00015	96.103
34.5091	381.604	1854.11	5.53698	251.181	535.502	78.5394	36.9518	34.3116	492.163	1.00015	96.1186
34.6016	381.574	1854.07	5.53258	251.194	535.474	78.5345	36.8876	34.4251	492.151	1.00015	96.1341
34.6941	381.544	1854.03	5.52817	251.206	535.447	78.5295	36.8232	34.5389	492.139	1.00015	96.1496
34.7867	381.514	1853.99	5.52376	251.219	535.419	78.5245	36.7588	34.653	492.128	1.00015	96.1651
34.8792	381.483	1853.95	5.51934	251.231	535.39	78.5194	36.6943	34.7674	492.117	1.00015	96.1807
34.9717	381.453	1853.91	5.51491	251.243	535.362	78.5142	36.6298	34.882	492.105	1.00015	96.1962
35.0642	381.423	1853.87	5.51048	251.255	535.333	78.509	36.5652	34.9969	492.094	1.00015	96.2117
35.1567	381.393	1853.83	5.50605	251.267	535.305	78.5037	36.5005	35.1122	492.083	1.00015	96.2272
35.2492	381.363	1853.79	5.50161	251.279	535.275	78.4984	36.4358	35.2276	492.072	1.00015	96.2427
35.3418	381.334	1853.75	5.49716	251.291	535.246	78.493	36.371	35.3434	492.061	1.00015	96.2582
35.4343	381.304	1853.71	5.49271	251.303	535.217	78.4875	36.3062	35.4595	492.05	1.00015	96.2737
35.5268	381.274	1853.67	5.48825	251.315	535.187	78.482	36.2413	35.5758	492.04	1.00015	96.2892
35.6193	381.244	1853.63	5.48379	251.327	535.157	78.4763	36.1763	35.6925	492.029	1.00015	96.3047
35.7118	381.215	1853.59	5.47933	251.339	535.127	78.4707	36.1112	35.8094	492.018	1.00015	96.3202
35.8043	381.185	1853.55	5.47485	251.35	535.097	78.4649	36.0462	35.9266	492.008	1.00015	96.3357
35.8969	381.156	1853.51	5.47038	251.362	535.067	78.4591	35.981	36.0441	491.998	1.00015	96.3512
35.9894	381.126	1853.46	5.4659	251.374	535.036	78.4532	35.9158	36.1619	491.987	1.00016	96.3667
36.0819	381.097	1853.42	5.46141	251.385	535.005	78.4473	35.8505	36.2799	491.977	1.00016	96.3822
36.1744	381.068	1853.38	5.45691	251.397	534.974	78.4412	35.7852	36.3983	491.967	1.00016	96.3976
36.2669	381.038	1853.34	5.45242	251.408	534.943	78.4351	35.7198	36.5169	491.957	1.00016	96.4131
36.3595	381.009	1853.3	5.44791	251.419	534.911	78.429	35.6543	36.6359	491.947	1.00016	96.4286
36.452	380.98	1853.26	5.4434	251.431	534.88	78.4228	35.5888	36.7551	491.938	1.00016	96.4441
36.5445	380.951	1853.22	5.43889	251.442	534.848	78.4165	35.5232	36.8746	491.928	1.00016	96.4595
36.637	380.922	1853.17	5.43437	251.453	534.815	78.4101	35.4576	36.9944	491.918	1.00016	96.475
36.7295	380.893	1853.13	5.42984	251.464	534.783	78.4036	35.3919	37.1145	491.909	1.00016	96.4904
36.822	380.864	1853.09	5.42531	251.475	534.751	78.3971	35.3261	37.2349	491.9	1.00016	96.5059
36.9146	380.835	1853.05	5.42078	251.486	534.718	78.3905	35.2603	37.3556	491.89	1.00016	96.5213
37.0071	380.807	1853.01	5.41624	251.497	534.685	78.3839	35.1944	37.4765	491.881	1.00016	96.5368
37.0996	380.778	1852.96	5.41169	251.507	534.651	78.3771	35.1285	37.5978	491.872	1.00016	96.5522
37.1921	380.749	1852.92	5.40714	251.518	534.618	78.3703	35.0625	37.7194	491.863	1.00016	96.5677
37.2846	380.721	1852.88	5.40258	251.529	534.584	78.3634	34.9964	37.8412	491.854	1.00016	96.5831
37.3772	380.692	1852.84	5.39802	251.539	534.55	78.3565	34.9303	37.9634	491.845	1.00016	96.5985
37.4697	380.664	1852.8	5.39345	251.55	534.516	78.3494	34.8641	38.0858	491.837	1.00016	96.614
37.5622	380.635	1852.75	5.38887	251.56	534.482	78.3423	34.7979	38.2085	491.828	1.00016	96.6294
37.6547	380.607	1852.71	5.38429	251.571	534.447	78.3352	34.7316	38.3316	491.819	1.00016	96.6448
37.7472	380.579	1852.67	5.37971	251.581	534.413	78.3279	34.6652	38.4549	491.811	1.00016	96.6602
37.8397	380.551	1852.63	5.37511	251.591	534.378	78.3206	34.5988	38.5785	491.803	1.00016	96.6756
37.9323	380.522	1852.58	5.37052	251.602	534.342	78.3131	34.5324	38.7025	491.795	1.00016	96.691
38.0248	380.494	1852.54	5.36591	251.612	534.307	78.3057	34.4658	38.8267	491.786	1.00016	96.7064
38.1173	380.466	1852.5	5.36131	251.622	534.271	78.2981	34.3992	38.9512	491.778	1.00017	96.7218
38.2098	380.438	1852.46	5.35669	251.632	534.235	78.2904	34.3326	39.076	491.77	1.00017	96.7372
38.3023	380.41	1852.41	5.35207	251.642	534.199	78.2827	34.2659	39.2012	491.763	1.00017	96.7526
38.3948	380.382	1852.37	5.34745	251.651	534.163	78.2749	34.1991	39.3266	491.755	1.00017	96.768
38.4874	380.355	1852.33	5.34282	251.661	534.126	78.267	34.1323	39.4523	491.747	1.00017	96.7834
38.5799	380.327	1852.28	5.33818	251.671	534.089	78.2591	34.0654	39.5783	491.74	1.00017	96.7987
38.6724	380.299	1852.24	5.33354	251.68	534.052	78.251	33.9984	39.7047	491.732	1.00017	96.8141
38.7649	380.271	1852.2	5.32889	251.69	534.015	78.2429	33.9314	39.8313	491.725	1.00017	96.8295
38.8574	380.244	1852.16	5.32423	251.699	533.977	78.2347	33.8643	39.9582	491.718	1.00017	96.8448
38.95	380.216	1852.11	5.31957	251.709	533.939	78.2264	33.7972	40.0855	491.711	1.00017	96.8602
39.0425	380.189	1852.07	5.31491	251.718	533.901	78.218	33.73	40.213	491.704	1.00017	96.8755
39.135	380.161	1852.03	5.31024	251.727	533.863	78.2096	33.6628	40.3409	491.697	1.00017	96.8909
39.2275	380.134	1851.98	5.30556	251.736	533.824	78.201	33.5955	40.469	491.69	1.00017	96.9062
39.32	380.106	1851.94	5.30087	251.745	533.785	78.1924	33.5281	40.5975	491.683	1.00017	96.9215
39.4125	380.079	1851.9	5.29619	251.754	533.746	78.1837	33.4607	40.7262	491.676	1.00017	96.9369
39.5051	380.052	1851.86	5.29149	251.763	533.707	78.1749	33.3932	40.8553	491.67	1.00017	96.9522
39.5976	380.024	1851.81	5.28679	251.772	533.668	78.1661	33.3257	40.9847	491.663	1.00017	96.9675
39.6901	379.997	1851.77	5.28208	251.78	533.628	78.1571	33.2581	41.1144	491.657	1.00017	96.9828
39.7826	379.97	1851.73	5.27737	251.789	533.588	78.1481	33.1904	41.2443	491.65	1.00017	96.9981
39.8751	379.943	1851.68	5.27265	251.798	533.547	78.1389	33.1227	41.3746	491.644	1.00017	97.0134
39.9676	379.916	1851.64	5.26792	251.806	533.507	78.1297	33.0549	41.5053	491.638	1.00017	97.0287
40.0602	379.889	1851.6	5.26319	251.814	533.466	78.1204	32.9871	41.6362	491.632	1.00017	97.044
40.1527	379.862	1851.56	5.25846	251.823	533.425	78.111	32.9192	41.7674	491.626	1.00017	97.0593
40.2452	379.835	1851.51	5.25371	251.831	533.384	78.1016	32.8513	41.8989	491.62	1.00018	97.0745
40.3377	379.808	1851.47	5.24896	251.839	533.342	78.092	32.7832	42.0308	491.615	1.00018	97.0898
40.4302	379.781	1851.43	5.24421	251.847	533.3	78.0823	32.7152	42.163	491.609	1.00018	97.1051
40.5228	379.755	1851.39	5.23945	251.855	533.258	78.0726	32.647	42.2954	491.603	1.00018	97.1203
40.6153	379.728	1851.34	5.23468	251.863	533.216	78.0628	32.5788	42.4282	491.598	1.00018	97.1356
40.7078	379.701	1851.3	5.2299	251.871	533.173	78.0528	32.5106	42.5613	491.592	1.00018	97.1508
40.8003	379.674	1851.26	5.22512	251.878	533.13	78.0428	32.4423	42.6947	491.587	1.00018	97.1661
40.8928	379.648	1851.22	5.22034	251.886	533.087	78.0327	32.3739	42.8285	491.582	1.00018	97.1813
40.9853	379.621	1851.17	5.21555	251.893	533.044	78.0225	32.3055	42.9625	491.577	1.00018	97.1965
41.0779	379.595	1851.13	5.21075	251.901	533	78.0122	32.237	43.0969	491.572	1.00018	97.2117
41.1704	379.568	1851.09	5.20594	251.908	532.956	78.0018	32.1685	43.2315	491.567	1.00018	97.2269
41.2629	379.542	1851.05	5.20113	251.915	532.912	77.9914	32.0998	43.3665	491.562	1.00018	97.2421
41.3554	379.515	1851	5.19631	251.922	532.867	77.9808	32.0312	43.5019	491.557	1.00018	97.2573
41.4479	379.489	1850.96	5.19149	251.929	532.823	77.9701	31.9625	43.6375	491.552	1.00018	97.2725
41.5404	379.462	1850.92	5.18666	251.936	532.778	77.9594	31.8937	43.7734	491.548	1.00018	97.2877
41.633	379.436	1850.88	5.18182	251.943	532.732	77.9485	31.8248	43.9097	491.543	1.00018	97.3029
41.7255	379.41	1850.84	5.17698	251.95	532.687	77.9376	31.7559	44.0463	491.539	1.00018	97.318
41.818	379.383	1850.79	5.17213	251.957	532.641	77.9265	31.6869	44.1832	491.535	1.00018	97.3332
41.9105	379.357	1850.75	5.16727	251.963	532.595	77.9154	31.6179	44.3204	491.53	1.00018	97.3484
42.003	379.331	1850.71	5.16241	251.97	532.548	77.9042	31.5488	44.458	491.526	1.00018	97.3635
42.0956	379.305	1850.67	5.15754	251.976	532.502	77.8928	31.4797	44.5958	491.522	1.00018	97.3786
42.1881	379.278	1850.63	5.15267	251.982	532.455	77.8814	31.4105	44.734	491.518	1.00018	97.3938
42.2806	379.252	1850.59	5.14779	251.988	532.407	77.8699	31.3412	44.8725	491.514	1.00019	97.4089
42.3731	379.226	1850.54	5.1429	251.994	532.36	77.8582	31.2719	45.0114	491.51	1.00019	97.424
42.4656	379.2	1850.5	5.138	252	532.312	77.8465	31.2025	45.1505	491.506	1.00019	97.4391
42.5581	379.174	1850.46	5.1331	252.006	532.264	77.8347	31.1331	45.29	491.503	1.00019	97.4542
42.6507	379.148	1850.42	5.1282	252.012	532.215	77.8227	31.0635	45.4298	491.499	1.00019	97.4693
42.7432	379.122	1850.38	5.12328	252.018	532.167	77.8107	30.994	45.5699	491.495	1.00019	97.4844
42.8357	379.096	1850.34	5.11836	252.023	532.118	77.7986	30.9243	45.7104	491.492	1.00019	97.4995
42.9282	379.07	1850.3	5.11343	252.029	532.068	77.7863	30.8547	45.8512	491.488	1.00019	97.5145
43.0207	379.044	1850.26	5.1085	252.034	532.019	77.774	30.7849	45.9923	491.485	1.00019	97.5296
43.1132	379.018	1850.22	5.10356	252.039	531.969	77.7616	30.7151	46.1337	491.482	1.00019	97.5446
43.2058	378.992	1850.17	5.09861	252.044	531.919	77.749	30.6452	46.2755	491.479	1.00019	97.5597
43.2983	378.966	1850.13	5.09366	252.049	531.868	77.7364	30.5753	46.4176	491.476	1.00019	97.5747
43.3908	378.94	1850.09	5.08869	252.054	531.817	77.7236	30.5053	46.56	491.473	1.00019	97.5897
43.4833	378.914	1850.05	5.08373	252.059	531.766	77.7108	30.4352	46.7028	491.47	1.00019	97.6047
43.5758	378.888	1850.01	5.07875	252.064	531.715	77.6978	30.3651	46.8459	491.467	1.00019	97.6198
43.6684	378.862	1849.97	5.07377	252.068	531.663	77.6847	30.2949	46.9893	491.464	1.00019	97.6347
43.7609	378.836	1849.93	5.06878	252.073	531.611	77.6715	30.2247	47.133	491.461	1.00019	97.6497
43.8534	378.81	1849.89	5.06379	252.077	531.559	77.6583	30.1544	47.2771	491.458	1.00019	97.6647
43.9459	378.784	1849.85	5.05878	252.081	531.506	77.6449	30.084	47.4215	491.456	1.00019	97.6797
44.0384	378.758	1849.81	5.05378	252.086	531.453	77.6314	30.0136	47.5663	491.453	1.00019	97.6946
44.1309	378.733	1849.77	5.04876	252.09	531.4	77.6178	29.9431	47.7113	491.451	1.00019	97.7096
44.2235	378.707	1849.73	5.04374	252.093	531.347	77.604	29.8726	47.8567	491.448	1.00019	97.7245
44.316	378.681	1849.69	5.03871	252.097	531.293	77.5902	29.802	48.0025	491.446	1.00019	97.7395
44.4085	378.655	1849.65	5.03367	252.101	531.239	77.5763	29.7313	48.1486	491.443	1.0002	97.7544
44.501	378.629	1849.62	5.02863	252.104	531.184	77.5622	29.6606	48.295	491.441	1.0002	97.7693
44.5935	378.603	1849.58	5.02358	252.108	531.129	77.548	29.5898	48.4417	491.439	1.0002	97.7842
44.686	378.577	1849.54	5.01852	252.111	531.074	77.5338	29.5189	48.5888	491.437	1.0002	97.7991
44.7786	378.552	1849.5	5.01345	252.114	531.019	77.5194	29.448	48.7362	491.435	1.0002	97.814
44.8711	378.526	1849.46	5.00838	252.117	530.963	77.5049	29.377	48.884	491.433	1.0002	97.8288
44.9636	378.5	1849.42	5.0033	252.12	530.907	77.4903	29.306	49.0321	491.431	1.0002	97.8437
45.0561	378.474	1849.38	4.99821	252.123	530.85	77.4755	29.2349	49.1805	491.429	1.0002	97.8585
45.1486	378.448	1849.34	4.99312	252.126	530.794	77.4607	29.1637	49.3293	491.427	1.0002	97.8734
45.2412	378.422	1849.31	4.98802	252.129	530.737	77.4457	29.0925	49.4784	491.425	1.0002	97.8882
45.3337	378.396	1849.27	4.98291	252.131	530.679	77.4306	29.0212	49.6279	491.424	1.0002	97.903
45.4262	378.37	1849.23	4.9778	252.133	530.621	77.4154	28.9499	49.7777	491.422	1.0002	97.9178
45.5187	378.345	1849.19	4.97267	252.136	530.563	77.4001	28.8785	49.9278	491.42	1.0002	97.9326
45.6112	378.319	1849.15	4.96754	252.138	530.505	77.3847	28.807	50.0783	491.419	1.0002	97.9474
45.7037	378.293	1849.12	4.96241	252.14	530.446	77.3692	28.7354	50.2291	491.417	1.0002	97.9622
45.7963	378.267	1849.08	4.95726	252.141	530.387	77.3535	28.6638	50.3803	491.416	1.0002	97.9769
45.8888	378.241	1849.04	4.95211	252.143	530.328	77.3377	28.5922	50.5318	491.414	1.0002	97.9917
45.9813	378.215	1849	4.94695	252.145	530.268	77.3218	28.5204	50.6837	491.413	1.0002	98.0064
46.0738	378.189	1848.97	4.94178	252.146	530.208	77.3057	28.4487	50.8359	491.412	1.0002	98.0212
46.1663	378.163	1848.93	4.93661	252.147	530.147	77.2896	28.3768	50.9884	491.41	1.0002	98.0359
46.2588	378.137	1848.89	4.93143	252.149	530.086	77.2733	28.3049	51.1413	491.409	1.0002	98.0506
46.3514	378.111	1848.86	4.92624	252.15	530.025	77.2569	28.2329	51.2945	491.408	1.0002	98.0653
46.4439	378.085	1848.82	4.92104	252.151	529.964	77.2404	28.1609	51.4481	491.407	1.0002	98.0799
46.5364	378.059	1848.78	4.91584	252.151	529.902	77.2237	28.0888	51.602	491.406	1.00021	98.0946
46.6289	378.033	1848.75	4.91062	252.152	529.84	77.207	28.0166	51.7563	491.405	1.00021	98.1093
46.7214	378.006	1848.71	4.9054	252.152	529.777	77.1901	27.9444	51.9109	491.404	1.00021	98.1239
46.814	377.98	1848.68	4.90018	252.153	529.714	77.173	27.8721	52.0659	491.403	1.00021	98.1385
46.9065	377.954	1848.64	4.89494	252.153	529.651	77.1559	27.7997	52.2212	491.402	1.00021	98.1532
46.999	377.928	1848.6	4.8897	252.153	529.587	77.1386	27.7273	52.3769	491.401	1.00021	98.1678
47.0915	377.902	1848.57	4.88445	252.153	529.523	77.1212	27.6548	52.5329	491.4	1.00021	98.1823
47.184	377.875	1848.53	4.87919	252.153	529.459	77.1037	27.5822	52.6893	491.399	1.00021	98.1969
47.2765	377.849	1848.5	4.87392	252.153	529.394	77.086	27.5096	52.846	491.398	1.00021	98.2115
47.3691	377.823	1848.46	4.86865	252.152	529.329	77.0682	27.437	53.0031	491.398	1.00021	98.226
47.4616	377.796	1848.43	4.86337	252.151	529.263	77.0503	27.3642	53.1605	491.397	1.00021	98.2406
47.5541	377.77	1848.39	4.85808	252.151	529.197	77.0322	27.2914	53.3183	491.396	1.00021	98.2551
47.6466	377.744	1848.36	4.85278	252.15	529.131	77.014	27.2185	53.4764	491.396	1.00021	98.2696
47.7391	377.717	1848.32	4.84747	252.149	529.064	76.9957	27.1456	53.6349	491.395	1.00021	98.2841
47.8316	377.691	1848.29	4.84216	252.147	528.997	76.9772	27.0726	53.7937	491.394	1.00021	98.2986
47.9242	377.664	1848.25	4.83684	252.146	528.93	76.9586	26.9996	53.9529	491.394	1.00021	98.313
48.0167	377.638	1848.22	4.83151	252.145	528.862	76.9399	26.9264	54.1125	491.393	1.00021	98.3275
48.1092	377.611	1848.19	4.82617	252.143	528.794	76.921	26.8532	54.2724	491.393	1.00021	98.3419
48.2017	377.584	1848.15	4.82082	252.141	528.726	76.902	26.78	54.4326	491.392	1.00021	98.3563
48.2942	377.558	1848.12	4.81547	252.139	528.657	76.8828	26.7067	54.5933	491.392	1.00021	98.3708
48.3868	377.531	1848.09	4.81011	252.137	528.587	76.8636	26.6333	54.7542	491.391	1.00021	98.3851
48.4793	377.504	1848.05	4.80474	252.135	528.518	76.8441	26.5598	54.9156	491.391	1.00021	98.3995
48.5718	377.477	1848.02	4.79936	252.132	528.448	76.8246	26.4863	55.0773	491.391	1.00021	98.4139
48.6643	377.45	1847.99	4.79397	252.13	528.377	76.8049	26.4128	55.2393	491.39	1.00022	98.4282
48.7568	377.424	1847.95	4.78857	252.127	528.306	76.785	26.3391	55.4017	491.39	1.00022	98.4426
48.8493	377.397	1847.92	4.78317	252.124	528.235	76.765	26.2654	55.5645	491.39	1.00022	98.4569
48.9419	377.37	1847.89	4.77776	252.121	528.163	76.7449	26.1916	55.7276	491.389	1.00022	98.4712
49.0344	377.342	1847.85	4.77234	252.118	528.091	76.7246	26.1178	55.8911	491.389	1.00022	98.4855
49.1269	377.315	1847.82	4.76691	252.114	528.019	76.7042	26.0439	56.055	491.389	1.00022	98.4997
49.2194	377.288	1847.79	4.76147	252.111	527.946	76.6836	25.97	56.2192	491.389	1.00022	98.514
49.3119	377.261	1847.76	4.75602	252.107	527.872	76.6629	25.8959	56.3838	491.389	1.00022	98.5282
49.4045	377.234	1847.73	4.75057	252.103	527.799	76.6421	25.8218	56.5487	491.388	1.00022	98.5424
49.497	377.206	1847.69	4.7451	252.099	527.725	76.6211	25.7477	56.714	491.388	1.00022	98.5566
49.5895	377.179	1847.66	4.73963	252.095	527.65	76.5999	25.6734	56.8797	491.388	1.00022	98.5708
49.682	377.152	1847.63	4.73415	252.09	527.575	76.5786	25.5992	57.0458	491.388	1.00022	98.585
49.7745	377.124	1847.6	4.72866	252.086	527.5	76.5571	25.5248	57.2122	491.388	1.00022	98.5991
49.867	377.097	1847.57	4.72316	252.081	527.424	76.5355	25.4504	57.3789	491.388	1.00022	98.6132
49.9596	377.069	1847.54	4.71766	252.076	527.347	76.5138	25.3759	57.5461	491.388	1.00022	98.6274
50.0521	377.041	1847.51	4.71214	252.071	527.271	76.4918	25.3013	57.7136	491.387	1.00022	98.6415
50.1446	377.013	1847.48	4.70662	252.066	527.194	76.4698	25.2267	57.8815	491.387	1.00022	98.6555
50.2371	376.986	1847.44	4.70108	252.06	527.116	76.4475	25.1521	58.0497	491.387	1.00022	98.6696
50.3296	376.958	1847.41	4.69554	252.055	527.038	76.4252	25.0773	58.2183	491.387	1.00022	98.6836
50.4221	376.93	1847.38	4.68999	252.049	526.96	76.4026	25.0025	58.3873	491.387	1.00022	98.6976
50.5147	376.902	1847.35	4.68443	252.043	526.881	76.3799	24.9276	58.5566	491.387	1.00022	98.7117
50.6072	376.874	1847.32	4.67885	252.037	526.801	76.3571	24.8527	58.7264	491.387	1.00022	98.7256
50.6997	376.846	1847.29	4.67328	252.03	526.722	76.334	24.7776	58.8965	491.387	1.00022	98.7396
50.7922	376.817	1847.26	4.66769	252.024	526.642	76.3109	24.7026	59.0669	491.387	1.00023	98.7535
50.8847	376.789	1847.23	4.66209	252.017	526.561	76.2875	24.6274	59.2378	491.387	1.00023	98.7675
50.9773	376.761	1847.2	4.65648	252.01	526.48	76.264	24.5522	59.409	491.387	1.00023	98.7814
51.0698	376.732	1847.18	4.65086	252.003	526.398	76.2403	24.4769	59.5806	491.387	1.00023	98.7953
51.1623	376.704	1847.15	4.64524	251.996	526.316	76.2165	24.4016	59.7526	491.387	1.00023	98.8091
51.2548	376.675	1847.12	4.6396	251.988	526.234	76.1925	24.3262	59.9249	491.387	1.00023	98.823
51.3473	376.647	1847.09	4.63396	251.981	526.151	76.1683	24.2507	60.0976	491.387	1.00023	98.8368
51.4398	376.618	1847.06	4.6283	251.973	526.067	76.144	24.1751	60.2707	491.387	1.00023	98.8506
51.5324	376.589	1847.03	4.62264	251.965	525.983	76.1195	24.0995	60.4442	491.387	1.00023	98.8644
51.6249	376.561	1847	4.61697	251.956	525.899	76.0948	24.0239	60.6181	491.387	1.00023	98.8781
51.7174	376.532	1846.97	4.61128	251.948	525.814	76.07	23.9481	60.7923	491.387	1.00023	98.8919
51.8099	376.503	1846.94	4.60559	251.939	525.729	76.045	23.8723	60.9669	491.387	1.00023	98.9056
51.9024	376.473	1846.92	4.59988	251.93	525.643	76.0198	23.7964	61.1419	491.388	1.00023	98.9193
51.9949	376.444	1846.89	4.59417	251.921	525.557	75.9944	23.7205	61.3173	491.388	1.00023	98.9329
52.0875	376.415	1846.86	4.58845	251.912	525.47	75.9688	23.6444	61.493	491.388	1.00023	98.9466
52.18	376.386	1846.83	4.58271	251.902	525.382	75.9431	23.5683	61.6692	491.388	1.00023	98.9602
52.2725	376.356	1846.8	4.57697	251.893	525.295	75.9172	23.4922	61.8457	491.388	1.00023	98.9738
52.365	376.327	1846.78	4.57122	251.883	525.206	75.8911	23.416	62.0226	491.388	1.00023	98.9874
52.4575	376.297	1846.75	4.56545	251.873	525.118	75.8649	23.3397	62.1999	491.388	1.00023	99.001
52.5501	376.268	1846.72	4.55968	251.862	525.028	75.8384	23.2633	62.3776	491.388	1.00023	99.0145
52.6426	376.238	1846.69	4.55389	251.852	524.938	75.8118	23.1869	62.5557	491.388	1.00023	99.028
52.7351	376.208	1846.67	4.5481	251.841	524.848	75.785	23.1104	62.7342	491.388	1.00023	99.0415
52.8276	376.178	1846.64	4.54229	251.83	524.757	75.758	23.0338	62.913	491.388	1.00024	99.0549
52.9201	376.148	1846.61	4.53648	251.819	524.666	75.7308	22.9571	63.0923	491.388	1.00024	99.0684
53.0126	376.118	1846.59	4.53065	251.807	524.574	75.7034	22.8804	63.2719	491.388	1.00024	99.0818
53.1052	376.088	1846.56	4.52481	251.796	524.482	75.6758	22.8036	63.452	491.388	1.00024	99.0952
53.1977	376.058	1846.53	4.51896	251.784	524.389	75.648	22.7268	63.6324	491.388	1.00024	99.1085
53.2902	376.027	1846.5	4.5131	251.772	524.295	75.6201	22.6498	63.8132	491.388	1.00024	99.1219
53.3827	375.997	1846.48	4.50723	251.759	524.201	75.5919	22.5728	63.9944	491.388	1.00024	99.1352
53.4752	375.966	1846.45	4.50135	251.747	524.106	75.5636	22.4958	64.1761	491.388	1.00024	99.1485
53.5677	375.936	1846.43	4.49546	251.734	524.011	75.535	22.4186	64.3581	491.389	1.00024	99.1617
53.6603	375.905	1846.4	4.48955	251.721	523.916	75.5063	22.3414	64.5405	491.389	1.00024	99.1749
53.7528	375.874	1846.37	4.48364	251.707	523.819	75.4773	22.2641	64.7233	491.389	1.00024	99.1881
53.8453	375.843	1846.35	4.47771	251.694	523.722	75.4482	22.1867	64.9066	491.389	1.00024	99.2013
53.9378	375.812	1846.32	4.47177	251.68	523.625	75.4188	22.1093	65.0902	491.389	1.00024	99.2145
54.0303	375.781	1846.3	4.46582	251.666	523.527	75.3892	22.0318	65.2742	491.389	1.00024	99.2276
54.1229	375.75	1846.27	4.45986	251.652	523.428	75.3595	21.9542	65.4587	491.389	1.00024	99.2407
54.2154	375.718	1846.24	4.45389	251.637	523.329	75.3295	21.8765	65.6436	491.389	1.00024	99.2537
54.3079	375.687	1846.22	4.4479	251.622	523.23	75.2993	21.7988	65.8288	491.389	1.00024	99.2668
54.4004	375.655	1846.19	4.4419	251.607	523.129	75.2689	21.7209	66.0145	491.389	1.00024	99.2798
54.4929	375.624	1846.17	4.43589	251.592	523.028	75.2382	21.643	66.2006	491.389	1.00024	99.2927
54.5854	375.592	1846.14	4.42987	251.577	522.927	75.2074	21.5651	66.3871	491.389	1.00024	99.3057
54.678	375.56	1846.12	4.42383	251.561	522.825	75.1763	21.487	66.5741	491.389	1.00024	99.3186
54.7705	375.528	1846.09	4.41779	251.545	522.722	75.145	21.4089	66.7615	491.389	1.00024	99.3315
54.863	375.496	1846.07	4.41173	251.528	522.618	75.1135	21.3306	66.9492	491.389	1.00024	99.3443
54.9555	375.464	1846.04	4.40565	251.512	522.514	75.0818	21.2523	67.1375	491.389	1.00025	99.3571
55.048	375.432	1846.02	4.39957	251.495	522.41	75.0498	21.174	67.3261	491.389	1.00025	99.3699
55.1405	375.399	1845.99	4.39347	251.477	522.304	75.0176	21.0955	67.5152	491.389	1.00025	99.3827
55.2331	375.367	1845.96	4.38735	251.46	522.198	74.9852	21.0169	67.7047	491.389	1.00025	99.3954
55.3256	375.334	1845.94	4.38123	251.442	522.092	74.9525	20.9383	67.8946	491.389	1.00025	99.4081
55.4181	375.301	1845.92	4.37509	251.424	521.984	74.9196	20.8596	68.085	491.389	1.00025	99.4208
55.5106	375.269	1845.89	4.36893	251.406	521.876	74.8864	20.7808	68.2758	491.389	1.00025	99.4334
55.6031	375.236	1845.87	4.36276	251.387	521.768	74.853	20.7019	68.4671	491.389	1.00025	99.446
55.6957	375.203	1845.84	4.35658	251.368	521.658	74.8194	20.6229	68.6588	491.39	1.00025	99.4585
55.7882	375.169	1845.82	4.35038	251.349	521.548	74.7855	20.5438	68.851	491.39	1.00025	99.4711
55.8807	375.136	1845.79	4.34417	251.329	521.437	74.7514	20.4646	69.0436	491.39	1.00025	99.4835
55.9732	375.103	1845.77	4.33795	251.309	521.326	74.717	20.3854	69.2367	491.39	1.00025	99.496
56.0657	375.069	1845.74	4.33171	251.289	521.214	74.6823	20.306	69.4302	491.39	1.00025	99.5084
56.1582	375.035	1845.72	4.32545	251.269	521.101	74.6474	20.2266	69.6243	491.39	1.00025	99.5208
56.2508	375.002	1845.69	4.31918	251.248	520.987	74.6122	20.147	69.8187	491.39	1.00025	99.5331
56.3433	374.968	1845.67	4.31289	251.227	520.873	74.5768	20.0674	70.0137	491.39	1.00025	99.5454
56.4358	374.934	1845.64	4.30659	251.205	520.757	74.541	19.9876	70.2091	491.39	1.00025	99.5577
56.5283	374.899	1845.62	4.30027	251.183	520.641	74.505	19.9078	70.4051	491.39	1.00025	99.5699
56.6208	374.865	1845.59	4.29393	251.161	520.525	74.4688	19.8278	70.6015	491.391	1.00025	99.5821
56.7133	374.831	1845.57	4.28758	251.139	520.407	74.4322	19.7477	70.7984	491.391	1.00025	99.5943
56.8059	374.796	1845.54	4.28121	251.116	520.289	74.3953	19.6675	70.9958	491.391	1.00025	99.6064
56.8984	374.761	1845.52	4.27482	251.093	520.169	74.3582	19.5872	71.1937	491.391	1.00025	99.6184
56.9909	374.727	1845.5	4.26841	251.069	520.049	74.3208	19.5068	71.3921	491.391	1.00025	99.6305
57.0834	374.692	1845.47	4.26199	251.045	519.928	74.283	19.4263	71.5911	491.392	1.00026	99.6425
57.1759	374.656	1845.45	4.25555	251.021	519.807	74.245	19.3457	71.7906	491.392	1.00026	99.6544
57.2685	374.621	1845.42	4.24909	250.996	519.684	74.2066	19.2649	71.9906	491.392	1.00026	99.6663
57.361	374.586	1845.4	4.24261	250.971	519.56	74.168	19.184	72.1912	491.392	1.00026	99.6782
57.4535	374.55	1845.37	4.23611	250.945	519.436	74.129	19.103	72.3923	491.393	1.00026	99.69
57.546	374.514	1845.35	4.22959	250.919	519.31	74.0897	19.0218	72.5939	491.393	1.00026	99.7018
57.6385	374.479	1845.32	4.22305	250.893	519.184	74.05	18.9405	72.7962	491.393	1.00026	99.7135
57.731	374.443	1845.3	4.21648	250.866	519.056	74.01	18.8591	72.999	491.394	1.00026	99.7252
57.8236	374.406	1845.27	4.2099	250.839	518.928	73.9697	18.7775	73.2024	491.394	1.00026	99.7368
57.9161	374.37	1845.25	4.20329	250.812	518.799	73.929	18.6957	73.4064	491.395	1.00026	99.7484
58.0086	374.333	1845.22	4.19667	250.783	518.668	73.888	18.6139	73.611	491.395	1.00026	99.7599
58.1011	374.297	1845.2	4.19001	250.755	518.537	73.8465	18.5318	73.8163	491.396	1.00026	99.7714
58.1936	374.26	1845.17	4.18334	250.726	518.404	73.8048	18.4496	74.0222	491.396	1.00026	99.7829
58.2861	374.223	1845.15	4.17664	250.697	518.27	73.7626	18.3672	74.2287	491.397	1.00026	99.7943
58.3787	374.185	1845.12	4.16991	250.667	518.136	73.72	18.2846	74.4359	491.397	1.00026	99.8056
58.4712	374.148	1845.1	4.16316	250.636	518	73.6771	18.2019	74.6438	491.398	1.00026	99.8169
58.5637	374.11	1845.07	4.15638	250.605	517.862	73.6337	18.119	74.8524	491.399	1.00026	99.8281
58.6562	374.072	1845.04	4.14957	250.574	517.724	73.5899	18.0358	75.0617	491.399	1.00026	99.8393
58.7487	374.034	1845.02	4.14274	250.542	517.584	73.5456	17.9525	75.2718	491.4	1.00026	99.8504
58.8413	373.996	1844.99	4.13587	250.509	517.443	73.501	17.8689	75.4826	491.401	1.00026	99.8615
58.9338	373.958	1844.97	4.12898	250.476	517.301	73.4558	17.7851	75.6943	491.402	1.00026	99.8725
59.0263	373.919	1844.94	4.12205	250.442	517.157	73.4102	17.7011	75.9067	491.403	1.00026	99.8835
59.1188	373.88	1844.91	4.11509	250.408	517.012	73.3641	17.6168	76.12	491.404	1.00026	99.8944
59.2113	373.841	1844.89	4.10809	250.373	516.865	73.3175	17.5323	76.3341	491.405	1.00027	99.9053
59.3038	373.801	1844.86	4.10106	250.338	516.717	73.2704	17.4475	76.5491	491.406	1.00027	99.916
59.3964	373.762	1844.83	4.09399	250.301	516.567	73.2228	17.3624	76.7651	491.407	1.00027	99.9268
59.4889	373.722	1844.81	4.08688	250.264	516.416	73.1746	17.277	76.982	491.409	1.00027	99.9374
59.5814	373.681	1844.78	4.07973	250.227	516.262	73.1258	17.1913	77.2	491.41	1.00027	99.948
59.6739	373.641	1844.75	4.07253	250.188	516.107	73.0765	17.1053	77.419	491.411	1.00027	99.9585
59.7664	373.6	1844.72	4.06529	250.149	515.951	73.0265	17.0189	77.6391	491.413	1.00027	99.969
59.859	373.559	1844.69	4.05801	250.109	515.792	72.9758	16.9321	77.8604	491.415	1.00027	99.9794
59.9515	373.517	1844.66	4.05067	250.069	515.631	72.9245	16.8449	78.0828	491.416	1.00027	99.9897
60.044	373.475	1844.64	4.04328	250.027	515.468	72.8725	16.7574	78.3066	491.418	1.00027	100
60.1365	373.433	1844.61	4.03584	249.984	515.303	72.8198	16.6693	78.5317	491.42	1.00027	100.01
60.229	373.39	1844.58	4.02833	249.941	515.135	72.7663	16.5808	78.7582	491.422	1.00027	100.02
60.3215	373.347	1844.55	4.02077	249.896	514.965	72.7119	16.4917	78.9862	491.424	1.00027	100.03
60.4141	373.303	1844.51	4.01314	249.851	514.792	72.6567	16.4022	79.2158	491.426	1.00027	100.04
60.5066	373.259	1844.48	4.00543	249.804	514.617	72.6006	16.312	79.4471	491.429	1.00027	100.05
60.5991	373.215	1844.45	3.99765	249.756	514.438	72.5436	16.2211	79.6802	491.432	1.00027	100.06
60.6916	373.169	1844.42	3.98979	249.707	514.256	72.4855	16.1296	79.9153	491.434	1.00027	100.069
60.7841	373.124	1844.39	3.98184	249.656	514.071	72.4263	16.0373	80.1525	491.437	1.00027	100.079
60.8766	373.077	1844.35	3.97379	249.604	513.883	72.366	15.9442	80.3919	491.44	1.00027	100.089
60.9692	373.03	1844.32	3.96564	249.551	513.69	72.3044	15.8502	80.6338	491.444	1.00027	100.098
61.0617	372.982	1844.28	3.95738	249.496	513.493	72.2414	15.7552	80.8783	491.447	1.00027	100.107
61.1542	372.934	1844.24	3.949	249.439	513.291	72.177	15.6591	81.1258	491.451	1.00027	100.116
61.2467	372.884	1844.21	3.94047	249.38	513.085	72.1109	15.5617	81.3765	491.455	1.00027	100.125
61.3392	372.833	1844.17	3.9318	249.319	512.873	72.0432	15.4631	81.6307	491.459	1.00028	100.134
61.4318	372.782	1844.13	3.92297	249.256	512.655	71.9734	15.3629	81.8889	491.464	1.00028	100.143
61.5243	372.729	1844.09	3.91394	249.19	512.43	71.9016	15.2611	82.1515	491.469	1.00028	100.152
61.6168	372.674	1844.04	3.90471	249.121	512.197	71.8273	15.1573	82.4191	491.474	1.00028	100.16
61.7093	372.618	1844	3.89524	249.049	511.956	71.7504	15.0513	82.6923	491.48	1.00028	100.169
61.8018	372.56	1843.95	3.88549	248.973	511.705	71.6704	14.9428	82.9721	491.486	1.00028	100.177
61.8943	372.501	1843.9	3.87543	248.893	511.443	71.5869	14.8314	83.2593	491.493	1.00028	100.185
61.9869	372.438	1843.85	3.865	248.808	511.168	71.4993	14.7164	83.5555	491.501	1.00028	100.193
62.0794	372.371	1843.8	3.85382	248.715	510.869	71.4045	14.594	83.8704	491.509	1.00028	100.2
62.1719	372.295	1843.73	3.84135	248.608	510.531	71.2975	14.458	84.2191	491.519	1.00028	100.208
62.2644	372.21	1843.65	3.82735	248.485	510.146	71.1758	14.3064	84.6072	491.531	1.00028	100.216
62.3569	372.113	1843.57	3.81167	248.343	509.707	71.0376	14.1379	85.038	491.546	1.00028	100.224
62.4494	372.005	1843.47	3.79416	248.181	509.209	70.881	13.9511	85.5143	491.563	1.00028	100.232
62.542	371.883	1843.35	3.77466	247.993	508.644	70.7039	13.7448	86.0391	491.583	1.00028	100.239
62.6345	371.747	1843.22	3.753	247.779	508.005	70.5039	13.5178	86.615	491.607	1.00028	100.245
62.727	371.595	1843.07	3.72902	247.533	507.283	70.2787	13.2689	87.2441	491.636	1.00028	100.25
62.8195	371.426	1842.89	3.70256	247.252	506.469	70.0256	12.9972	87.9282	491.67	1.00028	100.253
62.912	371.238	1842.69	3.67345	246.932	505.553	69.7419	12.7019	88.6683	491.709	1.00028	100.253
63.0046	371.029	1842.47	3.64154	246.567	504.525	69.4248	12.3824	89.4644	491.756	1.00028	100.25
63.0971	370.8	1842.2	3.60672	246.152	503.374	69.0712	12.0385	90.3157	491.811	1.00028	100.242
63.1896	370.547	1841.91	3.56885	245.682	502.089	68.6782	11.6704	91.2199	491.875	1.00028	100.228
63.2821	370.27	1841.56	3.52785	245.151	500.658	68.2429	11.2784	92.1735	491.95	1.00028	100.208
63.3746	369.967	1841.17	3.48366	244.553	499.069	67.7623	10.8637	93.1713	492.037	1.00028	100.18
63.4671	369.638	1840.73	3.43625	243.88	497.312	67.2336	10.4277	94.2066	492.137	1.00028	100.141
63.5597	369.281	1840.23	3.38562	243.127	495.373	66.6544	9.97227	95.2709	492.253	1.00028	100.092
63.6522	368.896	1839.66	3.33182	242.287	493.242	66.0222	9.49989	96.3537	492.386	1.00028	100.029
63.7447	368.483	1839.01	3.27495	241.353	490.908	65.3353	9.01349	97.4433	492.539	1.00028	99.9513
63.8372	368.041	1838.28	3.21513	240.318	488.362	64.5921	8.51637	98.5262	492.712	1.00029	99.8565
63.9297	367.571	1837.46	3.15254	239.177	485.595	63.7916	8.01223	99.5877	492.909	1.00029	99.7428
64.0222	367.073	1836.54	3.0874	237.924	482.599	62.9335	7.50497	100.612	493.131	1.00029	99.6081
64.1148	366.547	1835.52	3.01993	236.554	479.37	62.018	6.99864	101.583	493.381	1.00029	99.4506
64.2073	365.997	1834.37	2.95043	235.063	475.903	61.0459	6.49729	102.485	493.661	1.00029	99.2686
64.2998	365.422	1833.1	2.87917	233.447	472.196	60.0187	6.00485	103.301	493.973	1.00029	99.0605
64.3923	364.825	1831.71	2.80648	231.704	468.249	58.9385	5.525	104.018	494.319	1.00029	98.8247
64.4848	364.207	1830.17	2.73266	229.832	464.063	57.8079	5.06107	104.619	494.702	1.00029	98.5602
64.5774	363.571	1828.49	2.65802	227.831	459.643	56.6301	4.61595	105.095	495.122	1.00029	98.2657
64.6699	362.92	1826.66	2.58287	225.701	454.991	55.4089	4.19206	105.434	495.583	1.00029	97.9406
64.7624	362.254	1824.68	2.50749	223.445	450.117	54.1482	3.79125	105.628	496.086	1.00029	97.5844
64.8549	361.578	1822.54	2.43215	221.063	445.026	52.8524	3.41487	105.671	496.632	1.00029	97.1967
64.9474	360.892	1820.24	2.35712	218.56	439.729	51.5261	3.06375	105.559	497.223	1.00029	96.7774
65.0399	360.198	1817.79	2.2826	215.939	434.234	50.174	2.73825	105.291	497.861	1.00029	96.3266
65.1325	359.499	1815.17	2.20882	213.205	428.554	48.8008	2.43827	104.866	498.545	1.00029	95.8447
65.225	358.797	1812.38	2.13593	210.363	422.699	47.4114	2.16338	104.287	499.276	1.00029	95.3321
65.3175	358.091	1809.43	2.06411	207.419	416.681	46.0106	1.91283	103.557	500.055	1.00029	94.7894
65.41	357.384	1806.31	1.99348	204.378	410.512	44.603	1.68561	102.681	500.882	1.00029	94.2173
65.5025	356.677	1803.03	1.92415	201.248	404.206	43.193	1.48054	101.666	501.757	1.00029	93.6168
65.595	355.971	1799.58	1.85622	198.035	397.773	41.785	1.29631	100.519	502.678	1.00029	92.9886
65.6876	355.266	1795.96	1.78976	194.745	391.227	40.383	1.13152	99.2482	503.646	1.00029	92.334
65.7801	354.562	1792.17	1.72483	191.386	384.58	38.9909	0.984727	97.8616	504.658	1.00029	91.6538
65.8726	353.861	1788.21	1.66148	187.965	377.843	37.6122	0.854486	96.3683	505.713	1.00029	90.9492
65.9651	353.162	1784.08	1.59974	184.487	371.03	36.2503	0.739368	94.7776	506.81	1.00029	90.2214
66.0576	352.466	1779.78	1.53963	180.962	364.152	34.9081	0.637988	93.0986	507.945	1.00029	89.4715
66.1502	351.774	1775.32	1.48117	177.394	357.219	33.5883	0.54902	91.3405	509.118	1.00029	88.7008
66.2427	351.084	1770.69	1.42436	173.791	350.244	32.2933	0.471209	89.5124	510.325	1.00029	87.9104
66.3352	350.398	1765.91	1.3692	170.16	343.237	31.0254	0.403378	87.6232	511.564	1.00029	87.1015
66.4277	349.716	1760.96	1.31568	166.506	336.207	29.7863	0.344436	85.6814	512.831	1.00029	86.2753
66.5202	349.038	1755.86	1.2638	162.837	329.166	28.5776	0.293374	83.6952	514.124	1.00029	85.4331
66.6127	348.363	1750.6	1.21353	159.157	322.122	27.4007	0.249271	81.6724	515.438	1.00029	84.576
66.7053	347.692	1745.2	1.16486	155.472	315.085	26.2566	0.211291	79.6207	516.771	1.00029	83.7052
66.7978	347.025	1739.66	1.11776	151.789	308.063	25.1461	0.178676	77.5468	518.118	1.00029	82.8218
66.8903	346.363	1733.98	1.07221	148.112	301.064	24.0699	0.150746	75.4576	519.475	1.00029	81.9271
66.9828	345.705	1728.17	1.02818	144.446	294.096	23.0285	0.126892	73.3592	520.839	1.00029	81.022
67.0753	345.051	1722.24	0.985639	140.795	287.167	22.0219	0.106575	71.2573	522.206	1.00029	80.1078
67.1678	344.402	1716.18	0.944563	137.165	280.283	21.0503	0.0893137	69.1572	523.57	1.00029	79.1854
67.2604	343.758	1710.02	0.904919	133.56	273.451	20.1135	0.0746866	67.064	524.928	1.00029	78.256
67.3529	343.119	1703.75	0.866675	129.982	266.676	19.2114	0.0623225	64.9822	526.275	1.00029	77.3206
67.4454	342.485	1697.38	0.829798	126.437	259.965	18.3435	0.0518967	62.9159	527.607	1.00029	76.3801
67.5379	341.857	1690.91	0.794255	122.927	253.323	17.5093	0.0431263	60.8689	528.919	1.00029	75.4356
67.6304	341.235	1684.37	0.760014	119.456	246.754	16.7083	0.0357659	58.8448	530.206	1.00029	74.488
67.723	340.618	1677.75	0.72704	116.027	240.264	15.9398	0.029603	56.8465	531.464	1.00029	73.5382
67.8155	340.007	1671.06	0.695301	112.641	233.855	15.2031	0.0244544	54.8771	532.688	1.00029	72.587
67.908	339.402	1664.31	0.664762	109.303	227.533	14.4973	0.0201626	52.9389	533.873	1.00029	71.6355
68.0005	338.804	1657.5	0.635391	106.014	221.301	13.8217	0.0165929	51.0343	535.014	1.00029	70.6843
68.093	338.213	1650.65	0.607154	102.776	215.161	13.1753	0.0136301	49.1653	536.108	1.00029	69.7343
68.1855	337.628	1643.76	0.580018	99.5911	209.117	12.5572	0.0111762	47.3336	537.15	1.00029	68.7863
68.2781	337.05	1636.84	0.553951	96.4612	203.171	11.9666	0.00914779	45.5407	538.134	1.00029	67.8408
68.3706	336.48	1629.89	0.52892	93.3877	197.325	11.4025	0.00747458	43.788	539.058	1.00029	66.8988
68.4631	335.916	1622.92	0.504893	90.372	191.582	10.8638	0.00609705	42.0766	539.915	1.00029	65.9608
68.5556	335.36	1615.93	0.481838	87.4154	185.944	10.3498	0.00496512	40.4074	540.703	1.00029	65.0274
68.6481	334.812	1608.94	0.459725	84.5187	180.411	9.85938	0.00403676	38.7812	541.418	1.00029	64.0992
68.7406	334.27	1601.95	0.438522	81.683	174.985	9.39169	0.00327676	37.1985	542.055	1.00029	63.1768
68.8332	333.737	1594.96	0.4182	78.9091	169.668	8.94579	0.00265571	35.6598	542.612	1.00029	62.2607
68.9257	333.211	1587.98	0.398728	76.1974	164.461	8.52079	0.00214909	34.1653	543.085	1.00029	61.3514
69.0182	332.693	1581.01	0.380077	73.5485	159.363	8.1158	0.00173654	32.7152	543.47	1.00029	60.4493
69.1107	332.183	1574.06	0.362219	70.9627	154.375	7.72996	0.00140115	31.3096	543.766	1.00029	59.5549
69.2032	331.68	1567.13	0.345126	68.4403	149.499	7.36244	0.00112894	29.9483	543.969	1.00029	58.6684
69.2958	331.186	1560.23	0.32877	65.9813	144.733	7.01243	0.00090836	28.6311	544.077	1.00029	57.7904
69.3883	330.699	1553.36	0.313124	63.5859	140.078	6.67914	0.0007299	27.3578	544.088	1.00029	56.9211
69.4808	330.22	1546.53	0.298163	61.2537	135.534	6.36181	0.00058573	26.128	544.001	1.00029	56.0607
69.5733	329.749	1539.73	0.28386	58.9848	131.101	6.05971	0.00046944	24.9411	543.814	1.00029	55.2096
69.6658	329.285	1532.97	0.270191	56.7786	126.777	5.77214	0.00037577	23.7967	543.526	1.00029	54.3679
69.7583	328.83	1526.26	0.257132	54.635	122.563	5.49842	0.00030043	22.694	543.137	1.00029	53.5358
69.8509	328.382	1519.58	0.244659	52.5533	118.457	5.23789	0.00023991	21.6325	542.645	1.00029	52.7136
69.9434	327.941	1512.96	0.232748	50.533	114.46	4.98994	0.00019137	20.6113	542.051	1.00029	51.9012
70.0359	327.509	1506.39	0.221378	48.5735	110.569	4.75396	0.00015248	19.6298	541.355	1.00029	51.0989
70.1284	327.084	1499.87	0.210526	46.6741	106.784	4.52939	0.00012136	18.6869	540.557	1.00029	50.3067
70.2209	326.666	1493.4	0.200173	44.834	103.104	4.31566	9.65e-05	17.782	539.659	1.00029	49.5247
70.3135	326.256	1486.99	0.190297	43.0524	99.5267	4.11227	7.665e-05	16.9139	538.661	1.00029	48.7529
70.406	325.854	1480.63	0.180879	41.3284	96.052	3.91871	6.082e-05	16.082	537.565	1.00029	47.9914
70.4985	325.458	1474.34	0.1719	39.661	92.6781	3.73451	4.822e-05	15.285	536.372	1.00029	47.24
70.591	325.07	1468.1	0.163341	38.0493	89.4033	3.5592	3.819e-05	14.5222	535.085	1.00029	46.4989
70.6835	324.689	1461.92	0.155185	36.4923	86.2262	3.39237	3.022e-05	13.7924	533.706	1.00029	45.7679
70.776	324.315	1455.8	0.147414	34.9888	83.1451	3.23358	2.39e-05	13.0947	532.236	1.00029	45.0471
70.8686	323.948	1449.75	0.140011	33.5378	80.1585	3.08245	1.888e-05	12.4281	530.68	1.00029	44.3363
70.9611	323.588	1443.76	0.132962	32.1382	77.2644	2.93861	1.49e-05	11.7916	529.039	1.00029	43.6354
71.0536	323.235	1437.83	0.126249	30.7888	74.4613	2.8017	1.176e-05	11.1841	527.317	1.00029	42.9445
71.1461	322.889	1431.96	0.11986	29.4885	71.7473	2.67138	9.27e-06	10.6047	525.517	1.00029	42.2633
71.2386	322.549	1426.17	0.113778	28.236	69.1205	2.54732	7.3e-06	10.0524	523.643	1.00029	41.5918
71.3311	322.215	1420.43	0.107991	27.0301	66.5792	2.42922	5.75e-06	9.52607	521.698	1.00029	40.9299
71.4237	321.889	1414.76	0.102486	25.8697	64.1213	2.31678	4.52e-06	9.02487	519.686	1.00029	40.2774
71.5162	321.568	1409.16	0.0972486	24.7535	61.745	2.20974	3.55e-06	8.54781	517.612	1.00029	39.6343
71.6087	321.254	1403.63	0.092268	23.6804	59.4485	2.10782	2.79e-06	8.09393	515.478	1.00029	39.0003
71.7012	320.946	1398.16	0.0875322	22.649	57.2296	2.01077	2.19e-06	7.66231	513.289	1.00029	38.3754
71.7937	320.644	1392.76	0.08303	21.6581	55.0867	1.91836	1.72e-06	7.25204	511.049	1.00029	37.7595
71.8863	320.348	1387.42	0.0787505	20.7067	53.0176	1.83036	1.35e-06	6.86224	508.762	1.00029	37.1523
71.9788	320.058	1382.16	0.0746835	19.7933	51.0205	1.74655	1.06e-06	6.49204	506.432	1.00029	36.5538
72.0713	319.774	1376.96	0.0708191	18.917	49.0934	1.66672	8.3e-07	6.1406	504.065	1.00029	35.9639
72.1638	319.495	1371.83	0.0671478	18.0764	47.2345	1.5907	6.5e-07	5.80709	501.663	1.00029	35.3824
72.2563	319.222	1366.76	0.0636605	17.2704	45.4418	1.51828	5.1e-07	5.49073	499.23	1.00029	34.8092
72.3488	318.954	1361.77	0.0603487	16.4979	43.7135	1.44929	4e-07	5.19074	496.772	1.00029	34.2442
72.4414	318.692	1356.84	0.0572039	15.7576	42.0477	1.38357	3.1e-07	4.90637	494.293	1.00029	33.6872
72.5339	318.435	1351.98	0.0542183	15.0486	40.4425	1.32096	2.4e-07	4.6369	491.795	1.00029	33.1382
72.6264	318.184	1347.18	0.0513842	14.3697	38.8962	1.26131	1.9e-07	4.38164	489.284	1.00029	32.597
72.7189	317.937	1342.46	0.0486944	13.7198	37.407	1.20447	1.5e-07	4.13991	486.762	1.00029	32.0636
72.8114	317.696	1337.8	0.046142	13.0979	35.973	1.15031	1.2e-07	3.91107	484.235	1.00029	31.5377
72.9039	317.459	1333.21	0.0437202	12.5029	34.5926	1.0987	9e-08	3.69449	481.705	1.00029	31.0194
72.9965	317.227	1328.68	0.0414229	11.9339	33.264	1.04952	7e-08	3.48957	479.176	1.00029	30.5086
73.089	317	1324.22	0.0392438	11.3899	31.9856	1.00264	6e-08	3.29573	476.652	1.00029	30.0051
73.1815	316.778	1319.83	0.0371773	10.8698	30.7558	0.957966	4e-08	3.11244	474.136	1.00029	29.5089
73.274	316.56	1315.51	0.0352179	10.3729	29.5729	0.915384	3e-08	2.93914	471.631	1.00029	29.0199
73.3665	316.346	1311.25	0.0333602	9.89811	28.4354	0.874796	3e-08	2.77535	469.14	1.00029	28.5381
73.4591	316.137	1307.05	0.0315993	9.44464	27.3417	0.836106	2e-08	2.62057	466.666	1.00029	28.0633
73.5516	315.933	1302.93	0.0299304	9.01162	26.2905	0.799224	2e-08	2.47434	464.212	1.00029	27.5955
73.6441	315.732	1298.86	0.0283489	8.59823	25.2801	0.764064	1e-08	2.33622	461.78	1.00029	27.1348
73.7366	315.536	1294.87	0.0268505	8.20366	24.3092	0.730545	1e-08	2.20578	459.373	1.00029	26.6809
73.8291	315.343	1290.93	0.0254309	7.82715	23.3764	0.698588	1e-08	2.08262	456.994	1.00029	26.2339
73.9216	315.155	1287.07	0.0240863	7.46793	22.4805	0.66812	1e-08	1.96636	454.644	1.00029	25.7938
74.0142	314.971	1283.26	0.0228129	7.1253	21.6199	0.639072	0	1.85663	452.326	1.00029	25.3605
74.1067	314.79	1279.52	0.0216071	6.79854	20.7936	0.611375	0	1.75309	450.041	1.00029	24.9339
74.1992	314.613	1275.85	0.0204655	6.487	20.0003	0.584967	0	1.65539	447.792	1.00029	24.5142
74.2917	314.44	1272.23	0.0193848	6.19001	19.2387	0.559788	0	1.56323	445.579	1.00029	24.1012
74.3842	314.27	1268.69	0.0183619	5.90696	18.5078	0.53578	0	1.4763	443.405	1.00029	23.6949
74.4767	314.104	1265.2	0.0173939	5.63724	17.8064	0.512888	0	1.39432	441.27	1.00029	23.2954
74.5693	313.942	1261.77	0.016478	5.38027	17.1334	0.491062	0	1.31702	439.176	1.00029	22.9025
74.6618	313.782	1258.41	0.0156115	5.1355	16.4878	0.470251	0	1.24415	437.124	1.00029	22.5164
74.7543	313.627	1255.11	0.0147919	4.90239	15.8686	0.450409	0	1.17545	435.115	1.00029	22.1371
74.8468	313.474	1251.88	0.0140167	4.68043	15.2749	0.431491	0	1.11071	433.149	1.00029	21.7644
74.9393	313.325	1248.7	0.0132837	4.46912	14.7056	0.413455	0	1.04969	431.228	1.00029	21.3985
75.0319	313.179	1245.59	0.0125906	4.26799	14.1598	0.396261	0	0.992195	429.352	1.00029	21.0394
75.1244	313.037	1242.53	0.0119355	4.07659	13.6368	0.379871	0	0.938029	427.522	1.00029	20.687
75.2169	312.897	1239.54	0.0113164	3.89449	13.1356	0.364248	0	0.887006	425.737	1.00029	20.3414
75.3094	312.761	1236.61	0.0107313	3.72127	12.6554	0.349357	0	0.838948	423.999	1.00029	20.0027
75.4019	312.628	1233.74	0.0101785	3.55653	12.1955	0.335167	0	0.793692	422.307	1.00029	19.6708
75.4944	312.497	1230.93	0.0096564	3.39989	11.7552	0.321645	0	0.75108	420.662	1.00029	19.3457
75.587	312.37	1228.19	0.00916332	3.251	11.3336	0.308763	0	0.710964	419.063	1.00029	19.0276
75.6795	312.246	1225.5	0.00869777	3.1095	10.9302	0.296492	0	0.673205	417.512	1.00029	18.7165
75.772	312.125	1222.88	0.00825831	2.97507	10.5442	0.284805	0	0.637671	416.006	1.00029	18.4123
75.8645	312.007	1220.32	0.00784361	2.84739	10.1751	0.273677	0	0.604238	414.548	1.00029	18.1152
75.957	311.891	1217.82	0.00745236	2.72616	9.82218	0.263086	0	0.572788	413.136	1.00029	17.8252
76.0495	311.779	1215.38	0.00708337	2.6111	9.48494	0.253006	0	0.543212	411.77	1.00029	17.5424
76.1421	311.67	1213.01	0.00673549	2.50193	9.16282	0.243419	0	0.515406	410.451	1.00029	17.2667
76.2346	311.564	1210.7	0.00640763	2.39841	8.8553	0.234302	0	0.489271	409.177	1.00029	16.9984
76.3271	311.46	1208.45	0.00609877	2.30029	8.56188	0.225637	0	0.464717	407.948	1.00029	16.7374
76.4196	311.36	1206.26	0.00580795	2.20733	8.2821	0.217407	0	0.441657	406.765	1.00029	16.4838
76.5121	311.263	1204.14	0.00553427	2.11932	8.01551	0.209593	0	0.42001	405.627	1.00029	16.2378
76.6047	311.168	1202.09	0.00527687	2.03606	7.76171	0.202181	0	0.399701	404.533	1.00029	15.9994
76.6972	311.077	1200.1	0.00503496	1.95735	7.52029	0.195155	0	0.38066	403.484	1.00029	15.7686
76.7897	310.989	1198.18	0.00480778	1.88301	7.2909	0.188501	0	0.362819	402.478	1.00029	15.5457
76.8822	310.904	1196.32	0.00459464	1.81287	7.0732	0.182206	0	0.346117	401.516	1.00029	15.3306
76.9747	310.822	1194.54	0.00439488	1.74678	6.86686	0.176259	0	0.330497	400.598	1.00029	15.1236
77.0672	310.743	1192.82	0.00420789	1.68458	6.6716	0.170648	0	0.315906	399.723	1.00029	14.9248
77.1598	310.668	1191.18	0.00403312	1.62614	6.48715	0.165363	0	0.302295	398.89	1.00029	14.7342
77.2523	310.596	1189.61	0.00387004	1.57134	6.31328	0.160394	0	0.289619	398.101	1.00029	14.5521
77.3448	310.527	1188.11	0.00371818	1.52006	6.14977	0.155734	0	0.277835	397.354	1.00029	14.3786
77.4373	310.462	1186.68	0.00357709	1.4722	5.99642	0.151374	0	0.266907	396.65	1.00029	14.2138
77.5298	310.4	1185.34	0.0034464	1.42766	5.85309	0.147309	0	0.256799	395.989	1.00029	14.058
77.6223	310.342	1184.07	0.00332575	1.38638	5.71963	0.143532	0	0.247482	395.37	1.00029	13.9113
77.7149	310.287	1182.88	0.00321482	1.34827	5.59594	0.140039	0	0.238928	394.794	1.00029	13.7739
77.8074	310.237	1181.77	0.00311335	1.31328	5.48193	0.136826	0	0.231114	394.261	1.00029	13.6461
77.8999	310.19	1180.75	0.0030211	1.28136	5.37757	0.133889	0	0.224018	393.771	1.00029	13.528
77.9924	310.147	1179.81	0.00293789	1.25247	5.28283	0.131228	0	0.217625	393.325	1.00029	13.4199
78.0849	310.108	1178.97	0.00286358	1.2266	5.19772	0.12884	0	0.211921	392.923	1.00029	13.3221
78.1775	310.073	1178.21	0.00279807	1.20374	5.12229	0.126727	0	0.206897	392.566	1.00029	13.2349
78.27	310.043	1177.55	0.00274129	1.18387	5.05661	0.12489	0	0.202546	392.255	1.00029	13.1586
78.3625	310.017	1176.99	0.00269323	1.16703	5.00081	0.12333	0	0.198866	391.989	1.00029	13.0934
78.455	309.995	1176.52	0.00265394	1.15323	4.95504	0.122051	0	0.195859	391.771	1.00029	13.0397
78.5475	309.979	1176.16	0.00262349	1.14252	4.91947	0.121058	0	0.193529	391.602	1.00029	12.9978
78.64	309.967	1175.9	0.00260195	1.13495	4.89427	0.120355	0	0.191882	391.482	1.00029	12.9681
78.7326	309.96	1175.75	0.00258919	1.13045	4.87931	0.119938	0	0.190906	391.41	1.00029	12.9504

## Sheet: scenarios
depth	nr1	nr2	nr3	nr4
0	0	1	1	0
0.0925177	-8.04668e-06	0.999788	1	2.34348
0.185035	-1.641e-05	0.99957	1	4.68189
0.277553	-2.49845e-05	0.999349	1	7.01515
0.370071	-3.37702e-05	0.999125	1	9.34324
0.462588	-4.28461e-05	0.998898	1	11.6662
0.555106	-5.21596e-05	0.998667	1	13.9839
0.647624	-6.16843e-05	0.998433	1	16.2965
0.740142	-7.14729e-05	0.998196	1	18.604
0.832659	-8.15254e-05	0.997956	1	20.9063
0.925177	-9.18419e-05	0.997712	1	23.2034
1.01769	-0.000102422	0.997465	1	25.4954
1.11021	-0.00011324	0.997215	1	27.7822
1.20273	-0.000124349	0.996961	1	30.0638
1.29525	-0.000135748	0.996704	1	32.3403
1.38777	-0.00014741	0.996444	1	34.6116
1.48028	-0.000159337	0.99618	1	36.8777
1.5728	-0.00017158	0.995913	1	39.1387
1.66532	-0.000184088	0.995643	1	41.3946
1.75784	-0.000196886	0.995369	1	43.6452
1.85035	-0.000210001	0.995091	1	45.8908
1.94287	-0.000223379	0.99481	1	48.1311
2.03539	-0.000237075	0.994524	1	50.3663
2.12791	-0.000251087	0.994235	1	52.5964
2.22042	-0.000265363	0.993942	1	54.8212
2.31294	-0.000280009	0.993645	1	57.041
2.40546	-0.000294972	0.993344	1	59.2555
2.49798	-0.000310226	0.993039	1	61.4649
2.5905	-0.000325822	0.99273	1	63.6692
2.68301	-0.000341736	0.992416	1	65.8683
2.77553	-0.000357992	0.992099	1	68.0622
2.86805	-0.000374592	0.991778	1	70.251
2.96057	-0.000391536	0.991453	1	72.4346
3.05308	-0.000408796	0.991124	1	74.613
3.1456	-0.000426452	0.99079	1	76.7864
3.23812	-0.000444399	0.990453	1	78.9545
3.33064	-0.000462742	0.990111	1	81.1175
3.42315	-0.000481455	0.989765	1	83.2754
3.51567	-0.000500511	0.989415	1	85.428
3.60819	-0.000519937	0.989061	1	87.5756
3.70071	-0.000539759	0.988703	1	89.718
3.79323	-0.000559898	0.98834	1	91.8552
3.88574	-0.00058046	0.987974	1	93.9873
3.97826	-0.000601391	0.987602	1	96.1142
4.07078	-0.000622719	0.987227	1	98.236
4.1633	-0.000644416	0.986848	1	100.353
4.25581	-0.000666484	0.986464	1	102.464
4.34833	-0.000688974	0.986076	1	104.57
4.44085	-0.000711834	0.985683	1	106.672
4.53337	-0.000735143	0.985286	1	108.768
4.62588	-0.000758795	0.984885	1	110.859
4.7184	-0.000782897	0.98448	1	112.944
4.81092	-0.000807369	0.98407	1	115.025
4.90344	-0.000832263	0.983656	1	117.1
4.99596	-0.00085758	0.983237	1	119.171
5.08847	-0.000883294	0.982814	1	121.236
5.18099	-0.000909457	0.982387	1	123.296
5.27351	-0.000936016	0.981955	1	125.351
5.36603	-0.000962998	0.981519	1	127.4
5.45854	-0.000990403	0.981078	1	129.445
5.55106	-0.00101826	0.980633	1	131.484
5.64358	-0.00104653	0.980183	1	133.519
5.7361	-0.00107523	0.979729	1	135.548
5.82861	-0.00110436	0.979271	1	137.572
5.92113	-0.00113393	0.978808	1	139.591
6.01365	-0.00116395	0.978341	1	141.605
6.10617	-0.0011944	0.977869	1	143.613
6.19869	-0.00122529	0.977392	1	145.617
6.2912	-0.00125663	0.976911	1	147.615
6.38372	-0.0012884	0.976426	1	149.609
6.47624	-0.00132064	0.975936	1	151.597
6.56876	-0.00135334	0.975442	1	153.58
6.66127	-0.00138645	0.974943	1	155.558
6.75379	-0.00142004	0.974439	1	157.53
6.84631	-0.00145408	0.973931	1	159.498
6.93883	-0.0014886	0.973419	1	161.461
7.03135	-0.00152354	0.972902	1	163.418
7.12386	-0.00155896	0.97238	1	165.37
7.21638	-0.00159485	0.971854	1	167.318
7.3089	-0.00163116	0.971323	1	169.26
7.40142	-0.00166798	0.970788	1	171.197
7.49393	-0.00170525	0.970248	1	173.129
7.58645	-0.00174297	0.969703	1	175.055
7.67897	-0.00178116	0.969154	1	176.977
7.77149	-0.00181986	0.968601	1	178.894
7.864	-0.001859	0.968042	1	180.805
7.95652	-0.0018986	0.96748	1	182.712
8.04904	-0.0019387	0.966912	1	184.613
8.14156	-0.00197922	0.96634	1	186.509
8.23408	-0.00202027	0.965764	1	188.4
8.32659	-0.00206177	0.965182	1	190.287
8.41911	-0.00210375	0.964596	1	192.168
8.51163	-0.00214623	0.964006	1	194.044
8.60415	-0.00218916	0.963411	1	195.914
8.69666	-0.00223257	0.962811	1	197.78
8.78918	-0.00227645	0.962207	1	199.641
8.8817	-0.00232084	0.961598	1	201.497
8.97422	-0.00236571	0.960984	1	203.347
9.06673	-0.00241105	0.960366	1	205.193
9.15925	-0.00245684	0.959743	1	207.034
9.25177	-0.00250316	0.959116	1	208.869
9.34429	-0.00254995	0.958484	1	210.7
9.43681	-0.00259723	0.957847	1	212.525
9.52932	-0.002645	0.957206	1	214.346
9.62184	-0.00269323	0.95656	1	216.161
9.71436	-0.00274199	0.955909	1	217.972
9.80688	-0.00279119	0.955254	1	219.777
9.89939	-0.00284093	0.954594	1	221.578
9.99191	-0.00289109	0.953929	1	223.373
10.0844	-0.00294181	0.95326	1	225.164
10.1769	-0.002993	0.952586	1	226.949
10.2695	-0.00304465	0.951908	1	228.73
10.362	-0.00309682	0.951225	1	230.506
10.4545	-0.00314947	0.950537	1	232.276
10.547	-0.00320263	0.949844	1	234.042
10.6395	-0.00325626	0.949147	1	235.803
10.7321	-0.00331037	0.948446	1	237.559
10.8246	-0.00336501	0.947739	1	239.31
10.9171	-0.00342013	0.947028	1	241.056
11.0096	-0.00347572	0.946313	1	242.798
11.1021	-0.00353185	0.945593	1	244.534
11.1946	-0.00358845	0.944868	1	246.266
11.2872	-0.00364553	0.944139	1	247.992
11.3797	-0.00370312	0.943405	1	249.714
11.4722	-0.00376118	0.942666	1	251.431
11.5647	-0.00381977	0.941923	1	253.143
11.6572	-0.00387884	0.941175	1	254.851
11.7497	-0.00393841	0.940423	1	256.553
11.8423	-0.00399846	0.939666	1	258.251
11.9348	-0.00405902	0.938905	1	259.945
12.0273	-0.00412005	0.938139	1	261.633
12.1198	-0.00418159	0.937369	1	263.317
12.2123	-0.0042436	0.936594	1	264.996
12.3049	-0.00430612	0.935814	1	266.67
12.3974	-0.00436912	0.93503	1	268.34
12.4899	-0.00443262	0.934242	1	270.005
12.5824	-0.00449663	0.933449	1	271.665
12.6749	-0.00456111	0.932652	1	273.321
12.7674	-0.00462605	0.931851	1	274.973
12.86	-0.00469152	0.931045	1	276.619
12.9525	-0.00475743	0.930234	1	278.262
13.045	-0.00482386	0.92942	1	279.899
13.1375	-0.00489079	0.928601	1	281.533
13.23	-0.00495817	0.927778	1	283.162
13.3225	-0.005026	0.92695	1	284.786
13.4151	-0.00509436	0.926119	1	286.406
13.5076	-0.00516315	0.925283	1	288.022
13.6001	-0.00523242	0.924444	1	289.633
13.6926	-0.00530219	0.9236	1	291.241
13.7851	-0.00537239	0.922752	1	292.844
13.8777	-0.00544309	0.9219	1	294.442
13.9702	-0.00551422	0.921044	1	296.037
14.0627	-0.0055858	0.920185	1	297.628
14.1552	-0.00565786	0.919322	1	299.214
14.2477	-0.00573034	0.918454	1	300.796
14.3402	-0.00580326	0.917584	1	302.375
14.4328	-0.00587662	0.916709	1	303.949
14.5253	-0.00595044	0.915831	1	305.52
14.6178	-0.00602463	0.91495	1	307.087
14.7103	-0.00609927	0.914065	1	308.65
14.8028	-0.00617434	0.913177	1	310.209
14.8953	-0.00624978	0.912286	1	311.765
14.9879	-0.00632567	0.911392	1	313.317
15.0804	-0.00640191	0.910495	1	314.865
15.1729	-0.00647855	0.909594	1	316.41
15.2654	-0.00655557	0.908691	1	317.952
15.3579	-0.00663293	0.907786	1	319.49
15.4505	-0.00671066	0.906878	1	321.025
15.543	-0.00678872	0.905967	1.00001	322.557
15.6355	-0.00686715	0.905054	1.00001	324.085
15.728	-0.00694587	0.904139	1.00001	325.611
15.8205	-0.00702489	0.903222	1.00001	327.134
15.913	-0.00710422	0.902303	1.00001	328.654
16.0056	-0.00718383	0.901382	1.00001	330.171
16.0981	-0.0072637	0.90046	1.00001	331.685
16.1906	-0.00734387	0.899537	1.00001	333.197
16.2831	-0.00742428	0.898611	1.00001	334.707
16.3756	-0.00750495	0.897685	1.00001	336.213
16.4682	-0.00758587	0.896757	1.00001	337.717
16.5607	-0.00766706	0.895827	1.00001	339.219
16.6532	-0.00774851	0.894896	1.00001	340.718
16.7457	-0.00783021	0.893964	1.00001	342.214
16.8382	-0.00791214	0.89303	1.00001	343.708
16.9307	-0.00799435	0.892095	1.00001	345.199
17.0233	-0.00807677	0.891159	1.00001	346.688
17.1158	-0.00815946	0.890221	1.00001	348.174
17.2083	-0.00824239	0.889282	1.00001	349.658
17.3008	-0.00832556	0.888341	1.00001	351.138
17.3933	-0.00840897	0.8874	1.00001	352.617
17.4858	-0.00849263	0.886457	1.00001	354.093
17.5784	-0.00857652	0.885512	1.00001	355.566
17.6709	-0.00866063	0.884567	1.00001	357.036
17.7634	-0.00874499	0.88362	1.00001	358.505
17.8559	-0.00882958	0.882672	1.00001	359.97
17.9484	-0.00891439	0.881723	1.00001	361.433
18.041	-0.00899944	0.880772	1.00001	362.894
18.1335	-0.00908471	0.879821	1.00001	364.352
18.226	-0.00917022	0.878868	1.00001	365.807
18.3185	-0.00925595	0.877914	1.00001	367.26
18.411	-0.00934189	0.876959	1.00001	368.71
18.5035	-0.00942804	0.876002	1.00001	370.158
18.5961	-0.00951444	0.875045	1.00001	371.603
18.6886	-0.00960105	0.874086	1.00001	373.046
18.7811	-0.00968786	0.873127	1.00001	374.486
18.8736	-0.0097749	0.872166	1.00001	375.923
18.9661	-0.00986216	0.871204	1.00001	377.359
19.0586	-0.00994961	0.870241	1.00001	378.791
19.1512	-0.0100373	0.869277	1.00001	380.221
19.2437	-0.0101252	0.868312	1.00001	381.649
19.3362	-0.0102133	0.867346	1.00001	383.074
19.4287	-0.0103016	0.866379	1.00001	384.496
19.5212	-0.0103901	0.865411	1.00001	385.916
19.6138	-0.0104788	0.864442	1.00001	387.334
19.7063	-0.0105678	0.863472	1.00001	388.749
19.7988	-0.0106569	0.862501	1.00001	390.161
19.8913	-0.0107462	0.861529	1.00001	391.571
19.9838	-0.0108358	0.860556	1.00001	392.979
20.0763	-0.0109255	0.859582	1.00001	394.384
20.1689	-0.0110155	0.858607	1.00001	395.786
20.2614	-0.0111056	0.857631	1.00001	397.186
20.3539	-0.0111959	0.856654	1.00001	398.584
20.4464	-0.0112865	0.855676	1.00001	399.979
20.5389	-0.0113772	0.854697	1.00001	401.372
20.6314	-0.0114681	0.853718	1.00001	402.762
20.724	-0.0115592	0.852737	1.00001	404.149
20.8165	-0.0116506	0.851756	1.00001	405.534
20.909	-0.0117421	0.850773	1.00001	406.917
21.0015	-0.0118338	0.84979	1.00001	408.297
21.094	-0.0119257	0.848806	1.00001	409.675
21.1866	-0.0120177	0.847821	1.00001	411.05
21.2791	-0.01211	0.846835	1.00001	412.423
21.3716	-0.0122025	0.845848	1.00002	413.793
21.4641	-0.0122951	0.844861	1.00002	415.161
21.5566	-0.012388	0.843872	1.00002	416.527
21.6491	-0.012481	0.842883	1.00002	417.89
21.7417	-0.0125742	0.841893	1.00002	419.25
21.8342	-0.0126676	0.840902	1.00002	420.608
21.9267	-0.0127612	0.839911	1.00002	421.964
22.0192	-0.012855	0.838918	1.00002	423.317
22.1117	-0.0129489	0.837925	1.00002	424.668
22.2042	-0.013043	0.836931	1.00002	426.016
22.2968	-0.0131374	0.835936	1.00002	427.362
22.3893	-0.0132319	0.83494	1.00002	428.706
22.4818	-0.0133266	0.833944	1.00002	430.047
22.5743	-0.0134214	0.832946	1.00002	431.385
22.6668	-0.0135165	0.831948	1.00002	432.721
22.7594	-0.0136117	0.83095	1.00002	434.055
22.8519	-0.0137071	0.82995	1.00002	435.386
22.9444	-0.0138027	0.82895	1.00002	436.715
23.0369	-0.0138984	0.827949	1.00002	438.042
23.1294	-0.0139944	0.826947	1.00002	439.366
23.2219	-0.0140905	0.825945	1.00002	440.688
23.3145	-0.0141868	0.824941	1.00002	442.007
23.407	-0.0142833	0.823937	1.00002	443.324
23.4995	-0.01438	0.822933	1.00002	444.638
23.592	-0.0144768	0.821927	1.00002	445.95
23.6845	-0.0145738	0.820921	1.00002	447.26
23.777	-0.014671	0.819914	1.00002	448.567
23.8696	-0.0147683	0.818907	1.00002	449.872
23.9621	-0.0148659	0.817899	1.00002	451.175
24.0546	-0.0149636	0.81689	1.00002	452.475
24.1471	-0.0150615	0.81588	1.00002	453.772
24.2396	-0.0151595	0.81487	1.00002	455.068
24.3322	-0.0152578	0.813859	1.00002	456.361
24.4247	-0.0153562	0.812848	1.00002	457.651
24.5172	-0.0154548	0.811835	1.00002	458.939
24.6097	-0.0155535	0.810822	1.00002	460.225
24.7022	-0.0156524	0.809809	1.00002	461.509
24.7947	-0.0157515	0.808794	1.00002	462.79
24.8873	-0.0158508	0.80778	1.00002	464.069
24.9798	-0.0159503	0.806764	1.00002	465.345
25.0723	-0.0160499	0.805748	1.00002	466.619
25.1648	-0.0161497	0.804731	1.00002	467.891
25.2573	-0.0162496	0.803713	1.00003	469.16
25.3498	-0.0163498	0.802695	1.00003	470.427
25.4424	-0.0164501	0.801677	1.00003	471.691
25.5349	-0.0165506	0.800657	1.00003	472.954
25.6274	-0.0166512	0.799637	1.00003	474.214
25.7199	-0.0167521	0.798617	1.00003	475.471
25.8124	-0.016853	0.797595	1.00003	476.726
25.905	-0.0169542	0.796574	1.00003	477.979
25.9975	-0.0170556	0.795551	1.00003	479.23
26.09	-0.0171571	0.794528	1.00003	480.478
26.1825	-0.0172588	0.793504	1.00003	481.724
26.275	-0.0173606	0.79248	1.00003	482.967
26.3675	-0.0174626	0.791455	1.00003	484.209
26.4601	-0.0175648	0.79043	1.00003	485.448
26.5526	-0.0176672	0.789404	1.00003	486.684
26.6451	-0.0177697	0.788377	1.00003	487.919
26.7376	-0.0178724	0.78735	1.00003	489.15
26.8301	-0.0179753	0.786322	1.00003	490.38
26.9227	-0.0180784	0.785294	1.00003	491.607
27.0152	-0.0181816	0.784265	1.00003	492.832
27.1077	-0.018285	0.783236	1.00003	494.055
27.2002	-0.0183886	0.782206	1.00003	495.276
27.2927	-0.0184923	0.781175	1.00003	496.494
27.3852	-0.0185962	0.780144	1.00003	497.71
27.4778	-0.0187003	0.779112	1.00003	498.923
27.5703	-0.0188045	0.77808	1.00003	500.134
27.6628	-0.018909	0.777047	1.00003	501.343
27.7553	-0.0190135	0.776014	1.00003	502.55
27.8478	-0.0191183	0.77498	1.00003	503.754
27.9403	-0.0192232	0.773946	1.00003	504.956
28.0329	-0.0193283	0.772911	1.00003	506.156
28.1254	-0.0194336	0.771875	1.00003	507.354
28.2179	-0.019539	0.770839	1.00003	508.549
28.3104	-0.0196447	0.769803	1.00003	509.742
28.4029	-0.0197505	0.768766	1.00003	510.933
28.4955	-0.0198564	0.767728	1.00003	512.121
28.588	-0.0199626	0.76669	1.00003	513.307
28.6805	-0.0200688	0.765652	1.00004	514.491
28.773	-0.0201754	0.764613	1.00004	515.673
28.8655	-0.020282	0.763573	1.00004	516.852
28.958	-0.0203888	0.762533	1.00004	518.03
29.0506	-0.0204958	0.761492	1.00004	519.205
29.1431	-0.020603	0.760451	1.00004	520.377
29.2356	-0.0207103	0.75941	1.00004	521.548
29.3281	-0.0208178	0.758367	1.00004	522.716
29.4206	-0.0209255	0.757325	1.00004	523.882
29.5131	-0.0210334	0.756282	1.00004	525.045
29.6057	-0.0211415	0.755238	1.00004	526.207
29.6982	-0.0212496	0.754194	1.00004	527.366
29.7907	-0.021358	0.75315	1.00004	528.523
29.8832	-0.0214666	0.752105	1.00004	529.678
29.9757	-0.0215753	0.751059	1.00004	530.83
30.0683	-0.0216842	0.750013	1.00004	531.981
30.1608	-0.0217933	0.748967	1.00004	533.129
30.2533	-0.0219026	0.74792	1.00004	534.274
30.3458	-0.022012	0.746873	1.00004	535.418
30.4383	-0.0221216	0.745825	1.00004	536.56
30.5308	-0.0222314	0.744777	1.00004	537.699
30.6234	-0.0223413	0.743728	1.00004	538.836
30.7159	-0.0224515	0.742679	1.00004	539.971
30.8084	-0.0225618	0.74163	1.00004	541.103
30.9009	-0.0226723	0.74058	1.00004	542.234
30.9934	-0.0227829	0.739529	1.00004	543.362
31.0859	-0.0228938	0.738478	1.00004	544.488
31.1785	-0.0230048	0.737427	1.00004	545.612
31.271	-0.023116	0.736375	1.00004	546.733
31.3635	-0.0232273	0.735323	1.00004	547.853
31.456	-0.0233389	0.734271	1.00004	548.97
31.5485	-0.0234506	0.733218	1.00004	550.085
31.6411	-0.0235625	0.732164	1.00004	551.198
31.7336	-0.0236746	0.73111	1.00004	552.308
31.8261	-0.0237869	0.730056	1.00005	553.417
31.9186	-0.0238993	0.729002	1.00005	554.523
32.0111	-0.0240119	0.727947	1.00005	555.627
32.1036	-0.0241247	0.726891	1.00005	556.729
32.1962	-0.0242377	0.725835	1.00005	557.829
32.2887	-0.0243509	0.724779	1.00005	558.927
32.3812	-0.0244642	0.723723	1.00005	560.022
32.4737	-0.0245777	0.722666	1.00005	561.116
32.5662	-0.0246914	0.721608	1.00005	562.207
32.6587	-0.0248053	0.72055	1.00005	563.296
32.7513	-0.0249194	0.719492	1.00005	564.383
32.8438	-0.0250336	0.718434	1.00005	565.467
32.9363	-0.025148	0.717375	1.00005	566.55
33.0288	-0.0252626	0.716316	1.00005	567.63
33.1213	-0.0253775	0.715256	1.00005	568.709
33.2139	-0.0254924	0.714196	1.00005	569.785
33.3064	-0.0256076	0.713136	1.00005	570.859
33.3989	-0.0257229	0.712076	1.00005	571.931
33.4914	-0.0258385	0.711015	1.00005	573.001
33.5839	-0.0259542	0.709953	1.00005	574.068
33.6764	-0.0260701	0.708892	1.00005	575.134
33.769	-0.0261862	0.70783	1.00005	576.197
33.8615	-0.0263024	0.706767	1.00005	577.258
33.954	-0.0264189	0.705705	1.00005	578.317
34.0465	-0.0265355	0.704642	1.00005	579.374
34.139	-0.0266523	0.703579	1.00005	580.429
34.2315	-0.0267694	0.702515	1.00005	581.482
34.3241	-0.0268865	0.701451	1.00005	582.533
34.4166	-0.0270039	0.700387	1.00005	583.581
34.5091	-0.0271215	0.699322	1.00005	584.628
34.6016	-0.0272393	0.698258	1.00005	585.672
34.6941	-0.0273572	0.697193	1.00005	586.714
34.7867	-0.0274754	0.696127	1.00005	587.755
34.8792	-0.0275937	0.695062	1.00005	588.793
34.9717	-0.0277122	0.693996	1.00006	589.829
35.0642	-0.0278309	0.692929	1.00006	590.863
35.1567	-0.0279498	0.691863	1.00006	591.894
35.2492	-0.0280689	0.690796	1.00006	592.924
35.3418	-0.0281882	0.689729	1.00006	593.952
35.4343	-0.0283076	0.688662	1.00006	594.977
35.5268	-0.0284273	0.687594	1.00006	596.001
35.6193	-0.0285472	0.686527	1.00006	597.022
35.7118	-0.0286672	0.685459	1.00006	598.042
35.8043	-0.0287875	0.68439	1.00006	599.059
35.8969	-0.0289079	0.683322	1.00006	600.074
35.9894	-0.0290286	0.682253	1.00006	601.087
36.0819	-0.0291494	0.681184	1.00006	602.098
36.1744	-0.0292704	0.680115	1.00006	603.107
36.2669	-0.0293916	0.679046	1.00006	604.114
36.3595	-0.029513	0.677976	1.00006	605.119
36.452	-0.0296346	0.676906	1.00006	606.122
36.5445	-0.0297564	0.675836	1.00006	607.123
36.637	-0.0298784	0.674766	1.00006	608.122
36.7295	-0.0300006	0.673696	1.00006	609.118
36.822	-0.030123	0.672625	1.00006	610.113
36.9146	-0.0302456	0.671554	1.00006	611.106
37.0071	-0.0303684	0.670484	1.00006	612.096
37.0996	-0.0304914	0.669413	1.00006	613.085
37.1921	-0.0306145	0.668341	1.00006	614.071
37.2846	-0.0307379	0.66727	1.00006	615.056
37.3772	-0.0308615	0.666198	1.00006	616.038
37.4697	-0.0309853	0.665127	1.00006	617.019
37.5622	-0.0311093	0.664055	1.00006	617.997
37.6547	-0.0312334	0.662983	1.00006	618.974
37.7472	-0.0313578	0.661911	1.00006	619.948
37.8397	-0.0314824	0.660839	1.00006	620.921
37.9323	-0.0316072	0.659766	1.00006	621.891
38.0248	-0.0317322	0.658694	1.00006	622.859
38.1173	-0.0318574	0.657621	1.00006	623.826
38.2098	-0.0319828	0.656549	1.00007	624.79
38.3023	-0.0321084	0.655476	1.00007	625.753
38.3948	-0.0322342	0.654403	1.00007	626.713
38.4874	-0.0323602	0.65333	1.00007	627.671
38.5799	-0.0324864	0.652257	1.00007	628.628
38.6724	-0.0326128	0.651184	1.00007	629.582
38.7649	-0.0327395	0.650111	1.00007	630.535
38.8574	-0.0328663	0.649038	1.00007	631.485
38.95	-0.0329934	0.647965	1.00007	632.433
39.0425	-0.0331206	0.646892	1.00007	633.38
39.135	-0.0332481	0.645818	1.00007	634.324
39.2275	-0.0333758	0.644745	1.00007	635.267
39.32	-0.0335036	0.643672	1.00007	636.207
39.4125	-0.0336317	0.642598	1.00007	637.146
39.5051	-0.03376	0.641525	1.00007	638.083
39.5976	-0.0338885	0.640452	1.00007	639.017
39.6901	-0.0340172	0.639378	1.00007	639.95
39.7826	-0.0341462	0.638305	1.00007	640.881
39.8751	-0.0342753	0.637232	1.00007	641.809
39.9676	-0.0344047	0.636159	1.00007	642.736
40.0602	-0.0345342	0.635086	1.00007	643.661
40.1527	-0.034664	0.634012	1.00007	644.584
40.2452	-0.034794	0.632939	1.00007	645.505
40.3377	-0.0349242	0.631866	1.00007	646.424
40.4302	-0.0350546	0.630793	1.00007	647.341
40.5228	-0.0351853	0.629721	1.00007	648.256
40.6153	-0.0353161	0.628648	1.00007	649.169
40.7078	-0.0354472	0.627575	1.00007	650.08
40.8003	-0.0355785	0.626503	1.00007	650.99
40.8928	-0.03571	0.62543	1.00007	651.897
40.9853	-0.0358417	0.624358	1.00007	652.803
41.0779	-0.0359737	0.623286	1.00007	653.706
41.1704	-0.0361058	0.622214	1.00007	654.608
41.2629	-0.0362382	0.621142	1.00007	655.508
41.3554	-0.0363708	0.62007	1.00007	656.405
41.4479	-0.0365036	0.618999	1.00008	657.301
41.5404	-0.0366367	0.617927	1.00008	658.195
41.633	-0.0367699	0.616856	1.00008	659.087
41.7255	-0.0369034	0.615785	1.00008	659.977
41.818	-0.0370371	0.614714	1.00008	660.866
41.9105	-0.0371711	0.613644	1.00008	661.752
42.003	-0.0373052	0.612573	1.00008	662.636
42.0956	-0.0374396	0.611503	1.00008	663.519
42.1881	-0.0375742	0.610433	1.00008	664.4
42.2806	-0.037709	0.609364	1.00008	665.278
42.3731	-0.037844	0.608294	1.00008	666.155
42.4656	-0.0379793	0.607225	1.00008	667.03
42.5581	-0.0381149	0.606156	1.00008	667.903
42.6507	-0.0382506	0.605088	1.00008	668.775
42.7432	-0.0383865	0.60402	1.00008	669.644
42.8357	-0.0385227	0.602952	1.00008	670.511
42.9282	-0.0386591	0.601884	1.00008	671.377
43.0207	-0.0387958	0.600817	1.00008	672.241
43.1132	-0.0389326	0.59975	1.00008	673.103
43.2058	-0.0390698	0.598684	1.00008	673.963
43.2983	-0.0392071	0.597617	1.00008	674.821
43.3908	-0.0393447	0.596552	1.00008	675.677
43.4833	-0.0394825	0.595486	1.00008	676.531
43.5758	-0.0396205	0.594421	1.00008	677.384
43.6684	-0.0397588	0.593357	1.00008	678.235
43.7609	-0.0398972	0.592293	1.00008	679.084
43.8534	-0.040036	0.591229	1.00008	679.931
43.9459	-0.040175	0.590166	1.00008	680.776
44.0384	-0.0403142	0.589103	1.00008	681.619
44.1309	-0.0404536	0.588041	1.00008	682.461
44.2235	-0.0405933	0.586979	1.00008	683.3
44.316	-0.0407332	0.585918	1.00008	684.138
44.4085	-0.0408734	0.584857	1.00008	684.974
44.501	-0.0410138	0.583797	1.00008	685.808
44.5935	-0.0411544	0.582737	1.00008	686.641
44.686	-0.0412953	0.581678	1.00008	687.471
44.7786	-0.0414364	0.580619	1.00008	688.3
44.8711	-0.0415777	0.579561	1.00009	689.127
44.9636	-0.0417193	0.578504	1.00009	689.952
45.0561	-0.0418611	0.577447	1.00009	690.775
45.1486	-0.0420032	0.576391	1.00009	691.596
45.2412	-0.0421456	0.575335	1.00009	692.416
45.3337	-0.0422881	0.57428	1.00009	693.234
45.4262	-0.0424309	0.573226	1.00009	694.05
45.5187	-0.042574	0.572172	1.00009	694.864
45.6112	-0.0427173	0.571119	1.00009	695.676
45.7037	-0.0428608	0.570067	1.00009	696.487
45.7963	-0.0430046	0.569016	1.00009	697.296
45.8888	-0.0431486	0.567965	1.00009	698.103
45.9813	-0.0432929	0.566915	1.00009	698.908
46.0738	-0.0434375	0.565866	1.00009	699.712
46.1663	-0.0435823	0.564817	1.00009	700.513
46.2588	-0.0437273	0.563769	1.00009	701.313
46.3514	-0.0438726	0.562723	1.00009	702.111
46.4439	-0.0440181	0.561676	1.00009	702.908
46.5364	-0.0441639	0.560631	1.00009	703.702
46.6289	-0.04431	0.559587	1.00009	704.495
46.7214	-0.0444563	0.558543	1.00009	705.286
46.814	-0.0446028	0.557501	1.00009	706.075
46.9065	-0.0447496	0.556459	1.00009	706.863
46.999	-0.0448967	0.555418	1.00009	707.649
47.0915	-0.045044	0.554378	1.00009	708.433
47.184	-0.0451916	0.553339	1.00009	709.215
47.2765	-0.0453394	0.552301	1.00009	709.995
47.3691	-0.0454875	0.551264	1.00009	710.774
47.4616	-0.0456359	0.550228	1.00009	711.551
47.5541	-0.0457845	0.549193	1.00009	712.326
47.6466	-0.0459334	0.548159	1.00009	713.1
47.7391	-0.0460825	0.547127	1.00009	713.872
47.8316	-0.0462319	0.546095	1.00009	714.642
47.9242	-0.0463816	0.545064	1.00009	715.41
48.0167	-0.0465315	0.544034	1.00009	716.177
48.1092	-0.0466817	0.543006	1.00009	716.942
48.2017	-0.0468321	0.541978	1.00009	717.705
48.2942	-0.0469829	0.540952	1.00009	718.466
48.3868	-0.0471338	0.539927	1.00009	719.226
48.4793	-0.0472851	0.538903	1.0001	719.984
48.5718	-0.0474366	0.53788	1.0001	720.74
48.6643	-0.0475884	0.536859	1.0001	721.495
48.7568	-0.0477405	0.535839	1.0001	722.248
48.8493	-0.0478928	0.53482	1.0001	722.999
48.9419	-0.0480454	0.533802	1.0001	723.748
49.0344	-0.0481983	0.532786	1.0001	724.496
49.1269	-0.0483514	0.531771	1.0001	725.242
49.2194	-0.0485049	0.530757	1.0001	725.986
49.3119	-0.0486586	0.529745	1.0001	726.729
49.4045	-0.0488125	0.528734	1.0001	727.47
49.497	-0.0489668	0.527724	1.0001	728.209
49.5895	-0.0491213	0.526716	1.0001	728.947
49.682	-0.0492761	0.525709	1.0001	729.683
49.7745	-0.0494312	0.524704	1.0001	730.417
49.867	-0.0495866	0.5237	1.0001	731.149
49.9596	-0.0497423	0.522698	1.0001	731.88
50.0521	-0.0498982	0.521697	1.0001	732.609
50.1446	-0.0500544	0.520698	1.0001	733.337
50.2371	-0.0502109	0.5197	1.0001	734.063
50.3296	-0.0503677	0.518704	1.0001	734.787
50.4221	-0.0505248	0.517709	1.0001	735.51
50.5147	-0.0506821	0.516716	1.0001	736.231
50.6072	-0.0508398	0.515725	1.0001	736.95
50.6997	-0.0509977	0.514735	1.0001	737.667
50.7922	-0.051156	0.513747	1.0001	738.383
50.8847	-0.0513145	0.512761	1.0001	739.098
50.9773	-0.0514733	0.511776	1.0001	739.81
51.0698	-0.0516324	0.510793	1.0001	740.521
51.1623	-0.0517918	0.509812	1.0001	741.231
51.2548	-0.0519515	0.508833	1.0001	741.938
51.3473	-0.0521115	0.507855	1.0001	742.644
51.4398	-0.0522718	0.506879	1.0001	743.349
51.5324	-0.0524324	0.505905	1.0001	744.052
51.6249	-0.0525933	0.504933	1.0001	744.753
51.7174	-0.0527545	0.503963	1.0001	745.452
51.8099	-0.052916	0.502995	1.0001	746.15
51.9024	-0.0530778	0.502028	1.0001	746.847
51.9949	-0.0532399	0.501064	1.0001	747.542
52.0875	-0.0534023	0.500101	1.0001	748.235
52.18	-0.0535651	0.499141	1.00011	748.926
52.2725	-0.0537281	0.498182	1.00011	749.616
52.365	-0.0538915	0.497225	1.00011	750.304
52.4575	-0.0540551	0.496271	1.00011	750.991
52.5501	-0.0542191	0.495318	1.00011	751.676
52.6426	-0.0543834	0.494368	1.00011	752.36
52.7351	-0.054548	0.493419	1.00011	753.042
52.8276	-0.054713	0.492473	1.00011	753.722
52.9201	-0.0548782	0.491529	1.00011	754.401
53.0126	-0.0550438	0.490587	1.00011	755.078
53.1052	-0.0552098	0.489647	1.00011	755.753
53.1977	-0.055376	0.488709	1.00011	756.427
53.2902	-0.0555426	0.487773	1.00011	757.1
53.3827	-0.0557095	0.48684	1.00011	757.771
53.4752	-0.0558767	0.485909	1.00011	758.44
53.5677	-0.0560443	0.48498	1.00011	759.107
53.6603	-0.0562121	0.484053	1.00011	759.774
53.7528	-0.0563804	0.483129	1.00011	760.438
53.8453	-0.056549	0.482206	1.00011	761.101
53.9378	-0.0567179	0.481287	1.00011	761.763
54.0303	-0.0568872	0.480369	1.00011	762.423
54.1229	-0.0570568	0.479454	1.00011	763.081
54.2154	-0.0572268	0.478541	1.00011	763.738
54.3079	-0.0573971	0.47763	1.00011	764.393
54.4004	-0.0575677	0.476722	1.00011	765.047
54.4929	-0.0577388	0.475816	1.00011	765.699
54.5854	-0.0579102	0.474912	1.00011	766.349
54.678	-0.0580819	0.474011	1.00011	766.998
54.7705	-0.058254	0.473112	1.00011	767.646
54.863	-0.0584266	0.472216	1.00011	768.292
54.9555	-0.0585994	0.471322	1.00011	768.937
55.048	-0.0587727	0.47043	1.00011	769.58
55.1405	-0.0589463	0.469541	1.00011	770.221
55.2331	-0.0591203	0.468654	1.00011	770.861
55.3256	-0.0592947	0.467769	1.00011	771.499
55.4181	-0.0594695	0.466887	1.00011	772.136
55.5106	-0.0596447	0.466007	1.00011	772.772
55.6031	-0.0598202	0.46513	1.00011	773.406
55.6957	-0.0599962	0.464255	1.00011	774.038
55.7882	-0.0601726	0.463383	1.00011	774.669
55.8807	-0.0603494	0.462512	1.00011	775.298
55.9732	-0.0605266	0.461645	1.00011	775.926
56.0657	-0.0607043	0.460779	1.00011	776.552
56.1582	-0.0608823	0.459916	1.00011	777.177
56.2508	-0.0610608	0.459055	1.00012	777.801
56.3433	-0.0612397	0.458197	1.00012	778.423
56.4358	-0.0614191	0.45734	1.00012	779.043
56.5283	-0.0615989	0.456486	1.00012	779.662
56.6208	-0.0617792	0.455634	1.00012	780.28
56.7133	-0.0619599	0.454785	1.00012	780.896
56.8059	-0.0621411	0.453937	1.00012	781.51
56.8984	-0.0623228	0.453092	1.00012	782.123
56.9909	-0.062505	0.452248	1.00012	782.735
57.0834	-0.0626876	0.451407	1.00012	783.345
57.1759	-0.0628708	0.450568	1.00012	783.954
57.2685	-0.0630545	0.44973	1.00012	784.561
57.361	-0.0632386	0.448895	1.00012	785.167
57.4535	-0.0634234	0.448061	1.00012	785.771
57.546	-0.0636086	0.447229	1.00012	786.374
57.6385	-0.0637944	0.446399	1.00012	786.975
57.731	-0.0639808	0.44557	1.00012	787.575
57.8236	-0.0641677	0.444743	1.00012	788.174
57.9161	-0.0643552	0.443917	1.00012	788.771
58.0086	-0.0645433	0.443092	1.00012	789.367
58.1011	-0.064732	0.442269	1.00012	789.961
58.1936	-0.0649214	0.441447	1.00012	790.554
58.2861	-0.0651114	0.440625	1.00012	791.145
58.3787	-0.065302	0.439805	1.00012	791.735
58.4712	-0.0654933	0.438985	1.00012	792.323
58.5637	-0.0656854	0.438165	1.00012	792.911
58.6562	-0.0658781	0.437346	1.00012	793.496
58.7487	-0.0660716	0.436527	1.00012	794.081
58.8413	-0.0662658	0.435708	1.00012	794.664
58.9338	-0.0664609	0.434889	1.00012	795.245
59.0263	-0.0666567	0.434069	1.00012	795.825
59.1188	-0.0668534	0.433248	1.00012	796.404
59.2113	-0.067051	0.432426	1.00012	796.981
59.3038	-0.0672494	0.431603	1.00012	797.557
59.3964	-0.0674489	0.430778	1.00012	798.131
59.4889	-0.0676493	0.429951	1.00012	798.705
59.5814	-0.0678507	0.429122	1.00012	799.276
59.6739	-0.0680532	0.42829	1.00012	799.847
59.7664	-0.0682568	0.427454	1.00012	800.416
59.859	-0.0684616	0.426615	1.00012	800.983
59.9515	-0.0686676	0.425771	1.00012	801.549
60.044	-0.0688749	0.424922	1.00012	802.114
60.1365	-0.0690836	0.424068	1.00012	802.678
60.229	-0.0692937	0.423207	1.00012	803.24
60.3215	-0.0695053	0.422339	1.00012	803.8
60.4141	-0.0697186	0.421462	1.00012	804.36
60.5066	-0.0699337	0.420577	1.00012	804.918
60.5991	-0.0701506	0.419681	1.00012	805.474
60.6916	-0.0703694	0.418774	1.00013	806.03
60.7841	-0.0705904	0.417855	1.00013	806.584
60.8766	-0.0708137	0.41692	1.00013	807.136
60.9692	-0.0710395	0.41597	1.00013	807.688
61.0617	-0.0712681	0.415001	1.00013	808.237
61.1542	-0.0714996	0.414012	1.00013	808.786
61.2467	-0.0717344	0.412999	1.00013	809.333
61.3392	-0.0719728	0.41196	1.00013	809.879
61.4318	-0.0722151	0.410891	1.00013	810.424
61.5243	-0.072462	0.409788	1.00013	810.967
61.6168	-0.0727139	0.408646	1.00013	811.509
61.7093	-0.0729715	0.407459	1.00013	812.05
61.8018	-0.0732358	0.40622	1.00013	812.589
61.8943	-0.0735076	0.404919	1.00013	813.127
61.9869	-0.0737884	0.403545	1.00013	813.664
62.0794	-0.0740874	0.402043	1.00013	814.199
62.1719	-0.0744188	0.400326	1.00013	814.733
62.2644	-0.0747885	0.39836	1.00013	815.266
62.3569	-0.0751998	0.396116	1.00013	815.797
62.4494	-0.0756559	0.393563	1.00013	816.327
62.542	-0.0761599	0.39067	1.00013	816.856
62.6345	-0.0767148	0.387404	1.00013	817.384
62.727	-0.0773235	0.383734	1.00013	817.91
62.8195	-0.0779882	0.379628	1.00013	818.435
62.912	-0.0787108	0.375057	1.00013	818.959
63.0046	-0.0794924	0.369993	1.00013	819.481
63.0971	-0.0803335	0.364414	1.00013	820.002
63.1896	-0.0812334	0.358301	1.00013	820.522
63.2821	-0.0821902	0.351645	1.00013	821.04
63.3746	-0.083201	0.344441	1.00013	821.558
63.4671	-0.0842612	0.336696	1.00013	822.074
63.5597	-0.0853651	0.328423	1.00013	822.589
63.6522	-0.0865051	0.31965	1.00013	823.102
63.7447	-0.0876726	0.310411	1.00013	823.614
63.8372	-0.0888577	0.300752	1.00013	824.125
63.9297	-0.0900492	0.290728	1.00013	824.635
64.0222	-0.0912357	0.280403	1.00013	825.143
64.1148	-0.0924052	0.269844	1.00013	825.651
64.2073	-0.0935461	0.259126	1.00013	826.157
64.2998	-0.0946473	0.248321	1.00013	826.661
64.3923	-0.095699	0.237503	1.00013	827.165
64.4848	-0.0966927	0.226744	1.00013	827.667
64.5774	-0.0976219	0.216108	1.00013	828.168
64.6699	-0.098482	0.205654	1.00013	828.668
64.7624	-0.0992702	0.195435	1.00013	829.166
64.8549	-0.0999858	0.185493	1.00013	829.664
64.9474	-0.10063	0.175863	1.00013	830.16
65.0399	-0.101205	0.166573	1.00013	830.655
65.1325	-0.101714	0.157642	1.00013	831.148
65.225	-0.102162	0.149083	1.00013	831.641
65.3175	-0.102554	0.140903	1.00013	832.132
65.41	-0.102895	0.133103	1.00013	832.622
65.5025	-0.103189	0.125682	1.00013	833.11
65.595	-0.103443	0.118633	1.00013	833.598
65.6876	-0.103661	0.111948	1.00013	834.084
65.7801	-0.103848	0.105616	1.00013	834.569
65.8726	-0.104007	0.0996244	1.00013	835.053
65.9651	-0.104142	0.0939609	1.00013	835.536
66.0576	-0.104257	0.0886114	1.00013	836.018
66.1502	-0.104354	0.0835615	1.00013	836.498
66.2427	-0.104437	0.078797	1.00013	836.977
66.3352	-0.104506	0.0743037	1.00013	837.455
66.4277	-0.104565	0.0700676	1.00013	837.932
66.5202	-0.104615	0.066075	1.00013	838.407
66.6127	-0.104657	0.0623128	1.00013	838.882
66.7053	-0.104692	0.0587683	1.00013	839.355
66.7978	-0.104721	0.0554293	1.00013	839.827
66.8903	-0.104746	0.0522841	1.00013	840.297
66.9828	-0.104767	0.0493217	1.00013	840.767
67.0753	-0.104785	0.0465315	1.00013	841.235
67.1678	-0.1048	0.0439034	1.00013	841.703
67.2604	-0.104812	0.0414281	1.00013	842.169
67.3529	-0.104822	0.0390967	1.00013	842.634
67.4454	-0.104831	0.0369005	1.00013	843.097
67.5379	-0.104839	0.0348318	1.00013	843.56
67.6304	-0.104845	0.0328829	1.00013	844.021
67.723	-0.10485	0.0310468	1.00013	844.482
67.8155	-0.104854	0.0293168	1.00013	844.941
67.908	-0.104858	0.0276867	1.00013	845.399
68.0005	-0.104861	0.0261505	1.00013	845.855
68.093	-0.104864	0.0247027	1.00013	846.311
68.1855	-0.104866	0.0233381	1.00013	846.765
68.2781	-0.104868	0.0220518	1.00013	847.218
68.3706	-0.104869	0.0208391	1.00013	847.671
68.4631	-0.10487	0.0196957	1.00013	848.121
68.5556	-0.104871	0.0186176	1.00013	848.571
68.6481	-0.104872	0.0176009	1.00013	849.02
68.7406	-0.104873	0.016642	1.00013	849.467
68.8332	-0.104874	0.0157375	1.00013	849.914
68.9257	-0.104874	0.0148842	1.00013	850.359
69.0182	-0.104875	0.0140791	1.00013	850.803
69.1107	-0.104875	0.0133195	1.00013	851.245
69.2032	-0.104875	0.0126026	1.00013	851.687
69.2958	-0.104876	0.0119261	1.00013	852.128
69.3883	-0.104876	0.0112875	1.00013	852.567
69.4808	-0.104876	0.0106846	1.00013	853.005
69.5733	-0.104876	0.0101154	1.00013	853.442
69.6658	-0.104876	0.00957794	1.00013	853.878
69.7583	-0.104876	0.0090704	1.00013	854.313
69.8509	-0.104876	0.00859104	1.00013	854.746
69.9434	-0.104876	0.00813824	1.00013	855.179
70.0359	-0.104877	0.00771049	1.00013	855.61
70.1284	-0.104877	0.00730635	1.00013	856.04
70.2209	-0.104877	0.00692448	1.00013	856.469
70.3135	-0.104877	0.00656358	1.00013	856.897
70.406	-0.104877	0.00622249	1.00013	857.323
70.4985	-0.104877	0.00590007	1.00013	857.749
70.591	-0.104877	0.00559525	1.00013	858.173
70.6835	-0.104877	0.00530706	1.00013	858.596
70.776	-0.104877	0.00503454	1.00013	859.018
70.8686	-0.104877	0.00477681	1.00013	859.439
70.9611	-0.104877	0.00453304	1.00013	859.858
71.0536	-0.104877	0.00430244	1.00013	860.277
71.1461	-0.104877	0.00408429	1.00013	860.694
71.2386	-0.104877	0.00387787	1.00013	861.11
71.3311	-0.104877	0.00368254	1.00013	861.525
71.4237	-0.104877	0.00349768	1.00013	861.938
71.5162	-0.104877	0.00332269	1.00013	862.351
71.6087	-0.104877	0.00315704	1.00013	862.762
71.7012	-0.104877	0.00300022	1.00013	863.172
71.7937	-0.104877	0.00285171	1.00013	863.58
71.8863	-0.104877	0.00271108	1.00013	863.988
71.9788	-0.104877	0.0025779	1.00013	864.394
72.0713	-0.104877	0.00245173	1.00013	864.799
72.1638	-0.104877	0.00233221	1.00013	865.203
72.2563	-0.104877	0.00221897	1.00013	865.606
72.3488	-0.104877	0.00211167	1.00013	866.007
72.4414	-0.104877	0.00200998	1.00013	866.407
72.5339	-0.104877	0.0019136	1.00013	866.806
72.6264	-0.104877	0.00182223	1.00013	867.203
72.7189	-0.104877	0.00173562	1.00013	867.599
72.8114	-0.104877	0.0016535	1.00013	867.994
72.9039	-0.104877	0.00157563	1.00013	868.388
72.9965	-0.104877	0.00150178	1.00013	868.78
73.089	-0.104877	0.00143174	1.00013	869.171
73.1815	-0.104877	0.0013653	1.00013	869.561
73.274	-0.104877	0.00130227	1.00013	869.949
73.3665	-0.104877	0.00124248	1.00013	870.335
73.4591	-0.104877	0.00118573	1.00013	870.721
73.5516	-0.104877	0.00113189	1.00013	871.105
73.6441	-0.104877	0.00108079	1.00013	871.487
73.7366	-0.104877	0.0010323	1.00013	871.868
73.8291	-0.104877	0.000986264	1.00013	872.248
73.9216	-0.104877	0.000942567	1.00013	872.626
74.0142	-0.104877	0.000901075	1.00013	873.003
74.1067	-0.104877	0.000861701	1.00013	873.378
74.1992	-0.104877	0.000824303	1.00013	873.751
74.2917	-0.104877	0.000788787	1.00013	874.123
74.3842	-0.104877	0.000755077	1.00013	874.493
74.4767	-0.104877	0.000723063	1.00013	874.862
74.5693	-0.104877	0.000692659	1.00013	875.229
74.6618	-0.104877	0.00066379	1.00013	875.594
74.7543	-0.104877	0.000636369	1.00013	875.957
74.8468	-0.104877	0.000610343	1.00013	876.319
74.9393	-0.104877	0.000585619	1.00013	876.679
75.0319	-0.104877	0.000562158	1.00013	877.037
75.1244	-0.104877	0.000539873	1.00013	877.393
75.2169	-0.104877	0.000518731	1.00013	877.747
75.3094	-0.104877	0.000498666	1.00013	878.099
75.4019	-0.104877	0.000479627	1.00013	878.448
75.4944	-0.104877	0.000461574	1.00013	878.796
75.587	-0.104877	0.000444459	1.00013	879.142
75.6795	-0.104877	0.000428249	1.00013	879.485
75.772	-0.104877	0.000412898	1.00013	879.826
75.8645	-0.104877	0.000398377	1.00013	880.164
75.957	-0.104877	0.000384651	1.00013	880.5
76.0495	-0.104877	0.000371699	1.00013	880.833
76.1421	-0.104877	0.000359485	1.00013	881.163
76.2346	-0.104877	0.000347996	1.00013	881.491
76.3271	-0.104877	0.000337218	1.00013	881.816
76.4196	-0.104877	0.000327113	1.00013	882.137
76.5121	-0.104877	0.000317678	1.00013	882.455
76.6047	-0.104877	0.000308901	1.00013	882.77
76.6972	-0.104877	0.000300766	1.00013	883.081
76.7897	-0.104877	0.000293252	1.00013	883.388
76.8822	-0.104877	0.000286355	1.00013	883.691
76.9747	-0.104877	0.000280067	1.00013	883.99
77.0672	-0.104877	0.000274367	1.00013	884.285
77.1598	-0.104877	0.000269246	1.00013	884.574
77.2523	-0.104877	0.000264669	1.00013	884.858
77.3448	-0.104877	0.000260639	1.00013	885.137
77.4373	-0.104877	0.000257124	1.00013	885.41
77.5298	-0.104877	0.000254095	1.00013	885.676
77.6223	-0.104877	0.000251532	1.00013	885.936
77.7149	-0.104877	0.000249391	1.00013	886.188
77.8074	-0.104877	0.00024765	1.00013	886.431
77.8999	-0.104877	0.000246252	1.00013	886.665
77.9924	-0.104877	0.000245173	1.00013	886.889
78.0849	-0.104877	0.000244361	1.00013	887.102
78.1775	-0.104877	0.000243779	1.00013	887.302
78.27	-0.104877	0.00024338	1.00013	887.488
78.3625	-0.104877	0.000243134	1.00013	887.658
78.455	-0.104877	0.00024299	1.00013	887.809
78.5475	-0.104877	0.00024292	1.00013	887.939
78.64	-0.104877	0.000242893	1.00013	888.045
78.7326	-0.104877	0.000242878	1.00013	888.124
