# Supplementary material for: Gas transport in firn: multiple-tracer characterisation and model intercomparison for NEEM, Northern Greenland
Source: Copernicus journal article supplement (doi:10.5194/acp-12-4259-2012), 2012-05-14
Supplement: Supplementary file 10 [file NEEM08_EU_SIO.xls]

## Sheet: Diffusivities
depth	molecular diffusivity	eddy/dispersion diffusivity
0	1.208e-05	1.6e-05
0.2	1.208e-05	1.5373e-05
0.4	1.208e-05	1.477e-05
0.6	1.208e-05	1.4191e-05
0.8	1.208e-05	1.3634e-05
1	1.208e-05	1.31e-05
1.2	1.208e-05	1.2586e-05
1.4	1.208e-05	1.2093e-05
1.6	1.208e-05	1.1618e-05
1.8	1.208e-05	1.1163e-05
2	1.208e-05	1.0725e-05
2.2	1.209e-05	1.0305e-05
2.4	1.209e-05	9.9005e-06
2.6	1.21e-05	9.5123e-06
2.8	1.21e-05	9.1393e-06
3	1.211e-05	8.781e-06
3.2	1.212e-05	8.4367e-06
3.4	1.212e-05	8.1059e-06
3.6	1.212e-05	7.788e-06
3.8	1.213e-05	7.4827e-06
4	1.213e-05	7.1893e-06
4.2	1.214e-05	6.9074e-06
4.4	1.214e-05	6.6365e-06
4.6	1.214e-05	6.3763e-06
4.8	1.215e-05	6.1263e-06
5	1.215e-05	5.8861e-06
5.2	1.215e-05	5.6553e-06
5.4	1.215e-05	5.4335e-06
5.6	1.216e-05	5.2205e-06
5.8	1.216e-05	5.0158e-06
6	1.216e-05	4.8191e-06
6.2	1.216e-05	4.6301e-06
6.4	1.216e-05	4.4486e-06
6.6	1.216e-05	4.2742e-06
6.8	1.216e-05	4.1066e-06
7	1.216e-05	3.9456e-06
7.2	1.215e-05	3.7908e-06
7.4	1.215e-05	3.6422e-06
7.6	1.215e-05	3.4994e-06
7.8	1.215e-05	3.3622e-06
8	1.212e-05	3.2303e-06
8.2	1.21e-05	3.1037e-06
8.4	1.207e-05	2.982e-06
8.6	1.205e-05	2.8651e-06
8.8	1.202e-05	2.7527e-06
9	1.202e-05	2.6448e-06
9.2	1.201e-05	2.5411e-06
9.4	1.2e-05	2.4414e-06
9.6	1.2e-05	2.3457e-06
9.8	1.197e-05	2.2537e-06
10	1.194e-05	2.1654e-06
10.2	1.191e-05	2.0805e-06
10.4	1.188e-05	1.9989e-06
10.6	1.185e-05	1.9205e-06
10.8	1.184e-05	1.8452e-06
11	1.181e-05	1.7729e-06
11.2	1.178e-05	1.7033e-06
11.4	1.175e-05	1.6365e-06
11.6	1.172e-05	1.5724e-06
11.8	1.169e-05	1.5107e-06
12	1.166e-05	1.4515e-06
12.2	1.163e-05	1.3946e-06
12.4	1.16e-05	1.3399e-06
12.6	1.156e-05	1.2874e-06
12.8	1.151e-05	1.2369e-06
13	1.148e-05	1.1884e-06
13.2	1.145e-05	1.1418e-06
13.4	1.141e-05	1.097e-06
13.6	1.136e-05	1.054e-06
13.8	1.132e-05	1.0127e-06
14	1.129e-05	9.7296e-07
14.2	1.125e-05	9.3481e-07
14.4	1.12e-05	8.9816e-07
14.6	1.116e-05	8.6294e-07
14.8	1.113e-05	8.291e-07
15	1.109e-05	7.9659e-07
15.2	1.104e-05	7.6536e-07
15.4	1.1e-05	7.3535e-07
15.6	1.096e-05	7.0651e-07
15.8	1.091e-05	6.7881e-07
16	1.085e-05	6.522e-07
16.2	1.082e-05	6.2662e-07
16.4	1.078e-05	6.0205e-07
16.6	1.072e-05	5.7845e-07
16.8	1.069e-05	5.5576e-07
17	1.065e-05	5.3397e-07
17.2	1.059e-05	5.1303e-07
17.4	1.053e-05	4.9292e-07
17.6	1.05e-05	4.7359e-07
17.8	1.044e-05	4.5502e-07
18	1.038e-05	4.3718e-07
18.2	1.035e-05	4.2004e-07
18.4	1.029e-05	4.0357e-07
18.6	1.023e-05	3.8774e-07
18.8	1.019e-05	3.7254e-07
19	1.014e-05	3.5793e-07
19.2	1.008e-05	3.439e-07
19.4	1.004e-05	3.3041e-07
19.6	9.989e-06	3.1746e-07
19.8	9.938e-06	3.0501e-07
20	9.885e-06	2.9305e-07
20.2	9.832e-06	2.8156e-07
20.4	9.779e-06	2.7052e-07
20.6	9.726e-06	2.5991e-07
20.8	9.673e-06	2.4972e-07
21	9.621e-06	2.3993e-07
21.2	9.569e-06	2.3052e-07
21.4	9.517e-06	2.2148e-07
21.6	9.466e-06	2.128e-07
21.8	9.415e-06	2.0445e-07
22	9.362e-06	1.9644e-07
22.2	9.309e-06	1.8874e-07
22.4	9.257e-06	1.8133e-07
22.6	9.203e-06	1.7422e-07
22.8	9.152e-06	1.6739e-07
23	9.1e-06	1.6083e-07
23.2	9.049e-06	1.5452e-07
23.4	8.999e-06	1.4846e-07
23.6	8.948e-06	1.4264e-07
23.8	8.896e-06	1.3705e-07
24	8.845e-06	1.3168e-07
24.2	8.793e-06	1.2651e-07
24.4	8.742e-06	1.2155e-07
24.6	8.692e-06	1.1679e-07
24.8	8.641e-06	1.1221e-07
25	8.589e-06	1.0781e-07
25.2	8.538e-06	1.0358e-07
25.4	8.486e-06	9.9519e-08
25.6	8.435e-06	9.5616e-08
25.8	8.383e-06	9.1867e-08
26	8.332e-06	8.8265e-08
26.2	8.282e-06	8.4804e-08
26.4	8.231e-06	8.1479e-08
26.6	8.179e-06	7.8284e-08
26.8	8.128e-06	7.5214e-08
27	8.076e-06	7.2265e-08
27.2	8.023e-06	6.9432e-08
27.4	7.971e-06	6.6709e-08
27.6	7.918e-06	6.4094e-08
27.8	7.866e-06	6.158e-08
28	7.815e-06	5.9166e-08
28.2	7.761e-06	5.6846e-08
28.4	7.708e-06	5.4617e-08
28.6	7.655e-06	5.2475e-08
28.8	7.601e-06	5.0418e-08
29	7.548e-06	4.8441e-08
29.2	7.495e-06	4.6541e-08
29.4	7.441e-06	4.4717e-08
29.6	7.388e-06	4.2963e-08
29.8	7.333e-06	4.1279e-08
30	7.278e-06	3.966e-08
30.2	7.225e-06	3.8105e-08
30.4	7.172e-06	3.6611e-08
30.6	7.118e-06	3.5175e-08
30.8	7.065e-06	3.3796e-08
31	7.012e-06	3.2471e-08
31.2	6.957e-06	3.1198e-08
31.4	6.902e-06	2.9974e-08
31.6	6.85e-06	2.8799e-08
31.8	6.797e-06	2.767e-08
32	6.744e-06	2.6585e-08
32.2	6.691e-06	2.5543e-08
32.4	6.638e-06	2.4541e-08
32.6	6.583e-06	2.3579e-08
32.8	6.529e-06	2.2654e-08
33	6.474e-06	2.1766e-08
33.2	6.421e-06	2.0912e-08
33.4	6.368e-06	2.0092e-08
33.6	6.315e-06	1.9305e-08
33.8	6.263e-06	1.8548e-08
34	6.21e-06	1.782e-08
34.2	6.155e-06	1.7122e-08
34.4	6.101e-06	1.645e-08
34.6	6.048e-06	1.5805e-08
34.8	5.996e-06	1.5186e-08
35	5.944e-06	1.459e-08
35.2	5.892e-06	1.4018e-08
35.4	5.84e-06	1.3468e-08
35.6	5.787e-06	1.294e-08
35.8	5.734e-06	1.2433e-08
36	5.683e-06	1.1945e-08
36.2	5.633e-06	1.1477e-08
36.4	5.583e-06	1.1027e-08
36.6	5.533e-06	1.0595e-08
36.8	5.483e-06	1.0179e-08
37	5.432e-06	9.78e-09
37.2	5.381e-06	9.3966e-09
37.4	5.333e-06	9.0281e-09
37.6	5.285e-06	8.6741e-09
37.8	5.237e-06	8.334e-09
38	5.19e-06	8.0072e-09
38.2	5.142e-06	7.6933e-09
38.4	5.094e-06	7.3916e-09
38.6	5.045e-06	7.1018e-09
38.8	4.999e-06	6.8233e-09
39	4.953e-06	6.5558e-09
39.2	4.907e-06	6.2987e-09
39.4	4.862e-06	6.0517e-09
39.6	4.817e-06	5.8144e-09
39.8	4.77e-06	5.5864e-09
40	4.724e-06	5.3674e-09
40.2	4.678e-06	5.1569e-09
40.4	4.634e-06	4.9547e-09
40.6	4.591e-06	4.7605e-09
40.8	4.548e-06	4.5738e-09
41	4.505e-06	4.3945e-09
41.2	4.462e-06	4.2221e-09
41.4	4.418e-06	4.0566e-09
41.6	4.375e-06	3.8975e-09
41.8	4.333e-06	3.7447e-09
42	4.292e-06	3.5979e-09
42.2	4.251e-06	3.4568e-09
42.4	4.211e-06	3.3213e-09
42.6	4.171e-06	3.191e-09
42.8	4.128e-06	3.0659e-09
43	4.086e-06	2.9457e-09
43.2	4.046e-06	2.8302e-09
43.4	4.006e-06	2.7192e-09
43.6	3.966e-06	2.6126e-09
43.8	3.925e-06	2.5102e-09
44	3.885e-06	2.4117e-09
44.2	3.843e-06	2.3172e-09
44.4	3.801e-06	2.2263e-09
44.6	3.761e-06	2.139e-09
44.8	3.721e-06	2.0551e-09
45	3.681e-06	1.9746e-09
45.2	3.641e-06	1.8971e-09
45.4	3.601e-06	1.8227e-09
45.6	3.559e-06	1.7513e-09
45.8	3.517e-06	1.6826e-09
46	3.477e-06	1.6166e-09
46.2	3.436e-06	1.5532e-09
46.4	3.396e-06	1.4923e-09
46.6	3.356e-06	1.4338e-09
46.8	3.315e-06	1.3776e-09
47	3.273e-06	1.3236e-09
47.2	3.231e-06	1.2717e-09
47.4	3.188e-06	1.2218e-09
47.6	3.147e-06	1.1739e-09
47.8	3.107e-06	1.1279e-09
48	3.066e-06	1.0837e-09
48.2	3.025e-06	1.0412e-09
48.4	2.984e-06	1.0003e-09
48.6	2.941e-06	9.6112e-10
48.8	2.898e-06	9.2343e-10
49	2.856e-06	8.8723e-10
49.2	2.815e-06	8.5244e-10
49.4	2.773e-06	8.1901e-10
49.6	2.732e-06	7.869e-10
49.8	2.69e-06	7.5604e-10
50	2.646e-06	7.264e-10
50.2	2.601e-06	6.9792e-10
50.4	2.558e-06	6.7055e-10
50.6	2.515e-06	6.4426e-10
50.8	2.471e-06	6.19e-10
51	2.427e-06	5.9473e-10
51.2	2.381e-06	5.7141e-10
51.4	2.334e-06	5.49e-10
51.6	2.285e-06	5.2747e-10
51.8	2.238e-06	5.0679e-10
52	2.191e-06	4.8692e-10
52.2	2.143e-06	4.6783e-10
52.4	2.094e-06	4.4948e-10
52.6	2.044e-06	4.3186e-10
52.8	1.992e-06	4.1493e-10
53	1.939e-06	3.9866e-10
53.2	1.887e-06	3.8302e-10
53.4	1.834e-06	3.6801e-10
53.6	1.78e-06	3.5358e-10
53.8	1.726e-06	3.3971e-10
54	1.671e-06	3.2639e-10
54.2	1.613e-06	3.1359e-10
54.4	1.554e-06	3.013e-10
54.6	1.494e-06	2.8948e-10
54.8	1.436e-06	2.7813e-10
55	1.379e-06	2.6723e-10
55.2	1.322e-06	2.5675e-10
55.4	1.268e-06	2.4668e-10
55.6	1.214e-06	2.3701e-10
55.8	1.162e-06	2.2772e-10
56	1.112e-06	2.1879e-10
56.2	1.066e-06	2.1021e-10
56.4	1.023e-06	2.0197e-10
56.6	9.828e-07	1.9405e-10
56.8	9.458e-07	1.8644e-10
57	9.117e-07	1.7913e-10
57.2	8.78e-07	1.721e-10
57.4	8.468e-07	1.6536e-10
57.6	8.179e-07	1.5887e-10
57.8	7.886e-07	1.5264e-10
58	7.588e-07	1.4666e-10
58.2	7.28e-07	1.4091e-10
58.4	6.951e-07	1.3538e-10
58.6	6.603e-07	1.3007e-10
58.8	6.242e-07	1.2497e-10
59	5.868e-07	1.2007e-10
59.2	5.486e-07	1.1536e-10
59.4	5.1e-07	1.1084e-10
59.6	4.711e-07	1.065e-10
59.8	4.313e-07	1.0232e-10
60	3.923e-07	9.8307e-11
60.2	3.541e-07	9.4453e-11
60.4	3.166e-07	9.0749e-11
60.6	2.801e-07	8.7191e-11
60.8	2.459e-07	8.3772e-11
61	2.125e-07	8.0487e-11
61.2	1.799e-07	7.7331e-11
61.4	1.497e-07	7.4299e-11
61.6	1.225e-07	7.1386e-11
61.8	9.877e-08	6.8587e-11
62	7.936e-08	6.5897e-11
62.2	6.495e-08	6.3314e-11
62.4	5.319e-08	6.0831e-11
62.6	4.394e-08	5.8446e-11
62.8	3.672e-08	5.6154e-11
63	3.094e-08	5.3952e-11
63.2	2.602e-08	5.1837e-11
63.4	2.234e-08	4.9804e-11
63.6	1.848e-08	4.7851e-11
63.8	1.543e-08	4.5975e-11
64	1.304e-08	4.4172e-11
64.0859	8.0564e-09	3.0436e-09
64.172	7.2021e-09	2.7209e-09
64.2582	7.287e-09	2.753e-09
64.3447	7.3814e-09	2.7886e-09
64.4313	7.4249e-09	2.8051e-09
64.5181	7.4177e-09	2.8023e-09
64.6051	7.3669e-09	2.7831e-09
64.6923	7.2725e-09	2.7475e-09
64.7797	7.1324e-09	2.6946e-09
64.8673	6.9619e-09	2.6301e-09
64.9551	6.7383e-09	2.5457e-09
65.043	6.4582e-09	2.4398e-09
65.1312	6.117e-09	2.311e-09
65.2195	5.7295e-09	2.1645e-09
65.3081	5.3216e-09	2.0104e-09
65.3968	4.918e-09	1.858e-09
65.4857	4.5196e-09	1.7074e-09
65.5748	4.132e-09	1.561e-09
65.6642	3.756e-09	1.419e-09
65.7537	3.3924e-09	1.2816e-09
65.8434	3.052e-09	1.153e-09
65.9333	2.7544e-09	1.0406e-09
66.0234	2.4982e-09	9.438e-10
66.1137	2.279e-09	8.6099e-10
66.2042	2.0961e-09	7.9189e-10
66.2949	1.9393e-09	7.3266e-10
66.3858	1.7935e-09	6.7755e-10
66.4769	1.6577e-09	6.2627e-10
66.5682	1.5365e-09	5.8048e-10
66.6598	1.4291e-09	5.399e-10
66.7515	1.3318e-09	5.0316e-10
66.8434	1.2433e-09	4.697e-10
66.9355	1.1772e-09	4.4475e-10
67.0278	1.1322e-09	4.2775e-10
67.1204	1.1047e-09	4.1733e-10
67.2131	1.1025e-09	4.1651e-10
67.3061	1.1199e-09	4.2309e-10
67.3992	1.1693e-09	4.4174e-10
67.4926	1.252e-09	4.7299e-10
67.5861	1.366e-09	5.1604e-10
67.6799	1.5039e-09	5.6814e-10
67.7739	1.6686e-09	6.3039e-10
67.8681	1.816e-09	6.8605e-10
67.9625	1.935e-09	7.3102e-10
68.0571	2.0293e-09	7.6666e-10
68.152	2.1026e-09	7.9436e-10
68.247	2.1534e-09	8.1355e-10
68.3423	2.181e-09	8.2397e-10
68.4377	2.1687e-09	8.1931e-10
68.5334	2.1121e-09	7.9792e-10
68.6293	2.0097e-09	7.5926e-10
68.7256	1.8595e-09	7.025e-10
68.8222	1.6802e-09	6.3477e-10
68.9193	1.5133e-09	5.7171e-10
69.0171	1.3623e-09	5.1467e-10
69.1154	1.231e-09	4.6504e-10
69.2143	1.1199e-09	4.2309e-10
69.3138	1.0285e-09	3.8854e-10
69.4139	9.6459e-10	3.6441e-10
69.5145	9.2467e-10	3.4933e-10
69.6157	9.1015e-10	3.4385e-10
69.7174	9.1959e-10	3.4741e-10
69.8197	9.4789e-10	3.5811e-10
69.9225	9.7039e-10	3.6661e-10
70.0259	9.8418e-10	3.7182e-10
70.1297	9.9072e-10	3.7428e-10
70.2341	9.958e-10	3.762e-10
70.339	9.9797e-10	3.7702e-10
70.4444	9.958e-10	3.762e-10
70.5503	9.9289e-10	3.7511e-10
70.6567	9.8709e-10	3.7291e-10
70.7636	9.7257e-10	3.6743e-10
70.871	9.5951e-10	3.6249e-10
70.9788	9.537e-10	3.603e-10
71.0871	9.5443e-10	3.6057e-10
71.1958	9.6169e-10	3.6332e-10
71.3049	9.762e-10	3.688e-10
71.4145	9.958e-10	3.762e-10
71.5245	1.0168e-09	3.8415e-10
71.635	1.0393e-09	3.9265e-10
71.7458	1.0647e-09	4.0225e-10
71.8571	1.0996e-09	4.1541e-10
71.9687	1.1402e-09	4.3077e-10
72.0807	1.1881e-09	4.4887e-10
72.1931	1.2447e-09	4.7025e-10
72.3058	1.3086e-09	4.9438e-10
72.4189	1.3761e-09	5.1988e-10
72.5323	1.4472e-09	5.4675e-10
72.6461	1.5213e-09	5.7472e-10
72.7602	1.5982e-09	6.0379e-10
72.8746	1.678e-09	6.3395e-10
72.9893	1.7586e-09	6.6439e-10
73.1043	1.8392e-09	6.9482e-10
73.2196	1.9205e-09	7.2553e-10
73.3352	1.9974e-09	7.546e-10
73.451	2.0671e-09	7.8092e-10
73.5671	2.1331e-09	8.0587e-10
73.6835	2.197e-09	8.3e-10
73.8001	2.2587e-09	8.5331e-10
73.9169	2.3211e-09	8.7689e-10
74.0339	2.3857e-09	9.013e-10
74.1512	2.4488e-09	9.2515e-10
74.2686	2.5091e-09	9.4791e-10
74.3863	2.5526e-09	9.6436e-10
74.5041	2.5831e-09	9.7588e-10
74.6221	2.6049e-09	9.841e-10
74.7402	2.6194e-09	9.8959e-10
74.8585	2.6259e-09	9.9206e-10
74.977	2.631e-09	9.9397e-10
75.0956	2.6347e-09	9.9535e-10
75.2143	2.6267e-09	9.9233e-10
75.3331	2.6093e-09	9.8575e-10
75.452	2.5846e-09	9.7643e-10
75.5711	2.5548e-09	9.6518e-10
75.6902	2.5163e-09	9.5065e-10
75.8093	2.475e-09	9.3502e-10
75.9283	2.4278e-09	9.172e-10
76.0474	2.3755e-09	8.9746e-10
76.1664	2.3197e-09	8.7634e-10
76.2854	2.263e-09	8.5496e-10
76.4043	2.2021e-09	8.3192e-10
76.5231	2.1368e-09	8.0724e-10
76.642	2.0664e-09	7.8065e-10
76.7608	1.9909e-09	7.5213e-10
76.8795	1.903e-09	7.1895e-10
76.9982	1.8058e-09	6.8221e-10
77.1168	1.6991e-09	6.419e-10
77.2355	1.5837e-09	5.983e-10
77.354	1.4589e-09	5.5114e-10
77.4726	1.3355e-09	5.0453e-10
77.591	1.2164e-09	4.5956e-10
77.7095	1.101e-09	4.1596e-10
77.8279	9.9797e-10	3.7702e-10
77.9463	9.1451e-10	3.4549e-10
78.0646	8.5209e-10	3.2191e-10
78.1829	8.0709e-10	3.0491e-10
78.3011	7.7007e-10	2.9093e-10
78.4193	7.4612e-10	2.8188e-10
78.5375	6.9895e-10	2.6405e-10
78.6556	0	0
78.7737	0	0

## Sheet: Profiles
depth	CO2	CH4	SF6	CFC_11	CFC_12	CFC_113	HFC_134a	CH3CCl3	14CO2	15N/14N	CCl4	d15N
0	382.541	1837.43	6.64668	245.838	536.861	78.1257	52.798	11.3385	487.426	1	91.6751	0
0.2	382.665	1837.71	6.64448	245.858	536.876	78.132	52.7536	11.3733	487.6	1	91.687	0.00047
0.4	382.791	1838	6.64221	245.878	536.891	78.1384	52.7082	11.4091	487.775	1	91.6993	0.00096
0.6	382.916	1838.29	6.63988	245.899	536.906	78.1449	52.662	11.4459	487.95	1	91.7118	0.00145
0.8	383.041	1838.58	6.63748	245.921	536.922	78.1515	52.6151	11.4837	488.125	1	91.7245	0.00196
1	383.166	1838.87	6.63502	245.942	536.937	78.1582	52.5673	11.5226	488.299	1	91.7376	0.00247
1.2	383.29	1839.16	6.63249	245.965	536.953	78.165	52.5187	11.5626	488.474	1	91.7508	0.00299
1.4	383.413	1839.46	6.62989	245.987	536.969	78.172	52.4693	11.6036	488.647	1	91.7644	0.00353
1.6	383.536	1839.75	6.62722	246.01	536.985	78.179	52.4191	11.6457	488.819	1	91.7782	0.00407
1.8	383.658	1840.05	6.62449	246.034	537.001	78.1861	52.3681	11.6889	488.991	1	91.7923	0.00462
2	383.78	1840.34	6.62168	246.057	537.018	78.1933	52.3164	11.7333	489.162	1.00001	91.8066	0.00518
2.2	383.9	1840.64	6.6188	246.082	537.034	78.2006	52.2639	11.7788	489.331	1.00001	91.8212	0.00575
2.4	384.019	1840.93	6.61585	246.106	537.051	78.208	52.2106	11.8254	489.499	1.00001	91.8361	0.00633
2.6	384.137	1841.23	6.61283	246.132	537.068	78.2155	52.1566	11.8733	489.666	1.00001	91.8512	0.00692
2.8	384.253	1841.52	6.60973	246.157	537.084	78.223	52.1018	11.9222	489.831	1.00001	91.8666	0.00752
3	384.369	1841.82	6.60656	246.183	537.101	78.2307	52.0464	11.9724	489.994	1.00001	91.8822	0.00812
3.2	384.482	1842.11	6.60332	246.209	537.118	78.2384	51.9902	12.0237	490.155	1.00001	91.8981	0.00874
3.4	384.594	1842.4	6.60001	246.236	537.135	78.2462	51.9332	12.0763	490.315	1.00001	91.9143	0.00936
3.6	384.705	1842.69	6.59662	246.263	537.152	78.254	51.8756	12.1301	490.472	1.00001	91.9307	0.01
3.8	384.813	1842.99	6.59316	246.291	537.168	78.2619	51.8173	12.1851	490.627	1.00001	91.9474	0.01064
4	384.92	1843.27	6.58963	246.319	537.185	78.2699	51.7583	12.2413	490.78	1.00001	91.9643	0.01129
4.2	385.025	1843.56	6.58602	246.347	537.202	78.278	51.6986	12.2988	490.93	1.00001	91.9814	0.01195
4.4	385.128	1843.85	6.58233	246.375	537.219	78.2861	51.6382	12.3575	491.078	1.00001	91.9989	0.01262
4.6	385.228	1844.13	6.57858	246.404	537.236	78.2942	51.5772	12.4175	491.224	1.00001	92.0165	0.01329
4.8	385.327	1844.42	6.57474	246.434	537.252	78.3024	51.5156	12.4787	491.367	1.00001	92.0345	0.01398
5	385.423	1844.7	6.57084	246.463	537.269	78.3106	51.4533	12.5412	491.506	1.00001	92.0526	0.01467
5.2	385.517	1844.97	6.56686	246.493	537.285	78.3189	51.3904	12.605	491.644	1.00002	92.071	0.01537
5.4	385.609	1845.25	6.56281	246.524	537.302	78.3273	51.3269	12.67	491.778	1.00002	92.0896	0.01607
5.6	385.699	1845.52	6.55869	246.554	537.318	78.3356	51.2627	12.7364	491.909	1.00002	92.1085	0.01679
5.8	385.785	1845.8	6.55449	246.585	537.334	78.344	51.198	12.804	492.037	1.00002	92.1276	0.01751
6	385.87	1846.07	6.55022	246.616	537.35	78.3524	51.1327	12.8728	492.163	1.00002	92.1469	0.01824
6.2	385.952	1846.33	6.54588	246.648	537.365	78.3609	51.0668	12.943	492.285	1.00002	92.1665	0.01898
6.4	386.031	1846.6	6.54147	246.68	537.381	78.3693	51.0003	13.0145	492.404	1.00002	92.1863	0.01972
6.6	386.108	1846.86	6.53699	246.712	537.396	78.3778	50.9333	13.0872	492.52	1.00002	92.2063	0.02047
6.8	386.182	1847.11	6.53244	246.744	537.411	78.3863	50.8657	13.1612	492.632	1.00002	92.2265	0.02122
7	386.254	1847.37	6.52782	246.777	537.426	78.3948	50.7976	13.2365	492.741	1.00002	92.2469	0.02199
7.2	386.322	1847.62	6.52314	246.81	537.441	78.4032	50.7289	13.3131	492.847	1.00002	92.2676	0.02276
7.4	386.389	1847.87	6.51838	246.843	537.455	78.4117	50.6596	13.391	492.95	1.00002	92.2884	0.02353
7.6	386.452	1848.12	6.51356	246.876	537.469	78.4202	50.5899	13.4702	493.05	1.00002	92.3095	0.02431
7.8	386.513	1848.36	6.50867	246.91	537.483	78.4287	50.5196	13.5506	493.146	1.00003	92.3308	0.0251
8	386.571	1848.6	6.50372	246.944	537.496	78.4372	50.4488	13.6323	493.239	1.00003	92.3523	0.02589
8.2	386.626	1848.83	6.4987	246.978	537.509	78.4456	50.3773	13.7154	493.329	1.00003	92.374	0.02669
8.4	386.679	1849.07	6.4936	247.012	537.522	78.4541	50.3053	13.7999	493.415	1.00003	92.3959	0.02749
8.6	386.729	1849.3	6.48844	247.046	537.534	78.4625	50.2326	13.8857	493.499	1.00003	92.4181	0.0283
8.8	386.776	1849.52	6.48321	247.081	537.546	78.471	50.1594	13.9729	493.579	1.00003	92.4404	0.02911
9	386.821	1849.75	6.47792	247.116	537.558	78.4794	50.0856	14.0614	493.656	1.00003	92.463	0.02992
9.2	386.863	1849.96	6.47257	247.151	537.569	78.4878	50.0114	14.1512	493.73	1.00003	92.4858	0.03075
9.4	386.902	1850.18	6.46716	247.187	537.58	78.4961	49.9366	14.2422	493.801	1.00003	92.5087	0.03157
9.6	386.939	1850.39	6.46169	247.222	537.591	78.5044	49.8613	14.3345	493.868	1.00003	92.5319	0.0324
9.8	386.973	1850.6	6.45616	247.258	537.601	78.5127	49.7855	14.428	493.932	1.00003	92.5552	0.03324
10	387.004	1850.81	6.45057	247.294	537.61	78.521	49.7091	14.5229	493.994	1.00003	92.5787	0.03408
10.2	387.033	1851.01	6.44492	247.33	537.62	78.5292	49.632	14.6192	494.052	1.00003	92.6025	0.03492
10.4	387.059	1851.21	6.43921	247.366	537.628	78.5374	49.5544	14.7168	494.108	1.00004	92.6264	0.03577
10.6	387.083	1851.4	6.43343	247.402	537.637	78.5455	49.4762	14.8158	494.16	1.00004	92.6506	0.03662
10.8	387.104	1851.59	6.4276	247.439	537.644	78.5536	49.3975	14.916	494.21	1.00004	92.6749	0.03747
11	387.122	1851.78	6.42172	247.475	537.652	78.5617	49.3182	15.0176	494.256	1.00004	92.6994	0.03833
11.2	387.138	1851.96	6.41578	247.512	537.659	78.5696	49.2382	15.1204	494.3	1.00004	92.7242	0.03919
11.4	387.152	1852.14	6.40978	247.549	537.665	78.5776	49.1577	15.2246	494.341	1.00004	92.7491	0.04006
11.6	387.163	1852.32	6.40373	247.586	537.671	78.5855	49.0766	15.3301	494.38	1.00004	92.7742	0.04092
11.8	387.172	1852.49	6.39763	247.623	537.676	78.5934	48.995	15.437	494.415	1.00004	92.7995	0.04179
12	387.178	1852.66	6.39147	247.66	537.681	78.6012	48.9127	15.5451	494.449	1.00004	92.825	0.04267
12.2	387.182	1852.83	6.38526	247.698	537.685	78.6089	48.8298	15.6545	494.479	1.00004	92.8506	0.04354
12.4	387.184	1852.99	6.379	247.735	537.689	78.6166	48.7463	15.7652	494.507	1.00004	92.8765	0.04442
12.6	387.184	1853.15	6.37269	247.773	537.692	78.6242	48.6622	15.8773	494.533	1.00005	92.9025	0.04531
12.8	387.181	1853.3	6.36632	247.811	537.694	78.6318	48.5774	15.9907	494.556	1.00005	92.9287	0.04619
13	387.176	1853.45	6.3599	247.849	537.696	78.6393	48.492	16.1055	494.577	1.00005	92.9551	0.04708
13.2	387.169	1853.6	6.35344	247.887	537.698	78.6468	48.406	16.2215	494.596	1.00005	92.9817	0.04797
13.4	387.16	1853.74	6.34693	247.925	537.699	78.6542	48.3194	16.3388	494.612	1.00005	93.0085	0.04886
13.6	387.149	1853.88	6.34036	247.963	537.699	78.6615	48.2322	16.4574	494.626	1.00005	93.0354	0.04976
13.8	387.136	1854.02	6.33375	248.001	537.699	78.6688	48.1442	16.5774	494.638	1.00005	93.0626	0.05065
14	387.121	1854.15	6.3271	248.04	537.698	78.6759	48.0557	16.6986	494.648	1.00005	93.0898	0.05155
14.2	387.103	1854.28	6.32041	248.078	537.696	78.683	47.9666	16.821	494.656	1.00005	93.1173	0.05245
14.4	387.084	1854.41	6.31367	248.117	537.694	78.6901	47.8768	16.9447	494.662	1.00005	93.1449	0.05335
14.6	387.063	1854.53	6.30689	248.155	537.691	78.6971	47.7865	17.0697	494.666	1.00005	93.1727	0.05426
14.8	387.041	1854.65	6.30007	248.194	537.688	78.704	47.6955	17.1958	494.668	1.00006	93.2006	0.05517
15	387.016	1854.76	6.29322	248.232	537.684	78.7108	47.6041	17.3231	494.669	1.00006	93.2287	0.05607
15.2	386.99	1854.87	6.28633	248.271	537.679	78.7175	47.512	17.4515	494.667	1.00006	93.2569	0.05698
15.4	386.962	1854.98	6.27941	248.31	537.674	78.7242	47.4194	17.5812	494.664	1.00006	93.2852	0.0579
15.6	386.932	1855.09	6.27246	248.349	537.669	78.7307	47.3263	17.7118	494.66	1.00006	93.3136	0.05881
15.8	386.901	1855.19	6.26547	248.387	537.662	78.7372	47.2327	17.8436	494.653	1.00006	93.3422	0.05972
16	386.868	1855.28	6.25845	248.426	537.655	78.7436	47.1384	17.9765	494.646	1.00006	93.3709	0.06064
16.2	386.834	1855.38	6.25141	248.465	537.647	78.7499	47.0437	18.1105	494.637	1.00006	93.3997	0.06156
16.4	386.799	1855.47	6.24435	248.504	537.639	78.7562	46.9487	18.2453	494.626	1.00006	93.4286	0.06248
16.6	386.762	1855.55	6.23726	248.542	537.63	78.7623	46.8531	18.3812	494.614	1.00006	93.4576	0.0634
16.8	386.723	1855.64	6.23014	248.581	537.621	78.7683	46.757	18.518	494.601	1.00006	93.4866	0.06432
17	386.683	1855.72	6.22302	248.62	537.61	78.7742	46.6606	18.6558	494.586	1.00007	93.5158	0.06525
17.2	386.643	1855.79	6.21586	248.658	537.6	78.7801	46.5637	18.7945	494.571	1.00007	93.545	0.06617
17.4	386.6	1855.87	6.20868	248.697	537.588	78.7858	46.4662	18.9343	494.554	1.00007	93.5743	0.0671
17.6	386.557	1855.93	6.20148	248.736	537.576	78.7915	46.3683	19.0751	494.536	1.00007	93.6038	0.06802
17.8	386.512	1856	6.19426	248.774	537.563	78.797	46.2699	19.2169	494.517	1.00007	93.6333	0.06895
18	386.467	1856.06	6.18701	248.813	537.55	78.8025	46.171	19.3598	494.497	1.00007	93.6629	0.06988
18.2	386.42	1856.12	6.17974	248.852	537.536	78.8079	46.0716	19.5036	494.476	1.00007	93.6925	0.07081
18.4	386.372	1856.18	6.17245	248.89	537.521	78.8131	45.9718	19.6483	494.454	1.00007	93.7223	0.07174
18.6	386.323	1856.23	6.16513	248.929	537.506	78.8183	45.8715	19.7941	494.432	1.00007	93.7521	0.07267
18.8	386.274	1856.28	6.1578	248.967	537.49	78.8234	45.7706	19.941	494.408	1.00007	93.7821	0.07361
19	386.223	1856.33	6.15045	249.006	537.474	78.8284	45.6694	20.0887	494.384	1.00007	93.812	0.07454
19.2	386.171	1856.38	6.14308	249.044	537.456	78.8332	45.5676	20.2374	494.359	1.00008	93.8421	0.07548
19.4	386.119	1856.42	6.13568	249.083	537.439	78.838	45.4654	20.3872	494.333	1.00008	93.8723	0.07641
19.6	386.065	1856.46	6.12828	249.121	537.42	78.8427	45.3628	20.5378	494.306	1.00008	93.9025	0.07735
19.8	386.011	1856.49	6.12085	249.159	537.401	78.8473	45.2597	20.6894	494.279	1.00008	93.9327	0.07829
20	385.956	1856.52	6.1134	249.198	537.381	78.8517	45.1562	20.842	494.251	1.00008	93.963	0.07922
20.2	385.901	1856.55	6.10594	249.236	537.361	78.8561	45.0522	20.9956	494.223	1.00008	93.9934	0.08016
20.4	385.844	1856.58	6.09846	249.274	537.339	78.8603	44.9477	21.1502	494.194	1.00008	94.0239	0.0811
20.6	385.787	1856.6	6.09095	249.313	537.318	78.8645	44.8428	21.3057	494.165	1.00008	94.0544	0.08204
20.8	385.73	1856.63	6.08343	249.351	537.295	78.8686	44.7374	21.4623	494.135	1.00008	94.085	0.08298
21	385.672	1856.64	6.07589	249.389	537.272	78.8725	44.6315	21.6198	494.105	1.00008	94.1156	0.08392
21.2	385.613	1856.66	6.06834	249.427	537.248	78.8763	44.5253	21.7783	494.074	1.00008	94.1463	0.08487
21.4	385.553	1856.67	6.06076	249.466	537.224	78.8801	44.4185	21.9377	494.043	1.00009	94.1771	0.08581
21.6	385.493	1856.68	6.05317	249.504	537.199	78.8837	44.3114	22.0981	494.012	1.00009	94.2078	0.08675
21.8	385.433	1856.69	6.04557	249.542	537.173	78.8872	44.2039	22.2595	493.98	1.00009	94.2387	0.08769
22	385.372	1856.7	6.03795	249.58	537.147	78.8906	44.0959	22.4218	493.948	1.00009	94.2696	0.08864
22.2	385.311	1856.7	6.03031	249.618	537.119	78.8939	43.9875	22.5851	493.916	1.00009	94.3005	0.08958
22.4	385.249	1856.7	6.02265	249.656	537.092	78.8971	43.8786	22.7494	493.883	1.00009	94.3315	0.09053
22.6	385.187	1856.7	6.01498	249.694	537.063	78.9001	43.7694	22.9146	493.85	1.00009	94.3625	0.09147
22.8	385.124	1856.7	6.0073	249.732	537.034	78.9031	43.6598	23.0808	493.817	1.00009	94.3936	0.09242
23	385.062	1856.69	5.99959	249.77	537.004	78.9059	43.5497	23.2479	493.784	1.00009	94.4247	0.09337
23.2	384.998	1856.68	5.99187	249.808	536.974	78.9086	43.4393	23.416	493.751	1.00009	94.4558	0.09431
23.4	384.935	1856.67	5.98414	249.845	536.943	78.9112	43.3285	23.585	493.717	1.0001	94.487	0.09526
23.6	384.871	1856.66	5.9764	249.883	536.911	78.9137	43.2173	23.755	493.684	1.0001	94.5182	0.09621
23.8	384.807	1856.65	5.96864	249.921	536.878	78.9161	43.1057	23.9258	493.65	1.0001	94.5494	0.09716
24	384.743	1856.63	5.96086	249.959	536.845	78.9183	42.9938	24.0977	493.617	1.0001	94.5806	0.0981
24.2	384.679	1856.61	5.95307	249.996	536.811	78.9204	42.8815	24.2704	493.583	1.0001	94.6119	0.09905
24.4	384.614	1856.59	5.94527	250.034	536.777	78.9224	42.7689	24.4441	493.549	1.0001	94.6432	0.1
24.6	384.55	1856.57	5.93745	250.071	536.741	78.9243	42.6559	24.6187	493.515	1.0001	94.6745	0.10095
24.8	384.485	1856.54	5.92963	250.109	536.706	78.926	42.5426	24.7943	493.482	1.0001	94.7058	0.1019
25	384.42	1856.51	5.92178	250.146	536.669	78.9276	42.4289	24.9708	493.448	1.0001	94.7372	0.10285
25.2	384.355	1856.49	5.91392	250.184	536.632	78.9291	42.3149	25.1482	493.414	1.0001	94.7686	0.1038
25.4	384.29	1856.46	5.90605	250.221	536.593	78.9305	42.2005	25.3266	493.381	1.0001	94.8	0.10475
25.6	384.224	1856.42	5.89817	250.259	536.555	78.9317	42.0858	25.5059	493.347	1.00011	94.8314	0.1057
25.8	384.159	1856.39	5.89027	250.296	536.515	78.9328	41.9708	25.6862	493.313	1.00011	94.8628	0.10665
26	384.094	1856.35	5.88235	250.333	536.475	78.9337	41.8555	25.8674	493.28	1.00011	94.8943	0.1076
26.2	384.028	1856.32	5.87442	250.37	536.434	78.9346	41.7398	26.0495	493.247	1.00011	94.9257	0.10855
26.4	383.963	1856.28	5.86648	250.407	536.393	78.9352	41.6238	26.2325	493.214	1.00011	94.9572	0.10951
26.6	383.898	1856.23	5.85853	250.444	536.35	78.9358	41.5076	26.4165	493.181	1.00011	94.9887	0.11046
26.8	383.832	1856.19	5.85056	250.481	536.307	78.9362	41.391	26.6015	493.148	1.00011	95.0201	0.11141
27	383.767	1856.15	5.84258	250.518	536.263	78.9364	41.2741	26.7874	493.115	1.00011	95.0516	0.11236
27.2	383.702	1856.1	5.83458	250.555	536.219	78.9365	41.1569	26.9743	493.082	1.00011	95.0831	0.11332
27.4	383.637	1856.06	5.82657	250.592	536.174	78.9365	41.0394	27.1621	493.05	1.00011	95.1147	0.11427
27.6	383.572	1856.01	5.81855	250.629	536.127	78.9363	40.9216	27.351	493.018	1.00012	95.1462	0.11522
27.8	383.507	1855.96	5.8105	250.666	536.081	78.936	40.8034	27.5408	492.986	1.00012	95.1777	0.11617
28	383.442	1855.91	5.80245	250.702	536.033	78.9355	40.685	27.7316	492.954	1.00012	95.2093	0.11713
28.2	383.377	1855.85	5.79437	250.739	535.985	78.9349	40.5663	27.9233	492.922	1.00012	95.2408	0.11808
28.4	383.312	1855.8	5.78629	250.776	535.936	78.9341	40.4472	28.1161	492.891	1.00012	95.2724	0.11903
28.6	383.247	1855.74	5.77818	250.812	535.886	78.9331	40.3279	28.3099	492.86	1.00012	95.304	0.11999
28.8	383.183	1855.69	5.77006	250.849	535.835	78.932	40.2082	28.5047	492.829	1.00012	95.3355	0.12094
29	383.118	1855.63	5.76192	250.885	535.784	78.9308	40.0883	28.7006	492.798	1.00012	95.3671	0.12189
29.2	383.054	1855.57	5.75377	250.922	535.731	78.9293	39.968	28.8974	492.768	1.00012	95.3988	0.12285
29.4	382.99	1855.51	5.7456	250.958	535.678	78.9277	39.8475	29.0953	492.738	1.00012	95.4304	0.1238
29.6	382.926	1855.45	5.73741	250.994	535.624	78.926	39.7266	29.2943	492.708	1.00012	95.462	0.12476
29.8	382.862	1855.38	5.7292	251.031	535.57	78.924	39.6054	29.4943	492.678	1.00013	95.4936	0.12571
30	382.798	1855.32	5.72097	251.067	535.514	78.9219	39.484	29.6954	492.649	1.00013	95.5253	0.12666
30.2	382.735	1855.25	5.71273	251.103	535.458	78.9197	39.3622	29.8976	492.62	1.00013	95.557	0.12762
30.4	382.672	1855.19	5.70447	251.139	535.4	78.9172	39.2401	30.1008	492.591	1.00013	95.5886	0.12857
30.6	382.608	1855.12	5.69619	251.175	535.342	78.9146	39.1177	30.3051	492.563	1.00013	95.6203	0.12953
30.8	382.546	1855.05	5.68789	251.211	535.283	78.9117	38.9951	30.5105	492.535	1.00013	95.652	0.13048
31	382.483	1854.98	5.67957	251.247	535.224	78.9087	38.8721	30.7169	492.507	1.00013	95.6837	0.13144
31.2	382.42	1854.91	5.67124	251.283	535.163	78.9055	38.7489	30.9245	492.479	1.00013	95.7154	0.13239
31.4	382.358	1854.84	5.66288	251.319	535.101	78.9022	38.6253	31.1332	492.452	1.00013	95.7471	0.13335
31.6	382.296	1854.77	5.6545	251.354	535.039	78.8986	38.5014	31.3429	492.425	1.00013	95.7788	0.1343
31.8	382.234	1854.7	5.64611	251.39	534.975	78.8948	38.3773	31.5538	492.399	1.00014	95.8105	0.13525
32	382.172	1854.63	5.63769	251.426	534.911	78.8909	38.2529	31.7658	492.372	1.00014	95.8423	0.13621
32.2	382.11	1854.55	5.62926	251.461	534.846	78.8867	38.1282	31.9788	492.347	1.00014	95.874	0.13716
32.4	382.049	1854.48	5.62081	251.497	534.78	78.8823	38.0032	32.193	492.321	1.00014	95.9057	0.13812
32.6	381.988	1854.4	5.61233	251.532	534.713	78.8778	37.878	32.4084	492.296	1.00014	95.9375	0.13907
32.8	381.927	1854.32	5.60384	251.567	534.645	78.873	37.7524	32.6249	492.271	1.00014	95.9693	0.14003
33	381.867	1854.25	5.59532	251.603	534.576	78.868	37.6265	32.8426	492.247	1.00014	96.001	0.14098
33.2	381.806	1854.17	5.58678	251.638	534.506	78.8628	37.5003	33.0615	492.223	1.00014	96.0328	0.14194
33.4	381.746	1854.09	5.57822	251.673	534.435	78.8573	37.3738	33.2815	492.199	1.00014	96.0646	0.14289
33.6	381.686	1854.01	5.56963	251.708	534.363	78.8517	37.247	33.5027	492.175	1.00014	96.0964	0.14385
33.8	381.626	1853.93	5.56103	251.743	534.29	78.8458	37.12	33.7251	492.152	1.00014	96.1282	0.1448
34	381.567	1853.85	5.5524	251.778	534.216	78.8397	36.9926	33.9486	492.13	1.00015	96.16	0.14576
34.2	381.508	1853.77	5.54375	251.813	534.141	78.8334	36.865	34.1734	492.107	1.00015	96.1918	0.14671
34.4	381.449	1853.69	5.53508	251.847	534.065	78.8269	36.737	34.3994	492.085	1.00015	96.2237	0.14767
34.6	381.39	1853.61	5.52638	251.882	533.988	78.8201	36.6087	34.6267	492.064	1.00015	96.2555	0.14862
34.8	381.331	1853.52	5.51766	251.917	533.91	78.813	36.4802	34.8551	492.043	1.00015	96.2874	0.14958
35	381.273	1853.44	5.50892	251.951	533.831	78.8058	36.3513	35.0848	492.022	1.00015	96.3192	0.15053
35.2	381.215	1853.36	5.50016	251.986	533.75	78.7982	36.2222	35.3156	492.002	1.00015	96.3511	0.15149
35.4	381.157	1853.27	5.49137	252.02	533.669	78.7905	36.0928	35.5477	491.982	1.00015	96.3829	0.15244
35.6	381.099	1853.19	5.48255	252.054	533.587	78.7825	35.9631	35.781	491.962	1.00015	96.4148	0.1534
35.8	381.042	1853.1	5.47372	252.088	533.503	78.7742	35.8331	36.0156	491.943	1.00015	96.4467	0.15435
36	380.985	1853.02	5.46486	252.122	533.419	78.7657	35.7028	36.2515	491.924	1.00016	96.4786	0.15531
36.2	380.928	1852.93	5.45597	252.156	533.333	78.7569	35.5722	36.4885	491.905	1.00016	96.5105	0.15626
36.4	380.871	1852.85	5.44707	252.19	533.246	78.7478	35.4414	36.7267	491.887	1.00016	96.5423	0.15722
36.6	380.815	1852.76	5.43814	252.223	533.158	78.7385	35.3103	36.9662	491.87	1.00016	96.5742	0.15817
36.8	380.758	1852.67	5.42919	252.257	533.069	78.7289	35.179	37.2068	491.852	1.00016	96.606	0.15913
37	380.702	1852.59	5.42022	252.29	532.979	78.7191	35.0474	37.4487	491.836	1.00016	96.6379	0.16008
37.2	380.647	1852.5	5.41122	252.324	532.888	78.7089	34.9155	37.6918	491.819	1.00016	96.6698	0.16104
37.4	380.591	1852.41	5.4022	252.357	532.795	78.6985	34.7834	37.9361	491.803	1.00016	96.7016	0.16199
37.6	380.536	1852.33	5.39315	252.39	532.701	78.6878	34.651	38.1816	491.787	1.00016	96.7335	0.16295
37.8	380.481	1852.24	5.38409	252.423	532.606	78.6768	34.5185	38.4283	491.772	1.00016	96.7653	0.1639
38	380.426	1852.15	5.37501	252.455	532.51	78.6656	34.3857	38.6761	491.757	1.00016	96.7971	0.16486
38.2	380.371	1852.06	5.36591	252.488	532.413	78.654	34.2527	38.9251	491.743	1.00017	96.8289	0.16581
38.4	380.317	1851.98	5.35678	252.52	532.314	78.6422	34.1194	39.1753	491.728	1.00017	96.8607	0.16677
38.6	380.263	1851.89	5.34763	252.553	532.215	78.63	33.9859	39.4267	491.715	1.00017	96.8924	0.16772
38.8	380.209	1851.8	5.33846	252.585	532.114	78.6176	33.8522	39.6792	491.701	1.00017	96.9241	0.16868
39	380.155	1851.71	5.32927	252.617	532.012	78.6048	33.7184	39.9329	491.688	1.00017	96.9559	0.16963
39.2	380.101	1851.63	5.32007	252.648	531.908	78.5918	33.5843	40.1878	491.676	1.00017	96.9875	0.17058
39.4	380.048	1851.54	5.31084	252.68	531.804	78.5784	33.45	40.4437	491.664	1.00017	97.0192	0.17154
39.6	379.995	1851.45	5.30159	252.711	531.698	78.5648	33.3156	40.7007	491.652	1.00017	97.0508	0.17249
39.8	379.942	1851.36	5.29233	252.743	531.591	78.5508	33.181	40.9588	491.64	1.00017	97.0824	0.17345
40	379.889	1851.28	5.28304	252.774	531.483	78.5365	33.0462	41.2182	491.629	1.00017	97.114	0.1744
40.2	379.836	1851.19	5.27373	252.805	531.373	78.5219	32.9112	41.4787	491.619	1.00018	97.1455	0.17536
40.4	379.784	1851.1	5.2644	252.835	531.262	78.507	32.776	41.7403	491.608	1.00018	97.177	0.17631
40.6	379.732	1851.02	5.25506	252.866	531.15	78.4917	32.6406	42.003	491.598	1.00018	97.2085	0.17726
40.8	379.68	1850.93	5.2457	252.896	531.037	78.4761	32.5052	42.2666	491.589	1.00018	97.2399	0.17822
41	379.628	1850.84	5.23632	252.926	530.922	78.4602	32.3696	42.5314	491.579	1.00018	97.2713	0.17917
41.2	379.576	1850.76	5.22693	252.956	530.806	78.444	32.2339	42.7971	491.571	1.00018	97.3026	0.18013
41.4	379.525	1850.67	5.21751	252.985	530.689	78.4274	32.0981	43.0639	491.562	1.00018	97.3339	0.18108
41.6	379.473	1850.59	5.20809	253.014	530.57	78.4105	31.9621	43.3317	491.554	1.00018	97.3651	0.18203
41.8	379.422	1850.5	5.19864	253.044	530.451	78.3932	31.8261	43.6006	491.546	1.00018	97.3963	0.18299
42	379.371	1850.42	5.18918	253.072	530.329	78.3756	31.6899	43.8704	491.538	1.00018	97.4274	0.18394
42.2	379.32	1850.33	5.17971	253.101	530.207	78.3577	31.5537	44.1411	491.531	1.00018	97.4585	0.1849
42.4	379.27	1850.25	5.17023	253.129	530.083	78.3394	31.4174	44.4127	491.524	1.00019	97.4895	0.18585
42.6	379.219	1850.16	5.16073	253.157	529.958	78.3208	31.2811	44.6852	491.518	1.00019	97.5204	0.1868
42.8	379.169	1850.08	5.15122	253.185	529.832	78.3018	31.1447	44.9586	491.512	1.00019	97.5512	0.18776
43	379.118	1850	5.14169	253.213	529.704	78.2825	31.0082	45.2331	491.506	1.00019	97.582	0.18871
43.2	379.068	1849.92	5.13215	253.24	529.575	78.2628	30.8716	45.5085	491.5	1.00019	97.6128	0.18966
43.4	379.018	1849.83	5.1226	253.267	529.445	78.2428	30.7349	45.7848	491.495	1.00019	97.6434	0.19062
43.6	378.968	1849.75	5.11304	253.293	529.313	78.2224	30.5983	46.0619	491.49	1.00019	97.674	0.19157
43.8	378.918	1849.67	5.10346	253.32	529.18	78.2016	30.4616	46.3399	491.485	1.00019	97.7045	0.19252
44	378.869	1849.59	5.09387	253.346	529.046	78.1805	30.3248	46.6189	491.48	1.00019	97.7349	0.19348
44.2	378.819	1849.51	5.08426	253.372	528.91	78.159	30.188	46.8987	491.476	1.00019	97.7652	0.19443
44.4	378.769	1849.43	5.07464	253.397	528.773	78.1371	30.051	47.1796	491.472	1.0002	97.7955	0.19538
44.6	378.72	1849.35	5.065	253.422	528.634	78.1148	29.914	47.4614	491.468	1.0002	97.8258	0.19633
44.8	378.67	1849.27	5.05535	253.447	528.494	78.0921	29.777	47.7441	491.465	1.0002	97.8559	0.19729
45	378.621	1849.19	5.04569	253.472	528.352	78.0691	29.6399	48.0277	491.462	1.0002	97.8859	0.19824
45.2	378.572	1849.12	5.03601	253.496	528.21	78.0457	29.5028	48.3121	491.459	1.0002	97.9159	0.19919
45.4	378.522	1849.04	5.02633	253.52	528.065	78.0218	29.3656	48.5974	491.456	1.0002	97.9458	0.20015
45.6	378.473	1848.96	5.01662	253.543	527.919	77.9976	29.2284	48.8836	491.454	1.0002	97.9756	0.2011
45.8	378.424	1848.89	5.0069	253.566	527.772	77.973	29.091	49.1709	491.451	1.0002	98.0054	0.20205
46	378.374	1848.81	4.99716	253.589	527.623	77.9479	28.9536	49.4591	491.449	1.0002	98.035	0.203
46.2	378.325	1848.74	4.9874	253.612	527.472	77.9224	28.8162	49.7483	491.447	1.0002	98.0646	0.20395
46.4	378.275	1848.66	4.97763	253.634	527.32	77.8966	28.6786	50.0383	491.446	1.0002	98.0941	0.20491
46.6	378.226	1848.59	4.96785	253.656	527.167	77.8702	28.5411	50.3293	491.444	1.00021	98.1235	0.20586
46.8	378.177	1848.51	4.95805	253.677	527.011	77.8435	28.4034	50.6211	491.443	1.00021	98.1528	0.20681
47	378.127	1848.44	4.94823	253.698	526.855	77.8163	28.2657	50.914	491.442	1.00021	98.182	0.20776
47.2	378.078	1848.37	4.93839	253.719	526.696	77.7887	28.1279	51.2079	491.441	1.00021	98.2112	0.20871
47.4	378.028	1848.3	4.92853	253.739	526.536	77.7606	27.9899	51.5029	491.44	1.00021	98.2403	0.20967
47.6	377.978	1848.22	4.91864	253.759	526.374	77.732	27.8518	51.7989	491.439	1.00021	98.2692	0.21062
47.8	377.929	1848.15	4.90874	253.779	526.21	77.703	27.7136	52.0959	491.439	1.00021	98.2982	0.21157
48	377.879	1848.08	4.89882	253.798	526.045	77.6736	27.5754	52.3938	491.438	1.00021	98.327	0.21252
48.2	377.829	1848.01	4.88889	253.816	525.878	77.6436	27.4371	52.6927	491.438	1.00021	98.3557	0.21347
48.4	377.779	1847.94	4.87893	253.835	525.709	77.6132	27.2987	52.9926	491.438	1.00021	98.3843	0.21442
48.6	377.729	1847.87	4.86895	253.853	525.538	77.5823	27.1602	53.2936	491.438	1.00022	98.4128	0.21537
48.8	377.678	1847.81	4.85895	253.87	525.366	77.5508	27.0215	53.5958	491.438	1.00022	98.4413	0.21633
49	377.628	1847.74	4.84892	253.887	525.191	77.5189	26.8827	53.8991	491.439	1.00022	98.4697	0.21728
49.2	377.577	1847.67	4.83886	253.904	525.015	77.4864	26.7437	54.2034	491.439	1.00022	98.498	0.21823
49.4	377.526	1847.6	4.82878	253.92	524.837	77.4534	26.6047	54.5088	491.439	1.00022	98.5261	0.21918
49.6	377.475	1847.54	4.81868	253.935	524.656	77.4199	26.4655	54.8153	491.44	1.00022	98.5542	0.22013
49.8	377.424	1847.47	4.80856	253.95	524.474	77.3858	26.3262	55.1229	491.441	1.00022	98.5822	0.22108
50	377.373	1847.41	4.79841	253.965	524.29	77.3512	26.1867	55.4317	491.442	1.00022	98.6101	0.22203
50.2	377.321	1847.34	4.78822	253.979	524.103	77.316	26.0469	55.7419	491.442	1.00022	98.6379	0.22298
50.4	377.269	1847.28	4.77799	253.993	523.914	77.2802	25.9069	56.0535	491.443	1.00022	98.6657	0.22393
50.6	377.217	1847.21	4.76773	254.006	523.723	77.2437	25.7667	56.3665	491.444	1.00022	98.6933	0.22488
50.8	377.165	1847.15	4.75744	254.019	523.529	77.2067	25.6262	56.6808	491.446	1.00023	98.7209	0.22583
51	377.112	1847.08	4.74711	254.031	523.333	77.169	25.4854	56.9965	491.447	1.00023	98.7484	0.22678
51.2	377.059	1847.02	4.73674	254.042	523.135	77.1307	25.3443	57.3139	491.448	1.00023	98.7758	0.22773
51.4	377.006	1846.96	4.72631	254.053	522.934	77.0916	25.2028	57.633	491.449	1.00023	98.8031	0.22868
51.6	376.952	1846.89	4.71582	254.064	522.73	77.0518	25.0607	57.9543	491.451	1.00023	98.8304	0.22963
51.8	376.897	1846.83	4.70528	254.074	522.522	77.0112	24.918	58.2778	491.452	1.00023	98.8577	0.23058
52	376.843	1846.77	4.69467	254.083	522.312	76.9698	24.7748	58.6033	491.454	1.00023	98.8849	0.23152
52.2	376.787	1846.71	4.684	254.091	522.099	76.9276	24.631	58.931	491.456	1.00023	98.9121	0.23247
52.4	376.732	1846.65	4.67326	254.1	521.882	76.8846	24.4865	59.261	491.457	1.00023	98.9392	0.23342
52.6	376.675	1846.58	4.66243	254.107	521.662	76.8406	24.3412	59.5938	491.459	1.00023	98.9663	0.23437
52.8	376.619	1846.52	4.65152	254.114	521.438	76.7957	24.1951	59.9295	491.461	1.00024	98.9934	0.23532
53	376.561	1846.46	4.6405	254.12	521.209	76.7497	24.0478	60.2686	491.463	1.00024	99.0205	0.23626
53.2	376.503	1846.4	4.62937	254.125	520.976	76.7026	23.8994	60.6112	491.465	1.00024	99.0477	0.23721
53.4	376.443	1846.33	4.61813	254.129	520.739	76.6544	23.7498	60.9575	491.467	1.00024	99.0748	0.23816
53.6	376.383	1846.27	4.60676	254.133	520.497	76.605	23.5989	61.3079	491.469	1.00024	99.1021	0.2391
53.8	376.322	1846.21	4.59525	254.136	520.249	76.5543	23.4465	61.6626	491.471	1.00024	99.1294	0.24005
54	376.26	1846.14	4.58359	254.138	519.996	76.5022	23.2925	62.0219	491.474	1.00024	99.1567	0.24099
54.2	376.197	1846.08	4.57176	254.139	519.737	76.4486	23.1366	62.3867	491.476	1.00024	99.1842	0.24194
54.4	376.133	1846.02	4.55973	254.14	519.47	76.3933	22.9784	62.7577	491.478	1.00024	99.2118	0.24288
54.6	376.067	1845.95	4.54747	254.139	519.196	76.3363	22.8177	63.1356	491.481	1.00024	99.2397	0.24383
54.8	376	1845.88	4.53498	254.137	518.914	76.2773	22.6544	63.5207	491.484	1.00024	99.2677	0.24477
55	375.931	1845.82	4.52224	254.134	518.624	76.2163	22.4883	63.9132	491.487	1.00025	99.296	0.24571
55.2	375.861	1845.75	4.50925	254.13	518.324	76.1531	22.3194	64.3137	491.49	1.00025	99.3245	0.24665
55.4	375.788	1845.68	4.49599	254.124	518.016	76.0878	22.1475	64.7221	491.493	1.00025	99.3531	0.24759
55.6	375.715	1845.61	4.48246	254.117	517.698	76.0202	21.9726	65.1387	491.496	1.00025	99.382	0.24853
55.8	375.639	1845.53	4.46864	254.109	517.37	75.9501	21.7946	65.5639	491.5	1.00025	99.4111	0.24947
56	375.561	1845.46	4.45454	254.099	517.031	75.8775	21.6136	65.9975	491.504	1.00025	99.4403	0.25041
56.2	375.482	1845.38	4.44017	254.087	516.683	75.8025	21.4296	66.4391	491.508	1.00025	99.4696	0.25135
56.4	375.401	1845.31	4.42555	254.074	516.324	75.725	21.2431	66.8879	491.512	1.00025	99.499	0.25229
56.6	375.318	1845.23	4.4107	254.059	515.957	75.6452	21.0545	67.3431	491.517	1.00025	99.5283	0.25322
56.8	375.234	1845.15	4.39566	254.042	515.58	75.563	20.864	67.8039	491.522	1.00025	99.5575	0.25416
57	375.148	1845.07	4.38045	254.023	515.194	75.4788	20.6721	68.2689	491.527	1.00026	99.5865	0.25509
57.2	375.062	1844.99	4.3651	254.001	514.801	75.3924	20.4793	68.7377	491.532	1.00026	99.6152	0.25603
57.4	374.974	1844.9	4.34962	253.978	514.4	75.3039	20.2855	69.2096	491.538	1.00026	99.6435	0.25696
57.6	374.886	1844.82	4.33404	253.953	513.991	75.2135	20.0914	69.6834	491.544	1.00026	99.6714	0.25789
57.8	374.796	1844.74	4.31838	253.925	513.575	75.1212	19.8972	70.1587	491.55	1.00026	99.6988	0.25882
58	374.706	1844.65	4.30263	253.895	513.152	75.0268	19.7026	70.6357	491.557	1.00026	99.7257	0.25976
58.2	374.615	1844.56	4.28676	253.862	512.72	74.9302	19.5075	71.1149	491.565	1.00026	99.7521	0.26069
58.4	374.522	1844.47	4.27073	253.827	512.278	74.8309	19.3115	71.5975	491.572	1.00026	99.778	0.26162
58.6	374.428	1844.38	4.25448	253.788	511.825	74.7286	19.1137	72.0852	491.581	1.00026	99.8035	0.26254
58.8	374.331	1844.29	4.23795	253.746	511.356	74.6227	18.9136	72.5796	491.59	1.00026	99.8286	0.26347
59	374.232	1844.19	4.22106	253.7	510.872	74.5125	18.7104	73.0825	491.6	1.00026	99.8533	0.2644
59.2	374.13	1844.09	4.20374	253.649	510.367	74.3976	18.5033	73.5959	491.611	1.00027	99.8777	0.26532
59.4	374.024	1843.98	4.18592	253.593	509.84	74.277	18.2915	74.1217	491.623	1.00027	99.9017	0.26624
59.6	373.914	1843.87	4.16749	253.532	509.286	74.1499	18.074	74.6622	491.637	1.00027	99.9253	0.26716
59.8	373.799	1843.75	4.14833	253.463	508.701	74.0151	17.8496	75.2207	491.652	1.00027	99.9486	0.26808
60	373.678	1843.62	4.12831	253.387	508.08	73.8713	17.6168	75.8006	491.668	1.00027	99.9715	0.26899
60.2	373.551	1843.48	4.10727	253.301	507.414	73.717	17.3742	76.4052	491.687	1.00027	99.994	0.2699
60.4	373.415	1843.33	4.08503	253.203	506.698	73.5502	17.1201	77.0386	491.709	1.00027	100.016	0.27081
60.6	373.269	1843.16	4.06135	253.092	505.92	73.3685	16.8522	77.7065	491.734	1.00027	100.037	0.27171
60.8	373.111	1842.97	4.03599	252.965	505.069	73.169	16.5682	78.4143	491.763	1.00027	100.057	0.2726
61	372.939	1842.77	4.00858	252.817	504.129	72.9479	16.2649	79.1696	491.797	1.00027	100.076	0.27348
61.2	372.749	1842.53	3.97853	252.642	503.074	72.6989	15.9365	79.9858	491.837	1.00027	100.093	0.27435
61.4	372.535	1842.25	3.94507	252.433	501.869	72.4137	15.576	80.88	491.886	1.00028	100.108	0.27521
61.6	372.291	1841.92	3.90729	252.177	500.472	72.082	15.1753	81.8705	491.947	1.00028	100.12	0.27604
61.8	372.009	1841.52	3.86411	251.861	498.828	71.6905	14.7252	82.9781	492.023	1.00028	100.126	0.27686
62	371.679	1841.04	3.81441	251.467	496.876	71.2244	14.2173	84.2207	492.118	1.00028	100.125	0.27764
62.2	371.299	1840.45	3.75772	250.977	494.575	70.6734	13.6507	85.5957	492.238	1.00028	100.112	0.27838
62.4	370.865	1839.74	3.69401	250.378	491.896	70.0305	13.0293	87.0876	492.387	1.00028	100.085	0.27908
62.6	370.374	1838.9	3.62296	249.648	488.795	69.2848	12.3553	88.6834	492.569	1.00028	100.037	0.27973
62.8	369.824	1837.89	3.5448	248.771	485.246	68.4303	11.6362	90.3536	492.791	1.00028	99.9645	0.28033
63	369.216	1836.71	3.46001	247.728	481.232	67.4633	10.8826	92.0596	493.056	1.00028	99.861	0.28087
63.2	368.547	1835.33	3.36875	246.495	476.716	66.3764	10.1019	93.7657	493.372	1.00028	99.7199	0.28134
63.4	367.818	1833.73	3.27166	245.05	471.679	65.167	9.30657	95.4193	493.745	1.00028	99.5342	0.28173
63.6	367.02	1831.86	3.16805	243.347	466.029	63.8156	8.49821	96.985	494.187	1.00028	99.2931	0.28202
63.8	366.138	1829.68	3.05597	241.313	459.581	62.2793	7.6705	98.4332	494.71	1.00028	98.9791	0.28217
64	365.22	1827.29	2.94216	239.082	452.745	60.6547	6.86795	99.6818	495.284	1.00028	98.6126	0.28217
64.086	364.824	1826.18	2.89574	238.112	449.885	59.9867	6.55076	100.13	495.548	1.00028	98.4531	0.28217
64.172	364.399	1824.92	2.84658	236.995	446.698	59.243	6.23516	100.488	495.848	1.00028	98.2582	0.28217
64.258	363.943	1823.55	2.79126	235.682	442.984	58.3663	5.90019	100.821	496.185	1.00028	98.0187	0.28217
64.345	363.468	1822.12	2.73219	234.261	438.975	57.418	5.5497	101.154	496.544	1.00028	97.7564	0.28217
64.431	362.985	1820.64	2.67266	232.799	434.893	56.4563	5.20109	101.454	496.915	1.00028	97.4851	0.28217
64.518	362.508	1819.15	2.6149	231.339	430.868	55.5125	4.86995	101.693	497.288	1.00028	97.2114	0.28217
64.605	362.044	1817.66	2.55956	229.894	426.938	54.5937	4.56166	101.865	497.66	1.00028	96.937	0.28217
64.692	361.595	1816.19	2.50652	228.463	423.093	53.697	4.27555	101.974	498.029	1.00028	96.6612	0.28217
64.78	361.162	1814.73	2.45542	227.038	419.313	52.8175	4.00901	102.024	498.396	1.00028	96.3831	0.28217
64.867	360.74	1813.27	2.40595	225.615	415.581	51.9514	3.75961	102.02	498.763	1.00028	96.1019	0.28217
64.955	360.328	1811.81	2.35785	224.189	411.882	51.0955	3.52524	101.964	499.131	1.00028	95.8167	0.28217
65.043	359.923	1810.34	2.31082	222.752	408.195	50.2456	3.30376	101.86	499.503	1.00028	95.5264	0.28217
65.131	359.521	1808.84	2.26449	221.293	404.495	49.3964	3.09312	101.706	499.882	1.00028	95.2291	0.28217
65.22	359.119	1807.31	2.21852	219.801	400.753	48.5416	2.89136	101.502	500.271	1.00028	94.9224	0.28217
65.308	358.713	1805.72	2.17256	218.262	396.941	47.6754	2.69699	101.246	500.674	1.00028	94.6038	0.28217
65.397	358.3	1804.07	2.1264	216.668	393.038	46.7936	2.50918	100.933	501.094	1.00028	94.2713	0.28217
65.486	357.88	1802.33	2.0799	215.011	389.028	45.8933	2.32749	100.56	501.535	1.00028	93.923	0.28217
65.575	357.45	1800.5	2.03294	213.282	384.895	44.972	2.1517	100.123	501.998	1.00028	93.5573	0.28217
65.664	357.009	1798.57	1.9854	211.473	380.623	44.0271	1.98168	99.6173	502.487	1.00028	93.1722	0.28217
65.754	356.554	1796.52	1.93713	209.572	376.191	43.055	1.81719	99.0357	503.006	1.00028	92.765	0.28217
65.843	356.082	1794.32	1.88792	207.564	371.572	42.0509	1.65797	98.3704	503.56	1.00028	92.3324	0.28217
65.933	355.592	1791.96	1.83765	205.438	366.743	41.0116	1.50413	97.6133	504.153	1.00028	91.8715	0.28217
66.023	355.083	1789.42	1.78636	203.187	361.698	39.9374	1.3563	96.7587	504.787	1.00028	91.3808	0.28217
66.114	354.557	1786.7	1.73424	200.812	356.445	38.8313	1.21534	95.803	505.464	1.00028	90.8597	0.28217
66.204	354.015	1783.8	1.68155	198.317	351	37.6989	1.08226	94.7459	506.184	1.00028	90.309	0.28217
66.295	353.459	1780.72	1.62867	195.714	345.392	36.5478	0.957999	93.5903	506.943	1.00028	89.7307	0.28217
66.386	352.893	1777.46	1.57585	193.009	339.643	35.3842	0.843108	92.3396	507.742	1.00028	89.1264	0.28217
66.477	352.315	1773.99	1.52318	190.203	333.756	34.2109	0.737554	90.9935	508.582	1.00028	88.4955	0.28217
66.568	351.724	1770.29	1.47064	187.287	327.722	33.0279	0.641067	89.5496	509.468	1.00028	87.8362	0.28217
66.66	351.117	1766.34	1.41824	184.256	321.533	31.8367	0.55341	88.0063	510.402	1.00028	87.147	0.28217
66.751	350.495	1762.09	1.36601	181.102	315.185	30.6389	0.474327	86.362	511.39	1.00028	86.4261	0.28217
66.843	349.851	1757.48	1.31381	177.81	308.652	29.4331	0.403367	84.6103	512.438	1.00028	85.6695	0.28217
66.936	349.181	1752.45	1.26146	174.354	301.895	28.2165	0.340032	82.7411	513.558	1.00028	84.871	0.28217
67.028	348.481	1746.96	1.20892	170.719	294.893	26.9894	0.284022	80.7483	514.754	1.00028	84.026	0.28217
67.12	347.75	1740.94	1.15624	166.893	287.633	25.7549	0.235062	78.6291	516.029	1.00028	83.1305	0.28217
67.213	346.986	1734.39	1.10343	162.862	280.096	24.5147	0.192753	76.3793	517.384	1.00028	82.1792	0.28217
67.306	346.19	1727.3	1.05055	158.617	272.27	23.2717	0.156634	73.9971	518.814	1.00028	81.167	0.28217
67.399	345.366	1719.74	0.99777	154.165	264.163	22.0306	0.126193	71.4875	520.307	1.00028	80.0913	0.28217
67.493	344.525	1711.85	0.94558	149.547	255.842	20.8034	0.100948	68.8751	521.833	1.00028	78.9578	0.28217
67.586	343.688	1703.85	0.89485	144.855	247.455	19.6102	0.080407	66.2103	523.354	1.00028	77.7844	0.28217
67.68	342.874	1695.96	0.84645	140.194	239.174	18.4718	0.063974	63.5541	524.828	1.00028	76.5958	0.28217
67.774	342.101	1688.39	0.80119	135.674	231.179	17.4072	0.051015	60.9702	526.219	1.00028	75.42	0.28217
67.868	341.379	1681.25	0.75953	131.374	223.601	16.4281	0.040885	58.5074	527.508	1.00028	74.2804	0.28217
67.963	340.705	1674.51	0.72127	127.304	216.453	15.5306	0.032935	56.175	528.699	1.00028	73.1833	0.28217
68.057	340.072	1668.13	0.68594	123.438	209.684	14.704	0.026629	53.9608	529.804	1.00028	72.125	0.28217
68.152	339.475	1662.05	0.65314	119.754	203.254	13.9392	0.021583	51.854	530.834	1.00028	71.102	0.28217
68.247	338.909	1656.24	0.62264	116.243	197.14	13.2305	0.017522	49.8494	531.793	1.00028	70.1136	0.28217
68.342	338.374	1650.68	0.59426	112.899	191.334	12.5739	0.014245	47.9457	532.688	1.00028	69.1607	0.28217
68.438	337.865	1645.34	0.56784	109.715	185.821	11.9653	0.011594	46.1393	533.523	1.00028	68.2431	0.28217
68.533	337.379	1640.18	0.54313	106.671	180.567	11.3993	0.009439	44.4205	534.305	1.00028	67.357	0.28217
68.629	336.911	1635.12	0.51984	103.74	175.525	10.8692	0.007677	42.7747	535.043	1.00028	66.4961	0.28217
68.726	336.451	1630.09	0.49764	100.884	170.63	10.3673	0.006222	41.1814	535.747	1.00028	65.6502	0.28217
68.822	335.992	1624.97	0.47611	98.0526	165.798	9.88462	0.005008	39.6148	536.431	1.00028	64.8057	0.28217
68.919	335.525	1619.67	0.45492	95.2014	160.955	9.41378	0.00399	38.0516	537.102	1.00028	63.9494	0.28217
69.017	335.045	1614.13	0.43393	92.3079	156.064	8.95151	0.003137	36.4811	537.763	1.00028	63.0742	0.28217
69.115	334.552	1608.3	0.41312	89.3675	151.118	8.49774	0.002433	34.9029	538.408	1.00028	62.1784	0.28217
69.214	334.044	1602.17	0.39251	86.3804	146.118	8.05306	0.001859	33.3188	539.033	1.00028	61.2614	0.28217
69.314	333.52	1595.7	0.37212	83.3446	141.063	7.61772	0.001398	31.7298	539.628	1.00028	60.3217	0.28217
69.414	332.979	1588.88	0.35196	80.2577	135.949	7.19182	0.001035	30.1366	540.182	1.00028	59.3576	0.28217
69.514	332.422	1581.71	0.33209	77.1261	130.785	6.77641	0.000755	28.5443	540.682	1.00028	58.3695	0.28217
69.616	331.853	1574.23	0.31262	73.9663	125.597	6.37344	0.000542	26.962	541.111	1.00028	57.3608	0.28217
69.717	331.277	1566.55	0.2937	70.8051	120.425	5.98546	0.000384	25.4031	541.452	1.00028	56.3379	0.28217
69.82	330.705	1558.81	0.27558	67.688	115.337	5.61654	0.00027	23.8886	541.69	1.00028	55.3136	0.28217
69.922	330.145	1551.13	0.25846	64.6616	110.406	5.27049	0.000189	22.4397	541.817	1.00028	54.3028	0.28217
70.026	329.601	1543.57	0.24239	61.7406	105.655	4.94744	0.000132	21.0624	541.833	1.00028	53.311	0.28217
70.13	329.068	1536.09	0.22724	58.9144	101.064	4.64486	9.2e-05	19.751	541.734	1.00028	52.3357	0.28217
70.234	328.547	1528.66	0.21293	56.1738	96.6194	4.36061	6.3e-05	18.5004	541.519	1.00028	51.3743	0.28217
70.339	328.035	1521.28	0.19941	53.5175	92.3165	4.09345	4.4e-05	17.3088	541.185	1.00028	50.4266	0.28217
70.444	327.533	1513.95	0.18665	50.946	88.1552	3.84242	3e-05	16.1756	540.73	1.00028	49.4934	0.28217
70.55	327.04	1506.66	0.1746	48.4574	84.1311	3.6064	2e-05	15.0988	540.149	1.00028	48.5741	0.28217
70.657	326.557	1499.41	0.16322	46.0519	80.2441	3.38457	1.4e-05	14.0774	539.44	1.00028	47.6694	0.28217
70.764	326.081	1492.17	0.15249	43.7275	76.4902	3.17602	9e-06	13.1097	538.596	1.00028	46.7788	0.28217
70.871	325.61	1484.91	0.14233	41.4727	72.8506	2.97913	6e-06	12.1902	537.607	1.00028	45.8982	0.28217
70.979	325.142	1477.59	0.13267	39.279	69.3106	2.79257	4e-06	11.3146	536.459	1.00028	45.0241	0.28217
71.087	324.676	1470.2	0.1235	37.1479	65.8714	2.61591	3e-06	10.4826	535.145	1.00028	44.1565	0.28217
71.196	324.215	1462.78	0.11482	35.0836	62.5381	2.44891	2e-06	9.69463	533.657	1.00028	43.2965	0.28217
71.305	323.759	1455.33	0.10661	33.0895	59.3149	2.29128	1e-06	8.95075	531.994	1.00028	42.4449	0.28217
71.415	323.308	1447.87	0.09889	31.1706	56.2086	2.14286	1e-06	8.25136	530.153	1.00028	41.6035	0.28217
71.525	322.865	1440.43	0.09163	29.3303	53.2239	2.00341	0	7.59633	528.136	1.00028	40.7734	0.28217
71.635	322.428	1432.99	0.08483	27.568	50.3591	1.87243	0	6.98397	525.938	1.00028	39.9545	0.28217
71.746	321.996	1425.54	0.07844	25.8795	47.6069	1.74922	0	6.41155	523.552	1.00028	39.1446	0.28217
71.857	321.569	1418.07	0.07244	24.2617	44.9619	1.63318	0	5.8767	520.973	1.00028	38.3419	0.28217
71.969	321.148	1410.59	0.06681	22.7154	42.4243	1.52399	0	5.37825	518.203	1.00028	37.5463	0.28217
72.081	320.732	1403.12	0.06154	21.2415	39.9952	1.42138	0	4.91509	515.25	1.00028	36.758	0.28217
72.193	320.323	1395.68	0.05662	19.8402	37.6743	1.32505	0	4.4858	512.125	1.00028	35.9768	0.28217
72.306	319.922	1388.3	0.05204	18.5127	35.4637	1.23481	0	4.08934	508.847	1.00028	35.2036	0.28217
72.419	319.53	1381	0.0478	17.26	33.3651	1.15046	0	3.72454	505.436	1.00028	34.4396	0.28217
72.532	319.147	1373.82	0.04387	16.0809	31.3768	1.07172	0	3.3897	501.914	1.00028	33.6851	0.28217
72.646	318.774	1366.75	0.04023	14.973	29.4956	0.99824	0	3.08286	498.299	1.00028	32.9398	0.28217
72.76	318.412	1359.81	0.03687	13.934	27.7184	0.92972	0	2.80215	494.612	1.00028	32.2038	0.28217
72.875	318.059	1353	0.03378	12.9614	26.0418	0.86588	0	2.54576	490.874	1.00028	31.4774	0.28217
72.989	317.717	1346.36	0.03093	12.0528	24.4629	0.80644	0	2.31201	487.105	1.00028	30.7609	0.28217
73.104	317.385	1339.87	0.02831	11.2054	22.9778	0.75114	0	2.09919	483.326	1.00028	30.0548	0.28217
73.22	317.065	1333.54	0.02591	10.4161	21.5827	0.69973	0	1.90566	479.554	1.00028	29.3592	0.28217
73.335	316.754	1327.38	0.02371	9.682	20.2737	0.65196	0	1.7299	475.806	1.00028	28.6749	0.28217
73.451	316.454	1321.39	0.02169	8.99934	19.0454	0.60757	0	1.5703	472.09	1.00028	28.0013	0.28217
73.567	316.163	1315.54	0.01984	8.36376	17.8914	0.56624	0	1.42519	468.411	1.00028	27.3373	0.28217
73.683	315.881	1309.83	0.01813	7.77154	16.8061	0.5277	0	1.29314	464.774	1.00028	26.682	0.28217
73.8	315.607	1304.26	0.01657	7.21968	15.785	0.49176	0	1.17296	461.187	1.00028	26.0352	0.28217
73.917	315.341	1298.83	0.01514	6.70559	14.8245	0.45823	0	1.06361	457.657	1.00028	25.3967	0.28217
74.034	315.083	1293.54	0.01382	6.2273	13.9219	0.42697	0	0.96421	454.197	1.00028	24.7674	0.28217
74.151	314.834	1288.4	0.01262	5.78323	13.0754	0.39787	0	0.87404	450.818	1.00028	24.1485	0.28217
74.269	314.593	1283.42	0.01152	5.37182	12.2832	0.37084	0	0.7924	447.533	1.00028	23.5413	0.28217
74.386	314.361	1278.59	0.01052	4.99097	11.5423	0.34574	0	0.71855	444.344	1.00028	22.9467	0.28217
74.504	314.136	1273.9	0.0096	4.63782	10.8482	0.3224	0	0.65163	441.249	1.00028	22.3635	0.28217
74.622	313.918	1269.34	0.00876	4.30957	10.1964	0.30064	0	0.59086	438.239	1.00028	21.7904	0.28217
74.74	313.706	1264.88	0.008	4.00404	9.58338	0.28033	0	0.5356	435.313	1.00028	21.2267	0.28217
74.859	313.5	1260.53	0.00729	3.71942	9.00629	0.26134	0	0.48531	432.468	1.00028	20.6719	0.28217
74.977	313.299	1256.28	0.00665	3.45417	8.46275	0.24358	0	0.43954	429.703	1.00028	20.1258	0.28217
75.096	313.103	1252.12	0.00606	3.20722	7.95122	0.22698	0	0.39792	427.022	1.00028	19.5889	0.28217
75.214	312.913	1248.07	0.00551	2.97755	7.47029	0.21149	0	0.36011	424.427	1.00028	19.0619	0.28217
75.333	312.727	1244.11	0.00502	2.76385	7.01791	0.19703	0	0.32578	421.917	1.00028	18.5444	0.28217
75.452	312.546	1240.24	0.00457	2.56479	6.59182	0.1835	0	0.29455	419.487	1.00028	18.0359	0.28217
75.571	312.37	1236.45	0.00415	2.37925	6.19023	0.17084	0	0.26615	417.134	1.00028	17.5361	0.28217
75.69	312.197	1232.73	0.00377	2.20627	5.81155	0.15899	0	0.24032	414.858	1.00028	17.0447	0.28217
75.809	312.027	1229.08	0.00342	2.04498	5.45438	0.1479	0	0.21682	412.657	1.00028	16.5615	0.28217
75.928	311.862	1225.51	0.00311	1.89462	5.11755	0.13752	0	0.19547	410.53	1.00028	16.0868	0.28217
76.047	311.699	1222.01	0.00281	1.75448	4.7999	0.12781	0	0.17606	408.476	1.00028	15.6204	0.28217
76.166	311.54	1218.57	0.00255	1.62386	4.50028	0.11871	0	0.15844	406.494	1.00028	15.1623	0.28217
76.285	311.384	1215.19	0.00231	1.50215	4.21771	0.1102	0	0.14244	404.583	1.00028	14.7125	0.28217
76.404	311.232	1211.89	0.00208	1.38886	3.95145	0.10225	0	0.12793	402.744	1.00028	14.2714	0.28217
76.523	311.082	1208.65	0.00188	1.2835	3.70076	0.09482	0	0.11479	400.977	1.00028	13.8393	0.28217
76.642	310.936	1205.49	0.0017	1.1856	3.46487	0.08788	0	0.10291	399.282	1.00028	13.4164	0.28217
76.761	310.792	1202.39	0.00153	1.09471	3.2431	0.08142	0	0.09217	397.657	1.00028	13.0031	0.28217
76.879	310.652	1199.36	0.00138	1.01039	3.03475	0.07539	0	0.08248	396.101	1.00028	12.5997	0.28217
76.998	310.515	1196.39	0.00124	0.93214	2.83891	0.06977	0	0.07373	394.612	1.00028	12.2057	0.28217
77.117	310.38	1193.48	0.00112	0.85943	2.65461	0.06453	0	0.06583	393.184	1.00028	11.8207	0.28217
77.235	310.247	1190.61	0.001	0.7918	2.48096	0.05964	0	0.0587	391.813	1.00028	11.4441	0.28217
77.354	310.116	1187.78	0.0009	0.72879	2.31703	0.05507	0	0.05224	390.494	1.00028	11.075	0.28217
77.473	309.986	1184.96	0.0008	0.6699	2.16181	0.05078	0	0.0464	389.22	1.00028	10.7121	0.28217
77.591	309.856	1182.16	0.00072	0.6148	2.01459	0.04675	0	0.0411	387.989	1.00028	10.3547	0.28217
77.71	309.727	1179.36	0.00064	0.56324	1.87492	0.04297	0	0.0363	386.797	1.00028	10.0024	0.28217
77.828	309.597	1176.56	0.00057	0.51496	1.74225	0.03941	0	0.03196	385.642	1.00028	9.65453	0.28217
77.946	309.467	1173.75	0.0005	0.46977	1.61619	0.03608	0	0.02804	384.525	1.00028	9.3106	0.28217
78.065	309.337	1170.97	0.00044	0.42771	1.49696	0.03295	0	0.02452	383.451	1.00028	8.97184	0.28217
78.183	309.209	1168.25	0.00039	0.38896	1.38529	0.03006	0	0.02139	382.434	1.00028	8.64117	0.28217
78.301	309.086	1165.67	0.00034	0.3538	1.28214	0.02742	0	0.01865	381.49	1.00028	8.32281	0.28217
78.419	308.972	1163.3	0.0003	0.3226	1.1889	0.02505	0	0.0163	380.642	1.00028	8.02302	0.28217
78.537	308.873	1161.31	0.00027	0.29655	1.10948	0.02304	0	0.01438	379.934	1.00028	7.7575	0.28217
78.656	308.79	1159.63	0.00025	0.27552	1.04451	0.02141	0	0.01287	379.351	1.00028	7.53351	0.28217
78.774	308.692	1157.62	0.00022	0.2527	0.9736	0.01966	0	0.0113	378.685	1.00028	7.283	0.28217

## Sheet: Scenarios
Depth	Diagnostic 1	Diagnostic 2	Diagnostic 3	Diagnostic 4
0	0	0.99999	0	0
0.2	-3e-05	0.99909	2e-05	4.87498
0.4	-7e-05	0.99818	3e-05	10.1648
0.6	-0.00011	0.99725	5e-05	15.4388
0.8	-0.00015	0.99629	7e-05	20.6876
1	-0.00019	0.99532	9e-05	25.911
1.2	-0.00023	0.99433	0.00011	31.1089
1.4	-0.00027	0.99331	0.00013	36.2815
1.6	-0.00032	0.99228	0.00015	41.4285
1.8	-0.00036	0.99122	0.00017	46.5504
2	-0.00041	0.99015	0.0002	51.6465
2.2	-0.00046	0.98906	0.00022	56.7178
2.4	-0.00052	0.98794	0.00024	61.7627
2.6	-0.00057	0.98681	0.00027	66.7838
2.8	-0.00063	0.98566	0.0003	71.777
3	-0.00069	0.98449	0.00033	76.7487
3.2	-0.00075	0.9833	0.00035	81.689
3.4	-0.00081	0.98209	0.00038	86.613
3.6	-0.00088	0.98087	0.00042	91.4983
3.8	-0.00094	0.97962	0.00045	96.3775
4	-0.00101	0.97836	0.00048	101.204
4.2	-0.00108	0.97708	0.00052	106.043
4.4	-0.00115	0.97578	0.00055	110.804
4.6	-0.00123	0.97447	0.00059	115.612
4.8	-0.0013	0.97314	0.00063	120.299
5	-0.00138	0.97179	0.00067	125.085
5.2	-0.00146	0.97042	0.00072	129.687
5.4	-0.00155	0.96904	0.00076	134.461
5.6	-0.00163	0.96765	0.00081	138.968
5.8	-0.00172	0.96624	0.00085	143.74
6	-0.00181	0.96481	0.0009	148.147
6.2	-0.0019	0.96337	0.00095	152.916
6.4	-0.00199	0.96191	0.00101	157.229
6.6	-0.00208	0.96044	0.00106	161.985
6.8	-0.00218	0.95896	0.00112	166.221
7	-0.00228	0.95746	0.00118	170.94
7.2	-0.00238	0.95595	0.00124	175.125
7.4	-0.00248	0.95443	0.0013	179.781
7.6	-0.00259	0.95289	0.00137	183.941
7.8	-0.00269	0.95134	0.00144	188.512
8	-0.0028	0.94978	0.00151	192.66
8.2	-0.00291	0.9482	0.00158	197.145
8.4	-0.00302	0.94661	0.00166	201.273
8.6	-0.00313	0.94501	0.00174	205.69
8.8	-0.00325	0.94339	0.00182	209.771
9	-0.00337	0.94176	0.0019	214.15
9.2	-0.00348	0.94013	0.00199	218.156
9.4	-0.0036	0.93848	0.00208	222.518
9.6	-0.00373	0.93682	0.00217	226.442
9.8	-0.00385	0.93515	0.00227	230.783
10	-0.00397	0.93346	0.00237	234.64
10.2	-0.0041	0.93177	0.00247	238.934
10.4	-0.00423	0.93007	0.00258	242.755
10.6	-0.00436	0.92835	0.00269	246.976
10.8	-0.00449	0.92662	0.0028	250.779
11	-0.00463	0.92489	0.00292	254.923
11.2	-0.00476	0.92314	0.00304	258.698
11.4	-0.0049	0.92138	0.00316	262.787
11.6	-0.00504	0.91962	0.00329	266.508
11.8	-0.00518	0.91784	0.00342	270.568
12	-0.00532	0.91606	0.00355	274.216
12.2	-0.00546	0.91426	0.00369	278.257
12.4	-0.0056	0.91246	0.00384	281.838
12.6	-0.00575	0.91065	0.00399	285.841
12.8	-0.0059	0.90882	0.00414	289.384
13	-0.00604	0.90699	0.0043	293.324
13.2	-0.00619	0.90515	0.00446	296.846
13.4	-0.00635	0.9033	0.00462	300.719
13.6	-0.0065	0.90145	0.00479	304.216
13.8	-0.00665	0.89958	0.00497	308.041
14	-0.00681	0.89771	0.00515	311.489
14.2	-0.00697	0.89583	0.00533	315.291
14.4	-0.00712	0.89395	0.00552	318.676
14.6	-0.00728	0.89205	0.00572	322.46
14.8	-0.00744	0.89015	0.00592	325.795
15	-0.0076	0.88825	0.00612	329.545
15.2	-0.00777	0.88634	0.00633	332.854
15.4	-0.00793	0.88443	0.00655	336.553
15.6	-0.0081	0.88251	0.00677	339.85
15.8	-0.00826	0.88059	0.007	343.5
16	-0.00843	0.87866	0.00723	346.778
16.2	-0.0086	0.87673	0.00747	350.404
16.4	-0.00876	0.8748	0.00771	353.645
16.6	-0.00893	0.87287	0.00796	357.262
16.8	-0.0091	0.87093	0.00822	360.459
17	-0.00927	0.86899	0.00848	364.065
17.2	-0.00945	0.86705	0.00875	367.231
17.4	-0.00962	0.86511	0.00902	370.807
17.6	-0.00979	0.86317	0.0093	373.961
17.8	-0.00997	0.86122	0.00958	377.495
18	-0.01014	0.85927	0.00987	380.64
18.2	-0.01032	0.85732	0.01017	384.138
18.4	-0.01049	0.85536	0.01048	387.259
18.6	-0.01067	0.8534	0.01078	390.741
18.8	-0.01085	0.85144	0.0111	393.822
19	-0.01103	0.84948	0.01142	397.295
19.2	-0.01121	0.84752	0.01175	400.339
19.4	-0.01139	0.84555	0.01208	403.792
19.6	-0.01157	0.84359	0.01243	406.815
19.8	-0.01175	0.84162	0.01277	410.233
20	-0.01193	0.83965	0.01313	413.245
20.2	-0.01212	0.83768	0.01349	416.625
20.4	-0.0123	0.83571	0.01385	419.621
20.6	-0.01248	0.83373	0.01422	422.976
20.8	-0.01267	0.83175	0.0146	425.942
21	-0.01285	0.82977	0.01498	429.283
21.2	-0.01304	0.82779	0.01537	432.212
21.4	-0.01323	0.82581	0.01577	435.539
21.6	-0.01342	0.82383	0.01617	438.439
21.8	-0.0136	0.82184	0.01658	441.74
22	-0.01379	0.81986	0.01699	444.623
22.2	-0.01398	0.81787	0.01741	447.889
22.4	-0.01417	0.81588	0.01784	450.759
22.6	-0.01437	0.81389	0.01827	453.994
22.8	-0.01456	0.8119	0.01871	456.843
23	-0.01475	0.80991	0.01915	460.057
23.2	-0.01494	0.80792	0.0196	462.874
23.4	-0.01514	0.80592	0.02006	466.075
23.6	-0.01533	0.80393	0.02052	468.859
23.8	-0.01553	0.80193	0.02098	472.041
24	-0.01572	0.79994	0.02145	474.801
24.2	-0.01592	0.79794	0.02193	477.955
24.4	-0.01611	0.79594	0.02241	480.7
24.6	-0.01631	0.79395	0.0229	483.822
24.8	-0.01651	0.79195	0.02339	486.551
25	-0.01671	0.78995	0.02389	489.646
25.2	-0.01691	0.78795	0.02439	492.351
25.4	-0.01711	0.78595	0.02489	495.428
25.6	-0.01731	0.78395	0.02541	498.101
25.8	-0.01751	0.78195	0.02592	501.163
26	-0.01771	0.77994	0.02644	503.808
26.2	-0.01791	0.77794	0.02697	506.849
26.4	-0.01811	0.77594	0.0275	509.472
26.6	-0.01832	0.77394	0.02803	512.485
26.8	-0.01852	0.77193	0.02857	515.093
27	-0.01872	0.76993	0.02911	518.077
27.2	-0.01893	0.76793	0.02966	520.667
27.4	-0.01913	0.76592	0.03021	523.626
27.6	-0.01934	0.76391	0.03076	526.192
27.8	-0.01955	0.76191	0.03132	529.133
28	-0.01975	0.7599	0.03188	531.67
28.2	-0.01996	0.75789	0.03244	534.594
28.4	-0.02017	0.75589	0.03301	537.104
28.6	-0.02038	0.75388	0.03358	540.008
28.8	-0.02059	0.75187	0.03415	542.497
29	-0.0208	0.74986	0.03473	545.375
29.2	-0.02101	0.74785	0.03531	547.848
29.4	-0.02122	0.74583	0.03589	550.699
29.6	-0.02143	0.74382	0.03648	553.153
29.8	-0.02165	0.74181	0.03706	555.98
30	-0.02186	0.73979	0.03765	558.412
30.2	-0.02208	0.73777	0.03825	561.22
30.4	-0.02229	0.73576	0.03884	563.624
30.6	-0.02251	0.73374	0.03944	566.415
30.8	-0.02272	0.73172	0.04004	568.794
31	-0.02294	0.7297	0.04064	571.566
31.2	-0.02316	0.72768	0.04124	573.923
31.4	-0.02338	0.72566	0.04185	576.671
31.6	-0.0236	0.72364	0.04245	579.011
31.8	-0.02382	0.72162	0.04306	581.733
32	-0.02404	0.71959	0.04367	584.056
32.2	-0.02426	0.71757	0.04428	586.754
32.4	-0.02448	0.71555	0.0449	589.056
32.6	-0.0247	0.71352	0.04551	591.734
32.8	-0.02493	0.71149	0.04613	594.012
33	-0.02515	0.70947	0.04674	596.672
33.2	-0.02538	0.70744	0.04736	598.925
33.4	-0.0256	0.70541	0.04798	601.567
33.6	-0.02583	0.70338	0.0486	603.797
33.8	-0.02606	0.70135	0.04922	606.418
34	-0.02629	0.69932	0.04984	608.629
34.2	-0.02651	0.69729	0.05046	611.227
34.4	-0.02674	0.69526	0.05109	613.421
34.6	-0.02697	0.69322	0.05171	615.996
34.8	-0.02721	0.69119	0.05233	618.171
35	-0.02744	0.68916	0.05296	620.724
35.2	-0.02767	0.68712	0.05358	622.878
35.4	-0.02791	0.68509	0.05421	625.411
35.6	-0.02814	0.68305	0.05483	627.542
35.8	-0.02838	0.68102	0.05546	630.057
36	-0.02861	0.67899	0.05609	632.165
36.2	-0.02885	0.67695	0.05671	634.662
36.4	-0.02909	0.67492	0.05734	636.749
36.6	-0.02933	0.67288	0.05797	639.226
36.8	-0.02957	0.67085	0.05859	641.295
37	-0.02981	0.66882	0.05922	643.75
37.2	-0.03005	0.66679	0.05985	645.802
37.4	-0.03029	0.66476	0.06047	648.234
37.6	-0.03053	0.66273	0.0611	650.267
37.8	-0.03078	0.6607	0.06173	652.679
38	-0.03102	0.65867	0.06235	654.692
38.2	-0.03127	0.65665	0.06298	657.085
38.4	-0.03151	0.65463	0.0636	659.076
38.6	-0.03176	0.65261	0.06423	661.45
38.8	-0.032	0.65059	0.06486	663.42
39	-0.03225	0.64857	0.06548	665.777
39.2	-0.0325	0.64656	0.06611	667.726
39.4	-0.03275	0.64454	0.06673	670.064
39.6	-0.033	0.64254	0.06735	671.995
39.8	-0.03325	0.64053	0.06798	674.313
40	-0.0335	0.63853	0.0686	676.226
40.2	-0.03375	0.63653	0.06923	678.523
40.4	-0.03401	0.63453	0.06985	680.419
40.6	-0.03426	0.63253	0.07047	682.696
40.8	-0.03452	0.63054	0.07109	684.573
41	-0.03477	0.62856	0.07171	686.83
41.2	-0.03502	0.62658	0.07233	688.687
41.4	-0.03528	0.6246	0.07296	690.927
41.6	-0.03554	0.62263	0.07358	692.763
41.8	-0.03579	0.62066	0.0742	694.985
42	-0.03605	0.61869	0.07482	696.801
42.2	-0.03631	0.61673	0.07543	699.005
42.4	-0.03657	0.61478	0.07605	700.803
42.6	-0.03683	0.61283	0.07667	702.989
42.8	-0.03709	0.61089	0.07729	704.77
43	-0.03735	0.60895	0.07791	706.937
43.2	-0.03761	0.60702	0.07852	708.7
43.4	-0.03787	0.60509	0.07914	710.848
43.6	-0.03813	0.60317	0.07976	712.594
43.8	-0.03839	0.60125	0.08037	714.723
44	-0.03866	0.59934	0.08099	716.451
44.2	-0.03892	0.59744	0.0816	718.561
44.4	-0.03918	0.59554	0.08222	720.27
44.6	-0.03945	0.59365	0.08283	722.362
44.8	-0.03971	0.59176	0.08344	724.052
45	-0.03998	0.58987	0.08406	726.127
45.2	-0.04024	0.588	0.08467	727.798
45.4	-0.04051	0.58613	0.08528	729.856
45.6	-0.04078	0.58426	0.08589	731.509
45.8	-0.04104	0.5824	0.0865	733.55
46	-0.04131	0.58055	0.08711	735.186
46.2	-0.04158	0.5787	0.08772	737.21
46.4	-0.04185	0.57686	0.08833	738.83
46.6	-0.04212	0.57502	0.08894	740.836
46.8	-0.04239	0.57319	0.08955	742.44
47	-0.04266	0.57136	0.09015	744.428
47.2	-0.04293	0.56954	0.09076	746.015
47.4	-0.0432	0.56772	0.09137	747.984
47.6	-0.04347	0.56591	0.09197	749.553
47.8	-0.04375	0.5641	0.09258	751.505
48	-0.04402	0.5623	0.09318	753.056
48.2	-0.0443	0.5605	0.09379	754.992
48.4	-0.04457	0.55871	0.09439	756.525
48.6	-0.04485	0.55693	0.09499	758.443
48.8	-0.04512	0.55514	0.09559	759.959
49	-0.0454	0.55336	0.09619	761.862
49.2	-0.04568	0.55159	0.0968	763.361
49.4	-0.04596	0.54982	0.0974	765.248
49.6	-0.04623	0.54805	0.098	766.731
49.8	-0.04651	0.54628	0.09859	768.602
50	-0.0468	0.54452	0.09919	770.07
50.2	-0.04708	0.54277	0.09979	771.925
50.4	-0.04736	0.54101	0.10039	773.377
50.6	-0.04764	0.53925	0.10098	775.214
50.8	-0.04793	0.5375	0.10158	776.651
51	-0.04821	0.53575	0.10217	778.472
51.2	-0.0485	0.534	0.10277	779.892
51.4	-0.04879	0.53225	0.10336	781.696
51.6	-0.04908	0.53049	0.10395	783.099
51.8	-0.04937	0.52873	0.10454	784.886
52	-0.04967	0.52697	0.10513	786.273
52.2	-0.04996	0.52521	0.10572	788.045
52.4	-0.05026	0.52344	0.1063	789.415
52.6	-0.05056	0.52167	0.10689	791.171
52.8	-0.05086	0.51988	0.10747	792.525
53	-0.05116	0.51809	0.10805	794.267
53.2	-0.05147	0.51629	0.10863	795.606
53.4	-0.05178	0.51447	0.1092	797.333
53.6	-0.0521	0.51265	0.10977	798.657
53.8	-0.05241	0.5108	0.11034	800.369
54	-0.05273	0.50894	0.11091	801.679
54.2	-0.05306	0.50706	0.11147	803.376
54.4	-0.05339	0.50516	0.11202	804.672
54.6	-0.05373	0.50323	0.11257	806.354
54.8	-0.05408	0.50127	0.11311	807.634
55	-0.05443	0.49928	0.11365	809.301
55.2	-0.05478	0.49726	0.11418	810.567
55.4	-0.05515	0.49522	0.11471	812.218
55.6	-0.05552	0.49314	0.11522	813.468
55.8	-0.0559	0.49103	0.11573	815.104
56	-0.05629	0.48888	0.11624	816.339
56.2	-0.05668	0.48671	0.11673	817.959
56.4	-0.05708	0.48452	0.11722	819.179
56.6	-0.05749	0.48231	0.11771	820.785
56.8	-0.0579	0.48008	0.11819	821.989
57	-0.05831	0.47784	0.11867	823.581
57.2	-0.05873	0.47559	0.11915	824.772
57.4	-0.05915	0.47334	0.11962	826.35
57.6	-0.05957	0.47108	0.1201	827.527
57.8	-0.06	0.46882	0.12058	829.092
58	-0.06042	0.46655	0.12106	830.255
58.2	-0.06085	0.46427	0.12154	831.807
58.4	-0.06128	0.46198	0.12202	832.958
58.6	-0.06172	0.45965	0.12251	834.496
58.8	-0.06216	0.45727	0.12299	835.634
59	-0.06261	0.45484	0.12347	837.159
59.2	-0.06307	0.45234	0.12395	838.283
59.4	-0.06354	0.44976	0.12442	839.795
59.6	-0.06403	0.44707	0.12489	840.906
59.8	-0.06453	0.44426	0.12535	842.403
60	-0.06505	0.4413	0.12581	843.501
60.2	-0.0656	0.43815	0.12626	844.984
60.4	-0.06617	0.4348	0.12669	846.068
60.6	-0.06678	0.43118	0.12712	847.538
60.8	-0.06742	0.42725	0.12753	848.607
61	-0.06811	0.42295	0.12793	850.064
61.2	-0.06886	0.41815	0.12832	851.12
61.4	-0.06968	0.41273	0.12867	852.563
61.6	-0.0706	0.4065	0.129	853.606
61.8	-0.07163	0.39929	0.1293	855.037
62	-0.0728	0.39088	0.12955	856.067
62.2	-0.07411	0.38121	0.12976	857.485
62.4	-0.07555	0.3703	0.12995	858.503
62.6	-0.07712	0.3581	0.1301	859.91
62.8	-0.07879	0.3447	0.13023	860.917
63	-0.08056	0.33021	0.13033	862.312
63.2	-0.08239	0.31467	0.13043	863.307
63.4	-0.08425	0.29815	0.13051	864.692
63.6	-0.08618	0.28059	0.13058	865.675
63.8	-0.08824	0.26198	0.13065	867.048
64	-0.09021	0.2442	0.13065	868.059
64.086	-0.09084	0.23672	0.13065	868.271
64.172	-0.09148	0.22834	0.13065	868.61
64.258	-0.09242	0.21911	0.13065	869.145
64.345	-0.09357	0.20986	0.13065	869.658
64.431	-0.09475	0.20108	0.13065	870.149
64.518	-0.09583	0.19299	0.13065	870.63
64.605	-0.09682	0.18557	0.13065	871.107
64.692	-0.09774	0.17872	0.13065	871.578
64.78	-0.09861	0.17234	0.13065	872.044
64.867	-0.09947	0.16637	0.13065	872.505
64.955	-0.1003	0.16074	0.13065	872.96
65.043	-0.10111	0.15539	0.13065	873.41
65.131	-0.10191	0.15026	0.13065	873.856
65.22	-0.10269	0.14529	0.13065	874.299
65.308	-0.10346	0.14046	0.13065	874.742
65.397	-0.10422	0.13571	0.13065	875.185
65.486	-0.10496	0.13105	0.13065	875.63
65.575	-0.10569	0.12646	0.13065	876.076
65.664	-0.1064	0.12191	0.13065	876.524
65.754	-0.10708	0.1174	0.13065	876.975
65.843	-0.10774	0.11289	0.13065	877.429
65.933	-0.10838	0.10839	0.13065	877.888
66.023	-0.10899	0.10392	0.13065	878.351
66.114	-0.10957	0.09949	0.13065	878.82
66.204	-0.11011	0.09514	0.13065	879.293
66.295	-0.1106	0.09092	0.13065	879.769
66.386	-0.11103	0.08683	0.13065	880.247
66.477	-0.1114	0.08288	0.13065	880.727
66.568	-0.11168	0.07905	0.13065	881.208
66.66	-0.11187	0.07533	0.13065	881.692
66.751	-0.11196	0.0717	0.13065	882.176
66.843	-0.11191	0.06813	0.13065	882.663
66.936	-0.11172	0.06458	0.13065	883.152
67.028	-0.11138	0.06103	0.13065	883.643
67.12	-0.1109	0.05746	0.13065	884.138
67.213	-0.11032	0.05387	0.13065	884.635
67.306	-0.10967	0.05025	0.13065	885.136
67.399	-0.10906	0.04663	0.13065	885.64
67.493	-0.10858	0.04308	0.13065	886.149
67.586	-0.10832	0.03972	0.13065	886.662
67.68	-0.10829	0.03662	0.13065	887.179
67.774	-0.10851	0.03384	0.13065	887.699
67.868	-0.10891	0.03141	0.13065	888.217
67.963	-0.10944	0.02929	0.13065	888.732
68.057	-0.11006	0.02742	0.13065	889.242
68.152	-0.11074	0.02577	0.13065	889.749
68.247	-0.11147	0.02432	0.13065	890.253
68.342	-0.11221	0.02303	0.13065	890.753
68.438	-0.11295	0.02191	0.13065	891.249
68.533	-0.11367	0.0209	0.13065	891.739
68.629	-0.11435	0.02	0.13065	892.224
68.726	-0.115	0.01917	0.13065	892.704
68.822	-0.11559	0.01839	0.13065	893.181
68.919	-0.11612	0.01764	0.13065	893.658
69.017	-0.11661	0.01692	0.13065	894.137
69.115	-0.11701	0.01621	0.13065	894.619
69.214	-0.11734	0.01551	0.13065	895.104
69.314	-0.11757	0.01482	0.13065	895.591
69.414	-0.11771	0.01413	0.13065	896.082
69.514	-0.11778	0.01345	0.13065	896.575
69.616	-0.11779	0.01276	0.13065	897.071
69.717	-0.11778	0.01209	0.13065	897.571
69.82	-0.1178	0.01145	0.13065	898.072
69.922	-0.11785	0.01085	0.13065	898.574
70.026	-0.11793	0.01029	0.13065	899.075
70.13	-0.11803	0.00977	0.13065	899.575
70.234	-0.11815	0.00928	0.13065	900.075
70.339	-0.11827	0.00882	0.13065	900.575
70.444	-0.11839	0.00839	0.13065	901.074
70.55	-0.11852	0.00798	0.13065	901.573
70.657	-0.11863	0.0076	0.13065	902.072
70.764	-0.11872	0.00723	0.13065	902.57
70.871	-0.11877	0.00689	0.13065	903.068
70.979	-0.11878	0.00655	0.13065	903.567
71.087	-0.11875	0.00623	0.13065	904.066
71.196	-0.11869	0.00592	0.13065	904.566
71.305	-0.1186	0.00562	0.13065	905.066
71.415	-0.11847	0.00533	0.13065	905.567
71.525	-0.11832	0.00506	0.13065	906.069
71.635	-0.11812	0.00479	0.13065	906.57
71.746	-0.11789	0.00453	0.13065	907.072
71.857	-0.11761	0.00428	0.13065	907.574
71.969	-0.11729	0.00404	0.13065	908.077
72.081	-0.11695	0.0038	0.13065	908.58
72.193	-0.1166	0.00358	0.13065	909.084
72.306	-0.11625	0.00336	0.13065	909.588
72.419	-0.11591	0.00316	0.13065	910.093
72.532	-0.11559	0.00296	0.13065	910.598
72.646	-0.11529	0.00278	0.13065	911.103
72.76	-0.11504	0.0026	0.13065	911.608
72.875	-0.11482	0.00244	0.13065	912.113
72.989	-0.11466	0.00228	0.13065	912.618
73.104	-0.11454	0.00214	0.13065	913.122
73.22	-0.11447	0.00201	0.13065	913.627
73.335	-0.11445	0.00188	0.13065	914.13
73.451	-0.11447	0.00177	0.13065	914.634
73.567	-0.11454	0.00166	0.13065	915.136
73.683	-0.11465	0.00156	0.13065	915.638
73.8	-0.11481	0.00146	0.13065	916.139
73.917	-0.11501	0.00137	0.13065	916.641
74.034	-0.11527	0.00129	0.13065	917.142
74.151	-0.11557	0.00121	0.13065	917.643
74.269	-0.11592	0.00114	0.13065	918.143
74.386	-0.1163	0.00108	0.13065	918.642
74.504	-0.11671	0.00102	0.13065	919.14
74.622	-0.11715	0.00096	0.13065	919.636
74.74	-0.11761	0.00091	0.13065	920.132
74.859	-0.11811	0.00086	0.13065	920.627
74.977	-0.11862	0.00081	0.13065	921.122
75.096	-0.11916	0.00077	0.13065	921.616
75.214	-0.11972	0.00073	0.13065	922.109
75.333	-0.1203	0.00069	0.13065	922.601
75.452	-0.12089	0.00066	0.13065	923.093
75.571	-0.1215	0.00062	0.13065	923.584
75.69	-0.12213	0.00059	0.13065	924.074
75.809	-0.12277	0.00057	0.13065	924.564
75.928	-0.12342	0.00054	0.13065	925.054
76.047	-0.12409	0.00051	0.13065	925.543
76.166	-0.12478	0.00049	0.13065	926.031
76.285	-0.12548	0.00047	0.13065	926.519
76.404	-0.1262	0.00045	0.13065	927.007
76.523	-0.12693	0.00043	0.13065	927.494
76.642	-0.12768	0.00041	0.13065	927.981
76.761	-0.12844	0.00039	0.13065	928.467
76.879	-0.1292	0.00038	0.13065	928.952
76.998	-0.12997	0.00037	0.13065	929.436
77.117	-0.13074	0.00035	0.13065	929.919
77.235	-0.13151	0.00034	0.13065	930.402
77.354	-0.13227	0.00033	0.13065	930.883
77.473	-0.13303	0.00032	0.13065	931.365
77.591	-0.13377	0.00031	0.13065	931.847
77.71	-0.13451	0.0003	0.13065	932.329
77.828	-0.13524	0.0003	0.13065	932.811
77.946	-0.13598	0.00029	0.13065	933.295
78.065	-0.13674	0.00028	0.13065	933.78
78.183	-0.13756	0.00028	0.13065	934.265
78.301	-0.13847	0.00027	0.13065	934.75
78.419	-0.1395	0.00027	0.13065	935.232
78.537	-0.14061	0.00027	0.13065	935.71
78.656	-0.14155	0.00026	0.13065	936.161
78.774	-0.14249	0.00026	0.13065	936.622
