# Supplementary material for: Gas transport in firn: multiple-tracer characterisation and model intercomparison for NEEM, Northern Greenland
Source: Copernicus journal article supplement (doi:10.5194/acp-12-4259-2012), 2012-05-14
Supplement: Supplementary file 11 [file NEEM08_US_CIC.xls]

## Sheet: Diffusivity
depth	Molec diff	Dispersive mixing	Convective mixing
0	1.63895e-05	0	2.42641e-05
0.2	1.63895e-05	0	2.32093e-05
0.4	1.63895e-05	0	2.22003e-05
0.6	1.63895e-05	0	2.12352e-05
0.8	1.63895e-05	0	2.03121e-05
1	1.63895e-05	0	1.94291e-05
1.2	1.63895e-05	0	1.85845e-05
1.4	1.63895e-05	0	1.77766e-05
1.6	1.63895e-05	0	1.70039e-05
1.8	1.63895e-05	0	1.62647e-05
2	1.63895e-05	0	1.55576e-05
2.2	1.63895e-05	0	1.48813e-05
2.4	1.63895e-05	0	1.42344e-05
2.6	1.63895e-05	0	1.36156e-05
2.8	1.63895e-05	0	1.30237e-05
3	1.63895e-05	0	1.24576e-05
3.2	1.63895e-05	0	1.1916e-05
3.4	1.63895e-05	0	1.1398e-05
3.6	1.63895e-05	0	1.09025e-05
3.8	1.63895e-05	0	1.04286e-05
4	1.63895e-05	0	9.97525e-06
4.2	1.63895e-05	0	9.54161e-06
4.4	1.63895e-05	0	9.12683e-06
4.6	1.63895e-05	0	8.73007e-06
4.8	1.63895e-05	0	8.35056e-06
5	1.63895e-05	0	7.98756e-06
5.2	1.63895e-05	0	7.64033e-06
5.4	1.63895e-05	0	7.30819e-06
5.6	1.63895e-05	0	6.9905e-06
5.8	1.63895e-05	0	6.68661e-06
6	1.63895e-05	0	6.39593e-06
6.2	1.63895e-05	0	6.11789e-06
6.4	1.63895e-05	0	5.85194e-06
6.6	1.63895e-05	0	5.59755e-06
6.8	1.63895e-05	0	5.35422e-06
7	1.63895e-05	0	5.12146e-06
7.2	1.63895e-05	0	4.89883e-06
7.4	1.63895e-05	0	4.68587e-06
7.6	1.63895e-05	0	4.48217e-06
7.8	1.63895e-05	0	4.28732e-06
8	1.63895e-05	0	4.10095e-06
8.2	1.63895e-05	0	3.92267e-06
8.4	1.63895e-05	0	3.75215e-06
8.6	1.63895e-05	0	3.58904e-06
8.8	1.63895e-05	0	3.43302e-06
9	1.63831e-05	0	3.28378e-06
9.2	1.61597e-05	0	3.14103e-06
9.4	1.59381e-05	0	3.00449e-06
9.6	1.57182e-05	0	2.87388e-06
9.8	1.55002e-05	0	2.74895e-06
10	1.52839e-05	0	2.62945e-06
10.2	1.50695e-05	0	2.51514e-06
10.4	1.48569e-05	0	2.40581e-06
10.6	1.46463e-05	0	2.30122e-06
10.8	1.44377e-05	0	2.20118e-06
11	1.4231e-05	0	2.1055e-06
11.2	1.40265e-05	0	2.01397e-06
11.4	1.38241e-05	0	1.92642e-06
11.6	1.3624e-05	0	1.84267e-06
11.8	1.34261e-05	0	1.76257e-06
12	1.32307e-05	0	1.68595e-06
12.2	1.30379e-05	0	1.61266e-06
12.4	1.28477e-05	0	1.54256e-06
12.6	1.26602e-05	0	1.4755e-06
12.8	1.24757e-05	0	1.41136e-06
13	1.22942e-05	0	1.35e-06
13.2	1.21158e-05	0	1.29132e-06
13.4	1.19407e-05	0	1.23518e-06
13.6	1.1769e-05	0	1.18149e-06
13.8	1.16008e-05	0	1.13013e-06
14	1.14362e-05	0	1.081e-06
14.2	1.12753e-05	0	1.03401e-06
14.4	1.11181e-05	0	9.89056e-07
14.6	1.09649e-05	0	9.46061e-07
14.8	1.08155e-05	0	9.04934e-07
15	1.067e-05	0	8.65596e-07
15.2	1.05285e-05	0	8.27967e-07
15.4	1.03908e-05	0	7.91974e-07
15.6	1.0257e-05	0	7.57546e-07
15.8	1.0127e-05	0	7.24615e-07
16	1.00008e-05	0	6.93115e-07
16.2	9.87817e-06	0	6.62984e-07
16.4	9.75918e-06	0	6.34163e-07
16.6	9.64369e-06	0	6.06596e-07
16.8	9.5316e-06	0	5.80226e-07
17	9.4228e-06	0	5.55003e-07
17.2	9.31722e-06	0	5.30876e-07
17.4	9.21473e-06	0	5.07798e-07
17.6	9.11527e-06	0	4.85724e-07
17.8	9.01874e-06	0	4.64609e-07
18	8.92507e-06	0	4.44412e-07
18.2	8.83421e-06	0	4.25092e-07
18.4	8.74611e-06	0	4.06613e-07
18.6	8.66073e-06	0	3.88937e-07
18.8	8.57803e-06	0	3.7203e-07
19	8.498e-06	0	3.55857e-07
19.2	8.42063e-06	0	3.40387e-07
19.4	8.34589e-06	0	3.2559e-07
19.6	8.2738e-06	0	3.11437e-07
19.8	8.20436e-06	0	2.97898e-07
20	8.13758e-06	0	2.84948e-07
20.2	8.07347e-06	0	2.72561e-07
20.4	8.01203e-06	0	2.60712e-07
20.6	7.95329e-06	0	2.49379e-07
20.8	7.89725e-06	0	2.38538e-07
21	7.84392e-06	0	2.28169e-07
21.2	7.7933e-06	0	2.1825e-07
21.4	7.74539e-06	0	2.08762e-07
21.6	7.70017e-06	0	1.99687e-07
21.8	7.65765e-06	0	1.91006e-07
22	7.61778e-06	0	1.82703e-07
22.2	7.58055e-06	0	1.74761e-07
22.4	7.54591e-06	0	1.67164e-07
22.6	7.51382e-06	0	1.59897e-07
22.8	7.48422e-06	0	1.52946e-07
23	7.45704e-06	0	1.46297e-07
23.2	7.43221e-06	0	1.39937e-07
23.4	7.40963e-06	0	1.33854e-07
23.6	7.38923e-06	0	1.28035e-07
23.8	7.37087e-06	0	1.2247e-07
24	7.35446e-06	0	1.17146e-07
24.2	7.33986e-06	0	1.12053e-07
24.4	7.32694e-06	0	1.07182e-07
24.6	7.31556e-06	0	1.02523e-07
24.8	7.30557e-06	0	9.80659e-08
25	7.29682e-06	0	9.38029e-08
25.2	7.28915e-06	0	8.97252e-08
25.4	7.28239e-06	0	8.58247e-08
25.6	7.27638e-06	0	8.20938e-08
25.8	7.27095e-06	0	7.85251e-08
26	7.26594e-06	0	7.51115e-08
26.2	7.26118e-06	0	7.18463e-08
26.4	7.25651e-06	0	6.8723e-08
26.6	7.25177e-06	0	6.57356e-08
26.8	7.2468e-06	0	6.2878e-08
27	7.24145e-06	0	6.01446e-08
27.2	7.23558e-06	0	5.753e-08
27.4	7.22904e-06	0	5.50291e-08
27.6	7.22171e-06	0	5.26369e-08
27.8	7.21346e-06	0	5.03487e-08
28	7.20417e-06	0	4.816e-08
28.2	7.19373e-06	0	4.60664e-08
28.4	7.18205e-06	0	4.40639e-08
28.6	7.16901e-06	0	4.21484e-08
28.8	7.15454e-06	0	4.03161e-08
29	7.13855e-06	0	3.85635e-08
29.2	7.12096e-06	0	3.68871e-08
29.4	7.10172e-06	0	3.52836e-08
29.6	7.08074e-06	0	3.37498e-08
29.8	7.05798e-06	0	3.22826e-08
30	7.03337e-06	0	3.08793e-08
30.2	7.00688e-06	0	2.95369e-08
30.4	6.97846e-06	0	2.82529e-08
30.6	6.94807e-06	0	2.70247e-08
30.8	6.91568e-06	0	2.58499e-08
31	6.88127e-06	0	2.47262e-08
31.2	6.84483e-06	0	2.36513e-08
31.4	6.80634e-06	0	2.26231e-08
31.6	6.76581e-06	0	2.16397e-08
31.8	6.72326e-06	0	2.0699e-08
32	6.67871e-06	0	1.97992e-08
32.2	6.6322e-06	0	1.89385e-08
32.4	6.58378e-06	0	1.81152e-08
32.6	6.53353e-06	0	1.73277e-08
32.8	6.48152e-06	0	1.65744e-08
33	6.42785e-06	0	1.58539e-08
33.2	6.37265e-06	0	1.51647e-08
33.4	6.31604e-06	0	1.45055e-08
33.6	6.25816e-06	0	1.38749e-08
33.8	6.19917e-06	0	1.32718e-08
34	6.13923e-06	0	1.26948e-08
34.2	6.07854e-06	0	1.2143e-08
34.4	6.01726e-06	0	1.16151e-08
34.6	5.95558e-06	0	1.11102e-08
34.8	5.8937e-06	0	1.06272e-08
35	5.83179e-06	0	1.01652e-08
35.2	5.77002e-06	0	9.72334e-09
35.4	5.70858e-06	0	9.30065e-09
35.6	5.64761e-06	0	8.89634e-09
35.8	5.58726e-06	0	8.50961e-09
36	5.52764e-06	0	8.13968e-09
36.2	5.46887e-06	0	7.78584e-09
36.4	5.41102e-06	0	7.44738e-09
36.6	5.35415e-06	0	7.12363e-09
36.8	5.29831e-06	0	6.81396e-09
37	5.24352e-06	0	6.51775e-09
37.2	5.18976e-06	0	6.23441e-09
37.4	5.13702e-06	0	5.9634e-09
37.6	5.08527e-06	0	5.70416e-09
37.8	5.03446e-06	0	5.45619e-09
38	4.98452e-06	0	5.219e-09
38.2	4.93538e-06	0	4.99213e-09
38.4	4.88699e-06	0	4.77511e-09
38.6	4.83927e-06	0	4.56753e-09
38.8	4.79215e-06	0	4.36898e-09
39	4.74559e-06	0	4.17905e-09
39.2	4.69953e-06	0	3.99738e-09
39.4	4.65394e-06	0	3.82361e-09
39.6	4.60881e-06	0	3.65739e-09
39.8	4.56413e-06	0	3.4984e-09
40	4.51993e-06	0	3.34632e-09
40.2	4.47622e-06	0	3.20085e-09
40.4	4.43308e-06	0	3.06171e-09
40.6	4.39054e-06	0	2.92861e-09
40.8	4.34871e-06	0	2.8013e-09
41	4.30765e-06	0	2.67953e-09
41.2	4.26746e-06	0	2.56304e-09
41.4	4.22823e-06	0	2.45163e-09
41.6	4.19006e-06	0	2.34505e-09
41.8	4.15303e-06	0	2.24311e-09
42	4.1172e-06	0	2.1456e-09
42.2	4.08265e-06	0	2.05233e-09
42.4	4.04942e-06	0	1.96311e-09
42.6	4.01752e-06	0	1.87777e-09
42.8	3.98696e-06	0	1.79614e-09
43	3.95771e-06	0	1.71806e-09
43.2	3.92971e-06	0	1.64337e-09
43.4	3.90289e-06	0	1.57193e-09
43.6	3.87713e-06	0	1.5036e-09
43.8	3.85232e-06	0	1.43824e-09
44	3.82829e-06	0	1.37571e-09
44.2	3.80488e-06	0	1.31591e-09
44.4	3.7819e-06	0	1.25871e-09
44.6	3.75915e-06	0	1.20399e-09
44.8	3.73641e-06	0	1.15165e-09
45	3.71348e-06	0	1.10159e-09
45.2	3.69015e-06	0	1.0537e-09
45.4	3.66621e-06	0	1.00789e-09
45.6	3.64145e-06	0	9.64079e-10
45.8	3.61571e-06	0	9.22169e-10
46	3.5888e-06	0	8.82081e-10
46.2	3.56059e-06	0	8.43736e-10
46.4	3.53094e-06	0	8.07058e-10
46.6	3.49977e-06	0	7.71974e-10
46.8	3.46698e-06	0	7.38415e-10
47	3.43253e-06	0	7.06315e-10
47.2	3.39639e-06	0	6.75611e-10
47.4	3.35856e-06	0	6.46241e-10
47.6	3.31905e-06	0	6.18148e-10
47.8	3.27792e-06	0	5.91277e-10
48	3.2352e-06	0	5.65573e-10
48.2	3.19098e-06	0	5.40987e-10
48.4	3.14535e-06	0	5.1747e-10
48.6	3.0984e-06	0	4.94975e-10
48.8	3.05025e-06	0	4.73457e-10
49	3.001e-06	0	4.52876e-10
49.2	2.95077e-06	0	4.33189e-10
49.4	2.89969e-06	0	4.14357e-10
49.6	2.84788e-06	0	3.96345e-10
49.8	2.79548e-06	0	3.79115e-10
50	2.7426e-06	0	3.62634e-10
50.2	2.68937e-06	0	3.4687e-10
50.4	2.63594e-06	0	3.31791e-10
50.6	2.58242e-06	0	3.17368e-10
50.8	2.52896e-06	0	3.03572e-10
51	2.47569e-06	0	2.90375e-10
51.2	2.42276e-06	0	2.77752e-10
51.4	2.37031e-06	0	2.65678e-10
51.6	2.31848e-06	0	2.54128e-10
51.8	2.26742e-06	0	2.43081e-10
52	2.21728e-06	0	2.32514e-10
52.2	2.16821e-06	0	2.22406e-10
52.4	2.12034e-06	0	2.12738e-10
52.6	2.0738e-06	0	2.0349e-10
52.8	2.02873e-06	0	1.94644e-10
53	1.98522e-06	0	1.86183e-10
53.2	1.94335e-06	0	1.78089e-10
53.4	1.9032e-06	0	1.70347e-10
53.6	1.86478e-06	0	1.62942e-10
53.8	1.82811e-06	0	1.55859e-10
54	1.79313e-06	0	1.49083e-10
54.2	1.75978e-06	0	1.42603e-10
54.4	1.72794e-06	0	1.36404e-10
54.6	1.69743e-06	0	1.30474e-10
54.8	1.66807e-06	0	1.24802e-10
55	1.63959e-06	0	0
55.2	1.61172e-06	0	0
55.4	1.58413e-06	0	0
55.6	1.55647e-06	0	0
55.8	1.52837e-06	0	0
56	1.49944e-06	0	0
56.2	1.46929e-06	0	0
56.4	1.43753e-06	0	0
56.6	1.4038e-06	0	0
56.8	1.36774e-06	0	0
57	1.32906e-06	0	0
57.2	1.28751e-06	0	0
57.4	1.24289e-06	0	0
57.6	1.19512e-06	0	0
57.8	1.14418e-06	0	0
58	1.09016e-06	0	0
58.2	1.03329e-06	0	0
58.4	9.73848e-07	0	0
58.6	9.12258e-07	3.27385e-13	0
58.8	8.49016e-07	2.32712e-12	0
59	7.84694e-07	7.63505e-12	0
59.2	7.19926e-07	1.78825e-11	0
59.4	6.55387e-07	3.30083e-11	0
59.6	5.91765e-07	5.20289e-11	0
59.8	5.29746e-07	7.31994e-11	0
60	4.69988e-07	9.53883e-11	0
60.2	4.131e-07	1.18101e-10	0
60.4	3.59621e-07	1.41235e-10	0
60.6	3.10031e-07	1.6468e-10	0
60.8	2.64723e-07	1.88315e-10	0
61	2.23902e-07	2.12006e-10	0
61.2	1.87661e-07	2.35614e-10	0
61.4	1.55855e-07	2.58985e-10	0
61.6	1.2828e-07	2.81958e-10	0
61.8	1.05061e-07	3.04367e-10	0
62	8.60167e-08	3.26037e-10	0
62.2	7.04245e-08	3.46796e-10	0
62.4	5.76587e-08	3.66472e-10	0
62.6	4.72069e-08	3.84902e-10	0
62.8	3.86498e-08	4.01937e-10	0
63	3.16438e-08	4.17447e-10	0
63.2	2.59077e-08	4.31324e-10	0
63.4	2.12114e-08	4.43495e-10	0
63.6	1.73665e-08	4.5392e-10	0
63.8	1.42185e-08	4.62601e-10	0
64	1.16411e-08	4.69583e-10	0
64.2	9.53092e-09	4.74961e-10	0
64.4	7.80326e-09	4.78877e-10	0
64.6	6.38877e-09	4.81522e-10	0
64.8	5.23068e-09	4.83383e-10	0
65	4.28252e-09	4.86638e-10	0
65.2	3.50623e-09	4.96676e-10	0
65.4	2.87066e-09	5.22471e-10	0
65.6	2.3503e-09	5.73454e-10	0
65.8	1.93183e-09	6.55808e-10	0
66	1.59606e-09	7.7055e-10	0
66.2	1.32002e-09	9.15404e-10	0
66.4	1.09272e-09	1.08767e-09	0
66.6	9.05267e-10	1.28611e-09	0
66.8	7.5045e-10	1.51117e-09	0
67	6.24468e-10	1.76457e-09	0
67.2	5.24059e-10	2.0487e-09	0
67.4	4.40871e-10	2.3661e-09	0
67.6	3.7092e-10	2.7188e-09	0
67.8	3.12026e-10	3.1078e-09	0
68	2.62399e-10	3.53246e-09	0
68.2	2.20557e-10	3.99013e-09	0
68.4	1.85271e-10	4.47589e-09	0
68.6	1.55516e-10	4.98248e-09	0
68.8	1.30431e-10	5.50062e-09	0
69	1.09295e-10	6.01947e-09	0
69.2	9.14976e-11	6.5274e-09	0
69.4	7.65234e-11	7.01297e-09	0
69.6	6.39359e-11	7.46586e-09	0
69.8	5.33648e-11	7.8778e-09	0
70	4.45292e-11	8.24329e-09	0
70.2	3.71619e-11	8.56001e-09	0
70.4	3.09956e-11	8.82894e-09	0
70.6	2.58278e-11	9.05406e-09	0
70.8	2.14997e-11	9.24184e-09	0
71	1.78779e-11	9.40045e-09	0
71.2	1.485e-11	9.53889e-09	0
71.4	1.25967e-11	9.66603e-09	0
71.6	1.09101e-11	9.78972e-09	0
71.8	9.51505e-12	9.91607e-09	0
72	8.31005e-12	1.00487e-08	0
72.2	7.25979e-12	1.01885e-08	0
72.4	6.34017e-12	1.0333e-08	0
72.6	5.53204e-12	1.04767e-08	0
72.8	4.82008e-12	1.06108e-08	0
73	4.19188e-12	1.0724e-08	0
73.2	3.63727e-12	1.08028e-08	0
73.4	3.14774e-12	1.08325e-08	0
73.6	2.71614e-12	1.07988e-08	0
73.8	2.33627e-12	1.06885e-08	0
74	2.00274e-12	1.04913e-08	0
74.2	1.71075e-12	1.0201e-08	0
74.4	1.456e-12	9.81633e-09	0
74.6	1.23458e-12	9.34163e-09	0
74.8	1.04292e-12	8.78634e-09	0
75	8.77728e-13	8.16443e-09	0
75.2	7.36003e-13	7.49318e-09	0
75.4	6.14971e-13	6.79169e-09	0
75.6	5.12094e-13	6.07953e-09	0
75.8	4.25056e-13	5.37544e-09	0
76	3.51755e-13	4.69636e-09	0
76.2	2.90296e-13	4.05666e-09	0
76.4	2.38985e-13	3.46763e-09	0
76.6	1.96315e-13	2.93718e-09	0
76.8	1.60962e-13	2.46978e-09	0
77	1.31785e-13	2.06655e-09	0
77.2	1.07896e-13	1.72577e-09	0
77.4	8.83381e-14	1.4475e-09	0
77.6	7.23251e-14	1.23367e-09	0
77.8	5.92148e-14	1.08751e-09	0
78	4.8481e-14	1.00112e-09	0
78.2	3.96929e-14	9.5749e-10	0
78.4	3.24978e-14	9.33839e-10	0
78.6	2.66069e-14	9.15859e-10	0
78.8	2.17839e-14	8.97238e-10	0
79	1.78352e-14	8.7764e-10	0

## Sheet: profiles
depth	CO2	CH4	SF6	d15N2
0	382.39	1837.16	6.647	1
0.2	382.599	1837.61	6.64495	1
0.4	382.761	1837.93	6.64352	1
0.6	382.887	1838.18	6.642	1
0.8	382.996	1838.41	6.64038	1
1	383.098	1838.64	6.63869	1
1.2	383.198	1838.87	6.63694	1
1.4	383.299	1839.1	6.63514	1
1.6	383.401	1839.33	6.63329	1
1.8	383.504	1839.57	6.63139	1
2	383.607	1839.81	6.62943	1
2.2	383.711	1840.05	6.62741	1.00001
2.4	383.815	1840.29	6.62534	1.00001
2.6	383.918	1840.53	6.62321	1.00001
2.8	384.022	1840.78	6.62102	1.00001
3	384.125	1841.02	6.61877	1.00001
3.2	384.227	1841.27	6.61647	1.00001
3.4	384.329	1841.51	6.6141	1.00001
3.6	384.43	1841.76	6.61167	1.00001
3.8	384.53	1842	6.60918	1.00001
4	384.63	1842.24	6.60663	1.00001
4.2	384.728	1842.49	6.60402	1.00001
4.4	384.825	1842.73	6.60135	1.00001
4.6	384.921	1842.98	6.59862	1.00001
4.8	385.017	1843.22	6.59583	1.00001
5	385.11	1843.46	6.59297	1.00001
5.2	385.203	1843.7	6.59006	1.00002
5.4	385.294	1843.95	6.58708	1.00002
5.6	385.383	1844.18	6.58405	1.00002
5.8	385.471	1844.42	6.58095	1.00002
6	385.557	1844.66	6.5778	1.00002
6.2	385.642	1844.89	6.57458	1.00002
6.4	385.725	1845.13	6.57131	1.00002
6.6	385.806	1845.36	6.56798	1.00002
6.8	385.885	1845.59	6.5646	1.00002
7	385.963	1845.82	6.56115	1.00002
7.2	386.038	1846.04	6.55765	1.00002
7.4	386.111	1846.27	6.5541	1.00002
7.6	386.183	1846.49	6.55049	1.00002
7.8	386.252	1846.71	6.54683	1.00002
8	386.319	1846.92	6.54312	1.00003
8.2	386.384	1847.14	6.53935	1.00003
8.4	386.447	1847.35	6.53554	1.00003
8.6	386.508	1847.56	6.53167	1.00003
8.8	386.567	1847.77	6.52776	1.00003
9	386.623	1847.97	6.5238	1.00003
9.2	386.677	1848.17	6.51977	1.00003
9.4	386.73	1848.37	6.51565	1.00003
9.6	386.781	1848.57	6.51145	1.00003
9.8	386.831	1848.77	6.50716	1.00003
10	386.878	1848.97	6.50277	1.00003
10.2	386.924	1849.17	6.4983	1.00003
10.4	386.968	1849.37	6.49372	1.00004
10.6	387.01	1849.57	6.48906	1.00004
10.8	387.05	1849.76	6.48429	1.00004
11	387.088	1849.96	6.47943	1.00004
11.2	387.123	1850.15	6.47447	1.00004
11.4	387.157	1850.34	6.46941	1.00004
11.6	387.189	1850.54	6.46425	1.00004
11.8	387.219	1850.73	6.45899	1.00004
12	387.246	1850.91	6.45362	1.00004
12.2	387.271	1851.1	6.44814	1.00004
12.4	387.294	1851.29	6.44256	1.00004
12.6	387.315	1851.47	6.43688	1.00005
12.8	387.333	1851.65	6.43108	1.00005
13	387.349	1851.83	6.42518	1.00005
13.2	387.363	1852.01	6.41916	1.00005
13.4	387.374	1852.19	6.41304	1.00005
13.6	387.383	1852.36	6.40681	1.00005
13.8	387.389	1852.54	6.40046	1.00005
14	387.393	1852.71	6.39401	1.00005
14.2	387.395	1852.87	6.38745	1.00005
14.4	387.394	1853.04	6.38077	1.00005
14.6	387.39	1853.2	6.37399	1.00005
14.8	387.385	1853.36	6.36711	1.00006
15	387.376	1853.52	6.36011	1.00006
15.2	387.365	1853.67	6.35301	1.00006
15.4	387.352	1853.82	6.34581	1.00006
15.6	387.336	1853.97	6.33851	1.00006
15.8	387.318	1854.11	6.33112	1.00006
16	387.297	1854.25	6.32363	1.00006
16.2	387.274	1854.39	6.31605	1.00006
16.4	387.248	1854.52	6.30838	1.00006
16.6	387.221	1854.65	6.30062	1.00006
16.8	387.19	1854.78	6.29278	1.00006
17	387.158	1854.9	6.28485	1.00007
17.2	387.123	1855.02	6.27684	1.00007
17.4	387.087	1855.14	6.26875	1.00007
17.6	387.048	1855.25	6.26058	1.00007
17.8	387.006	1855.35	6.25234	1.00007
18	386.963	1855.46	6.24401	1.00007
18.2	386.918	1855.56	6.23562	1.00007
18.4	386.871	1855.65	6.22715	1.00007
18.6	386.822	1855.74	6.21861	1.00007
18.8	386.771	1855.83	6.21001	1.00007
19	386.718	1855.91	6.20134	1.00007
19.2	386.664	1855.99	6.19261	1.00008
19.4	386.608	1856.06	6.18381	1.00008
19.6	386.55	1856.13	6.17496	1.00008
19.8	386.49	1856.2	6.16605	1.00008
20	386.43	1856.26	6.15709	1.00008
20.2	386.367	1856.32	6.14808	1.00008
20.4	386.303	1856.38	6.13902	1.00008
20.6	386.238	1856.43	6.12992	1.00008
20.8	386.172	1856.47	6.12077	1.00008
21	386.105	1856.52	6.11159	1.00008
21.2	386.036	1856.55	6.10237	1.00008
21.4	385.967	1856.59	6.09312	1.00009
21.6	385.896	1856.62	6.08384	1.00009
21.8	385.825	1856.65	6.07453	1.00009
22	385.752	1856.67	6.06521	1.00009
22.2	385.679	1856.69	6.05586	1.00009
22.4	385.606	1856.71	6.0465	1.00009
22.6	385.531	1856.72	6.03713	1.00009
22.8	385.457	1856.73	6.02775	1.00009
23	385.381	1856.74	6.01837	1.00009
23.2	385.306	1856.74	6.00899	1.00009
23.4	385.229	1856.74	5.99961	1.00009
23.6	385.153	1856.74	5.99024	1.0001
23.8	385.077	1856.73	5.98087	1.0001
24	385	1856.72	5.97152	1.0001
24.2	384.923	1856.71	5.96218	1.0001
24.4	384.846	1856.69	5.95286	1.0001
24.6	384.77	1856.68	5.94356	1.0001
24.8	384.693	1856.66	5.93429	1.0001
25	384.616	1856.63	5.92504	1.0001
25.2	384.54	1856.61	5.91581	1.0001
25.4	384.464	1856.58	5.90661	1.0001
25.6	384.388	1856.55	5.89745	1.00011
25.8	384.312	1856.52	5.88831	1.00011
26	384.237	1856.49	5.87921	1.00011
26.2	384.161	1856.45	5.87013	1.00011
26.4	384.087	1856.41	5.8611	1.00011
26.6	384.012	1856.38	5.85209	1.00011
26.8	383.938	1856.33	5.84312	1.00011
27	383.865	1856.29	5.83418	1.00011
27.2	383.791	1856.25	5.82528	1.00011
27.4	383.719	1856.2	5.81641	1.00011
27.6	383.646	1856.15	5.80757	1.00011
27.8	383.575	1856.1	5.79876	1.00012
28	383.503	1856.05	5.78998	1.00012
28.2	383.432	1856	5.78124	1.00012
28.4	383.362	1855.95	5.77252	1.00012
28.6	383.292	1855.89	5.76383	1.00012
28.8	383.222	1855.84	5.75516	1.00012
29	383.153	1855.78	5.74652	1.00012
29.2	383.085	1855.72	5.7379	1.00012
29.4	383.016	1855.66	5.7293	1.00012
29.6	382.949	1855.6	5.72072	1.00012
29.8	382.881	1855.54	5.71216	1.00013
30	382.814	1855.48	5.70361	1.00013
30.2	382.748	1855.42	5.69508	1.00013
30.4	382.682	1855.35	5.68656	1.00013
30.6	382.616	1855.29	5.67804	1.00013
30.8	382.551	1855.22	5.66954	1.00013
31	382.486	1855.16	5.66103	1.00013
31.2	382.422	1855.09	5.65253	1.00013
31.4	382.357	1855.02	5.64403	1.00013
31.6	382.294	1854.95	5.63553	1.00013
31.8	382.23	1854.88	5.62702	1.00013
32	382.167	1854.81	5.6185	1.00014
32.2	382.104	1854.74	5.60997	1.00014
32.4	382.041	1854.66	5.60143	1.00014
32.6	381.979	1854.59	5.59287	1.00014
32.8	381.917	1854.52	5.5843	1.00014
33	381.855	1854.44	5.5757	1.00014
33.2	381.793	1854.37	5.56708	1.00014
33.4	381.732	1854.29	5.55843	1.00014
33.6	381.671	1854.21	5.54976	1.00014
33.8	381.609	1854.13	5.54106	1.00014
34	381.549	1854.06	5.53232	1.00015
34.2	381.488	1853.98	5.52356	1.00015
34.4	381.427	1853.9	5.51475	1.00015
34.6	381.367	1853.81	5.50591	1.00015
34.8	381.307	1853.73	5.49703	1.00015
35	381.247	1853.65	5.48812	1.00015
35.2	381.187	1853.57	5.47916	1.00015
35.4	381.127	1853.48	5.47016	1.00015
35.6	381.067	1853.4	5.46112	1.00015
35.8	381.008	1853.32	5.45205	1.00015
36	380.948	1853.23	5.44293	1.00015
36.2	380.889	1853.14	5.43377	1.00016
36.4	380.83	1853.06	5.42458	1.00016
36.6	380.771	1852.97	5.41534	1.00016
36.8	380.712	1852.88	5.40607	1.00016
37	380.654	1852.8	5.39677	1.00016
37.2	380.596	1852.71	5.38743	1.00016
37.4	380.537	1852.62	5.37805	1.00016
37.6	380.48	1852.53	5.36865	1.00016
37.8	380.422	1852.44	5.35921	1.00016
38	380.364	1852.35	5.34974	1.00016
38.2	380.307	1852.26	5.34024	1.00017
38.4	380.25	1852.17	5.33072	1.00017
38.6	380.193	1852.09	5.32117	1.00017
38.8	380.136	1852	5.31159	1.00017
39	380.08	1851.91	5.30198	1.00017
39.2	380.024	1851.82	5.29235	1.00017
39.4	379.968	1851.73	5.2827	1.00017
39.6	379.912	1851.64	5.27302	1.00017
39.8	379.856	1851.55	5.26332	1.00017
40	379.801	1851.46	5.25359	1.00017
40.2	379.745	1851.37	5.24384	1.00018
40.4	379.69	1851.28	5.23407	1.00018
40.6	379.636	1851.19	5.22428	1.00018
40.8	379.581	1851.1	5.21447	1.00018
41	379.527	1851.01	5.20465	1.00018
41.2	379.473	1850.93	5.1948	1.00018
41.4	379.419	1850.84	5.18495	1.00018
41.6	379.365	1850.75	5.17508	1.00018
41.8	379.311	1850.66	5.16519	1.00018
42	379.258	1850.58	5.15531	1.00018
42.2	379.205	1850.49	5.14541	1.00018
42.4	379.152	1850.41	5.13552	1.00019
42.6	379.1	1850.32	5.12563	1.00019
42.8	379.047	1850.24	5.11574	1.00019
43	378.995	1850.15	5.10587	1.00019
43.2	378.943	1850.07	5.096	1.00019
43.4	378.892	1849.99	5.08616	1.00019
43.6	378.841	1849.9	5.07633	1.00019
43.8	378.79	1849.82	5.06652	1.00019
44	378.739	1849.74	5.05674	1.00019
44.2	378.689	1849.66	5.04699	1.00019
44.4	378.639	1849.58	5.03726	1.0002
44.6	378.589	1849.51	5.02756	1.0002
44.8	378.54	1849.43	5.0179	1.0002
45	378.491	1849.35	5.00826	1.0002
45.2	378.442	1849.28	4.99866	1.0002
45.4	378.394	1849.21	4.98909	1.0002
45.6	378.345	1849.13	4.97954	1.0002
45.8	378.297	1849.06	4.97003	1.0002
46	378.249	1848.99	4.96054	1.0002
46.2	378.202	1848.92	4.95107	1.0002
46.4	378.154	1848.85	4.94162	1.0002
46.6	378.107	1848.78	4.93218	1.00021
46.8	378.06	1848.71	4.92276	1.00021
47	378.013	1848.64	4.91334	1.00021
47.2	377.966	1848.57	4.90393	1.00021
47.4	377.919	1848.51	4.89452	1.00021
47.6	377.872	1848.44	4.8851	1.00021
47.8	377.825	1848.38	4.87567	1.00021
48	377.778	1848.31	4.86623	1.00021
48.2	377.73	1848.25	4.85676	1.00021
48.4	377.683	1848.19	4.84728	1.00021
48.6	377.636	1848.12	4.83776	1.00022
48.8	377.588	1848.06	4.82821	1.00022
49	377.54	1848	4.81862	1.00022
49.2	377.492	1847.94	4.80899	1.00022
49.4	377.444	1847.87	4.79932	1.00022
49.6	377.395	1847.81	4.78959	1.00022
49.8	377.346	1847.75	4.77981	1.00022
50	377.297	1847.69	4.76998	1.00022
50.2	377.247	1847.63	4.76008	1.00022
50.4	377.197	1847.57	4.75011	1.00022
50.6	377.147	1847.51	4.74008	1.00022
50.8	377.096	1847.45	4.72998	1.00023
51	377.045	1847.39	4.7198	1.00023
51.2	376.993	1847.34	4.70956	1.00023
51.4	376.941	1847.28	4.69923	1.00023
51.6	376.888	1847.22	4.68884	1.00023
51.8	376.835	1847.16	4.67836	1.00023
52	376.781	1847.1	4.66781	1.00023
52.2	376.727	1847.04	4.65719	1.00023
52.4	376.673	1846.99	4.6465	1.00023
52.6	376.618	1846.93	4.63574	1.00023
52.8	376.562	1846.87	4.62492	1.00024
53	376.506	1846.82	4.61404	1.00024
53.2	376.45	1846.76	4.60311	1.00024
53.4	376.393	1846.7	4.59215	1.00024
53.6	376.336	1846.65	4.58115	1.00024
53.8	376.279	1846.59	4.57012	1.00024
54	376.221	1846.54	4.55909	1.00024
54.2	376.163	1846.48	4.54805	1.00024
54.4	376.105	1846.43	4.53702	1.00024
54.6	376.047	1846.37	4.526	1.00024
54.8	375.99	1846.32	4.51502	1.00024
55	375.932	1846.27	4.50407	1.00025
55.2	375.874	1846.22	4.49316	1.00025
55.4	375.816	1846.17	4.4823	1.00025
55.6	375.758	1846.12	4.47149	1.00025
55.8	375.7	1846.07	4.46074	1.00025
56	375.643	1846.02	4.45003	1.00025
56.2	375.585	1845.97	4.43938	1.00025
56.4	375.528	1845.92	4.42876	1.00025
56.6	375.47	1845.87	4.41817	1.00025
56.8	375.413	1845.82	4.40759	1.00025
57	375.355	1845.77	4.39702	1.00026
57.2	375.297	1845.73	4.38641	1.00026
57.4	375.238	1845.68	4.37576	1.00026
57.6	375.179	1845.63	4.36503	1.00026
57.8	375.118	1845.58	4.35418	1.00026
58	375.057	1845.53	4.34318	1.00026
58.2	374.994	1845.48	4.33198	1.00026
58.4	374.93	1845.43	4.32054	1.00026
58.6	374.864	1845.37	4.30878	1.00026
58.8	374.795	1845.31	4.29664	1.00026
59	374.723	1845.26	4.28405	1.00026
59.2	374.648	1845.19	4.27092	1.00027
59.4	374.568	1845.13	4.25714	1.00027
59.6	374.484	1845.06	4.24259	1.00027
59.8	374.394	1844.98	4.22714	1.00027
60	374.297	1844.9	4.2106	1.00027
60.2	374.192	1844.81	4.1928	1.00027
60.4	374.078	1844.71	4.17349	1.00027
60.6	373.952	1844.6	4.15241	1.00027
60.8	373.813	1844.48	4.12922	1.00027
61	373.658	1844.33	4.10356	1.00027
61.2	373.483	1844.17	4.07499	1.00027
61.4	373.287	1843.98	4.043	1.00028
61.6	373.064	1843.76	4.00699	1.00028
61.8	372.809	1843.5	3.96632	1.00028
62	372.519	1843.19	3.92043	1.00028
62.2	372.191	1842.82	3.8689	1.00028
62.4	371.819	1842.38	3.8113	1.00028
62.6	371.402	1841.87	3.74726	1.00028
62.8	370.934	1841.26	3.67646	1.00028
63	370.413	1840.54	3.59862	1.00028
63.2	369.836	1839.69	3.51358	1.00028
63.4	369.199	1838.68	3.42127	1.00028
63.6	368.501	1837.5	3.32176	1.00028
63.8	367.739	1836.1	3.21522	1.00028
64	366.913	1834.47	3.102	1.00029
64.2	366.023	1832.56	2.98255	1.00029
64.4	365.069	1830.33	2.85746	1.00029
64.6	364.052	1827.74	2.72742	1.00029
64.8	362.973	1824.73	2.59312	1.00029
65	361.832	1821.26	2.45524	1.00029
65.2	360.63	1817.24	2.31432	1.00029
65.4	359.365	1812.59	2.1709	1.00029
65.6	358.035	1807.21	2.02567	1.00029
65.8	356.641	1800.97	1.87982	1.00029
66	355.188	1793.78	1.7352	1.00029
66.2	353.682	1785.52	1.59371	1.00029
66.4	352.128	1776.08	1.45696	1.00029
66.6	350.53	1765.33	1.32626	1.00029
66.8	348.893	1753.19	1.20265	1.00029
67	347.225	1739.64	1.0869	1.00029
67.2	345.541	1724.76	0.97966	1.00029
67.4	343.856	1708.73	0.881277	1.00029
67.6	342.19	1691.76	0.791829	1.00029
67.8	340.56	1674.15	0.711174	1.00029
68	338.984	1656.21	0.638975	1.00029
68.2	337.474	1638.24	0.57473	1.00029
68.4	336.042	1620.49	0.517812	1.00029
68.6	334.691	1603.16	0.467524	1.00029
68.8	333.425	1586.4	0.423138	1.00029
69	332.239	1570.27	0.383942	1.00029
69.2	331.131	1554.82	0.349262	1.00029
69.4	330.095	1540.04	0.318486	1.00029
69.6	329.124	1525.89	0.291066	1.00029
69.8	328.211	1512.34	0.266529	1.00029
70	327.35	1499.33	0.244466	1.00029
70.2	326.534	1486.81	0.224534	1.00029
70.4	325.759	1474.72	0.206445	1.00029
70.6	325.019	1463.01	0.18996	1.00029
70.8	324.312	1451.65	0.174885	1.00029
71	323.633	1440.61	0.161059	1.00029
71.2	322.98	1429.86	0.148354	1.00029
71.4	322.353	1419.39	0.136666	1.00029
71.6	321.749	1409.22	0.12591	1.00029
71.8	321.169	1399.33	0.116016	1.00029
72	320.612	1389.74	0.106924	1.00029
72.2	320.079	1380.47	0.0985793	1.00029
72.4	319.57	1371.53	0.0909335	1.00029
72.6	319.084	1362.93	0.0839383	1.00029
72.8	318.622	1354.67	0.0775462	1.00029
73	318.183	1346.77	0.0717097	1.00029
73.2	317.766	1339.2	0.0663811	1.00029
73.4	317.369	1331.97	0.0615131	1.00029
73.6	316.993	1325.04	0.0570594	1.00029
73.8	316.634	1318.4	0.0529755	1.00029
74	316.291	1312.02	0.0492193	1.00029
74.2	315.963	1305.87	0.0457517	1.00029
74.4	315.647	1299.91	0.0425371	1.00029
74.6	315.341	1294.11	0.0395435	1.00029
74.8	315.043	1288.44	0.0367426	1.00029
75	314.752	1282.86	0.0341098	1.00029
75.2	314.466	1277.35	0.0316243	1.00029
75.4	314.183	1271.87	0.0292684	1.00029
75.6	313.902	1266.4	0.027028	1.00029
75.8	313.622	1260.92	0.0248919	1.00029
76	313.341	1255.39	0.0228515	1.00029
76.2	313.059	1249.81	0.0209011	1.00029
76.4	312.774	1244.16	0.0190374	1.00029
76.6	312.487	1238.43	0.0172594	1.00029
76.8	312.197	1232.6	0.0155676	1.00029
77	311.903	1226.68	0.0139632	1.00029
77.2	311.607	1220.66	0.0124493	1.00029
77.4	311.307	1214.55	0.0110295	1.00029
77.6	311.004	1208.36	0.00970833	1.00029
77.8	310.701	1202.13	0.0084945	1.00029
78	310.402	1195.97	0.00740257	1.00029
78.2	310.116	1190.04	0.00644898	1.00029
78.4	309.852	1184.57	0.00564841	1.00029
78.6	309.659	1180.57	0.00508932	1.00029
78.8	309.33	1173.74	0.00428197	1.00029
79	309.009	1167.06	0.0035881	1.00029

## Sheet: scenarios
depth	SCEN1	SCEN2	SCEN3	SCEN4
0	0	1	0	0
0.2	-2.21164e-05	0.999378	1.50908e-05	5.00607
0.4	-4.53841e-05	0.998775	3.08489e-05	9.99546
0.6	-6.98642e-05	0.998185	4.73029e-05	14.9602
0.8	-9.559e-05	0.997552	6.44831e-05	19.9012
1	-0.000122598	0.996902	8.24207e-05	24.8184
1.2	-0.000150924	0.996236	0.000101148	29.7118
1.4	-0.000180602	0.995555	0.0001207	34.5814
1.6	-0.000211665	0.994857	0.000141111	39.4273
1.8	-0.000244145	0.994142	0.000162417	44.2493
2	-0.000278073	0.993412	0.000184658	49.0476
2.2	-0.000313477	0.992665	0.000207873	53.8221
2.4	-0.000350386	0.991901	0.000232103	58.5728
2.6	-0.000388824	0.991121	0.000257391	63.2997
2.8	-0.000428816	0.990325	0.000283782	68.0029
3	-0.000470384	0.989513	0.000311323	72.6823
3.2	-0.000513548	0.988684	0.000340061	77.3379
3.4	-0.000558325	0.987839	0.000370046	81.9697
3.6	-0.000604731	0.986977	0.000401331	86.5778
3.8	-0.000652781	0.9861	0.00043397	91.1621
4	-0.000702484	0.985207	0.000468018	95.7227
4.2	-0.000753849	0.984299	0.000503534	100.259
4.4	-0.000806884	0.983375	0.000540579	104.773
4.6	-0.000861593	0.982435	0.000579213	109.262
4.8	-0.000917978	0.981481	0.000619503	113.727
5	-0.000976038	0.980511	0.000661516	118.169
5.2	-0.00103577	0.979527	0.00070532	122.587
5.4	-0.00109717	0.978528	0.000750989	126.982
5.6	-0.00116024	0.977515	0.000798596	131.352
5.8	-0.00122496	0.976488	0.000848218	135.699
6	-0.00129132	0.975447	0.000899936	140.023
6.2	-0.00135931	0.974392	0.000953831	144.322
6.4	-0.00142892	0.973323	0.00100999	148.599
6.6	-0.00150013	0.972242	0.0010685	152.85
6.8	-0.00157292	0.971147	0.00112945	157.08
7	-0.00164728	0.97004	0.00119293	161.283
7.2	-0.00172318	0.968921	0.00125905	165.467
7.4	-0.00180059	0.967789	0.00132789	169.622
7.6	-0.00187951	0.966645	0.00139957	173.761
7.8	-0.0019599	0.96549	0.00147418	177.865
8	-0.00204174	0.964323	0.00155184	181.962
8.2	-0.002125	0.963145	0.00163266	186.012
8.4	-0.00220965	0.961955	0.00171675	190.071
8.6	-0.00229567	0.960755	0.00180422	194.063
8.8	-0.00238303	0.959545	0.00189521	198.09
9	-0.00247171	0.958322	0.0019898	202.017
9.2	-0.00256208	0.957081	0.00208746	206.02
9.4	-0.00265458	0.955818	0.0021876	209.873
9.6	-0.00274922	0.954531	0.00229025	213.863
9.8	-0.00284606	0.953218	0.00239544	217.63
10	-0.00294511	0.95188	0.00250323	221.619
10.2	-0.00304642	0.950517	0.00261364	225.29
10.4	-0.00315001	0.949127	0.00272672	229.287
10.6	-0.00325592	0.94771	0.00284251	232.856
10.8	-0.00336419	0.946267	0.00296103	236.866
11	-0.00347486	0.944796	0.00308233	240.332
11.2	-0.00358795	0.943298	0.00320644	244.35
11.4	-0.0037035	0.941772	0.0033334	247.724
11.6	-0.00382155	0.940218	0.00346325	251.735
11.8	-0.00394213	0.938635	0.00359601	255.039
12	-0.00406528	0.937024	0.00373174	259.02
12.2	-0.00419103	0.935383	0.00387045	262.279
12.4	-0.00431941	0.933713	0.0040122	266.206
12.6	-0.00445044	0.932014	0.00415701	269.445
12.8	-0.00458417	0.930285	0.00430493	273.297
13	-0.00472061	0.928526	0.004456	276.53
13.2	-0.00485978	0.926737	0.00461026	280.305
13.4	-0.00500171	0.924919	0.00476775	283.529
13.6	-0.00514641	0.92307	0.00492851	287.24
13.8	-0.00529389	0.921192	0.00509261	290.438
14	-0.00544416	0.919284	0.00526008	294.107
14.2	-0.00559722	0.917347	0.00543098	297.258
14.4	-0.00575306	0.915381	0.00560536	300.909
14.6	-0.00591168	0.913386	0.0057833	303.998
14.8	-0.00607306	0.911363	0.00596484	307.642
15	-0.00623717	0.909312	0.00615006	310.671
15.2	-0.00640399	0.907235	0.00633903	314.302
15.4	-0.00657347	0.905131	0.00653182	317.288
15.6	-0.00674557	0.903002	0.0067285	320.89
15.8	-0.00692023	0.900848	0.00692915	323.857
16	-0.00709739	0.898671	0.00713387	327.414
16.2	-0.00727699	0.896472	0.00734272	330.379
16.4	-0.00745898	0.894251	0.00755579	333.889
16.6	-0.00764334	0.892008	0.00777316	336.848
16.8	-0.00783004	0.889746	0.00799489	340.323
17	-0.00801905	0.887463	0.00822105	343.261
17.2	-0.00821034	0.885161	0.00845173	346.718
17.4	-0.00840387	0.88284	0.00868699	349.619
17.6	-0.00859961	0.880501	0.00892691	353.071
17.8	-0.00879753	0.878145	0.00917154	355.928
18	-0.00899757	0.875772	0.00942097	359.373
18.2	-0.00919972	0.873383	0.00967526	362.198
18.4	-0.00940392	0.870978	0.00993448	365.62
18.6	-0.00961013	0.868559	0.0101987	368.428
18.8	-0.00981831	0.866126	0.010468	371.814
19	-0.0100284	0.863679	0.0107424	374.615
19.2	-0.0102404	0.86122	0.011022	377.962
19.4	-0.0104542	0.85875	0.0113068	380.752
19.6	-0.0106697	0.856268	0.011597	384.069
19.8	-0.010887	0.853777	0.0118926	386.835
20	-0.0111059	0.851277	0.0121937	390.138
20.2	-0.0113263	0.848768	0.0125002	392.867
20.4	-0.0115483	0.846252	0.0128124	396.162
20.6	-0.0117718	0.84373	0.0131303	398.855
20.8	-0.0119966	0.841202	0.0134539	402.135
21	-0.0122227	0.83867	0.0137833	404.804
21.2	-0.01245	0.836135	0.0141187	408.056
21.4	-0.0126785	0.833597	0.0144599	410.713
21.6	-0.012908	0.831058	0.0148072	413.929
21.8	-0.0131384	0.828518	0.0151607	416.576
22	-0.0133698	0.82598	0.0155203	419.761
22.2	-0.0136019	0.823443	0.0158861	422.388
22.4	-0.0138348	0.820908	0.0162582	425.553
22.6	-0.0140682	0.818378	0.0166368	428.15
22.8	-0.0143022	0.815852	0.0170217	431.304
23	-0.0145366	0.813332	0.0174132	433.867
23.2	-0.0147714	0.810818	0.0178111	437.008
23.4	-0.0150064	0.808312	0.0182157	439.544
23.6	-0.0152416	0.805814	0.0186269	442.661
23.8	-0.0154769	0.803326	0.0190448	445.182
24	-0.0157122	0.800847	0.0194694	448.267
24.2	-0.0159474	0.798379	0.0199006	450.776
24.4	-0.0161825	0.795922	0.0203386	453.831
24.6	-0.0164174	0.793477	0.0207833	456.323
24.8	-0.016652	0.791044	0.0212347	459.356
25	-0.0168863	0.788624	0.0216927	461.821
25.2	-0.0171203	0.786217	0.0221575	464.84
25.4	-0.0173538	0.783824	0.0226288	467.275
25.6	-0.0175868	0.781444	0.0231067	470.28
25.8	-0.0178194	0.779078	0.0235911	472.688
26	-0.0180514	0.776727	0.0240819	475.673
26.2	-0.0182829	0.774389	0.024579	478.062
26.4	-0.0185138	0.772066	0.0250824	481.02
26.6	-0.0187442	0.769757	0.025592	483.395
26.8	-0.0189739	0.767462	0.0261075	486.323
27	-0.0192031	0.76518	0.026629	488.683
27.2	-0.0194316	0.762913	0.0271563	491.588
27.4	-0.0196596	0.760659	0.0276892	493.925
27.6	-0.019887	0.758418	0.0282276	496.813
27.8	-0.0201139	0.756189	0.0287713	499.122
28	-0.0203402	0.753973	0.0293203	501.996
28.2	-0.020566	0.75177	0.0298743	504.278
28.4	-0.0207913	0.749578	0.0304332	507.135
28.6	-0.0210162	0.747397	0.0309968	509.396
28.8	-0.0212406	0.745227	0.0315649	512.229
29	-0.0214646	0.743067	0.0321374	514.474
29.2	-0.0216883	0.740917	0.0327141	517.28
29.4	-0.0219117	0.738777	0.0332948	519.511
29.6	-0.0221349	0.736645	0.0338794	522.291
29.8	-0.0223578	0.734521	0.0344676	524.503
30	-0.0225805	0.732405	0.0350592	527.264
30.2	-0.0228031	0.730296	0.0356542	529.451
30.4	-0.0230257	0.728194	0.0362523	532.197
30.6	-0.0232482	0.726098	0.0368533	534.358
30.8	-0.0234708	0.724006	0.0374571	537.089
31	-0.0236935	0.72192	0.0380634	539.227
31.2	-0.0239164	0.719838	0.0386721	541.937
31.4	-0.0241395	0.717759	0.0392831	544.057
31.6	-0.0243629	0.715683	0.039896	546.743
31.8	-0.0245867	0.71361	0.0405108	548.848
32	-0.0248108	0.711538	0.0411272	551.509
32.2	-0.0250355	0.709467	0.0417451	553.597
32.4	-0.0252607	0.707396	0.0423644	556.236
32.6	-0.0254866	0.705326	0.0429847	558.304
32.8	-0.0257131	0.703255	0.0436061	560.926
33	-0.0259404	0.701183	0.0442282	562.97
33.2	-0.0261685	0.699109	0.044851	565.577
33.4	-0.0263975	0.697033	0.0454743	567.597
33.6	-0.0266274	0.694954	0.0460979	570.187
33.8	-0.0268584	0.692872	0.0467216	572.186
34	-0.0270903	0.690787	0.0473455	574.756
34.2	-0.0273234	0.688698	0.0479692	576.738
34.4	-0.0275577	0.686606	0.0485928	579.284
34.6	-0.0277931	0.684509	0.049216	581.251
34.8	-0.0280297	0.682408	0.0498389	583.774
35	-0.0282676	0.680302	0.0504612	585.724
35.2	-0.0285067	0.678193	0.0510829	588.226
35.4	-0.0287471	0.676079	0.051704	590.156
35.6	-0.0289888	0.673961	0.0523244	592.642
35.8	-0.0292317	0.671839	0.052944	594.549
36	-0.0294759	0.669713	0.0535628	597.02
36.2	-0.0297214	0.667584	0.0541807	598.905
36.4	-0.0299681	0.665452	0.0547977	601.359
36.6	-0.030216	0.663318	0.0554139	603.224
36.8	-0.0304651	0.661181	0.0560292	605.659
37	-0.0307154	0.659043	0.0566435	607.507
37.2	-0.0309669	0.656903	0.057257	609.92
37.4	-0.0312194	0.654762	0.0578695	611.752
37.6	-0.031473	0.652621	0.0584812	614.143
37.8	-0.0317276	0.650481	0.0590919	615.959
38	-0.0319832	0.64834	0.0597017	618.33
38.2	-0.0322398	0.646201	0.0603106	620.127
38.4	-0.0324974	0.644063	0.0609186	622.481
38.6	-0.0327559	0.641926	0.0615256	624.257
38.8	-0.0330153	0.639792	0.0621318	626.596
39	-0.0332756	0.63766	0.062737	628.352
39.2	-0.0335368	0.635531	0.0633413	630.674
39.4	-0.0337988	0.633405	0.0639446	632.41
39.6	-0.0340617	0.631283	0.064547	634.715
39.8	-0.0343254	0.629164	0.0651484	636.433
40	-0.0345899	0.627049	0.0657488	638.718
40.2	-0.0348552	0.624938	0.0663483	640.42
40.4	-0.0351212	0.622832	0.0669468	642.684
40.6	-0.035388	0.620731	0.0675443	644.371
40.8	-0.0356555	0.618636	0.0681408	646.615
41	-0.0359237	0.616546	0.0687364	648.285
41.2	-0.0361925	0.614463	0.0693311	650.511
41.4	-0.0364619	0.612387	0.069925	652.163
41.6	-0.0367318	0.610319	0.0705181	654.373
41.8	-0.0370021	0.608259	0.0711105	656.005
42	-0.0372728	0.606207	0.0717023	658.2
42.2	-0.0375438	0.604166	0.0722936	659.813
42.4	-0.037815	0.602135	0.0728844	661.992
42.6	-0.0380863	0.600115	0.073475	663.586
42.8	-0.0383576	0.598107	0.0740653	665.748
43	-0.0386288	0.596112	0.0746556	667.325
43.2	-0.0388998	0.59413	0.0752459	669.468
43.4	-0.0391705	0.592162	0.0758365	671.029
43.6	-0.0394409	0.590208	0.0764273	673.154
43.8	-0.0397108	0.58827	0.0770185	674.699
44	-0.0399801	0.586348	0.0776103	676.805
44.2	-0.0402489	0.584441	0.0782027	678.334
44.4	-0.040517	0.58255	0.0787958	680.422
44.6	-0.0407845	0.580675	0.0793896	681.935
44.8	-0.0410512	0.578817	0.0799842	684.007
45	-0.0413171	0.576975	0.0805796	685.502
45.2	-0.0415824	0.575149	0.0811758	687.559
45.4	-0.0418469	0.573339	0.0817729	689.036
45.6	-0.0421108	0.571543	0.0823707	691.078
45.8	-0.0423741	0.569763	0.0829692	692.537
46	-0.0426367	0.567997	0.0835684	694.563
46.2	-0.0428989	0.566244	0.0841681	696.005
46.4	-0.0431607	0.564504	0.0847683	698.015
46.6	-0.0434221	0.562776	0.0853688	699.441
46.8	-0.0436834	0.56106	0.0859695	701.432
47	-0.0439445	0.559354	0.0865703	702.843
47.2	-0.0442056	0.557657	0.087171	704.817
47.4	-0.0444669	0.55597	0.0877714	706.213
47.6	-0.0447284	0.55429	0.0883715	708.169
47.8	-0.0449903	0.552618	0.0889709	709.55
48	-0.0452527	0.550952	0.0895696	711.49
48.2	-0.0455157	0.549291	0.0901674	712.855
48.4	-0.0457795	0.547635	0.0907642	714.78
48.6	-0.0460441	0.545984	0.0913596	716.128
48.8	-0.0463098	0.544335	0.0919537	718.039
49	-0.0465766	0.54269	0.0925462	719.37
49.2	-0.0468447	0.541046	0.0931369	721.267
49.4	-0.0471142	0.539404	0.0937258	722.582
49.6	-0.0473851	0.537764	0.0943126	724.463
49.8	-0.0476576	0.536123	0.0948972	725.762
50	-0.0479318	0.534484	0.0954794	727.627
50.2	-0.0482077	0.532844	0.0960593	728.911
50.4	-0.0484856	0.531204	0.0966365	730.76
50.6	-0.0487653	0.529563	0.0972111	732.029
50.8	-0.0490471	0.527922	0.0977828	733.861
51	-0.0493309	0.526281	0.0983517	735.116
51.2	-0.0496169	0.524639	0.0989177	736.932
51.4	-0.049905	0.522997	0.0994807	738.172
51.6	-0.0501953	0.521355	0.100041	739.973
51.8	-0.0504877	0.519713	0.100598	741.198
52	-0.0507822	0.518072	0.101152	742.985
52.2	-0.0510788	0.516433	0.101703	744.195
52.4	-0.0513773	0.514796	0.102251	745.968
52.6	-0.0516778	0.513162	0.102797	747.163
52.8	-0.05198	0.511532	0.10334	748.922
53	-0.0522837	0.509908	0.103881	750.102
53.2	-0.0525889	0.50829	0.10442	751.847
53.4	-0.0528951	0.50668	0.104958	753.012
53.6	-0.0532023	0.505079	0.105494	754.743
53.8	-0.0535101	0.503488	0.10603	755.892
54	-0.0538182	0.501909	0.106565	757.609
54.2	-0.0541263	0.500343	0.1071	758.744
54.4	-0.0544341	0.498791	0.107636	760.446
54.6	-0.0547414	0.497254	0.108173	761.567
54.8	-0.0550478	0.495733	0.108712	763.254
55	-0.0553532	0.494227	0.109254	764.361
55.2	-0.0556572	0.492738	0.109798	766.033
55.4	-0.0559598	0.491266	0.110346	767.127
55.6	-0.0562608	0.489808	0.110897	768.785
55.8	-0.0565602	0.488366	0.111451	769.866
56	-0.0568581	0.486937	0.112009	771.509
56.2	-0.0571544	0.485519	0.112571	772.577
56.4	-0.0574495	0.484111	0.113136	774.207
56.6	-0.0577435	0.48271	0.113705	775.261
56.8	-0.0580369	0.481313	0.114277	776.878
57	-0.0583302	0.479916	0.114852	777.919
57.2	-0.0586238	0.478514	0.11543	779.523
57.4	-0.0589185	0.477104	0.11601	780.55
57.6	-0.0592151	0.47568	0.116591	782.142
57.8	-0.0595145	0.474235	0.117173	783.155
58	-0.0598176	0.472763	0.117755	784.735
58.2	-0.0601258	0.471256	0.118336	785.734
58.4	-0.0604404	0.469704	0.118915	787.3
58.6	-0.0607628	0.468098	0.119491	788.286
58.8	-0.061095	0.466426	0.120064	789.839
59	-0.0614389	0.464675	0.12063	790.812
59.2	-0.0617967	0.462828	0.12119	792.352
59.4	-0.0621713	0.460867	0.121741	793.312
59.6	-0.0625656	0.45877	0.122282	794.838
59.8	-0.0629832	0.456513	0.12281	795.787
60	-0.0634283	0.454064	0.123325	797.3
60.2	-0.0639059	0.451387	0.123822	798.236
60.4	-0.0644216	0.448439	0.124301	799.736
60.6	-0.0649821	0.445168	0.124759	800.661
60.8	-0.0655952	0.441516	0.125194	802.149
61	-0.0662699	0.437409	0.125602	803.061
61.2	-0.0670162	0.432767	0.125983	804.538
61.4	-0.0678458	0.427493	0.126334	805.439
61.6	-0.068772	0.421481	0.126652	806.903
61.8	-0.0698087	0.414624	0.126935	807.792
62	-0.0709663	0.40683	0.127185	809.246
62.2	-0.0722517	0.398026	0.127403	810.123
62.4	-0.0736701	0.388158	0.127591	811.566
62.6	-0.0752246	0.377188	0.127754	812.431
62.8	-0.076916	0.365101	0.127892	813.863
63	-0.0787417	0.351909	0.128009	814.716
63.2	-0.0806958	0.337651	0.128108	816.136
63.4	-0.0827681	0.322405	0.128191	816.978
63.6	-0.0849444	0.306278	0.128261	818.386
63.8	-0.0872057	0.289417	0.128318	819.216
64	-0.0895291	0.271995	0.128366	820.614
64.2	-0.091888	0.254213	0.128406	821.432
64.4	-0.094253	0.236284	0.128438	822.818
64.6	-0.0965937	0.21842	0.128465	823.626
64.8	-0.0988818	0.200818	0.128487	825
65	-0.101095	0.183645	0.128506	825.798
65.2	-0.10322	0.167022	0.128521	827.161
65.4	-0.10525	0.151037	0.128533	827.948
65.6	-0.107185	0.135757	0.128543	829.3
65.8	-0.109016	0.121262	0.128552	830.077
66	-0.110733	0.107642	0.128558	831.419
66.2	-0.112321	0.094981	0.128564	832.186
66.4	-0.11377	0.0833297	0.128569	833.518
66.6	-0.115077	0.0727111	0.128572	834.276
66.8	-0.116246	0.0631296	0.128575	835.598
67	-0.117282	0.0545755	0.128577	836.346
67.2	-0.118199	0.0470234	0.128579	837.659
67.4	-0.119008	0.0404273	0.128581	838.397
67.6	-0.119707	0.0347206	0.128582	839.701
67.8	-0.120298	0.0298225	0.128583	840.429
68	-0.120785	0.0256459	0.128584	841.724
68.2	-0.121176	0.022103	0.128584	842.443
68.4	-0.121485	0.0191082	0.128585	843.729
68.6	-0.121724	0.0165813	0.128585	844.438
68.8	-0.121908	0.0144498	0.128586	845.715
69	-0.122049	0.0126492	0.128586	846.415
69.2	-0.122156	0.0111238	0.128586	847.683
69.4	-0.122237	0.00982634	0.128586	848.373
69.6	-0.122299	0.0087171	0.128586	849.632
69.8	-0.122347	0.0077633	0.128587	850.313
70	-0.122384	0.00693806	0.128587	851.563
70.2	-0.122413	0.00621949	0.128587	852.235
70.4	-0.122435	0.00558989	0.128587	853.476
70.6	-0.122453	0.00503498	0.128587	854.14
70.8	-0.122468	0.00454331	0.128587	855.372
71	-0.122479	0.00410568	0.128587	856.028
71.2	-0.122488	0.00371473	0.128587	857.251
71.4	-0.122495	0.00336452	0.128587	857.899
71.6	-0.122501	0.00305026	0.128587	859.114
71.8	-0.122506	0.002768	0.128587	859.754
72	-0.12251	0.00251444	0.128587	860.961
72.2	-0.122514	0.00228676	0.128587	861.595
72.4	-0.122517	0.00208245	0.128587	862.794
72.6	-0.122519	0.00189924	0.128587	863.42
72.8	-0.122521	0.00173503	0.128587	864.613
73	-0.122523	0.00158786	0.128587	865.232
73.2	-0.122524	0.00145586	0.128587	866.418
73.4	-0.122526	0.00133728	0.128587	867.03
73.6	-0.122526	0.00123049	0.128587	868.209
73.8	-0.122527	0.00113398	0.128587	868.814
74	-0.122528	0.0010464	0.128587	869.987
74.2	-0.122528	0.000966523	0.128587	870.586
74.4	-0.122529	0.000893286	0.128587	871.752
74.6	-0.122529	0.000825772	0.128587	872.344
74.8	-0.122529	0.00076322	0.128587	873.505
75	-0.122529	0.000705016	0.128587	874.09
75.2	-0.122529	0.000650702	0.128587	875.245
75.4	-0.12253	0.000599975	0.128587	875.824
75.6	-0.12253	0.000552696	0.128587	876.972
75.8	-0.12253	0.000508901	0.128587	877.545
76	-0.12253	0.000468819	0.128587	878.687
76.2	-0.122529	0.00043287	0.128587	879.253
76.4	-0.122529	0.000401652	0.128587	880.389
76.6	-0.122529	0.000375869	0.128587	880.95
76.8	-0.122529	0.000356196	0.128587	882.08
77	-0.122529	0.000343088	0.128587	882.637
77.2	-0.122529	0.000336544	0.128587	883.765
77.4	-0.122529	0.000335936	0.128587	884.322
77.6	-0.122528	0.000339951	0.128587	885.45
77.8	-0.122528	0.000346774	0.128587	886.008
78	-0.122528	0.000354459	0.128587	887.138
78.2	-0.122528	0.000361351	0.128587	887.697
78.4	-0.122527	0.000367948	0.128587	888.826
78.6	-0.122527	0.000369213	0.128587	889.387
78.8	-0.122527	0.000363719	0.128587	890.517
79	-0.122526	0.000348445	0.128587	891.079
