# Supplementary material for: Gas transport in firn: multiple-tracer characterisation and model intercomparison for NEEM, Northern Greenland
Source: Copernicus journal article supplement (doi:10.5194/acp-12-4259-2012), 2012-05-14
Supplement: Supplementary file 12 [file NEEM08_US_CSIRO.xls]

## Sheet: Diffusivity
depth	Molec_diff	Eddy_diff
0	1.12662e-05	1.33612e-05
0.2	1.12658e-05	1.26754e-05
0.4	1.12655e-05	1.19895e-05
0.6	1.12651e-05	1.13222e-05
0.8	1.12641e-05	1.07344e-05
1	1.1263e-05	1.01465e-05
1.2	1.12617e-05	9.59476e-06
1.4	1.12599e-05	9.0893e-06
1.6	1.12581e-05	8.58383e-06
1.8	1.12556e-05	8.13002e-06
2	1.12529e-05	7.69411e-06
2.2	1.12502e-05	7.26401e-06
2.4	1.12465e-05	6.88703e-06
2.6	1.12429e-05	6.51006e-06
2.8	1.12388e-05	6.15831e-06
3	1.12341e-05	5.83143e-06
3.2	1.12295e-05	5.50456e-06
3.4	1.12238e-05	5.21848e-06
3.6	1.12181e-05	4.93434e-06
3.8	1.12118e-05	4.66665e-06
4	1.1205e-05	4.41906e-06
4.2	1.11981e-05	4.17147e-06
4.4	1.119e-05	3.95485e-06
4.6	1.11819e-05	3.73862e-06
4.8	1.11731e-05	3.53762e-06
5	1.11638e-05	3.34838e-06
5.2	1.11542e-05	3.16331e-06
5.4	1.11435e-05	2.99734e-06
5.6	1.11328e-05	2.83138e-06
5.8	1.1121e-05	2.68212e-06
6	1.1109e-05	2.53628e-06
6.2	1.10962e-05	2.39943e-06
6.4	1.10828e-05	2.27104e-06
6.6	1.1069e-05	2.1462e-06
6.8	1.10541e-05	2.03296e-06
7	1.10392e-05	1.91973e-06
7.2	1.10228e-05	1.81948e-06
7.4	1.10065e-05	1.71944e-06
7.6	1.09889e-05	1.6282e-06
7.8	1.09711e-05	1.53968e-06
8	1.09523e-05	1.45692e-06
8.2	1.09329e-05	1.37846e-06
8.4	1.09128e-05	1.30361e-06
8.6	1.08919e-05	1.23397e-06
8.8	1.08705e-05	1.16644e-06
9	1.0848e-05	1.10454e-06
9.2	1.08252e-05	1.04373e-06
9.4	1.08011e-05	9.88625e-07
9.6	1.0777e-05	9.33973e-07
9.8	1.07514e-05	8.84853e-07
10	1.07258e-05	8.35803e-07
10.2	1.06986e-05	7.91964e-07
10.4	1.06715e-05	7.48124e-07
10.6	1.0643e-05	7.08824e-07
10.8	1.06144e-05	6.69649e-07
11	1.05845e-05	6.34415e-07
11.2	1.05545e-05	5.99367e-07
11.4	1.05232e-05	5.6782e-07
11.6	1.04919e-05	5.36428e-07
11.8	1.04593e-05	5.08217e-07
12	1.04268e-05	4.80135e-07
12.2	1.03931e-05	4.54869e-07
12.4	1.03593e-05	4.29817e-07
12.6	1.03247e-05	4.07116e-07
12.8	1.029e-05	3.84784e-07
13	1.02546e-05	3.64367e-07
13.2	1.02191e-05	3.44474e-07
13.4	1.01832e-05	3.26095e-07
13.6	1.01473e-05	3.08386e-07
13.8	1.01111e-05	2.91828e-07
14	1.00751e-05	2.76074e-07
14.2	1.00391e-05	2.61144e-07
14.4	1.00035e-05	2.47138e-07
14.6	9.96799e-06	2.33666e-07
14.8	9.93332e-06	2.21222e-07
15	9.89886e-06	2.09057e-07
15.2	9.86589e-06	1.98009e-07
15.4	9.83328e-06	1.87154e-07
15.6	9.8026e-06	1.77215e-07
15.8	9.7728e-06	1.67577e-07
16	9.74492e-06	1.58586e-07
16.2	9.71733e-06	1.50034e-07
16.4	9.69001e-06	1.41896e-07
16.6	9.66236e-06	1.34312e-07
16.8	9.63459e-06	1.26944e-07
17	9.60639e-06	1.20222e-07
17.2	9.57809e-06	1.13642e-07
17.4	9.5494e-06	1.07594e-07
17.6	9.52055e-06	1.01759e-07
17.8	9.49141e-06	9.62755e-08
18	9.46201e-06	9.11051e-08
18.2	9.43243e-06	8.61317e-08
18.4	9.40247e-06	8.15528e-08
18.6	9.3724e-06	7.70843e-08
18.8	9.34194e-06	7.29881e-08
19	9.31131e-06	6.90286e-08
19.2	9.28041e-06	6.5309e-08
19.4	9.24924e-06	6.1803e-08
19.6	9.21791e-06	5.8424e-08
19.8	9.18618e-06	5.53218e-08
20	9.15434e-06	5.23001e-08
20.2	9.12215e-06	4.95086e-08
20.4	9.08976e-06	4.68332e-08
20.6	9.05714e-06	4.42945e-08
20.8	9.02421e-06	4.19277e-08
21	8.99115e-06	3.9628e-08
21.2	8.95769e-06	3.7526e-08
21.4	8.92409e-06	3.54903e-08
21.6	8.89021e-06	3.35765e-08
21.8	8.85607e-06	3.17759e-08
22	8.82178e-06	3.0033e-08
22.2	8.7871e-06	2.84419e-08
22.4	8.75228e-06	2.68964e-08
22.6	8.71719e-06	2.54493e-08
22.8	8.68183e-06	2.40827e-08
23	8.64633e-06	2.27635e-08
23.2	8.61045e-06	2.15562e-08
23.4	8.57443e-06	2.03853e-08
23.6	8.53814e-06	1.92878e-08
23.8	8.50159e-06	1.82528e-08
24	8.46491e-06	1.72515e-08
24.2	8.42784e-06	1.63372e-08
24.4	8.39063e-06	1.54516e-08
24.6	8.35317e-06	1.46168e-08
24.8	8.31544e-06	1.38344e-08
25	8.27757e-06	1.30779e-08
25.2	8.23936e-06	1.23813e-08
25.4	8.20097e-06	1.17125e-08
25.6	8.16238e-06	1.10758e-08
25.8	8.12348e-06	1.04853e-08
26	8.08444e-06	9.91467e-09
26.2	8.04512e-06	9.38237e-09
26.4	8.00557e-06	8.87821e-09
26.6	7.96587e-06	8.3919e-09
26.8	7.92583e-06	7.94639e-09
27	7.88563e-06	7.51652e-09
27.2	7.84523e-06	7.10876e-09
27.4	7.80454e-06	6.72924e-09
27.6	7.7637e-06	6.36316e-09
27.8	7.7226e-06	6.02131e-09
28	7.68127e-06	5.69796e-09
28.2	7.6398e-06	5.38649e-09
28.4	7.59801e-06	5.0996e-09
28.6	7.55606e-06	4.82439e-09
28.8	7.51393e-06	4.56146e-09
29	7.4715e-06	4.31859e-09
29.2	7.42892e-06	4.08457e-09
29.4	7.38613e-06	3.86356e-09
29.6	7.34308e-06	3.65698e-09
29.8	7.29988e-06	3.45813e-09
30	7.25644e-06	3.27217e-09
30.2	7.21278e-06	3.09659e-09
30.4	7.16898e-06	2.92776e-09
30.6	7.1249e-06	2.77114e-09
30.8	7.08064e-06	2.62202e-09
31	7.03623e-06	2.47876e-09
31.2	6.99153e-06	2.34672e-09
31.4	6.94668e-06	2.22016e-09
31.6	6.90167e-06	2.09889e-09
31.8	6.85637e-06	1.98725e-09
32	6.81093e-06	1.87989e-09
32.2	6.76533e-06	1.77752e-09
32.4	6.71945e-06	1.6828e-09
32.6	6.67343e-06	1.59179e-09
32.8	6.62724e-06	1.50529e-09
33	6.5808e-06	1.42498e-09
33.2	6.53421e-06	1.34786e-09
33.4	6.48745e-06	1.2747e-09
33.6	6.44045e-06	1.20665e-09
33.8	6.39331e-06	1.14133e-09
34	6.34599e-06	1.07941e-09
34.2	6.29844e-06	1.02177e-09
34.4	6.25076e-06	9.66467e-10
34.6	6.20293e-06	9.14008e-10
34.8	6.15489e-06	8.6521e-10
35	6.10675e-06	8.18406e-10
35.2	6.05848e-06	7.73929e-10
35.4	6.01004e-06	7.32633e-10
35.6	5.96151e-06	6.93037e-10
35.8	5.91289e-06	6.55297e-10
36	5.86413e-06	6.20365e-10
36.2	5.8153e-06	5.86878e-10
36.4	5.76641e-06	5.54833e-10
36.6	5.71741e-06	5.25291e-10
36.8	5.66837e-06	4.9698e-10
37	5.61927e-06	4.69892e-10
37.2	5.57012e-06	4.44777e-10
37.4	5.52093e-06	4.20851e-10
37.6	5.47171e-06	3.97959e-10
37.8	5.42247e-06	3.76591e-10
38	5.37321e-06	3.56377e-10
38.2	5.32394e-06	3.37038e-10
38.4	5.27467e-06	3.18844e-10
38.6	5.22541e-06	3.01772e-10
38.8	5.17617e-06	2.85438e-10
39	5.12694e-06	2.69937e-10
39.2	5.07775e-06	2.55523e-10
39.4	5.02859e-06	2.41732e-10
39.6	4.97947e-06	2.28557e-10
39.8	4.93041e-06	2.1635e-10
40	4.88141e-06	2.0471e-10
40.2	4.83245e-06	1.93588e-10
40.4	4.78358e-06	1.8317e-10
40.6	4.73478e-06	1.73348e-10
40.8	4.68606e-06	1.63962e-10
41	4.63742e-06	1.55064e-10
41.2	4.5889e-06	1.4678e-10
41.4	4.54047e-06	1.38862e-10
41.6	4.49212e-06	1.31303e-10
41.8	4.44392e-06	1.24272e-10
42	4.39583e-06	1.17594e-10
42.2	4.34784e-06	1.11218e-10
42.4	4.29999e-06	1.05203e-10
42.6	4.2523e-06	9.95735e-11
42.8	4.20472e-06	9.41972e-11
43	4.15727e-06	8.90687e-11
43.2	4.11002e-06	8.43043e-11
43.4	4.06291e-06	7.97722e-11
43.6	4.01593e-06	7.54479e-11
43.8	3.96912e-06	7.13661e-11
44	3.92252e-06	6.75472e-11
44.2	3.87607e-06	6.39022e-11
44.4	3.82977e-06	6.04269e-11
44.6	3.7837e-06	5.71865e-11
44.8	3.73781e-06	5.41154e-11
45	3.69209e-06	5.11862e-11
45.2	3.64654e-06	4.84061e-11
45.4	3.60126e-06	4.58196e-11
45.6	3.55616e-06	4.33517e-11
45.8	3.51123e-06	4.09994e-11
46	3.46654e-06	3.87877e-11
46.2	3.42209e-06	3.67094e-11
46.4	3.37783e-06	3.47277e-11
46.6	3.33377e-06	3.28397e-11
46.8	3.28998e-06	3.10781e-11
47	3.24642e-06	2.94092e-11
47.2	3.20307e-06	2.78188e-11
47.4	3.15992e-06	2.63043e-11
47.6	3.11706e-06	2.48995e-11
47.8	3.07431e-06	2.35602e-11
48	3.03165e-06	2.22845e-11
48.2	2.98902e-06	2.10756e-11
48.4	2.94633e-06	1.99485e-11
48.6	2.90353e-06	1.88743e-11
48.8	2.86058e-06	1.78514e-11
49	2.81741e-06	1.68855e-11
49.2	2.77387e-06	1.59816e-11
49.4	2.73e-06	1.51204e-11
49.6	2.68577e-06	1.43005e-11
49.8	2.64104e-06	1.35279e-11
50	2.59569e-06	1.28033e-11
50.2	2.5498e-06	1.21131e-11
50.4	2.50334e-06	1.14563e-11
50.6	2.45614e-06	1.08376e-11
50.8	2.40807e-06	1.02569e-11
51	2.35926e-06	9.70404e-12
51.2	2.30969e-06	9.17795e-12
51.4	2.25916e-06	8.68205e-12
51.6	2.2075e-06	8.21694e-12
51.8	2.15492e-06	7.77415e-12
52	2.1014e-06	7.35291e-12
52.2	2.04674e-06	6.955e-12
52.4	1.99069e-06	6.58258e-12
52.6	1.93354e-06	6.22809e-12
52.8	1.87526e-06	5.89089e-12
53	1.81575e-06	5.5713e-12
53.2	1.75453e-06	5.2732e-12
53.4	1.69204e-06	4.98948e-12
53.6	1.62825e-06	4.71963e-12
53.8	1.56314e-06	4.46312e-12
54	1.49631e-06	4.22415e-12
54.2	1.42871e-06	3.99715e-12
54.4	1.36066e-06	3.78125e-12
54.6	1.29244e-06	3.57604e-12
54.8	1.22452e-06	3.38367e-12
55	1.15745e-06	3.2021e-12
55.2	1.09144e-06	3.02941e-12
55.4	1.02676e-06	2.86527e-12
55.6	9.63973e-07	2.71028e-12
55.8	9.0394e-07	2.56508e-12
56	8.46432e-07	2.427e-12
56.2	7.91717e-07	2.29574e-12
56.4	7.40061e-07	2.17104e-12
56.6	6.93146e-07	2.05468e-12
56.8	6.5033e-07	1.94429e-12
57	6.11584e-07	1.83936e-12
57.2	5.76918e-07	1.73966e-12
57.4	5.46691e-07	1.64572e-12
57.6	5.20674e-07	1.55749e-12
57.8	4.97705e-07	1.47363e-12
58	4.77537e-07	1.39394e-12
58.2	4.5992e-07	1.31825e-12
58.4	4.45172e-07	1.24754e-12
58.6	4.32289e-07	1.18053e-12
58.8	4.20894e-07	1.11685e-12
59	4.10741e-07	1.05636e-12
59.2	4.01628e-07	9.99162e-13
59.4	3.93248e-07	9.45632e-13
59.6	3.85072e-07	8.94759e-13
59.8	3.76852e-07	8.46433e-13
60	3.68341e-07	8.00546e-13
60.2	3.59103e-07	7.57383e-13
60.4	3.48676e-07	7.16753e-13
60.6	3.36919e-07	6.78152e-13
60.8	3.23577e-07	6.41494e-13
61	3.08391e-07	6.06694e-13
61.2	2.90447e-07	5.74079e-13
61.4	2.6963e-07	5.43256e-13
61.6	2.45896e-07	5.13979e-13
61.8	2.1897e-07	4.86182e-13
62	1.88575e-07	4.59799e-13
62.2	1.53192e-07	4.35122e-13
62.4	1.13263e-07	4.11748e-13
62.6	7.08403e-08	3.89551e-13
62.8	3.17931e-08	3.6848e-13
63	4.93051e-09	3.48484e-13
63.2	8.87176e-10	3.2979e-13
63.4	0	3.12071e-13
63.6	0	2.95248e-13
63.8	0	2.7928e-13
64	0	2.64129e-13
64.2	0	2.49949e-13
64.4	0	2.36522e-13
64.6	0	2.23775e-13
64.8	0	2.11677e-13
65	0	2.002e-13
65.2	0	1.89432e-13
65.4	0	1.7926e-13
65.6	0	1.69604e-13
65.8	0	1.60441e-13
66	0	1.51748e-13
66.2	0	1.43562e-13
66.4	0	1.35858e-13
66.6	0	1.28546e-13
66.8	0	1.21607e-13
67	0	1.15025e-13
67.2	0	1.08794e-13
67.4	0	1.02961e-13
67.6	0	9.74251e-14
67.8	0	9.21718e-14
68	0	8.71885e-14
68.2	0	8.24623e-14
68.4	0	7.80264e-14
68.6	0	7.3836e-14
68.8	0	6.98598e-14
69	0	6.60878e-14
69.2	0	6.25105e-14
69.4	0	5.91263e-14
69.6	0	5.59554e-14
69.8	0	5.29465e-14
70	0	5.00921e-14
70.2	0	4.73849e-14
70.4	0	4.4818e-14
70.6	0	4.24018e-14
70.8	0	4.01254e-14
71	0	3.79658e-14
71.2	0	3.59176e-14
71.4	0	3.39753e-14
71.6	0	3.2134e-14
71.8	0	3.04062e-14
72	0	2.87728e-14
72.2	0	2.72234e-14
72.4	0	2.57541e-14
72.6	0	2.4361e-14
72.8	0	2.30405e-14
73	0	2.18034e-14
73.2	0	2.06317e-14
73.4	0	1.95204e-14
73.6	0	1.84668e-14
73.8	0	1.74679e-14
74	0	1.65211e-14
74.2	0	1.5634e-14
74.4	0	1.47938e-14
74.6	0	1.3997e-14
74.8	0	1.32416e-14
75	0	1.25255e-14
75.2	0	1.18469e-14
75.4	0	1.121e-14
75.6	0	1.06076e-14
75.8	0	1.00365e-14
76	0	9.49502e-15
76.2	0	8.98178e-15
76.4	0	8.49539e-15
76.6	0	8.03752e-15
76.8	0	7.60583e-15
77	0	7.19652e-15
77.2	0	6.8085e-15
77.4	0	6.44072e-15
77.6	0	6.09218e-15
77.8	0	5.76263e-15
78	0	5.45332e-15
78.2	0	5.16006e-15
78.4	0	4.88205e-15
78.6	0	4.61855e-15
78.8	0	4.36885e-15
79	0	4.13225e-15
79.2	0	3.90981e-15
79.4	0	3.69974e-15
79.6	0	3.5006e-15
79.8	0	3.31185e-15
80	0	3.13298e-15
80.2	0	2.96349e-15
80.4	0	2.803e-15
80.6	0	2.65256e-15
80.8	0	2.50994e-15
81	0	2.37476e-15
81.2	0	2.24665e-15
81.4	0	2.12527e-15
81.6	0	2.01026e-15
81.8	0	1.90163e-15
82	0	1.79951e-15
82.2	0	1.70272e-15
82.4	0	1.61099e-15
82.6	0	1.52407e-15
82.8	0	1.44171e-15
83	0	1.36369e-15
83.2	0	1.29006e-15
83.4	0	1.22077e-15
83.6	0	1.1551e-15
83.8	0	1.09286e-15
84	0	1.03389e-15
84.2	0	9.78029e-16
84.4	0	9.25109e-16
84.6	0	8.75133e-16
84.8	0	8.2813e-16

## Sheet: profiles
depth	CO2	CH4	SF6	15N
0	382.39	1837.16	6.647	1
0.2	382.52	1837.46	6.64468	1
0.4	382.65	1837.76	6.64237	1
0.6	382.782	1838.08	6.63972	1
0.8	382.913	1838.39	6.63702	1
1	383.044	1838.7	6.63431	1
1.2	383.175	1839.02	6.63152	1
1.4	383.306	1839.34	6.62857	1
1.6	383.437	1839.66	6.62561	1
1.8	383.566	1839.98	6.6225	1
2	383.694	1840.3	6.61929	1.00001
2.2	383.823	1840.63	6.61608	1.00001
2.4	383.948	1840.95	6.61263	1.00001
2.6	384.074	1841.27	6.60917	1.00001
2.8	384.198	1841.59	6.60561	1.00001
3	384.319	1841.92	6.60191	1.00001
3.2	384.44	1842.24	6.59821	1.00001
3.4	384.557	1842.56	6.5943	1.00001
3.6	384.674	1842.88	6.59036	1.00001
3.8	384.788	1843.2	6.58634	1.00001
4	384.899	1843.51	6.58217	1.00001
4.2	385.009	1843.83	6.57799	1.00001
4.4	385.114	1844.14	6.57363	1.00001
4.6	385.219	1844.45	6.56923	1.00001
4.8	385.32	1844.76	6.56474	1.00002
5	385.418	1845.07	6.56014	1.00002
5.2	385.515	1845.37	6.55552	1.00002
5.4	385.606	1845.67	6.55072	1.00002
5.6	385.697	1845.96	6.54592	1.00002
5.8	385.782	1846.26	6.54098	1.00002
6	385.866	1846.55	6.53599	1.00002
6.2	385.946	1846.83	6.53092	1.00002
6.4	386.022	1847.11	6.52576	1.00002
6.6	386.098	1847.39	6.52057	1.00002
6.8	386.167	1847.66	6.51524	1.00002
7	386.236	1847.94	6.50991	1.00002
7.2	386.298	1848.2	6.50444	1.00002
7.4	386.36	1848.46	6.49896	1.00003
7.6	386.416	1848.72	6.49338	1.00003
7.8	386.471	1848.97	6.48775	1.00003
8	386.522	1849.22	6.48206	1.00003
8.2	386.569	1849.47	6.4763	1.00003
8.4	386.615	1849.71	6.4705	1.00003
8.6	386.655	1849.94	6.46461	1.00003
8.8	386.695	1850.17	6.4587	1.00003
9	386.729	1850.4	6.4527	1.00003
9.2	386.762	1850.62	6.44669	1.00003
9.4	386.79	1850.84	6.44058	1.00003
9.6	386.817	1851.05	6.43447	1.00004
9.8	386.839	1851.26	6.42826	1.00004
10	386.86	1851.46	6.42204	1.00004
10.2	386.876	1851.66	6.41574	1.00004
10.4	386.892	1851.85	6.40943	1.00004
10.6	386.902	1852.04	6.40304	1.00004
10.8	386.912	1852.23	6.39664	1.00004
11	386.917	1852.41	6.39017	1.00004
11.2	386.921	1852.58	6.38368	1.00004
11.4	386.921	1852.75	6.37713	1.00004
11.6	386.921	1852.92	6.37056	1.00004
11.8	386.916	1853.08	6.36393	1.00004
12	386.91	1853.24	6.35728	1.00005
12.2	386.9	1853.39	6.35057	1.00005
12.4	386.89	1853.54	6.34386	1.00005
12.6	386.875	1853.69	6.33707	1.00005
12.8	386.861	1853.83	6.33028	1.00005
13	386.842	1853.96	6.32343	1.00005
13.2	386.822	1854.1	6.31657	1.00005
13.4	386.8	1854.22	6.30966	1.00005
13.6	386.776	1854.35	6.30274	1.00005
13.8	386.75	1854.46	6.29577	1.00005
14	386.722	1854.58	6.28879	1.00006
14.2	386.692	1854.69	6.28177	1.00006
14.4	386.66	1854.8	6.27473	1.00006
14.6	386.627	1854.9	6.26766	1.00006
14.8	386.592	1855	6.26057	1.00006
15	386.556	1855.09	6.25347	1.00006
15.2	386.517	1855.18	6.24635	1.00006
15.4	386.478	1855.27	6.23921	1.00006
15.6	386.436	1855.35	6.23206	1.00006
15.8	386.394	1855.43	6.22491	1.00006
16	386.35	1855.5	6.21774	1.00006
16.2	386.305	1855.57	6.21058	1.00007
16.4	386.259	1855.64	6.20342	1.00007
16.6	386.212	1855.7	6.19625	1.00007
16.8	386.164	1855.77	6.18909	1.00007
17	386.114	1855.82	6.18192	1.00007
17.2	386.065	1855.87	6.17476	1.00007
17.4	386.013	1855.92	6.1676	1.00007
17.6	385.961	1855.97	6.16044	1.00007
17.8	385.908	1856.01	6.15328	1.00007
18	385.855	1856.05	6.14613	1.00007
18.2	385.8	1856.09	6.13897	1.00007
18.4	385.745	1856.12	6.13182	1.00008
18.6	385.69	1856.15	6.12467	1.00008
18.8	385.633	1856.17	6.11753	1.00008
19	385.576	1856.2	6.11038	1.00008
19.2	385.518	1856.22	6.10324	1.00008
19.4	385.46	1856.24	6.09611	1.00008
19.6	385.402	1856.25	6.08897	1.00008
19.8	385.343	1856.26	6.08184	1.00008
20	385.283	1856.27	6.07471	1.00008
20.2	385.223	1856.28	6.06759	1.00008
20.4	385.163	1856.28	6.06046	1.00008
20.6	385.102	1856.29	6.05334	1.00009
20.8	385.042	1856.28	6.04623	1.00009
21	384.98	1856.28	6.03911	1.00009
21.2	384.919	1856.28	6.032	1.00009
21.4	384.857	1856.27	6.0249	1.00009
21.6	384.795	1856.26	6.01779	1.00009
21.8	384.733	1856.25	6.01069	1.00009
22	384.671	1856.23	6.00359	1.00009
22.2	384.608	1856.22	5.9965	1.00009
22.4	384.546	1856.2	5.9894	1.00009
22.6	384.483	1856.18	5.98231	1.0001
22.8	384.42	1856.15	5.97522	1.0001
23	384.357	1856.13	5.96814	1.0001
23.2	384.294	1856.1	5.96105	1.0001
23.4	384.232	1856.08	5.95397	1.0001
23.6	384.169	1856.05	5.94689	1.0001
23.8	384.106	1856.01	5.93982	1.0001
24	384.043	1855.98	5.93274	1.0001
24.2	383.98	1855.95	5.92567	1.0001
24.4	383.917	1855.91	5.91859	1.0001
24.6	383.854	1855.87	5.91152	1.0001
24.8	383.791	1855.83	5.90445	1.00011
25	383.729	1855.79	5.89738	1.00011
25.2	383.666	1855.75	5.89032	1.00011
25.4	383.604	1855.71	5.88325	1.00011
25.6	383.542	1855.66	5.87618	1.00011
25.8	383.479	1855.61	5.86912	1.00011
26	383.417	1855.57	5.86205	1.00011
26.2	383.355	1855.52	5.85499	1.00011
26.4	383.294	1855.47	5.84792	1.00011
26.6	383.232	1855.42	5.84085	1.00011
26.8	383.171	1855.36	5.83379	1.00012
27	383.109	1855.31	5.82672	1.00012
27.2	383.048	1855.26	5.81965	1.00012
27.4	382.988	1855.2	5.81258	1.00012
27.6	382.927	1855.14	5.80551	1.00012
27.8	382.867	1855.09	5.79844	1.00012
28	382.806	1855.03	5.79136	1.00012
28.2	382.746	1854.97	5.78429	1.00012
28.4	382.687	1854.91	5.77721	1.00012
28.6	382.627	1854.85	5.77013	1.00012
28.8	382.568	1854.78	5.76305	1.00012
29	382.509	1854.72	5.75596	1.00013
29.2	382.45	1854.66	5.74888	1.00013
29.4	382.392	1854.59	5.74178	1.00013
29.6	382.333	1854.53	5.73469	1.00013
29.8	382.275	1854.46	5.72759	1.00013
30	382.218	1854.39	5.72049	1.00013
30.2	382.16	1854.33	5.71338	1.00013
30.4	382.103	1854.26	5.70627	1.00013
30.6	382.046	1854.19	5.69915	1.00013
30.8	381.989	1854.12	5.69203	1.00013
31	381.933	1854.05	5.68491	1.00013
31.2	381.876	1853.98	5.67778	1.00014
31.4	381.821	1853.91	5.67064	1.00014
31.6	381.765	1853.84	5.6635	1.00014
31.8	381.709	1853.77	5.65635	1.00014
32	381.654	1853.7	5.64919	1.00014
32.2	381.599	1853.63	5.64203	1.00014
32.4	381.545	1853.55	5.63486	1.00014
32.6	381.491	1853.48	5.62768	1.00014
32.8	381.436	1853.41	5.6205	1.00014
33	381.383	1853.33	5.61331	1.00014
33.2	381.329	1853.26	5.60611	1.00015
33.4	381.276	1853.19	5.5989	1.00015
33.6	381.223	1853.11	5.59168	1.00015
33.8	381.17	1853.04	5.58445	1.00015
34	381.117	1852.96	5.57722	1.00015
34.2	381.065	1852.89	5.56997	1.00015
34.4	381.013	1852.81	5.56271	1.00015
34.6	380.961	1852.74	5.55545	1.00015
34.8	380.91	1852.66	5.54817	1.00015
35	380.859	1852.59	5.54088	1.00015
35.2	380.807	1852.51	5.53358	1.00015
35.4	380.757	1852.44	5.52626	1.00016
35.6	380.706	1852.36	5.51894	1.00016
35.8	380.656	1852.28	5.5116	1.00016
36	380.605	1852.21	5.50425	1.00016
36.2	380.555	1852.13	5.49689	1.00016
36.4	380.506	1852.06	5.48951	1.00016
36.6	380.456	1851.98	5.48212	1.00016
36.8	380.407	1851.9	5.47472	1.00016
37	380.358	1851.83	5.4673	1.00016
37.2	380.309	1851.75	5.45987	1.00016
37.4	380.26	1851.68	5.45242	1.00017
37.6	380.211	1851.6	5.44496	1.00017
37.8	380.163	1851.53	5.43748	1.00017
38	380.115	1851.45	5.42999	1.00017
38.2	380.067	1851.37	5.42248	1.00017
38.4	380.019	1851.3	5.41496	1.00017
38.6	379.971	1851.22	5.40741	1.00017
38.8	379.923	1851.15	5.39986	1.00017
39	379.876	1851.08	5.39228	1.00017
39.2	379.829	1851	5.38469	1.00017
39.4	379.781	1850.93	5.37708	1.00017
39.6	379.734	1850.85	5.36946	1.00018
39.8	379.688	1850.78	5.36181	1.00018
40	379.641	1850.71	5.35415	1.00018
40.2	379.594	1850.63	5.34647	1.00018
40.4	379.548	1850.56	5.33878	1.00018
40.6	379.501	1850.49	5.33106	1.00018
40.8	379.455	1850.41	5.32332	1.00018
41	379.409	1850.34	5.31557	1.00018
41.2	379.362	1850.27	5.3078	1.00018
41.4	379.316	1850.2	5.30001	1.00018
41.6	379.27	1850.13	5.2922	1.00019
41.8	379.224	1850.06	5.28437	1.00019
42	379.179	1849.99	5.27652	1.00019
42.2	379.133	1849.92	5.26865	1.00019
42.4	379.087	1849.85	5.26076	1.00019
42.6	379.041	1849.78	5.25285	1.00019
42.8	378.996	1849.71	5.24492	1.00019
43	378.95	1849.64	5.23698	1.00019
43.2	378.905	1849.57	5.22901	1.00019
43.4	378.859	1849.51	5.22102	1.00019
43.6	378.813	1849.44	5.21301	1.00019
43.8	378.768	1849.37	5.20499	1.0002
44	378.722	1849.31	5.19694	1.0002
44.2	378.677	1849.24	5.18887	1.0002
44.4	378.631	1849.18	5.18078	1.0002
44.6	378.586	1849.11	5.17267	1.0002
44.8	378.54	1849.05	5.16454	1.0002
45	378.495	1848.99	5.15639	1.0002
45.2	378.449	1848.92	5.14823	1.0002
45.4	378.403	1848.86	5.14004	1.0002
45.6	378.358	1848.8	5.13183	1.0002
45.8	378.312	1848.74	5.1236	1.0002
46	378.266	1848.68	5.11536	1.00021
46.2	378.22	1848.61	5.10709	1.00021
46.4	378.175	1848.55	5.09881	1.00021
46.6	378.129	1848.5	5.09051	1.00021
46.8	378.083	1848.44	5.08218	1.00021
47	378.037	1848.38	5.07384	1.00021
47.2	377.99	1848.32	5.06549	1.00021
47.4	377.944	1848.26	5.05711	1.00021
47.6	377.898	1848.21	5.04872	1.00021
47.8	377.852	1848.15	5.04031	1.00021
48	377.805	1848.1	5.03189	1.00022
48.2	377.759	1848.04	5.02344	1.00022
48.4	377.712	1847.99	5.01498	1.00022
48.6	377.665	1847.93	5.00651	1.00022
48.8	377.618	1847.88	4.99801	1.00022
49	377.571	1847.83	4.9895	1.00022
49.2	377.524	1847.78	4.98096	1.00022
49.4	377.477	1847.72	4.97241	1.00022
49.6	377.429	1847.67	4.96383	1.00022
49.8	377.382	1847.62	4.95523	1.00022
50	377.334	1847.57	4.94659	1.00022
50.2	377.286	1847.52	4.93793	1.00023
50.4	377.237	1847.48	4.92924	1.00023
50.6	377.189	1847.43	4.92051	1.00023
50.8	377.14	1847.38	4.91174	1.00023
51	377.091	1847.33	4.90292	1.00023
51.2	377.041	1847.28	4.89407	1.00023
51.4	376.991	1847.24	4.88515	1.00023
51.6	376.941	1847.19	4.87617	1.00023
51.8	376.89	1847.15	4.86713	1.00023
52	376.839	1847.1	4.85802	1.00023
52.2	376.787	1847.05	4.84883	1.00023
52.4	376.734	1847.01	4.83953	1.00024
52.6	376.681	1846.96	4.83014	1.00024
52.8	376.628	1846.92	4.82065	1.00024
53	376.573	1846.87	4.81104	1.00024
53.2	376.517	1846.83	4.80125	1.00024
53.4	376.46	1846.78	4.79132	1.00024
53.6	376.403	1846.74	4.78122	1.00024
53.8	376.344	1846.69	4.77095	1.00024
54	376.283	1846.65	4.76038	1.00024
54.2	376.221	1846.6	4.74957	1.00024
54.4	376.157	1846.55	4.7385	1.00025
54.6	376.091	1846.51	4.72715	1.00025
54.8	376.023	1846.46	4.71536	1.00025
55	375.952	1846.41	4.70319	1.00025
55.2	375.879	1846.36	4.69063	1.00025
55.4	375.804	1846.31	4.67765	1.00025
55.6	375.725	1846.26	4.66414	1.00025
55.8	375.642	1846.2	4.65002	1.00025
56	375.556	1846.15	4.63538	1.00025
56.2	375.466	1846.09	4.62019	1.00025
56.4	375.374	1846.03	4.60443	1.00025
56.6	375.276	1845.97	4.58787	1.00026
56.8	375.175	1845.91	4.57075	1.00026
57	375.07	1845.85	4.5531	1.00026
57.2	374.962	1845.79	4.53496	1.00026
57.4	374.852	1845.72	4.51629	1.00026
57.6	374.738	1845.66	4.49724	1.00026
57.8	374.624	1845.6	4.47796	1.00026
58	374.508	1845.53	4.45852	1.00026
58.2	374.392	1845.47	4.43899	1.00026
58.4	374.276	1845.4	4.41952	1.00026
58.6	374.161	1845.34	4.40021	1.00026
58.8	374.047	1845.28	4.38112	1.00027
59	373.935	1845.22	4.36233	1.00027
59.2	373.825	1845.16	4.34396	1.00027
59.4	373.719	1845.1	4.32612	1.00027
59.6	373.615	1845.05	4.30876	1.00027
59.8	373.515	1845	4.29191	1.00027
60	373.418	1844.94	4.27559	1.00027
60.2	373.325	1844.9	4.25994	1.00027
60.4	373.235	1844.85	4.24491	1.00027
60.6	373.149	1844.8	4.23041	1.00027
60.8	373.066	1844.76	4.21644	1.00027
61	372.986	1844.72	4.20298	1.00028
61.2	372.909	1844.68	4.19014	1.00028
61.4	372.835	1844.64	4.17774	1.00028
61.6	372.764	1844.61	4.16572	1.00028
61.8	372.694	1844.57	4.15403	1.00028
62	372.626	1844.53	4.1426	1.00028
62.2	372.558	1844.5	4.13128	1.00028
62.4	372.488	1844.46	4.11965	1.00028
62.6	372.41	1844.42	4.10676	1.00028
62.8	372.308	1844.37	4.0902	1.00028
63	372.154	1844.29	4.0655	1.00028
63.2	371.332	1843.75	3.96357	1.00029
63.4	370.035	1842.58	3.81315	1.00029
63.6	368.562	1840.8	3.64473	1.00029
63.8	367.092	1838.45	3.47582	1.00029
64	365.652	1835.54	3.30785	1.00029
64.2	364.285	1832.76	3.14117	1.00029
64.4	362.934	1829.88	2.97601	1.00029
64.6	361.586	1826.6	2.81289	1.00029
64.8	360.248	1822.79	2.65227	1.00029
65	358.944	1818.47	2.49466	1.00029
65.2	357.742	1814.06	2.34679	1.00029
65.4	356.72	1810.44	2.21168	1.00029
65.6	355.669	1806.37	2.0753	1.00029
65.8	354.565	1801.49	1.93716	1.00029
66	353.488	1795.94	1.80436	1.00029
66.2	352.431	1789.57	1.67801	1.00029
66.4	351.339	1782.4	1.55758	1.00029
66.6	350.176	1774.35	1.4425	1.00029
66.8	348.93	1765.3	1.33263	1.00029
67	347.606	1755.24	1.22779	1.00029
67.2	346.231	1744.31	1.12821	1.00029
67.4	344.848	1732.36	1.03416	1.00029
67.6	343.515	1719.49	0.944756	1.00029
67.8	342.253	1705.77	0.860081	1.00029
68	341.06	1691.19	0.780182	1.00029
68.2	339.91	1675.66	0.705079	1.00029
68.4	338.777	1658.88	0.635946	1.00029
68.6	337.656	1641.9	0.571554	1.00029
68.8	336.546	1625.44	0.511749	1.00029
69	335.437	1609.93	0.45652	1.00029
69.2	334.316	1595.58	0.405861	1.00029
69.4	333.171	1582.67	0.360211	1.00029
69.6	332.042	1571.14	0.319631	1.00029
69.8	330.967	1560.13	0.28305	1.00029
70	329.953	1548.95	0.250159	1.00029
70.2	328.993	1537.03	0.22064	1.00029
70.4	328.071	1524	0.194167	1.00029
70.6	327.174	1510.11	0.170845	1.00029
70.8	326.278	1496.2	0.149875	1.00029
71	325.383	1481.76	0.130841	1.00029
71.2	324.498	1466.9	0.113549	1.00029
71.4	323.642	1452.08	0.0978344	1.00029
71.6	322.834	1437.88	0.083553	1.00029
71.8	322.078	1423.61	0.0708774	1.00029
72	321.35	1408.98	0.0593736	1.00029
72.2	320.648	1394.12	0.0490088	1.00029
72.4	319.976	1379.7	0.0397817	1.00029
72.6	319.333	1366.57	0.0317079	1.00029
72.8	318.718	1355.31	0.0248452	1.00029
73	318.133	1345.74	0.0193796	1.00029
73.2	317.569	1336.56	0.0149377	1.00029
73.4	317.013	1327.07	0.0113867	1.00029
73.6	316.456	1316.95	0.00858789	1.00029
73.8	315.892	1306.33	0.00640406	1.00029
74	315.328	1295.92	0.00472089	1.00029
74.2	314.783	1286.19	0.00347711	1.00029
74.4	314.264	1276.74	0.00251987	1.00029
74.6	313.776	1267.2	0.00179938	1.00029
74.8	313.324	1257.31	0.00126586	1.00029
75	312.907	1246.9	0.000873147	1.00029
75.2	312.525	1235.85	0.000584089	1.00029
75.4	312.184	1224.51	0.000387602	1.00029
75.6	311.877	1214.48	0.000247283	1.00029
75.8	311.604	1206.23	0.00014937	1.00029
76	311.364	1199.31	8.22331e-05	1.00029
76.2	311.156	1193.02	3.76658e-05	1.00029
76.4	310.977	1187.06	1.16603e-05	1.00029
76.6	310.833	1181.6	2.85804e-06	1.00029
76.8	310.715	1176.65	4.83951e-07	1.00029
77	310.616	1172.15	2.89084e-08	1.00029
77.2	310.53	1168.01	1.55094e-10	1.00029
77.4	310.454	1164.19	3.1534e-13	1.00029
77.6	310.381	1160.68	3.54578e-16	1.00029
77.8	310.305	1157.48	2.64128e-17	1.00029
78	310.217	1154.04	5.4171e-20	1.00029
78.2	310.109	1149.86	4.17323e-23	1.00029
78.4	309.976	1145.08	2.04644e-26	1.00029
78.6	309.812	1140.11	7.28214e-30	1.00029
78.8	309.614	1135.43	2.0117e-33	1.00029
79	309.381	1131.33	4.4564e-37	1.00029
79.2	309.11	1127.43	6.43017e-38	1.00029
79.4	308.811	1123.02	2.06021e-41	1.00029
79.6	308.485	1118.05	4.11288e-45	1.00029
79.8	308.138	1112.52	6.22017e-49	1.00029
80	307.773	1106.42	7.59998e-53	1.00029

## Sheet: scenarios
depth	diag1	diag2	diag3	diag4
0	0	1	0	0
0.2	-3.72698e-05	0.998995	1.2828e-05	0.25141
0.4	-7.45396e-05	0.99799	2.5656e-05	0.502821
0.6	-0.000120921	0.996866	4.12971e-05	0.782863
0.8	-0.000168884	0.995721	5.74263e-05	1.06787
1	-0.000216846	0.994576	7.35555e-05	1.35288
1.2	-0.00026728	0.993403	9.05068e-05	1.66746
1.4	-0.000322437	0.992179	0.000109029	2.03855
1.6	-0.000377594	0.990955	0.000127552	2.40964
1.8	-0.000437585	0.989679	0.000147824	2.78546
2	-0.000500195	0.988377	0.000169043	3.16384
2.2	-0.000562849	0.987073	0.000190279	3.54227
2.4	-0.000633008	0.985696	0.000214497	3.92781
2.6	-0.000703167	0.984319	0.000238714	4.31334
2.8	-0.000776432	0.982913	0.000264301	4.70177
3	-0.00085413	0.981466	0.000291841	5.09433
3.2	-0.000931828	0.980019	0.00031938	5.48689
3.4	-0.00101595	0.978515	0.000350091	5.88541
3.6	-0.00110108	0.977003	0.000381297	6.28487
3.8	-0.00118883	0.975468	0.00041396	6.68677
4	-0.00128121	0.973895	0.000449196	7.09299
4.2	-0.00137359	0.972322	0.000484433	7.49922
4.4	-0.00147226	0.970699	0.00052364	7.91144
4.6	-0.00157164	0.96907	0.000563289	8.32432
4.8	-0.00167421	0.967417	0.000605236	8.74034
5	-0.00178029	0.965736	0.000649697	9.15977
5.2	-0.00188696	0.964052	0.000694646	9.57981
5.4	-0.00199941	0.962325	0.00074433	10.0057
5.6	-0.00211185	0.960598	0.000794014	10.4316
5.8	-0.00222879	0.958839	0.000847908	10.8622
6	-0.00234726	0.957069	0.00090324	11.2944
6.2	-0.00246818	0.955282	0.000961195	11.7293
6.4	-0.00259232	0.953473	0.00102261	12.1677
6.6	-0.00271726	0.951659	0.001085	12.6071
6.8	-0.00284672	0.949814	0.00115292	13.0517
7	-0.00297618	0.94797	0.00122084	13.4963
7.2	-0.00311014	0.946096	0.00129503	13.9463
7.4	-0.00324458	0.944219	0.0013699	14.397
7.6	-0.00338221	0.942322	0.0014498	14.8517
7.8	-0.00352131	0.940416	0.00153204	15.3083
8	-0.00366257	0.938496	0.00161812	15.7678
8.2	-0.00380603	0.936562	0.00170815	16.2302
8.4	-0.00395085	0.934621	0.00180088	16.6946
8.6	-0.00409839	0.932662	0.00189909	17.1628
8.8	-0.00424669	0.9307	0.00199896	17.6321
9	-0.00439806	0.928719	0.00210573	18.106
9.2	-0.00454974	0.926736	0.00221325	18.5804
9.4	-0.0047047	0.924733	0.00232893	19.0599
9.6	-0.00485967	0.922731	0.0024446	19.5394
9.8	-0.00501802	0.920709	0.00256947	20.0243
10	-0.00517637	0.918688	0.00269435	20.5093
10.2	-0.00533772	0.916649	0.00282811	20.9994
10.4	-0.00549927	0.914609	0.00296247	21.4897
10.6	-0.00566354	0.912554	0.00310555	21.9848
10.8	-0.00582812	0.910497	0.00324961	22.4805
11	-0.00599523	0.908426	0.00340238	22.9808
11.2	-0.00616269	0.906353	0.00355634	23.4816
11.4	-0.00633257	0.904267	0.00371914	23.987
11.6	-0.00650276	0.90218	0.00388311	24.4929
11.8	-0.00667533	0.90008	0.00405623	25.0034
12	-0.00684814	0.897978	0.0042303	25.5143
12.2	-0.00702332	0.895865	0.00441399	26.0298
12.4	-0.00719865	0.89375	0.0045983	26.5456
12.6	-0.00737633	0.891624	0.00479262	27.0661
12.8	-0.00755422	0.889497	0.00498784	27.587
13	-0.00773417	0.88736	0.00519224	28.112
13.2	-0.00791453	0.885222	0.00539849	28.6379
13.4	-0.00809663	0.883075	0.00561289	29.1674
13.6	-0.00827933	0.880926	0.00583022	29.6981
13.8	-0.00846346	0.878771	0.00605453	30.2319
14	-0.00864839	0.876613	0.00628298	30.7673
14.2	-0.0088344	0.874451	0.0065171	31.3051
14.4	-0.00902139	0.872286	0.0067567	31.8451
14.6	-0.00920913	0.870119	0.00700054	32.3867
14.8	-0.00939798	0.867949	0.00725131	32.931
15	-0.00958726	0.865779	0.00750483	33.4763
15.2	-0.00977771	0.863608	0.00776688	34.0245
15.4	-0.00996837	0.861437	0.00803065	34.5733
15.6	-0.01016	0.859268	0.00830358	35.125
15.8	-0.0103519	0.8571	0.00857897	35.6774
16	-0.0105443	0.854936	0.00886183	36.2318
16.2	-0.010737	0.852775	0.00914912	36.7874
16.4	-0.01093	0.850618	0.00944194	37.3444
16.6	-0.0111232	0.848466	0.00974111	37.903
16.8	-0.0113167	0.846317	0.0100437	38.4625
17	-0.0115105	0.844175	0.0103545	39.024
17.2	-0.0117044	0.842034	0.0106673	39.5861
17.4	-0.0118986	0.839901	0.0109885	40.1504
17.6	-0.012093	0.837771	0.0113124	40.7155
17.8	-0.0122876	0.835646	0.0116424	41.2822
18	-0.0124824	0.833525	0.011977	41.8502
18.2	-0.0126774	0.831408	0.0123155	42.4193
18.4	-0.0128726	0.829297	0.0126604	42.9902
18.6	-0.0130679	0.827189	0.0130072	43.5617
18.8	-0.0132635	0.825088	0.0133615	44.1355
19	-0.0134592	0.822989	0.013718	44.71
19.2	-0.0136551	0.820896	0.0140797	45.2861
19.4	-0.0138511	0.818808	0.0144453	45.8635
19.6	-0.0140473	0.816723	0.014814	46.4419
19.8	-0.0142437	0.814644	0.0151883	47.0222
20	-0.0144401	0.812568	0.0155643	47.6031
20.2	-0.0146368	0.810499	0.015946	48.1861
20.4	-0.0148336	0.808432	0.01633	48.7699
20.6	-0.0150306	0.806371	0.0167176	49.3552
20.8	-0.0152277	0.804314	0.0171091	49.9419
21	-0.0154249	0.80226	0.0175024	50.5294
21.2	-0.0156223	0.800214	0.0179008	51.119
21.4	-0.0158199	0.79817	0.0183008	51.7093
21.6	-0.0160175	0.796131	0.0187044	52.3012
21.8	-0.0162154	0.794096	0.0191108	52.8943
22	-0.0164133	0.792064	0.0195191	53.4884
22.2	-0.0166115	0.790039	0.0199314	54.0844
22.4	-0.0168097	0.788016	0.0203451	54.6812
22.6	-0.0170082	0.785999	0.0207619	55.2796
22.8	-0.0172067	0.783986	0.021181	55.8791
23	-0.0174054	0.781975	0.0216018	56.4797
23.2	-0.0176043	0.779971	0.0220258	57.0821
23.4	-0.0178033	0.777969	0.022451	57.6852
23.6	-0.0180025	0.775972	0.0228789	58.29
23.8	-0.0182019	0.773979	0.0233086	58.896
24	-0.0184014	0.771989	0.0237396	59.5028
24.2	-0.0186011	0.770005	0.0241735	60.1116
24.4	-0.0188009	0.768023	0.0246083	60.7211
24.6	-0.0190009	0.766046	0.0250452	61.3321
24.8	-0.0192011	0.764073	0.0254837	61.9445
25	-0.0194014	0.762102	0.0259233	62.5576
25.2	-0.019602	0.760137	0.0263652	63.1726
25.4	-0.0198027	0.758175	0.026808	63.7885
25.6	-0.0200036	0.756216	0.0272522	64.4056
25.8	-0.0202047	0.754261	0.0276981	65.0242
26	-0.020406	0.752309	0.0281448	65.6437
26.2	-0.0206075	0.750362	0.0285931	66.2647
26.4	-0.0208092	0.748417	0.0290425	66.8869
26.6	-0.021011	0.746475	0.0294927	67.51
26.8	-0.0212132	0.744539	0.0299445	68.1349
27	-0.0214155	0.742604	0.030397	68.7606
27.2	-0.021618	0.740673	0.0308506	69.3876
27.4	-0.0218208	0.738746	0.0313052	70.0161
27.6	-0.0220238	0.736821	0.0317605	70.6453
27.8	-0.022227	0.7349	0.032217	71.2761
28	-0.0224305	0.732982	0.0326741	71.9081
28.2	-0.0226342	0.731067	0.0331319	72.5409
28.4	-0.0228382	0.729156	0.0335908	73.1755
28.6	-0.0230424	0.727247	0.0340502	73.811
28.8	-0.0232469	0.72534	0.0345102	74.4475
29	-0.0234516	0.723438	0.0349711	75.0856
29.2	-0.0236566	0.721537	0.0354325	75.7246
29.4	-0.0238619	0.71964	0.0358945	76.3649
29.6	-0.0240675	0.717746	0.0363571	77.0065
29.8	-0.0242734	0.715854	0.0368201	77.6489
30	-0.0244796	0.713965	0.0372838	78.2929
30.2	-0.024686	0.712079	0.0377479	78.938
30.4	-0.0248927	0.710194	0.0382123	79.5839
30.6	-0.0250999	0.708313	0.0386774	80.2315
30.8	-0.0253073	0.706434	0.0391427	80.88
31	-0.025515	0.704557	0.0396083	81.5294
31.2	-0.0257231	0.702684	0.0400745	82.1805
31.4	-0.0259315	0.700812	0.0405409	82.8325
31.6	-0.0261402	0.698943	0.0410075	83.4855
31.8	-0.0263495	0.697076	0.0414745	84.1401
32	-0.0265589	0.695211	0.0419417	84.7955
32.2	-0.0267687	0.693348	0.0424091	85.452
32.4	-0.0269791	0.691488	0.0428767	86.11
32.6	-0.0271897	0.689629	0.0433445	86.7688
32.8	-0.0274007	0.687773	0.0438125	87.4288
33	-0.0276122	0.685918	0.0442806	88.0902
33.2	-0.027824	0.684066	0.0447488	88.7524
33.4	-0.0280362	0.682215	0.0452171	89.4158
33.6	-0.028249	0.680366	0.0456854	90.0805
33.8	-0.0284621	0.678519	0.0461538	90.7462
34	-0.0286756	0.676673	0.0466223	91.4129
34.2	-0.0288898	0.67483	0.0470907	92.0811
34.4	-0.0291042	0.672987	0.0475591	92.7501
34.6	-0.0293192	0.671147	0.0480275	93.4202
34.8	-0.0295348	0.669308	0.0484957	94.0917
35	-0.0297507	0.66747	0.048964	94.764
35.2	-0.0299671	0.665634	0.0494321	95.4374
35.4	-0.0301842	0.663799	0.0499001	96.1123
35.6	-0.0304017	0.661966	0.0503679	96.7879
35.8	-0.0306197	0.660134	0.0508357	97.4646
36	-0.0308384	0.658303	0.0513032	98.1427
36.2	-0.0310575	0.656474	0.0517705	98.8217
36.4	-0.0312771	0.654645	0.0522377	99.5016
36.6	-0.0314975	0.652819	0.0527045	100.183
36.8	-0.0317183	0.650993	0.0531712	100.865
37	-0.0319396	0.649168	0.0536377	101.548
37.2	-0.0321617	0.647345	0.0541038	102.233
37.4	-0.0323843	0.645523	0.0545697	102.919
37.6	-0.0326074	0.643702	0.0550353	103.605
37.8	-0.0328314	0.641882	0.0555006	104.293
38	-0.0330559	0.640063	0.0559655	104.982
38.2	-0.0332808	0.638245	0.0564303	105.671
38.4	-0.0335066	0.636429	0.0568946	106.362
38.6	-0.033733	0.634614	0.0573585	107.054
38.8	-0.03396	0.632799	0.0578222	107.747
39	-0.0341876	0.630986	0.0582855	108.441
39.2	-0.034416	0.629174	0.0587483	109.136
39.4	-0.034645	0.627363	0.0592109	109.832
39.6	-0.0348745	0.625553	0.0596731	110.529
39.8	-0.035105	0.623745	0.0601348	111.228
40	-0.0353361	0.621937	0.0605962	111.927
40.2	-0.0355677	0.620131	0.0610572	112.627
40.4	-0.0358002	0.618326	0.0615178	113.328
40.6	-0.0360334	0.616522	0.0619779	114.031
40.8	-0.0362672	0.614719	0.0624377	114.734
41	-0.0365018	0.612918	0.0628972	115.438
41.2	-0.0367372	0.611118	0.0633561	116.144
41.4	-0.0369732	0.609319	0.0638147	116.85
41.6	-0.0372098	0.607522	0.064273	117.558
41.8	-0.0374474	0.605726	0.0647307	118.266
42	-0.0376856	0.603932	0.0651881	118.976
42.2	-0.0379245	0.602138	0.0656452	119.686
42.4	-0.0381642	0.600347	0.0661018	120.398
42.6	-0.0384047	0.598557	0.0665581	121.11
42.8	-0.0386459	0.596769	0.0670141	121.824
43	-0.0388877	0.594982	0.0674697	122.538
43.2	-0.0391305	0.593197	0.0679249	123.253
43.4	-0.039374	0.591414	0.0683798	123.97
43.6	-0.0396181	0.589632	0.0688345	124.687
43.8	-0.039863	0.587852	0.0692889	125.406
44	-0.0401088	0.586075	0.069743	126.125
44.2	-0.0403553	0.584299	0.0701968	126.846
44.4	-0.0406023	0.582525	0.0706505	127.567
44.6	-0.0408504	0.580753	0.0711039	128.289
44.8	-0.0410991	0.578984	0.0715572	129.013
45	-0.0413485	0.577216	0.0720103	129.737
45.2	-0.0415986	0.575451	0.0724634	130.462
45.4	-0.0418496	0.573688	0.0729164	131.188
45.6	-0.0421013	0.571927	0.0733693	131.915
45.8	-0.0423536	0.570169	0.0738223	132.643
46	-0.0426067	0.568413	0.0742753	133.373
46.2	-0.0428606	0.56666	0.0747285	134.103
46.4	-0.0431151	0.564909	0.0751818	134.834
46.6	-0.0433702	0.563161	0.0756353	135.565
46.8	-0.0436262	0.561415	0.0760892	136.298
47	-0.0438829	0.559673	0.0765434	137.032
47.2	-0.0441401	0.557933	0.076998	137.767
47.4	-0.0443979	0.556195	0.077453	138.502
47.6	-0.0446566	0.554461	0.0779087	139.239
47.8	-0.0449158	0.552729	0.0783651	139.977
48	-0.0451756	0.551	0.0788221	140.715
48.2	-0.0454361	0.549274	0.0792799	141.454
48.4	-0.0456973	0.547551	0.0797387	142.195
48.6	-0.045959	0.54583	0.0801984	142.936
48.8	-0.0462214	0.544111	0.0806589	143.678
49	-0.0464845	0.542394	0.0811204	144.421
49.2	-0.0467485	0.540679	0.0815832	145.165
49.4	-0.0470132	0.538965	0.0820468	145.91
49.6	-0.0472785	0.537251	0.0825114	146.655
49.8	-0.0475449	0.535538	0.0829773	147.402
50	-0.0478123	0.533825	0.0834443	148.15
50.2	-0.0480806	0.53211	0.0839122	148.898
50.4	-0.04835	0.530395	0.084381	149.647
50.6	-0.0486206	0.528676	0.084851	150.397
50.8	-0.0488927	0.526954	0.085322	151.149
51	-0.0491662	0.525229	0.0857938	151.901
51.2	-0.049441	0.523499	0.0862663	152.653
51.4	-0.0497178	0.521762	0.0867397	153.407
51.6	-0.0499967	0.520016	0.0872136	154.162
51.8	-0.0502776	0.518263	0.0876879	154.917
52	-0.0505606	0.5165	0.0881625	155.673
52.2	-0.0508463	0.514725	0.0886373	156.431
52.4	-0.0511354	0.512934	0.0891119	157.189
52.6	-0.0514274	0.511129	0.089586	157.948
52.8	-0.0517226	0.509308	0.0900596	158.707
53	-0.0520219	0.507466	0.0905321	159.468
53.2	-0.0523265	0.505597	0.0910028	160.229
53.4	-0.0526357	0.503703	0.0914716	160.992
53.6	-0.0529501	0.501783	0.091938	161.755
53.8	-0.0532702	0.499833	0.0924014	162.519
54	-0.0535995	0.497835	0.0928595	163.284
54.2	-0.0539364	0.495797	0.0933127	164.05
54.4	-0.0542815	0.493716	0.0937604	164.816
54.6	-0.0546355	0.49159	0.0942019	165.583
54.8	-0.055003	0.489396	0.0946334	166.351
55	-0.0553828	0.487143	0.0950556	167.121
55.2	-0.0557748	0.484831	0.0954681	167.89
55.4	-0.0561799	0.482458	0.0958703	168.661
55.6	-0.056602	0.48001	0.0962586	169.432
55.8	-0.057043	0.477483	0.0966308	170.205
56	-0.0575006	0.474891	0.0969887	170.978
56.2	-0.0579753	0.472237	0.0973313	171.752
56.4	-0.0584683	0.469521	0.0976573	172.526
56.6	-0.0589865	0.466734	0.0979594	173.302
56.8	-0.0595225	0.463912	0.0982437	174.078
57	-0.0600754	0.461066	0.0985104	174.855
57.2	-0.0606441	0.458212	0.0987599	175.633
57.4	-0.0612297	0.455375	0.0989896	176.412
57.6	-0.0618275	0.452588	0.0992026	177.191
57.8	-0.062433	0.449865	0.0994027	177.972
58	-0.0630441	0.447222	0.0995915	178.753
58.2	-0.0636582	0.444676	0.0997704	179.534
58.4	-0.0642711	0.442292	0.0999396	180.317
58.6	-0.0648793	0.440041	0.100105	181.1
58.8	-0.0654809	0.43793	0.100268	181.884
59	-0.0660736	0.435964	0.10043	182.669
59.2	-0.0666536	0.434168	0.100594	183.455
59.4	-0.0672172	0.432553	0.100765	184.241
59.6	-0.0677657	0.43108	0.100942	185.029
59.8	-0.0682986	0.429745	0.101128	185.817
60	-0.0688149	0.428542	0.101323	186.605
60.2	-0.0693099	0.427492	0.101533	187.395
60.4	-0.0697859	0.426566	0.101758	188.185
60.6	-0.0702449	0.425742	0.101996	188.976
60.8	-0.0706874	0.425011	0.102249	189.768
61	-0.0711136	0.424366	0.102518	190.56
61.2	-0.07152	0.42382	0.102808	191.353
61.4	-0.0719121	0.423339	0.103114	192.147
61.6	-0.0722919	0.422915	0.103437	192.942
61.8	-0.072661	0.422541	0.103775	193.737
62	-0.0730212	0.422211	0.104129	194.533
62.2	-0.0733766	0.421924	0.104503	195.33
62.4	-0.0737401	0.421656	0.104885	196.127
62.6	-0.0741394	0.421388	0.105261	196.926
62.8	-0.0746435	0.42109	0.1056	197.725
63	-0.0753793	0.42072	0.105853	198.524
63.2	-0.0765342	0.419292	0.105914	199.325
63.4	-0.0769745	0.418513	0.10593	200.126
63.6	-0.0770642	0.418233	0.10593	200.928
63.8	-0.0770641	0.418225	0.10593	201.73
64	-0.0770654	0.418217	0.10593	202.533
64.2	-0.0770694	0.418209	0.10593	203.337
64.4	-0.0770756	0.418202	0.10593	204.142
64.6	-0.0770836	0.418195	0.10593	204.947
64.8	-0.0770942	0.418188	0.10593	205.753
65	-0.0771015	0.418182	0.10593	206.559
65.2	-0.0767862	0.418176	0.10593	207.367
65.4	-0.0774731	0.418171	0.10593	208.175
65.6	-0.077908	0.418166	0.10593	208.983
65.8	-0.0779087	0.418161	0.10593	209.793
66	-0.0779089	0.418156	0.10593	210.603
66.2	-0.077909	0.418151	0.10593	211.413
66.4	-0.077909	0.418147	0.10593	212.225
66.6	-0.0779089	0.418143	0.10593	213.037
66.8	-0.0779088	0.418139	0.10593	213.849
67	-0.0779087	0.418136	0.10593	214.662
67.2	-0.0779086	0.418132	0.10593	215.476
67.4	-0.0779085	0.418129	0.10593	216.291
67.6	-0.0779086	0.418126	0.10593	217.106
67.8	-0.0779087	0.418123	0.10593	217.922
68	-0.077909	0.41812	0.10593	218.739
68.2	-0.0779092	0.418117	0.10593	219.556
68.4	-0.0779093	0.418115	0.10593	220.374
68.6	-0.0779095	0.418113	0.10593	221.192
68.8	-0.0779097	0.41811	0.10593	222.011
69	-0.0779097	0.418108	0.10593	222.831
69.2	-0.0779096	0.418106	0.10593	223.651
69.4	-0.0779096	0.418104	0.10593	224.472
69.6	-0.0779096	0.418102	0.10593	225.294
69.8	-0.0779095	0.418101	0.10593	226.116
70	-0.0779093	0.418099	0.10593	226.938
70.2	-0.077909	0.418097	0.10593	227.762
70.4	-0.0779088	0.418096	0.10593	228.586
70.6	-0.0779088	0.418095	0.10593	229.41
70.8	-0.0779088	0.418093	0.10593	230.236
71	-0.0779086	0.418092	0.10593	231.061
71.2	-0.0779084	0.418091	0.10593	231.888
71.4	-0.0779083	0.41809	0.10593	232.715
71.6	-0.0779083	0.418089	0.10593	233.542
71.8	-0.0779084	0.418088	0.10593	234.37
72	-0.0779086	0.418087	0.10593	235.199
72.2	-0.0779087	0.418086	0.10593	236.028
72.4	-0.0779086	0.418085	0.10593	236.858
72.6	-0.0779085	0.418084	0.10593	237.689
72.8	-0.0779085	0.418083	0.10593	238.52
73	-0.0779086	0.418083	0.10593	239.351
73.2	-0.0779089	0.418082	0.10593	240.183
73.4	-0.0779091	0.418081	0.10593	241.016
73.6	-0.0779092	0.418081	0.10593	241.849
73.8	-0.0779092	0.41808	0.10593	242.683
74	-0.0779093	0.418079	0.10593	243.518
74.2	-0.0779095	0.418079	0.10593	244.353
74.4	-0.0779095	0.418078	0.10593	245.188
74.6	-0.0779093	0.418078	0.10593	246.024
74.8	-0.0779092	0.418077	0.10593	246.861
75	-0.0779091	0.418077	0.10593	247.698
75.2	-0.0779091	0.418077	0.10593	248.535
75.4	-0.0779091	0.418076	0.10593	249.374
75.6	-0.0779091	0.418076	0.10593	250.212
75.8	-0.0779091	0.418076	0.10593	251.052
76	-0.077909	0.418075	0.10593	251.891
76.2	-0.077909	0.418075	0.10593	252.732
76.4	-0.0779092	0.418075	0.10593	253.573
76.6	-0.0779094	0.418074	0.10593	254.414
76.8	-0.0779093	0.418074	0.10593	255.256
77	-0.0779089	0.418074	0.10593	256.098
77.2	-0.0779087	0.418074	0.10593	256.941
77.4	-0.0779085	0.418073	0.10593	257.784
77.6	-0.0779085	0.418073	0.10593	258.628
77.8	-0.0779088	0.418073	0.10593	259.473
78	-0.0779089	0.418073	0.10593	260.318
78.2	-0.077909	0.418073	0.10593	261.163
78.4	-0.0779089	0.418072	0.10593	262.009
78.6	-0.0779088	0.418072	0.10593	262.855
78.8	-0.0779087	0.418072	0.10593	263.702
79	-0.0779085	0.418072	0.10593	264.549
79.2	-0.0779086	0.418072	0.10593	265.397
79.4	-0.0779085	0.418072	0.10593	266.246
79.6	-0.0779085	0.418071	0.10593	267.094
79.8	-0.0779085	0.418071	0.10593	267.944
80	-0.0779086	0.418071	0.10593	268.793
80.2	-0.0779086	0.418071	0.10593	269.643
80.4	-0.0779087	0.418071	0.10593	270.494
80.6	-0.0779091	0.418071	0.10593	271.345
80.8	-0.0779094	0.418071	0.10593	272.197
81	-0.0779094	0.418071	0.10593	273.049
81.2	-0.0779092	0.418071	0.10593	273.901
81.4	-0.0779088	0.418071	0.10593	274.754
81.6	-0.0779085	0.418071	0.10593	275.607
81.8	-0.0779085	0.41807	0.10593	276.461
82	-0.077909	0.41807	0.10593	277.315
82.2	-0.0779094	0.41807	0.10593	278.17
82.4	-0.0779096	0.41807	0.10593	279.025
82.6	-0.0779095	0.41807	0.10593	279.881
82.8	-0.0779092	0.41807	0.10593	280.737
83	-0.0779088	0.41807	0.10593	281.593
83.2	-0.0779086	0.41807	0.10593	282.45
83.4	-0.0779086	0.41807	0.10593	283.307
83.6	-0.0779089	0.41807	0.10593	284.165
83.8	-0.0779091	0.41807	0.10593	285.023
84	-0.077909	0.41807	0.10593	285.882
84.2	-0.0779087	0.41807	0.10593	286.74
84.4	-0.0779085	0.41807	0.10593	287.6
84.6	-0.0779084	0.41807	0.10593	288.459
84.8	-0.0779086	0.41807	0.10593	289.32
85	-0.0779089	0.41807	0.10593	290.18
85.2	-0.0779092	0.41807	0.10593	291.041
85.4	-0.0779094	0.41807	0.10593	291.902
85.6	-0.0779094	0.41807	0.10593	292.764
85.8	-0.0779093	0.41807	0.10593	293.626
86	-0.0779089	0.41807	0.10593	294.489
86.2	-0.0779087	0.41807	0.10593	295.351
86.4	-0.0779088	0.41807	0.10593	296.215
86.6	-0.077909	0.41807	0.10593	297.078
86.8	-0.0779092	0.41807	0.10593	297.942
87	-0.0779093	0.41807	0.10593	298.807
87.2	-0.0779093	0.41807	0.10593	299.671
87.4	-0.0779091	0.418069	0.10593	300.536
87.6	-0.0779091	0.418069	0.10593	301.402
87.8	-0.077909	0.418069	0.10593	302.268
88	-0.077909	0.418069	0.10593	303.134
88.2	-0.0779091	0.418069	0.10593	304
88.4	-0.0779093	0.418069	0.10593	304.867
88.6	-0.0779095	0.418069	0.10593	305.734
88.8	-0.0779096	0.418069	0.10593	306.602
89	-0.0779094	0.418069	0.10593	307.47
89.2	-0.0779091	0.418069	0.10593	308.338
89.4	-0.0779088	0.418069	0.10593	309.206
89.6	-0.0779085	0.418069	0.10593	310.075
89.8	-0.0779085	0.418069	0.10593	310.944
