# Supplementary material for: Gas transport in firn: multiple-tracer characterisation and model intercomparison for NEEM, Northern Greenland
Source: Copernicus journal article supplement (doi:10.5194/acp-12-4259-2012), 2012-05-14
Supplement: Supplementary file 13 [file NEEM08_US_INSTAAR.xls]

## Sheet: Diffusivity
depth	Molec diff	D eddy
Depth	Diffmolec	Diffeddy
0	1.10582e-05	1.47e-05
1	1.09498e-05	1.14e-05
2	1.08896e-05	8.91e-06
3	1.07571e-05	6.94e-06
4	1.06607e-05	5.4e-06
5	1.05644e-05	4.21e-06
6	1.04318e-05	3.28e-06
7	1.03475e-05	2.55e-06
8	1.02391e-05	1.99e-06
9	1.01668e-05	1.55e-06
10	1.00584e-05	1.21e-06
11	9.92592e-06	9.39e-07
12	9.80546e-06	7.31e-07
13	9.6609e-06	5.69e-07
14	9.54044e-06	4.44e-07
15	9.3718e-06	3.45e-07
16	9.27543e-06	2.69e-07
17	9.13088e-06	2.1e-07
18	9.07065e-06	1.63e-07
19	8.95019e-06	1.27e-07
20	8.84178e-06	9.9e-08
21	8.78155e-06	7.71e-08
22	8.66109e-06	6e-08
23	8.4563e-06	4.67e-08
24	8.3238e-06	3.64e-08
25	8.20334e-06	2.84e-08
26	8.14311e-06	2.21e-08
27	7.99855e-06	1.72e-08
28	7.92628e-06	1.34e-08
29	7.84196e-06	1e-08
30	7.75763e-06	1e-08
31	7.61308e-06	1e-08
32	7.45648e-06	1e-08
33	7.28784e-06	1e-08
34	6.91441e-06	1e-08
35	6.55303e-06	1e-08
36	6.07119e-06	1e-08
37	5.67367e-06	1e-08
38	5.24002e-06	1e-08
39	4.92682e-06	1e-08
40	4.5293e-06	1e-08
41	4.20406e-06	1e-08
42	3.99928e-06	1e-08
43	3.79449e-06	1e-08
44	3.72222e-06	1e-08
45	3.64994e-06	1e-08
46	3.58971e-06	1e-08
47	3.51744e-06	1e-08
48	3.44516e-06	1e-08
49	3.37288e-06	1e-08
50	2.95127e-06	1e-08
51	2.89104e-06	1e-08
52	2.36102e-06	1e-08
53	1.85509e-06	1e-08
54	1.63826e-06	1e-08
55	1.55394e-06	1e-08
56	1.28892e-06	1e-08
57	9.13088e-07	1e-08
58	6.22779e-07	1e-08
59	5.79413e-07	1e-08
59.62	5.42071e-07	1e-08
59.88	5.26411e-07	9.9e-09
60.12	4.96296e-07	9.8e-09
60.38	4.72204e-07	9.7e-09
60.62	3.90291e-07	9.6e-09
60.88	3.28856e-07	9.5e-09
61.12	3.25242e-07	9.5e-09
61.38	3.09583e-07	9.5e-09
61.62	2.91514e-07	9.39e-09
61.88	2.48148e-07	8.2e-09
62.12	1.50575e-07	7.01e-09
62.38	6.93851e-08	7e-09
62.62	3.57767e-08	5.94e-09
62.88	1.95145e-08	5.08e-09
63.12	9.22725e-09	3.74e-09
63.38	5.33639e-09	4.5e-09
63.62	2.84286e-09	5.69e-09
63.88	1.56598e-09	7.33e-09
64.12	1.01187e-09	8.05e-09
64.38	5.33639e-10	7.38e-09
64.62	2.84286e-10	5.8e-09
64.88	1.40938e-10	4.45e-09
65.12	7.75763e-11	2.32e-09
65.38	4.09565e-11	1.35e-09
65.62	2.4092e-11	8.78e-10
65.88	1.26483e-11	8.24e-10
66.12	6.0471e-12	7.68e-10
66.38	3.18015e-12	7.68e-10
66.62	1.69849e-12	6.4e-10
66.88	8.39607e-13	7.2e-10
67.12	4.50521e-13	1.63e-09
67.38	4.5293e-14	2.21e-09
67.62	0	2.77e-09
67.88	0	3.17e-09
68.12	0	3.26e-09
68.38	0	2.39e-09
68.62	0	2.83e-09
68.88	0	4.49e-09
69.12	0	5.74e-09
69.38	0	6.34e-09
69.62	0	7.11e-09
69.88	0	8.45e-09
70.12	0	8.67e-09
70.38	0	7.71e-09
70.62	0	6.15e-09
70.88	0	5.79e-09
71.12	0	3.63e-09
71.38	0	3.33e-09
71.62	0	4.65e-09
71.88	0	6.05e-09
72.12	0	6.51e-09
72.38	0	6.51e-09
72.62	0	6.51e-09
72.88	0	6.51e-09
73.12	0	6.51e-09
73.38	0	6.51e-09
73.62	0	6.57e-09
73.88	0	8e-09
74.12	0	9e-09
74.38	0	1e-08
74.62	0	1e-08
74.88	0	1e-08
75.12	0	1e-08
75.38	0	1e-08
75.62	0	1e-08
75.88	0	1e-08
76.12	0	1e-08
76.38	0	1e-08
76.62	0	1e-08
76.88	0	1e-08
77.12	0	1e-08
77.38	0	1e-08
77.62	0	1e-08
77.88	0	1e-08
78.12	0	1e-08
78.38	0	1e-08
78.62	0	1e-08

## Sheet: profiles
depth	CO2	CH4	SF6	d15N2
0	382.416	1837.19	6.647	1
1	382.981	1838.49	6.6356	1
2	383.59	1839.94	6.6219	1
3	384.192	1841.44	6.6056	1.00001
4	384.771	1842.97	6.5867	1.00001
5	385.305	1844.49	6.5649	1.00001
6	385.78	1845.96	6.5404	1.00002
7	386.182	1847.38	6.5133	1.00002
8	386.505	1848.71	6.4837	1.00003
9	386.745	1849.94	6.4519	1.00003
10	386.903	1851.06	6.4181	1.00003
11	386.983	1852.06	6.3825	1.00004
12	386.99	1852.96	6.3452	1.00004
13	386.93	1853.74	6.3066	1.00005
14	386.81	1854.41	6.2667	1.00005
15	386.639	1854.97	6.2259	1.00006
16	386.425	1855.43	6.1843	1.00006
17	386.175	1855.79	6.1425	1.00007
18	385.898	1856.06	6.1004	1.00007
19	385.601	1856.24	6.0586	1.00008
20	385.29	1856.34	6.0169	1.00008
21	384.969	1856.37	5.9754	1.00009
22	384.643	1856.34	5.9344	1.00009
23	384.315	1856.26	5.8935	1.00009
24	383.984	1856.12	5.8526	1.0001
25	383.656	1855.95	5.8118	1.0001
26	383.332	1855.74	5.7714	1.00011
27	383.017	1855.5	5.7316	1.00011
28	382.709	1855.23	5.692	1.00012
29	382.411	1854.95	5.653	1.00012
30	382.125	1854.65	5.6146	1.00013
31	381.849	1854.34	5.5768	1.00013
32	381.583	1854.02	5.5393	1.00014
33	381.326	1853.7	5.5021	1.00014
34	381.078	1853.37	5.4651	1.00015
35	380.832	1853.02	5.4272	1.00015
36	380.588	1852.67	5.3885	1.00016
37	380.34	1852.3	5.348	1.00016
38	380.092	1851.92	5.3061	1.00017
39	379.84	1851.53	5.2622	1.00017
40	379.588	1851.14	5.2172	1.00018
41	379.331	1850.73	5.17	1.00018
42	379.071	1850.33	5.1211	1.00019
43	378.814	1849.93	5.0717	1.00019
44	378.559	1849.54	5.0218	1.00019
45	378.313	1849.18	4.9731	1.0002
46	378.076	1848.84	4.9257	1.0002
47	377.848	1848.53	4.8798	1.00021
48	377.628	1848.24	4.8354	1.00021
49	377.416	1847.97	4.7925	1.00022
50	377.211	1847.73	4.7512	1.00022
51	376.991	1847.49	4.707	1.00023
52	376.779	1847.27	4.665	1.00023
53	376.538	1847.04	4.6173	1.00024
54	376.252	1846.78	4.5617	1.00024
55	375.954	1846.53	4.5044	1.00025
56	375.666	1846.3	4.4499	1.00025
57	375.355	1846.06	4.3916	1.00026
58	374.967	1845.78	4.32	1.00026
59	374.476	1845.44	4.2312	1.00027
59.62	374.202	1845.24	4.1821	1.00027
59.88	374.089	1845.16	4.162	1.00027
60.12	373.98	1845.08	4.1424	1.00027
60.38	373.87	1845	4.1229	1.00027
60.62	373.762	1844.92	4.1037	1.00027
60.88	373.639	1844.83	4.0822	1.00027
61.12	373.505	1844.73	4.0587	1.00028
61.38	373.379	1844.63	4.0368	1.00028
61.62	373.257	1844.53	4.0158	1.00028
61.88	373.14	1844.42	3.9955	1.00028
62.12	373.016	1844.31	3.9743	1.00028
62.38	372.836	1844.14	3.944	1.00028
62.62	372.509	1843.8	3.8913	1.00028
62.88	371.989	1843.21	3.8107	1.00028
63.12	371.226	1842.23	3.6975	1.00028
63.38	369.976	1840.43	3.5201	1.00028
63.62	368.514	1837.99	3.3273	1.00028
63.88	366.996	1835.03	3.1437	1.00029
64.12	365.682	1832.12	2.9941	1.00029
64.38	364.558	1829.37	2.8692	1.00029
64.62	363.489	1826.51	2.7526	1.00029
64.88	362.387	1823.3	2.6339	1.00029
65.12	361.291	1819.8	2.517	1.00029
65.38	359.869	1814.77	2.3671	1.00029
65.62	358.189	1808.03	2.1932	1.00029
65.88	356.269	1799.17	2	1.00029
66.12	354.379	1789.19	1.8172	1.00029
66.38	352.484	1777.76	1.6429	1.00029
66.62	350.621	1764.91	1.4825	1.00029
66.88	348.41	1747.11	1.3102	1.00029
67.12	345.624	1721.26	1.1178	1.00029
67.38	343.426	1699.05	0.979	1.00029
67.62	341.465	1677.92	0.8648	1.00029
67.88	339.738	1658.28	0.7714	1.00029
68.12	338.178	1639.65	0.693	1.00029
68.38	336.671	1620.8	0.6233	1.00029
68.62	334.637	1594.05	0.5376	1.00029
68.88	332.594	1566.16	0.4583	1.00029
69.12	331.069	1544.76	0.4026	1.00029
69.38	329.817	1526.82	0.3594	1.00029
69.62	328.688	1510.32	0.3223	1.00029
69.88	327.703	1495.67	0.2913	1.00029
70.12	326.911	1483.73	0.2675	1.00029
70.38	326.207	1472.95	0.2472	1.00029
70.62	325.505	1462.01	0.2279	1.00029
70.88	324.729	1449.71	0.2079	1.00029
71.12	323.987	1437.71	0.1899	1.00029
71.38	322.934	1420.27	0.1665	1.00029
71.62	321.743	1400.11	0.1422	1.00029
71.88	320.785	1383.62	0.1241	1.00029
72.12	320.02	1370.26	0.1105	1.00029
72.38	319.324	1357.91	0.0989	1.00029
72.62	318.649	1345.81	0.0884	1.00029
72.88	317.995	1333.91	0.0789	1.00029
73.12	317.356	1322.16	0.0703	1.00029
73.38	316.729	1310.49	0.0624	1.00029
73.62	316.107	1298.79	0.0551	1.00029
73.88	315.488	1287.04	0.0484	1.00029
74.12	314.969	1277.14	0.043	1.00029
74.38	314.515	1268.39	0.0386	1.00029
74.62	314.118	1260.71	0.035	1.00029
74.88	313.74	1253.35	0.0317	1.00029
75.12	313.38	1246.32	0.0287	1.00029
75.38	313.04	1239.63	0.0261	1.00029
75.62	312.718	1233.28	0.0237	1.00029
75.88	312.414	1227.28	0.0216	1.00029
76.12	312.13	1221.63	0.0197	1.00029
76.38	311.865	1216.36	0.018	1.00029
76.62	311.62	1211.47	0.0165	1.00029
76.88	311.396	1206.98	0.0152	1.00029
77.12	311.193	1202.92	0.014	1.00029
77.38	311.013	1199.3	0.013	1.00029
77.62	310.857	1196.17	0.0122	1.00029
77.88	310.727	1193.55	0.0115	1.00029
78.12	310.624	1191.48	0.011	1.00029
78.38	310.552	1190.02	0.0107	1.00029
78.62	310.513	1189.23	0.0105	1.00029

## Sheet: scenarios
depth	SCEN1	SCEN2	SCEN3	SCEN4
0	0	1.00004	1	0.0002
0.2	0	0.999039	1	4.87167
0.4	-0.000263834	0.998084	1	9.74312
0.6	-0.000263834	0.997132	1	14.6146
0.8	-0.000263844	0.996185	1	19.486
1	-0.000263849	0.99524	1	24.3575
1.2	-0.000263855	0.994115	1	29.1125
1.4	-0.000263861	0.992995	1	33.8675
1.6	-0.000527733	0.991879	1	38.6224
1.8	-0.000527744	0.990769	1	43.3774
2	-0.000527756	0.989664	1	48.1324
2.2	-0.000527769	0.988376	1	52.7701
2.4	-0.000791673	0.987094	1	57.4078
2.6	-0.000527795	0.985818	1	62.0456
2.8	-0.000791713	0.98455	1	66.6833
3	-0.000791732	0.983288	1	71.321
3.2	-0.000791754	0.981835	1	75.8413
3.4	-0.000791777	0.980389	1	80.3615
3.6	-0.00105573	0.978952	1	84.8818
3.8	-0.00105576	0.977523	1	89.4021
4	-0.00105579	0.976102	1	93.9224
4.2	-0.00131978	0.974497	1	98.3252
4.4	-0.00131982	0.972903	1	102.728
4.6	-0.00131986	0.971317	1	107.131
4.8	-0.0013199	0.969742	1	111.534
5	-0.00158393	0.968176	1	115.937
5.2	-0.00158398	0.966436	1	120.222
5.4	-0.00184804	0.964708	1	124.508
5.6	-0.00158409	0.96299	1	128.793
5.8	-0.00184816	0.961284	1	133.079
6	-0.00184822	0.959589	1	137.364
6.2	-0.00211233	0.957726	1	141.532
6.4	-0.00211241	0.955876	1	145.701
6.6	-0.00237654	0.954039	1	149.869
6.8	-0.00237663	0.952214	1	154.038
7	-0.00264079	0.950402	1	158.206
7.2	-0.00264089	0.948438	1	162.258
7.4	-0.00290509	0.946488	1	166.31
7.6	-0.0029052	0.944551	1	170.362
7.8	-0.00316943	0.94263	1	174.413
8	-0.00316955	0.940722	1	178.465
8.2	-0.00316967	0.93867	1	182.401
8.4	-0.0036981	0.936634	1	186.337
8.6	-0.00369825	0.934612	1	190.273
8.8	-0.00422673	0.932607	1	194.209
9	-0.0042269	0.930616	1	198.145
9.2	-0.00422707	0.928497	1	201.966
9.4	-0.00449145	0.926393	1	205.787
9.6	-0.00449164	0.924306	1	209.608
9.8	-0.00475604	0.922235	1	213.43
10	-0.00475624	0.920181	1	217.251
10.2	-0.00502069	0.918	1	220.959
10.4	-0.00528516	0.915837	1	224.667
10.6	-0.00528539	0.91369	1	228.376
10.8	-0.00554989	0.911561	1	232.084
11	-0.00581442	0.90945	1	235.793
11.2	-0.00607898	0.907214	1	239.391
11.4	-0.00607925	0.904995	1	242.99
11.6	-0.00634384	0.902796	1	246.588
11.8	-0.00634412	0.900614	1	250.187
12	-0.00660875	0.898451	1	253.785
12.2	-0.00687341	0.896173	1	257.278
12.4	-0.00687372	0.893915	1	260.772
12.6	-0.00713842	0.891675	1	264.265
12.8	-0.00713874	0.889456	1	267.758
13	-0.00740347	0.887255	1.00001	271.251
13.2	-0.00766824	0.884942	1.00001	274.646
13.4	-0.00766859	0.88265	1.00001	278.041
13.6	-0.00819784	0.880377	1.00001	281.436
13.8	-0.00819822	0.878125	1.00001	284.831
14	-0.00846307	0.875893	1.00001	288.226
14.2	-0.00846347	0.873563	1.00001	291.534
14.4	-0.00872837	0.871255	1.00001	294.842
14.6	-0.00899329	0.868967	1.00001	298.149
14.8	-0.00925823	0.866701	1.00001	301.457
15	-0.00925867	0.864455	1.00001	304.765
15.2	-0.00952366	0.862114	1.00001	308.002
15.4	-0.00952412	0.859794	1.00001	311.239
15.6	-0.0100537	0.857494	1.00001	314.476
15.8	-0.0100542	0.855218	1.00001	317.713
16	-0.0103193	0.852964	1.00001	320.95
16.2	-0.0103198	0.850643	1.00001	324.128
16.4	-0.0108495	0.848344	1.00001	327.306
16.6	-0.0108501	0.846067	1.00001	330.484
16.8	-0.0113799	0.843811	1.00001	333.662
17	-0.0113804	0.841578	1.00001	336.84
17.2	-0.0116457	0.839276	1.00001	339.96
17.4	-0.0116462	0.836994	1.00001	343.079
17.6	-0.0121762	0.834735	1.00001	346.198
17.8	-0.0121768	0.832498	1.00001	349.318
18	-0.0124421	0.830284	1.00001	352.437
18.2	-0.0127074	0.828023	1.00001	355.499
18.4	-0.0129728	0.825784	1.00001	358.56
18.6	-0.0129734	0.823566	1.00001	361.622
18.8	-0.0132388	0.821372	1.00001	364.683
19	-0.0135043	0.819198	1.00001	367.744
19.2	-0.0137697	0.816968	1.00002	370.749
19.4	-0.0140352	0.814757	1.00002	373.753
19.6	-0.0137711	0.81257	1.00002	376.757
19.8	-0.0140366	0.810404	1.00002	379.761
20	-0.0143021	0.808262	1.00002	382.765
20.2	-0.0145677	0.806065	1.00002	385.712
20.4	-0.0148333	0.80389	1.00002	388.659
20.6	-0.0150989	0.801738	1.00002	391.607
20.8	-0.0153645	0.799606	1.00002	394.554
21	-0.0156302	0.797498	1.00002	397.501
21.2	-0.0156309	0.79535	1.00002	400.393
21.4	-0.0158966	0.793222	1.00002	403.284
21.6	-0.0161623	0.791118	1.00002	406.175
21.8	-0.0164281	0.789033	1.00002	409.066
22	-0.0164289	0.786972	1.00002	411.957
22.2	-0.0166946	0.784857	1.00002	414.793
22.4	-0.0169605	0.782764	1.00002	417.628
22.6	-0.0172263	0.780692	1.00002	420.464
22.8	-0.0174922	0.778642	1.00002	423.299
23	-0.017758	0.776614	1.00003	426.135
23.2	-0.0177589	0.774514	1.00003	428.916
23.4	-0.0182899	0.772435	1.00003	431.696
23.6	-0.0182908	0.770379	1.00003	434.477
23.8	-0.0188219	0.768344	1.00003	437.257
24	-0.0188228	0.766332	1.00003	440.038
24.2	-0.0190888	0.764265	1.00003	442.764
24.4	-0.0190897	0.76222	1.00003	445.49
24.6	-0.0193558	0.760198	1.00003	448.217
24.8	-0.0193567	0.758197	1.00003	450.943
25	-0.0196228	0.756218	1.00003	453.669
25.2	-0.019889	0.754189	1.00003	456.341
25.4	-0.0198899	0.75218	1.00003	459.014
25.6	-0.0204213	0.750193	1.00003	461.686
25.8	-0.0204223	0.748229	1.00003	464.359
26	-0.0206885	0.746287	1.00003	467.031
26.2	-0.0209548	0.74431	1.00004	469.65
26.4	-0.0209558	0.742353	1.00004	472.27
26.6	-0.0214873	0.740418	1.00004	474.889
26.8	-0.0214883	0.738504	1.00004	477.508
27	-0.0217547	0.736612	1.00004	480.128
27.2	-0.0217557	0.734666	1.00004	482.694
27.4	-0.0222874	0.73274	1.00004	485.261
27.6	-0.0222885	0.730836	1.00004	487.828
27.8	-0.0228202	0.728952	1.00004	490.394
28	-0.0228213	0.727091	1.00004	492.961
28.2	-0.0230878	0.725192	1.00004	495.476
28.4	-0.0230888	0.723314	1.00004	497.991
28.6	-0.0236207	0.721458	1.00004	500.505
28.8	-0.0236218	0.719621	1.00004	503.02
29	-0.0238884	0.717805	1.00004	505.535
29.2	-0.0241549	0.715951	1.00005	507.998
29.4	-0.0241561	0.714117	1.00005	510.462
29.6	-0.0246881	0.712302	1.00005	512.925
29.8	-0.0246893	0.710509	1.00005	515.389
30	-0.0249559	0.708736	1.00005	517.852
30.2	-0.0252226	0.706925	1.00005	520.265
30.4	-0.0252237	0.705134	1.00005	522.677
30.6	-0.0254904	0.703362	1.00005	525.09
30.8	-0.0254916	0.70161	1.00005	527.503
31	-0.0257583	0.699878	1.00005	529.915
31.2	-0.0260251	0.698095	1.00005	532.278
31.4	-0.0262918	0.696331	1.00005	534.64
31.6	-0.0262931	0.694587	1.00005	537.003
31.8	-0.0265599	0.692863	1.00005	539.365
32	-0.0268267	0.691158	1.00005	541.728
32.2	-0.0270935	0.689399	1.00006	544.041
32.4	-0.0270948	0.687659	1.00006	546.354
32.6	-0.0276273	0.685939	1.00006	548.667
32.8	-0.0276286	0.684238	1.00006	550.98
33	-0.0278955	0.682557	1.00006	553.293
33.2	-0.0281625	0.680818	1.00006	555.557
33.4	-0.0281638	0.679098	1.00006	557.821
33.6	-0.0286965	0.677399	1.00006	560.085
33.8	-0.0286978	0.675718	1.00006	562.349
34	-0.0289649	0.674056	1.00006	564.613
34.2	-0.029232	0.672286	1.00006	566.829
34.4	-0.0292333	0.670537	1.00006	569.044
34.6	-0.0295005	0.668807	1.00006	571.26
34.8	-0.0295019	0.667098	1.00006	573.476
35	-0.0297691	0.66541	1.00007	575.692
35.2	-0.0300363	0.66361	1.00007	577.86
35.4	-0.0303036	0.661831	1.00007	580.028
35.6	-0.0303051	0.660073	1.00007	582.196
35.8	-0.0305724	0.658337	1.00007	584.364
36	-0.0308397	0.656622	1.00007	586.532
36.2	-0.0311072	0.654753	1.00007	588.653
36.4	-0.0313746	0.652907	1.00007	590.774
36.6	-0.0316421	0.651084	1.00007	592.895
36.8	-0.0319096	0.649285	1.00007	595.016
37	-0.0321772	0.64751	1.00007	597.137
37.2	-0.0324448	0.645593	1.00007	599.211
37.4	-0.0327125	0.643701	1.00007	601.286
37.6	-0.0327142	0.641834	1.00007	603.36
37.8	-0.032982	0.639992	1.00007	605.435
38	-0.0332497	0.638177	1.00008	607.51
38.2	-0.0335176	0.636194	1.00008	609.538
38.4	-0.0337855	0.634238	1.00008	611.567
38.6	-0.0340534	0.632311	1.00008	613.596
38.8	-0.0343213	0.630412	1.00008	615.624
39	-0.0345893	0.628541	1.00008	617.653
39.2	-0.0345913	0.626536	1.00008	619.636
39.4	-0.0351255	0.624559	1.00008	621.62
39.6	-0.0351275	0.622613	1.00008	623.603
39.8	-0.0356618	0.620697	1.00008	625.587
40	-0.0356638	0.618812	1.00008	627.57
40.2	-0.0359321	0.616745	1.00008	629.509
40.4	-0.0362005	0.614712	1.00008	631.448
40.6	-0.0364689	0.612711	1.00008	633.387
40.8	-0.0367373	0.610745	1.00008	635.326
41	-0.0370057	0.608813	1.00008	637.264
41.2	-0.0372743	0.606717	1.00008	639.159
41.4	-0.0375429	0.604658	1.00009	641.054
41.6	-0.0378116	0.602636	1.00009	642.949
41.8	-0.0380802	0.600649	1.00009	644.844
42	-0.0383489	0.5987	1.00009	646.739
42.2	-0.0386177	0.59664	1.00009	648.59
42.4	-0.0388865	0.594617	1.00009	650.442
42.6	-0.0391554	0.592631	1.00009	652.293
42.8	-0.0394242	0.590684	1.00009	654.145
43	-0.0396931	0.588776	1.00009	655.996
43.2	-0.0399621	0.586755	1.00009	657.805
43.4	-0.0402311	0.584772	1.00009	659.614
43.6	-0.0405002	0.582829	1.00009	661.423
43.8	-0.0407693	0.580925	1.00009	663.232
44	-0.0410384	0.579062	1.00009	665.04
44.2	-0.0413075	0.577153	1.00009	666.807
44.4	-0.0415767	0.575282	1.00009	668.574
44.6	-0.0418458	0.57345	1.00009	670.34
44.8	-0.042115	0.571655	1.0001	672.107
45	-0.0423843	0.569899	1.0001	673.874
45.2	-0.0426535	0.568101	1.0001	675.599
45.4	-0.0429227	0.566339	1.0001	677.324
45.6	-0.043192	0.564614	1.0001	679.05
45.8	-0.0434613	0.562925	1.0001	680.775
46	-0.0437307	0.561273	1.0001	682.5
46.2	-0.044	0.559587	1.0001	684.185
46.4	-0.0442693	0.557935	1.0001	685.869
46.6	-0.0445386	0.556318	1.0001	687.554
46.8	-0.044808	0.554735	1.0001	689.238
47	-0.0450775	0.553187	1.0001	690.923
47.2	-0.0453469	0.551601	1.0001	692.567
47.4	-0.0456163	0.550047	1.0001	694.211
47.6	-0.0458857	0.548526	1.0001	695.856
47.8	-0.0461552	0.547038	1.0001	697.5
48	-0.0464247	0.545583	1.0001	699.144
48.2	-0.0466942	0.544091	1.0001	700.749
48.4	-0.0466968	0.54263	1.00011	702.354
48.6	-0.0469663	0.5412	1.00011	703.959
48.8	-0.046969	0.5398	1.00011	705.563
49	-0.0472386	0.538432	1.00011	707.168
49.2	-0.047775	0.537026	1.00011	708.734
49.4	-0.0477776	0.53565	1.00011	710.3
49.6	-0.0483141	0.534302	1.00011	711.866
49.8	-0.0483167	0.532983	1.00011	713.432
50	-0.0488533	0.531692	1.00011	714.998
50.2	-0.0491231	0.530212	1.00011	716.526
50.4	-0.049393	0.528763	1.00011	718.053
50.6	-0.0493959	0.527348	1.00011	719.581
50.8	-0.0496659	0.525964	1.00011	721.109
51	-0.0499358	0.524616	1.00011	722.636
51.2	-0.0502057	0.523232	1.00011	724.127
51.4	-0.0502086	0.521879	1.00011	725.617
51.6	-0.0507455	0.520554	1.00011	727.107
51.8	-0.0507484	0.51926	1.00012	728.597
52	-0.0510184	0.517996	1.00012	730.087
52.2	-0.0512888	0.516444	1.00012	731.541
52.4	-0.0515592	0.514929	1.00012	732.994
52.6	-0.0518297	0.513454	1.00012	734.447
52.8	-0.0521002	0.512017	1.00012	735.901
53	-0.0523708	0.510618	1.00012	737.354
53.2	-0.052642	0.50884	1.00012	738.771
53.4	-0.0529132	0.507114	1.00012	740.188
53.6	-0.0534517	0.50544	1.00012	741.606
53.8	-0.053723	0.503819	1.00012	743.023
54	-0.0539944	0.502251	1.00012	744.44
54.2	-0.0545332	0.500483	1.00012	745.822
54.4	-0.0545375	0.498771	1.00012	747.203
54.6	-0.0550765	0.497114	1.00012	748.585
54.8	-0.0550808	0.495514	1.00012	749.966
55	-0.05562	0.493971	1.00012	751.348
55.2	-0.0558916	0.492351	1.00012	752.695
55.4	-0.0564306	0.490782	1.00012	754.042
55.6	-0.0564349	0.489263	1.00013	755.389
55.8	-0.0569741	0.487795	1.00013	756.735
56	-0.0572459	0.486379	1.00013	758.082
56.2	-0.0577855	0.484681	1.00013	759.395
56.4	-0.0577902	0.48304	1.00013	760.708
56.6	-0.05833	0.481457	1.00013	762.02
56.8	-0.0583348	0.479932	1.00013	763.333
57	-0.0588747	0.478466	1.00013	764.646
57.2	-0.0591483	0.476421	1.00013	765.925
57.4	-0.0596895	0.474462	1.00013	767.204
57.6	-0.0599632	0.47259	1.00013	768.484
57.8	-0.0605047	0.470806	1.00013	769.763
58	-0.0607785	0.46911	1.00013	771.042
58.2	-0.0613217	0.466683	1.00013	772.289
58.4	-0.0618651	0.464388	1.00013	773.535
58.6	-0.0624086	0.462227	1.00013	774.782
58.8	-0.0629523	0.460203	1.00013	776.028
59	-0.0634961	0.458317	1.00013	777.275
59.2	-0.0637713	0.456338	1.00013	777.77
59.4	-0.0643145	0.454464	1.00013	778.266
59.6	-0.0645898	0.452695	1.00013	778.761
59.8	-0.0651332	0.45097	1.00013	779.867
60	-0.0656768	0.449216	1.00013	781.094
60.2	-0.0659524	0.447495	1.00013	782.316
60.4	-0.0664959	0.445857	1.00013	783.484
60.6	-0.06704	0.444103	1.00013	784.732
60.8	-0.0675845	0.442265	1.00014	785.886
61	-0.067862	0.44021	1.00014	787.083
61.2	-0.0684079	0.438137	1.00014	788.274
61.4	-0.0692215	0.436219	1.00014	789.413
61.6	-0.069499	0.434163	1.00014	790.629
61.8	-0.0700441	0.432222	1.00014	791.755
62	-0.0705899	0.430051	1.00014	792.922
62.2	-0.0711378	0.427295	1.00014	794.083
62.4	-0.0716892	0.423572	1.00014	795.193
62.6	-0.0727898	0.416543	1.00014	796.379
62.8	-0.0744405	0.405897	1.00014	797.477
63	-0.0763782	0.390578	1.00014	798.615
63.2	-0.0791514	0.368521	1.00014	799.748
63.4	-0.082226	0.341347	1.00014	800.83
63.6	-0.0853385	0.308628	1.00014	801.987
63.8	-0.0873757	0.27877	1.00014	803.057
64	-0.0886016	0.253644	1.00014	804.167
64.2	-0.0895455	0.23393	1.00014	805.271
64.4	-0.08966	0.218852	1.00014	806.327
64.6	-0.090051	0.204433	1.00014	807.455
64.8	-0.0901665	0.191491	1.00014	808.499
65	-0.0900155	0.179589	1.00014	809.582
65.2	-0.0904255	0.167036	1.00014	810.659
65.4	-0.0903107	0.154506	1.00014	811.689
65.6	-0.090512	0.138848	1.00014	812.789
65.8	-0.0907281	0.121954	1.00014	813.808
66	-0.0904067	0.107389	1.00014	814.864
66.2	-0.0903619	0.0950772	1.00014	815.915
66.4	-0.0905871	0.0852322	1.00014	816.92
66.6	-0.09083	0.0753059	1.00014	817.994
66.8	-0.0908217	0.0647137	1.00014	818.988
67	-0.0908824	0.053409	1.00014	820.018
67.2	-0.0909484	0.0440823	1.00014	821.044
67.4	-0.0906737	0.0376765	1.00014	822.024
67.6	-0.0906768	0.0320784	1.00014	823.072
67.8	-0.0909204	0.0280509	1.00014	824.043
68	-0.0908776	0.0248473	1.00014	825.049
68.2	-0.0908275	0.0222222	1.00014	826.05
68.4	-0.0907775	0.0198704	1.00014	827.007
68.6	-0.0908328	0.0166029	1.00014	828.03
68.8	-0.0905887	0.0137704	1.00014	828.978
69	-0.0908852	0.011648	1.00014	829.96
69.2	-0.0905579	0.0100854	1.00014	830.938
69.4	-0.090772	0.00890218	1.00014	831.873
69.6	-0.0906965	0.00782021	1.00014	832.872
69.8	-0.0908778	0.00700962	1.00014	833.797
70	-0.0904607	0.0063783	1.00014	834.757
70.2	-0.0906086	0.00588919	1.00014	835.712
70.4	-0.0907434	0.00549566	1.00014	836.625
70.6	-0.0905985	0.00509457	1.00014	837.602
70.8	-0.0907538	0.00470096	1.00014	838.506
71	-0.0906233	0.0043364	1.00014	839.443
71.2	-0.090522	0.00392394	1.00014	840.376
71.4	-0.0907598	0.00346216	1.00014	841.269
71.6	-0.090761	0.00292653	1.00014	842.223
71.8	-0.0909978	0.00255922	1.00014	843.106
72	-0.0909161	0.00227652	1.00014	844.023
72.2	-0.0908134	0.00205035	1.00014	844.935
72.4	-0.0909947	0.00186513	1.00014	845.807
72.6	-0.0908902	0.00168079	1.00014	846.74
72.8	-0.0907722	0.00152085	1.00014	847.603
73	-0.0906622	0.00137151	1.00014	848.498
73.2	-0.0905531	0.00123517	1.00014	849.39
73.4	-0.0907404	0.00111401	1.00014	850.243
73.6	-0.0909463	0.000988592	1.00014	851.154
73.8	-0.0908389	0.000875651	1.00014	851.998
74	-0.0907214	0.000781955	1.00014	852.872
74.2	-0.0908903	0.000705102	1.00014	853.743
74.4	-0.0907349	0.000642659	1.00014	854.576
74.6	-0.0908802	0.000586924	1.00014	855.466
74.8	-0.0907058	0.000538005	1.00014	856.289
75	-0.0905331	0.000492541	1.00014	857.143
75.2	-0.0906637	0.000452584	1.00014	857.993
75.4	-0.0907862	0.000419005	1.00014	858.804
75.6	-0.0906053	0.000384708	1.00014	859.671
75.8	-0.090719	0.000357062	1.00014	860.473
76	-0.0908335	0.00033228	1.00014	861.303
76.2	-0.0906343	0.000310058	1.00014	862.127
76.4	-0.0907355	0.000292746	1.00014	862.914
76.6	-0.0908382	0.000278649	1.00014	863.753
76.8	-0.0909276	0.000266563	1.00014	864.526
77	-0.0907045	0.000258234	1.00014	865.324
77.2	-0.0907854	0.00025266	1.00014	866.113
77.4	-0.090857	0.000249161	1.00014	866.862
77.6	-0.0906138	0.000247132	1.00014	867.652
77.8	-0.0906681	0.000246435	1.00014	868.369
78	-0.0907163	0.000246617	1.00014	869.091
78.2	-0.0907553	0.000247607	1.00014	869.776
78.4	-0.0907837	0.000247946	1.00014	870.377
78.6	-0.0908011	0.00025006	1.00014	870.858
