# Supplementary material for: Gas transport in firn: multiple-tracer characterisation and model intercomparison for NEEM, Northern Greenland
Source: Copernicus journal article supplement (doi:10.5194/acp-12-4259-2012), 2012-05-14
Supplement: Supplementary file 14 [file NEEM08_US_LGGE-GIPSA.xls]

## Sheet: Diffusivity
depth	Molec diff	D eddy
0	1.07563e-05	4.73228e-06
0.2	1.07563e-05	4.60554e-06
0.4	1.07563e-05	4.47976e-06
0.6	1.07563e-05	4.37886e-06
0.8	1.07563e-05	4.27963e-06
1	1.07563e-05	4.19986e-06
1.2	1.07563e-05	4.12155e-06
1.4	1.07563e-05	4.05514e-06
1.6	1.07563e-05	3.99145e-06
1.8	1.07563e-05	3.9465e-06
2	1.07563e-05	3.90265e-06
2.2	1.07563e-05	3.8644e-06
2.4	1.07563e-05	3.8287e-06
2.6	1.07563e-05	3.80071e-06
2.8	1.07563e-05	3.77408e-06
3	1.07563e-05	3.75048e-06
3.2	1.07563e-05	3.72875e-06
3.4	1.07563e-05	3.71168e-06
3.6	1.07563e-05	3.69705e-06
3.8	1.07563e-05	3.68276e-06
4	1.07563e-05	3.6688e-06
4.2	1.07563e-05	3.65601e-06
4.4	1.07563e-05	3.64347e-06
4.6	1.07563e-05	3.63171e-06
4.8	1.07563e-05	3.62124e-06
5	1.07563e-05	3.61251e-06
5.2	1.07563e-05	3.60277e-06
5.4	1.07563e-05	3.59323e-06
5.6	1.07563e-05	3.58458e-06
5.8	1.07563e-05	3.57338e-06
6	1.07563e-05	3.56288e-06
6.2	1.07563e-05	3.5529e-06
6.4	1.07563e-05	3.54334e-06
6.6	1.07563e-05	3.534e-06
6.8	1.07563e-05	3.52465e-06
7	1.07563e-05	3.51608e-06
7.2	1.07563e-05	3.50558e-06
7.4	1.07563e-05	3.49393e-06
7.6	1.07563e-05	3.48574e-06
7.8	1.07563e-05	3.47865e-06
8	1.07563e-05	3.46748e-06
8.2	1.07563e-05	3.45009e-06
8.4	1.07563e-05	3.43581e-06
8.6	1.07563e-05	3.41869e-06
8.8	1.07563e-05	3.39263e-06
9	1.07563e-05	3.3636e-06
9.2	1.07563e-05	3.3317e-06
9.4	1.07563e-05	3.29823e-06
9.6	1.07563e-05	3.26038e-06
9.8	1.07563e-05	3.22146e-06
10	1.07563e-05	3.17929e-06
10.2	1.07563e-05	3.13572e-06
10.4	1.07563e-05	3.08728e-06
10.6	1.07563e-05	3.03792e-06
10.8	1.07563e-05	2.97331e-06
11	1.07563e-05	2.90551e-06
11.2	1.07563e-05	2.83842e-06
11.4	1.07563e-05	2.77139e-06
11.6	1.07563e-05	2.70083e-06
11.8	1.07563e-05	2.63019e-06
12	1.07563e-05	2.50089e-06
12.2	1.07563e-05	2.36509e-06
12.4	1.07563e-05	2.22566e-06
12.6	1.07563e-05	2.0859e-06
12.8	1.07563e-05	1.94874e-06
13	1.07563e-05	1.81165e-06
13.2	1.07563e-05	1.67335e-06
13.4	1.07563e-05	1.53552e-06
13.6	1.07563e-05	1.40313e-06
13.8	1.07563e-05	1.27081e-06
14	1.07563e-05	1.13605e-06
14.2	1.07563e-05	1.00243e-06
14.4	1.07563e-05	8.82346e-07
14.6	1.07563e-05	7.62534e-07
14.8	1.07563e-05	6.47687e-07
15	1.07563e-05	5.33749e-07
15.2	1.07563e-05	4.23858e-07
15.4	1.07563e-05	3.16542e-07
15.6	1.07563e-05	2.20859e-07
15.8	1.07563e-05	1.3363e-07
16	1.07563e-05	8.01963e-08
16.2	1.07563e-05	2.69209e-08
16.4	1.0733e-05	0
16.6	1.06831e-05	0
16.8	1.06369e-05	0
17	1.05926e-05	0
17.2	1.05523e-05	0
17.4	1.05136e-05	0
17.6	1.04827e-05	0
17.8	1.0453e-05	0
18	1.04247e-05	0
18.2	1.03958e-05	0
18.4	1.03652e-05	0
18.6	1.03331e-05	0
18.8	1.03016e-05	0
19	1.02663e-05	0
19.2	1.02321e-05	0
19.4	1.01952e-05	0
19.6	1.01575e-05	0
19.8	1.01214e-05	0
20	1.00869e-05	0
20.2	1.00525e-05	0
20.4	1.0016e-05	0
20.6	9.9797e-06	0
20.8	9.94311e-06	0
21	9.90509e-06	0
21.2	9.86467e-06	0
21.4	9.82649e-06	0
21.6	9.7914e-06	0
21.8	9.75866e-06	0
22	9.72437e-06	0
22.2	9.69075e-06	0
22.4	9.6596e-06	0
22.6	9.62261e-06	0
22.8	9.58725e-06	0
23	9.55352e-06	0
23.2	9.51995e-06	0
23.4	9.4882e-06	0
23.6	9.45715e-06	0
23.8	9.42231e-06	0
24	9.38857e-06	0
24.2	9.35568e-06	0
24.4	9.32469e-06	0
24.6	9.2879e-06	0
24.8	9.25055e-06	0
25	9.21798e-06	0
25.2	9.18623e-06	0
25.4	9.15704e-06	0
25.6	9.12599e-06	0
25.8	9.09622e-06	0
26	9.06381e-06	0
26.2	9.02709e-06	0
26.4	8.98898e-06	0
26.6	8.9529e-06	0
26.8	8.91621e-06	0
27	8.87972e-06	0
27.2	8.84467e-06	0
27.4	8.81325e-06	0
27.6	8.77976e-06	0
27.8	8.74584e-06	0
28	8.7128e-06	0
28.2	8.67445e-06	0
28.4	8.63741e-06	0
28.6	8.59795e-06	0
28.8	8.55917e-06	0
29	8.52341e-06	0
29.2	8.48693e-06	0
29.4	8.44844e-06	0
29.6	8.40973e-06	0
29.8	8.36977e-06	0
30	8.32861e-06	0
30.2	8.28926e-06	0
30.4	8.24817e-06	0
30.6	8.20756e-06	0
30.8	8.16615e-06	0
31	8.12082e-06	0
31.2	8.07469e-06	0
31.4	8.02588e-06	0
31.6	7.97997e-06	0
31.8	7.93904e-06	0
32	7.89715e-06	0
32.2	7.85297e-06	0
32.4	7.80993e-06	0
32.6	7.7678e-06	0
32.8	7.72447e-06	0
33	7.68555e-06	0
33.2	7.64134e-06	0
33.4	7.59412e-06	0
33.6	7.544e-06	0
33.8	7.49581e-06	0
34	7.44738e-06	0
34.2	7.39739e-06	0
34.4	7.34442e-06	0
34.6	7.29126e-06	0
34.8	7.23678e-06	0
35	7.17843e-06	0
35.2	7.12278e-06	0
35.4	7.06797e-06	0
35.6	7.01224e-06	0
35.8	6.95659e-06	0
36	6.89983e-06	0
36.2	6.84377e-06	0
36.4	6.78885e-06	0
36.6	6.73491e-06	0
36.8	6.68217e-06	0
37	6.63164e-06	0
37.2	6.57885e-06	0
37.4	6.52786e-06	0
37.6	6.47986e-06	0
37.8	6.43121e-06	0
38	6.38559e-06	0
38.2	6.33808e-06	0
38.4	6.28954e-06	0
38.6	6.24206e-06	0
38.8	6.19201e-06	0
39	6.1422e-06	0
39.2	6.08907e-06	0
39.4	6.03642e-06	0
39.6	5.98628e-06	0
39.8	5.93413e-06	0
40	5.88043e-06	0
40.2	5.82701e-06	0
40.4	5.77293e-06	0
40.6	5.72167e-06	0
40.8	5.67343e-06	0
41	5.62268e-06	0
41.2	5.57087e-06	0
41.4	5.51826e-06	0
41.6	5.46506e-06	0
41.8	5.41346e-06	0
42	5.37392e-06	0
42.2	5.32649e-06	0
42.4	5.27875e-06	0
42.6	5.23127e-06	0
42.8	5.17742e-06	0
43	5.12437e-06	0
43.2	5.07191e-06	0
43.4	5.01745e-06	0
43.6	4.96642e-06	0
43.8	4.91395e-06	0
44	4.86089e-06	0
44.2	4.8104e-06	0
44.4	4.75864e-06	0
44.6	4.7053e-06	0
44.8	4.65411e-06	0
45	4.59999e-06	0
45.2	4.54339e-06	0
45.4	4.48763e-06	0
45.6	4.4331e-06	0
45.8	4.37399e-06	0
46	4.31372e-06	0
46.2	4.2539e-06	0
46.4	4.19535e-06	0
46.6	4.13422e-06	0
46.8	4.06818e-06	0
47	4.00608e-06	0
47.2	3.9471e-06	0
47.4	3.88884e-06	0
47.6	3.8348e-06	0
47.8	3.77716e-06	0
48	3.71921e-06	0
48.2	3.65935e-06	0
48.4	3.60005e-06	0
48.6	3.53899e-06	0
48.8	3.47727e-06	0
49	3.41521e-06	0
49.2	3.35145e-06	0
49.4	3.28911e-06	0
49.6	3.22592e-06	0
49.8	3.16116e-06	0
50	3.09715e-06	0
50.2	3.03584e-06	0
50.4	2.97562e-06	0
50.6	2.91417e-06	0
50.8	2.85583e-06	0
51	2.79529e-06	0
51.2	2.73643e-06	0
51.4	2.67326e-06	0
51.6	2.61013e-06	0
51.8	2.55033e-06	0
52	2.48964e-06	0
52.2	2.42917e-06	0
52.4	2.36545e-06	0
52.6	2.30802e-06	0
52.8	2.24865e-06	0
53	2.19351e-06	0
53.2	2.14026e-06	0
53.4	2.08333e-06	0
53.6	2.02456e-06	0
53.8	1.96277e-06	0
54	1.90246e-06	0
54.2	1.84348e-06	0
54.4	1.78524e-06	0
54.6	1.73113e-06	0
54.8	1.67588e-06	0
55	1.62362e-06	0
55.2	1.57067e-06	0
55.4	1.51637e-06	0
55.6	1.46004e-06	0
55.8	1.40377e-06	0
56	1.3488e-06	0
56.2	1.29743e-06	0
56.4	1.24594e-06	0
56.6	1.19657e-06	0
56.8	1.14879e-06	0
57	1.10519e-06	0
57.2	1.05984e-06	0
57.4	1.01508e-06	0
57.6	9.70016e-07	0
57.8	9.25836e-07	0
58	8.81761e-07	0
58.2	8.40976e-07	0
58.4	8.05832e-07	0
58.6	7.71961e-07	0
58.8	7.46885e-07	0
59	7.369e-07	0
59.2	7.21642e-07	0
59.4	6.98691e-07	0
59.6	6.75766e-07	0
59.8	6.54249e-07	0
60	6.50409e-07	0
60.2	6.33577e-07	0
60.4	6.25942e-07	0
60.6	6.11498e-07	0
60.8	6.04544e-07	0
61	5.93584e-07	0
61.2	5.6267e-07	0
61.4	5.33798e-07	0
61.6	4.83329e-07	0
61.8	4.18379e-07	0
62	3.40783e-07	0
62.2	2.5353e-07	0
62.4	1.76356e-07	0
62.6	1.01518e-07	0
62.8	7.5968e-08	0
63	5.36061e-08	0
63.2	3.65619e-08	0
63.4	2.27382e-08	0
63.6	1.36549e-08	0
63.8	1.16076e-08	0
64	1.08927e-08	0
64.2	1.05383e-08	0
64.4	1.05334e-08	0
64.6	1.05054e-08	0
64.8	9.89194e-09	0
65	8.66654e-09	0
65.2	6.90387e-09	0
65.4	1.99504e-09	0
65.6	1.7973e-09	0
65.8	1.79618e-09	0
66	1.79618e-09	0
66.2	1.79618e-09	0
66.4	1.79618e-09	0
66.6	1.79618e-09	0
66.8	1.79618e-09	0
67	1.79618e-09	0
67.2	1.79618e-09	0
67.4	1.79618e-09	0
67.6	1.79618e-09	0
67.8	1.79618e-09	0
68	1.79618e-09	0
68.2	1.79618e-09	0
68.4	1.79618e-09	0
68.6	1.79618e-09	0
68.8	1.79618e-09	0
69	1.79618e-09	0
69.2	1.79618e-09	0
69.4	1.79618e-09	0
69.6	1.79618e-09	0
69.8	1.79618e-09	0
70	1.79618e-09	0
70.2	1.79618e-09	0
70.4	1.79618e-09	0
70.6	1.79618e-09	0
70.8	1.79618e-09	0
71	1.79617e-09	0
71.2	1.79611e-09	0
71.4	1.79587e-09	0
71.6	1.79472e-09	0
71.8	1.79439e-09	0
72	1.7938e-09	0
72.2	1.79219e-09	0
72.4	1.78732e-09	0
72.6	1.77741e-09	0
72.8	1.74615e-09	0
73	1.69172e-09	0
73.2	1.6618e-09	0
73.4	1.517e-09	0
73.6	1.19964e-09	0
73.8	7.27407e-10	0
74	3.49808e-10	0
74.2	3.49442e-10	0
74.4	3.48238e-10	0
74.6	3.43334e-10	0
74.8	3.36084e-10	0
75	3.22761e-10	0
75.2	3.17249e-10	0
75.4	2.70451e-10	0
75.6	3.77782e-11	0
75.8	9.18956e-14	0
76	9.17721e-14	0
76.2	2.37209e-16	0
76.4	1.96601e-16	0
76.6	3.17406e-19	0
76.8	2.88073e-19	0
77	4.31972e-21	0
77.2	3.88021e-21	0
77.4	1.71587e-21	0
77.6	1.46325e-21	0
77.8	1.20025e-21	0
78	9.80302e-22	0
78.2	7.55091e-22	0
78.4	5.61625e-22	0
78.6	3.64084e-22	0

## Sheet: profiles
depth	CO2	CH4	SF6	d15N2
0	382.39	1837.16	6.647	1
0.2	382.568	1837.57	6.6422	1
0.4	382.743	1837.98	6.63734	1
0.6	382.914	1838.38	6.63244	1
0.8	383.081	1838.78	6.62748	1
1	383.244	1839.17	6.62248	1
1.2	383.403	1839.56	6.61744	1
1.4	383.558	1839.94	6.61236	1
1.6	383.708	1840.32	6.60725	1
1.8	383.855	1840.69	6.60211	1
2	383.997	1841.06	6.59695	1
2.2	384.135	1841.42	6.59177	1
2.4	384.268	1841.78	6.58656	1
2.6	384.397	1842.13	6.58134	1
2.8	384.522	1842.47	6.57611	1
3	384.643	1842.81	6.57086	1
3.2	384.76	1843.15	6.5656	1
3.4	384.872	1843.48	6.56033	1
3.6	384.981	1843.8	6.55505	1
3.8	385.085	1844.12	6.54977	1
4	385.186	1844.43	6.54448	1
4.2	385.283	1844.73	6.53918	1
4.4	385.375	1845.03	6.53387	1
4.6	385.465	1845.33	6.52856	1
4.8	385.55	1845.62	6.52325	1
5	385.632	1845.9	6.51793	1.00001
5.2	385.71	1846.18	6.51261	1.00001
5.4	385.784	1846.45	6.50729	1.00001
5.6	385.856	1846.72	6.50196	1.00001
5.8	385.924	1846.98	6.49664	1.00001
6	385.988	1847.24	6.4913	1.00001
6.2	386.049	1847.5	6.48597	1.00001
6.4	386.108	1847.74	6.48063	1.00001
6.6	386.163	1847.99	6.47529	1.00001
6.8	386.215	1848.22	6.46995	1.00001
7	386.264	1848.46	6.46461	1.00001
7.2	386.31	1848.68	6.45926	1.00002
7.4	386.353	1848.91	6.45391	1.00002
7.6	386.394	1849.12	6.44857	1.00002
7.8	386.431	1849.34	6.44322	1.00002
8	386.466	1849.55	6.43787	1.00002
8.2	386.499	1849.75	6.43251	1.00002
8.4	386.529	1849.95	6.42715	1.00002
8.6	386.556	1850.14	6.42178	1.00002
8.8	386.581	1850.33	6.41641	1.00002
9	386.603	1850.52	6.41102	1.00002
9.2	386.624	1850.7	6.40562	1.00003
9.4	386.642	1850.88	6.4002	1.00003
9.6	386.657	1851.06	6.39477	1.00003
9.8	386.671	1851.23	6.38932	1.00003
10	386.683	1851.39	6.38384	1.00003
10.2	386.692	1851.55	6.37835	1.00003
10.4	386.699	1851.71	6.37283	1.00003
10.6	386.705	1851.87	6.36729	1.00003
10.8	386.708	1852.02	6.36172	1.00003
11	386.709	1852.17	6.35611	1.00003
11.2	386.709	1852.31	6.35046	1.00004
11.4	386.706	1852.45	6.34477	1.00004
11.6	386.702	1852.59	6.33905	1.00004
11.8	386.696	1852.72	6.33328	1.00004
12	386.689	1852.85	6.32744	1.00004
12.2	386.679	1852.98	6.32151	1.00004
12.4	386.668	1853.1	6.31549	1.00004
12.6	386.655	1853.23	6.30938	1.00004
12.8	386.64	1853.35	6.30318	1.00004
13	386.623	1853.46	6.29688	1.00004
13.2	386.605	1853.58	6.29047	1.00004
13.4	386.585	1853.69	6.28397	1.00005
13.6	386.564	1853.79	6.27736	1.00005
13.8	386.54	1853.9	6.27065	1.00005
14	386.515	1854	6.26382	1.00005
14.2	386.489	1854.1	6.25688	1.00005
14.4	386.461	1854.2	6.24984	1.00005
14.6	386.431	1854.29	6.2427	1.00005
14.8	386.399	1854.38	6.23544	1.00005
15	386.367	1854.47	6.22809	1.00005
15.2	386.332	1854.55	6.22063	1.00005
15.4	386.296	1854.63	6.21306	1.00006
15.6	386.259	1854.71	6.20541	1.00006
15.8	386.221	1854.79	6.19767	1.00006
16	386.181	1854.86	6.1899	1.00006
16.2	386.14	1854.93	6.18208	1.00006
16.4	386.098	1854.99	6.17425	1.00006
16.6	386.055	1855.06	6.16641	1.00006
16.8	386.011	1855.12	6.15857	1.00006
17	385.966	1855.17	6.15072	1.00006
17.2	385.92	1855.23	6.14288	1.00006
17.4	385.873	1855.28	6.13504	1.00006
17.6	385.825	1855.32	6.12721	1.00007
17.8	385.777	1855.37	6.11939	1.00007
18	385.728	1855.41	6.11158	1.00007
18.2	385.678	1855.45	6.10378	1.00007
18.4	385.628	1855.48	6.09599	1.00007
18.6	385.577	1855.52	6.0882	1.00007
18.8	385.525	1855.55	6.08043	1.00007
19	385.473	1855.57	6.07266	1.00007
19.2	385.42	1855.6	6.0649	1.00007
19.4	385.367	1855.62	6.05714	1.00007
19.6	385.313	1855.64	6.04939	1.00008
19.8	385.258	1855.66	6.04164	1.00008
20	385.204	1855.68	6.03389	1.00008
20.2	385.149	1855.69	6.02616	1.00008
20.4	385.093	1855.7	6.01843	1.00008
20.6	385.037	1855.71	6.0107	1.00008
20.8	384.981	1855.71	6.00298	1.00008
21	384.924	1855.72	5.99526	1.00008
21.2	384.867	1855.72	5.98755	1.00008
21.4	384.81	1855.72	5.97983	1.00008
21.6	384.753	1855.71	5.97213	1.00009
21.8	384.695	1855.71	5.96443	1.00009
22	384.637	1855.7	5.95674	1.00009
22.2	384.579	1855.7	5.94905	1.00009
22.4	384.521	1855.68	5.94138	1.00009
22.6	384.462	1855.67	5.93371	1.00009
22.8	384.404	1855.66	5.92604	1.00009
23	384.345	1855.64	5.91838	1.00009
23.2	384.287	1855.62	5.91073	1.00009
23.4	384.228	1855.6	5.90309	1.00009
23.6	384.169	1855.58	5.89546	1.00009
23.8	384.11	1855.56	5.88783	1.0001
24	384.052	1855.54	5.88021	1.0001
24.2	383.993	1855.51	5.8726	1.0001
24.4	383.934	1855.48	5.865	1.0001
24.6	383.875	1855.45	5.8574	1.0001
24.8	383.816	1855.42	5.8498	1.0001
25	383.758	1855.39	5.84222	1.0001
25.2	383.699	1855.36	5.83464	1.0001
25.4	383.641	1855.32	5.82708	1.0001
25.6	383.582	1855.29	5.81952	1.0001
25.8	383.524	1855.25	5.81198	1.00011
26	383.466	1855.21	5.80444	1.00011
26.2	383.408	1855.17	5.79691	1.00011
26.4	383.35	1855.13	5.78938	1.00011
26.6	383.292	1855.09	5.78185	1.00011
26.8	383.234	1855.04	5.77434	1.00011
27	383.176	1855	5.76682	1.00011
27.2	383.119	1854.95	5.75932	1.00011
27.4	383.062	1854.91	5.75182	1.00011
27.6	383.005	1854.86	5.74433	1.00011
27.8	382.948	1854.81	5.73685	1.00011
28	382.891	1854.76	5.72937	1.00012
28.2	382.835	1854.71	5.7219	1.00012
28.4	382.778	1854.66	5.71444	1.00012
28.6	382.722	1854.6	5.70697	1.00012
28.8	382.666	1854.55	5.69951	1.00012
29	382.611	1854.5	5.69206	1.00012
29.2	382.555	1854.44	5.68461	1.00012
29.4	382.5	1854.39	5.67717	1.00012
29.6	382.445	1854.33	5.66972	1.00012
29.8	382.39	1854.27	5.66228	1.00012
30	382.335	1854.21	5.65485	1.00013
30.2	382.281	1854.15	5.64741	1.00013
30.4	382.227	1854.09	5.63998	1.00013
30.6	382.173	1854.03	5.63254	1.00013
30.8	382.119	1853.97	5.62511	1.00013
31	382.065	1853.91	5.61768	1.00013
31.2	382.012	1853.85	5.61024	1.00013
31.4	381.959	1853.79	5.6028	1.00013
31.6	381.906	1853.72	5.59535	1.00013
31.8	381.853	1853.66	5.5879	1.00013
32	381.801	1853.59	5.58046	1.00013
32.2	381.748	1853.53	5.57301	1.00014
32.4	381.696	1853.46	5.56557	1.00014
32.6	381.644	1853.4	5.55812	1.00014
32.8	381.593	1853.33	5.55067	1.00014
33	381.541	1853.26	5.54323	1.00014
33.2	381.49	1853.2	5.53578	1.00014
33.4	381.44	1853.13	5.52833	1.00014
33.6	381.389	1853.06	5.52087	1.00014
33.8	381.338	1852.99	5.5134	1.00014
34	381.288	1852.92	5.50593	1.00014
34.2	381.238	1852.85	5.49845	1.00015
34.4	381.188	1852.78	5.49096	1.00015
34.6	381.138	1852.71	5.48346	1.00015
34.8	381.089	1852.64	5.47595	1.00015
35	381.039	1852.57	5.46842	1.00015
35.2	380.99	1852.5	5.46087	1.00015
35.4	380.941	1852.43	5.45331	1.00015
35.6	380.892	1852.35	5.44574	1.00015
35.8	380.843	1852.28	5.43815	1.00015
36	380.794	1852.21	5.43054	1.00015
36.2	380.745	1852.14	5.42292	1.00016
36.4	380.697	1852.06	5.41528	1.00016
36.6	380.648	1851.99	5.40763	1.00016
36.8	380.6	1851.91	5.39997	1.00016
37	380.552	1851.84	5.39229	1.00016
37.2	380.504	1851.77	5.3846	1.00016
37.4	380.457	1851.69	5.3769	1.00016
37.6	380.409	1851.62	5.3692	1.00016
37.8	380.362	1851.54	5.36148	1.00016
38	380.315	1851.47	5.35376	1.00016
38.2	380.268	1851.39	5.34603	1.00016
38.4	380.221	1851.32	5.33829	1.00017
38.6	380.174	1851.24	5.33054	1.00017
38.8	380.128	1851.17	5.32278	1.00017
39	380.081	1851.09	5.31501	1.00017
39.2	380.035	1851.01	5.30723	1.00017
39.4	379.989	1850.94	5.29943	1.00017
39.6	379.943	1850.86	5.29162	1.00017
39.8	379.897	1850.79	5.28379	1.00017
40	379.851	1850.71	5.27595	1.00017
40.2	379.805	1850.64	5.26809	1.00017
40.4	379.76	1850.56	5.26021	1.00018
40.6	379.714	1850.49	5.25232	1.00018
40.8	379.669	1850.41	5.24442	1.00018
41	379.623	1850.33	5.2365	1.00018
41.2	379.578	1850.26	5.22857	1.00018
41.4	379.533	1850.18	5.22062	1.00018
41.6	379.488	1850.11	5.21265	1.00018
41.8	379.443	1850.03	5.20467	1.00018
42	379.398	1849.96	5.19669	1.00018
42.2	379.353	1849.88	5.18869	1.00018
42.4	379.309	1849.81	5.18069	1.00018
42.6	379.264	1849.73	5.17267	1.00019
42.8	379.219	1849.66	5.16464	1.00019
43	379.175	1849.58	5.15659	1.00019
43.2	379.13	1849.51	5.14851	1.00019
43.4	379.086	1849.43	5.14042	1.00019
43.6	379.041	1849.36	5.1323	1.00019
43.8	378.997	1849.28	5.12417	1.00019
44	378.952	1849.21	5.11601	1.00019
44.2	378.908	1849.13	5.10784	1.00019
44.4	378.863	1849.06	5.09965	1.00019
44.6	378.819	1848.99	5.09144	1.0002
44.8	378.774	1848.91	5.0832	1.0002
45	378.729	1848.84	5.07495	1.0002
45.2	378.685	1848.76	5.06666	1.0002
45.4	378.64	1848.69	5.05834	1.0002
45.6	378.595	1848.62	5.05	1.0002
45.8	378.55	1848.54	5.04161	1.0002
46	378.505	1848.47	5.03319	1.0002
46.2	378.46	1848.4	5.02473	1.0002
46.4	378.414	1848.32	5.01624	1.0002
46.6	378.369	1848.25	5.00769	1.0002
46.8	378.323	1848.17	4.99909	1.00021
47	378.277	1848.1	4.99045	1.00021
47.2	378.23	1848.03	4.98176	1.00021
47.4	378.184	1847.95	4.97302	1.00021
47.6	378.137	1847.88	4.96425	1.00021
47.8	378.09	1847.8	4.95544	1.00021
48	378.043	1847.73	4.94658	1.00021
48.2	377.995	1847.66	4.93767	1.00021
48.4	377.948	1847.58	4.92871	1.00021
48.6	377.9	1847.51	4.91969	1.00021
48.8	377.851	1847.43	4.91061	1.00022
49	377.803	1847.36	4.90147	1.00022
49.2	377.753	1847.29	4.89225	1.00022
49.4	377.704	1847.21	4.88297	1.00022
49.6	377.654	1847.14	4.87361	1.00022
49.8	377.604	1847.06	4.86417	1.00022
50	377.553	1846.98	4.85465	1.00022
50.2	377.501	1846.91	4.84505	1.00022
50.4	377.449	1846.83	4.83537	1.00022
50.6	377.397	1846.76	4.82561	1.00022
50.8	377.344	1846.68	4.81577	1.00022
51	377.29	1846.6	4.80585	1.00023
51.2	377.236	1846.52	4.79584	1.00023
51.4	377.182	1846.45	4.78573	1.00023
51.6	377.126	1846.37	4.77551	1.00023
51.8	377.07	1846.29	4.76519	1.00023
52	377.014	1846.21	4.75476	1.00023
52.2	376.956	1846.13	4.74422	1.00023
52.4	376.898	1846.05	4.73355	1.00023
52.6	376.839	1845.97	4.72277	1.00023
52.8	376.779	1845.89	4.71186	1.00023
53	376.718	1845.8	4.70085	1.00024
53.2	376.657	1845.72	4.68972	1.00024
53.4	376.594	1845.64	4.67847	1.00024
53.6	376.531	1845.55	4.66707	1.00024
53.8	376.466	1845.46	4.6555	1.00024
54	376.401	1845.38	4.64376	1.00024
54.2	376.334	1845.29	4.63184	1.00024
54.4	376.266	1845.2	4.61973	1.00024
54.6	376.196	1845.11	4.60747	1.00024
54.8	376.126	1845.02	4.59501	1.00024
55	376.054	1844.92	4.58239	1.00024
55.2	375.981	1844.83	4.56957	1.00025
55.4	375.906	1844.73	4.55654	1.00025
55.6	375.83	1844.63	4.54327	1.00025
55.8	375.751	1844.53	4.52973	1.00025
56	375.671	1844.43	4.51592	1.00025
56.2	375.589	1844.32	4.50185	1.00025
56.4	375.505	1844.22	4.4875	1.00025
56.6	375.42	1844.1	4.47288	1.00025
56.8	375.332	1843.99	4.45798	1.00025
57	375.242	1843.88	4.44283	1.00025
57.2	375.15	1843.76	4.42739	1.00025
57.4	375.056	1843.64	4.41164	1.00026
57.6	374.959	1843.51	4.39555	1.00026
57.8	374.86	1843.38	4.37911	1.00026
58	374.757	1843.25	4.36229	1.00026
58.2	374.652	1843.11	4.34509	1.00026
58.4	374.545	1842.97	4.32762	1.00026
58.6	374.435	1842.82	4.30988	1.00026
58.8	374.325	1842.68	4.29204	1.00026
59	374.215	1842.53	4.27446	1.00026
59.2	374.105	1842.38	4.25703	1.00026
59.4	373.994	1842.23	4.23957	1.00027
59.6	373.883	1842.07	4.22208	1.00027
59.8	373.77	1841.91	4.20459	1.00027
60	373.66	1841.76	4.18759	1.00027
60.2	373.55	1841.6	4.17074	1.00027
60.4	373.442	1841.44	4.15429	1.00027
60.6	373.334	1841.28	4.13808	1.00027
60.8	373.228	1841.12	4.12233	1.00027
61	373.123	1840.95	4.10694	1.00027
61.2	373.017	1840.79	4.09141	1.00027
61.4	372.908	1840.61	4.07579	1.00027
61.6	372.793	1840.42	4.0594	1.00028
61.8	372.666	1840.21	4.04159	1.00028
62	372.521	1839.97	4.02136	1.00028
62.2	372.347	1839.67	3.99701	1.00028
62.4	372.13	1839.3	3.96652	1.00028
62.6	371.837	1838.79	3.9245	1.00028
62.8	371.484	1838.16	3.87468	1.00028
63	371.044	1837.35	3.8133	1.00028
63.2	370.483	1836.27	3.73614	1.00028
63.4	369.725	1834.75	3.63295	1.00028
63.6	368.672	1832.53	3.49039	1.00028
63.8	367.53	1829.96	3.33628	1.00028
64	366.402	1827.26	3.1838	1.00028
64.2	365.324	1824.51	3.03834	1.00028
64.4	364.341	1821.82	2.90632	1.00028
64.6	363.459	1819.24	2.78954	1.00029
64.8	362.635	1816.63	2.68375	1.00029
65	361.828	1813.86	2.5851	1.00029
65.2	360.984	1810.65	2.48991	1.00029
65.4	359.404	1804.25	2.32008	1.00029
65.6	357.74	1796.72	2.14658	1.00029
65.8	356.116	1788.57	1.98126	1.00029
66	354.53	1779.82	1.82441	1.00029
66.2	352.977	1770.47	1.67614	1.00029
66.4	351.454	1760.54	1.53647	1.00029
66.6	349.959	1750.03	1.40533	1.00029
66.8	348.489	1738.97	1.28256	1.00029
67	347.043	1727.38	1.16795	1.00029
67.2	345.62	1715.3	1.06125	1.00029
67.4	344.219	1702.75	0.962177	1.00029
67.6	342.841	1689.78	0.870427	1.00029
67.8	341.487	1676.43	0.785681	1.00029
68	340.157	1662.76	0.70761	1.00029
68.2	338.853	1648.82	0.635883	1.00029
68.4	337.577	1634.65	0.570161	1.00029
68.6	336.33	1620.32	0.510108	1.00029
68.8	335.114	1605.87	0.455384	1.00029
69	333.929	1591.34	0.405652	1.00029
69.2	332.778	1576.79	0.36058	1.00029
69.4	331.66	1562.27	0.319837	1.00029
69.6	330.577	1547.8	0.283104	1.00029
69.8	329.528	1533.42	0.250067	1.00029
70	328.514	1519.17	0.220425	1.00029
70.2	327.534	1505.08	0.193891	1.00029
70.4	326.589	1491.16	0.170192	1.00029
70.6	325.678	1477.45	0.149069	1.00029
70.8	324.8	1463.95	0.130281	1.00029
71	323.956	1450.68	0.113606	1.00029
71.2	323.144	1437.67	0.0988351	1.00029
71.4	322.364	1424.91	0.0857802	1.00029
71.6	321.614	1412.43	0.0742603	1.00029
71.8	320.896	1400.24	0.064121	1.00029
72	320.208	1388.37	0.0552195	1.00029
72.2	319.55	1376.85	0.0474282	1.00029
72.4	318.924	1365.73	0.0406304	1.00029
72.6	318.331	1355.08	0.0347358	1.00029
72.8	317.77	1344.89	0.0296256	1.00029
73	317.238	1335.21	0.0251625	1.00029
73.2	316.759	1326.49	0.0214238	1.00029
73.4	316.331	1318.64	0.0183077	1.00029
73.6	315.937	1311.3	0.0156722	1.00029
73.8	315.543	1303.6	0.0133394	1.00029
74	315.048	1293.36	0.0109192	1.00029
74.2	314.574	1283.41	0.00888918	1.00029
74.4	314.123	1273.77	0.00719881	1.00029
74.6	313.691	1264.41	0.0057973	1.00029
74.8	313.284	1255.4	0.00464252	1.00029
75	312.884	1246.55	0.00370006	1.00029
75.2	312.519	1238.1	0.00291254	1.00029
75.4	312.158	1230.88	0.00234877	1.00029
75.6	311.946	1224.95	0.00183397	1.00029
75.8	311.454	1214.63	0.00141216	1.00029
76	311.279	1209.17	0.00107982	1.00029
76.2	310.799	1199.1	0.000819871	1.00029
76.4	310.66	1194.37	0.000618123	1.00029
76.6	310.188	1184.49	0.000462655	1.00029
76.8	310.082	1180.51	0.000343852	1.00029
77	309.613	1170.73	0.00025357	1.00029
77.2	309.535	1167.5	0.000185777	1.00029
77.4	309.064	1157.73	0.00013476	1.00029
77.6	309.011	1155.28	9.74745e-05	1.00029
77.8	308.533	1145.42	6.91366e-05	1.00029
78	308.501	1143.76	4.98625e-05	1.00029
78.2	308.011	1133.68	3.36842e-05	1.00029
78.4	307.998	1132.87	2.54814e-05	1.00029
78.6	307.488	1122.39	1.44018e-05	1.00029
				1.00029

## Sheet: scenarios
depth	SCEN1	SCEN2	SCEN3	SCEN4
0	-5.42101e-17	1	1	0
0.2	-8.05155e-05	0.998253	1	5.09601
0.4	-0.000161036	0.996496	1	10.1711
0.6	-0.000322084	0.994733	1	15.2221
0.8	-0.000402619	0.992962	1	20.2488
1	-0.000483159	0.991187	1	25.2513
1.2	-0.000644234	0.989407	1	30.2297
1.4	-0.000724788	0.987623	1	35.1838
1.6	-0.000805348	0.985837	1	40.1137
1.8	-0.000966451	0.984049	1	45.0195
2	-0.00104703	0.982261	1	49.901
2.2	-0.00120815	0.980472	1	54.7584
2.4	-0.00128874	0.978684	1	59.5915
2.6	-0.00136933	0.976896	1	64.4005
2.8	-0.00153048	0.975109	1	69.1852
3	-0.00161109	0.973324	1	73.9458
3.2	-0.0016917	0.97154	1	78.6822
3.4	-0.00185288	0.969758	1	83.3944
3.6	-0.00193351	0.967978	1	88.0824
3.8	-0.00201414	0.9662	1	92.7463
4	-0.00209478	0.964425	1	97.3859
4.2	-0.00233657	0.962651	1	102.001
4.4	-0.00241723	0.96088	1	106.593
4.6	-0.00249789	0.959112	1	111.16
4.8	-0.00257856	0.957345	1	115.703
5	-0.00265923	0.955581	1	120.222
5.2	-0.00282049	0.953819	1.00001	124.717
5.4	-0.00298177	0.95206	1.00001	129.187
5.6	-0.00306246	0.950303	1.00001	133.634
5.8	-0.00322376	0.948547	1.00001	138.056
6	-0.00330447	0.946794	1.00001	142.454
6.2	-0.00338518	0.945043	1.00001	146.829
6.4	-0.00346591	0.943293	1.00001	151.179
6.6	-0.00362724	0.941545	1.00001	155.505
6.8	-0.00370797	0.9398	1.00001	159.807
7	-0.00386932	0.938056	1.00001	164.085
7.2	-0.00395007	0.936313	1.00001	168.339
7.4	-0.00403083	0.934572	1.00001	172.569
7.6	-0.00419221	0.932833	1.00001	176.775
7.8	-0.00427298	0.931096	1.00002	180.957
8	-0.00443438	0.929359	1.00002	185.115
8.2	-0.00451516	0.927624	1.00002	189.249
8.4	-0.00459595	0.925888	1.00002	193.36
8.6	-0.00475738	0.924154	1.00002	197.447
8.8	-0.00483818	0.922418	1.00002	201.509
9	-0.00499963	0.920682	1.00002	205.549
9.2	-0.00508045	0.918944	1.00002	209.564
9.4	-0.00524192	0.917204	1.00002	213.556
9.6	-0.00532276	0.915462	1.00002	217.524
9.8	-0.0054036	0.913717	1.00002	221.469
10	-0.0055651	0.91197	1.00002	225.39
10.2	-0.00572661	0.910219	1.00003	229.289
10.4	-0.00572682	0.908465	1.00003	233.163
10.6	-0.00596901	0.906706	1.00003	237.015
10.8	-0.00604989	0.904943	1.00003	240.843
11	-0.00613078	0.903172	1.00003	244.649
11.2	-0.00629234	0.901396	1.00003	248.431
11.4	-0.00637325	0.899614	1.00003	252.191
11.6	-0.00653484	0.897825	1.00003	255.928
11.8	-0.00661576	0.89603	1.00003	259.643
12	-0.00677737	0.89422	1.00003	263.335
12.2	-0.00685832	0.892396	1.00003	267.006
12.4	-0.00701996	0.890556	1.00003	270.654
12.6	-0.00718161	0.8887	1.00004	274.281
12.8	-0.00726259	0.886828	1.00004	277.886
13	-0.00750497	0.884941	1.00004	281.47
13.2	-0.00758597	0.883038	1.00004	285.033
13.4	-0.00774768	0.881119	1.00004	288.575
13.6	-0.00782871	0.879185	1.00004	292.097
13.8	-0.00807116	0.877235	1.00004	295.6
14	-0.00823293	0.87527	1.00004	299.082
14.2	-0.00839471	0.873289	1.00004	302.545
14.4	-0.0085565	0.871294	1.00004	305.99
14.6	-0.00871832	0.869287	1.00004	309.416
14.8	-0.00888015	0.867267	1.00004	312.824
15	-0.009042	0.865234	1.00005	316.216
15.2	-0.0092846	0.863191	1.00005	319.591
15.4	-0.00936575	0.861138	1.00005	322.951
15.6	-0.00960839	0.859076	1.00005	326.295
15.8	-0.00977032	0.857009	1.00005	329.625
16	-0.010013	0.854942	1.00005	332.942
16.2	-0.010175	0.852877	1.00005	336.248
16.4	-0.0103369	0.850813	1.00005	339.54
16.6	-0.0104989	0.848752	1.00005	342.821
16.8	-0.0106609	0.846693	1.00005	346.089
17	-0.0109037	0.844637	1.00005	349.346
17.2	-0.0110657	0.842586	1.00005	352.59
17.4	-0.0113086	0.840538	1.00005	355.822
17.6	-0.0114706	0.838497	1.00006	359.042
17.8	-0.0117135	0.836461	1.00006	362.251
18	-0.0117948	0.834432	1.00006	365.447
18.2	-0.0120377	0.832408	1.00006	368.632
18.4	-0.0122806	0.830391	1.00006	371.804
18.6	-0.0124428	0.828379	1.00006	374.965
18.8	-0.012605	0.826372	1.00006	378.113
19	-0.0128479	0.824371	1.00006	381.25
19.2	-0.0130101	0.822375	1.00006	384.375
19.4	-0.0131724	0.820383	1.00006	387.488
19.6	-0.0134154	0.818396	1.00006	390.589
19.8	-0.0135776	0.816413	1.00006	393.679
20	-0.0138207	0.814436	1.00006	396.757
20.2	-0.0139022	0.812463	1.00007	399.823
20.4	-0.0141453	0.810496	1.00007	402.878
20.6	-0.0143885	0.808533	1.00007	405.921
20.8	-0.0145508	0.806575	1.00007	408.952
21	-0.0147131	0.804621	1.00007	411.972
21.2	-0.0149563	0.802671	1.00007	414.98
21.4	-0.0151187	0.800726	1.00007	417.976
21.6	-0.0152811	0.798786	1.00007	420.961
21.8	-0.0154435	0.796851	1.00007	423.935
22	-0.0156868	0.794921	1.00007	426.897
22.2	-0.0159301	0.792997	1.00007	429.848
22.4	-0.0160117	0.791079	1.00007	432.786
22.6	-0.016255	0.789165	1.00007	435.715
22.8	-0.0164175	0.787256	1.00008	438.631
23	-0.0166609	0.785353	1.00008	441.536
23.2	-0.0168234	0.783455	1.00008	444.429
23.4	-0.016986	0.781563	1.00008	447.312
23.6	-0.0171485	0.779676	1.00008	450.183
23.8	-0.017392	0.777795	1.00008	453.043
24	-0.0175546	0.775919	1.00008	455.892
24.2	-0.0177981	0.774048	1.00008	458.729
24.4	-0.0179607	0.772183	1.00008	461.555
24.6	-0.0181234	0.770323	1.00008	464.371
24.8	-0.0183669	0.768468	1.00008	467.174
25	-0.0185296	0.766618	1.00008	469.968
25.2	-0.0187732	0.764774	1.00008	472.749
25.4	-0.0189359	0.762936	1.00009	475.52
25.6	-0.0190986	0.761104	1.00009	478.28
25.8	-0.0193423	0.759278	1.00009	481.029
26	-0.019505	0.757457	1.00009	483.766
26.2	-0.0196678	0.755641	1.00009	486.493
26.4	-0.0199115	0.75383	1.00009	489.209
26.6	-0.0200743	0.752023	1.00009	491.914
26.8	-0.0202372	0.750221	1.00009	494.608
27	-0.0204809	0.748424	1.00009	497.292
27.2	-0.0206438	0.746632	1.00009	499.964
27.4	-0.0208876	0.744845	1.00009	502.626
27.6	-0.0209695	0.743064	1.00009	505.276
27.8	-0.0211324	0.741288	1.00009	507.917
28	-0.0213763	0.739517	1.0001	510.546
28.2	-0.0216202	0.737751	1.0001	513.165
28.4	-0.0217022	0.735989	1.0001	515.772
28.6	-0.0219462	0.734232	1.0001	518.37
28.8	-0.0221901	0.732478	1.0001	520.956
29	-0.0223531	0.730729	1.0001	523.533
29.2	-0.0225971	0.728985	1.0001	526.098
29.4	-0.0227602	0.727246	1.0001	528.653
29.6	-0.0228422	0.72551	1.0001	531.197
29.8	-0.0230863	0.723778	1.0001	533.732
30	-0.0232494	0.72205	1.0001	536.255
30.2	-0.0234125	0.720326	1.0001	538.768
30.4	-0.0236566	0.718606	1.0001	541.27
30.6	-0.0238198	0.71689	1.00011	543.763
30.8	-0.0240639	0.715177	1.00011	546.244
31	-0.0242271	0.713467	1.00011	548.716
31.2	-0.0243903	0.71176	1.00011	551.177
31.4	-0.0246345	0.710054	1.00011	553.628
31.6	-0.0247978	0.708352	1.00011	556.068
31.8	-0.024961	0.706653	1.00011	558.499
32	-0.0252053	0.704958	1.00011	560.919
32.2	-0.0254497	0.703265	1.00011	563.329
32.4	-0.025613	0.701576	1.00011	565.728
32.6	-0.0257763	0.69989	1.00011	568.119
32.8	-0.0259396	0.698208	1.00011	570.497
33	-0.026184	0.69653	1.00011	572.867
33.2	-0.0263474	0.694854	1.00012	575.226
33.4	-0.0265919	0.693181	1.00012	577.576
33.6	-0.0267553	0.69151	1.00012	579.914
33.8	-0.0269187	0.68984	1.00012	582.244
34	-0.0270822	0.688173	1.00012	584.563
34.2	-0.0273267	0.686508	1.00012	586.873
34.4	-0.0274902	0.684843	1.00012	589.171
34.6	-0.0277348	0.68318	1.00012	591.462
34.8	-0.0278984	0.681517	1.00012	593.74
35	-0.0280619	0.679853	1.00012	596.011
35.2	-0.0283066	0.678191	1.00012	598.27
35.4	-0.0284702	0.676529	1.00012	600.521
35.6	-0.0287149	0.674867	1.00012	602.761
35.8	-0.0288786	0.673205	1.00012	604.992
36	-0.0290422	0.671544	1.00013	607.212
36.2	-0.029287	0.669883	1.00013	609.424
36.4	-0.0294507	0.668222	1.00013	611.625
36.6	-0.0296956	0.666562	1.00013	613.818
36.8	-0.0298594	0.664903	1.00013	615.999
37	-0.0300231	0.663246	1.00013	618.173
37.2	-0.0301869	0.661589	1.00013	620.335
37.4	-0.0305131	0.659934	1.00013	622.489
37.6	-0.0305957	0.658281	1.00013	624.633
37.8	-0.0308408	0.65663	1.00013	626.768
38	-0.0310046	0.654981	1.00013	628.892
38.2	-0.0312497	0.653335	1.00013	631.009
38.4	-0.0314948	0.65169	1.00013	633.114
38.6	-0.0316588	0.650048	1.00014	635.212
38.8	-0.0318227	0.648407	1.00014	637.299
39	-0.0320679	0.646767	1.00014	639.378
39.2	-0.0323131	0.645128	1.00014	641.446
39.4	-0.032396	0.64349	1.00014	643.506
39.6	-0.0327224	0.641853	1.00014	645.555
39.8	-0.0328865	0.640216	1.00014	647.598
40	-0.0331318	0.63858	1.00014	649.628
40.2	-0.0332148	0.636945	1.00014	651.653
40.4	-0.0334601	0.635309	1.00014	653.665
40.6	-0.0337055	0.633674	1.00014	655.671
40.8	-0.033951	0.632041	1.00014	657.665
41	-0.0341152	0.630409	1.00014	659.652
41.2	-0.0342795	0.628778	1.00014	661.628
41.4	-0.034525	0.627146	1.00015	663.598
41.6	-0.0346893	0.625515	1.00015	665.555
41.8	-0.0349349	0.623884	1.00015	667.507
42	-0.0351805	0.622258	1.00015	669.447
42.2	-0.0353449	0.620633	1.00015	671.381
42.4	-0.0355906	0.619009	1.00015	673.302
42.6	-0.035755	0.617387	1.00015	675.219
42.8	-0.0359195	0.615764	1.00015	677.123
43	-0.0362465	0.614141	1.00015	679.021
43.2	-0.036411	0.612518	1.00015	680.908
43.4	-0.0365756	0.610893	1.00015	682.789
43.6	-0.0368214	0.609269	1.00015	684.658
43.8	-0.0370673	0.607645	1.00015	686.522
44	-0.037232	0.606019	1.00015	688.373
44.2	-0.0374779	0.604394	1.00016	690.22
44.4	-0.0376426	0.602768	1.00016	692.054
44.6	-0.0378887	0.601141	1.00016	693.883
44.8	-0.0380534	0.599514	1.00016	695.7
45	-0.0382995	0.597885	1.00016	697.512
45.2	-0.0385456	0.596254	1.00016	699.311
45.4	-0.0387918	0.59462	1.00016	701.107
45.6	-0.0389567	0.592984	1.00016	702.889
45.8	-0.0391216	0.591344	1.00016	704.668
46	-0.0393679	0.5897	1.00016	706.433
46.2	-0.0396142	0.588051	1.00016	708.195
46.4	-0.0397792	0.586399	1.00016	709.944
46.6	-0.040107	0.584741	1.00016	711.689
46.8	-0.0402721	0.583075	1.00016	713.421
47	-0.0405186	0.581404	1.00017	715.15
47.2	-0.0407652	0.579728	1.00017	716.865
47.4	-0.0409304	0.578046	1.00017	718.578
47.6	-0.041177	0.576361	1.00017	720.276
47.8	-0.0414237	0.574672	1.00017	721.973
48	-0.0416704	0.572976	1.00017	723.655
48.2	-0.0418358	0.571274	1.00017	725.335
48.4	-0.0420827	0.569565	1.00017	727
48.6	-0.0423295	0.567849	1.00017	728.664
48.8	-0.0424951	0.566124	1.00017	730.314
49	-0.0428235	0.564391	1.00017	731.962
49.2	-0.0429891	0.562647	1.00017	733.595
49.4	-0.0433176	0.560894	1.00017	735.228
49.6	-0.0434834	0.55913	1.00017	736.845
49.8	-0.043812	0.557354	1.00017	738.462
50	-0.0440593	0.555567	1.00018	740.063
50.2	-0.0442252	0.553768	1.00018	741.664
50.4	-0.0444727	0.551959	1.00018	743.25
50.6	-0.0447202	0.550137	1.00018	744.836
50.8	-0.0450492	0.548305	1.00018	746.406
51	-0.0452968	0.546461	1.00018	747.976
51.2	-0.0455445	0.544604	1.00018	749.53
51.4	-0.0457108	0.542732	1.00018	751.086
51.6	-0.0459586	0.540844	1.00018	752.624
51.8	-0.0462881	0.538941	1.00018	754.165
52	-0.0465361	0.537022	1.00018	755.688
52.2	-0.0467842	0.535087	1.00018	757.213
52.4	-0.0471139	0.533131	1.00018	758.721
52.6	-0.0473622	0.53116	1.00018	760.231
52.8	-0.0476105	0.52917	1.00018	761.723
53	-0.047859	0.527165	1.00018	763.22
53.2	-0.0481891	0.525144	1.00019	764.696
53.4	-0.0485193	0.523104	1.00019	766.178
53.6	-0.0487681	0.521041	1.00019	767.64
53.8	-0.049017	0.518953	1.00019	769.108
54	-0.0493475	0.516838	1.00019	770.555
54.2	-0.0496782	0.514697	1.00019	772.008
54.4	-0.0499275	0.512529	1.00019	773.44
54.6	-0.0502585	0.510336	1.00019	774.88
54.8	-0.050508	0.508116	1.00019	776.297
55	-0.0508393	0.505871	1.00019	777.723
55.2	-0.0511707	0.503598	1.00019	779.125
55.4	-0.0515022	0.501294	1.00019	780.537
55.6	-0.051834	0.498953	1.00019	781.925
55.8	-0.0520843	0.496574	1.00019	783.323
56	-0.0524981	0.494154	1.00019	784.696
56.2	-0.0528304	0.491698	1.00019	786.081
56.4	-0.053163	0.489202	1.00019	787.44
56.6	-0.0534958	0.486668	1.0002	788.811
56.8	-0.0538287	0.484095	1.0002	790.155
57	-0.0542436	0.481488	1.0002	791.514
57.2	-0.0544954	0.478843	1.0002	792.843
57.4	-0.0549925	0.476156	1.0002	794.189
57.6	-0.0553264	0.473423	1.0002	795.504
57.8	-0.0557424	0.470643	1.0002	796.837
58	-0.0560769	0.467811	1.0002	798.139
58.2	-0.0564936	0.464932	1.0002	799.459
58.4	-0.0569104	0.462021	1.0002	800.747
58.6	-0.0572459	0.459077	1.0002	802.055
58.8	-0.0576633	0.45613	1.0002	803.328
59	-0.0580807	0.453233	1.0002	804.624
59.2	-0.0584164	0.450364	1.0002	805.884
59.4	-0.0588342	0.44749	1.0002	807.168
59.6	-0.0592521	0.444609	1.0002	808.414
59.8	-0.0595884	0.441723	1.0002	809.686
60	-0.0599247	0.438901	1.0002	810.918
60.2	-0.060261	0.436086	1.0002	812.179
60.4	-0.0605973	0.433311	1.0002	813.397
60.6	-0.0609337	0.430543	1.00021	814.646
60.8	-0.06127	0.42781	1.00021	815.85
61	-0.0615244	0.425088	1.00021	817.088
61.2	-0.061861	0.422283	1.00021	818.279
61.4	-0.062034	0.419392	1.00021	819.506
61.6	-0.0623715	0.41629	1.00021	820.683
61.8	-0.0626281	0.412851	1.00021	821.9
62	-0.0629684	0.408889	1.00021	823.062
62.2	-0.0633934	0.404109	1.00021	824.269
62.4	-0.0639865	0.398149	1.00021	825.418
62.6	-0.0647509	0.390164	1.00021	826.615
62.8	-0.0657677	0.380515	1.00021	827.75
63	-0.066958	0.368456	1.00021	828.938
63.2	-0.0684082	0.353144	1.00021	830.059
63.4	-0.070292	0.332854	1.00021	831.237
63.6	-0.0729526	0.306073	1.00021	832.346
63.8	-0.0758795	0.278906	1.00021	833.515
64	-0.0786504	0.254178	1.00021	834.609
64.2	-0.0814254	0.232789	1.00021	835.77
64.4	-0.0837838	0.215196	1.00021	836.85
64.6	-0.085722	0.20079	1.00021	838.003
64.8	-0.0872426	0.188261	1.00021	839.069
65	-0.0883494	0.17647	1.00021	840.214
65.2	-0.088965	0.164168	1.00021	841.266
65.4	-0.0893521	0.144739	1.00021	842.403
65.6	-0.0896733	0.126356	1.00021	843.442
65.8	-0.0899105	0.110396	1.00021	844.571
66	-0.0901471	0.096536	1.00021	845.595
66.2	-0.0904676	0.0844893	1.00021	846.719
66.4	-0.0907034	0.0740103	1.00021	847.728
66.6	-0.0910235	0.0648871	1.00021	848.845
66.8	-0.0912583	0.0569377	1.00021	849.84
67	-0.0914927	0.0500053	1.00021	850.952
67.2	-0.091812	0.0439549	1.00021	851.931
67.4	-0.0921312	0.0386699	1.00021	853.038
67.6	-0.0923644	0.0340495	1.00021	854.003
67.8	-0.0925969	0.0300069	1.00021	855.106
68	-0.0929154	0.0264669	1.00021	856.054
68.2	-0.0931471	0.0233645	1.00021	857.154
68.4	-0.0934651	0.0206434	1.00021	858.087
68.6	-0.0936959	0.0182547	1.00021	859.184
68.8	-0.0940135	0.016156	1.00021	860.1
69	-0.0942434	0.0143108	1.00021	861.195
69.2	-0.0945605	0.0126871	1.00021	862.095
69.4	-0.0947896	0.0112571	1.00021	863.189
69.6	-0.0951062	0.00999673	1.00021	864.072
69.8	-0.0954227	0.00888497	1.00021	865.166
70	-0.0956505	0.00790351	1.00021	866.03
70.2	-0.0959665	0.00703637	1.00021	867.125
70.4	-0.0962824	0.00626961	1.00021	867.971
70.6	-0.0965981	0.00559109	1.00021	869.068
70.8	-0.0969137	0.00499033	1.00021	869.894
71	-0.0971394	0.00445784	1.00021	870.995
71.2	-0.0975442	0.00398562	1.00021	871.8
71.4	-0.0978591	0.00356659	1.00021	872.906
71.6	-0.0981738	0.00319418	1.00021	873.689
71.8	-0.0985784	0.00286339	1.00021	874.801
72	-0.0990734	0.00256973	1.00021	875.562
72.2	-0.0996588	0.00230957	1.00021	876.681
72.4	-0.100334	0.00208018	1.00021	877.417
72.6	-0.101282	0.00187932	1.00021	878.547
72.8	-0.10232	0.0017042	1.00021	879.257
73	-0.103816	0.00155489	1.00021	880.398
73.2	-0.105485	0.00143904	1.00021	881.081
73.4	-0.10742	0.00135319	1.00021	882.236
73.6	-0.109258	0.00129142	1.00021	882.889
73.8	-0.110276	0.00124956	1.00021	884.061
74	-0.110338	0.0012003	1.00021	884.682
74.2	-0.110491	0.00115338	1.00021	885.873
74.4	-0.110549	0.00110953	1.00021	886.461
74.6	-0.110793	0.00106705	1.00021	887.673
74.8	-0.110754	0.00103131	1.00021	888.224
75	-0.11128	0.000992974	1.00021	889.462
75.2	-0.110762	0.000954384	1.00021	889.974
75.4	-0.113352	0.000952719	1.00021	891.24
75.6	-0.113399	0.000859184	1.00021	891.71
75.8	-0.113474	0.000994694	1.00021	893.009
76	-0.113417	0.000887318	1.00021	893.432
76.2	-0.113406	0.00089544	1.00021	894.768
76.4	-0.113428	0.00099059	1.00021	895.14
76.6	-0.113428	0.000817409	1.00021	896.518
76.8	-0.113433	0.000968119	1.00021	896.835
77	-0.113445	0.000919048	1.00021	898.26
77.2	-0.113433	0.000821743	1.00021	898.517
77.4	-0.113459	0.00101221	1.00021	899.996
77.6	-0.113427	0.000805267	1.00021	900.187
77.8	-0.113469	0.000915492	1.00021	901.726
78	-0.113415	0.000969459	1.00021	901.845
78.2	-0.113379	0.000746485	1.00021	903.453
78.4	-0.113399	0.00101754	1.00021	903.495
78.6	-0.113385	0.000833048	1.00021	905.184
			1.00021
