# Supplementary material for: Gas transport in firn: multiple-tracer characterisation and model intercomparison for NEEM, Northern Greenland
Source: Copernicus journal article supplement (doi:10.5194/acp-12-4259-2012), 2012-05-14
Supplement: Supplementary file 15 [file NEEM08_US_OSU.xls]

## Sheet: Diffusivity
depth	Molec diff	Convective mixing
0	1.16729e-05	1.99873e-05
0.0925177	1.16729e-05	1.95303e-05
0.185035	1.16729e-05	1.90838e-05
0.277553	1.16729e-05	1.86475e-05
0.370071	1.16729e-05	1.82212e-05
0.462588	1.16729e-05	1.78046e-05
0.555106	1.16729e-05	1.73975e-05
0.647624	1.16729e-05	1.69998e-05
0.740142	1.16729e-05	1.66111e-05
0.832659	1.16729e-05	1.62313e-05
0.925177	1.16729e-05	1.58603e-05
1.01769	1.16729e-05	1.54976e-05
1.11021	1.16729e-05	1.51433e-05
1.20273	1.16729e-05	1.47971e-05
1.29525	1.16729e-05	1.44588e-05
1.38777	1.16729e-05	1.41283e-05
1.48028	1.16729e-05	1.38053e-05
1.5728	1.16729e-05	1.34896e-05
1.66532	1.16729e-05	1.31812e-05
1.75784	1.16729e-05	1.28799e-05
1.85035	1.16729e-05	1.25854e-05
1.94287	1.16729e-05	1.22977e-05
2.03539	1.16729e-05	1.20165e-05
2.12791	1.16729e-05	1.17418e-05
2.22042	1.16319e-05	1.14734e-05
2.31294	1.15909e-05	1.12111e-05
2.40546	1.15499e-05	1.09548e-05
2.49798	1.15089e-05	1.07043e-05
2.5905	1.14679e-05	1.04596e-05
2.68301	1.14269e-05	1.02205e-05
2.77553	1.13859e-05	9.98681e-06
2.86805	1.13449e-05	9.75849e-06
2.96057	1.13039e-05	9.5354e-06
3.05308	1.1263e-05	9.3174e-06
3.1456	1.1222e-05	9.10439e-06
3.23812	1.1181e-05	8.89625e-06
3.33064	1.114e-05	8.69287e-06
3.42315	1.10991e-05	8.49414e-06
3.51567	1.10581e-05	8.29995e-06
3.60819	1.10171e-05	8.11021e-06
3.70071	1.09762e-05	7.9248e-06
3.79323	1.09352e-05	7.74363e-06
3.88574	1.08943e-05	7.5666e-06
3.97826	1.08533e-05	7.39362e-06
4.07078	1.08124e-05	7.2246e-06
4.1633	1.07715e-05	7.05944e-06
4.25581	1.07305e-05	6.89805e-06
4.34833	1.06896e-05	6.74036e-06
4.44085	1.06487e-05	6.58627e-06
4.53337	1.06078e-05	6.4357e-06
4.62588	1.05669e-05	6.28858e-06
4.7184	1.0526e-05	6.14482e-06
4.81092	1.04851e-05	6.00435e-06
4.90344	1.04442e-05	5.86709e-06
4.99596	1.04033e-05	5.73297e-06
5.08847	1.03624e-05	5.60191e-06
5.18099	1.03215e-05	5.47385e-06
5.27351	1.02807e-05	5.34872e-06
5.36603	1.02398e-05	5.22645e-06
5.45854	1.0199e-05	5.10697e-06
5.55106	1.01581e-05	4.99023e-06
5.64358	1.01173e-05	4.87616e-06
5.7361	1.00765e-05	4.76469e-06
5.82861	1.00357e-05	4.65578e-06
5.92113	9.9949e-06	4.54935e-06
6.01365	9.95411e-06	4.44536e-06
6.10617	9.91334e-06	4.34374e-06
6.19869	9.87257e-06	4.24445e-06
6.2912	9.83182e-06	4.14743e-06
6.38372	9.79108e-06	4.05262e-06
6.47624	9.75036e-06	3.95999e-06
6.56876	9.70964e-06	3.86947e-06
6.66127	9.66895e-06	3.78102e-06
6.75379	9.62826e-06	3.69459e-06
6.84631	9.58759e-06	3.61014e-06
6.93883	9.54694e-06	3.52762e-06
7.03135	9.5063e-06	3.44699e-06
7.12386	9.46568e-06	3.3682e-06
7.21638	9.42508e-06	3.29121e-06
7.3089	9.3845e-06	3.21599e-06
7.40142	9.34393e-06	3.14248e-06
7.49393	9.30339e-06	3.07065e-06
7.58645	9.26287e-06	3.00047e-06
7.67897	9.22237e-06	2.93189e-06
7.77149	9.18189e-06	2.86488e-06
7.864	9.14143e-06	2.7994e-06
7.95652	9.101e-06	2.73541e-06
8.04904	1.16729e-05	2.67289e-06
8.14156	1.16729e-05	2.6118e-06
8.23408	1.16729e-05	2.55211e-06
8.32659	1.16729e-05	2.49378e-06
8.41911	1.16729e-05	2.43679e-06
8.51163	1.16729e-05	2.38109e-06
8.60415	1.16729e-05	2.32668e-06
8.69666	1.16729e-05	2.2735e-06
8.78918	1.16729e-05	2.22154e-06
8.8817	1.16729e-05	2.17077e-06
8.97422	1.16729e-05	2.12116e-06
9.06673	1.16729e-05	2.07269e-06
9.15925	1.16729e-05	2.02532e-06
9.25177	1.16729e-05	1.97904e-06
9.34429	1.16729e-05	1.93381e-06
9.43681	1.16729e-05	1.88962e-06
9.52932	1.16729e-05	1.84644e-06
9.62184	1.16729e-05	1.80424e-06
9.71436	1.16729e-05	1.76301e-06
9.80688	1.16729e-05	1.72273e-06
9.89939	1.16729e-05	1.68336e-06
9.99191	1.16729e-05	1.6449e-06
10.0844	1.16729e-05	1.60731e-06
10.1769	1.16729e-05	1.57058e-06
10.2695	1.16729e-05	1.5347e-06
10.362	1.16729e-05	1.49963e-06
10.4545	1.16729e-05	1.46537e-06
10.547	1.16729e-05	1.43188e-06
10.6395	1.16729e-05	1.39917e-06
10.7321	1.16729e-05	1.3672e-06
10.8246	1.16729e-05	1.33596e-06
10.9171	1.16729e-05	1.30544e-06
11.0096	1.16729e-05	1.27562e-06
11.1021	1.16729e-05	1.24647e-06
11.1946	1.16729e-05	1.218e-06
11.2872	1.16729e-05	1.19017e-06
11.3797	1.16729e-05	1.16298e-06
11.4722	1.16729e-05	1.13642e-06
11.5647	1.16729e-05	1.11045e-06
11.6572	1.16729e-05	1.08509e-06
11.7497	1.16729e-05	1.0603e-06
11.8423	1.16729e-05	1.03608e-06
11.9348	1.16729e-05	1.01242e-06
12.0273	1.16729e-05	9.89291e-07
12.1198	1.16729e-05	9.66695e-07
12.2123	1.16729e-05	9.44615e-07
12.3049	1.16729e-05	9.2304e-07
12.3974	1.16729e-05	9.01959e-07
12.4899	1.16729e-05	8.81359e-07
12.5824	1.16729e-05	8.6123e-07
12.6749	1.16729e-05	8.41562e-07
12.7674	1.16729e-05	8.22344e-07
12.86	1.16729e-05	8.03564e-07
12.9525	1.16729e-05	7.85214e-07
13.045	1.16729e-05	7.67284e-07
13.1375	1.16729e-05	7.49764e-07
13.23	1.16729e-05	7.32644e-07
13.3225	1.16729e-05	7.15916e-07
13.4151	1.16729e-05	6.9957e-07
13.5076	1.16729e-05	6.83598e-07
13.6001	1.16729e-05	6.67991e-07
13.6926	1.16729e-05	6.52741e-07
13.7851	1.16729e-05	6.37839e-07
13.8777	1.16729e-05	6.23279e-07
13.9702	1.16729e-05	6.09051e-07
14.0627	1.16729e-05	5.95148e-07
14.1552	1.16729e-05	5.81564e-07
14.2477	1.16729e-05	5.6829e-07
14.3402	1.16729e-05	5.55319e-07
14.4328	1.16729e-05	5.42645e-07
14.5253	1.16729e-05	5.30261e-07
14.6178	1.16729e-05	5.1816e-07
14.7103	1.16729e-05	5.06336e-07
14.8028	1.16729e-05	4.94782e-07
14.8953	1.16729e-05	4.83492e-07
14.9879	1.16729e-05	4.7246e-07
15.0804	1.16729e-05	4.61681e-07
15.1729	1.16729e-05	4.51148e-07
15.2654	1.16729e-05	4.40855e-07
15.3579	1.16729e-05	4.30799e-07
15.4505	1.16729e-05	4.20972e-07
15.543	1.16729e-05	4.11369e-07
15.6355	1.16729e-05	4.01987e-07
15.728	1.16729e-05	3.92819e-07
15.8205	1.16729e-05	3.8386e-07
15.913	1.16729e-05	3.75106e-07
16.0056	1.16729e-05	3.66553e-07
16.0981	1.16729e-05	3.58195e-07
16.1906	1.16729e-05	3.50028e-07
16.2831	1.16729e-05	3.42048e-07
16.3756	1.16729e-05	3.3425e-07
16.4682	1.16729e-05	3.2663e-07
16.5607	1.16729e-05	3.19185e-07
16.6532	1.16729e-05	3.1191e-07
16.7457	1.16729e-05	3.04802e-07
16.8382	1.16729e-05	2.97855e-07
16.9307	1.16729e-05	2.91068e-07
17.0233	1.16729e-05	2.84436e-07
17.1158	1.16729e-05	2.77956e-07
17.2083	1.16729e-05	2.71623e-07
17.3008	1.16729e-05	2.65436e-07
17.3933	1.16729e-05	2.5939e-07
17.4858	1.16725e-05	2.53482e-07
17.5784	1.16414e-05	2.47709e-07
17.6709	1.16104e-05	2.42068e-07
17.7634	1.15794e-05	2.36556e-07
17.8559	1.15485e-05	2.31171e-07
17.9484	1.15176e-05	2.25908e-07
18.041	1.14867e-05	2.20766e-07
18.1335	1.14559e-05	2.15741e-07
18.226	1.1425e-05	2.10831e-07
18.3185	1.13942e-05	2.06034e-07
18.411	1.13635e-05	2.01346e-07
18.5035	1.13328e-05	1.96765e-07
18.5961	1.13021e-05	1.92289e-07
18.6886	1.12714e-05	1.87915e-07
18.7811	1.12407e-05	1.83642e-07
18.8736	1.12101e-05	1.79466e-07
18.9661	1.11796e-05	1.75385e-07
19.0586	1.1149e-05	1.71398e-07
19.1512	1.11185e-05	1.67502e-07
19.2437	1.1088e-05	1.63695e-07
19.3362	1.10575e-05	1.59975e-07
19.4287	1.10271e-05	1.5634e-07
19.5212	1.09967e-05	1.52789e-07
19.6138	1.09663e-05	1.49318e-07
19.7063	1.0936e-05	1.45927e-07
19.7988	1.09057e-05	1.42613e-07
19.8913	1.08754e-05	1.39376e-07
19.9838	1.08452e-05	1.36212e-07
20.0763	1.08149e-05	1.3312e-07
20.1689	1.07848e-05	1.30099e-07
20.2614	1.07546e-05	1.27148e-07
20.3539	1.07245e-05	1.24263e-07
20.4464	1.06944e-05	1.21445e-07
20.5389	1.06643e-05	1.18691e-07
20.6314	1.06343e-05	1.16e-07
20.724	1.06043e-05	1.13371e-07
20.8165	1.05743e-05	1.10802e-07
20.909	1.05443e-05	1.08291e-07
21.0015	1.05144e-05	1.05838e-07
21.094	1.04845e-05	1.03441e-07
21.1866	1.04547e-05	1.01099e-07
21.2791	1.04248e-05	9.88101e-08
21.3716	1.0395e-05	9.65738e-08
21.4641	1.03653e-05	9.43886e-08
21.5566	1.03355e-05	9.22533e-08
21.6491	1.03058e-05	9.01669e-08
21.7417	1.02762e-05	8.81282e-08
21.8342	1.02465e-05	8.61361e-08
21.9267	1.02169e-05	8.41895e-08
22.0192	1.01873e-05	8.22874e-08
22.1117	1.01577e-05	8.04289e-08
22.2042	1.01282e-05	7.86128e-08
22.2968	1.00987e-05	7.68382e-08
22.3893	1.00693e-05	7.51042e-08
22.4818	1.00398e-05	7.34099e-08
22.5743	1.00104e-05	7.17543e-08
22.6668	9.98104e-06	7.01366e-08
22.7594	9.95169e-06	6.85558e-08
22.8519	9.92238e-06	6.70112e-08
22.9444	9.89309e-06	6.55019e-08
23.0369	9.86384e-06	6.40271e-08
23.1294	9.83461e-06	6.25861e-08
23.2219	9.80541e-06	6.11779e-08
23.3145	9.77625e-06	5.9802e-08
23.407	9.74711e-06	5.84576e-08
23.4995	9.71801e-06	5.71438e-08
23.592	9.68893e-06	5.58601e-08
23.6845	9.65989e-06	5.46058e-08
23.777	9.63087e-06	5.33801e-08
23.8696	9.60189e-06	5.21825e-08
23.9621	9.57293e-06	5.10123e-08
24.0546	9.54401e-06	4.98688e-08
24.1471	9.51511e-06	4.87514e-08
24.2396	9.48625e-06	4.76596e-08
24.3322	9.45741e-06	4.65928e-08
24.4247	9.42861e-06	4.55503e-08
24.5172	9.39984e-06	4.45317e-08
24.6097	9.37109e-06	4.35364e-08
24.7022	9.34238e-06	4.25638e-08
24.7947	9.31369e-06	4.16135e-08
24.8873	9.28504e-06	4.06849e-08
24.9798	9.25641e-06	3.97775e-08
25.0723	9.22782e-06	3.88909e-08
25.1648	9.19926e-06	3.80245e-08
25.2573	9.17072e-06	3.7178e-08
25.3498	9.14222e-06	3.63508e-08
25.4424	9.11375e-06	3.55425e-08
25.5349	9.0853e-06	3.47527e-08
25.6274	9.05689e-06	3.3981e-08
25.7199	9.0285e-06	3.32269e-08
25.8124	9.00015e-06	3.24901e-08
25.905	8.97183e-06	3.177e-08
25.9975	8.94353e-06	3.10665e-08
26.09	8.91527e-06	3.03791e-08
26.1825	8.88704e-06	2.97073e-08
26.275	8.85883e-06	2.90509e-08
26.3675	8.83066e-06	2.84096e-08
26.4601	8.80252e-06	2.77829e-08
26.5526	8.77441e-06	2.71705e-08
26.6451	8.74632e-06	2.65721e-08
26.7376	8.71827e-06	2.59874e-08
26.8301	8.69025e-06	2.54161e-08
26.9227	8.66225e-06	2.48578e-08
27.0152	8.63429e-06	2.43123e-08
27.1077	8.60636e-06	2.37793e-08
27.2002	8.57846e-06	2.32584e-08
27.2927	8.55058e-06	2.27495e-08
27.3852	8.52274e-06	2.22522e-08
27.4778	8.49493e-06	2.17663e-08
27.5703	8.46714e-06	2.12915e-08
27.6628	8.43939e-06	2.08275e-08
27.7553	8.41167e-06	2.03742e-08
27.8478	8.38398e-06	1.99312e-08
27.9403	8.35631e-06	1.94983e-08
28.0329	8.32868e-06	1.90754e-08
28.1254	8.30108e-06	1.86621e-08
28.2179	8.27351e-06	1.82582e-08
28.3104	8.24597e-06	1.78636e-08
28.4029	8.21845e-06	1.7478e-08
28.4955	8.19097e-06	1.71013e-08
28.588	8.16352e-06	1.67331e-08
28.6805	8.1361e-06	1.63734e-08
28.773	8.1087e-06	1.60219e-08
28.8655	8.08134e-06	1.56784e-08
28.958	8.05401e-06	1.53428e-08
29.0506	8.02671e-06	1.50148e-08
29.1431	7.99944e-06	1.46944e-08
29.2356	7.97219e-06	1.43812e-08
29.3281	7.94498e-06	1.40753e-08
29.4206	7.9178e-06	1.37763e-08
29.5131	7.89065e-06	1.34842e-08
29.6057	7.86352e-06	1.31987e-08
29.6982	7.83643e-06	1.29198e-08
29.7907	7.80937e-06	1.26472e-08
29.8832	7.78234e-06	1.23809e-08
29.9757	7.75534e-06	1.21207e-08
30.0683	7.72836e-06	1.18664e-08
30.1608	7.70142e-06	1.1618e-08
30.2533	7.67451e-06	1.13752e-08
30.3458	7.64763e-06	1.11379e-08
30.4383	7.62077e-06	1.09061e-08
30.5308	7.59395e-06	1.06796e-08
30.6234	7.56716e-06	1.04583e-08
30.7159	7.5404e-06	1.0242e-08
30.8084	7.51366e-06	1.00307e-08
30.9009	7.48696e-06	9.8242e-09
30.9934	7.46029e-06	9.62242e-09
31.0859	7.43365e-06	9.42527e-09
31.1785	7.40703e-06	9.23261e-09
31.271	7.38045e-06	9.04437e-09
31.3635	7.3539e-06	8.86043e-09
31.456	7.32738e-06	8.68069e-09
31.5485	7.30088e-06	8.50506e-09
31.6411	7.27442e-06	8.33345e-09
31.7336	7.24799e-06	8.16576e-09
31.8261	7.22159e-06	8.00191e-09
31.9186	7.19521e-06	7.8418e-09
32.0111	7.16887e-06	7.68536e-09
32.1036	7.14256e-06	7.53249e-09
32.1962	7.11627e-06	7.38311e-09
32.2887	7.09002e-06	7.23715e-09
32.3812	7.0638e-06	7.09453e-09
32.4737	7.0376e-06	6.95517e-09
32.5662	7.01144e-06	6.819e-09
32.6587	6.98531e-06	6.68594e-09
32.7513	6.9592e-06	6.55592e-09
32.8438	6.93313e-06	6.42887e-09
32.9363	6.90708e-06	6.30473e-09
33.0288	6.88107e-06	6.18343e-09
33.1213	6.85509e-06	6.0649e-09
33.2139	6.82913e-06	5.94908e-09
33.3064	6.80321e-06	5.83591e-09
33.3989	6.77731e-06	5.72532e-09
33.4914	6.75145e-06	5.61727e-09
33.5839	6.72561e-06	5.51168e-09
33.6764	6.69981e-06	5.40851e-09
33.769	6.67403e-06	5.3077e-09
33.8615	6.64829e-06	5.20919e-09
33.954	6.62257e-06	5.11294e-09
34.0465	6.59689e-06	5.01888e-09
34.139	6.57123e-06	4.92698e-09
34.2315	6.54561e-06	4.83718e-09
34.3241	6.52001e-06	4.74943e-09
34.4166	6.49445e-06	4.66369e-09
34.5091	6.46891e-06	4.57991e-09
34.6016	6.4434e-06	4.49804e-09
34.6941	6.41793e-06	4.41804e-09
34.7867	6.39248e-06	4.33988e-09
34.8792	6.36706e-06	4.2635e-09
34.9717	6.34168e-06	4.18887e-09
35.0642	6.31632e-06	4.11594e-09
35.1567	6.29099e-06	4.04468e-09
35.2492	6.26569e-06	3.97505e-09
35.3418	6.24042e-06	3.90702e-09
35.4343	6.21519e-06	3.84053e-09
35.5268	6.18998e-06	3.77557e-09
35.6193	6.1648e-06	3.7121e-09
35.7118	6.13965e-06	3.65007e-09
35.8043	6.11453e-06	3.58946e-09
35.8969	6.08944e-06	3.53024e-09
35.9894	6.06438e-06	3.47238e-09
36.0819	6.03935e-06	3.41583e-09
36.1744	6.01435e-06	3.36058e-09
36.2669	5.98938e-06	3.30659e-09
36.3595	5.96444e-06	3.25384e-09
36.452	5.93953e-06	3.20229e-09
36.5445	5.91465e-06	3.15192e-09
36.637	5.8898e-06	3.10271e-09
36.7295	5.86498e-06	3.05461e-09
36.822	5.84018e-06	3.00762e-09
36.9146	5.81542e-06	2.9617e-09
37.0071	5.79069e-06	2.91684e-09
37.0996	5.76599e-06	2.87299e-09
37.1921	5.74131e-06	2.83015e-09
37.2846	5.71667e-06	2.78829e-09
37.3772	5.69206e-06	2.74739e-09
37.4697	5.66747e-06	2.70742e-09
37.5622	5.64292e-06	2.66837e-09
37.6547	5.61839e-06	2.63021e-09
37.7472	5.59389e-06	2.59292e-09
37.8397	5.56943e-06	2.55648e-09
37.9323	5.54499e-06	2.52088e-09
38.0248	5.52059e-06	2.48609e-09
38.1173	5.49621e-06	2.4521e-09
38.2098	5.47186e-06	2.41888e-09
38.3023	5.44754e-06	2.38642e-09
38.3948	5.42325e-06	2.35471e-09
38.4874	5.399e-06	2.32372e-09
38.5799	5.37477e-06	2.29344e-09
38.6724	5.35057e-06	2.26385e-09
38.7649	5.3264e-06	2.23494e-09
38.8574	5.30225e-06	2.20669e-09
38.95	5.27814e-06	2.17908e-09
39.0425	5.25406e-06	2.15211e-09
39.135	5.23001e-06	2.12575e-09
39.2275	5.20599e-06	2.09999e-09
39.32	5.18199e-06	2.07483e-09
39.4125	5.15803e-06	2.05024e-09
39.5051	5.13409e-06	2.02621e-09
39.5976	5.11019e-06	2.00273e-09
39.6901	5.08631e-06	1.97979e-09
39.7826	5.06247e-06	1.95737e-09
39.8751	5.03865e-06	1.93547e-09
39.9676	5.01486e-06	1.91406e-09
40.0602	4.9911e-06	1.89315e-09
40.1527	4.96738e-06	1.87271e-09
40.2452	4.94368e-06	1.85274e-09
40.3377	4.92001e-06	1.83323e-09
40.4302	4.89637e-06	1.81416e-09
40.5228	4.87275e-06	1.79553e-09
40.6153	4.84917e-06	1.77733e-09
40.7078	4.82562e-06	1.75954e-09
40.8003	4.80209e-06	1.74216e-09
40.8928	4.7786e-06	1.72517e-09
40.9853	4.75514e-06	1.70858e-09
41.0779	4.7317e-06	1.69236e-09
41.1704	4.70829e-06	1.67651e-09
41.2629	4.68492e-06	1.66103e-09
41.3554	4.66157e-06	1.6459e-09
41.4479	4.63825e-06	1.63112e-09
41.5404	4.61496e-06	1.61667e-09
41.633	4.5917e-06	1.60256e-09
41.7255	4.56846e-06	1.58876e-09
41.818	4.54526e-06	1.57529e-09
41.9105	4.52209e-06	1.56212e-09
42.003	4.49894e-06	1.54925e-09
42.0956	4.47583e-06	1.53668e-09
42.1881	4.45274e-06	1.52439e-09
42.2806	4.42968e-06	1.51238e-09
42.3731	4.40666e-06	1.50065e-09
42.4656	4.38366e-06	1.48919e-09
42.5581	4.36069e-06	1.47799e-09
42.6507	4.33774e-06	1.46705e-09
42.7432	4.31483e-06	1.45635e-09
42.8357	4.29195e-06	1.4459e-09
42.9282	4.26909e-06	1.43569e-09
43.0207	4.24627e-06	1.42571e-09
43.1132	4.22347e-06	1.41597e-09
43.2058	4.2007e-06	1.40644e-09
43.2983	4.17796e-06	1.39713e-09
43.3908	4.15525e-06	1.38803e-09
43.4833	4.13257e-06	1.37915e-09
43.5758	4.10992e-06	1.37046e-09
43.6684	4.08729e-06	1.36198e-09
43.7609	4.0647e-06	1.35369e-09
43.8534	4.04213e-06	1.34558e-09
43.9459	4.01959e-06	1.33767e-09
44.0384	3.99708e-06	1.32993e-09
44.1309	3.9746e-06	1.32237e-09
44.2235	3.95215e-06	1.31498e-09
44.316	3.92972e-06	1.30777e-09
44.4085	3.90733e-06	1.30071e-09
44.501	3.88496e-06	1.29382e-09
44.5935	3.86262e-06	1.28709e-09
44.686	3.84031e-06	1.28051e-09
44.7786	3.81803e-06	1.27408e-09
44.8711	3.79577e-06	1.2678e-09
44.9636	3.77355e-06	1.26166e-09
45.0561	3.75135e-06	1.25566e-09
45.1486	3.72918e-06	1.2498e-09
45.2412	3.70704e-06	1.24407e-09
45.3337	3.68493e-06	1.23848e-09
45.4262	3.66285e-06	1.23301e-09
45.5187	3.64079e-06	1.22767e-09
45.6112	3.61876e-06	1.22244e-09
45.7037	3.59676e-06	1.21734e-09
45.7963	3.57479e-06	1.21236e-09
45.8888	3.55285e-06	1.20749e-09
45.9813	3.53093e-06	1.20273e-09
46.0738	3.50905e-06	1.19808e-09
46.1663	3.48719e-06	1.19353e-09
46.2588	3.46535e-06	1.18909e-09
46.3514	3.44355e-06	1.18475e-09
46.4439	3.42177e-06	1.18051e-09
46.5364	3.40003e-06	1.17637e-09
46.6289	3.37831e-06	1.17232e-09
46.7214	3.35661e-06	1.16837e-09
46.814	3.33495e-06	1.1645e-09
46.9065	3.31331e-06	1.16072e-09
46.999	3.2917e-06	1.15703e-09
47.0915	3.27012e-06	1.15343e-09
47.184	3.24856e-06	1.1499e-09
47.2765	3.22703e-06	1.14646e-09
47.3691	3.20553e-06	1.1431e-09
47.4616	3.18406e-06	1.13981e-09
47.5541	3.16262e-06	1.1366e-09
47.6466	3.1412e-06	1.13346e-09
47.7391	3.11981e-06	1.13039e-09
47.8316	3.09844e-06	1.12739e-09
47.9242	3.07711e-06	1.12447e-09
48.0167	3.0558e-06	1.1216e-09
48.1092	3.03451e-06	1.11881e-09
48.2017	3.01326e-06	1.11608e-09
48.2942	2.99203e-06	1.11341e-09
48.3868	2.97083e-06	1.1108e-09
48.4793	2.94965e-06	1.10825e-09
48.5718	2.9285e-06	1.10576e-09
48.6643	2.90738e-06	1.10333e-09
48.7568	2.88629e-06	1.10095e-09
48.8493	2.86522e-06	1.09862e-09
48.9419	2.84417e-06	1.09635e-09
49.0344	2.82316e-06	1.09413e-09
49.1269	2.80217e-06	1.09197e-09
49.2194	2.78121e-06	1.08985e-09
49.3119	2.76027e-06	1.08778e-09
49.4045	2.73936e-06	1.08576e-09
49.497	2.71847e-06	1.08378e-09
49.5895	2.69761e-06	1.08185e-09
49.682	2.67678e-06	1.07996e-09
49.7745	2.65597e-06	1.07812e-09
49.867	2.63519e-06	1.07632e-09
49.9596	2.61444e-06	1.07455e-09
50.0521	2.59371e-06	1.07283e-09
50.1446	2.573e-06	1.07115e-09
50.2371	2.55233e-06	1.06951e-09
50.3296	2.53167e-06	1.06791e-09
50.4221	2.51105e-06	1.06634e-09
50.5147	2.49044e-06	1.06481e-09
50.6072	2.46987e-06	1.06331e-09
50.6997	2.44931e-06	1.06184e-09
50.7922	2.42879e-06	1.06041e-09
50.8847	2.40828e-06	1.05902e-09
50.9773	2.38781e-06	1.05765e-09
51.0698	2.36735e-06	1.05632e-09
51.1623	2.34693e-06	1.05502e-09
51.2548	2.32652e-06	1.05374e-09
51.3473	2.30614e-06	1.0525e-09
51.4398	2.28579e-06	1.05128e-09
51.5324	2.26546e-06	1.05009e-09
51.6249	2.24515e-06	1.04893e-09
51.7174	2.22487e-06	1.0478e-09
51.8099	2.20461e-06	1.04669e-09
51.9024	2.18438e-06	1.04561e-09
51.9949	2.16417e-06	1.04455e-09
52.0875	2.14398e-06	1.04351e-09
52.18	2.12382e-06	1.0425e-09
52.2725	2.10368e-06	1.04152e-09
52.365	2.08356e-06	1.04055e-09
52.4575	2.06347e-06	1.03961e-09
52.5501	2.0434e-06	1.03869e-09
52.6426	2.02335e-06	1.03779e-09
52.7351	2.00332e-06	1.03691e-09
52.8276	1.98332e-06	1.03605e-09
52.9201	1.96334e-06	1.03521e-09
53.0126	1.94338e-06	1.03439e-09
53.1052	1.92345e-06	1.03359e-09
53.1977	1.90354e-06	1.0328e-09
53.2902	1.88365e-06	1.03204e-09
53.3827	1.86378e-06	1.03129e-09
53.4752	1.84393e-06	1.03056e-09
53.5677	1.8241e-06	1.02984e-09
53.6603	1.8043e-06	1.02914e-09
53.7528	1.78451e-06	1.02846e-09
53.8453	1.76475e-06	1.0278e-09
53.9378	1.74501e-06	1.02715e-09
54.0303	1.72529e-06	1.02651e-09
54.1229	1.70559e-06	1.02589e-09
54.2154	1.68591e-06	1.02528e-09
54.3079	1.66625e-06	1.02469e-09
54.4004	1.64661e-06	1.02411e-09
54.4929	1.62699e-06	1.02354e-09
54.5854	1.60739e-06	1.02299e-09
54.678	1.58781e-06	1.02244e-09
54.7705	1.56825e-06	1.02192e-09
54.863	1.54871e-06	1.0214e-09
54.9555	1.52919e-06	1.02089e-09
55.048	1.50969e-06	1.0204e-09
55.1405	1.4902e-06	1.01992e-09
55.2331	1.47073e-06	1.01945e-09
55.3256	1.45129e-06	1.01899e-09
55.4181	1.43185e-06	1.01854e-09
55.5106	1.41244e-06	1.0181e-09
55.6031	1.39305e-06	1.01767e-09
55.6957	1.37367e-06	1.01725e-09
55.7882	1.35431e-06	1.01684e-09
55.8807	1.33496e-06	1.01644e-09
55.9732	1.31563e-06	1.01605e-09
56.0657	1.29632e-06	1.01566e-09
56.1582	1.27703e-06	1.01529e-09
56.2508	1.25775e-06	1.01492e-09
56.3433	1.23848e-06	1.01457e-09
56.4358	1.21923e-06	1.01422e-09
56.5283	1.2e-06	1.01388e-09
56.6208	1.18078e-06	1.01355e-09
56.7133	1.16158e-06	1.01322e-09
56.8059	1.14239e-06	1.0129e-09
56.8984	1.12321e-06	1.01259e-09
56.9909	1.10405e-06	1.01229e-09
57.0834	1.0849e-06	1.01199e-09
57.1759	1.06576e-06	1.0117e-09
57.2685	1.04664e-06	1.01142e-09
57.361	1.02753e-06	1.01114e-09
57.4535	1.00843e-06	1.01087e-09
57.546	9.89339e-07	1.01061e-09
57.6385	9.70263e-07	1.01035e-09
57.731	9.51198e-07	1.0101e-09
57.8236	9.32144e-07	1.00985e-09
57.9161	9.131e-07	1.00961e-09
58.0086	8.94066e-07	1.00937e-09
58.1011	8.75042e-07	1.00914e-09
58.1936	8.56027e-07	1.00892e-09
58.2861	8.37021e-07	1.0087e-09
58.3787	8.18023e-07	1.00849e-09
58.4712	7.99034e-07	1.00828e-09
58.5637	7.80052e-07	1.00807e-09
58.6562	7.61078e-07	1.00787e-09
58.7487	7.4211e-07	1.00767e-09
58.8413	7.23149e-07	1.00748e-09
58.9338	7.04194e-07	1.0073e-09
59.0263	6.85245e-07	1.00711e-09
59.1188	6.66301e-07	1.00694e-09
59.2113	6.47361e-07	1.00676e-09
59.3038	6.28426e-07	1.00659e-09
59.3964	6.09495e-07	1.00643e-09
59.4889	5.90566e-07	1.00626e-09
59.5814	5.71641e-07	1.0061e-09
59.6739	5.52718e-07	1.00595e-09
59.7664	5.33796e-07	1.0058e-09
59.859	5.14876e-07	1.00565e-09
59.9515	4.95957e-07	1.0055e-09
60.044	4.77038e-07	1.00536e-09
60.1365	4.58118e-07	1.00522e-09
60.229	4.39197e-07	1.00509e-09
60.3215	4.20275e-07	1.00496e-09
60.4141	4.01351e-07	1.00483e-09
60.5066	3.82425e-07	1.0047e-09
60.5991	3.63494e-07	1.00458e-09
60.6916	3.4456e-07	1.00446e-09
60.7841	3.25622e-07	1.00434e-09
60.8766	3.06678e-07	1.00423e-09
60.9692	2.87729e-07	1.00411e-09
61.0617	2.68772e-07	1.004e-09
61.1542	2.49809e-07	1.0039e-09
61.2467	2.30838e-07	1.00379e-09
61.3392	2.11858e-07	1.00369e-09
61.4318	1.92869e-07	1.00359e-09
61.5243	1.7387e-07	1.00349e-09
61.6168	1.54861e-07	1.0034e-09
61.7093	1.35839e-07	1.0033e-09
61.8018	1.16806e-07	1.00321e-09
61.8943	9.77592e-08	1.00312e-09
61.9869	7.86986e-08	1.00304e-09
62.0794	7.10836e-08	1.01798e-09
62.1719	6.42054e-08	1.03699e-09
62.2644	5.79927e-08	1.05636e-09
62.3569	5.23812e-08	1.07609e-09
62.4494	4.73127e-08	1.09618e-09
62.542	4.27346e-08	1.11665e-09
62.6345	3.85995e-08	1.13751e-09
62.727	3.48645e-08	1.15875e-09
62.8195	3.1491e-08	1.18039e-09
62.912	2.84438e-08	1.20244e-09
63.0046	2.56915e-08	1.22489e-09
63.0971	2.32056e-08	1.24777e-09
63.1896	2.09601e-08	1.27107e-09
63.2821	1.8932e-08	1.29481e-09
63.3746	1.71001e-08	1.31899e-09
63.4671	1.54454e-08	1.34363e-09
63.5597	1.39509e-08	1.36872e-09
63.6522	1.2601e-08	1.39428e-09
63.7447	1.13817e-08	1.42032e-09
63.8372	1.02804e-08	1.44685e-09
63.9297	9.28562e-09	1.47387e-09
64.0222	8.38712e-09	1.50139e-09
64.1148	7.57556e-09	1.52943e-09
64.2073	6.84254e-09	1.558e-09
64.2998	6.18044e-09	1.58709e-09
64.3923	5.5824e-09	1.61673e-09
64.4848	5.04224e-09	1.64693e-09
64.5774	4.55434e-09	1.67768e-09
64.6699	4.11365e-09	1.70902e-09
64.7624	3.71561e-09	1.74093e-09
64.8549	3.35607e-09	1.77345e-09
64.9474	3.03133e-09	1.80657e-09
65.0399	2.73801e-09	1.84031e-09
65.1325	2.47308e-09	1.87468e-09
65.225	2.23378e-09	1.90969e-09
65.3175	2.01763e-09	1.94535e-09
65.41	1.8224e-09	1.98168e-09
65.5025	1.64606e-09	2.01869e-09
65.595	1.48679e-09	2.05639e-09
65.6876	1.34292e-09	2.0948e-09
65.7801	1.21298e-09	2.13392e-09
65.8726	1.09561e-09	2.17377e-09
65.9651	9.89593e-10	2.21437e-09
66.0576	8.93838e-10	2.25572e-09
66.1502	8.07348e-10	2.29785e-09
66.2427	7.29227e-10	2.34077e-09
66.3352	6.58665e-10	2.38448e-09
66.4277	5.94931e-10	2.42901e-09
66.5202	5.37365e-10	2.47438e-09
66.6127	4.85368e-10	2.52059e-09
66.7053	4.38403e-10	2.56766e-09
66.7978	3.95982e-10	2.61562e-09
66.8903	3.57666e-10	2.66446e-09
66.9828	3.23057e-10	2.71423e-09
67.0753	2.91798e-10	2.76492e-09
67.1678	2.63563e-10	2.81655e-09
67.2604	2.3806e-10	2.86915e-09
67.3529	2.15025e-10	2.92274e-09
67.4454	1.94218e-10	2.97732e-09
67.5379	1.75425e-10	3.03293e-09
67.6304	1.58451e-10	3.08957e-09
67.723	1.43119e-10	3.14727e-09
67.8155	1.2927e-10	3.20605e-09
67.908	1.16762e-10	3.26592e-09
68.0005	1.05464e-10	3.32691e-09
68.093	9.52585e-11	3.38905e-09
68.1855	8.60411e-11	3.45234e-09
68.2781	7.77157e-11	3.51682e-09
68.3706	7.01958e-11	3.5825e-09
68.4631	6.34034e-11	3.6494e-09
68.5556	5.72683e-11	3.71756e-09
68.6481	5.1727e-11	3.78698e-09
68.7406	4.67219e-11	3.85771e-09
68.8332	4.22009e-11	3.92976e-09
68.9257	3.81173e-11	4.00315e-09
69.0182	3.44291e-11	4.07791e-09
69.1107	3.10977e-11	4.15407e-09
69.2032	2.80886e-11	4.23165e-09
69.2958	2.53708e-11	4.31068e-09
69.3883	2.29159e-11	4.39118e-09
69.4808	2.06983e-11	4.47319e-09
69.5733	1.86957e-11	4.55673e-09
69.6658	1.68866e-11	4.64183e-09
69.7583	1.52524e-11	4.72852e-09
69.8509	1.37767e-11	4.81683e-09
69.9434	1.24436e-11	4.90679e-09
70.0359	1.12394e-11	4.99843e-09
70.1284	1.01519e-11	5.09178e-09
70.2209	9.16958e-12	5.18687e-09
70.3135	8.28232e-12	5.28374e-09
70.406	7.48092e-12	5.38242e-09
70.4985	6.75717e-12	5.48294e-09
70.591	6.10313e-12	5.58534e-09
70.6835	5.51278e-12	5.68965e-09
70.776	4.97915e-12	5.7959e-09
70.8686	4.49749e-12	5.90415e-09
70.9611	4.06241e-12	6.01441e-09
71.0536	3.66916e-12	6.12674e-09
71.1461	3.31426e-12	6.24116e-09
71.2386	2.99357e-12	6.35772e-09
71.3311	2.70394e-12	6.47645e-09
71.4237	2.4422e-12	6.5974e-09
71.5162	2.20581e-12	6.72062e-09
71.6087	1.99255e-12	6.84613e-09
71.7012	1.79957e-12	6.97399e-09
71.7937	1.6256e-12	7.10423e-09
71.8863	1.46811e-12	7.23691e-09
71.9788	1.32615e-12	7.37206e-09
72.0713	1.19781e-12	7.50974e-09
72.1638	1.08183e-12	7.64999e-09
72.2563	9.77261e-13	7.79286e-09
72.3488	8.8283e-13	7.9384e-09
72.4414	7.97272e-13	8.08666e-09
72.5339	7.2027e-13	8.23768e-09
72.6264	6.50556e-13	8.39153e-09
72.7189	5.87497e-13	8.54824e-09
72.8114	5.30775e-13	8.70789e-09
72.9039	4.79441e-13	8.87052e-09
72.9965	4.32859e-13	9.03618e-09
73.089	3.91031e-13	9.20494e-09
73.1815	3.53322e-13	9.37685e-09
73.274	3.19099e-13	9.55197e-09
73.3665	2.88045e-13	9.73036e-09
73.4591	2.60159e-13	9.91208e-09
73.5516	2.35126e-13	1.00972e-08
73.6441	2.1231e-13	1.02858e-08
73.7366	1.91713e-13	1.04779e-08
73.8291	1.73334e-13	1.06735e-08
73.9216	1.56539e-13	1.08729e-08
74.0142	1.41329e-13	1.10759e-08
74.1067	1.27703e-13	1.12828e-08
74.1992	1.15345e-13	1.14935e-08
74.2917	1.04254e-13	1.17082e-08
74.3842	9.41136e-14	1.19268e-08
74.4767	8.49241e-14	1.21496e-08
74.5693	7.66852e-14	1.23765e-08
74.6618	6.93969e-14	1.26076e-08
74.7543	6.27424e-14	1.28431e-08
74.8468	5.64048e-14	1.30829e-08
74.9393	5.10178e-14	1.33273e-08
75.0319	4.62646e-14	1.35761e-08
75.1244	4.18283e-14	1.38297e-08
75.2169	3.77088e-14	1.4088e-08
75.3094	3.39063e-14	1.43511e-08
75.4019	3.07374e-14	1.46191e-08
75.4944	2.78855e-14	1.48921e-08
75.587	2.50336e-14	1.51702e-08
75.6795	2.24985e-14	1.54536e-08
75.772	2.05973e-14	1.57422e-08
75.8645	1.83791e-14	1.60362e-08
75.957	1.67947e-14	1.63356e-08
76.0495	1.52103e-14	1.66407e-08
76.1421	1.36259e-14	1.69515e-08
76.2346	1.23584e-14	1.72681e-08
76.3271	1.10908e-14	1.75906e-08
76.4196	1.01402e-14	1.79191e-08
76.5121	9.18955e-15	1.82538e-08
76.6047	8.2389e-15	1.85947e-08
76.6972	7.28826e-15	1.89419e-08
76.7897	6.6545e-15	1.92957e-08
76.8822	6.02074e-15	1.96561e-08
76.9747	5.38697e-15	2.00231e-08
77.0672	5.07009e-15	2.03971e-08
77.1598	4.43633e-15	2.0778e-08
77.2523	4.11945e-15	2.11661e-08
77.3448	3.48569e-15	2.15614e-08
77.4373	3.16881e-15	2.1964e-08
77.5298	2.85193e-15	2.23742e-08
77.6223	2.53505e-15	2.27921e-08
77.7149	2.53505e-15	2.32177e-08
77.8074	2.21817e-15	2.36514e-08
77.8999	1.90129e-15	2.40931e-08
77.9924	1.90129e-15	2.4543e-08
78.0849	1.5844e-15	2.50014e-08
78.1775	1.5844e-15	2.54683e-08
78.27	1.26752e-15	2.59439e-08
78.3625	1.26752e-15	2.64285e-08
78.455	9.50643e-16	2.6922e-08
78.5475	9.50643e-16	2.74248e-08
78.64	9.50643e-16	2.7937e-08
78.7326	6.33762e-16	2.84588e-08
78.8251	6.33762e-16	2.89902e-08

## Sheet: profiles
depth	CO2	CH4	SF6	d15N2
0	382.39	1837.16	6.647	1
0.0925177	382.44	1837.27	6.64612	1
0.185035	382.489	1837.39	6.64522	1
0.277553	382.539	1837.5	6.6443	1
0.370071	382.589	1837.62	6.64336	1
0.462588	382.64	1837.74	6.6424	1
0.555106	382.691	1837.86	6.64142	1
0.647624	382.743	1837.98	6.64043	1
0.740142	382.795	1838.1	6.63942	1
0.832659	382.847	1838.22	6.63839	1
0.925177	382.9	1838.34	6.63735	1
1.01769	382.953	1838.47	6.63629	1
1.11021	383.007	1838.59	6.63521	1
1.20273	383.06	1838.72	6.63411	1
1.29525	383.114	1838.85	6.633	1
1.38777	383.168	1838.97	6.63186	1
1.48028	383.222	1839.1	6.63071	1
1.5728	383.276	1839.23	6.62953	1
1.66532	383.33	1839.36	6.62834	1
1.75784	383.384	1839.49	6.62713	1
1.85035	383.438	1839.62	6.6259	1
1.94287	383.491	1839.75	6.62464	1
2.03539	383.545	1839.88	6.62337	1
2.12791	383.599	1840.02	6.62208	1.00001
2.22042	383.653	1840.15	6.62077	1.00001
2.31294	383.706	1840.28	6.61944	1.00001
2.40546	383.76	1840.42	6.61809	1.00001
2.49798	383.813	1840.55	6.61672	1.00001
2.5905	383.867	1840.68	6.61533	1.00001
2.68301	383.92	1840.82	6.61391	1.00001
2.77553	383.973	1840.95	6.61248	1.00001
2.86805	384.026	1841.09	6.61102	1.00001
2.96057	384.079	1841.23	6.60955	1.00001
3.05308	384.132	1841.36	6.60805	1.00001
3.1456	384.185	1841.5	6.60653	1.00001
3.23812	384.237	1841.64	6.60499	1.00001
3.33064	384.29	1841.77	6.60342	1.00001
3.42315	384.342	1841.91	6.60183	1.00001
3.51567	384.394	1842.05	6.60023	1.00001
3.60819	384.445	1842.19	6.59859	1.00001
3.70071	384.497	1842.33	6.59694	1.00001
3.79323	384.548	1842.47	6.59526	1.00001
3.88574	384.599	1842.61	6.59356	1.00001
3.97826	384.649	1842.74	6.59184	1.00001
4.07078	384.7	1842.88	6.59009	1.00001
4.1633	384.75	1843.02	6.58832	1.00001
4.25581	384.8	1843.16	6.58653	1.00001
4.34833	384.849	1843.3	6.58472	1.00001
4.44085	384.899	1843.44	6.58288	1.00001
4.53337	384.947	1843.58	6.58102	1.00001
4.62588	384.996	1843.73	6.57913	1.00001
4.7184	385.044	1843.87	6.57722	1.00001
4.81092	385.092	1844.01	6.57529	1.00001
4.90344	385.14	1844.15	6.57334	1.00001
4.99596	385.187	1844.29	6.57136	1.00001
5.08847	385.234	1844.43	6.56935	1.00001
5.18099	385.28	1844.57	6.56731	1.00001
5.27351	385.326	1844.72	6.56525	1.00001
5.36603	385.372	1844.86	6.56316	1.00001
5.45854	385.417	1845	6.56104	1.00002
5.55106	385.462	1845.14	6.5589	1.00002
5.64358	385.506	1845.28	6.55672	1.00002
5.7361	385.55	1845.43	6.55452	1.00002
5.82861	385.594	1845.57	6.55229	1.00002
5.92113	385.637	1845.71	6.55003	1.00002
6.01365	385.68	1845.85	6.54774	1.00002
6.10617	385.722	1845.99	6.54542	1.00002
6.19869	385.764	1846.14	6.54307	1.00002
6.2912	385.805	1846.28	6.5407	1.00002
6.38372	385.846	1846.42	6.53829	1.00002
6.47624	385.886	1846.56	6.53585	1.00002
6.56876	385.926	1846.71	6.53339	1.00002
6.66127	385.965	1846.85	6.53089	1.00002
6.75379	386.004	1846.99	6.52836	1.00002
6.84631	386.042	1847.13	6.52581	1.00002
6.93883	386.08	1847.27	6.52322	1.00002
7.03135	386.117	1847.41	6.5206	1.00002
7.12386	386.153	1847.56	6.51795	1.00002
7.21638	386.189	1847.7	6.51527	1.00002
7.3089	386.225	1847.84	6.51256	1.00002
7.40142	386.26	1847.98	6.50982	1.00002
7.49393	386.294	1848.12	6.50705	1.00002
7.58645	386.328	1848.26	6.50425	1.00002
7.67897	386.361	1848.4	6.50141	1.00002
7.77149	386.393	1848.54	6.49855	1.00002
7.864	386.425	1848.68	6.49565	1.00002
7.95652	386.457	1848.82	6.49272	1.00002
8.04904	386.484	1848.94	6.4899	1.00002
8.14156	386.509	1849.05	6.48718	1.00003
8.23408	386.532	1849.16	6.48444	1.00003
8.32659	386.556	1849.26	6.48168	1.00003
8.41911	386.578	1849.37	6.47891	1.00003
8.51163	386.601	1849.47	6.47612	1.00003
8.60415	386.622	1849.58	6.47331	1.00003
8.69666	386.643	1849.68	6.47048	1.00003
8.78918	386.663	1849.78	6.46763	1.00003
8.8817	386.683	1849.88	6.46477	1.00003
8.97422	386.702	1849.98	6.46189	1.00003
9.06673	386.72	1850.08	6.45899	1.00003
9.15925	386.738	1850.18	6.45607	1.00003
9.25177	386.755	1850.28	6.45314	1.00003
9.34429	386.772	1850.38	6.45019	1.00003
9.43681	386.788	1850.48	6.44723	1.00003
9.52932	386.803	1850.57	6.44424	1.00003
9.62184	386.818	1850.67	6.44125	1.00003
9.71436	386.832	1850.76	6.43824	1.00003
9.80688	386.845	1850.85	6.43521	1.00003
9.89939	386.858	1850.95	6.43217	1.00003
9.99191	386.871	1851.04	6.42911	1.00003
10.0844	386.883	1851.13	6.42604	1.00003
10.1769	386.894	1851.22	6.42295	1.00003
10.2695	386.905	1851.31	6.41985	1.00003
10.362	386.915	1851.4	6.41674	1.00003
10.4545	386.924	1851.49	6.41361	1.00004
10.547	386.933	1851.58	6.41047	1.00004
10.6395	386.942	1851.66	6.40731	1.00004
10.7321	386.95	1851.75	6.40415	1.00004
10.8246	386.957	1851.83	6.40097	1.00004
10.9171	386.964	1851.92	6.39777	1.00004
11.0096	386.97	1852	6.39457	1.00004
11.1021	386.976	1852.08	6.39135	1.00004
11.1946	386.981	1852.16	6.38813	1.00004
11.2872	386.985	1852.24	6.38489	1.00004
11.3797	386.989	1852.32	6.38164	1.00004
11.4722	386.993	1852.4	6.37837	1.00004
11.5647	386.996	1852.48	6.3751	1.00004
11.6572	386.999	1852.56	6.37182	1.00004
11.7497	387.001	1852.64	6.36852	1.00004
11.8423	387.002	1852.71	6.36522	1.00004
11.9348	387.003	1852.79	6.36191	1.00004
12.0273	387.004	1852.86	6.35858	1.00004
12.1198	387.004	1852.93	6.35525	1.00004
12.2123	387.004	1853.01	6.35191	1.00004
12.3049	387.003	1853.08	6.34856	1.00004
12.3974	387.001	1853.15	6.3452	1.00004
12.4899	387	1853.22	6.34183	1.00004
12.5824	386.997	1853.29	6.33845	1.00004
12.6749	386.995	1853.36	6.33507	1.00004
12.7674	386.992	1853.43	6.33168	1.00005
12.86	386.988	1853.49	6.32828	1.00005
12.9525	386.984	1853.56	6.32487	1.00005
13.045	386.98	1853.62	6.32146	1.00005
13.1375	386.975	1853.69	6.31804	1.00005
13.23	386.969	1853.75	6.31461	1.00005
13.3225	386.964	1853.81	6.31118	1.00005
13.4151	386.957	1853.88	6.30773	1.00005
13.5076	386.951	1853.94	6.30429	1.00005
13.6001	386.944	1854	6.30084	1.00005
13.6926	386.937	1854.06	6.29738	1.00005
13.7851	386.929	1854.12	6.29392	1.00005
13.8777	386.921	1854.17	6.29045	1.00005
13.9702	386.912	1854.23	6.28698	1.00005
14.0627	386.904	1854.29	6.2835	1.00005
14.1552	386.894	1854.34	6.28002	1.00005
14.2477	386.885	1854.4	6.27653	1.00005
14.3402	386.875	1854.45	6.27304	1.00005
14.4328	386.865	1854.5	6.26955	1.00005
14.5253	386.854	1854.56	6.26606	1.00005
14.6178	386.843	1854.61	6.26256	1.00005
14.7103	386.832	1854.66	6.25906	1.00005
14.8028	386.82	1854.71	6.25555	1.00005
14.8953	386.809	1854.76	6.25205	1.00006
14.9879	386.796	1854.81	6.24854	1.00006
15.0804	386.784	1854.85	6.24503	1.00006
15.1729	386.771	1854.9	6.24152	1.00006
15.2654	386.758	1854.95	6.238	1.00006
15.3579	386.744	1854.99	6.23449	1.00006
15.4505	386.731	1855.04	6.23098	1.00006
15.543	386.717	1855.08	6.22746	1.00006
15.6355	386.703	1855.12	6.22395	1.00006
15.728	386.688	1855.17	6.22043	1.00006
15.8205	386.673	1855.21	6.21692	1.00006
15.913	386.658	1855.25	6.21341	1.00006
16.0056	386.643	1855.29	6.2099	1.00006
16.0981	386.628	1855.33	6.20639	1.00006
16.1906	386.612	1855.37	6.20288	1.00006
16.2831	386.596	1855.41	6.19938	1.00006
16.3756	386.58	1855.45	6.19588	1.00006
16.4682	386.563	1855.48	6.19237	1.00006
16.5607	386.546	1855.52	6.18888	1.00006
16.6532	386.53	1855.56	6.18538	1.00006
16.7457	386.513	1855.59	6.18189	1.00006
16.8382	386.495	1855.63	6.1784	1.00006
16.9307	386.478	1855.66	6.17491	1.00006
17.0233	386.46	1855.69	6.17142	1.00007
17.1158	386.442	1855.73	6.16794	1.00007
17.2083	386.424	1855.76	6.16446	1.00007
17.3008	386.406	1855.79	6.16099	1.00007
17.3933	386.387	1855.82	6.15752	1.00007
17.4858	386.369	1855.85	6.15405	1.00007
17.5784	386.35	1855.88	6.15058	1.00007
17.6709	386.331	1855.91	6.14712	1.00007
17.7634	386.312	1855.94	6.14366	1.00007
17.8559	386.292	1855.96	6.1402	1.00007
17.9484	386.273	1855.99	6.13675	1.00007
18.041	386.253	1856.02	6.1333	1.00007
18.1335	386.233	1856.04	6.12986	1.00007
18.226	386.213	1856.07	6.12642	1.00007
18.3185	386.192	1856.09	6.12299	1.00007
18.411	386.172	1856.12	6.11955	1.00007
18.5035	386.151	1856.14	6.11613	1.00007
18.5961	386.13	1856.16	6.1127	1.00007
18.6886	386.109	1856.19	6.10928	1.00007
18.7811	386.087	1856.21	6.10587	1.00007
18.8736	386.066	1856.23	6.10246	1.00007
18.9661	386.044	1856.25	6.09905	1.00007
19.0586	386.022	1856.27	6.09565	1.00007
19.1512	386	1856.29	6.09226	1.00008
19.2437	385.978	1856.31	6.08886	1.00008
19.3362	385.956	1856.33	6.08548	1.00008
19.4287	385.933	1856.34	6.0821	1.00008
19.5212	385.91	1856.36	6.07872	1.00008
19.6138	385.888	1856.38	6.07535	1.00008
19.7063	385.865	1856.39	6.07198	1.00008
19.7988	385.841	1856.41	6.06861	1.00008
19.8913	385.818	1856.42	6.06526	1.00008
19.9838	385.795	1856.44	6.0619	1.00008
20.0763	385.771	1856.45	6.05856	1.00008
20.1689	385.747	1856.46	6.05521	1.00008
20.2614	385.724	1856.48	6.05188	1.00008
20.3539	385.7	1856.49	6.04855	1.00008
20.4464	385.675	1856.5	6.04522	1.00008
20.5389	385.651	1856.51	6.0419	1.00008
20.6314	385.627	1856.52	6.03858	1.00008
20.724	385.602	1856.53	6.03527	1.00008
20.8165	385.578	1856.54	6.03197	1.00008
20.909	385.553	1856.55	6.02867	1.00008
21.0015	385.528	1856.56	6.02537	1.00008
21.094	385.503	1856.57	6.02208	1.00008
21.1866	385.478	1856.57	6.0188	1.00008
21.2791	385.453	1856.58	6.01552	1.00009
21.3716	385.427	1856.59	6.01224	1.00009
21.4641	385.402	1856.59	6.00895	1.00009
21.5566	385.376	1856.6	6.00566	1.00009
21.6491	385.351	1856.6	6.00237	1.00009
21.7417	385.325	1856.61	5.99907	1.00009
21.8342	385.299	1856.61	5.99577	1.00009
21.9267	385.273	1856.62	5.99247	1.00009
22.0192	385.247	1856.62	5.98916	1.00009
22.1117	385.221	1856.62	5.98585	1.00009
22.2042	385.195	1856.62	5.98254	1.00009
22.2968	385.169	1856.63	5.97922	1.00009
22.3893	385.143	1856.63	5.9759	1.00009
22.4818	385.116	1856.63	5.97258	1.00009
22.5743	385.09	1856.63	5.96925	1.00009
22.6668	385.063	1856.63	5.96592	1.00009
22.7594	385.036	1856.63	5.96258	1.00009
22.8519	385.01	1856.63	5.95925	1.00009
22.9444	384.983	1856.63	5.95591	1.00009
23.0369	384.956	1856.62	5.95256	1.00009
23.1294	384.929	1856.62	5.94921	1.00009
23.2219	384.902	1856.62	5.94586	1.00009
23.3145	384.875	1856.61	5.94251	1.00009
23.407	384.848	1856.61	5.93915	1.0001
23.4995	384.821	1856.61	5.93579	1.0001
23.592	384.793	1856.6	5.93242	1.0001
23.6845	384.766	1856.6	5.92905	1.0001
23.777	384.739	1856.59	5.92568	1.0001
23.8696	384.711	1856.59	5.92231	1.0001
23.9621	384.684	1856.58	5.91893	1.0001
24.0546	384.656	1856.57	5.91554	1.0001
24.1471	384.629	1856.57	5.91216	1.0001
24.2396	384.601	1856.56	5.90877	1.0001
24.3322	384.573	1856.55	5.90538	1.0001
24.4247	384.546	1856.54	5.90198	1.0001
24.5172	384.518	1856.53	5.89858	1.0001
24.6097	384.49	1856.53	5.89518	1.0001
24.7022	384.462	1856.52	5.89178	1.0001
24.7947	384.435	1856.51	5.88837	1.0001
24.8873	384.407	1856.5	5.88496	1.0001
24.9798	384.379	1856.49	5.88154	1.0001
25.0723	384.351	1856.48	5.87812	1.0001
25.1648	384.323	1856.46	5.8747	1.0001
25.2573	384.295	1856.45	5.87127	1.0001
25.3498	384.267	1856.44	5.86784	1.0001
25.4424	384.239	1856.43	5.86441	1.00011
25.5349	384.211	1856.42	5.86098	1.00011
25.6274	384.183	1856.4	5.85754	1.00011
25.7199	384.154	1856.39	5.85409	1.00011
25.8124	384.126	1856.38	5.85065	1.00011
25.905	384.098	1856.36	5.8472	1.00011
25.9975	384.07	1856.35	5.84375	1.00011
26.09	384.042	1856.33	5.84029	1.00011
26.1825	384.014	1856.32	5.83683	1.00011
26.275	383.985	1856.3	5.83337	1.00011
26.3675	383.957	1856.29	5.8299	1.00011
26.4601	383.929	1856.27	5.82643	1.00011
26.5526	383.901	1856.25	5.82296	1.00011
26.6451	383.872	1856.24	5.81948	1.00011
26.7376	383.844	1856.22	5.816	1.00011
26.8301	383.816	1856.2	5.81252	1.00011
26.9227	383.788	1856.18	5.80903	1.00011
27.0152	383.759	1856.17	5.80554	1.00011
27.1077	383.731	1856.15	5.80205	1.00011
27.2002	383.703	1856.13	5.79855	1.00011
27.2927	383.675	1856.11	5.79505	1.00011
27.3852	383.646	1856.09	5.79155	1.00011
27.4778	383.618	1856.07	5.78804	1.00011
27.5703	383.59	1856.05	5.78453	1.00012
27.6628	383.562	1856.03	5.78102	1.00012
27.7553	383.533	1856.01	5.7775	1.00012
27.8478	383.505	1855.99	5.77398	1.00012
27.9403	383.477	1855.97	5.77046	1.00012
28.0329	383.449	1855.95	5.76693	1.00012
28.1254	383.42	1855.93	5.7634	1.00012
28.2179	383.392	1855.91	5.75986	1.00012
28.3104	383.364	1855.88	5.75632	1.00012
28.4029	383.336	1855.86	5.75278	1.00012
28.4955	383.308	1855.84	5.74924	1.00012
28.588	383.28	1855.82	5.74569	1.00012
28.6805	383.251	1855.79	5.74213	1.00012
28.773	383.223	1855.77	5.73858	1.00012
28.8655	383.195	1855.75	5.73502	1.00012
28.958	383.167	1855.72	5.73146	1.00012
29.0506	383.139	1855.7	5.72789	1.00012
29.1431	383.111	1855.67	5.72432	1.00012
29.2356	383.083	1855.65	5.72074	1.00012
29.3281	383.055	1855.62	5.71717	1.00012
29.4206	383.027	1855.6	5.71359	1.00012
29.5131	382.999	1855.57	5.71	1.00012
29.6057	382.971	1855.55	5.70641	1.00013
29.6982	382.943	1855.52	5.70282	1.00013
29.7907	382.916	1855.5	5.69923	1.00013
29.8832	382.888	1855.47	5.69563	1.00013
29.9757	382.86	1855.44	5.69202	1.00013
30.0683	382.832	1855.42	5.68842	1.00013
30.1608	382.804	1855.39	5.68481	1.00013
30.2533	382.777	1855.36	5.68119	1.00013
30.3458	382.749	1855.33	5.67758	1.00013
30.4383	382.721	1855.31	5.67395	1.00013
30.5308	382.694	1855.28	5.67033	1.00013
30.6234	382.666	1855.25	5.6667	1.00013
30.7159	382.639	1855.22	5.66307	1.00013
30.8084	382.611	1855.19	5.65943	1.00013
30.9009	382.584	1855.16	5.65579	1.00013
30.9934	382.556	1855.14	5.65215	1.00013
31.0859	382.529	1855.11	5.6485	1.00013
31.1785	382.501	1855.08	5.64485	1.00013
31.271	382.474	1855.05	5.6412	1.00013
31.3635	382.447	1855.02	5.63754	1.00013
31.456	382.419	1854.99	5.63387	1.00013
31.5485	382.392	1854.96	5.63021	1.00013
31.6411	382.365	1854.93	5.62654	1.00013
31.7336	382.338	1854.9	5.62286	1.00014
31.8261	382.311	1854.87	5.61919	1.00014
31.9186	382.283	1854.84	5.6155	1.00014
32.0111	382.256	1854.81	5.61182	1.00014
32.1036	382.229	1854.77	5.60813	1.00014
32.1962	382.202	1854.74	5.60444	1.00014
32.2887	382.176	1854.71	5.60074	1.00014
32.3812	382.149	1854.68	5.59704	1.00014
32.4737	382.122	1854.65	5.59333	1.00014
32.5662	382.095	1854.62	5.58962	1.00014
32.6587	382.068	1854.58	5.58591	1.00014
32.7513	382.042	1854.55	5.58219	1.00014
32.8438	382.015	1854.52	5.57847	1.00014
32.9363	381.988	1854.49	5.57475	1.00014
33.0288	381.962	1854.45	5.57102	1.00014
33.1213	381.935	1854.42	5.56728	1.00014
33.2139	381.909	1854.39	5.56355	1.00014
33.3064	381.882	1854.35	5.55981	1.00014
33.3989	381.856	1854.32	5.55606	1.00014
33.4914	381.829	1854.29	5.55231	1.00014
33.5839	381.803	1854.25	5.54856	1.00014
33.6764	381.777	1854.22	5.5448	1.00014
33.769	381.751	1854.19	5.54104	1.00014
33.8615	381.724	1854.15	5.53727	1.00015
33.954	381.698	1854.12	5.5335	1.00015
34.0465	381.672	1854.08	5.52973	1.00015
34.139	381.646	1854.05	5.52595	1.00015
34.2315	381.62	1854.01	5.52217	1.00015
34.3241	381.594	1853.98	5.51838	1.00015
34.4166	381.568	1853.95	5.51459	1.00015
34.5091	381.542	1853.91	5.5108	1.00015
34.6016	381.516	1853.88	5.507	1.00015
34.6941	381.491	1853.84	5.50319	1.00015
34.7867	381.465	1853.81	5.49939	1.00015
34.8792	381.439	1853.77	5.49557	1.00015
34.9717	381.414	1853.73	5.49176	1.00015
35.0642	381.388	1853.7	5.48794	1.00015
35.1567	381.363	1853.66	5.48411	1.00015
35.2492	381.337	1853.63	5.48028	1.00015
35.3418	381.312	1853.59	5.47645	1.00015
35.4343	381.286	1853.56	5.47261	1.00015
35.5268	381.261	1853.52	5.46877	1.00015
35.6193	381.236	1853.48	5.46492	1.00015
35.7118	381.21	1853.45	5.46107	1.00015
35.8043	381.185	1853.41	5.45721	1.00015
35.8969	381.16	1853.38	5.45335	1.00016
35.9894	381.135	1853.34	5.44949	1.00016
36.0819	381.11	1853.3	5.44562	1.00016
36.1744	381.085	1853.27	5.44175	1.00016
36.2669	381.06	1853.23	5.43787	1.00016
36.3595	381.035	1853.19	5.43399	1.00016
36.452	381.01	1853.16	5.4301	1.00016
36.5445	380.985	1853.12	5.42621	1.00016
36.637	380.96	1853.08	5.42231	1.00016
36.7295	380.936	1853.05	5.41841	1.00016
36.822	380.911	1853.01	5.41451	1.00016
36.9146	380.886	1852.97	5.4106	1.00016
37.0071	380.862	1852.93	5.40668	1.00016
37.0996	380.837	1852.9	5.40276	1.00016
37.1921	380.812	1852.86	5.39884	1.00016
37.2846	380.788	1852.82	5.39491	1.00016
37.3772	380.764	1852.79	5.39098	1.00016
37.4697	380.739	1852.75	5.38704	1.00016
37.5622	380.715	1852.71	5.3831	1.00016
37.6547	380.69	1852.67	5.37915	1.00016
37.7472	380.666	1852.64	5.3752	1.00016
37.8397	380.642	1852.6	5.37124	1.00016
37.9323	380.618	1852.56	5.36728	1.00016
38.0248	380.594	1852.52	5.36331	1.00017
38.1173	380.57	1852.49	5.35934	1.00017
38.2098	380.545	1852.45	5.35537	1.00017
38.3023	380.521	1852.41	5.35138	1.00017
38.3948	380.497	1852.37	5.3474	1.00017
38.4874	380.474	1852.33	5.34341	1.00017
38.5799	380.45	1852.3	5.33941	1.00017
38.6724	380.426	1852.26	5.33541	1.00017
38.7649	380.402	1852.22	5.33141	1.00017
38.8574	380.378	1852.18	5.3274	1.00017
38.95	380.354	1852.15	5.32338	1.00017
39.0425	380.331	1852.11	5.31936	1.00017
39.135	380.307	1852.07	5.31533	1.00017
39.2275	380.283	1852.03	5.3113	1.00017
39.32	380.26	1851.99	5.30727	1.00017
39.4125	380.236	1851.96	5.30323	1.00017
39.5051	380.213	1851.92	5.29918	1.00017
39.5976	380.189	1851.88	5.29513	1.00017
39.6901	380.166	1851.84	5.29107	1.00017
39.7826	380.142	1851.8	5.28701	1.00017
39.8751	380.119	1851.77	5.28295	1.00017
39.9676	380.096	1851.73	5.27887	1.00017
40.0602	380.072	1851.69	5.2748	1.00017
40.1527	380.049	1851.65	5.27071	1.00018
40.2452	380.026	1851.62	5.26663	1.00018
40.3377	380.003	1851.58	5.26253	1.00018
40.4302	379.979	1851.54	5.25844	1.00018
40.5228	379.956	1851.5	5.25433	1.00018
40.6153	379.933	1851.46	5.25022	1.00018
40.7078	379.91	1851.43	5.24611	1.00018
40.8003	379.887	1851.39	5.24199	1.00018
40.8928	379.864	1851.35	5.23787	1.00018
40.9853	379.841	1851.31	5.23374	1.00018
41.0779	379.818	1851.28	5.2296	1.00018
41.1704	379.795	1851.24	5.22546	1.00018
41.2629	379.772	1851.2	5.22131	1.00018
41.3554	379.749	1851.16	5.21716	1.00018
41.4479	379.726	1851.13	5.213	1.00018
41.5404	379.703	1851.09	5.20884	1.00018
41.633	379.68	1851.05	5.20467	1.00018
41.7255	379.658	1851.01	5.2005	1.00018
41.818	379.635	1850.98	5.19632	1.00018
41.9105	379.612	1850.94	5.19213	1.00018
42.003	379.589	1850.9	5.18794	1.00018
42.0956	379.567	1850.86	5.18374	1.00018
42.1881	379.544	1850.83	5.17954	1.00019
42.2806	379.521	1850.79	5.17533	1.00019
42.3731	379.499	1850.75	5.17112	1.00019
42.4656	379.476	1850.72	5.1669	1.00019
42.5581	379.453	1850.68	5.16267	1.00019
42.6507	379.431	1850.64	5.15844	1.00019
42.7432	379.408	1850.6	5.1542	1.00019
42.8357	379.385	1850.57	5.14996	1.00019
42.9282	379.363	1850.53	5.14571	1.00019
43.0207	379.34	1850.49	5.14145	1.00019
43.1132	379.318	1850.46	5.13719	1.00019
43.2058	379.295	1850.42	5.13292	1.00019
43.2983	379.273	1850.38	5.12865	1.00019
43.3908	379.25	1850.35	5.12437	1.00019
43.4833	379.227	1850.31	5.12009	1.00019
43.5758	379.205	1850.28	5.1158	1.00019
43.6684	379.182	1850.24	5.1115	1.00019
43.7609	379.16	1850.2	5.10719	1.00019
43.8534	379.137	1850.17	5.10288	1.00019
43.9459	379.115	1850.13	5.09857	1.00019
44.0384	379.093	1850.09	5.09425	1.00019
44.1309	379.07	1850.06	5.08992	1.00019
44.2235	379.048	1850.02	5.08558	1.00019
44.316	379.025	1849.99	5.08124	1.0002
44.4085	379.003	1849.95	5.07689	1.0002
44.501	378.98	1849.92	5.07254	1.0002
44.5935	378.958	1849.88	5.06818	1.0002
44.686	378.935	1849.84	5.06381	1.0002
44.7786	378.913	1849.81	5.05944	1.0002
44.8711	378.89	1849.77	5.05506	1.0002
44.9636	378.868	1849.74	5.05067	1.0002
45.0561	378.845	1849.7	5.04628	1.0002
45.1486	378.823	1849.67	5.04188	1.0002
45.2412	378.8	1849.63	5.03748	1.0002
45.3337	378.778	1849.6	5.03306	1.0002
45.4262	378.755	1849.56	5.02865	1.0002
45.5187	378.733	1849.53	5.02422	1.0002
45.6112	378.71	1849.5	5.01979	1.0002
45.7037	378.688	1849.46	5.01535	1.0002
45.7963	378.665	1849.43	5.0109	1.0002
45.8888	378.643	1849.39	5.00645	1.0002
45.9813	378.62	1849.36	5.00199	1.0002
46.0738	378.597	1849.32	4.99752	1.0002
46.1663	378.575	1849.29	4.99305	1.0002
46.2588	378.552	1849.26	4.98857	1.0002
46.3514	378.529	1849.22	4.98408	1.0002
46.4439	378.507	1849.19	4.97959	1.00021
46.5364	378.484	1849.16	4.97509	1.00021
46.6289	378.461	1849.12	4.97058	1.00021
46.7214	378.439	1849.09	4.96606	1.00021
46.814	378.416	1849.06	4.96154	1.00021
46.9065	378.393	1849.02	4.95701	1.00021
46.999	378.37	1848.99	4.95247	1.00021
47.0915	378.348	1848.96	4.94792	1.00021
47.184	378.325	1848.92	4.94337	1.00021
47.2765	378.302	1848.89	4.93881	1.00021
47.3691	378.279	1848.86	4.93425	1.00021
47.4616	378.256	1848.82	4.92967	1.00021
47.5541	378.233	1848.79	4.92509	1.00021
47.6466	378.21	1848.76	4.9205	1.00021
47.7391	378.187	1848.73	4.9159	1.00021
47.8316	378.164	1848.7	4.9113	1.00021
47.9242	378.141	1848.66	4.90668	1.00021
48.0167	378.118	1848.63	4.90206	1.00021
48.1092	378.095	1848.6	4.89744	1.00021
48.2017	378.072	1848.57	4.8928	1.00021
48.2942	378.048	1848.54	4.88816	1.00021
48.3868	378.025	1848.5	4.88351	1.00021
48.4793	378.002	1848.47	4.87885	1.00022
48.5718	377.979	1848.44	4.87418	1.00022
48.6643	377.955	1848.41	4.8695	1.00022
48.7568	377.932	1848.38	4.86482	1.00022
48.8493	377.908	1848.35	4.86013	1.00022
48.9419	377.885	1848.32	4.85543	1.00022
49.0344	377.861	1848.29	4.85072	1.00022
49.1269	377.838	1848.26	4.846	1.00022
49.2194	377.814	1848.23	4.84128	1.00022
49.3119	377.79	1848.2	4.83654	1.00022
49.4045	377.767	1848.17	4.8318	1.00022
49.497	377.743	1848.13	4.82705	1.00022
49.5895	377.719	1848.1	4.82229	1.00022
49.682	377.695	1848.07	4.81752	1.00022
49.7745	377.671	1848.04	4.81275	1.00022
49.867	377.647	1848.02	4.80796	1.00022
49.9596	377.623	1847.99	4.80317	1.00022
50.0521	377.599	1847.96	4.79836	1.00022
50.1446	377.575	1847.93	4.79355	1.00022
50.2371	377.551	1847.9	4.78873	1.00022
50.3296	377.526	1847.87	4.7839	1.00022
50.4221	377.502	1847.84	4.77906	1.00022
50.5147	377.478	1847.81	4.77421	1.00022
50.6072	377.453	1847.78	4.76935	1.00023
50.6997	377.429	1847.75	4.76448	1.00023
50.7922	377.404	1847.72	4.75961	1.00023
50.8847	377.379	1847.69	4.75472	1.00023
50.9773	377.355	1847.67	4.74982	1.00023
51.0698	377.33	1847.64	4.74492	1.00023
51.1623	377.305	1847.61	4.74	1.00023
51.2548	377.28	1847.58	4.73507	1.00023
51.3473	377.255	1847.55	4.73014	1.00023
51.4398	377.23	1847.52	4.72519	1.00023
51.5324	377.205	1847.5	4.72024	1.00023
51.6249	377.18	1847.47	4.71527	1.00023
51.7174	377.154	1847.44	4.71029	1.00023
51.8099	377.129	1847.41	4.70531	1.00023
51.9024	377.104	1847.38	4.70031	1.00023
51.9949	377.078	1847.36	4.6953	1.00023
52.0875	377.052	1847.33	4.69028	1.00023
52.18	377.027	1847.3	4.68525	1.00023
52.2725	377.001	1847.27	4.68021	1.00023
52.365	376.975	1847.25	4.67516	1.00023
52.4575	376.949	1847.22	4.67009	1.00023
52.5501	376.923	1847.19	4.66502	1.00023
52.6426	376.897	1847.17	4.65993	1.00023
52.7351	376.871	1847.14	4.65484	1.00024
52.8276	376.845	1847.11	4.64973	1.00024
52.9201	376.818	1847.09	4.64461	1.00024
53.0126	376.792	1847.06	4.63947	1.00024
53.1052	376.765	1847.03	4.63433	1.00024
53.1977	376.739	1847.01	4.62917	1.00024
53.2902	376.712	1846.98	4.624	1.00024
53.3827	376.685	1846.95	4.61882	1.00024
53.4752	376.658	1846.93	4.61362	1.00024
53.5677	376.631	1846.9	4.60841	1.00024
53.6603	376.604	1846.87	4.60319	1.00024
53.7528	376.576	1846.85	4.59796	1.00024
53.8453	376.549	1846.82	4.59271	1.00024
53.9378	376.522	1846.79	4.58745	1.00024
54.0303	376.494	1846.77	4.58217	1.00024
54.1229	376.466	1846.74	4.57688	1.00024
54.2154	376.439	1846.72	4.57158	1.00024
54.3079	376.411	1846.69	4.56626	1.00024
54.4004	376.383	1846.66	4.56093	1.00024
54.4929	376.354	1846.64	4.55558	1.00024
54.5854	376.326	1846.61	4.55022	1.00024
54.678	376.298	1846.59	4.54485	1.00024
54.7705	376.269	1846.56	4.53945	1.00024
54.863	376.241	1846.54	4.53404	1.00025
54.9555	376.212	1846.51	4.52862	1.00025
55.048	376.183	1846.48	4.52318	1.00025
55.1405	376.154	1846.46	4.51772	1.00025
55.2331	376.125	1846.43	4.51225	1.00025
55.3256	376.095	1846.41	4.50675	1.00025
55.4181	376.066	1846.38	4.50124	1.00025
55.5106	376.037	1846.36	4.49572	1.00025
55.6031	376.007	1846.33	4.49017	1.00025
55.6957	375.977	1846.3	4.48461	1.00025
55.7882	375.947	1846.28	4.47903	1.00025
55.8807	375.917	1846.25	4.47342	1.00025
55.9732	375.886	1846.23	4.4678	1.00025
56.0657	375.856	1846.2	4.46216	1.00025
56.1582	375.825	1846.18	4.4565	1.00025
56.2508	375.795	1846.15	4.45081	1.00025
56.3433	375.764	1846.12	4.44511	1.00025
56.4358	375.733	1846.1	4.43938	1.00025
56.5283	375.701	1846.07	4.43363	1.00025
56.6208	375.67	1846.05	4.42785	1.00025
56.7133	375.638	1846.02	4.42205	1.00025
56.8059	375.606	1845.99	4.41623	1.00025
56.8984	375.574	1845.97	4.41039	1.00025
56.9909	375.542	1845.94	4.40451	1.00026
57.0834	375.51	1845.91	4.39861	1.00026
57.1759	375.477	1845.89	4.39268	1.00026
57.2685	375.444	1845.86	4.38673	1.00026
57.361	375.411	1845.83	4.38075	1.00026
57.4535	375.378	1845.81	4.37473	1.00026
57.546	375.344	1845.78	4.36869	1.00026
57.6385	375.311	1845.75	4.36261	1.00026
57.731	375.277	1845.73	4.3565	1.00026
57.8236	375.242	1845.7	4.35036	1.00026
57.9161	375.208	1845.67	4.34418	1.00026
58.0086	375.173	1845.64	4.33796	1.00026
58.1011	375.138	1845.61	4.33171	1.00026
58.1936	375.103	1845.59	4.32541	1.00026
58.2861	375.067	1845.56	4.31908	1.00026
58.3787	375.031	1845.53	4.3127	1.00026
58.4712	374.995	1845.5	4.30628	1.00026
58.5637	374.959	1845.47	4.29981	1.00026
58.6562	374.922	1845.44	4.2933	1.00026
58.7487	374.884	1845.41	4.28673	1.00026
58.8413	374.847	1845.38	4.28011	1.00026
58.9338	374.809	1845.35	4.27343	1.00026
59.0263	374.77	1845.32	4.2667	1.00026
59.1188	374.731	1845.29	4.2599	1.00027
59.2113	374.692	1845.25	4.25304	1.00027
59.3038	374.652	1845.22	4.24611	1.00027
59.3964	374.612	1845.19	4.23911	1.00027
59.4889	374.571	1845.16	4.23203	1.00027
59.5814	374.53	1845.12	4.22486	1.00027
59.6739	374.488	1845.09	4.21762	1.00027
59.7664	374.445	1845.05	4.21027	1.00027
59.859	374.402	1845.01	4.20283	1.00027
59.9515	374.358	1844.98	4.19528	1.00027
60.044	374.313	1844.94	4.18762	1.00027
60.1365	374.267	1844.9	4.17983	1.00027
60.229	374.221	1844.86	4.17191	1.00027
60.3215	374.173	1844.82	4.16384	1.00027
60.4141	374.124	1844.78	4.15561	1.00027
60.5066	374.075	1844.73	4.14721	1.00027
60.5991	374.023	1844.69	4.13861	1.00027
60.6916	373.971	1844.64	4.1298	1.00027
60.7841	373.917	1844.59	4.12076	1.00027
60.8766	373.861	1844.54	4.11145	1.00027
60.9692	373.803	1844.48	4.10184	1.00027
61.0617	373.743	1844.43	4.09188	1.00027
61.1542	373.68	1844.37	4.08154	1.00027
61.2467	373.614	1844.3	4.07074	1.00028
61.3392	373.544	1844.24	4.05941	1.00028
61.4318	373.471	1844.16	4.04745	1.00028
61.5243	373.392	1844.08	4.03472	1.00028
61.6168	373.307	1843.99	4.02105	1.00028
61.7093	373.215	1843.9	4.00619	1.00028
61.8018	373.112	1843.79	3.98978	1.00028
61.8943	372.995	1843.66	3.97125	1.00028
61.9869	372.858	1843.51	3.94972	1.00028
62.0794	372.702	1843.33	3.9253	1.00028
62.1719	372.535	1843.13	3.89935	1.00028
62.2644	372.357	1842.92	3.87187	1.00028
62.3569	372.168	1842.69	3.84282	1.00028
62.4494	371.968	1842.43	3.81215	1.00028
62.542	371.755	1842.16	3.7798	1.00028
62.6345	371.529	1841.85	3.74575	1.00028
62.727	371.29	1841.53	3.70995	1.00028
62.8195	371.038	1841.17	3.67237	1.00028
62.912	370.771	1840.78	3.633	1.00028
63.0046	370.49	1840.35	3.5918	1.00028
63.0971	370.194	1839.89	3.54878	1.00028
63.1896	369.882	1839.38	3.50393	1.00028
63.2821	369.555	1838.83	3.45727	1.00028
63.3746	369.213	1838.24	3.40879	1.00028
63.4671	368.854	1837.59	3.35855	1.00028
63.5597	368.479	1836.88	3.30656	1.00028
63.6522	368.087	1836.11	3.25289	1.00028
63.7447	367.679	1835.28	3.19759	1.00028
63.8372	367.255	1834.38	3.14073	1.00029
63.9297	366.814	1833.41	3.0824	1.00029
64.0222	366.358	1832.35	3.02268	1.00029
64.1148	365.885	1831.22	2.96168	1.00029
64.2073	365.397	1829.99	2.8995	1.00029
64.2998	364.894	1828.67	2.83628	1.00029
64.3923	364.376	1827.25	2.77214	1.00029
64.4848	363.843	1825.72	2.70721	1.00029
64.5774	363.297	1824.09	2.64163	1.00029
64.6699	362.738	1822.34	2.57554	1.00029
64.7624	362.167	1820.47	2.50909	1.00029
64.8549	361.585	1818.48	2.44243	1.00029
64.9474	360.991	1816.36	2.37569	1.00029
65.0399	360.388	1814.11	2.30903	1.00029
65.1325	359.775	1811.72	2.24258	1.00029
65.225	359.154	1809.18	2.17648	1.00029
65.3175	358.526	1806.51	2.11085	1.00029
65.41	357.891	1803.69	2.04583	1.00029
65.5025	357.25	1800.71	1.98151	1.00029
65.595	356.604	1797.58	1.91801	1.00029
65.6876	355.953	1794.3	1.85542	1.00029
65.7801	355.299	1790.86	1.79384	1.00029
65.8726	354.641	1787.26	1.73333	1.00029
65.9651	353.981	1783.49	1.67398	1.00029
66.0576	353.32	1779.57	1.61584	1.00029
66.1502	352.657	1775.48	1.55895	1.00029
66.2427	351.994	1771.23	1.50338	1.00029
66.3352	351.33	1766.82	1.44914	1.00029
66.4277	350.667	1762.25	1.39627	1.00029
66.5202	350.004	1757.52	1.34478	1.00029
66.6127	349.343	1752.64	1.2947	1.00029
66.7053	348.683	1747.61	1.24603	1.00029
66.7978	348.026	1742.43	1.19877	1.00029
66.8903	347.37	1737.1	1.15292	1.00029
66.9828	346.718	1731.64	1.10847	1.00029
67.0753	346.069	1726.04	1.06542	1.00029
67.1678	345.423	1720.31	1.02374	1.00029
67.2604	344.781	1714.47	0.983425	1.00029
67.3529	344.143	1708.5	0.944452	1.00029
67.4454	343.509	1702.43	0.9068	1.00029
67.5379	342.881	1696.25	0.870442	1.00029
67.6304	342.257	1689.98	0.835356	1.00029
67.723	341.638	1683.62	0.801512	1.00029
67.8155	341.025	1677.18	0.768884	1.00029
67.908	340.418	1670.66	0.737443	1.00029
68.0005	339.816	1664.08	0.707158	1.00029
68.093	339.221	1657.44	0.678	1.00029
68.1855	338.632	1650.74	0.649937	1.00029
68.2781	338.05	1644	0.622941	1.00029
68.3706	337.474	1637.21	0.596978	1.00029
68.4631	336.906	1630.4	0.57202	1.00029
68.5556	336.344	1623.56	0.548035	1.00029
68.6481	335.789	1616.7	0.524992	1.00029
68.7406	335.242	1609.82	0.502862	1.00029
68.8332	334.702	1602.94	0.481614	1.00029
68.9257	334.17	1596.05	0.461221	1.00029
69.0182	333.645	1589.17	0.441651	1.00029
69.1107	333.128	1582.3	0.422878	1.00029
69.2032	332.619	1575.44	0.404873	1.00029
69.2958	332.117	1568.6	0.387609	1.00029
69.3883	331.623	1561.78	0.371059	1.00029
69.4808	331.137	1554.98	0.355197	1.00029
69.5733	330.658	1548.22	0.339998	1.00029
69.6658	330.188	1541.5	0.325438	1.00029
69.7583	329.725	1534.81	0.311491	1.00029
69.8509	329.27	1528.16	0.298135	1.00029
69.9434	328.822	1521.56	0.285347	1.00029
70.0359	328.382	1515.01	0.273104	1.00029
70.1284	327.95	1508.5	0.261386	1.00029
70.2209	327.525	1502.05	0.250171	1.00029
70.3135	327.108	1495.66	0.239439	1.00029
70.406	326.699	1489.32	0.229172	1.00029
70.4985	326.296	1483.05	0.219349	1.00029
70.591	325.901	1476.83	0.209954	1.00029
70.6835	325.514	1470.68	0.200968	1.00029
70.776	325.133	1464.6	0.192375	1.00029
70.8686	324.76	1458.58	0.184158	1.00029
70.9611	324.394	1452.63	0.176301	1.00029
71.0536	324.035	1446.75	0.16879	1.00029
71.1461	323.682	1440.95	0.16161	1.00029
71.2386	323.337	1435.21	0.154747	1.00029
71.3311	322.998	1429.55	0.148186	1.00029
71.4237	322.666	1423.96	0.141917	1.00029
71.5162	322.34	1418.44	0.135925	1.00029
71.6087	322.021	1413.01	0.130199	1.00029
71.7012	321.708	1407.64	0.124727	1.00029
71.7937	321.402	1402.36	0.119499	1.00029
71.8863	321.102	1397.15	0.114503	1.00029
71.9788	320.808	1392.03	0.109731	1.00029
72.0713	320.52	1386.98	0.105171	1.00029
72.1638	320.238	1382.01	0.100814	1.00029
72.2563	319.963	1377.12	0.0966527	1.00029
72.3488	319.693	1372.31	0.0926771	1.00029
72.4414	319.428	1367.58	0.0888794	1.00029
72.5339	319.17	1362.93	0.0852517	1.00029
72.6264	318.917	1358.36	0.0817865	1.00029
72.7189	318.67	1353.87	0.0784767	1.00029
72.8114	318.428	1349.46	0.0753153	1.00029
72.9039	318.192	1345.14	0.0722958	1.00029
72.9965	317.961	1340.89	0.0694119	1.00029
73.089	317.735	1336.73	0.0666576	1.00029
73.1815	317.515	1332.65	0.0640272	1.00029
73.274	317.3	1328.65	0.0615151	1.00029
73.3665	317.09	1324.73	0.0591162	1.00029
73.4591	316.884	1320.89	0.0568253	1.00029
73.5516	316.684	1317.14	0.0546378	1.00029
73.6441	316.489	1313.46	0.0525491	1.00029
73.7366	316.299	1309.87	0.0505548	1.00029
73.8291	316.114	1306.36	0.0486508	1.00029
73.9216	315.933	1302.92	0.0468331	1.00029
74.0142	315.757	1299.57	0.0450979	1.00029
74.1067	315.586	1296.3	0.0434416	1.00029
74.1992	315.419	1293.11	0.0418608	1.00029
74.2917	315.257	1289.99	0.0403522	1.00029
74.3842	315.1	1286.96	0.0389126	1.00029
74.4767	314.946	1284.01	0.037539	1.00029
74.5693	314.798	1281.13	0.0362287	1.00029
74.6618	314.653	1278.33	0.0349789	1.00029
74.7543	314.513	1275.61	0.0337871	1.00029
74.8468	314.377	1272.97	0.0326507	1.00029
74.9393	314.246	1270.41	0.0315674	1.00029
75.0319	314.118	1267.92	0.030535	1.00029
75.1244	313.995	1265.51	0.0295514	1.00029
75.2169	313.875	1263.17	0.0286145	1.00029
75.3094	313.76	1260.91	0.0277225	1.00029
75.4019	313.649	1258.72	0.0268734	1.00029
75.4944	313.541	1256.61	0.0260655	1.00029
75.587	313.438	1254.57	0.0252972	1.00029
75.6795	313.338	1252.6	0.0245669	1.00029
75.772	313.242	1250.7	0.023873	1.00029
75.8645	313.149	1248.88	0.0232141	1.00029
75.957	313.061	1247.12	0.022589	1.00029
76.0495	312.976	1245.44	0.0219962	1.00029
76.1421	312.894	1243.82	0.0214345	1.00029
76.2346	312.816	1242.28	0.0209028	1.00029
76.3271	312.742	1240.8	0.0203999	1.00029
76.4196	312.671	1239.38	0.0199248	1.00029
76.5121	312.603	1238.04	0.0194764	1.00029
76.6047	312.539	1236.75	0.0190538	1.00029
76.6972	312.478	1235.54	0.0186561	1.00029
76.7897	312.42	1234.38	0.0182823	1.00029
76.8822	312.365	1233.29	0.0179318	1.00029
76.9747	312.313	1232.26	0.0176035	1.00029
77.0672	312.265	1231.29	0.0172969	1.00029
77.1598	312.219	1230.38	0.0170112	1.00029
77.2523	312.177	1229.53	0.0167458	1.00029
77.3448	312.137	1228.74	0.0164998	1.00029
77.4373	312.1	1228	0.0162728	1.00029
77.5298	312.066	1227.32	0.0160641	1.00029
77.6223	312.035	1226.69	0.0158732	1.00029
77.7149	312.007	1226.12	0.0156996	1.00029
77.8074	311.981	1225.6	0.0155426	1.00029
77.8999	311.957	1225.14	0.0154019	1.00029
77.9924	311.937	1224.72	0.015277	1.00029
78.0849	311.918	1224.35	0.0151673	1.00029
78.1775	311.903	1224.04	0.0150725	1.00029
78.27	311.889	1223.77	0.0149922	1.00029
78.3625	311.878	1223.55	0.0149259	1.00029
78.455	311.869	1223.37	0.0148733	1.00029
78.5475	311.863	1223.24	0.0148339	1.00029
78.64	311.858	1223.15	0.0148072	1.00029
78.7326	311.856	1223.1	0.0147923	1.00029

## Sheet: scenarios
depth	SCEN1	SCEN2	SCEN3	SCEN4
0	0	1	1	0
0.0925177	-1.17139e-05	0.999631	1	2.34913
0.185035	-2.38765e-05	0.999253	1	4.69319
0.277553	-3.63822e-05	0.998869	1	7.03207
0.370071	-4.92575e-05	0.998479	1	9.36578
0.462588	-6.2476e-05	0.998084	1	11.6943
0.555106	-7.61169e-05	0.997683	1	14.0177
0.647624	-9.0101e-05	0.997276	1	16.3359
0.740142	-0.000104481	0.996864	1	18.6489
0.832659	-0.000119257	0.996446	1	20.9567
0.925177	-0.000134456	0.996022	1	23.2594
1.01769	-0.000150024	0.995592	1	25.5569
1.11021	-0.000166041	0.995156	1	27.8492
1.20273	-0.000182454	0.994715	1	30.1363
1.29525	-0.000199289	0.994268	1	32.4183
1.38777	-0.0002166	0.993815	1	34.6951
1.48028	-0.000234307	0.993356	1	36.9667
1.5728	-0.000252489	0.992892	1	39.2332
1.66532	-0.000271094	0.992421	1	41.4944
1.75784	-0.000290174	0.991945	1	43.7505
1.85035	-0.00030973	0.991463	1	46.0015
1.94287	-0.000329734	0.990975	1	48.2472
2.03539	-0.000350241	0.990481	1	50.4878
2.12791	-0.000371222	0.989982	1	52.7232
2.22042	-0.00039268	0.989476	1	54.9535
2.31294	-0.000414639	0.988963	1	57.1786
2.40546	-0.000437099	0.988444	1	59.3985
2.49798	-0.000460062	0.987918	1	61.6132
2.5905	-0.000483553	0.987385	1	63.8228
2.68301	-0.00050752	0.986845	1	66.0272
2.77553	-0.000532041	0.986299	1	68.2264
2.86805	-0.000557118	0.985745	1	70.4204
2.96057	-0.000582722	0.985185	1	72.6093
3.05308	-0.000608856	0.984618	1	74.793
3.1456	-0.00063557	0.984043	1	76.9716
3.23812	-0.000662839	0.983462	1	79.145
3.33064	-0.000690663	0.982874	1	81.3132
3.42315	-0.000719069	0.982278	1	83.4762
3.51567	-0.000748056	0.981676	1	85.6341
3.60819	-0.000777624	0.981066	1	87.7868
3.70071	-0.000807801	0.98045	1	89.9344
3.79323	-0.000838585	0.979826	1	92.0768
3.88574	-0.000869924	0.979195	1	94.214
3.97826	-0.000901924	0.978557	1	96.3461
4.07078	-0.000934532	0.977912	1	98.473
4.1633	-0.000967748	0.97726	1	100.595
4.25581	-0.0010016	0.9766	1	102.711
4.34833	-0.00103611	0.975933	1	104.823
4.44085	-0.00107123	0.97526	1	106.929
4.53337	-0.00110701	0.974578	1	109.03
4.62588	-0.00114348	0.97389	1	111.126
4.7184	-0.00118055	0.973194	1	113.217
4.81092	-0.00121832	0.972492	1	115.302
4.90344	-0.00125677	0.971781	1	117.383
4.99596	-0.00129586	0.971064	1	119.458
5.08847	-0.00133566	0.970339	1	121.528
5.18099	-0.00137612	0.969608	1	123.593
5.27351	-0.00141729	0.968868	1	125.653
5.36603	-0.00145916	0.968122	1	127.708
5.45854	-0.00150173	0.967368	1	129.757
5.55106	-0.001545	0.966607	1	131.802
5.64358	-0.00158901	0.965839	1	133.841
5.7361	-0.00163373	0.965064	1	135.875
5.82861	-0.00167914	0.964281	1	137.904
5.92113	-0.00172529	0.963491	1	139.928
6.01365	-0.00177218	0.962694	1	141.946
6.10617	-0.00181981	0.961889	1	143.96
6.19869	-0.00186815	0.961077	1	145.968
6.2912	-0.00191724	0.960258	1	147.971
6.38372	-0.0019671	0.959432	1	149.969
6.47624	-0.00201772	0.958599	1	151.962
6.56876	-0.00206908	0.957758	1	153.95
6.66127	-0.00212121	0.95691	1	155.933
6.75379	-0.00217409	0.956055	1	157.91
6.84631	-0.00222776	0.955193	1	159.883
6.93883	-0.00228219	0.954324	1	161.85
7.03135	-0.00233739	0.953448	1	163.812
7.12386	-0.00239339	0.952564	1	165.769
7.21638	-0.00245019	0.951674	1	167.721
7.3089	-0.00250775	0.950776	1	169.668
7.40142	-0.0025661	0.949871	1	171.61
7.49393	-0.00262528	0.948959	1	173.546
7.58645	-0.00268522	0.948041	1	175.478
7.67897	-0.00274599	0.947115	1	177.404
7.77149	-0.00280755	0.946182	1	179.325
7.864	-0.00286994	0.945242	1	181.241
7.95652	-0.00293314	0.944296	1	183.152
8.04904	-0.00299246	0.943441	1	185.058
8.14156	-0.00304834	0.942656	1	186.959
8.23408	-0.00310462	0.94187	1	188.855
8.32659	-0.00316138	0.941081	1	190.746
8.41911	-0.00321859	0.94029	1	192.631
8.51163	-0.00327625	0.939496	1	194.512
8.60415	-0.00333434	0.938699	1	196.387
8.69666	-0.00339288	0.937901	1	198.257
8.78918	-0.00345181	0.937099	1	200.123
8.8817	-0.0035112	0.936296	1	201.983
8.97422	-0.00357101	0.93549	1	203.838
9.06673	-0.00363122	0.934682	1	205.688
9.15925	-0.00369182	0.933872	1	207.533
9.25177	-0.00375286	0.933059	1	209.373
9.34429	-0.00381429	0.932245	1	211.208
9.43681	-0.00387609	0.931429	1	213.038
9.52932	-0.00393832	0.93061	1	214.863
9.62184	-0.00400089	0.92979	1	216.683
9.71436	-0.00406384	0.928968	1	218.498
9.80688	-0.00412718	0.928144	1	220.308
9.89939	-0.00419087	0.927319	1	222.112
9.99191	-0.00425494	0.926492	1	223.912
10.0844	-0.00431937	0.925663	1	225.707
10.1769	-0.0043841	0.924832	1	227.497
10.2695	-0.00444923	0.924	1	229.282
10.362	-0.00451465	0.923167	1	231.062
10.4545	-0.00458044	0.922332	1	232.837
10.547	-0.00464652	0.921496	1	234.607
10.6395	-0.00471295	0.920658	1	236.372
10.7321	-0.0047797	0.919819	1	238.132
10.8246	-0.00484675	0.918979	1	239.887
10.9171	-0.00491411	0.918137	1	241.638
11.0096	-0.00498177	0.917295	1	243.383
11.1021	-0.00504974	0.916451	1	245.124
11.1946	-0.00511796	0.915606	1	246.86
11.2872	-0.00518652	0.91476	1	248.59
11.3797	-0.00525533	0.913913	1	250.317
11.4722	-0.0053244	0.913065	1	252.038
11.5647	-0.00539379	0.912217	1	253.754
11.6572	-0.00546339	0.911367	1	255.466
11.7497	-0.00553329	0.910517	1	257.172
11.8423	-0.00560342	0.909665	1	258.874
11.9348	-0.0056738	0.908813	1	260.572
12.0273	-0.00574445	0.907961	1	262.264
12.1198	-0.00581531	0.907107	1	263.952
12.2123	-0.00588643	0.906254	1	265.635
12.3049	-0.00595777	0.905399	1	267.313
12.3974	-0.00602933	0.904544	1	268.987
12.4899	-0.00610112	0.903688	1	270.656
12.5824	-0.00617313	0.902832	1	272.321
12.6749	-0.00624535	0.901976	1	273.981
12.7674	-0.00631776	0.901119	1	275.636
12.86	-0.00639036	0.900262	1	277.287
12.9525	-0.00646318	0.899405	1	278.933
13.045	-0.00653618	0.898547	1	280.575
13.1375	-0.00660939	0.897689	1	282.212
13.23	-0.00668274	0.896831	1.00001	283.845
13.3225	-0.00675631	0.895973	1.00001	285.473
13.4151	-0.00683003	0.895114	1.00001	287.097
13.5076	-0.00690392	0.894256	1.00001	288.717
13.6001	-0.00697794	0.893398	1.00001	290.332
13.6926	-0.00705215	0.892539	1.00001	291.943
13.7851	-0.00712652	0.891681	1.00001	293.55
13.8777	-0.00720103	0.890823	1.00001	295.153
13.9702	-0.00727567	0.889965	1.00001	296.751
14.0627	-0.00735045	0.889107	1.00001	298.346
14.1552	-0.00742536	0.888249	1.00001	299.936
14.2477	-0.0075004	0.887392	1.00001	301.522
14.3402	-0.00757553	0.886535	1.00001	303.104
14.4328	-0.00765082	0.885678	1.00001	304.683
14.5253	-0.00772619	0.884822	1.00001	306.257
14.6178	-0.00780167	0.883966	1.00001	307.827
14.7103	-0.00787726	0.883111	1.00001	309.394
14.8028	-0.00795293	0.882256	1.00001	310.957
14.8953	-0.00802869	0.881402	1.00001	312.517
14.9879	-0.00810452	0.880548	1.00001	314.072
15.0804	-0.00818047	0.879695	1.00001	315.625
15.1729	-0.00825644	0.878843	1.00001	317.173
15.2654	-0.0083325	0.877992	1.00001	318.719
15.3579	-0.00840861	0.877141	1.00001	320.261
15.4505	-0.00848475	0.876292	1.00001	321.799
15.543	-0.00856097	0.875443	1.00001	323.335
15.6355	-0.00863719	0.874596	1.00001	324.867
15.728	-0.00871345	0.873749	1.00001	326.396
15.8205	-0.00878973	0.872904	1.00001	327.923
15.913	-0.00886604	0.87206	1.00001	329.446
16.0056	-0.00894236	0.871217	1.00001	330.967
16.0981	-0.00901868	0.870375	1.00001	332.485
16.1906	-0.009095	0.869535	1.00001	334.001
16.2831	-0.00917129	0.868696	1.00001	335.514
16.3756	-0.00924759	0.867858	1.00001	337.024
16.4682	-0.00932389	0.867022	1.00001	338.532
16.5607	-0.00940017	0.866187	1.00001	340.037
16.6532	-0.00947645	0.865353	1.00001	341.54
16.7457	-0.00955268	0.864521	1.00001	343.04
16.8382	-0.00962892	0.86369	1.00001	344.537
16.9307	-0.00970513	0.862861	1.00001	346.032
17.0233	-0.00978131	0.862033	1.00001	347.524
17.1158	-0.00985747	0.861206	1.00001	349.014
17.2083	-0.00993358	0.860381	1.00001	350.501
17.3008	-0.0100097	0.859557	1.00001	351.986
17.3933	-0.0100858	0.858735	1.00001	353.467
17.4858	-0.0101618	0.857913	1.00001	354.947
17.5784	-0.0102379	0.857093	1.00001	356.424
17.6709	-0.0103141	0.856271	1.00001	357.898
17.7634	-0.0103905	0.855449	1.00001	359.369
17.8559	-0.0104671	0.854626	1.00001	360.839
17.9484	-0.0105438	0.853803	1.00001	362.305
18.041	-0.0106207	0.852978	1.00001	363.769
18.1335	-0.0106977	0.852154	1.00001	365.231
18.226	-0.0107749	0.851328	1.00001	366.689
18.3185	-0.0108522	0.850502	1.00001	368.146
18.411	-0.0109297	0.849675	1.00001	369.6
18.5035	-0.0110073	0.848847	1.00001	371.051
18.5961	-0.0110851	0.848019	1.00001	372.499
18.6886	-0.011163	0.84719	1.00001	373.946
18.7811	-0.0112411	0.84636	1.00001	375.389
18.8736	-0.0113193	0.84553	1.00002	376.83
18.9661	-0.0113976	0.8447	1.00002	378.269
19.0586	-0.0114761	0.843868	1.00002	379.705
19.1512	-0.0115547	0.843036	1.00002	381.138
19.2437	-0.0116335	0.842203	1.00002	382.569
19.3362	-0.0117125	0.84137	1.00002	383.998
19.4287	-0.0117915	0.840536	1.00002	385.424
19.5212	-0.0118708	0.839702	1.00002	386.847
19.6138	-0.0119501	0.838867	1.00002	388.268
19.7063	-0.0120296	0.838031	1.00002	389.687
19.7988	-0.0121093	0.837195	1.00002	391.103
19.8913	-0.012189	0.836359	1.00002	392.516
19.9838	-0.012269	0.835521	1.00002	393.927
20.0763	-0.012349	0.834683	1.00002	395.335
20.1689	-0.0124292	0.833845	1.00002	396.741
20.2614	-0.0125095	0.833006	1.00002	398.145
20.3539	-0.01259	0.832166	1.00002	399.545
20.4464	-0.0126706	0.831326	1.00002	400.944
20.5389	-0.0127514	0.830486	1.00002	402.34
20.6314	-0.0128322	0.829645	1.00002	403.733
20.724	-0.0129133	0.828803	1.00002	405.124
20.8165	-0.0129944	0.827961	1.00002	406.513
20.909	-0.0130757	0.827118	1.00002	407.899
21.0015	-0.0131571	0.826275	1.00002	409.282
21.094	-0.0132387	0.825431	1.00002	410.663
21.1866	-0.0133204	0.824587	1.00002	412.042
21.2791	-0.0134022	0.823742	1.00002	413.418
21.3716	-0.0134841	0.822897	1.00002	414.792
21.4641	-0.0135662	0.822051	1.00002	416.163
21.5566	-0.0136485	0.821205	1.00002	417.532
21.6491	-0.0137308	0.820358	1.00002	418.898
21.7417	-0.0138133	0.819511	1.00002	420.262
21.8342	-0.0138959	0.818663	1.00002	421.623
21.9267	-0.0139787	0.817815	1.00002	422.982
22.0192	-0.0140615	0.816966	1.00002	424.338
22.1117	-0.0141445	0.816117	1.00002	425.692
22.2042	-0.0142277	0.815268	1.00002	427.044
22.2968	-0.014311	0.814417	1.00002	428.393
22.3893	-0.0143944	0.813567	1.00002	429.74
22.4818	-0.0144779	0.812716	1.00002	431.084
22.5743	-0.0145616	0.811864	1.00002	432.426
22.6668	-0.0146454	0.811013	1.00003	433.765
22.7594	-0.0147293	0.81016	1.00003	435.102
22.8519	-0.0148133	0.809307	1.00003	436.437
22.9444	-0.0148975	0.808454	1.00003	437.769
23.0369	-0.0149818	0.8076	1.00003	439.099
23.1294	-0.0150663	0.806746	1.00003	440.426
23.2219	-0.0151508	0.805892	1.00003	441.751
23.3145	-0.0152355	0.805037	1.00003	443.073
23.407	-0.0153203	0.804181	1.00003	444.393
23.4995	-0.0154053	0.803325	1.00003	445.711
23.592	-0.0154904	0.802469	1.00003	447.026
23.6845	-0.0155756	0.801612	1.00003	448.339
23.777	-0.015661	0.800755	1.00003	449.649
23.8696	-0.0157465	0.799898	1.00003	450.957
23.9621	-0.015832	0.79904	1.00003	452.263
24.0546	-0.0159178	0.798181	1.00003	453.566
24.1471	-0.0160036	0.797323	1.00003	454.867
24.2396	-0.0160896	0.796463	1.00003	456.166
24.3322	-0.0161757	0.795604	1.00003	457.462
24.4247	-0.016262	0.794744	1.00003	458.755
24.5172	-0.0163483	0.793884	1.00003	460.047
24.6097	-0.0164348	0.793023	1.00003	461.336
24.7022	-0.0165215	0.792162	1.00003	462.622
24.7947	-0.0166082	0.7913	1.00003	463.906
24.8873	-0.0166951	0.790438	1.00003	465.188
24.9798	-0.0167821	0.789576	1.00003	466.468
25.0723	-0.0168692	0.788713	1.00003	467.745
25.1648	-0.0169565	0.78785	1.00003	469.019
25.2573	-0.0170439	0.786986	1.00003	470.292
25.3498	-0.0171314	0.786123	1.00003	471.562
25.4424	-0.0172191	0.785258	1.00003	472.829
25.5349	-0.0173068	0.784394	1.00003	474.095
25.6274	-0.0173947	0.783529	1.00003	475.358
25.7199	-0.0174828	0.782663	1.00003	476.618
25.8124	-0.0175709	0.781798	1.00004	477.876
25.905	-0.0176592	0.780932	1.00004	479.132
25.9975	-0.0177476	0.780065	1.00004	480.386
26.09	-0.0178362	0.779198	1.00004	481.637
26.1825	-0.0179249	0.778331	1.00004	482.886
26.275	-0.0180137	0.777464	1.00004	484.133
26.3675	-0.0181026	0.776596	1.00004	485.377
26.4601	-0.0181917	0.775728	1.00004	486.619
26.5526	-0.0182808	0.774859	1.00004	487.858
26.6451	-0.0183702	0.77399	1.00004	489.096
26.7376	-0.0184596	0.773121	1.00004	490.331
26.8301	-0.0185492	0.772251	1.00004	491.563
26.9227	-0.0186389	0.771381	1.00004	492.793
27.0152	-0.0187288	0.770511	1.00004	494.021
27.1077	-0.0188187	0.769641	1.00004	495.247
27.2002	-0.0189088	0.76877	1.00004	496.47
27.2927	-0.018999	0.767898	1.00004	497.692
27.3852	-0.0190894	0.767027	1.00004	498.91
27.4778	-0.0191799	0.766155	1.00004	500.127
27.5703	-0.0192705	0.765283	1.00004	501.341
27.6628	-0.0193612	0.76441	1.00004	502.553
27.7553	-0.0194521	0.763537	1.00004	503.762
27.8478	-0.0195431	0.762664	1.00004	504.97
27.9403	-0.0196343	0.76179	1.00004	506.175
28.0329	-0.0197255	0.760916	1.00004	507.377
28.1254	-0.0198169	0.760042	1.00004	508.578
28.2179	-0.0199085	0.759168	1.00004	509.776
28.3104	-0.0200001	0.758293	1.00004	510.972
28.4029	-0.020092	0.757418	1.00004	512.165
28.4955	-0.0201839	0.756543	1.00004	513.357
28.588	-0.0202759	0.755667	1.00004	514.546
28.6805	-0.0203681	0.754791	1.00004	515.733
28.773	-0.0204605	0.753915	1.00004	516.917
28.8655	-0.0205529	0.753038	1.00005	518.099
28.958	-0.0206455	0.752161	1.00005	519.279
29.0506	-0.0207382	0.751284	1.00005	520.457
29.1431	-0.0208311	0.750407	1.00005	521.633
29.2356	-0.0209241	0.749529	1.00005	522.806
29.3281	-0.0210172	0.748651	1.00005	523.977
29.4206	-0.0211105	0.747772	1.00005	525.146
29.5131	-0.0212038	0.746894	1.00005	526.312
29.6057	-0.0212974	0.746015	1.00005	527.476
29.6982	-0.021391	0.745136	1.00005	528.638
29.7907	-0.0214848	0.744256	1.00005	529.798
29.8832	-0.0215788	0.743377	1.00005	530.956
29.9757	-0.0216728	0.742497	1.00005	532.111
30.0683	-0.021767	0.741616	1.00005	533.264
30.1608	-0.0218614	0.740736	1.00005	534.415
30.2533	-0.0219558	0.739855	1.00005	535.563
30.3458	-0.0220504	0.738974	1.00005	536.71
30.4383	-0.0221452	0.738093	1.00005	537.854
30.5308	-0.0222401	0.737211	1.00005	538.996
30.6234	-0.0223351	0.736329	1.00005	540.136
30.7159	-0.0224303	0.735447	1.00005	541.273
30.8084	-0.0225256	0.734565	1.00005	542.409
30.9009	-0.022621	0.733683	1.00005	543.542
30.9934	-0.0227166	0.7328	1.00005	544.673
31.0859	-0.0228123	0.731917	1.00005	545.801
31.1785	-0.0229081	0.731033	1.00005	546.928
31.271	-0.0230041	0.73015	1.00005	548.052
31.3635	-0.0231002	0.729266	1.00005	549.174
31.456	-0.0231965	0.728382	1.00005	550.294
31.5485	-0.0232929	0.727498	1.00005	551.412
31.6411	-0.0233895	0.726613	1.00005	552.527
31.7336	-0.0234861	0.725729	1.00005	553.641
31.8261	-0.023583	0.724844	1.00006	554.752
31.9186	-0.0236799	0.723959	1.00006	555.861
32.0111	-0.0237771	0.723073	1.00006	556.968
32.1036	-0.0238743	0.722188	1.00006	558.072
32.1962	-0.0239717	0.721302	1.00006	559.175
32.2887	-0.0240692	0.720416	1.00006	560.275
32.3812	-0.0241669	0.71953	1.00006	561.373
32.4737	-0.0242647	0.718644	1.00006	562.469
32.5662	-0.0243627	0.717757	1.00006	563.563
32.6587	-0.0244608	0.71687	1.00006	564.655
32.7513	-0.024559	0.715983	1.00006	565.744
32.8438	-0.0246574	0.715096	1.00006	566.832
32.9363	-0.0247559	0.714209	1.00006	567.917
33.0288	-0.0248546	0.713321	1.00006	569
33.1213	-0.0249534	0.712433	1.00006	570.081
33.2139	-0.0250524	0.711545	1.00006	571.16
33.3064	-0.0251515	0.710657	1.00006	572.236
33.3989	-0.0252508	0.709769	1.00006	573.311
33.4914	-0.0253502	0.708881	1.00006	574.383
33.5839	-0.0254497	0.707992	1.00006	575.453
33.6764	-0.0255495	0.707103	1.00006	576.521
33.769	-0.0256493	0.706214	1.00006	577.587
33.8615	-0.0257493	0.705325	1.00006	578.651
33.954	-0.0258494	0.704436	1.00006	579.713
34.0465	-0.0259497	0.703546	1.00006	580.772
34.139	-0.0260501	0.702657	1.00006	581.83
34.2315	-0.0261507	0.701767	1.00006	582.885
34.3241	-0.0262515	0.700877	1.00006	583.938
34.4166	-0.0263523	0.699987	1.00006	584.989
34.5091	-0.0264534	0.699097	1.00006	586.038
34.6016	-0.0265546	0.698206	1.00006	587.085
34.6941	-0.0266559	0.697316	1.00006	588.13
34.7867	-0.0267574	0.696425	1.00007	589.173
34.8792	-0.0268591	0.695535	1.00007	590.213
34.9717	-0.0269608	0.694644	1.00007	591.252
35.0642	-0.0270628	0.693753	1.00007	592.288
35.1567	-0.0271649	0.692862	1.00007	593.322
35.2492	-0.0272671	0.69197	1.00007	594.355
35.3418	-0.0273695	0.691079	1.00007	595.385
35.4343	-0.0274721	0.690188	1.00007	596.413
35.5268	-0.0275748	0.689296	1.00007	597.439
35.6193	-0.0276776	0.688404	1.00007	598.463
35.7118	-0.0277807	0.687513	1.00007	599.484
35.8043	-0.0278839	0.686621	1.00007	600.504
35.8969	-0.0279872	0.685729	1.00007	601.522
35.9894	-0.0280907	0.684837	1.00007	602.537
36.0819	-0.0281943	0.683945	1.00007	603.551
36.1744	-0.0282981	0.683053	1.00007	604.562
36.2669	-0.0284021	0.68216	1.00007	605.572
36.3595	-0.0285062	0.681268	1.00007	606.579
36.452	-0.0286105	0.680376	1.00007	607.584
36.5445	-0.0287149	0.679483	1.00007	608.588
36.637	-0.0288195	0.678591	1.00007	609.589
36.7295	-0.0289242	0.677698	1.00007	610.588
36.822	-0.0290291	0.676806	1.00007	611.585
36.9146	-0.0291342	0.675913	1.00007	612.58
37.0071	-0.0292394	0.67502	1.00007	613.573
37.0996	-0.0293448	0.674127	1.00007	614.564
37.1921	-0.0294504	0.673235	1.00007	615.553
37.2846	-0.0295561	0.672342	1.00007	616.54
37.3772	-0.0296619	0.671449	1.00007	617.525
37.4697	-0.029768	0.670556	1.00007	618.508
37.5622	-0.0298742	0.669663	1.00007	619.488
37.6547	-0.0299806	0.66877	1.00007	620.467
37.7472	-0.0300871	0.667877	1.00007	621.444
37.8397	-0.0301938	0.666984	1.00008	622.419
37.9323	-0.0303006	0.666092	1.00008	623.391
38.0248	-0.0304076	0.665199	1.00008	624.362
38.1173	-0.0305149	0.664306	1.00008	625.331
38.2098	-0.0306222	0.663413	1.00008	626.298
38.3023	-0.0307297	0.66252	1.00008	627.262
38.3948	-0.0308374	0.661627	1.00008	628.225
38.4874	-0.0309452	0.660734	1.00008	629.186
38.5799	-0.0310533	0.659841	1.00008	630.144
38.6724	-0.0311615	0.658949	1.00008	631.101
38.7649	-0.0312698	0.658056	1.00008	632.056
38.8574	-0.0313784	0.657163	1.00008	633.009
38.95	-0.0314871	0.65627	1.00008	633.959
39.0425	-0.0315959	0.655378	1.00008	634.908
39.135	-0.0317049	0.654485	1.00008	635.855
39.2275	-0.0318142	0.653593	1.00008	636.8
39.32	-0.0319236	0.6527	1.00008	637.742
39.4125	-0.0320331	0.651808	1.00008	638.683
39.5051	-0.0321429	0.650916	1.00008	639.622
39.5976	-0.0322528	0.650024	1.00008	640.559
39.6901	-0.0323628	0.649132	1.00008	641.494
39.7826	-0.0324731	0.64824	1.00008	642.427
39.8751	-0.0325835	0.647348	1.00008	643.358
39.9676	-0.0326941	0.646456	1.00008	644.287
40.0602	-0.0328049	0.645564	1.00008	645.214
40.1527	-0.0329158	0.644673	1.00008	646.139
40.2452	-0.0330269	0.643781	1.00008	647.062
40.3377	-0.0331383	0.64289	1.00008	647.983
40.4302	-0.0332497	0.641999	1.00008	648.903
40.5228	-0.0333614	0.641108	1.00008	649.82
40.6153	-0.0334733	0.640217	1.00008	650.736
40.7078	-0.0335853	0.639326	1.00008	651.649
40.8003	-0.0336975	0.638436	1.00008	652.56
40.8928	-0.0338099	0.637545	1.00009	653.47
40.9853	-0.0339224	0.636655	1.00009	654.378
41.0779	-0.0340352	0.635765	1.00009	655.283
41.1704	-0.0341481	0.634875	1.00009	656.187
41.2629	-0.0342612	0.633986	1.00009	657.089
41.3554	-0.0343745	0.633096	1.00009	657.989
41.4479	-0.034488	0.632207	1.00009	658.887
41.5404	-0.0346016	0.631318	1.00009	659.783
41.633	-0.0347155	0.630429	1.00009	660.677
41.7255	-0.0348295	0.62954	1.00009	661.57
41.818	-0.0349437	0.628652	1.00009	662.46
41.9105	-0.0350581	0.627763	1.00009	663.349
42.003	-0.0351727	0.626875	1.00009	664.235
42.0956	-0.0352875	0.625988	1.00009	665.12
42.1881	-0.0354025	0.6251	1.00009	666.003
42.2806	-0.0355176	0.624213	1.00009	666.884
42.3731	-0.035633	0.623326	1.00009	667.763
42.4656	-0.0357485	0.622439	1.00009	668.64
42.5581	-0.0358642	0.621553	1.00009	669.515
42.6507	-0.0359802	0.620667	1.00009	670.388
42.7432	-0.0360963	0.619781	1.00009	671.26
42.8357	-0.0362125	0.618895	1.00009	672.129
42.9282	-0.036329	0.61801	1.00009	672.997
43.0207	-0.0364457	0.617125	1.00009	673.863
43.1132	-0.0365626	0.61624	1.00009	674.727
43.2058	-0.0366797	0.615356	1.00009	675.589
43.2983	-0.036797	0.614472	1.00009	676.449
43.3908	-0.0369144	0.613588	1.00009	677.307
43.4833	-0.0370321	0.612705	1.00009	678.164
43.5758	-0.03715	0.611822	1.00009	679.018
43.6684	-0.0372681	0.610939	1.00009	679.871
43.7609	-0.0373863	0.610057	1.00009	680.722
43.8534	-0.0375048	0.609175	1.00009	681.571
43.9459	-0.0376235	0.608293	1.00009	682.418
44.0384	-0.0377423	0.607412	1.00009	683.264
44.1309	-0.0378614	0.606532	1.0001	684.107
44.2235	-0.0379806	0.605651	1.0001	684.949
44.316	-0.0381001	0.604771	1.0001	685.789
44.4085	-0.0382198	0.603892	1.0001	686.627
44.501	-0.0383397	0.603013	1.0001	687.463
44.5935	-0.0384598	0.602134	1.0001	688.297
44.686	-0.0385801	0.601256	1.0001	689.13
44.7786	-0.0387006	0.600378	1.0001	689.961
44.8711	-0.0388213	0.599501	1.0001	690.789
44.9636	-0.0389422	0.598624	1.0001	691.616
45.0561	-0.0390633	0.597747	1.0001	692.442
45.1486	-0.0391847	0.596872	1.0001	693.265
45.2412	-0.0393062	0.595996	1.0001	694.087
45.3337	-0.039428	0.595121	1.0001	694.907
45.4262	-0.0395499	0.594247	1.0001	695.724
45.5187	-0.0396721	0.593373	1.0001	696.541
45.6112	-0.0397945	0.592499	1.0001	697.355
45.7037	-0.0399171	0.591626	1.0001	698.168
45.7963	-0.04004	0.590754	1.0001	698.978
45.8888	-0.040163	0.589882	1.0001	699.787
45.9813	-0.0402862	0.589011	1.0001	700.595
46.0738	-0.0404098	0.58814	1.0001	701.4
46.1663	-0.0405335	0.58727	1.0001	702.204
46.2588	-0.0406574	0.5864	1.0001	703.005
46.3514	-0.0407815	0.585531	1.0001	703.806
46.4439	-0.0409058	0.584663	1.0001	704.604
46.5364	-0.0410304	0.583795	1.0001	705.4
46.6289	-0.0411553	0.582928	1.0001	706.195
46.7214	-0.0412803	0.582061	1.0001	706.988
46.814	-0.0414055	0.581195	1.0001	707.779
46.9065	-0.041531	0.580329	1.0001	708.569
46.999	-0.0416567	0.579465	1.0001	709.356
47.0915	-0.0417826	0.5786	1.0001	710.142
47.184	-0.0419088	0.577737	1.0001	710.926
47.2765	-0.0420352	0.576874	1.0001	711.709
47.3691	-0.0421618	0.576012	1.00011	712.489
47.4616	-0.0422887	0.57515	1.00011	713.268
47.5541	-0.0424158	0.574289	1.00011	714.045
47.6466	-0.0425431	0.573429	1.00011	714.821
47.7391	-0.0426707	0.57257	1.00011	715.594
47.8316	-0.0427984	0.571711	1.00011	716.366
47.9242	-0.0429265	0.570853	1.00011	717.137
48.0167	-0.0430547	0.569995	1.00011	717.905
48.1092	-0.0431832	0.569139	1.00011	718.672
48.2017	-0.043312	0.568283	1.00011	719.437
48.2942	-0.043441	0.567428	1.00011	720.2
48.3868	-0.0435702	0.566573	1.00011	720.961
48.4793	-0.0436997	0.56572	1.00011	721.721
48.5718	-0.0438294	0.564867	1.00011	722.479
48.6643	-0.0439594	0.564015	1.00011	723.236
48.7568	-0.0440896	0.563163	1.00011	723.99
48.8493	-0.0442201	0.562313	1.00011	724.743
48.9419	-0.0443508	0.561463	1.00011	725.495
49.0344	-0.0444817	0.560614	1.00011	726.244
49.1269	-0.044613	0.559765	1.00011	726.992
49.2194	-0.0447444	0.558918	1.00011	727.738
49.3119	-0.0448761	0.558071	1.00011	728.483
49.4045	-0.0450081	0.557226	1.00011	729.225
49.497	-0.0451404	0.556381	1.00011	729.966
49.5895	-0.0452729	0.555536	1.00011	730.706
49.682	-0.0454056	0.554693	1.00011	731.444
49.7745	-0.0455387	0.553851	1.00011	732.18
49.867	-0.0456719	0.553009	1.00011	732.914
49.9596	-0.0458055	0.552168	1.00011	733.647
50.0521	-0.0459393	0.551328	1.00011	734.377
50.1446	-0.0460734	0.550489	1.00011	735.107
50.2371	-0.0462078	0.549651	1.00011	735.834
50.3296	-0.0463424	0.548814	1.00011	736.56
50.4221	-0.0464773	0.547977	1.00011	737.285
50.5147	-0.0466125	0.547142	1.00011	738.007
50.6072	-0.0467479	0.546307	1.00011	738.728
50.6997	-0.0468836	0.545473	1.00011	739.448
50.7922	-0.0470196	0.54464	1.00011	740.165
50.8847	-0.0471559	0.543808	1.00012	740.881
50.9773	-0.0472925	0.542977	1.00012	741.596
51.0698	-0.0474293	0.542146	1.00012	742.308
51.1623	-0.0475665	0.541317	1.00012	743.019
51.2548	-0.047704	0.540489	1.00012	743.729
51.3473	-0.0478416	0.539661	1.00012	744.437
51.4398	-0.0479797	0.538834	1.00012	745.143
51.5324	-0.048118	0.538008	1.00012	745.847
51.6249	-0.0482566	0.537184	1.00012	746.55
51.7174	-0.0483955	0.536359	1.00012	747.252
51.8099	-0.0485348	0.535536	1.00012	747.951
51.9024	-0.0486743	0.534714	1.00012	748.649
51.9949	-0.0488141	0.533893	1.00012	749.346
52.0875	-0.0489543	0.533072	1.00012	750.041
52.18	-0.0490947	0.532253	1.00012	750.734
52.2725	-0.0492355	0.531434	1.00012	751.425
52.365	-0.0493766	0.530616	1.00012	752.115
52.4575	-0.049518	0.529799	1.00012	752.804
52.5501	-0.0496597	0.528983	1.00012	753.49
52.6426	-0.0498018	0.528168	1.00012	754.176
52.7351	-0.0499441	0.527353	1.00012	754.859
52.8276	-0.0500869	0.52654	1.00012	755.541
52.9201	-0.0502299	0.525727	1.00012	756.221
53.0126	-0.0503733	0.524915	1.00012	756.9
53.1052	-0.050517	0.524104	1.00012	757.577
53.1977	-0.0506611	0.523294	1.00012	758.253
53.2902	-0.0508055	0.522484	1.00012	758.927
53.3827	-0.0509503	0.521676	1.00012	759.6
53.4752	-0.0510954	0.520868	1.00012	760.27
53.5677	-0.0512409	0.52006	1.00012	760.94
53.6603	-0.0513868	0.519254	1.00012	761.608
53.7528	-0.051533	0.518448	1.00012	762.274
53.8453	-0.0516796	0.517643	1.00012	762.938
53.9378	-0.0518265	0.516838	1.00012	763.601
54.0303	-0.0519739	0.516035	1.00012	764.263
54.1229	-0.0521216	0.515231	1.00012	764.923
54.2154	-0.0522697	0.514429	1.00012	765.581
54.3079	-0.0524183	0.513627	1.00012	766.238
54.4004	-0.0525672	0.512825	1.00012	766.893
54.4929	-0.0527165	0.512024	1.00013	767.547
54.5854	-0.0528662	0.511223	1.00013	768.199
54.678	-0.0530164	0.510423	1.00013	768.85
54.7705	-0.053167	0.509624	1.00013	769.499
54.863	-0.0533179	0.508824	1.00013	770.147
54.9555	-0.0534694	0.508025	1.00013	770.793
55.048	-0.0536212	0.507226	1.00013	771.437
55.1405	-0.0537735	0.506428	1.00013	772.08
55.2331	-0.0539263	0.50563	1.00013	772.722
55.3256	-0.0540795	0.504831	1.00013	773.362
55.4181	-0.0542333	0.504033	1.00013	774
55.5106	-0.0543875	0.503235	1.00013	774.637
55.6031	-0.0545421	0.502437	1.00013	775.273
55.6957	-0.0546973	0.501639	1.00013	775.907
55.7882	-0.0548529	0.50084	1.00013	776.539
55.8807	-0.0550091	0.500041	1.00013	777.17
55.9732	-0.0551658	0.499242	1.00013	777.799
56.0657	-0.0553231	0.498443	1.00013	778.427
56.1582	-0.0554808	0.497643	1.00013	779.054
56.2508	-0.0556392	0.496842	1.00013	779.679
56.3433	-0.055798	0.496041	1.00013	780.302
56.4358	-0.0559575	0.495239	1.00013	780.924
56.5283	-0.0561176	0.494436	1.00013	781.545
56.6208	-0.0562782	0.493632	1.00013	782.164
56.7133	-0.0564395	0.492827	1.00013	782.781
56.8059	-0.0566015	0.492021	1.00013	783.397
56.8984	-0.056764	0.491214	1.00013	784.012
56.9909	-0.0569273	0.490404	1.00013	784.625
57.0834	-0.0570912	0.489593	1.00013	785.236
57.1759	-0.0572558	0.488781	1.00013	785.847
57.2685	-0.0574211	0.487966	1.00013	786.455
57.361	-0.0575872	0.487149	1.00013	787.063
57.4535	-0.0577541	0.48633	1.00013	787.668
57.546	-0.0579217	0.485508	1.00013	788.273
57.6385	-0.0580901	0.484683	1.00013	788.876
57.731	-0.0582594	0.483855	1.00013	789.477
57.8236	-0.0584296	0.483024	1.00013	790.077
57.9161	-0.0586006	0.48219	1.00013	790.676
58.0086	-0.0587725	0.481351	1.00013	791.273
58.1011	-0.0589455	0.480508	1.00013	791.868
58.1936	-0.0591193	0.479661	1.00013	792.463
58.2861	-0.0592943	0.478809	1.00013	793.056
58.3787	-0.0594703	0.477952	1.00013	793.647
58.4712	-0.0596474	0.47709	1.00014	794.237
58.5637	-0.0598256	0.476221	1.00014	794.826
58.6562	-0.0600051	0.475346	1.00014	795.413
58.7487	-0.0601858	0.474463	1.00014	795.998
58.8413	-0.0603679	0.473574	1.00014	796.583
58.9338	-0.0605513	0.472676	1.00014	797.166
59.0263	-0.0607362	0.471769	1.00014	797.747
59.1188	-0.0609226	0.470853	1.00014	798.327
59.2113	-0.0611106	0.469927	1.00014	798.906
59.3038	-0.0613003	0.46899	1.00014	799.483
59.3964	-0.0614918	0.468041	1.00014	800.059
59.4889	-0.0616852	0.46708	1.00014	800.634
59.5814	-0.0618806	0.466104	1.00014	801.207
59.6739	-0.0620782	0.465113	1.00014	801.779
59.7664	-0.062278	0.464106	1.00014	802.349
59.859	-0.0624803	0.463082	1.00014	802.918
59.9515	-0.0626851	0.462038	1.00014	803.485
60.044	-0.0628928	0.460973	1.00014	804.052
60.1365	-0.0631036	0.459884	1.00014	804.617
60.229	-0.0633176	0.458771	1.00014	805.18
60.3215	-0.0635351	0.457629	1.00014	805.742
60.4141	-0.0637566	0.456457	1.00014	806.303
60.5066	-0.0639823	0.455251	1.00014	806.862
60.5991	-0.0642127	0.454008	1.00014	807.42
60.6916	-0.0644483	0.452722	1.00014	807.977
60.7841	-0.0646897	0.45139	1.00014	808.532
60.8766	-0.0649375	0.450005	1.00014	809.086
60.9692	-0.0651927	0.44856	1.00014	809.639
61.0617	-0.0654561	0.447046	1.00014	810.19
61.1542	-0.0657292	0.445455	1.00014	810.74
61.2467	-0.0660132	0.443773	1.00014	811.289
61.3392	-0.0663102	0.441985	1.00014	811.836
61.4318	-0.0666226	0.440071	1.00014	812.382
61.5243	-0.0669536	0.438006	1.00014	812.927
61.6168	-0.0673078	0.435757	1.00014	813.47
61.7093	-0.0676909	0.433276	1.00014	814.012
61.8018	-0.0681121	0.430499	1.00014	814.552
61.8943	-0.0685848	0.427326	1.00014	815.092
61.9869	-0.0691313	0.423601	1.00014	815.63
62.0794	-0.0697469	0.419346	1.00014	816.167
62.1719	-0.0703979	0.41481	1.00014	816.702
62.2644	-0.071083	0.409997	1.00014	817.236
62.3569	-0.071803	0.404901	1.00014	817.769
62.4494	-0.0725584	0.399516	1.00014	818.3
62.542	-0.0733494	0.393838	1.00014	818.83
62.6345	-0.0741761	0.387865	1.00014	819.359
62.727	-0.0750385	0.381595	1.00014	819.887
62.8195	-0.0759362	0.375031	1.00014	820.413
62.912	-0.0768688	0.368174	1.00014	820.938
63.0046	-0.0778353	0.361031	1.00014	821.462
63.0971	-0.0788347	0.353609	1.00014	821.984
63.1896	-0.0798656	0.345917	1.00014	822.505
63.2821	-0.0809263	0.337968	1.00014	823.025
63.3746	-0.0820148	0.329776	1.00014	823.544
63.4671	-0.0831288	0.321358	1.00014	824.061
63.5597	-0.0842656	0.312733	1.00014	824.577
63.6522	-0.0854225	0.303923	1.00014	825.092
63.7447	-0.0865959	0.29495	1.00014	825.606
63.8372	-0.0877826	0.285841	1.00014	826.118
63.9297	-0.0889787	0.276622	1.00014	826.629
64.0222	-0.0901803	0.267321	1.00014	827.139
64.1148	-0.0913832	0.257967	1.00014	827.647
64.2073	-0.0925832	0.24859	1.00014	828.154
64.2998	-0.0937758	0.239219	1.00014	828.66
64.3923	-0.0949568	0.229884	1.00014	829.165
64.4848	-0.0961218	0.220615	1.00014	829.669
64.5774	-0.0972665	0.21144	1.00014	830.171
64.6699	-0.0983869	0.202385	1.00014	830.672
64.7624	-0.0994793	0.193476	1.00014	831.172
64.8549	-0.10054	0.184737	1.00014	831.67
64.9474	-0.101566	0.176188	1.00014	832.168
65.0399	-0.102554	0.167848	1.00014	832.664
65.1325	-0.103502	0.159736	1.00014	833.159
65.225	-0.104408	0.151863	1.00014	833.652
65.3175	-0.10527	0.144243	1.00014	834.145
65.41	-0.106088	0.136884	1.00014	834.636
65.5025	-0.106861	0.129794	1.00014	835.126
65.595	-0.107589	0.122976	1.00014	835.615
65.6876	-0.108271	0.116434	1.00014	836.102
65.7801	-0.108909	0.110168	1.00014	836.589
65.8726	-0.109503	0.104176	1.00014	837.074
65.9651	-0.110056	0.0984564	1.00014	837.558
66.0576	-0.110567	0.0930048	1.00014	838.041
66.1502	-0.11104	0.0878157	1.00014	838.522
66.2427	-0.111475	0.082883	1.00014	839.003
66.3352	-0.111875	0.0781996	1.00014	839.482
66.4277	-0.112242	0.0737577	1.00014	839.96
66.5202	-0.112578	0.069549	1.00014	840.436
66.6127	-0.112884	0.0655649	1.00014	840.912
66.7053	-0.113163	0.0617967	1.00014	841.386
66.7978	-0.113418	0.0582352	1.00014	841.86
66.8903	-0.113648	0.0548714	1.00014	842.332
66.9828	-0.113858	0.0516962	1.00014	842.803
67.0753	-0.114048	0.0487008	1.00014	843.272
67.1678	-0.114219	0.0458763	1.00014	843.741
67.2604	-0.114374	0.0432142	1.00014	844.208
67.3529	-0.114514	0.0407059	1.00014	844.674
67.4454	-0.114641	0.0383436	1.00014	845.139
67.5379	-0.114755	0.0361192	1.00014	845.603
67.6304	-0.114857	0.0340253	1.00014	846.066
67.723	-0.11495	0.0320546	1.00014	846.527
67.8155	-0.115033	0.0302003	1.00014	846.987
67.908	-0.115107	0.0284557	1.00014	847.446
68.0005	-0.115174	0.0268144	1.00014	847.904
68.093	-0.115234	0.0252707	1.00014	848.361
68.1855	-0.115288	0.0238186	1.00014	848.817
68.2781	-0.115337	0.022453	1.00014	849.271
68.3706	-0.11538	0.0211685	1.00014	849.725
68.4631	-0.115419	0.0199605	1.00014	850.177
68.5556	-0.115454	0.0188244	1.00014	850.628
68.6481	-0.115485	0.0177559	1.00014	851.077
68.7406	-0.115513	0.0167509	1.00014	851.526
68.8332	-0.115538	0.0158055	1.00014	851.974
68.9257	-0.115561	0.0149163	1.00014	852.42
69.0182	-0.115581	0.0140798	1.00014	852.865
69.1107	-0.115599	0.0132927	1.00014	853.309
69.2032	-0.115615	0.0125522	1.00014	853.752
69.2958	-0.115629	0.0118554	1.00014	854.194
69.3883	-0.115642	0.0111996	1.00014	854.634
69.4808	-0.115653	0.0105823	1.00014	855.074
69.5733	-0.115664	0.0100013	1.00014	855.512
69.6658	-0.115673	0.00945434	1.00014	855.949
69.7583	-0.115681	0.00893931	1.00014	856.385
69.8509	-0.115688	0.00845432	1.00014	856.82
69.9434	-0.115695	0.00799755	1.00014	857.254
70.0359	-0.115701	0.0075673	1.00014	857.686
70.1284	-0.115706	0.00716196	1.00014	858.117
70.2209	-0.11571	0.00678004	1.00014	858.547
70.3135	-0.115715	0.00642013	1.00014	858.976
70.406	-0.115718	0.00608092	1.00014	859.404
70.4985	-0.115722	0.00576115	1.00014	859.831
70.591	-0.115724	0.00545967	1.00014	860.256
70.6835	-0.115727	0.00517538	1.00014	860.681
70.776	-0.115729	0.00490727	1.00014	861.104
70.8686	-0.115731	0.00465437	1.00014	861.526
70.9611	-0.115733	0.00441577	1.00014	861.947
71.0536	-0.115735	0.00419062	1.00014	862.366
71.1461	-0.115736	0.00397814	1.00014	862.785
71.2386	-0.115738	0.00377756	1.00014	863.202
71.3311	-0.115739	0.00358819	1.00014	863.618
71.4237	-0.11574	0.00340937	1.00014	864.033
71.5162	-0.115741	0.00324047	1.00014	864.446
71.6087	-0.115741	0.00308091	1.00014	864.859
71.7012	-0.115742	0.00293014	1.00014	865.27
71.7937	-0.115743	0.00278764	1.00014	865.68
71.8863	-0.115743	0.00265293	1.00014	866.089
71.9788	-0.115744	0.00252555	1.00014	866.496
72.0713	-0.115744	0.00240507	1.00014	866.903
72.1638	-0.115744	0.00229109	1.00014	867.308
72.2563	-0.115745	0.00218322	1.00014	867.712
72.3488	-0.115745	0.00208111	1.00014	868.114
72.4414	-0.115745	0.00198442	1.00014	868.516
72.5339	-0.115745	0.00189283	1.00014	868.916
72.6264	-0.115746	0.00180604	1.00014	869.314
72.7189	-0.115746	0.00172378	1.00014	869.712
72.8114	-0.115746	0.00164578	1.00014	870.108
72.9039	-0.115746	0.00157178	1.00014	870.503
72.9965	-0.115746	0.00150156	1.00014	870.896
73.089	-0.115746	0.0014349	1.00014	871.289
73.1815	-0.115746	0.00137159	1.00014	871.679
73.274	-0.115746	0.00131145	1.00014	872.069
73.3665	-0.115746	0.00125428	1.00014	872.457
73.4591	-0.115746	0.00119993	1.00014	872.844
73.5516	-0.115746	0.00114823	1.00014	873.229
73.6441	-0.115746	0.00109904	1.00014	873.613
73.7366	-0.115746	0.00105221	1.00014	873.995
73.8291	-0.115746	0.00100763	1.00014	874.376
73.9216	-0.115746	0.000965173	1.00014	874.755
74.0142	-0.115746	0.000924724	1.00014	875.133
74.1067	-0.115746	0.000886203	1.00014	875.51
74.1992	-0.115746	0.000849493	1.00014	875.885
74.2917	-0.115746	0.000814533	1.00014	876.258
74.3842	-0.115746	0.000781228	1.00014	876.63
74.4767	-0.115746	0.000749523	1.00014	877
74.5693	-0.115746	0.000719333	1.00014	877.368
74.6618	-0.115746	0.000690625	1.00014	877.734
74.7543	-0.115746	0.000663337	1.00014	878.099
74.8468	-0.115746	0.000637414	1.00014	878.462
74.9393	-0.115746	0.000612819	1.00014	878.824
75.0319	-0.115746	0.000589531	1.00014	879.183
75.1244	-0.115746	0.000567502	1.00014	879.54
75.2169	-0.115746	0.000546697	1.00014	879.896
75.3094	-0.115746	0.000527107	1.00014	880.249
75.4019	-0.115746	0.000508692	1.00014	880.601
75.4944	-0.115746	0.000491432	1.00014	880.95
75.587	-0.115746	0.000475316	1.00014	881.297
75.6795	-0.115746	0.000460298	1.00014	881.642
75.772	-0.115746	0.000446378	1.00014	881.984
75.8645	-0.115746	0.000433518	1.00014	882.324
75.957	-0.115745	0.000421683	1.00014	882.661
76.0495	-0.115745	0.00041087	1.00014	882.996
76.1421	-0.115745	0.000401016	1.00014	883.328
76.2346	-0.115745	0.000392114	1.00014	883.657
76.3271	-0.115745	0.000384113	1.00014	883.983
76.4196	-0.115745	0.00037697	1.00014	884.306
76.5121	-0.115745	0.000370644	1.00014	884.626
76.6047	-0.115745	0.000365074	1.00014	884.943
76.6972	-0.115745	0.000360224	1.00014	885.255
76.7897	-0.115745	0.000356052	1.00014	885.564
76.8822	-0.115745	0.000352475	1.00014	885.869
76.9747	-0.115745	0.000349465	1.00014	886.17
77.0672	-0.115745	0.000346946	1.00014	886.466
77.1598	-0.115745	0.000344881	1.00014	886.757
77.2523	-0.115745	0.000343226	1.00014	887.044
77.3448	-0.115745	0.000341904	1.00014	887.324
77.4373	-0.115745	0.000340896	1.00014	887.599
77.5298	-0.115745	0.00034014	1.00014	887.867
77.6223	-0.115745	0.0003396	1.00014	888.128
77.7149	-0.115745	0.000339233	1.00014	888.382
77.8074	-0.115745	0.000339014	1.00014	888.627
77.8999	-0.115745	0.000338908	1.00014	888.864
77.9924	-0.115745	0.000338876	1.00014	889.09
78.0849	-0.115745	0.000338912	1.00014	889.304
78.1775	-0.115745	0.000338989	1.00014	889.506
78.27	-0.115745	0.000339082	1.00014	889.694
78.3625	-0.115745	0.000339179	1.00014	889.866
78.455	-0.115745	0.000339266	1.00014	890.019
78.5475	-0.115745	0.000339341	1.00014	890.151
78.64	-0.115745	0.0003394	1.00014	890.258
78.7326	-0.115745	0.00033944	1.00014	890.337
