# Supplementary material for: Gas transport in firn: multiple-tracer characterisation and model intercomparison for NEEM, Northern Greenland
Source: Copernicus journal article supplement (doi:10.5194/acp-12-4259-2012), 2012-05-14
Supplement: Supplementary file 16 [file NEEM08_US_SIO.xls]

## Sheet: Diffusivities
DEPTH	MOLEC DIFF	EDDY DIFF
0	1.215e-05	1.6e-05
0.2	1.215e-05	1.5373e-05
0.4	1.215e-05	1.477e-05
0.6	1.215e-05	1.4191e-05
0.8	1.215e-05	1.3634e-05
1	1.215e-05	1.31e-05
1.2	1.215e-05	1.2586e-05
1.4	1.215e-05	1.2093e-05
1.6	1.215e-05	1.1618e-05
1.8	1.215e-05	1.1163e-05
2	1.215e-05	1.0725e-05
2.2	1.215e-05	1.0305e-05
2.4	1.215e-05	9.9005e-06
2.6	1.215e-05	9.5123e-06
2.8	1.215e-05	9.1393e-06
3	1.215e-05	8.781e-06
3.2	1.215e-05	8.4367e-06
3.4	1.215e-05	8.1059e-06
3.6	1.215e-05	7.788e-06
3.8	1.215e-05	7.4827e-06
4	1.215e-05	7.1893e-06
4.2	1.215e-05	6.9074e-06
4.4	1.215e-05	6.6365e-06
4.6	1.215e-05	6.3763e-06
4.8	1.215e-05	6.1263e-06
5	1.215e-05	5.8861e-06
5.2	1.215e-05	5.6553e-06
5.4	1.215e-05	5.4335e-06
5.6	1.215e-05	5.2205e-06
5.8	1.215e-05	5.0158e-06
6	1.215e-05	4.8191e-06
6.2	1.215e-05	4.6301e-06
6.4	1.215e-05	4.4486e-06
6.6	1.215e-05	4.2742e-06
6.8	1.215e-05	4.1066e-06
7	1.214e-05	3.9456e-06
7.2	1.214e-05	3.7908e-06
7.4	1.213e-05	3.6422e-06
7.6	1.212e-05	3.4994e-06
7.8	1.211e-05	3.3622e-06
8	1.21e-05	3.2303e-06
8.2	1.208e-05	3.1037e-06
8.4	1.207e-05	2.982e-06
8.6	1.205e-05	2.8651e-06
8.8	1.203e-05	2.7527e-06
9	1.202e-05	2.6448e-06
9.2	1.2e-05	2.5411e-06
9.4	1.198e-05	2.4414e-06
9.6	1.196e-05	2.3457e-06
9.8	1.194e-05	2.2537e-06
10	1.192e-05	2.1654e-06
10.2	1.19e-05	2.0805e-06
10.4	1.188e-05	1.9989e-06
10.6	1.185e-05	1.9205e-06
10.8	1.183e-05	1.8452e-06
11	1.18e-05	1.7729e-06
11.2	1.177e-05	1.7033e-06
11.4	1.175e-05	1.6365e-06
11.6	1.172e-05	1.5724e-06
11.8	1.169e-05	1.5107e-06
12	1.166e-05	1.4515e-06
12.2	1.162e-05	1.3946e-06
12.4	1.159e-05	1.3399e-06
12.6	1.155e-05	1.2874e-06
12.8	1.152e-05	1.2369e-06
13	1.148e-05	1.1884e-06
13.2	1.144e-05	1.1418e-06
13.4	1.14e-05	1.097e-06
13.6	1.136e-05	1.054e-06
13.8	1.132e-05	1.0127e-06
14	1.128e-05	9.7296e-07
14.2	1.125e-05	9.3481e-07
14.4	1.121e-05	8.9816e-07
14.6	1.117e-05	8.6294e-07
14.8	1.113e-05	8.291e-07
15	1.109e-05	7.9659e-07
15.2	1.104e-05	7.6536e-07
15.4	1.1e-05	7.3535e-07
15.6	1.096e-05	7.0651e-07
15.8	1.092e-05	6.7881e-07
16	1.087e-05	6.522e-07
16.2	1.083e-05	6.2662e-07
16.4	1.078e-05	6.0205e-07
16.6	1.074e-05	5.7845e-07
16.8	1.069e-05	5.5576e-07
17	1.065e-05	5.3397e-07
17.2	1.06e-05	5.1303e-07
17.4	1.055e-05	4.9292e-07
17.6	1.05e-05	4.7359e-07
17.8	1.045e-05	4.5502e-07
18	1.04e-05	4.3718e-07
18.2	1.035e-05	4.2004e-07
18.4	1.03e-05	4.0357e-07
18.6	1.025e-05	3.8774e-07
18.8	1.021e-05	3.7254e-07
19	1.016e-05	3.5793e-07
19.2	1.011e-05	3.439e-07
19.4	1.006e-05	3.3041e-07
19.6	1.001e-05	3.1746e-07
19.8	9.957e-06	3.0501e-07
20	9.906e-06	2.9305e-07
20.2	9.854e-06	2.8156e-07
20.4	9.803e-06	2.7052e-07
20.6	9.752e-06	2.5991e-07
20.8	9.7e-06	2.4972e-07
21	9.649e-06	2.3993e-07
21.2	9.597e-06	2.3052e-07
21.4	9.546e-06	2.2148e-07
21.6	9.495e-06	2.128e-07
21.8	9.443e-06	2.0445e-07
22	9.392e-06	1.9644e-07
22.2	9.341e-06	1.8874e-07
22.4	9.289e-06	1.8133e-07
22.6	9.238e-06	1.7422e-07
22.8	9.187e-06	1.6739e-07
23	9.136e-06	1.6083e-07
23.2	9.086e-06	1.5452e-07
23.4	9.035e-06	1.4846e-07
23.6	8.985e-06	1.4264e-07
23.8	8.934e-06	1.3705e-07
24	8.884e-06	1.3168e-07
24.2	8.834e-06	1.2651e-07
24.4	8.783e-06	1.2155e-07
24.6	8.733e-06	1.1679e-07
24.8	8.683e-06	1.1221e-07
25	8.632e-06	1.0781e-07
25.2	8.582e-06	1.0358e-07
25.4	8.531e-06	9.9519e-08
25.6	8.481e-06	9.5616e-08
25.8	8.43e-06	9.1867e-08
26	8.38e-06	8.8265e-08
26.2	8.329e-06	8.4804e-08
26.4	8.279e-06	8.1479e-08
26.6	8.228e-06	7.8284e-08
26.8	8.177e-06	7.5214e-08
27	8.126e-06	7.2265e-08
27.2	8.075e-06	6.9432e-08
27.4	8.023e-06	6.6709e-08
27.6	7.972e-06	6.4094e-08
27.8	7.92e-06	6.158e-08
28	7.868e-06	5.9166e-08
28.2	7.816e-06	5.6846e-08
28.4	7.764e-06	5.4617e-08
28.6	7.712e-06	5.2475e-08
28.8	7.659e-06	5.0418e-08
29	7.607e-06	4.8441e-08
29.2	7.554e-06	4.6541e-08
29.4	7.501e-06	4.4717e-08
29.6	7.448e-06	4.2963e-08
29.8	7.396e-06	4.1279e-08
30	7.343e-06	3.966e-08
30.2	7.29e-06	3.8105e-08
30.4	7.237e-06	3.6611e-08
30.6	7.184e-06	3.5175e-08
30.8	7.131e-06	3.3796e-08
31	7.078e-06	3.2471e-08
31.2	7.025e-06	3.1198e-08
31.4	6.973e-06	2.9974e-08
31.6	6.92e-06	2.8799e-08
31.8	6.868e-06	2.767e-08
32	6.815e-06	2.6585e-08
32.2	6.762e-06	2.5543e-08
32.4	6.709e-06	2.4541e-08
32.6	6.656e-06	2.3579e-08
32.8	6.604e-06	2.2654e-08
33	6.551e-06	2.1766e-08
33.2	6.499e-06	2.0912e-08
33.4	6.446e-06	2.0092e-08
33.6	6.393e-06	1.9305e-08
33.8	6.341e-06	1.8548e-08
34	6.288e-06	1.782e-08
34.2	6.236e-06	1.7122e-08
34.4	6.184e-06	1.645e-08
34.6	6.132e-06	1.5805e-08
34.8	6.08e-06	1.5186e-08
35	6.028e-06	1.459e-08
35.2	5.977e-06	1.4018e-08
35.4	5.925e-06	1.3468e-08
35.6	5.874e-06	1.294e-08
35.8	5.824e-06	1.2433e-08
36	5.773e-06	1.1945e-08
36.2	5.723e-06	1.1477e-08
36.4	5.673e-06	1.1027e-08
36.6	5.624e-06	1.0595e-08
36.8	5.574e-06	1.0179e-08
37	5.526e-06	9.78e-09
37.2	5.477e-06	9.3966e-09
37.4	5.429e-06	9.0281e-09
37.6	5.381e-06	8.6741e-09
37.8	5.333e-06	8.334e-09
38	5.286e-06	8.0072e-09
38.2	5.239e-06	7.6933e-09
38.4	5.192e-06	7.3916e-09
38.6	5.146e-06	7.1018e-09
38.8	5.1e-06	6.8233e-09
39	5.054e-06	6.5558e-09
39.2	5.009e-06	6.2987e-09
39.4	4.963e-06	6.0517e-09
39.6	4.918e-06	5.8144e-09
39.8	4.874e-06	5.5864e-09
40	4.829e-06	5.3674e-09
40.2	4.785e-06	5.1569e-09
40.4	4.741e-06	4.9547e-09
40.6	4.698e-06	4.7605e-09
40.8	4.654e-06	4.5738e-09
41	4.611e-06	4.3945e-09
41.2	4.568e-06	4.2221e-09
41.4	4.526e-06	4.0566e-09
41.6	4.484e-06	3.8975e-09
41.8	4.442e-06	3.7447e-09
42	4.402e-06	3.5979e-09
42.2	4.361e-06	3.4568e-09
42.4	4.321e-06	3.3213e-09
42.6	4.28e-06	3.191e-09
42.8	4.24e-06	3.0659e-09
43	4.199e-06	2.9457e-09
43.2	4.159e-06	2.8302e-09
43.4	4.119e-06	2.7192e-09
43.6	4.079e-06	2.6126e-09
43.8	4.039e-06	2.5102e-09
44	3.998e-06	2.4117e-09
44.2	3.958e-06	2.3172e-09
44.4	3.917e-06	2.2263e-09
44.6	3.877e-06	2.139e-09
44.8	3.837e-06	2.0551e-09
45	3.797e-06	1.9746e-09
45.2	3.757e-06	1.8971e-09
45.4	3.717e-06	1.8227e-09
45.6	3.676e-06	1.7513e-09
45.8	3.636e-06	1.6826e-09
46	3.595e-06	1.6166e-09
46.2	3.555e-06	1.5532e-09
46.4	3.515e-06	1.4923e-09
46.6	3.474e-06	1.4338e-09
46.8	3.433e-06	1.3776e-09
47	3.392e-06	1.3236e-09
47.2	3.35e-06	1.2717e-09
47.4	3.309e-06	1.2218e-09
47.6	3.268e-06	1.1739e-09
47.8	3.227e-06	1.1279e-09
48	3.186e-06	1.0837e-09
48.2	3.145e-06	1.0412e-09
48.4	3.104e-06	1.0003e-09
48.6	3.062e-06	9.6112e-10
48.8	3.02e-06	9.2343e-10
49	2.978e-06	8.8723e-10
49.2	2.936e-06	8.5244e-10
49.4	2.894e-06	8.1901e-10
49.6	2.852e-06	7.869e-10
49.8	2.809e-06	7.5604e-10
50	2.766e-06	7.264e-10
50.2	2.723e-06	6.9792e-10
50.4	2.679e-06	6.7055e-10
50.6	2.635e-06	6.4426e-10
50.8	2.591e-06	6.19e-10
51	2.547e-06	5.9473e-10
51.2	2.5e-06	5.7141e-10
51.4	2.454e-06	5.49e-10
51.6	2.407e-06	5.2747e-10
51.8	2.359e-06	5.0679e-10
52	2.31e-06	4.8692e-10
52.2	2.262e-06	4.6783e-10
52.4	2.213e-06	4.4948e-10
52.6	2.163e-06	4.3186e-10
52.8	2.111e-06	4.1493e-10
53	2.059e-06	3.9866e-10
53.2	2.006e-06	3.8302e-10
53.4	1.953e-06	3.6801e-10
53.6	1.899e-06	3.5358e-10
53.8	1.844e-06	3.3971e-10
54	1.788e-06	3.2639e-10
54.2	1.73e-06	3.1359e-10
54.4	1.672e-06	3.013e-10
54.6	1.613e-06	2.8948e-10
54.8	1.554e-06	2.7813e-10
55	1.497e-06	2.6723e-10
55.2	1.44e-06	2.5675e-10
55.4	1.385e-06	2.4668e-10
55.6	1.332e-06	2.3701e-10
55.8	1.28e-06	2.2772e-10
56	1.231e-06	2.1879e-10
56.2	1.184e-06	2.1021e-10
56.4	1.14e-06	2.0197e-10
56.6	1.099e-06	1.9405e-10
56.8	1.061e-06	1.8644e-10
57	1.025e-06	1.7913e-10
57.2	9.908e-07	1.721e-10
57.4	9.585e-07	1.6536e-10
57.6	9.271e-07	1.5887e-10
57.8	8.963e-07	1.5264e-10
58	8.651e-07	1.4666e-10
58.2	8.326e-07	1.4091e-10
58.4	7.987e-07	1.3538e-10
58.6	7.632e-07	1.3007e-10
58.8	7.262e-07	1.2497e-10
59	6.881e-07	1.2007e-10
59.2	6.492e-07	1.1536e-10
59.4	6.095e-07	1.1084e-10
59.6	5.695e-07	1.065e-10
59.8	5.284e-07	1.0232e-10
60	4.863e-07	9.8307e-11
60.2	4.437e-07	9.4453e-11
60.4	4.01e-07	9.0749e-11
60.6	3.583e-07	8.7191e-11
60.8	3.166e-07	8.3772e-11
61	2.765e-07	8.0487e-11
61.2	2.381e-07	7.7331e-11
61.4	2.018e-07	7.4299e-11
61.6	1.683e-07	7.1386e-11
61.8	1.391e-07	6.8587e-11
62	1.144e-07	6.5897e-11
62.2	9.401e-08	6.3314e-11
62.4	7.769e-08	6.0831e-11
62.6	6.483e-08	5.8446e-11
62.8	5.387e-08	5.6154e-11
63	4.453e-08	5.3952e-11
63.2	3.628e-08	5.1837e-11
63.4	2.889e-08	4.9804e-11
63.6	2.219e-08	4.7851e-11
63.8	1.673e-08	4.5975e-11
64	1.241e-08	4.4172e-11
64.0859	6.9067e-09	2.6093e-09
64.172	5.7273e-09	2.1637e-09
64.2582	5.3622e-09	2.0258e-09
64.3447	5.2766e-09	1.9934e-09
64.4313	5.3579e-09	2.0241e-09
64.5181	5.4079e-09	2.0431e-09
64.6051	5.4166e-09	2.0464e-09
64.6923	5.3876e-09	2.0354e-09
64.7797	5.3194e-09	2.0096e-09
64.8673	5.2047e-09	1.9663e-09
64.9551	5.0378e-09	1.9032e-09
65.043	4.8193e-09	1.8207e-09
65.1312	4.5515e-09	1.7195e-09
65.2195	4.2445e-09	1.6035e-09
65.3081	3.9128e-09	1.4782e-09
65.3968	3.5898e-09	1.3562e-09
65.4857	3.2901e-09	1.2429e-09
65.5748	3.0201e-09	1.1409e-09
65.6642	2.7849e-09	1.0521e-09
65.7537	2.6463e-09	9.9973e-10
65.8434	2.5679e-09	9.7012e-10
65.9333	2.5018e-09	9.4517e-10
66.0234	2.4459e-09	9.2405e-10
66.1137	2.3959e-09	9.0513e-10
66.2042	2.2805e-09	8.6154e-10
66.2949	2.1527e-09	8.1328e-10
66.3858	2.0584e-09	7.7763e-10
66.4769	2.0003e-09	7.557e-10
66.5682	1.9807e-09	7.4829e-10
66.6598	2.0076e-09	7.5844e-10
66.7515	2.0504e-09	7.7462e-10
66.8434	2.1063e-09	7.9573e-10
66.9355	2.1636e-09	8.1739e-10
67.0278	2.2268e-09	8.4125e-10
67.1204	2.2972e-09	8.6784e-10
67.2131	2.377e-09	8.98e-10
67.3061	2.4735e-09	9.3447e-10
67.3992	2.578e-09	9.7396e-10
67.4926	2.6898e-09	1.0162e-09
67.5861	2.8088e-09	1.0612e-09
67.6799	2.9264e-09	1.1056e-09
67.7739	3.0295e-09	1.1445e-09
67.8681	3.1347e-09	1.1843e-09
67.9625	3.2378e-09	1.2232e-09
68.0571	3.3307e-09	1.2583e-09
68.152	3.4113e-09	1.2887e-09
68.247	3.4773e-09	1.3137e-09
68.3423	3.5281e-09	1.3329e-09
68.4377	3.576e-09	1.351e-09
68.5334	3.6138e-09	1.3652e-09
68.6293	3.6413e-09	1.3757e-09
68.7256	3.6696e-09	1.3864e-09
68.8222	3.7045e-09	1.3995e-09
68.9193	3.7625e-09	1.4215e-09
69.0171	3.8584e-09	1.4576e-09
69.1154	4.0013e-09	1.5117e-09
69.2143	4.1944e-09	1.5846e-09
69.3138	4.4332e-09	1.6748e-09
69.4139	4.6894e-09	1.7716e-09
69.5145	4.9637e-09	1.8753e-09
69.6157	5.2548e-09	1.9852e-09
69.7174	5.5575e-09	2.0995e-09
69.8197	5.8521e-09	2.2109e-09
69.9225	6.0982e-09	2.3038e-09
70.0259	6.2912e-09	2.3768e-09
70.1297	6.4255e-09	2.4275e-09
70.2341	6.5017e-09	2.4563e-09
70.339	6.5249e-09	2.4651e-09
70.4444	6.5257e-09	2.4653e-09
70.5503	6.501e-09	2.456e-09
70.6567	6.4531e-09	2.4379e-09
70.7636	6.3834e-09	2.4116e-09
70.871	6.3021e-09	2.3809e-09
70.9788	6.2194e-09	2.3496e-09
71.0871	6.141e-09	2.32e-09
71.1958	6.0655e-09	2.2915e-09
71.3049	5.9951e-09	2.2649e-09
71.4145	5.937e-09	2.243e-09
71.5245	5.8906e-09	2.2254e-09
71.635	5.8572e-09	2.2128e-09
71.7458	5.8369e-09	2.2051e-09
71.8571	5.8318e-09	2.2032e-09
71.9687	5.8376e-09	2.2054e-09
72.0807	5.8572e-09	2.2128e-09
72.1931	5.887e-09	2.224e-09
72.3058	5.9276e-09	2.2394e-09
72.4189	5.9755e-09	2.2575e-09
72.5323	6.0263e-09	2.2767e-09
72.6461	6.08e-09	2.297e-09
72.7602	6.1374e-09	2.3186e-09
72.8746	6.1867e-09	2.3373e-09
72.9893	6.2288e-09	2.3532e-09
73.1043	6.2615e-09	2.3655e-09
73.2196	6.2825e-09	2.3735e-09
73.3352	6.2898e-09	2.3762e-09
73.451	6.2891e-09	2.3759e-09
73.5671	6.2803e-09	2.3727e-09
73.6835	6.2658e-09	2.3672e-09
73.8001	6.2477e-09	2.3603e-09
73.9169	6.2332e-09	2.3548e-09
74.0339	6.2237e-09	2.3513e-09
74.1512	6.2165e-09	2.3485e-09
74.2686	6.2078e-09	2.3452e-09
74.3863	6.1998e-09	2.3422e-09
74.5041	6.1853e-09	2.3367e-09
74.6221	6.1649e-09	2.3291e-09
74.7402	6.141e-09	2.32e-09
74.8585	6.1178e-09	2.3112e-09
74.977	6.0902e-09	2.3008e-09
75.0956	6.059e-09	2.289e-09
75.2143	6.0234e-09	2.2756e-09
75.3331	5.9828e-09	2.2602e-09
75.452	5.9349e-09	2.2421e-09
75.5711	5.8797e-09	2.2213e-09
75.6902	5.8187e-09	2.1983e-09
75.8093	5.7505e-09	2.1725e-09
75.9283	5.6743e-09	2.1437e-09
76.0474	5.5916e-09	2.1124e-09
76.1664	5.5016e-09	2.0784e-09
76.2854	5.405e-09	2.042e-09
76.4043	5.3012e-09	2.0028e-09
76.5231	5.1938e-09	1.9622e-09
76.642	5.0784e-09	1.9186e-09
76.7608	4.955e-09	1.872e-09
76.8795	4.8229e-09	1.8221e-09
76.9982	4.6814e-09	1.7686e-09
77.1168	4.5297e-09	1.7113e-09
77.2355	4.37e-09	1.651e-09
77.354	4.2067e-09	1.5893e-09
77.4726	4.042e-09	1.527e-09
77.591	3.8801e-09	1.4659e-09
77.7095	3.727e-09	1.408e-09
77.8279	3.5869e-09	1.3551e-09
77.9463	3.4628e-09	1.3082e-09
78.0646	3.3546e-09	1.2674e-09
78.1829	3.2625e-09	1.2325e-09
78.3011	3.1565e-09	1.1925e-09
78.4193	3.0651e-09	1.1579e-09
78.5375	2.9105e-09	1.0995e-09
78.6556	0	0
78.7737	0	0

## Sheet: Profiles
depth	CO2	CH4	SF6	d15N
0	382.541	1837.43	6.64668	0
0.2	382.665	1837.71	6.64448	0.00042
0.4	382.79	1838	6.64221	0.00085
0.6	382.915	1838.29	6.63988	0.00129
0.8	383.04	1838.58	6.63748	0.00174
1	383.164	1838.87	6.63502	0.00219
1.2	383.288	1839.16	6.63249	0.00266
1.4	383.411	1839.45	6.62989	0.00314
1.6	383.534	1839.75	6.62722	0.00362
1.8	383.656	1840.04	6.62449	0.00412
2	383.777	1840.33	6.62168	0.00463
2.2	383.897	1840.63	6.6188	0.00514
2.4	384.015	1840.92	6.61585	0.00567
2.6	384.133	1841.22	6.61283	0.0062
2.8	384.25	1841.51	6.60973	0.00675
3	384.364	1841.81	6.60657	0.0073
3.2	384.478	1842.1	6.60332	0.00786
3.4	384.59	1842.39	6.60001	0.00843
3.6	384.7	1842.68	6.59662	0.00901
3.8	384.809	1842.97	6.59315	0.0096
4	384.915	1843.26	6.58961	0.0102
4.2	385.02	1843.55	6.586	0.01081
4.4	385.123	1843.84	6.58231	0.01143
4.6	385.224	1844.12	6.57854	0.01206
4.8	385.322	1844.4	6.5747	0.01269
5	385.419	1844.68	6.57079	0.01333
5.2	385.513	1844.96	6.56681	0.01398
5.4	385.605	1845.24	6.56274	0.01464
5.6	385.694	1845.51	6.55861	0.01531
5.8	385.781	1845.79	6.5544	0.01599
6	385.866	1846.06	6.55013	0.01667
6.2	385.948	1846.32	6.54577	0.01736
6.4	386.027	1846.59	6.54135	0.01806
6.6	386.104	1846.85	6.53686	0.01877
6.8	386.178	1847.11	6.5323	0.01949
7	386.25	1847.36	6.52767	0.02021
7.2	386.319	1847.61	6.52296	0.02094
7.4	386.385	1847.86	6.51819	0.02167
7.6	386.448	1848.11	6.51336	0.02241
7.8	386.509	1848.35	6.50845	0.02316
8	386.567	1848.59	6.50348	0.02392
8.2	386.623	1848.83	6.49844	0.02468
8.4	386.676	1849.06	6.49333	0.02545
8.6	386.726	1849.29	6.48815	0.02622
8.8	386.773	1849.52	6.48291	0.027
9	386.818	1849.74	6.47761	0.02778
9.2	386.86	1849.96	6.47225	0.02857
9.4	386.899	1850.18	6.46682	0.02937
9.6	386.936	1850.39	6.46132	0.03017
9.8	386.97	1850.6	6.45577	0.03097
10	387.001	1850.81	6.45016	0.03179
10.2	387.03	1851.01	6.44449	0.0326
10.4	387.056	1851.21	6.43876	0.03342
10.6	387.08	1851.4	6.43297	0.03424
10.8	387.101	1851.59	6.42712	0.03507
11	387.119	1851.78	6.42122	0.03591
11.2	387.135	1851.96	6.41526	0.03674
11.4	387.149	1852.14	6.40925	0.03758
11.6	387.16	1852.32	6.40318	0.03843
11.8	387.169	1852.49	6.39706	0.03928
12	387.175	1852.66	6.39088	0.04013
12.2	387.179	1852.83	6.38465	0.04098
12.4	387.181	1852.99	6.37837	0.04184
12.6	387.18	1853.15	6.37204	0.04271
12.8	387.178	1853.3	6.36565	0.04357
13	387.173	1853.46	6.35922	0.04444
13.2	387.166	1853.6	6.35274	0.04531
13.4	387.157	1853.75	6.3462	0.04618
13.6	387.145	1853.89	6.33962	0.04706
13.8	387.132	1854.02	6.33299	0.04794
14	387.117	1854.16	6.32632	0.04882
14.2	387.1	1854.29	6.3196	0.04971
14.4	387.08	1854.41	6.31285	0.0506
14.6	387.059	1854.54	6.30605	0.05148
14.8	387.037	1854.65	6.29922	0.05238
15	387.012	1854.77	6.29235	0.05327
15.2	386.986	1854.88	6.28544	0.05417
15.4	386.958	1854.99	6.27849	0.05507
15.6	386.928	1855.09	6.27152	0.05597
15.8	386.897	1855.19	6.26451	0.05687
16	386.864	1855.29	6.25748	0.05777
16.2	386.83	1855.39	6.25043	0.05868
16.4	386.794	1855.48	6.24334	0.05959
16.6	386.757	1855.56	6.23624	0.0605
16.8	386.719	1855.65	6.22911	0.06141
17	386.679	1855.73	6.22196	0.06232
17.2	386.638	1855.8	6.21479	0.06323
17.4	386.596	1855.88	6.20759	0.06415
17.6	386.552	1855.95	6.20037	0.06507
17.8	386.508	1856.01	6.19313	0.06598
18	386.462	1856.08	6.18586	0.0669
18.2	386.415	1856.14	6.17857	0.06782
18.4	386.367	1856.19	6.17126	0.06875
18.6	386.319	1856.25	6.16393	0.06967
18.8	386.269	1856.3	6.15659	0.07059
19	386.218	1856.34	6.14922	0.07152
19.2	386.166	1856.39	6.14184	0.07245
19.4	386.114	1856.43	6.13444	0.07337
19.6	386.061	1856.47	6.12702	0.0743
19.8	386.007	1856.51	6.11958	0.07523
20	385.952	1856.54	6.11212	0.07616
20.2	385.896	1856.57	6.10465	0.0771
20.4	385.84	1856.6	6.09715	0.07803
20.6	385.783	1856.62	6.08964	0.07896
20.8	385.725	1856.64	6.08211	0.0799
21	385.667	1856.66	6.07456	0.08083
21.2	385.608	1856.68	6.067	0.08177
21.4	385.549	1856.69	6.05942	0.0827
21.6	385.489	1856.7	6.05182	0.08364
21.8	385.429	1856.71	6.04421	0.08458
22	385.368	1856.72	6.03658	0.08551
22.2	385.307	1856.72	6.02893	0.08645
22.4	385.245	1856.72	6.02127	0.08739
22.6	385.183	1856.72	6.0136	0.08833
22.8	385.121	1856.72	6.00591	0.08927
23	385.058	1856.71	5.9982	0.09022
23.2	384.995	1856.71	5.99048	0.09116
23.4	384.932	1856.7	5.98275	0.0921
23.6	384.868	1856.68	5.975	0.09304
23.8	384.804	1856.67	5.96724	0.09398
24	384.74	1856.65	5.95946	0.09493
24.2	384.676	1856.63	5.95167	0.09587
24.4	384.611	1856.61	5.94387	0.09682
24.6	384.547	1856.59	5.93606	0.09776
24.8	384.482	1856.57	5.92823	0.09871
25	384.417	1856.54	5.92038	0.09965
25.2	384.353	1856.51	5.91253	0.1006
25.4	384.288	1856.48	5.90466	0.10154
25.6	384.222	1856.45	5.89678	0.10249
25.8	384.157	1856.42	5.88889	0.10344
26	384.092	1856.38	5.88098	0.10439
26.2	384.027	1856.34	5.87306	0.10533
26.4	383.962	1856.31	5.86512	0.10628
26.6	383.897	1856.27	5.85718	0.10723
26.8	383.832	1856.22	5.84922	0.10818
27	383.767	1856.18	5.84124	0.10913
27.2	383.702	1856.14	5.83326	0.11007
27.4	383.637	1856.09	5.82526	0.11102
27.6	383.572	1856.04	5.81724	0.11197
27.8	383.507	1855.99	5.80921	0.11292
28	383.442	1855.94	5.80117	0.11387
28.2	383.377	1855.89	5.79311	0.11482
28.4	383.313	1855.84	5.78503	0.11577
28.6	383.248	1855.78	5.77694	0.11672
28.8	383.184	1855.73	5.76884	0.11767
29	383.12	1855.67	5.76072	0.11862
29.2	383.056	1855.61	5.75258	0.11957
29.4	382.992	1855.55	5.74443	0.12052
29.6	382.928	1855.49	5.73626	0.12147
29.8	382.865	1855.43	5.72807	0.12243
30	382.801	1855.37	5.71987	0.12338
30.2	382.738	1855.3	5.71165	0.12433
30.4	382.675	1855.24	5.70341	0.12528
30.6	382.612	1855.17	5.69516	0.12623
30.8	382.55	1855.1	5.68689	0.12718
31	382.487	1855.04	5.6786	0.12813
31.2	382.425	1854.97	5.67029	0.12909
31.4	382.363	1854.9	5.66197	0.13004
31.6	382.301	1854.83	5.65362	0.13099
31.8	382.24	1854.75	5.64526	0.13194
32	382.178	1854.68	5.63688	0.13289
32.2	382.117	1854.61	5.62848	0.13384
32.4	382.056	1854.54	5.62006	0.1348
32.6	381.995	1854.46	5.61163	0.13575
32.8	381.935	1854.39	5.60317	0.1367
33	381.875	1854.31	5.59469	0.13765
33.2	381.815	1854.23	5.5862	0.1386
33.4	381.755	1854.16	5.57768	0.13956
33.6	381.695	1854.08	5.56914	0.14051
33.8	381.636	1854	5.56059	0.14146
34	381.577	1853.92	5.55201	0.14241
34.2	381.518	1853.84	5.54341	0.14337
34.4	381.459	1853.76	5.53479	0.14432
34.6	381.401	1853.68	5.52615	0.14527
34.8	381.343	1853.6	5.51748	0.14622
35	381.285	1853.52	5.5088	0.14717
35.2	381.227	1853.43	5.50009	0.14813
35.4	381.17	1853.35	5.49137	0.14908
35.6	381.113	1853.27	5.48262	0.15003
35.8	381.056	1853.19	5.47385	0.15098
36	380.999	1853.1	5.46506	0.15193
36.2	380.943	1853.02	5.45624	0.15289
36.4	380.886	1852.94	5.44741	0.15384
36.6	380.831	1852.85	5.43855	0.15479
36.8	380.775	1852.77	5.42968	0.15574
37	380.719	1852.68	5.42078	0.1567
37.2	380.664	1852.6	5.41187	0.15765
37.4	380.609	1852.51	5.40293	0.1586
37.6	380.554	1852.43	5.39398	0.15955
37.8	380.5	1852.34	5.385	0.1605
38	380.446	1852.26	5.37601	0.16145
38.2	380.392	1852.17	5.36699	0.16241
38.4	380.338	1852.08	5.35796	0.16336
38.6	380.284	1852	5.34891	0.16431
38.8	380.231	1851.91	5.33984	0.16526
39	380.178	1851.83	5.33075	0.16621
39.2	380.125	1851.74	5.32165	0.16716
39.4	380.072	1851.66	5.31253	0.16812
39.6	380.019	1851.57	5.30339	0.16907
39.8	379.967	1851.49	5.29423	0.17002
40	379.915	1851.4	5.28506	0.17097
40.2	379.863	1851.32	5.27587	0.17192
40.4	379.812	1851.23	5.26666	0.17287
40.6	379.76	1851.15	5.25744	0.17382
40.8	379.709	1851.06	5.2482	0.17478
41	379.658	1850.98	5.23894	0.17573
41.2	379.607	1850.9	5.22968	0.17668
41.4	379.556	1850.81	5.22039	0.17763
41.6	379.506	1850.73	5.2111	0.17858
41.8	379.455	1850.65	5.20178	0.17953
42	379.405	1850.56	5.19246	0.18048
42.2	379.355	1850.48	5.18313	0.18143
42.4	379.305	1850.4	5.17379	0.18238
42.6	379.255	1850.32	5.16443	0.18333
42.8	379.206	1850.24	5.15507	0.18428
43	379.156	1850.16	5.14569	0.18524
43.2	379.107	1850.08	5.1363	0.18619
43.4	379.058	1850	5.12691	0.18714
43.6	379.009	1849.92	5.1175	0.18809
43.8	378.96	1849.84	5.10808	0.18904
44	378.911	1849.76	5.09865	0.18999
44.2	378.863	1849.68	5.08921	0.19094
44.4	378.814	1849.61	5.07975	0.19189
44.6	378.766	1849.53	5.07029	0.19284
44.8	378.717	1849.45	5.06081	0.19379
45	378.669	1849.38	5.05132	0.19474
45.2	378.62	1849.3	5.04183	0.19569
45.4	378.572	1849.23	5.03232	0.19664
45.6	378.524	1849.15	5.0228	0.19759
45.8	378.476	1849.08	5.01326	0.19854
46	378.428	1849.01	5.00372	0.19948
46.2	378.379	1848.94	4.99416	0.20043
46.4	378.331	1848.86	4.98458	0.20138
46.6	378.283	1848.79	4.975	0.20233
46.8	378.235	1848.72	4.9654	0.20328
47	378.187	1848.65	4.95579	0.20423
47.2	378.139	1848.58	4.94616	0.20518
47.4	378.09	1848.51	4.93651	0.20613
47.6	378.042	1848.44	4.92685	0.20708
47.8	377.994	1848.38	4.91718	0.20803
48	377.945	1848.31	4.90748	0.20897
48.2	377.897	1848.24	4.89778	0.20992
48.4	377.848	1848.18	4.88805	0.21087
48.6	377.8	1848.11	4.87831	0.21182
48.8	377.751	1848.04	4.86855	0.21277
49	377.702	1847.98	4.85877	0.21371
49.2	377.653	1847.92	4.84897	0.21466
49.4	377.604	1847.85	4.83915	0.21561
49.6	377.555	1847.79	4.8293	0.21656
49.8	377.505	1847.73	4.81944	0.2175
50	377.456	1847.66	4.80955	0.21845
50.2	377.406	1847.6	4.79963	0.2194
50.4	377.356	1847.54	4.78969	0.22035
50.6	377.306	1847.48	4.77972	0.22129
50.8	377.255	1847.42	4.76971	0.22224
51	377.204	1847.36	4.75968	0.22319
51.2	377.153	1847.3	4.7496	0.22413
51.4	377.102	1847.24	4.73948	0.22508
51.6	377.05	1847.18	4.72932	0.22602
51.8	376.998	1847.12	4.71911	0.22697
52	376.946	1847.07	4.70884	0.22792
52.2	376.893	1847.01	4.69851	0.22886
52.4	376.84	1846.95	4.68812	0.22981
52.6	376.786	1846.89	4.67766	0.23075
52.8	376.732	1846.84	4.66712	0.23169
53	376.677	1846.78	4.6565	0.23264
53.2	376.621	1846.72	4.64578	0.23358
53.4	376.565	1846.66	4.63497	0.23453
53.6	376.508	1846.61	4.62404	0.23547
53.8	376.451	1846.55	4.613	0.23641
54	376.392	1846.49	4.60182	0.23735
54.2	376.333	1846.43	4.5905	0.2383
54.4	376.272	1846.37	4.579	0.23924
54.6	376.21	1846.32	4.56733	0.24018
54.8	376.147	1846.26	4.55546	0.24112
55	376.083	1846.2	4.54338	0.24206
55.2	376.017	1846.14	4.53109	0.243
55.4	375.95	1846.07	4.51858	0.24393
55.6	375.882	1846.01	4.50585	0.24487
55.8	375.812	1845.95	4.49291	0.24581
56	375.741	1845.88	4.47974	0.24674
56.2	375.668	1845.82	4.46636	0.24768
56.4	375.594	1845.75	4.4528	0.24861
56.6	375.519	1845.69	4.43905	0.24954
56.8	375.443	1845.62	4.42516	0.25048
57	375.365	1845.56	4.41115	0.25141
57.2	375.287	1845.49	4.39703	0.25234
57.4	375.208	1845.42	4.38283	0.25327
57.6	375.129	1845.35	4.36856	0.2542
57.8	375.049	1845.28	4.35422	0.25513
58	374.968	1845.21	4.33983	0.25606
58.2	374.886	1845.14	4.32536	0.25699
58.4	374.804	1845.07	4.31078	0.25792
58.6	374.72	1845	4.29606	0.25885
58.8	374.635	1844.92	4.28116	0.25977
59	374.548	1844.85	4.26602	0.2607
59.2	374.459	1844.77	4.25061	0.26162
59.4	374.368	1844.69	4.23486	0.26254
59.6	374.274	1844.6	4.21873	0.26346
59.8	374.177	1844.51	4.20214	0.26438
60	374.077	1844.42	4.18497	0.2653
60.2	373.971	1844.32	4.16711	0.26621
60.4	373.86	1844.21	4.14839	0.26712
60.6	373.741	1844.1	4.12862	0.26802
60.8	373.615	1843.97	4.10757	0.26892
61	373.477	1843.83	4.08495	0.26981
61.2	373.328	1843.67	4.06043	0.27069
61.4	373.162	1843.49	4.03353	0.27157
61.6	372.976	1843.29	4.00366	0.27242
61.8	372.766	1843.04	3.9702	0.27326
62	372.527	1842.75	3.93258	0.27408
62.2	372.256	1842.41	3.89036	0.27488
62.4	371.95	1842	3.84331	0.27564
62.6	371.608	1841.52	3.79157	0.27637
62.8	371.23	1840.96	3.73526	0.27706
63	370.811	1840.29	3.67417	0.27771
63.2	370.346	1839.5	3.60783	0.2783
63.4	369.821	1838.53	3.53512	0.27882
63.6	369.214	1837.32	3.45376	0.27923
63.8	368.499	1835.8	3.36083	0.27947
64	367.686	1833.95	3.25862	0.27947
64.086	367.308	1832.99	3.21409	0.27947
64.172	366.875	1831.8	3.16474	0.27947
64.258	366.368	1830.35	3.1035	0.27947
64.345	365.796	1828.71	3.03276	0.27947
64.431	365.2	1826.96	2.96001	0.27947
64.518	364.613	1825.19	2.88966	0.27947
64.605	364.047	1823.41	2.82259	0.27947
64.692	363.504	1821.63	2.75864	0.27947
64.78	362.981	1819.85	2.69731	0.27947
64.867	362.474	1818.06	2.63812	0.27947
64.955	361.977	1816.25	2.58057	0.27947
65.043	361.486	1814.39	2.52418	0.27947
65.131	360.997	1812.46	2.46846	0.27947
65.22	360.502	1810.43	2.41287	0.27947
65.308	359.995	1808.27	2.35681	0.27947
65.397	359.472	1805.95	2.29978	0.27947
65.486	358.926	1803.42	2.24138	0.27947
65.575	358.356	1800.65	2.18135	0.27947
65.664	357.756	1797.61	2.11943	0.27947
65.754	357.129	1794.3	2.05588	0.27947
65.843	356.487	1790.76	1.99181	0.27947
65.933	355.837	1787.01	1.92825	0.27947
66.023	355.185	1783.08	1.86576	0.27947
66.114	354.534	1778.99	1.80473	0.27947
66.204	353.878	1774.67	1.74483	0.27947
66.295	353.203	1770.03	1.685	0.27947
66.386	352.5	1764.97	1.62439	0.27947
66.477	351.764	1759.45	1.56287	0.27947
66.568	351	1753.49	1.50079	0.27947
66.66	350.217	1747.16	1.43893	0.27947
66.751	349.425	1740.53	1.37811	0.27947
66.843	348.631	1733.67	1.31883	0.27947
66.936	347.84	1726.61	1.26128	0.27947
67.028	347.05	1719.38	1.20544	0.27947
67.12	346.263	1711.98	1.15131	0.27947
67.213	345.48	1704.44	1.0989	0.27947
67.306	344.705	1696.81	1.04834	0.27947
67.399	343.941	1689.13	0.9998	0.27947
67.493	343.191	1681.44	0.95337	0.27947
67.586	342.458	1673.79	0.90914	0.27947
67.68	341.742	1666.18	0.86711	0.27947
67.774	341.044	1658.63	0.82717	0.27947
67.868	340.361	1651.12	0.78918	0.27947
67.963	339.694	1643.67	0.75305	0.27947
68.057	339.042	1636.26	0.71869	0.27947
68.152	338.402	1628.89	0.68598	0.27947
68.247	337.773	1621.53	0.65475	0.27947
68.342	337.151	1614.15	0.62485	0.27947
68.438	336.536	1606.74	0.59611	0.27947
68.533	335.925	1599.29	0.56843	0.27947
68.629	335.315	1591.76	0.54169	0.27947
68.726	334.705	1584.13	0.51575	0.27947
68.822	334.094	1576.4	0.49051	0.27947
68.919	333.48	1568.56	0.4659	0.27947
69.017	332.866	1560.65	0.44196	0.27947
69.115	332.257	1552.75	0.4188	0.27947
69.214	331.659	1544.93	0.39663	0.27947
69.314	331.08	1537.31	0.37562	0.27947
69.414	330.523	1529.94	0.35588	0.27947
69.514	329.991	1522.86	0.33744	0.27947
69.616	329.484	1516.07	0.32027	0.27947
69.717	329.004	1509.61	0.30434	0.27947
69.82	328.551	1503.45	0.28961	0.27947
69.922	328.121	1497.58	0.27596	0.27947
70.026	327.711	1491.94	0.26326	0.27947
70.13	327.318	1486.49	0.25137	0.27947
70.234	326.937	1481.17	0.24015	0.27947
70.339	326.566	1475.95	0.22949	0.27947
70.444	326.202	1470.78	0.21932	0.27947
70.55	325.844	1465.66	0.20958	0.27947
70.657	325.49	1460.55	0.20022	0.27947
70.764	325.14	1455.45	0.19121	0.27947
70.871	324.791	1450.33	0.18251	0.27947
70.979	324.444	1445.2	0.1741	0.27947
71.087	324.098	1440.03	0.16597	0.27947
71.196	323.753	1434.84	0.15811	0.27947
71.305	323.409	1429.62	0.15051	0.27947
71.415	323.066	1424.38	0.14317	0.27947
71.525	322.725	1419.12	0.13608	0.27947
71.635	322.385	1413.85	0.12925	0.27947
71.746	322.048	1408.59	0.12268	0.27947
71.857	321.713	1403.33	0.11636	0.27947
71.969	321.382	1398.09	0.11032	0.27947
72.081	321.056	1392.89	0.10453	0.27947
72.193	320.734	1387.73	0.099	0.27947
72.306	320.417	1382.63	0.09373	0.27947
72.419	320.106	1377.6	0.08873	0.27947
72.532	319.801	1372.64	0.08397	0.27947
72.646	319.503	1367.76	0.07946	0.27947
72.76	319.211	1362.96	0.07518	0.27947
72.875	318.926	1358.25	0.07114	0.27947
72.989	318.647	1353.62	0.06731	0.27947
73.104	318.375	1349.08	0.06368	0.27947
73.22	318.108	1344.61	0.06025	0.27947
73.335	317.847	1340.21	0.057	0.27947
73.451	317.591	1335.87	0.05391	0.27947
73.567	317.34	1331.6	0.05098	0.27947
73.683	317.092	1327.38	0.0482	0.27947
73.8	316.849	1323.21	0.04555	0.27947
73.917	316.61	1319.09	0.04303	0.27947
74.034	316.376	1315.03	0.04064	0.27947
74.151	316.145	1311.04	0.03838	0.27947
74.269	315.919	1307.1	0.03623	0.27947
74.386	315.697	1303.23	0.03419	0.27947
74.504	315.48	1299.42	0.03227	0.27947
74.622	315.268	1295.68	0.03045	0.27947
74.74	315.059	1292	0.02872	0.27947
74.859	314.855	1288.39	0.02709	0.27947
74.977	314.655	1284.84	0.02554	0.27947
75.096	314.46	1281.36	0.02409	0.27947
75.214	314.268	1277.95	0.02271	0.27947
75.333	314.081	1274.6	0.0214	0.27947
75.452	313.898	1271.32	0.02017	0.27947
75.571	313.718	1268.1	0.01901	0.27947
75.69	313.543	1264.94	0.01792	0.27947
75.809	313.372	1261.85	0.01688	0.27947
75.928	313.204	1258.83	0.0159	0.27947
76.047	313.041	1255.87	0.01498	0.27947
76.166	312.881	1252.97	0.01411	0.27947
76.285	312.724	1250.13	0.01329	0.27947
76.404	312.571	1247.35	0.01252	0.27947
76.523	312.422	1244.64	0.01179	0.27947
76.642	312.277	1241.99	0.0111	0.27947
76.761	312.135	1239.4	0.01046	0.27947
76.879	311.996	1236.87	0.00985	0.27947
76.998	311.861	1234.41	0.00927	0.27947
77.117	311.729	1232	0.00873	0.27947
77.235	311.601	1229.65	0.00822	0.27947
77.354	311.475	1227.37	0.00774	0.27947
77.473	311.353	1225.15	0.00729	0.27947
77.591	311.235	1222.99	0.00686	0.27947
77.71	311.121	1220.92	0.00646	0.27947
77.828	311.011	1218.93	0.00609	0.27947
77.946	310.907	1217.05	0.00574	0.27947
78.065	310.809	1215.3	0.00543	0.27947
78.183	310.72	1213.71	0.00514	0.27947
78.301	310.641	1212.3	0.00489	0.27947
78.419	310.573	1211.11	0.00468	0.27947
78.537	310.521	1210.2	0.00451	0.27947
78.656	310.472	1209.33	0.00437	0.27947
78.774	310.411	1208.22	0.0042	0.27947

## Sheet: Scenarios
depth	SCEN1	SCEN2	SCEN3	SCEN4
0	0	0.9999	0	0.00198
0.2	-3e-05	0.9991	2e-05	5.327
0.4	-7e-05	0.9982	3e-05	10.6266
0.6	-0.00011	0.9972	5e-05	15.9008
0.8	-0.00015	0.9963	7e-05	21.1496
1	-0.00019	0.9953	9e-05	26.373
1.2	-0.00023	0.9943	0.00011	31.5709
1.4	-0.00027	0.9933	0.00013	36.7435
1.6	-0.00032	0.9922	0.00015	41.8905
1.8	-0.00037	0.9912	0.00017	47.0125
2	-0.00041	0.9902	0.0002	52.1084
2.2	-0.00047	0.9891	0.00022	57.18
2.4	-0.00052	0.9879	0.00025	62.2244
2.6	-0.00057	0.9868	0.00027	67.2463
2.8	-0.00063	0.9856	0.0003	72.2382
3	-0.00069	0.9844	0.00033	77.2119
3.2	-0.00075	0.9832	0.00036	82.1492
3.4	-0.00081	0.9821	0.00039	87.0777
3.6	-0.00088	0.9808	0.00042	91.9562
3.8	-0.00094	0.9795	0.00045	96.8454
4	-0.00101	0.9783	0.00048	101.657
4.2	-0.00108	0.977	0.00052	106.517
4.4	-0.00116	0.9757	0.00056	111.25
4.6	-0.00123	0.9744	0.00059	116.096
4.8	-0.00131	0.9731	0.00063	120.732
5	-0.00139	0.9718	0.00067	125.585
5.2	-0.00147	0.9704	0.00072	130.1
5.4	-0.00155	0.969	0.00076	134.984
5.6	-0.00164	0.9676	0.00081	139.356
5.8	-0.00172	0.9661	0.00085	144.291
6	-0.00181	0.9647	0.0009	148.504
6.2	-0.0019	0.9632	0.00095	153.499
6.4	-0.002	0.9618	0.00101	157.557
6.6	-0.00209	0.9603	0.00106	162.594
6.8	-0.00219	0.9588	0.00112	166.526
7	-0.00229	0.9573	0.00118	171.565
7.2	-0.00239	0.9558	0.00124	175.423
7.4	-0.00249	0.9542	0.0013	180.404
7.6	-0.00259	0.9527	0.00137	184.248
7.8	-0.0027	0.9511	0.00144	189.12
8	-0.00281	0.9496	0.00151	192.988
8.2	-0.00292	0.948	0.00158	197.73
8.4	-0.00303	0.9464	0.00166	201.621
8.6	-0.00314	0.9448	0.00174	206.259
8.8	-0.00326	0.9431	0.00182	210.128
9	-0.00338	0.9416	0.0019	214.719
9.2	-0.00349	0.9399	0.00199	218.505
9.4	-0.00361	0.9382	0.00208	223.102
9.6	-0.00374	0.9365	0.00217	226.772
9.8	-0.00386	0.9349	0.00227	231.385
10	-0.00399	0.9332	0.00237	234.956
10.2	-0.00411	0.9315	0.00247	239.544
10.4	-0.00424	0.9297	0.00257	243.072
10.6	-0.00437	0.928	0.00268	247.577
10.8	-0.00451	0.9263	0.00279	251.11
11	-0.00464	0.9245	0.00291	255.508
11.2	-0.00478	0.9227	0.00303	259.044
11.4	-0.00491	0.921	0.00315	263.362
11.6	-0.00505	0.9192	0.00328	266.856
11.8	-0.00519	0.9174	0.00341	271.149
12	-0.00533	0.9157	0.00355	274.552
12.2	-0.00548	0.9138	0.00369	278.852
12.4	-0.00562	0.912	0.00383	282.161
12.6	-0.00577	0.9102	0.00398	286.446
12.8	-0.00591	0.9084	0.00413	289.704
13	-0.00606	0.9065	0.00429	293.924
13.2	-0.00621	0.9047	0.00445	297.177
13.4	-0.00637	0.9028	0.00461	301.306
13.6	-0.00652	0.9009	0.00478	304.558
13.8	-0.00667	0.8991	0.00496	308.62
14	-0.00683	0.8972	0.00514	311.833
14.2	-0.00699	0.8953	0.00532	315.874
14.4	-0.00715	0.8934	0.00551	319.011
14.6	-0.00731	0.8914	0.00571	323.056
14.8	-0.00747	0.8896	0.00591	326.119
15	-0.00763	0.8877	0.00611	330.147
15.2	-0.00779	0.8857	0.00632	333.178
15.4	-0.00796	0.8838	0.00654	337.149
15.6	-0.00812	0.8819	0.00676	340.183
15.8	-0.00829	0.8799	0.00698	344.086
16	-0.00845	0.878	0.00722	347.12
16.2	-0.00862	0.8761	0.00745	350.985
16.4	-0.00879	0.8741	0.0077	353.985
16.6	-0.00896	0.8722	0.00795	357.85
16.8	-0.00913	0.8702	0.0082	360.79
17	-0.0093	0.8683	0.00846	364.662
17.2	-0.00947	0.8663	0.00873	367.556
17.4	-0.00965	0.8644	0.009	371.406
17.6	-0.00982	0.8625	0.00928	374.289
17.8	-0.01	0.8604	0.00957	378.087
18	-0.01017	0.8585	0.00986	380.976
18.2	-0.01035	0.8565	0.01015	384.723
18.4	-0.01052	0.8546	0.01046	387.599
18.6	-0.0107	0.8526	0.01077	391.325
18.8	-0.01088	0.8506	0.01108	394.159
19	-0.01106	0.8487	0.0114	397.886
19.2	-0.01124	0.8466	0.01173	400.668
19.4	-0.01142	0.8447	0.01207	404.389
19.6	-0.0116	0.8428	0.01241	407.142
19.8	-0.01178	0.8408	0.01275	410.829
20	-0.01197	0.8387	0.0131	413.577
20.2	-0.01215	0.8368	0.01346	417.214
20.4	-0.01233	0.8348	0.01383	419.959
20.6	-0.01252	0.8328	0.0142	423.561
20.8	-0.0127	0.8308	0.01458	426.28
21	-0.01289	0.8288	0.01496	429.871
21.2	-0.01308	0.8268	0.01535	432.545
21.4	-0.01326	0.8249	0.01575	436.133
21.6	-0.01345	0.8229	0.01615	438.767
21.8	-0.01364	0.8209	0.01656	442.336
22	-0.01383	0.8189	0.01697	444.952
22.2	-0.01402	0.8169	0.01739	448.482
22.4	-0.01421	0.8149	0.01782	451.093
22.6	-0.0144	0.8129	0.01825	454.582
22.8	-0.01459	0.8109	0.01868	457.18
23	-0.01479	0.8089	0.01913	460.644
23.2	-0.01498	0.8069	0.01958	463.21
23.4	-0.01517	0.8049	0.02003	466.665
23.6	-0.01537	0.8029	0.02049	469.19
23.8	-0.01556	0.8009	0.02096	472.636
24	-0.01576	0.7989	0.02143	475.13
24.2	-0.01595	0.7968	0.0219	478.55
24.4	-0.01615	0.7948	0.02238	481.031
24.6	-0.01635	0.7928	0.02287	484.413
24.8	-0.01654	0.7908	0.02336	486.886
25	-0.01674	0.7888	0.02386	490.234
25.2	-0.01694	0.7869	0.02436	492.687
25.4	-0.01714	0.7848	0.02487	496.016
25.6	-0.01734	0.7828	0.02538	498.436
25.8	-0.01754	0.7808	0.02589	501.754
26	-0.01774	0.7788	0.02641	504.138
26.2	-0.01794	0.7768	0.02694	507.443
26.4	-0.01815	0.7748	0.02747	509.802
26.6	-0.01835	0.7728	0.028	513.079
26.8	-0.01855	0.7708	0.02854	515.425
27	-0.01876	0.7688	0.02908	518.667
27.2	-0.01896	0.7668	0.02963	521.002
27.4	-0.01917	0.7648	0.03017	524.214
27.6	-0.01937	0.7628	0.03073	526.528
27.8	-0.01958	0.7607	0.03128	529.722
28	-0.01978	0.7587	0.03184	532.004
28.2	-0.01999	0.7567	0.03241	535.186
28.4	-0.0202	0.7547	0.03298	537.435
28.6	-0.02041	0.7527	0.03355	540.602
28.8	-0.02062	0.7507	0.03412	542.827
29	-0.02083	0.7487	0.0347	545.968
29.2	-0.02104	0.7466	0.03527	548.18
29.4	-0.02125	0.7447	0.03586	551.289
29.6	-0.02146	0.7426	0.03644	553.488
29.8	-0.02167	0.7406	0.03703	556.569
30	-0.02189	0.7386	0.03762	558.747
30.2	-0.0221	0.7365	0.03821	561.808
30.4	-0.02231	0.7345	0.03881	563.959
30.6	-0.02253	0.7325	0.0394	567.006
30.8	-0.02274	0.7305	0.04	569.126
31	-0.02296	0.7285	0.0406	572.158
31.2	-0.02318	0.7265	0.0412	574.254
31.4	-0.0234	0.7244	0.04181	577.264
31.6	-0.02361	0.7224	0.04242	579.343
31.8	-0.02383	0.7203	0.04302	582.325
32	-0.02405	0.7184	0.04363	584.39
32.2	-0.02427	0.7163	0.04425	587.344
32.4	-0.02449	0.7143	0.04486	589.391
32.6	-0.02472	0.7123	0.04547	592.323
32.8	-0.02494	0.7102	0.04609	594.346
33	-0.02516	0.7082	0.0467	597.262
33.2	-0.02539	0.7062	0.04732	599.258
33.4	-0.02561	0.7042	0.04794	602.158
33.6	-0.02584	0.7021	0.04856	604.128
33.8	-0.02606	0.7001	0.04918	607.011
34	-0.02629	0.6981	0.0498	608.961
34.2	-0.02652	0.696	0.05042	611.82
34.4	-0.02674	0.6941	0.05105	613.754
34.6	-0.02697	0.692	0.05167	616.586
34.8	-0.0272	0.69	0.05229	618.505
35	-0.02743	0.688	0.05292	621.313
35.2	-0.02767	0.6859	0.05354	623.212
35.4	-0.0279	0.6839	0.05417	626
35.6	-0.02813	0.6818	0.05479	627.876
35.8	-0.02836	0.6799	0.05542	630.648
36	-0.0286	0.6778	0.05605	632.498
36.2	-0.02883	0.6758	0.05667	635.254
36.4	-0.02907	0.6737	0.0573	637.081
36.6	-0.02931	0.6717	0.05793	639.819
36.8	-0.02954	0.6697	0.05855	641.627
37	-0.02978	0.6677	0.05918	644.342
37.2	-0.03002	0.6657	0.05981	646.134
37.4	-0.03026	0.6636	0.06043	648.825
37.6	-0.0305	0.6616	0.06106	650.601
37.8	-0.03074	0.6596	0.06169	653.269
38	-0.03098	0.6576	0.06231	655.026
38.2	-0.03122	0.6556	0.06294	657.674
38.4	-0.03147	0.6536	0.06357	659.41
38.6	-0.03171	0.6516	0.06419	662.041
38.8	-0.03196	0.6496	0.06482	663.753
39	-0.0322	0.6476	0.06545	666.368
39.2	-0.03245	0.6456	0.06607	668.058
39.4	-0.03269	0.6435	0.0667	670.656
39.6	-0.03294	0.6416	0.06732	672.327
39.8	-0.03319	0.6396	0.06795	674.905
40	-0.03343	0.6376	0.06857	676.559
40.2	-0.03368	0.6356	0.06919	679.115
40.4	-0.03393	0.6336	0.06982	680.752
40.6	-0.03418	0.6316	0.07044	683.287
40.8	-0.03443	0.6297	0.07106	684.907
41	-0.03468	0.6277	0.07169	687.42
41.2	-0.03494	0.6257	0.07231	689.021
41.4	-0.03519	0.6238	0.07293	691.516
41.6	-0.03544	0.6218	0.07355	693.096
41.8	-0.03569	0.6198	0.07417	695.575
42	-0.03595	0.6179	0.07479	697.134
42.2	-0.0362	0.616	0.07541	699.597
42.4	-0.03646	0.614	0.07603	701.135
42.6	-0.03671	0.6121	0.07665	703.581
42.8	-0.03697	0.6102	0.07727	705.102
43	-0.03722	0.6083	0.07789	707.529
43.2	-0.03748	0.6064	0.07851	709.033
43.4	-0.03773	0.6044	0.07912	711.44
43.6	-0.03799	0.6026	0.07974	712.928
43.8	-0.03825	0.6007	0.08036	715.314
44	-0.03851	0.5988	0.08098	716.785
44.2	-0.03877	0.5969	0.08159	719.151
44.4	-0.03902	0.595	0.08221	720.604
44.6	-0.03928	0.5932	0.08282	722.952
44.8	-0.03954	0.5913	0.08344	724.385
45	-0.0398	0.5894	0.08405	726.717
45.2	-0.04006	0.5876	0.08466	728.131
45.4	-0.04032	0.5857	0.08528	730.447
45.6	-0.04059	0.5839	0.08589	731.842
45.8	-0.04085	0.5821	0.0865	734.142
46	-0.04111	0.5802	0.08711	735.519
46.2	-0.04137	0.5784	0.08773	737.802
46.4	-0.04164	0.5766	0.08834	739.163
46.6	-0.0419	0.5748	0.08895	741.428
46.8	-0.04216	0.5729	0.08956	742.773
47	-0.04243	0.5712	0.09017	745.019
47.2	-0.04269	0.5694	0.09077	746.348
47.4	-0.04296	0.5676	0.09138	748.575
47.6	-0.04322	0.5658	0.09199	749.887
47.8	-0.04349	0.564	0.0926	752.096
48	-0.04376	0.5622	0.0932	753.39
48.2	-0.04403	0.5605	0.09381	755.582
48.4	-0.04429	0.5587	0.09441	756.858
48.6	-0.04456	0.557	0.09502	759.034
48.8	-0.04483	0.5552	0.09562	760.292
49	-0.0451	0.5535	0.09623	762.453
49.2	-0.04537	0.5517	0.09683	763.694
49.4	-0.04564	0.55	0.09743	765.84
49.6	-0.04591	0.5483	0.09803	767.064
49.8	-0.04619	0.5466	0.09863	769.194
50	-0.04646	0.5448	0.09923	770.403
50.2	-0.04673	0.5431	0.09983	772.516
50.4	-0.04701	0.5414	0.10043	773.71
50.6	-0.04728	0.5397	0.10103	775.806
50.8	-0.04756	0.538	0.10163	776.984
51	-0.04784	0.5363	0.10222	779.063
51.2	-0.04812	0.5346	0.10282	780.225
51.4	-0.04839	0.5329	0.10341	782.286
51.6	-0.04868	0.5312	0.10401	783.432
51.8	-0.04896	0.5295	0.1046	785.477
52	-0.04924	0.5277	0.10519	786.606
52.2	-0.04953	0.526	0.10578	788.635
52.4	-0.04981	0.5243	0.10637	789.748
52.6	-0.0501	0.5226	0.10696	791.762
52.8	-0.05039	0.5209	0.10754	792.858
53	-0.05069	0.5192	0.10812	794.858
53.2	-0.05098	0.5174	0.1087	795.938
53.4	-0.05128	0.5157	0.10928	797.924
53.6	-0.05158	0.5139	0.10985	798.99
53.8	-0.05189	0.5121	0.11043	800.961
54	-0.05219	0.5104	0.11099	802.012
54.2	-0.05251	0.5086	0.11156	803.968
54.4	-0.05282	0.5068	0.11212	805.005
54.6	-0.05314	0.5049	0.11267	806.945
54.8	-0.05347	0.5031	0.11322	807.968
55	-0.0538	0.5012	0.11376	809.892
55.2	-0.05414	0.4993	0.1143	810.9
55.4	-0.05448	0.4974	0.11483	812.808
55.6	-0.05483	0.4954	0.11536	813.801
55.8	-0.05519	0.4935	0.11587	815.694
56	-0.05555	0.4915	0.11639	816.672
56.2	-0.05591	0.4895	0.1169	818.549
56.4	-0.05629	0.4875	0.1174	819.512
56.6	-0.05666	0.4855	0.1179	821.375
56.8	-0.05704	0.4834	0.11839	822.322
57	-0.05742	0.4814	0.11889	824.172
57.2	-0.05781	0.4793	0.11938	825.104
57.4	-0.05819	0.4773	0.11987	826.941
57.6	-0.05858	0.4752	0.12036	827.859
57.8	-0.05897	0.4732	0.12086	829.683
58	-0.05936	0.4712	0.12135	830.588
58.2	-0.05975	0.4691	0.12185	832.399
58.4	-0.06014	0.4671	0.12235	833.291
58.6	-0.06053	0.465	0.12285	835.088
58.8	-0.06093	0.4629	0.12335	835.967
59	-0.06134	0.4608	0.12384	837.751
59.2	-0.06175	0.4586	0.12434	838.617
59.4	-0.06216	0.4564	0.12484	840.386
59.6	-0.06259	0.4541	0.12533	841.239
59.8	-0.06302	0.4517	0.12582	842.995
60	-0.06347	0.4493	0.1263	843.834
60.2	-0.06394	0.4467	0.12678	845.575
60.4	-0.06442	0.444	0.12726	846.401
60.6	-0.06493	0.441	0.12772	848.128
60.8	-0.06547	0.4379	0.12817	848.94
61	-0.06604	0.4345	0.1286	850.654
61.2	-0.06665	0.4308	0.12902	851.453
61.4	-0.06732	0.4266	0.12941	853.153
61.6	-0.06805	0.4219	0.12978	853.938
61.8	-0.06885	0.4167	0.13012	855.627
62	-0.06974	0.4107	0.13042	856.399
62.2	-0.07073	0.4039	0.13068	858.076
62.4	-0.07179	0.3962	0.13092	858.836
62.6	-0.07293	0.3879	0.13112	860.501
62.8	-0.07413	0.3787	0.1313	861.249
63	-0.07538	0.3687	0.13147	862.903
63.2	-0.07667	0.3577	0.13162	863.64
63.4	-0.07798	0.3454	0.13176	865.283
63.6	-0.07935	0.3313	0.13188	866.009
63.8	-0.08081	0.3151	0.13199	867.639
64	-0.08225	0.2979	0.13199	868.358
64.086	-0.08266	0.29	0.13199	868.623
64.172	-0.083	0.2802	0.13199	868.909
64.258	-0.08368	0.2683	0.13199	869.337
64.345	-0.08468	0.2555	0.13199	869.821
64.431	-0.08568	0.2432	0.13199	870.305
64.518	-0.08656	0.232	0.13199	870.774
64.605	-0.08734	0.2219	0.13199	871.229
64.692	-0.08805	0.2126	0.13199	871.671
64.78	-0.08871	0.204	0.13199	872.104
64.867	-0.08934	0.196	0.13199	872.528
64.955	-0.08994	0.1885	0.13199	872.944
65.043	-0.09051	0.1814	0.13199	873.353
65.131	-0.09104	0.1745	0.13199	873.759
65.22	-0.09153	0.1678	0.13199	874.164
65.308	-0.09198	0.1612	0.13199	874.57
65.397	-0.09238	0.1546	0.13199	874.983
65.486	-0.09273	0.1479	0.13199	875.404
65.575	-0.09302	0.1413	0.13199	875.835
65.664	-0.09324	0.1345	0.13199	876.28
65.754	-0.09341	0.1278	0.13199	876.739
65.843	-0.09352	0.1213	0.13199	877.207
65.933	-0.09356	0.115	0.13199	877.679
66.023	-0.09353	0.1091	0.13199	878.151
66.114	-0.09341	0.1035	0.13199	878.619
66.204	-0.0932	0.0981	0.13199	879.082
66.295	-0.09286	0.09282	0.13199	879.548
66.386	-0.09241	0.08757	0.13199	880.023
66.477	-0.09186	0.08235	0.13199	880.51
66.568	-0.09121	0.07721	0.13199	881.008
66.66	-0.09052	0.07223	0.13199	881.516
66.751	-0.08979	0.06747	0.13199	882.03
66.843	-0.08904	0.06299	0.13199	882.547
66.936	-0.0883	0.05877	0.13199	883.066
67.028	-0.08757	0.0548	0.13199	883.587
67.12	-0.08687	0.05107	0.13199	884.111
67.213	-0.0862	0.04757	0.13199	884.638
67.306	-0.08557	0.04431	0.13199	885.169
67.399	-0.085	0.04129	0.13199	885.701
67.493	-0.08447	0.0385	0.13199	886.234
67.586	-0.084	0.03592	0.13199	886.765
67.68	-0.08358	0.03358	0.13199	887.295
67.774	-0.08319	0.03141	0.13199	887.821
67.868	-0.08283	0.02942	0.13199	888.345
67.963	-0.08251	0.02759	0.13199	888.865
68.057	-0.08221	0.0259	0.13199	889.382
68.152	-0.08192	0.02433	0.13199	889.895
68.247	-0.08166	0.02288	0.13199	890.404
68.342	-0.0814	0.02151	0.13199	890.911
68.438	-0.08117	0.02023	0.13199	891.418
68.533	-0.08096	0.01901	0.13199	891.924
68.629	-0.08077	0.01786	0.13199	892.431
68.726	-0.08061	0.01674	0.13199	892.943
68.822	-0.0805	0.01568	0.13199	893.461
68.919	-0.08045	0.01465	0.13199	893.988
69.017	-0.08048	0.01366	0.13199	894.526
69.115	-0.0806	0.01274	0.13199	895.075
69.214	-0.08082	0.01186	0.13199	895.632
69.314	-0.08114	0.01105	0.13199	896.192
69.414	-0.08153	0.01031	0.13199	896.752
69.514	-0.08198	0.009644	0.13199	897.307
69.616	-0.08248	0.009038	0.13199	897.857
69.717	-0.08303	0.008489	0.13199	898.396
69.82	-0.08359	0.007996	0.13199	898.924
69.922	-0.08415	0.007556	0.13199	899.437
70.026	-0.08472	0.007154	0.13199	899.938
70.13	-0.08527	0.006782	0.13199	900.428
70.234	-0.08582	0.006441	0.13199	900.909
70.339	-0.08636	0.006121	0.13199	901.384
70.444	-0.08689	0.005826	0.13199	901.855
70.55	-0.08741	0.005538	0.13199	902.324
70.657	-0.08793	0.005273	0.13199	902.79
70.764	-0.08844	0.005011	0.13199	903.256
70.871	-0.08894	0.004766	0.13199	903.721
70.979	-0.08943	0.004529	0.13199	904.188
71.087	-0.08992	0.004307	0.13199	904.656
71.196	-0.09041	0.004092	0.13199	905.127
71.305	-0.09091	0.003883	0.13199	905.6
71.415	-0.0914	0.003686	0.13199	906.075
71.525	-0.09191	0.003495	0.13199	906.553
71.635	-0.09242	0.003314	0.13199	907.033
71.746	-0.09295	0.00314	0.13199	907.517
71.857	-0.0935	0.002971	0.13199	908.002
71.969	-0.09406	0.002811	0.13199	908.489
72.081	-0.09463	0.002657	0.13199	908.978
72.193	-0.09523	0.002515	0.13199	909.468
72.306	-0.09585	0.002382	0.13199	909.959
72.419	-0.09649	0.002262	0.13199	910.449
72.532	-0.09715	0.002138	0.13199	910.939
72.646	-0.09782	0.002029	0.13199	911.428
72.76	-0.09851	0.001922	0.13199	911.916
72.875	-0.09921	0.00182	0.13199	912.401
72.989	-0.09993	0.001734	0.13199	912.884
73.104	-0.10066	0.001642	0.13199	913.365
73.22	-0.1014	0.001562	0.13199	913.844
73.335	-0.10216	0.001485	0.13199	914.321
73.451	-0.10292	0.001406	0.13199	914.796
73.567	-0.1037	0.001342	0.13199	915.271
73.683	-0.10449	0.001273	0.13199	915.744
73.8	-0.1053	0.001206	0.13199	916.217
73.917	-0.10612	0.00115	0.13199	916.69
74.034	-0.10695	0.001084	0.13199	917.163
74.151	-0.1078	0.001036	0.13199	917.635
74.269	-0.10867	0.0009753	0.13199	918.105
74.386	-0.10955	0.0009305	0.13199	918.575
74.504	-0.11044	0.0008766	0.13199	919.043
74.622	-0.11135	0.0008386	0.13199	919.51
74.74	-0.11227	0.000794	0.13199	919.976
74.859	-0.1132	0.0007507	0.13199	920.44
74.977	-0.11415	0.0007145	0.13199	920.902
75.096	-0.1151	0.0006701	0.13199	921.363
75.214	-0.11607	0.0006381	0.13199	921.823
75.333	-0.11705	0.0006083	0.13199	922.28
75.452	-0.11804	0.0005701	0.13199	922.735
75.571	-0.11904	0.0005412	0.13199	923.189
75.69	-0.12005	0.0005099	0.13199	923.64
75.809	-0.12107	0.0004817	0.13199	924.089
75.928	-0.1221	0.00045	0.13199	924.537
76.047	-0.12314	0.0004329	0.13199	924.981
76.166	-0.12418	0.00041	0.13199	925.424
76.285	-0.12523	0.0003795	0.13199	925.864
76.404	-0.12629	0.0003625	0.13199	926.301
76.523	-0.12735	0.0003413	0.13199	926.737
76.642	-0.12843	0.000328	0.13199	927.169
76.761	-0.1295	0.0003111	0.13199	927.599
76.879	-0.13058	0.0002921	0.13199	928.025
76.998	-0.13167	0.000283	0.13199	928.449
77.117	-0.13276	0.0002731	0.13199	928.87
77.235	-0.13386	0.0002625	0.13199	929.288
77.354	-0.13497	0.0002532	0.13199	929.703
77.473	-0.13609	0.0002502	0.13199	930.116
77.591	-0.13722	0.0002508	0.13199	930.526
77.71	-0.13835	0.0002452	0.13199	930.934
77.828	-0.1395	0.0002435	0.13199	931.337
77.946	-0.14064	0.000255	0.13199	931.736
78.065	-0.14177	0.000247	0.13199	932.126
78.183	-0.14286	0.00025	0.13199	932.504
78.301	-0.14389	0.000255	0.13199	932.864
78.419	-0.14482	0.0002617	0.13199	933.195
78.537	-0.14561	0.0002691	0.13199	933.477
78.656	-0.14622	0.0002702	0.13199	933.716
78.774	-0.14691	0.0002802	0.13199	934
