# Supplementary material for: Gas transport in firn: multiple-tracer characterisation and model intercomparison for NEEM, Northern Greenland
Source: Copernicus journal article supplement (doi:10.5194/acp-12-4259-2012), 2012-05-14
Supplement: Supplementary file 17 [file SCENARIO_NEEM08_META_JUNE_2010_v2.xls]

## Sheet: Sheet1
Gas species	File name	unit	NOAA/AGAGE	made by	Date completed	original filename
CO2	SCENARIO_NEEM08_CO2.txt	ppm		Vas Petrenko	2010-03-16	CO2 input history_16_mar_2010.xls
CH4	SCENARIO_NEEM08_CH4.txt	ppb		Vas Petrenko	2010-03-09	Atm CH4 data Vas_09_mar_2010.xls
SF6	SCENARIO_NEEM08_SF6.txt	ppt	NOAA	Patricia Martinerie	2010-06-01	scen-PM-sf6-noaa-NH.r
14CO2	SCENARIO_NEEM08_14CO2.txt	1E-9 ppm		Mauro Rubino, Christo Buizert	2010-03-23	Isotopes_CO2_NEEM08_scenario_ppm.xls
CFC-11	SCENARIO_NEEM08_CFC11.txt	ppt	NOAA	Patricia Martinerie	2010-06-01	scen-PM-f11-noaa-NH.r
CFC-12	SCENARIO_NEEM08_CFC12.txt	ppt	NOAA	Patricia Martinerie	2010-06-01	scen-PM-f12-noaa-NH.r
CFC-113	SCENARIO_NEEM08_CFC113.txt	ppt	NOAA	Patricia Martinerie	2010-06-01	scen-PM-f113-noaa-NH.r
CCl4	SCENARIO_NEEM08_CCL4.txt	ppt	NOAA	Patricia Martinerie	2010-06-01	scen-PM-ccl4-noaa-NH.r
CH3CCl3	SCENARIO_NEEM08_CH3CCL3.txt	ppt	NOAA	Patricia Martinerie	2010-06-01	scen-PM-ch3ccl3-noaa-NH.r
HFC-134a	SCENARIO_NEEM08_HFC134a.txt	ppt	NOAA	Patricia Martinerie	2010-06-04	scen-PM-f134a-noaa-NH.r
